# Supplementary material
Source: PubMed Central journal article supplement (PMC9394372)
Supplement: cd-21-0910_supplementary_data_files_figures_and_tables_with_legends_supp1.pdf [file cd-21-0910_supplementary_data_files_figures_and_tables_with_legends_supp1.pdf]

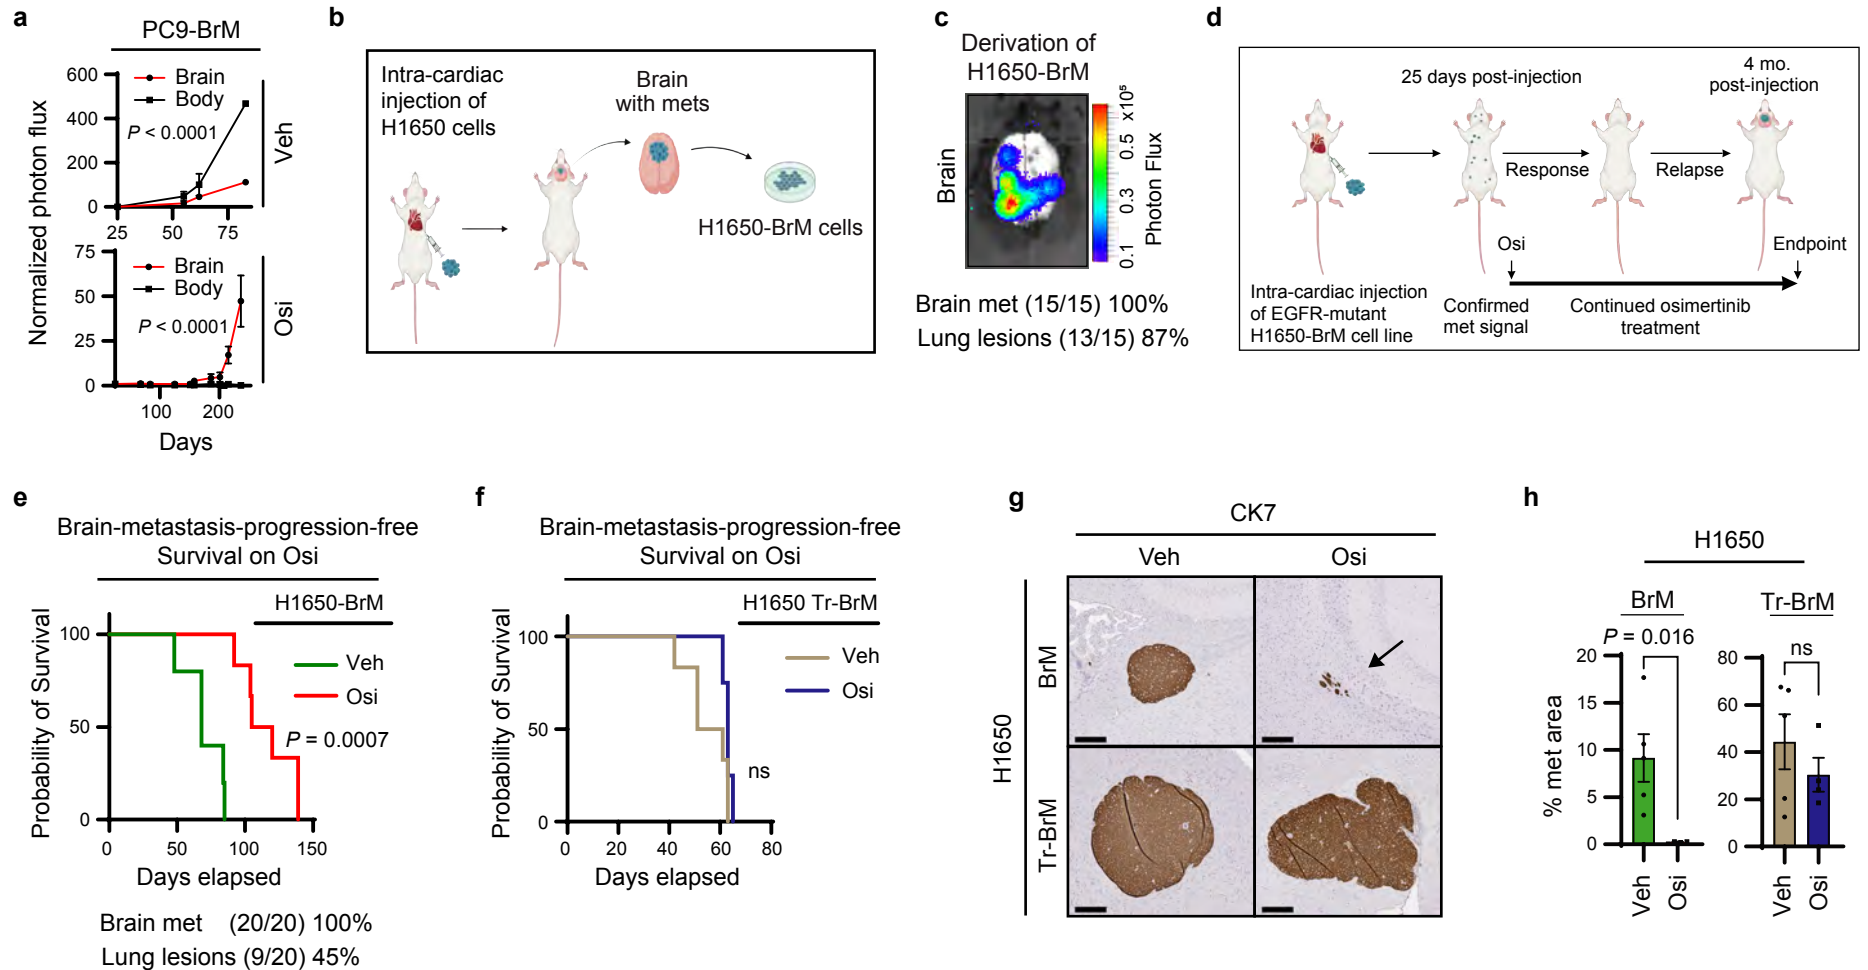

**Supplementary Figure 1. Fatal brain relapse in osimertinib-treated, metastatic lung cancer mouse models.**

(a) Quantitation of photon flux of brain versus rest of the body (representing extracranial sites such as bone and lymph nodes) by longitudinal imaging in mice from the experiments described in Fig. 1a-c involving the PC9-derived model. Days represent days after initial tumor-cell injection. Data is normalized to day 25 (the initial day of treatment). N = 4 for vehicle-treated mice, and n = 4 for osimertinib-treated mice. Data are representative of three independent experiments.

(b) Schematic representing the generation of brain-metastatic-derivative (BrM) cells from the EGFR-mutant H1650 parental cell line by the *in-vivo* selection method.

(c) Representative image of *ex-vivo* bioluminescence imaging of a brain collected from a mouse injected with the H1650 parental cell line (to generate the H1650 BrM line as described in panel (b)). The photon-flux scale is indicated on the right side. The data are representative of three independent experiments. The percentage of mice (n = 15) with brain and lung lesions is shown.

(d) Schematic representation of the human EGFR-mutant H1650-BrM *in-vivo* treatment model for metastatic EGFR-mutant lung cancer. Luciferase-labeled H1650-BrM cells were injected into the arterial circulation of immunodeficient mice via intracardiac injection to generate metastases, which were detected by bioluminescence imaging. At 25 days post tumor-cell injection, after confirmation of metastatic signal, mice were administered long-term treatment with either vehicle or osimertinib at 5 mg/kg body weight/day by oral gavage, 5 days per week, until the endpoint, which averaged to 4 months post tumor-cell injection.

(e) Kaplan–Meier plot for brain-metastasis-progression-free survival of mice injected with H1650-BrM cells followed by treatment with either vehicle (“Veh”) or osimertinib (“Osi”). Days elapsed represent days after initial tumor-cell injection. Data were analyzed using the log-rank test:  $\chi^2 = 11.42$ , d.f. = 1,  $p = 0.0007$ , n = 5 for vehicle-treated mice, and n = 6 for osimertinib-treated mice. The percentage of mice (n = 20) with brain and lung lesions post-osimertinib treatment is shown from multiple experiments.

(f) Kaplan–Meier plot for brain-metastasis-progression-free survival of mice injected with H1650-Tr-BrM cells followed by treatment with either vehicle or osimertinib. Data were analyzed using the log-rank test:  $\chi^2 = 2.541$ , d.f. = 1,  $p$ -value not significant (ns), n = 6 for vehicle-treated mice, and n = 4 for osimertinib-treated mice.

(g) Representative images of human cytokeratin 7 (CK7) immunohistochemistry in brain sections from mice injected with either H1650-BrM (upper panel) or H1650-Tr-BrM cells (lower panel) and treated with either vehicle (left panel) or osimertinib (right panel). Arrow points to the location of metastatic cells in the brain. Mice were euthanized at 60 days post tumor-cell injection. Scale bars, 200  $\mu$ m.

(h) Quantitative analysis of the percentage of brain tissue sections covered by metastasis from the experiment described in panel (g). Data are presented as mean values  $\pm$  SEM.  $P$ -values were determined by a two-tailed, unpaired Mann-Whitney test. For H1650-BrM, n = 5 for vehicle and n = 4 for osimertinib; for H1650-Tr-BrM, n = 5 for vehicle and n = 4 for osimertinib.

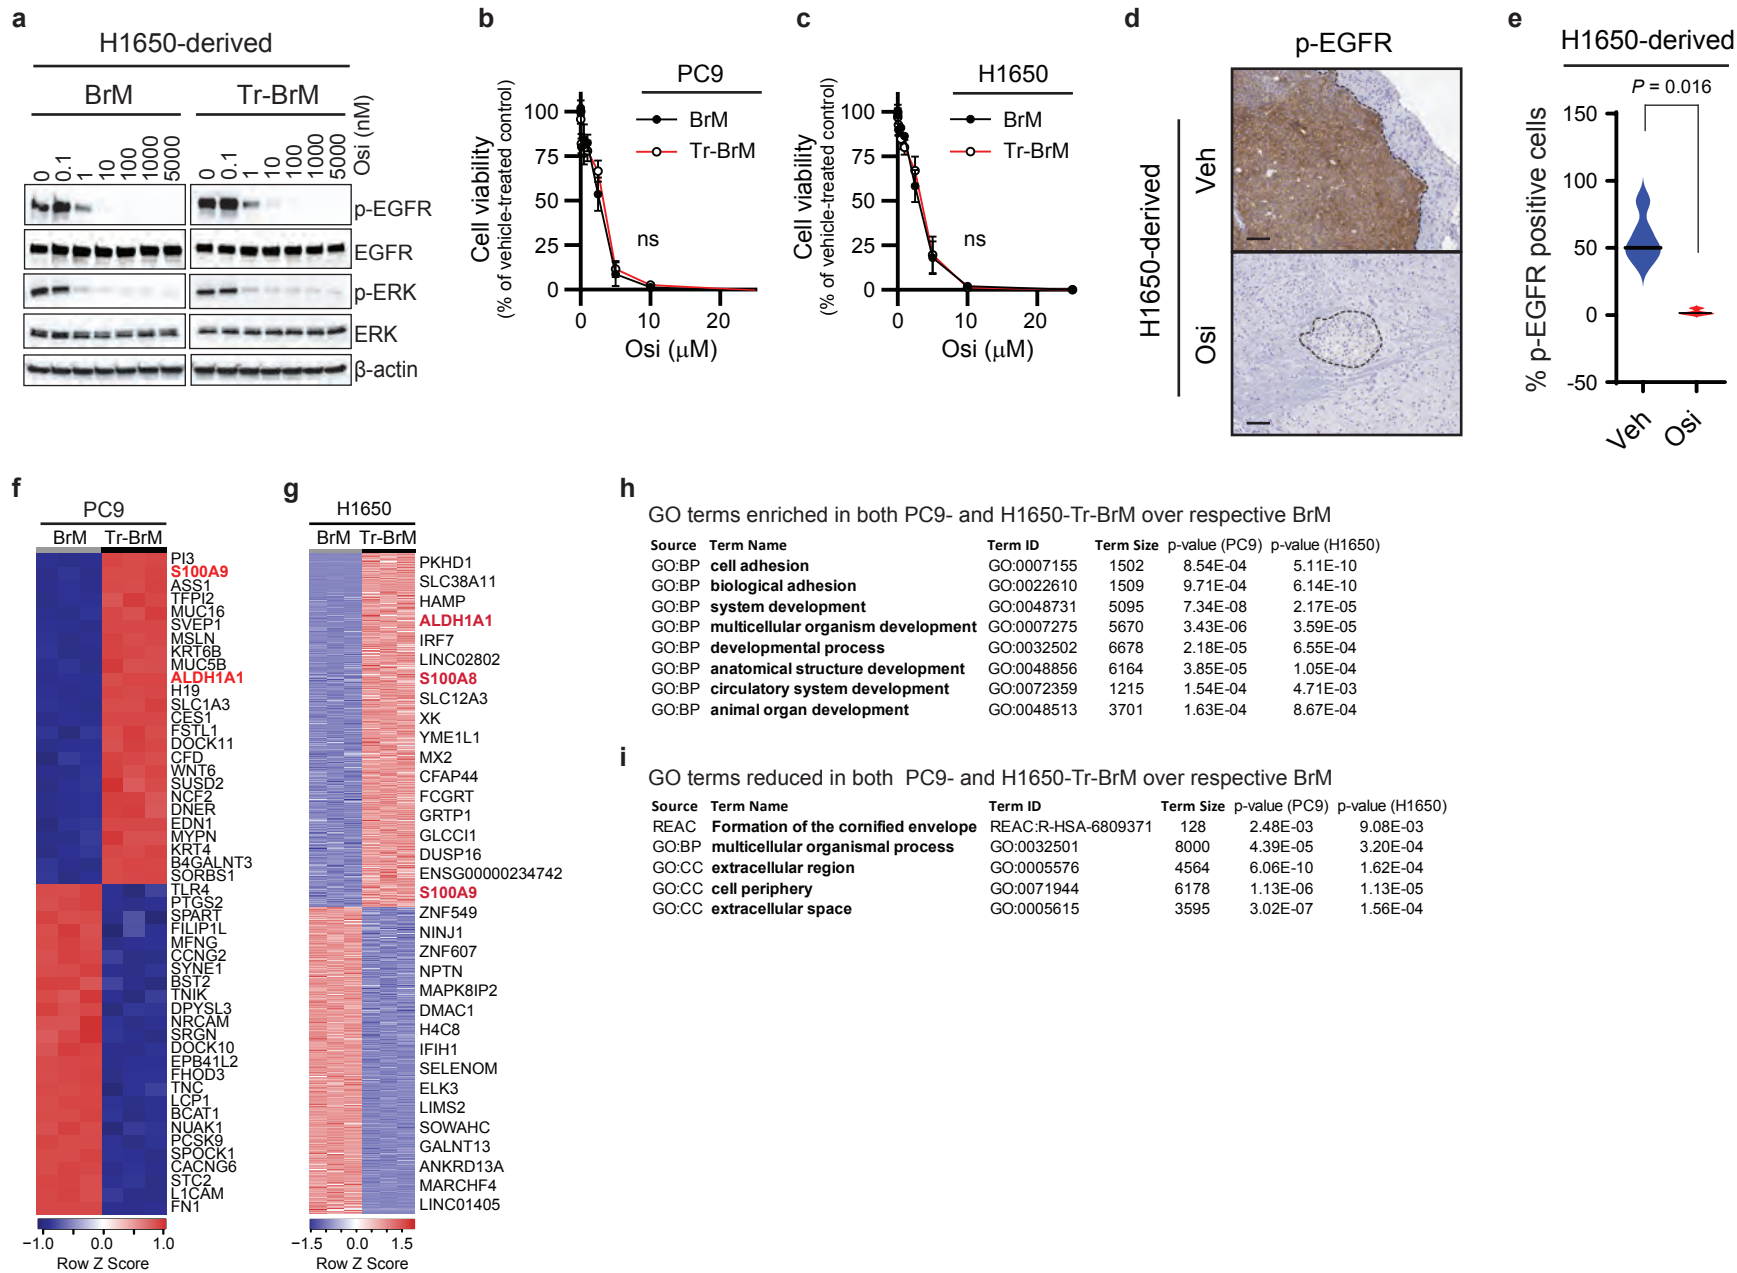

## Supplementary Figure 2. Enrichment of S100A8/9 proteins in osimertinib-refractory cancer cells.

(a) Immunoblot analysis for EGFR pathway activation in H1650-BrM and H1650-Tr-BrM cells treated with the indicated doses of osimertinib and collected at 6 hours post treatment. Antibodies against phospho-EGFR (Tyr1068), phospho-ERK, total-EGFR, total-ERK and  $\beta$ -actin (loading control) were used. Data are representative of three independent experiments.

(b) *In-vitro* cell viability assay for comparing osimertinib sensitivity between PC9-BrM and PC9-Tr-BrM derivatives. Cell viability values are normalized to the vehicle (DMSO)-treated control, presented as mean values  $\pm$  SEM, and representative of three independent experiments.

(c) *In-vitro* cell viability assay for comparing osimertinib-sensitivity between H1650-BrM and H1650-Tr-BrM derivatives. Cell viability values are normalized to the vehicle (DMSO)-treated control, presented as mean values  $\pm$  SEM, and representative of three independent experiments.

(d) Brain sections from mice injected with H1650-BrM cells described in Supplementary Fig. 1g-h were immunostained using an antibody against phospho-EGFR (Tyr1068). H1650-BrM cells were injected into the arterial circulation of immunodeficient mice via intracardiac injection to generate metastases. Treatment was started at 25 days post tumor-cell injection with either vehicle or osimertinib at 5 mg/kg body weight/day by oral gavage, administered 5 days per week, and continued until endpoint at two months post tumor-cell injection. Mice were then euthanized, and brain tissues were subsequently processed for histological analysis. Representative images of immunohistochemical staining for phospho-EGFR in brain sections are shown. Dotted lines surround the location of metastatic cells in the brain. Scale bars, 100  $\mu$ m.

(e) The pEGFR-stained brain sections from the H1650-derived model described in panel (d) were quantitated using automated Qu-Path software to count pEGFR-positive cancer cells that were identified by setting a threshold for signal intensity (1+). Data are represented as mean values  $\pm$  SEM. The *p*-value was determined by a two-tailed, unpaired Mann-Whitney test: *n* = 5 for vehicle-treated mice and *n* = 5 for osimertinib-treated mice.

(f) Heatmap of the top 25 significantly up- and down-regulated genes in PC9-Tr-BrM cells compared to PC9-BrM cells. Normalized gene expression above the row mean is indicated by progressively darker shades of red, and normalized gene expression below the row mean is indicated by progressively darker shades of blue. Genes with an adjusted *p*-value of less than  $1.0 \times 10^{-4}$  and an absolute value of the log<sub>2</sub> fold change of greater than 2.4 were considered significant.

(g) Heatmap of the top significantly up-regulated (2133) and down-regulated (2460) genes in H1650-Tr-BrM versus H1650-BrM cells is shown. Normalized gene expression above the row mean is indicated by progressively darker shades of red, and normalized gene expression below the row mean is indicated by progressively darker shades of blue. Genes with an adjusted *p*-value of less than  $1.0 \times 10^{-4}$  and an absolute value of the log<sub>2</sub> fold change of greater than 0.5 were considered significant. Approximate positions of the indicated genes are shown in the heatmap.

(h) GO terms identified as significant and convergent via GO-term analysis of the top 300 up-regulated genes in PC9- and H1650-Tr-BrM lines compared to their respective controls by G:Profiler analysis.

(i) GO terms identified as significant and convergent via GO-term analysis of the top 300 down-regulated genes in PC9- and H1650-Tr-BrM lines compared to their respective controls by G:Profiler analysis.

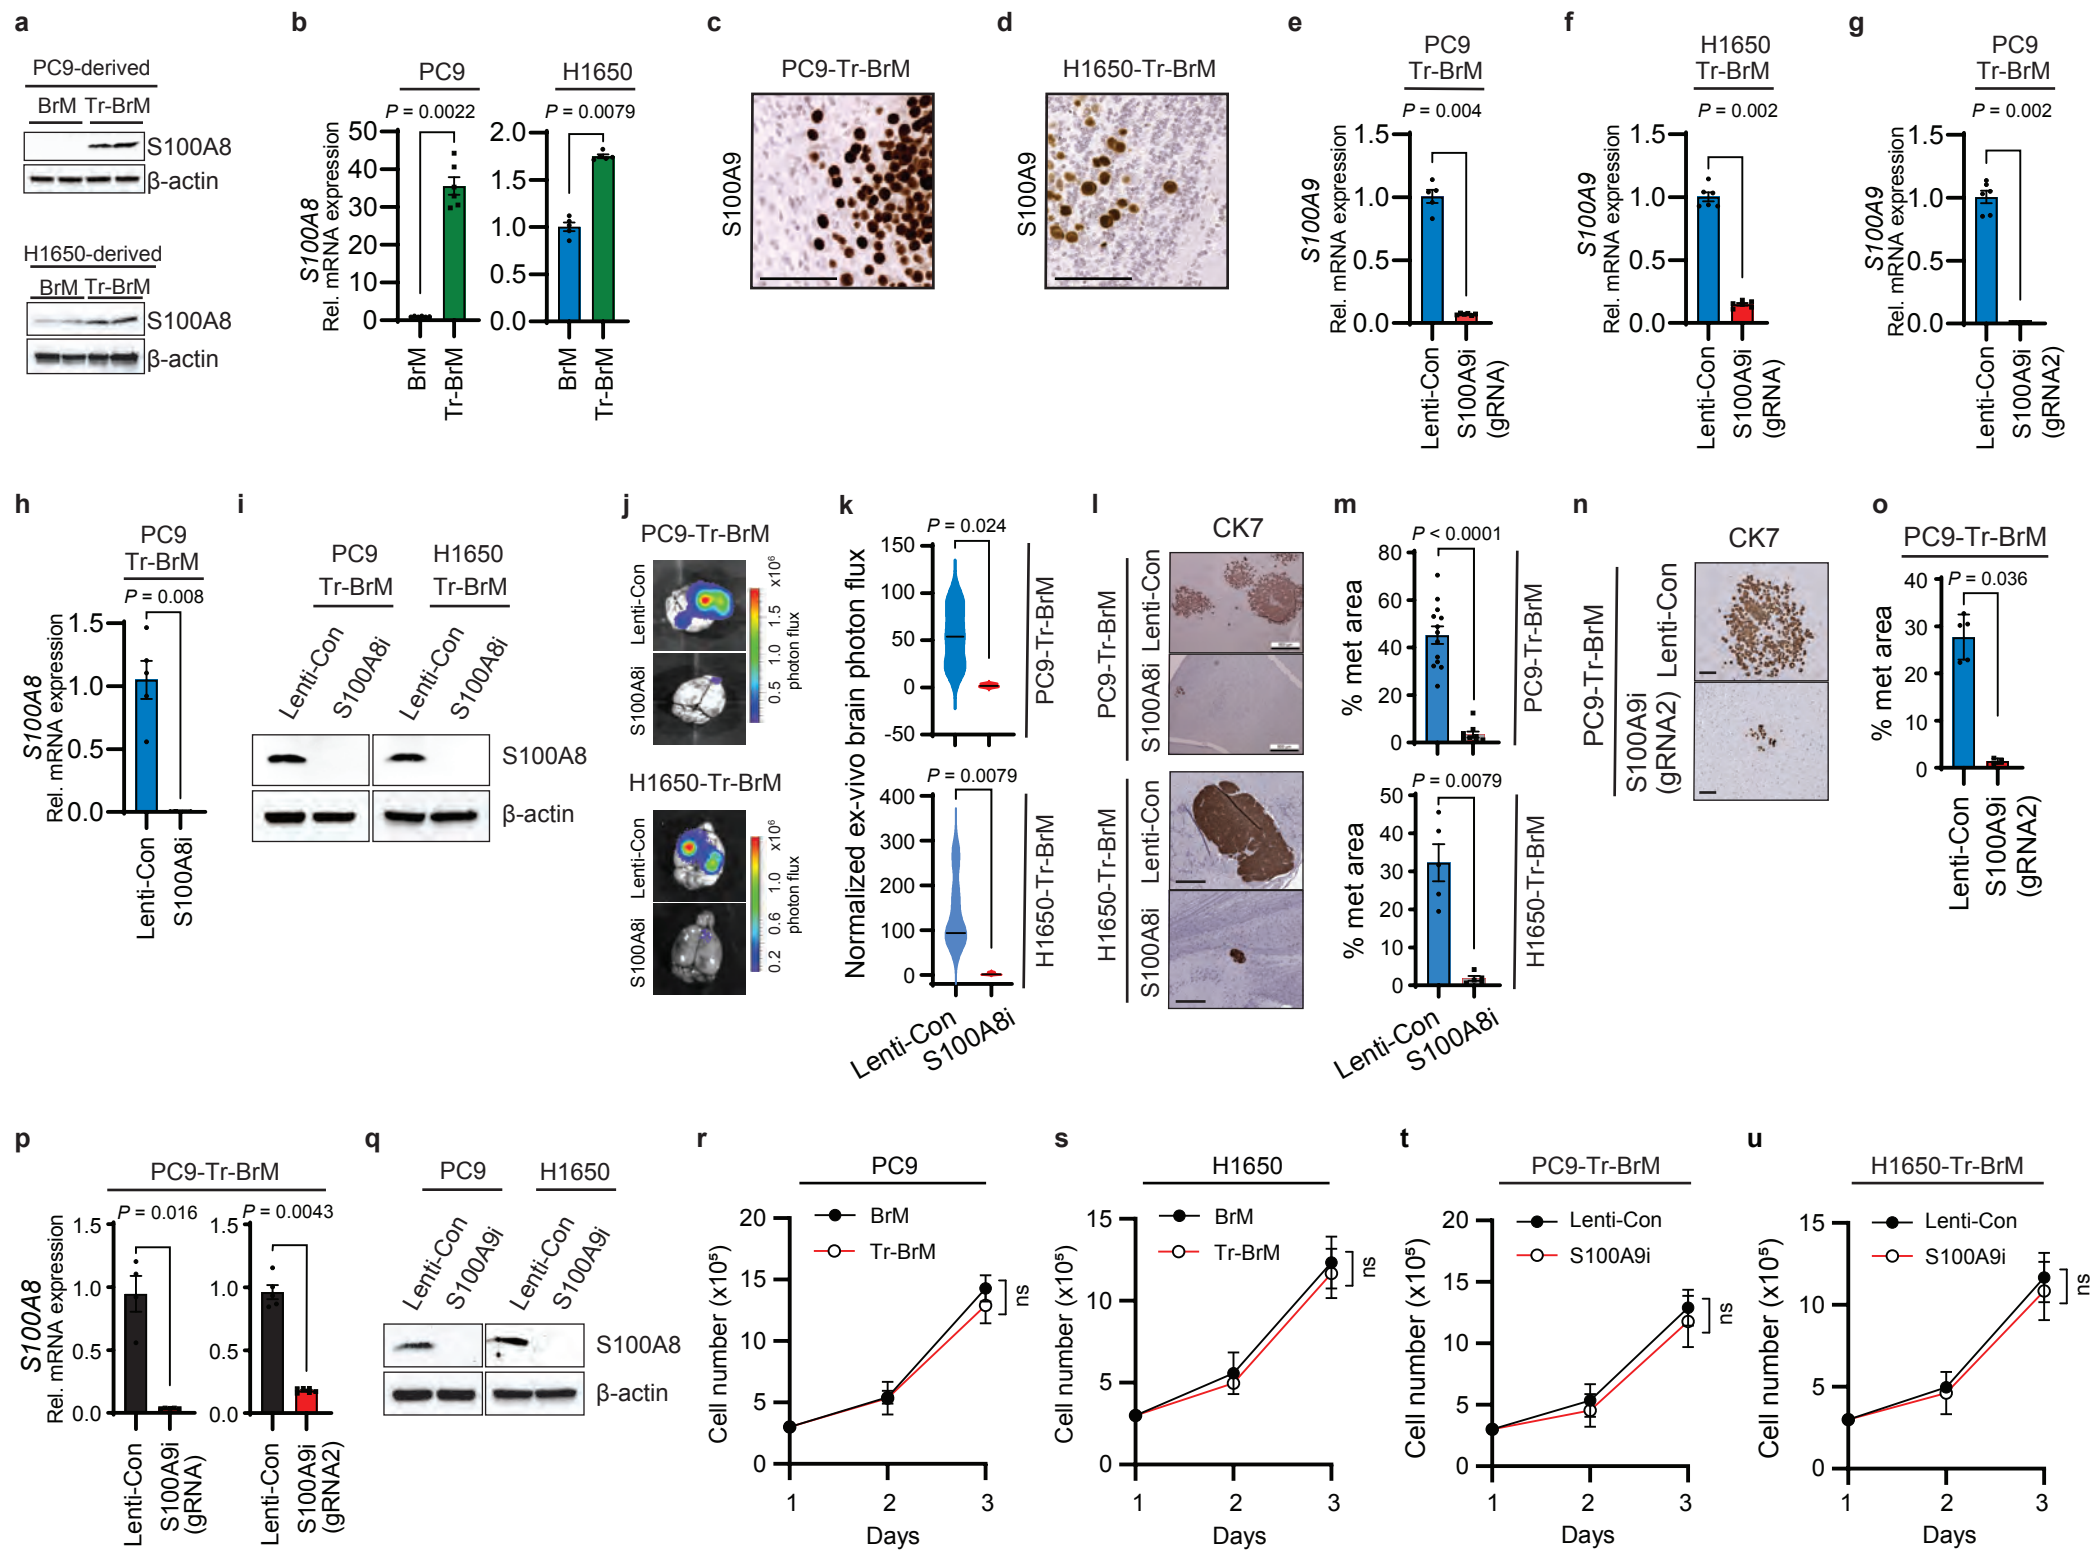

**Supplementary Figure 3. S100A8/9 as key mediators of brain relapse in osimertinib-refractory lung cancer cells.**

(a) Immunoblot analysis of lysates from BrM and Tr-BrM cells from both PC9- and H1650-derived models using antibodies against S100A8 and  $\beta$ -actin (loading control). Images are representative of three independent experiments.

(b) *S100A8* expression was determined by quantitative RT-PCR (qRT-PCR) analysis in PC9- and H1650-derived BrM and Tr-BrM cells. GAPDH was used as an internal control. Data are presented as mean values  $\pm$  SEM. *P*-values were determined by a two-tailed, unpaired Mann-Whitney test. For PC9, *n* = 6 for BrM, and *n* = 6 for Tr-BrM. For H1650, *n* = 5 for BrM, and *n* = 5 for Tr-BrM.

(c-d) Representative images of brain sections stained with an antibody against human S100A9 from mice bearing brain metastases when injected with PC9-Tr-BrM cells (c) and H1650-Tr-BrM cells (d) and collected 7 weeks post tumor-cell injection. Scale bar, 100  $\mu$ m.

(e) S100A9 expression was determined by qRT-PCR analysis in PC9-Tr-BrM cells expressing either lenti-control ("Lenti-Con") or S100A9i. GAPDH was used as an internal control. Data are presented as mean values  $\pm$  SEM. The *p*-value was determined by a two-tailed, unpaired Mann-Whitney test, *n* = 5 for Lenti-Con, and *n* = 6 for S100A9i.

(f) *S100A9* expression was determined by qRT-PCR analysis in H1650-Tr-BrM cells expressing either Lenti-Con or S100A9i. GAPDH was used as an internal control. Data are presented as mean values  $\pm$  SEM. The *p*-value was determined by a two-tailed, unpaired Mann-Whitney test, *n* = 6 for Lenti-Con and *n* = 6 for S100A9i.

(g) *S100A9* expression was determined by qRT-PCR analysis in PC9-Tr-BrM cells expressing either Lenti-Con or a second guide-RNA for S100A9i (referred to as "S100A9i (gRNA2)" throughout the supplemental figures). GAPDH was used as an internal control. Data are presented as mean values  $\pm$  SEM. The *p*-value was determined by a two-tailed, unpaired Mann-Whitney test, *n* = 6 for Lenti-Con and *n* = 6 for S100A9i-gRNA2.

(h) *S100A8* expression was determined by qRT-PCR analysis in PC9-Tr-BrM cells expressing either Lenti-Con or S100A8i. GAPDH was used as an internal control. Data are presented as mean values  $\pm$  SEM. The *p*-value was determined by a two-tailed, unpaired Mann-Whitney test: *n* = 5 for Lenti-Con, and *n* = 5 for S100A8i.

(i) Immunoblot analyses of lysates from PC9- and H1650-derived Tr-BrM cells expressing either Lenti-Con or S100A8i using antibodies against S100A8 and  $\beta$ -actin (loading control). Data is representative of three independent experiments.

(j) *Ex-vivo* photon flux of brains from mice injected with either PC9- or H1650-derived Tr-BrM cells expressing either Lenti-Con or S100A8i was determined by bioluminescence imaging. Mice were collected at 7 weeks post tumor-cell injection. The photon-flux scale is indicated on the right side of the image.

(k) Violin plots depicting the normalized photon flux of brains imaged *ex-vivo* that are represented in panel (j). The normalized photon flux for brain was calculated by dividing the photon flux from brain collected *ex-vivo* by the total photon flux at day 0 (i.e., the day of injection) and multiplying that value by 100. Data are presented as mean values  $\pm$  SEM. *N* = 6 mice for PC9-Tr-BrM-Lenti-Con, *n* = 3 for PC9-Tr-BrM-S100A8i, *n* = 5 per group for both H1650-Tr-BrM-Lenti-Con and H1650-Tr-BrM-S100A8i. The *p*-values were determined by a two-tailed, unpaired Mann-Whitney test.

(l) Representative images of CK7 immunohistochemistry in brain sections from mice injected with either PC9- or H1650-derived Tr-BrM cells expressing either Lenti-Con or S100A8i. Mice were harvested at 7 weeks post tumor-cell injection. Scale bars, 200  $\mu\text{m}$ .

(m) Quantitative analysis of the percentage of CK7-immunostained brain sections covered by metastasis that are represented in panel (l). Data are presented as mean values  $\pm$  SEM. *P*-values were determined by a two-tailed, unpaired Mann-Whitney test. *N* = 5 per group for both PC9 and H1650-derived Tr-BrM-Lenti-Con and PC9-Tr-BrM-S100A8i.

(n) Representative images of CK7 immunohistochemistry in brain sections from mice injected with PC9-Tr-BrM-Lenti-Con cells or PC9-Tr-BrM-S100A9i-gRNA2 cells. Mice were harvested at 7 weeks post tumor-cell injection. Scale bars, 100  $\mu\text{m}$ .

(o) Quantitative analysis of the percentage of CK7-immunostained brain sections covered by metastasis from the experiment represented in panel (n). Data are presented as mean values  $\pm$  SEM. The *p*-value was determined by a two-tailed, unpaired Mann-Whitney test: *n* = 5 for PC9-Tr-BrM-Lenti-Con, and *n* = 3 for PC9-Tr-BrM-S100A9i-gRNA2.

(p) *S100A8* expression was determined by qRT-PCR analysis in PC9-Tr-BrM cells expressing either Lenti-Con, S100A9i (left graph) or S100A9i-gRNA2 (right graph). GAPDH was used as an internal control. Data are presented as mean values  $\pm$  SEM. *P*-values were determined by a two-tailed, unpaired Mann-Whitney test. For the left graph, *n* = 4 for PC9-Tr-BrM-Lenti-Con, and *n* = 5 for PC9-Tr-BrM S100A9i. For the right graph, *n* = 5 for PC9-Tr-BrM-Lenti-Con and *n* = 6 for PC9-Tr-BrM-S100A9i-gRNA2.

(q) Immunoblot analysis of lysates from PC9- and H1650-derived Tr-BrM cells expressing either Lenti-Con or S100A9i using antibodies against S100A8 and  $\beta$ -actin (loading control). Data are representative of three independent experiments.

(r) *In-vitro* cell proliferation assay comparing PC9-BrM and PC9-Tr-BrM cells. Data are presented as the mean cell number  $\pm$  SEM and are representative of three independent experiments.

(s) *In-vitro* cell proliferation assay comparing H1650-BrM and H1650-Tr-BrM cells. Data are presented as the mean cell number  $\pm$  SEM and are representative of three independent experiments.

(t) *In-vitro* cell proliferation assay comparing PC9-Tr-BrM-Lenti-Con and PC9-Tr-BrM-S100A9i cells. Data are presented as the mean cell number  $\pm$  SEM and are representative of three independent experiments.

(u) *In-vitro* cell proliferation assay comparing H1650-Tr-BrM-Lenti-Con and H1650-Tr-BrM-S100A9i cells. Data are presented as the mean cell number  $\pm$  SEM and are representative of three independent experiments.



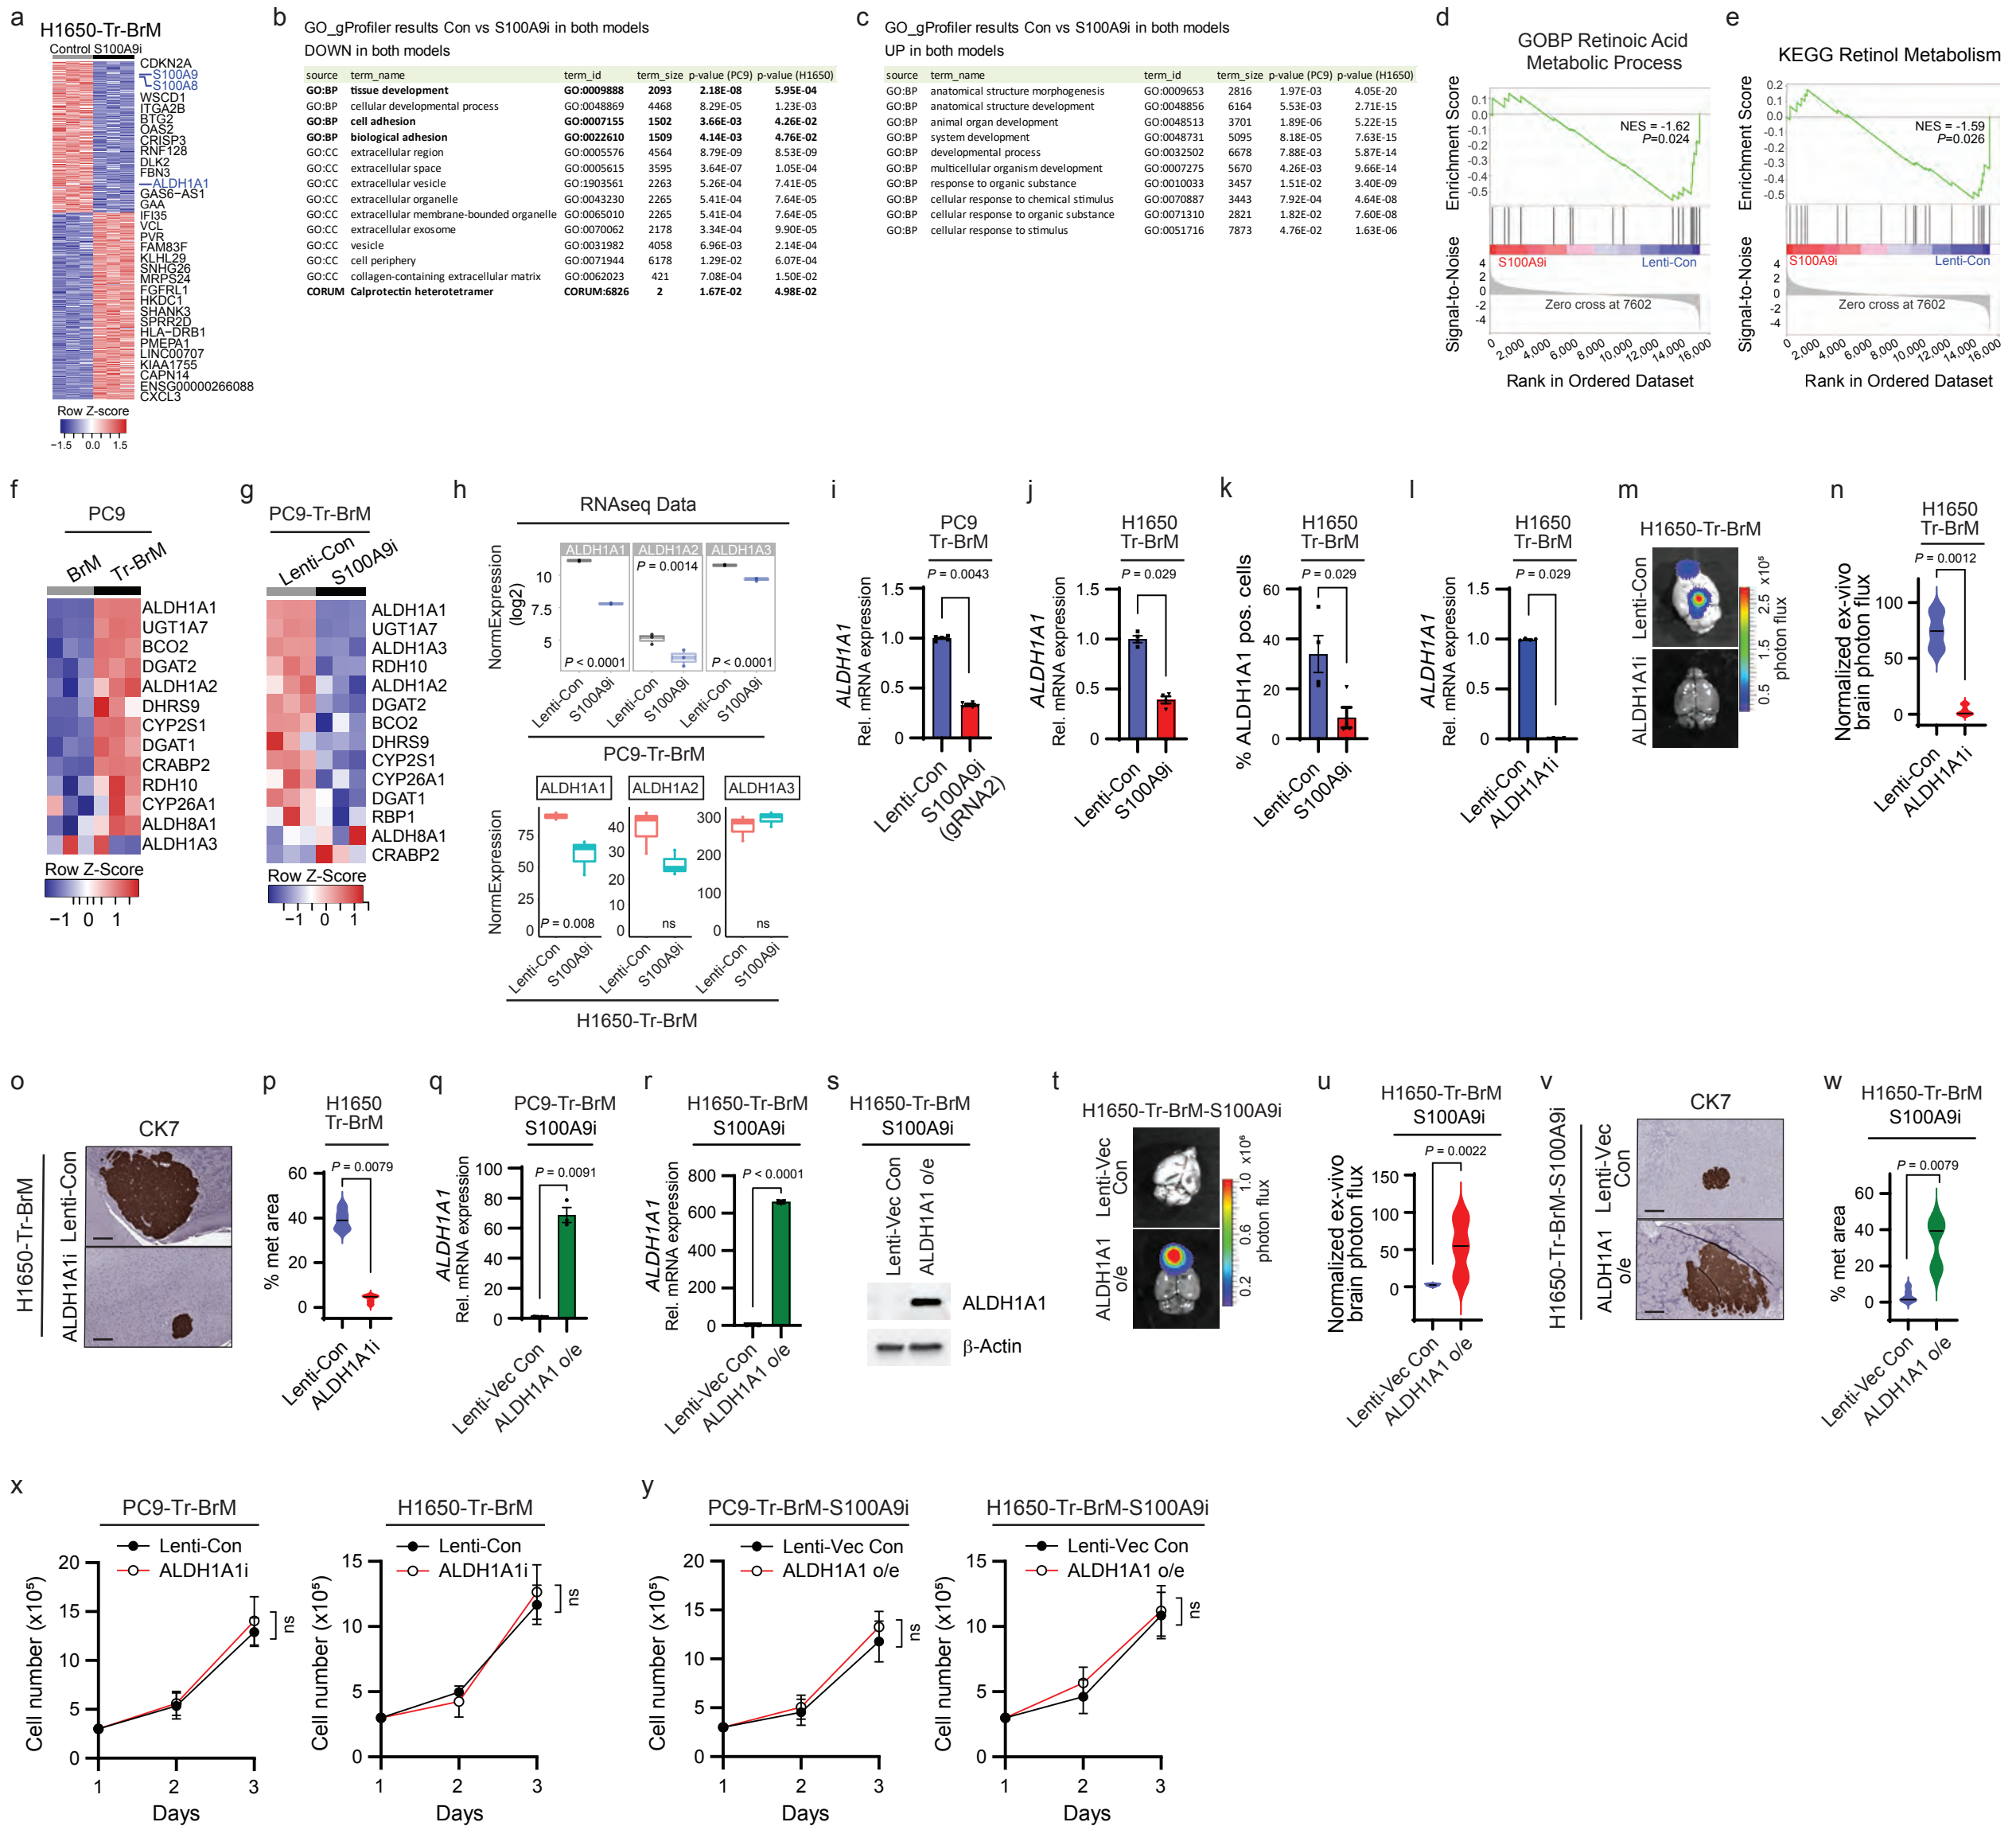

**Supplementary Figure 4. Down-regulation of ALDH1A1 in brain metastatic cells upon S100A9 repression.**

(a) Heatmap of the top 855 significantly up-regulated (473) and down-regulated (382) genes in H1650-Tr-BrM-derived S100A9i cells versus Lenti-Control cells ("Control"). Normalized gene expression above the row mean is indicated by progressively darker shades of red, and normalized gene expression below the row mean is indicated by progressively darker shades of blue. Genes with an adjusted  $p$ -value of less than  $1.0 \times 10^{-3}$  and an absolute value of the log<sub>2</sub> fold change of greater than 1.5 were considered significant. Approximate positions of the indicated genes in the heatmap are shown.

(b) GO terms identified as significant and convergent via GO-term analysis of the top 300 down-regulated genes upon S100A9 repression in the PC9- and H1650-derived Tr-BrM cell lines by G:Profiler Analysis.

(c) GO terms identified as significant and convergent via GO-term analysis of the top 300 up-regulated genes upon S100A9 repression in the PC9- and H1650-derived cell lines by G:Profiler Analysis.

(d-e) Gene set enrichment plots for GOBP Retinoic Acid Metabolism Process and KEGG Retinol Metabolism signatures from the RNA-seq expression profiling data comparing PC9-Tr-BrM-S100A9i to PC9-Tr-BrM-Lenti-Con cells in Fig. 5b. Genes are ranked according to their expression in PC9-Tr-BrM-S100A9i cells from left to right. A positive normalized enrichment score (NES) indicates signature enrichment in PC9-Tr-BrM-S100A9i cells, and a negative normalized enrichment score indicates signature enrichment in PC9-Tr-BrM-Lenti-Con cells.

(f-g) Heatmaps of key retinoic acid metabolism genes in the PC9-BrM versus PC9-Tr-BrM RNA-seq datasets from Supplementary Fig. 2f and in the PC9-Tr-BrM-Lenti-Con versus PC9-Tr-BrM-S100A9i datasets from Fig. 5b. Shown here are the genes comprising the combined leading edges from both the GOBP Retinoic Acid Metabolism Process and the KEGG Retinol Metabolism gene sets in both the PC9-BrM-versus-PC9-Tr-BrM and the PC9-Tr-BrM-Lenti-Con-versus-PC9-Tr-BrM-S100A9i RNA-seq datasets. All leading-edge genes with detectable expression levels in the respective RNA-seq datasets were included in both (f) and (g). Normalized gene expression above the row mean is indicated by progressively darker shades of red, and normalized gene expression below the row mean is indicated by progressively darker shades of blue.

(h) Boxplots of normalized gene expression of *ALDH1A1*, *ALDH1A2* and *ALDH1A3* in both PC9- and H1650-derived Tr-BrM-Lenti-Con and Tr-BrM-S100A9i cells (PC9 model shown as log<sub>2</sub>-normalized expression and H1650 as normalized expression). Horizontal lines indicate the 25th and 75th quartiles and the median, and whiskers indicate the minimum and maximum values.  $P$ -values represent the adjusted  $p$ -value (Wald test) for the differences in expression of each gene between PC9- and H1650-derived Tr-BrM-S100A9i and Tr-BrM-Lenti-Con cells.

(i) *ALDH1A1* expression was determined by qRT-PCR analysis in PC9-Tr-BrM cells expressing either Lenti-Con or S100A9i-gRNA2. GAPDH was used as an internal control. Data are presented as mean values  $\pm$  SEM. The  $p$ -value was determined by a two-tailed, unpaired Mann-Whitney test,  $n = 6$  for Lenti-Con, and  $n = 6$  for S100A9i-gRNA2.

(j) *ALDH1A1* expression was determined by qRT-PCR analysis in H1650-Tr-BrM cells expressing either Lenti-Con or S100A9i. GAPDH was used as an internal control. Data are presented as mean values  $\pm$  SEM. The *p*-value was determined by a two-tailed, unpaired Mann-Whitney test, *n* = 4 for Lenti-Con and *n* = 4 for S100A9i.

(k) Quantitative analysis of the *ALDH1A1*-positive cells from brain sections (that were stained with an antibody against *ALDH1A1*) taken from mice injected with H1650-Tr-BrM cells expressing either Lenti-Con or S100A9i and collected at 7 weeks post tumor-cell injection. Immunostained sections were counted using the Qu-Path software where positively stained cells were identified by setting a threshold for signal intensity (1+). Data are presented as mean values  $\pm$  SEM. The *p*-value was determined by a two-tailed, unpaired Mann-Whitney test: *n*=4 for Lenti-Con, and *n*=4 for S100A9i.

(l) *ALDH1A1* expression was determined by qRT-PCR analysis in H1650-Tr-BrM cells expressing either Lenti-Con or *ALDH1A1i*. GAPDH was used as an internal control. Data are presented as mean values  $\pm$  SEM. The *p*-value was determined by a two-tailed, unpaired Mann-Whitney test: *n* = 4 for Lenti-Con, and *n* = 4 for *ALDH1A1i*.

(m) *Ex-vivo* photon flux of brains from mice injected with H1650-Tr-BrM cells expressing either Lenti-Con or *ALDH1A1i* was determined by bioluminescence imaging. Mice were collected at 7 weeks post tumor-cell injection. The photon flux scale is indicated on the right side of the image.

(n) Violin plots depicting normalized photon flux of brains imaged *ex-vivo* from the mice described in panel (m). The normalized photon flux for brain was calculated by dividing the photon flux from brain collected *ex-vivo* by the total photon flux at day 0 (i.e., the day of injection) and multiplying that value by 100. Data are presented as mean values  $\pm$  SEM. *P*-values were determined by a two-tailed, unpaired Mann-Whitney test: *n* = 6 for H1650-Tr-BrM-Lenti-Con, and *n* = 7 for H1650-Tr-BrM-*ALDH1A1i*.

(o) Representative images of CK7 immunohistochemistry in brain sections from mice injected with H1650-derived Tr-BrM cells expressing either Lenti-Con or *ALDH1A1i*. Mice were euthanized at 7 weeks post tumor-cell injection. Scale bars, 200  $\mu$ m.

(p) Quantitative analysis of the percentage of CK7-immunostained brain sections covered by metastasis that are represented in panel (o). Data are presented as mean values  $\pm$  SEM. *P*-values were determined by a two-tailed, unpaired Mann-Whitney test: *n* = 5 for H1650-Tr-BrM-Lenti-Con, and *n* = 5 for H1650-Tr-BrM-*ALDH1A1i*.

(q) *ALDH1A1* expression was determined by qRT-PCR analysis in PC9-Tr-BrM-S100A9i cells expressing either lenti-vector control ("Lenti-Vec Con") or *ALDH1A1* cDNA ("*ALDH1A1 o/e*"). GAPDH was used as an internal control. Data are presented as mean values  $\pm$  SEM. The *p*-value was determined by a two-tailed, unpaired Mann-Whitney test, *n* = 9 for Lenti-Vec Con, and *n* = 3 for *ALDH1A1 o/e*.

(r) *ALDH1A1* expression was determined by qRT-PCR analysis in H1650-Tr-BrM-S100A9i cells expressing either Lenti-Vec Con or *ALDH1A1 o/e*. GAPDH was used as an internal control. Data are presented as mean values  $\pm$  SEM. The *p*-value was determined by a two-tailed, unpaired Mann-Whitney test, *n* = 3 for Lenti-Vec-Con, and *n* = 3 for *ALDH1A1 o/e*.

(s) Immunoblot analyses of lysates from H1650-Tr-BrM-S100A9i cells expressing either Lenti-Vec Con or ALDH1A1 o/e using antibodies against ALDH1A1 and  $\beta$ -actin (loading control). Data is representative of three independent experiments.

(t) *Ex-vivo* photon flux of brains from mice injected with H1650-Tr-BrM-S100A9i cells expressing either Lenti-Vec Con or ALDH1A1 o/e was determined by bioluminescence imaging. Mice were collected at 7 weeks post tumor-cell injection. The photon flux scale is indicated on the right side of the image.

(u) Violin plots depicting normalized photon flux of brains imaged *ex vivo* from the mice represented in (t). The normalized photon flux for brain was calculated by dividing the photon flux from brain collected *ex-vivo* by the total photon flux at day 0 (i.e., the day of injection) and multiplying that value by 100. Data are presented as mean values  $\pm$  SEM. *P*-values were determined by a two-tailed, unpaired Mann-Whitney test:  $n = 6$  for Lenti-Vec-Con, and  $n = 6$  for ALDH1A1o/e.

(v) Representative images of CK7 immunohistochemistry in brain sections from mice injected with either H1650-Tr-BrM-S100A9i-Lenti-Vec Con cells (upper panel) or H1650-Tr-BrM-S100A9i-ALDH1A1 o/e cells (lower panel). Mice were euthanized at 7 weeks post tumor-cell injection. Scale bars, 200  $\mu$ m.

(w) Quantitative analysis of the percentage of CK7-immunostained brain sections covered by metastasis that are represented in panel (v). Data are presented as mean values  $\pm$  SEM. *P*-values were determined by a two-tailed, unpaired Mann-Whitney test:  $n = 5$  for Lenti-Vec-Con, and  $n = 5$  for ALDH1A1 o/e.

(x) *In-vitro* cell proliferation assay of PC9-Tr-BrM cells expressing either Lenti-Con or ALDH1A1i guide-RNAs (left panel) and H1650-Tr-BrM cells expressing either Lenti-Con or ALDH1A1i guide-RNAs (right panel). Data are presented as the mean cell number  $\pm$  SEM and are representative of three independent experiments.

(y) *In-vitro* cell proliferation assay of PC9-Tr-BrM-S100A9i cells expressing either Lenti-Vec Con or ALDH1A1 o/e (left panel) and H1650-Tr-BrM-S100A9i cells expressing either Lenti-Vec Con or ALDH1A1 o/e (right panel). Data are presented as the mean cell number  $\pm$  SEM and are representative of three independent experiments.

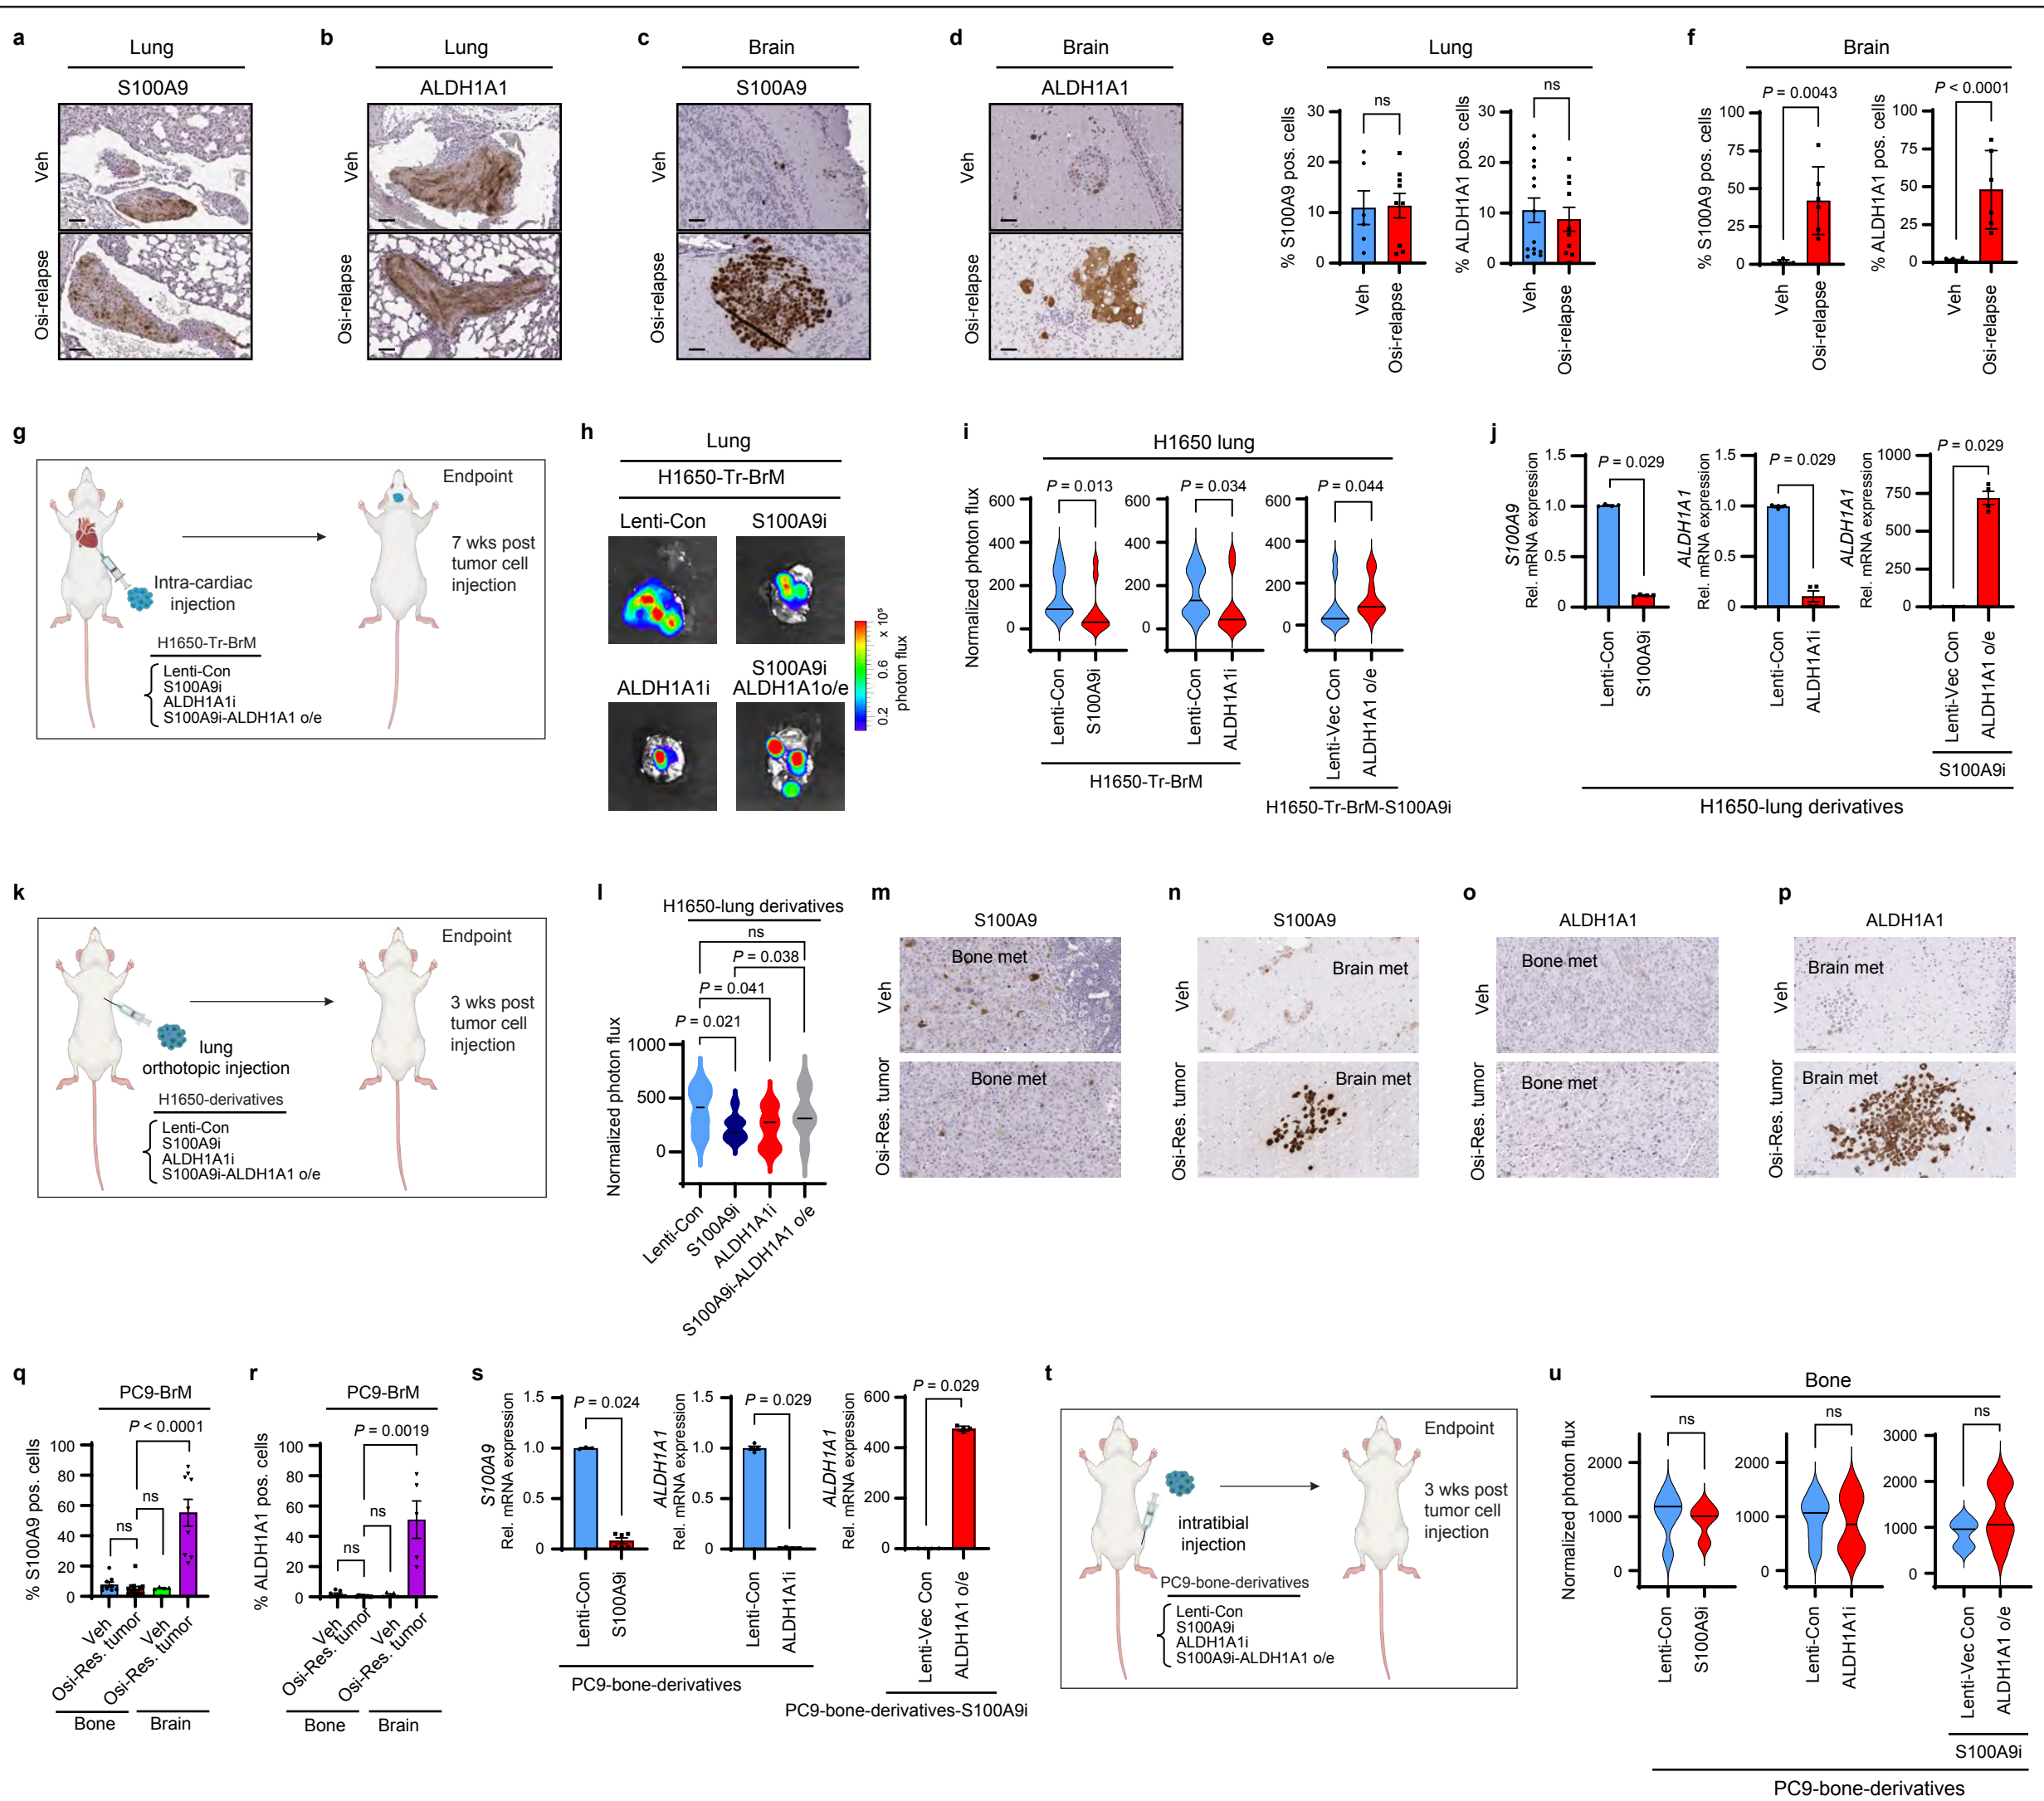

### Supplementary Figure 5. Site-specific effects of the S100A9-ALDH1A1 axis.

(a-f) Immunostaining analysis of S100A9 (a and c) or ALDH1A1 (b and d) on lung (a and b) and brain (c and d) tissue sections from mice injected with H1650-BrM cells and treated with either vehicle (“Veh”, top panels) or upon relapse post osimertinib treatment (“Osi-relapse”, bottom panels). Cells were injected into the arterial circulation of immunodeficient mice via intracardiac injection. After metastatic signal was detected by bioluminescence imaging, treatment was administered at 25 days post tumor-cell injection with either vehicle or osimertinib at 5 mg/kg body weight/day by oral gavage, 5 days per week. Brain and lung tissues were collected at endpoint (2 months for the vehicle group and 4 months post tumor-cell injection for the Osi-relapse group). Scale bars, 50  $\mu$ m. Data are representative of 3 independent experiments.

(e-f) Quantitative analysis of the S100A9- and ALDH1A1-positive cells stained in (a-d). Immunostained sections were counted using the Qu-Path software where positively stained cells were identified by setting a threshold for signal intensity (1+). Data are presented as mean values  $\pm$  SEM. The *p*-value was determined by a two-tailed, unpaired Mann-Whitney test. For S100A9-positive lung lesions: *n* = 6 for Veh, *n* = 9 for Osi-relapse. For ALDH1A1-positive lung lesions: *n* = 14 for Veh, *n* = 10 for Osi-relapse. For S100A9-positive brain lesions: *n* = 5 for Veh, *n* = 6 for Osi-relapse. For ALDH1A1-positive brain lesions: *n* = 15 for Veh, *n* = 6 for Osi-relapse.

(g) Schematic representation of the experimental protocol for injecting H1650-Tr-BrM cells stably expressing either Lenti-Con, S100A9i, or ALDH1A1i guide-RNAs, or S100A9i guide-RNA plus ALDH1A1 o/e, via intracardiac injection. Mice were euthanized at 7 weeks post tumor-cell injection.

(h) *Ex-vivo* photon flux of lungs from mice injected with H1650-Tr-BrM cells expressing either Lenti-Con, S100A9i, ALDH1A1i, or S100A9i plus ALDH1A1 o/e was determined by bioluminescence imaging. Lungs were collected from mice of the indicated groups at 7 weeks post tumor-cell injection. The photon flux scale is indicated on the right side of the image.

(i) Violin plots depicting normalized photon flux of lungs imaged *ex-vivo* from the mice described in panel (h). The normalized photon flux for lung was calculated by dividing the photon flux from lung collected *ex-vivo* by the total photon flux at day 0 (i.e., the day of injection) and multiplying that value by 100. Data are presented as mean values  $\pm$  SEM. *P*-values were determined by a two-tailed, unpaired Mann-Whitney test. Left graph: *n* = 12 for Lenti-Con, *n* = 10 for S100A9i. Middle graph: *n* = 14 for Lenti-Con, *n* = 10 for ALDH1A1i. Right graph: *n* = 10 for S100A9i/Lenti-Vec Con, *n* = 9 for S100A9i/ALDH1A1 o/e.

(j) Expression of S100A9 and ALDH1A1 was determined by qRT-PCR analysis in H1650-lung-derivatives expressing either Lenti-Con or S100A9i guide-RNAs (left most panel), either Lenti-Con or ALDH1A1i guide-RNAs (middle panel), and either S100A9i/Lenti-Vec Con or S100A9i/ALDH1A1 o/e (right panel). GAPDH was used as an internal control. Data are presented as mean values  $\pm$  SEM. The *p*-value was determined by a two-tailed, unpaired Mann-Whitney test: *n* = 4 per group for all panels.

(k) Schematic representation of the experimental protocol for lung orthotopic injections. H1650-Tr-BrM-lung derivatives stably expressing either Lenti-Con, S100A9i, ALDH1A1i, or S100A9i plus ALDH1A1 o/e were injected in the lung (intrathoracic injections, labeled as “lung orthotopic injection” in the figure). Mice were euthanized at 21 days post tumor-cell injection for analysis.

(l) Violin plot depicting normalized photon flux of lungs imaged *ex-vivo* from the experiment described in panel (k). The normalized photon flux for lung was calculated by dividing the photon flux from lung collected *ex-vivo* by the total photon flux at day 0 (i.e., the day of injection) and multiplying that value by 100. Data are presented as mean values  $\pm$  SEM. *P*-values were determined by a two-tailed, unpaired Mann-Whitney test: *n* = 8 for Lenti-Con, *n* = 12 for S100A9i, *n* = 11 for ALDH1A1i and *n* = 7 for S100A9i plus ALDH1A1 o/e.

(m-p) Representative images of bone and brain sections from vehicle- and osimertinib-treated mice that were stained with S100A9 (m-n) or ALDH1A1 antibodies (o-p). PC9-BrM cells were injected into the arterial circulation of immunodeficient mice via intracardiac injection. After metastatic signal was detected by bioluminescence imaging, treatment was administered at 25 days post tumor-cell injection with either vehicle or osimertinib at 5 mg/kg body weight/day by oral gavage, 5 days per week. Brain and lung tissues were collected at endpoint (2 months in the “Veh” group and 5 months post tumor-cell injection in the osimertinib-residual-tumor group (abbreviated as “Osi-Res. tumor”). The images are representative of 10 mice analyzed per group. Scale bars, 50  $\mu$ m (m-o) and 100  $\mu$ m (p).

(q-r) Immunostained images described in panels (m-p) were quantitated using automated Qu-Path software to count S100A9- or ALDH1A1-positive cancer cells that were identified by setting a threshold for signal intensity (1+). Data are presented as mean values  $\pm$  SEM. *P*-values (indicated in the figures) were determined by a two-tailed, unpaired Mann-Whitney test. For S100A9, *n* = 9 for PC9/Bone/Veh metastases, *n* = 13 for PC9/Bone/Osi-Res. tumor metastases. *n* = 4 for PC9/Brain/Veh metastases, and *n* = 9 for PC9/Brain/Osi-Res. tumor metastases. For ALDH1A1, *n* = 7 for PC9/Bone/Veh metastases, *n* = 8 for PC9/Bone/Osi-Res. tumor metastases, *n* = 5 for PC9/Brain/Veh metastases, and *n* = 5 for PC9/Brain/Osi-Res. tumor metastases.

(s) Expression of *S100A9* and *ALDH1A1* was determined by qRT-PCR analysis in PC9-bone-derivative cells stably expressing either Lenti-Con, S100A9i, or ALDH1A1i guide-RNAs, or S100A9i plus either Lenti-Vec Con or ALDH1A1 o/e. GAPDH was used as an internal control. Data are represented as mean values  $\pm$  SEM. The *p*-value was determined by a two-tailed, unpaired Mann-Whitney test. Left graph: *n* = 3 for Lenti-Con, *n* = 6 for S100A9i. Middle graph: *n* = 4 for Lenti-Con, *n* = 4 for ALDH1A1i. Right graph: *n* = 4 for S100A9i plus Lenti-Vec Con, *n* = 4 for S100A9i plus ALDH1A1 o/e.

(t) Schematic representation of the experimental protocol for intratibial injections of PC9-Tr-BrM-bone derivative cells stably expressing either Lenti-Con, S100A9i, or ALDH1A1i guide-RNAs, or S100A9i plus ALDH1A1 o/e. Mice were euthanized at 21 days post tumor-cell injection.

(u) Violin plots depicting normalized photon flux of bone imaged from the mice described in panel (t). The normalized photon flux for bone was calculated by dividing the photon flux from bone collected *ex-vivo* by the total photon flux at day 0 (i.e., the day of injection) and multiplying that value by 100. Data are presented as mean values  $\pm$  SEM. *P*-values were determined by a two-tailed, unpaired Mann-Whitney test. Left graph: *n* = 5 for Lenti-Con, *n* = 4 for S100A9i. Middle graph: *n* = 5 for Lenti-Con, *n* = 4 for ALDH1A1i. Right graph: *n* = 4 for S100A9i plus Lenti-Vec Con, *n* = 4 for S100A9i plus ALDH1A1 o/e.

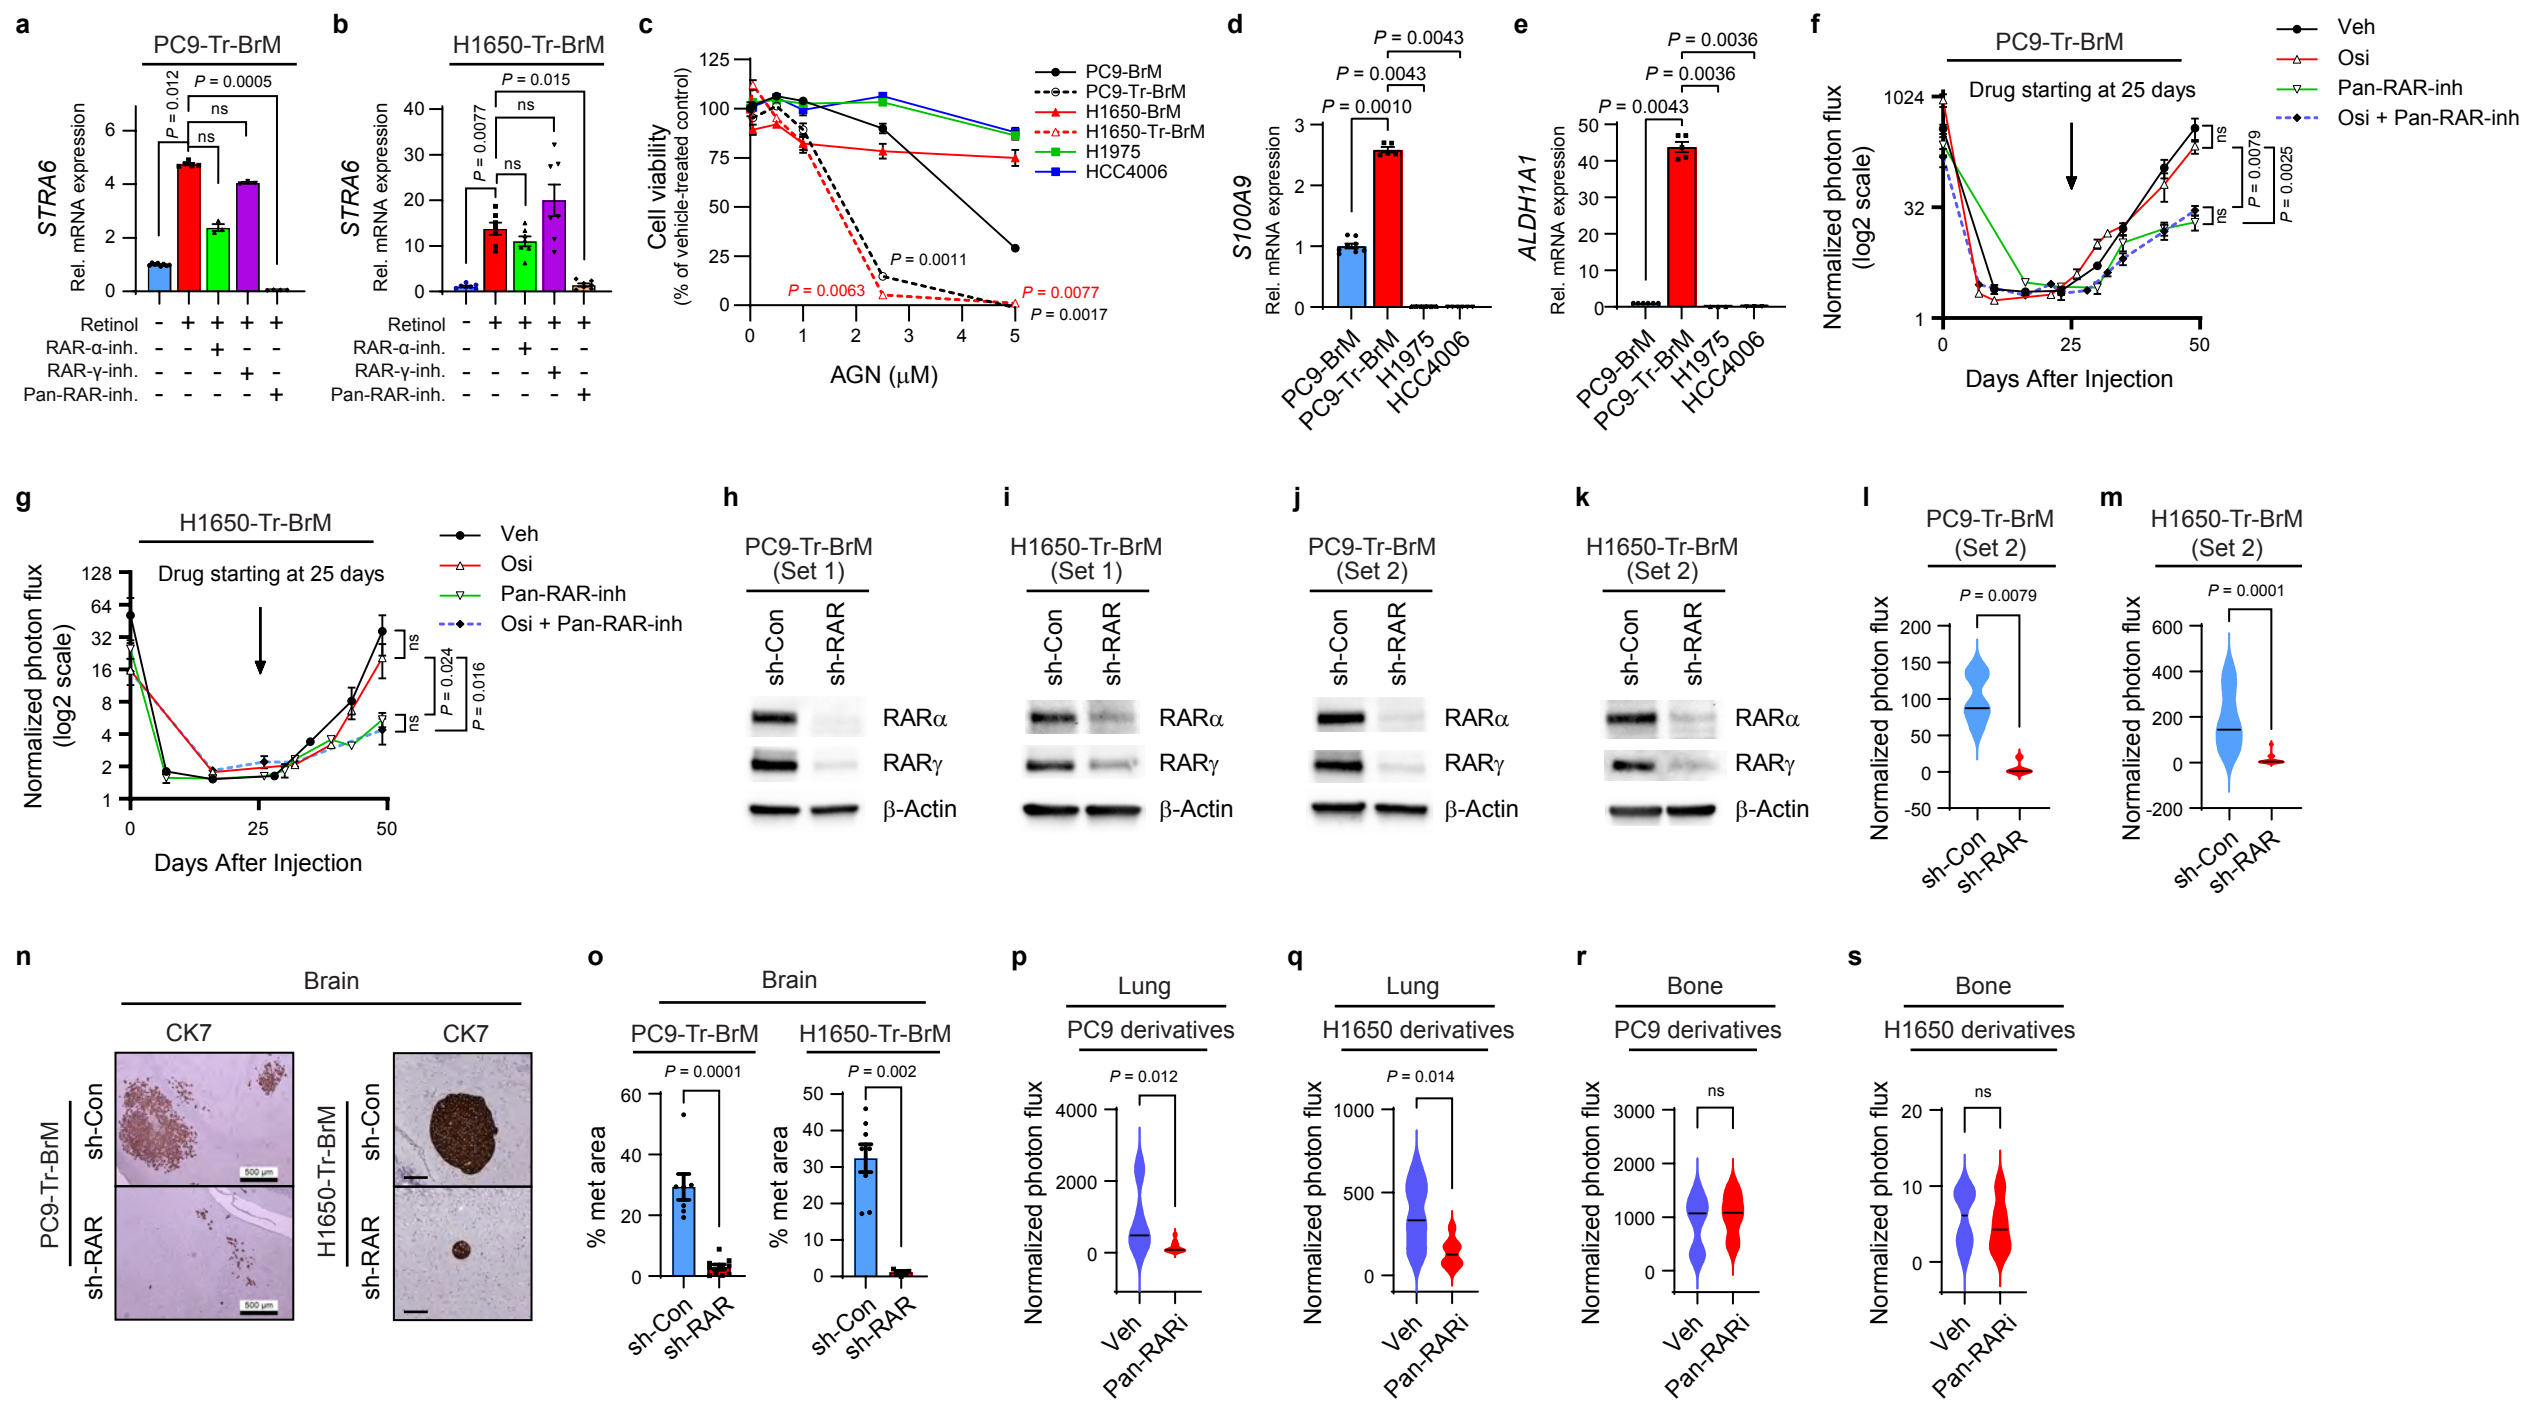



### Supplementary Figure 6. Sensitivity of osimertinib-refractory brain metastases to RAR inhibition

(a-b) *STRA6* expression was determined by qRT-PCR analysis of Tr-BrM cells from the PC9 model (a) and H1650 model (b), which were treated with either DMSO, retinol or retinol plus different retinoic acid receptor antagonists. Cells were cultured for two days in serum-free RPMI medium with DMSO alone, with 5  $\mu$ M retinol alone, or medium with both 5  $\mu$ M retinol and 5  $\mu$ M antagonists (either the RAR- $\alpha$  antagonist BMS-195614, the RAR- $\gamma$  antagonist MM-11253, or the pan-RAR antagonist AGN-194310). After two days of culturing, cells were washed and collected for RNA analysis. GAPDH was measured as an internal control. Data are presented as mean values  $\pm$  SEM. *P*-values were determined by the Kruskal-Wallis test. For the PC9 model (a), *n* = 8 for vehicle; *n* = 5 for retinol; *n* = 3 for retinol plus the RAR- $\alpha$  inhibitor (“RAR- $\alpha$ -inh.”); *n* = 3 for retinol plus the RAR- $\gamma$  inhibitor (“RAR- $\gamma$ -inh.”); *n* = 4 for retinol plus the pan-RAR inhibitor (“pan-RAR-inh.”). For the H1650 model (b), *n* = 7 for all groups.

c) Cell viability assay for comparing *in-vitro* sensitivity of the indicated cell lines to pan-RAR-inhibition (AGN-194310, abbreviated as “AGN”). Cell viability values are normalized to the vehicle (DMSO)-treated control, presented as the mean values  $\pm$  SEM, and representative of three independent experiments. *P*-values were determined by two-way ANOVA with Tukey’s test.

(d-e) *S100A9* (d) and *ALDH1A1* (e) expression was determined by qRT-PCR analysis in the indicated cell lines. PC9-Tr-BrM cells were used as a positive control, and all cell lines were normalized to PC9-BrM. GAPDH was used as an internal control. Data are presented as mean values  $\pm$  SEM. Data are representative of three independent experiments. The *p*-value was determined by a two-tailed, unpaired Mann-Whitney test. For (d), *n* = 9, 5, 6 and 6 for PC9-BrM, PC9-Tr-BrM, H1975 and HCC4006 respectively. For (e), *n* = 6, 5, 3 and 3 for PC9-BrM, PC9-Tr-BrM, H1975 and HCC4006, respectively.

(f-g) Quantitation of photon flux (normalized to the initial day of injection) of brain by longitudinal imaging in mice injected with either PC9-Tr-BrM (f) or H1650-Tr-BrM (g) via intracardiac injections. At 25 days post tumor-cell injection after confirmation of metastatic signal, mice were administered long-term treatment with either 1) vehicle (“Veh”), 2) osimertinib (“Osi”, 5 mg/kg body weight/day), 3) AGN194310 (“Pan-RAR-inh”, 0.5 mg/kg body weight/day), or 4) osimertinib (5 mg/kg body weight/day) plus AGN194310 (0.5 mg/kg body weight/day) by oral gavage, 5 days per week, until the endpoint (7 weeks post tumor-cell injection). For panel (f): *n* = 5 for Veh, *n* = 5 for Osi, *n* = 7 for Pan-RAR-inh, and *n* = 5 for Osi plus Pan-RAR-inh. For panel (g), *n* = 5 for Veh, *n* = 4 for Osi, *n* = 7 for Pan-RAR-inh, and *n* = 8 for Osi plus Pan-RAR-inh. *P*-values were determined by the Kruskal-Wallis test for both (f) and (g).

(h-i) Immunoblot analysis of RAR $\alpha$  and RAR $\gamma$  expression in PC9-Tr-BrM (h) and H1650-Tr-BrM (i) cells stably transduced with shRNA set #1 expressing either control shRNA (“sh-Con”) or shRAR $\alpha$  plus shRAR $\gamma$  (“sh-RAR”) using antibodies against RAR $\alpha$ , RAR $\gamma$  and  $\beta$ -actin (loading control). The immunoblot image is representative of three independent experiments.

(j-k) Immunoblot analysis of RAR $\alpha$  and RAR $\gamma$  expression in PC9-Tr-BrM (j) and h1650-Tr-BrM (k) cells stably transduced with shRNA set #2 expressing either control shRNA (“sh-Con”) or shRAR $\alpha$  plus shRAR $\gamma$  (“sh-

RAR”) using antibodies against RAR $\alpha$ , RAR $\gamma$  and  $\beta$ -actin (loading control). The immunoblot image is representative of three independent experiments.

(l-m) Violin plots depicting normalized photon flux of brain imaged from the mice injected by intracardiac injection with Tr-BrM from the PC9 model (l) or the H1650 model (m) that were stably transduced with shRNA set #2 expressing either control shRNA (“sh-Con”) or shRAR $\alpha$  plus shRAR $\gamma$  (“sh-RAR”). Mice were euthanized at 7 weeks post tumor-cell injection. The normalized photon flux for brain was calculated by dividing the photon flux from brains collected *ex-vivo* by the total photon flux at day 0 (i.e., the day of injection) and multiplying that value by 100. Data are presented as mean values  $\pm$  SEM. *P*-values were determined by a two-tailed, unpaired Mann-Whitney test: n = 5 per group for all groups.

(n) Representative images of CK7 immunohistochemistry in brain sections from mice injected with either PC9-Tr-BrM sh-Con (left-upper panel), PC9-Tr-BrM sh-RAR (Set 2, left-lower panel), H1650-Tr-BrM sh-Con (right-upper panel) or H1650-Tr-BrM sh-RAR (Set 2, right-lower panel) described in panels (l-m). Scale bars: 500  $\mu$ m for the PC9 model and 100  $\mu$ m for the H1650 model.

(o) Normalized photon flux of brain from bioluminescence imaging from mice injected with PC9- or H1650-derived Tr-BrM cells stably transduced with shRNA set #2 containing either control shRNA (sh-Con) or shRAR $\alpha$  plus shRAR $\gamma$  (shRAR) described in panels (l-n). The normalized photon flux for brain was calculated by dividing the photon flux from brains collected *ex-vivo* by the total photon flux at day 0 (i.e., the day of injection) and multiplying that value by 100. Data are presented as mean values  $\pm$  SEM. *P*-values were determined by a two-tailed, unpaired Mann-Whitney test. For the PC9 model: n = 7 for sh-Con, and n = 10 for sh-RAR. For the H1650 model, n = 8 for sh-Con and n = 4 for sh-RAR.

(p-q) Violin plots depicting normalized photon flux of lung measured by bioluminescence imaging of mice. Mice were injected with either PC9- or H1650-derivatives directly into the lung (intrathoracic injections as depicted in Suppl. Fig. 5k) and treated with either vehicle or pan-RAR inhibitor AGN194310 (“Pan-RARi”) for 2 weeks. The normalized photon flux for lung was calculated by dividing the photon flux from lung collected at endpoint (3 weeks post tumor-cell injection) *ex vivo* by the total photon flux at day 0 (i.e., the day of injection) and multiplying that value by 100. Data are presented as mean values  $\pm$  SEM. *P*-values were determined by a two-tailed, unpaired Mann-Whitney test. For panel (p): n = 8 for Veh, and n = 11 for Pan-RARi. For panel (q): n = 7 for Veh, and n = 8 for Pan-RARi.

(r-s) Violin plots depicting normalized photon flux of bone measured by bioluminescence imaging of mice. Mice were injected with either PC9- or H1650-derivatives directly into the tibia bone as depicted in Suppl. Fig. 5t) and treated with either vehicle or AGN194310 (“Pan-RARi”) for 2 weeks. The normalized photon flux for bone was calculated by dividing the photon flux from bone collected at endpoint (3 weeks post tumor-cell injection) *ex vivo* by the total photon flux at day 0 (i.e., the day of injection) and multiplying that value by 100. Data are presented as mean values  $\pm$  SEM. *P*-values were determined by a two-tailed, unpaired Mann-Whitney test. For panel (r), n = 6 for Veh, and n = 4 for Pan-RARi. For panel (s), n = 6 for Veh, and n = 5 for Pan-RARi.

**Supplementary Table 1**

| <b>Accession</b> | <b>Gene</b> | <b>Tr-BrM/BrM<br/>(PC9)</b> | <b>P_Value</b> | <b>Bonf_P</b> |
|------------------|-------------|-----------------------------|----------------|---------------|
| NP_001306126.1   | S100A8      | 19.24                       | 1.43E-05       | 8.31E-03      |
| NP_002956.1      | S100A9      | 16.09                       | 2.53E-05       | 1.47E-02      |
| XP_005262724.1   | UGDH        | 0.39                        | 2.03E-04       | 1.18E-01      |
| NP_001020365.1   | CES1        | 39.10                       | 3.77E-04       | 2.19E-01      |
| NP_002296.1      | LGALS1      | 0.49                        | 4.08E-04       | 2.37E-01      |
| NP_001186652.1   | CRABP2      | 2.80                        | 8.05E-04       | 4.68E-01      |
| NP_001145.1      | ANXA5       | 0.85                        | 1.11E-03       | 6.44E-01      |
| NP_001240837.1   | AKR1C3      | 0.59                        | 1.18E-03       | 6.87E-01      |
| NP_000413.1      | KRT17       | 25.00                       | 1.34E-03       | 7.78E-01      |
| NP_005737.1      | NAMPT       | 1.64                        | 1.60E-03       | 9.32E-01      |
| NP_001304700.1   | RPL8        | 0.82                        | 1.78E-03       | 1.00E+00      |
| NP_001248374.1   | TXNRD1      | 1.21                        | 2.08E-03       | 1.00E+00      |
| NP_000691.1      | ANXA1       | 1.42                        | 2.97E-03       | 1.00E+00      |
| XP_024304747.1   | ARHGDI1     | 3.23                        | 3.24E-03       | 1.00E+00      |
| NP_005013.1      | PFN1        | 0.80                        | 3.60E-03       | 1.00E+00      |
| NP_002620.1      | PGAM1       | 0.60                        | 4.21E-03       | 1.00E+00      |
| NP_001484.1      | GDI1        | 0.63                        | 4.34E-03       | 1.00E+00      |
| NP_001619.1      | AKR1B1      | 1.35                        | 4.38E-03       | 1.00E+00      |
| NP_001203.1      | C1QBP       | 0.66                        | 4.59E-03       | 1.00E+00      |
| NP_000843.1      | GSTP1       | 0.69                        | 4.67E-03       | 1.00E+00      |
| NP_001395.1      | EEF1G       | 1.24                        | 4.79E-03       | 1.00E+00      |
| NP_001924.2      | DLST        | 0.73                        | 6.18E-03       | 1.00E+00      |
| P02769.4         | NA          | 0.37                        | 6.34E-03       | 1.00E+00      |
| NP_001309997.1   | PFKP        | 0.63                        | 6.52E-03       | 1.00E+00      |
| NP_919415.2      | VAPA        | 1.63                        | 6.56E-03       | 1.00E+00      |
| XP_005269798.1   | ANXA11      | 1.52                        | 7.47E-03       | 1.00E+00      |
| NP_001814.2      | CKB         | 2.00                        | 8.05E-03       | 1.00E+00      |
| NP_001949.1      | EEF1A2      | 0.81                        | 8.32E-03       | 1.00E+00      |
| NP_002583.1      | PCNA        | 0.66                        | 9.38E-03       | 1.00E+00      |
| NP_005130.1      | ANXA3       | 1.56                        | 9.51E-03       | 1.00E+00      |
| XP_011509690.1   | PPP1R7      | 1.28                        | 1.06E-02       | 1.00E+00      |
| NP_002559.2      | PABPC1      | 1.22                        | 1.21E-02       | 1.00E+00      |
| NP_004172.2      | UCHL1       | 0.47                        | 1.52E-02       | 1.00E+00      |

**Supplementary Table 1**

|                |         |      |          |          |
|----------------|---------|------|----------|----------|
| NP_006364.2    | VAT1    | 0.77 | 1.54E-02 | 1.00E+00 |
| NP_001025180.1 | RPS15A  | 1.23 | 1.59E-02 | 1.00E+00 |
| NP_001019637.1 | SOD2    | 2.81 | 1.70E-02 | 1.00E+00 |
| NP_006182.2    | PA2G4   | 0.87 | 1.91E-02 | 1.00E+00 |
| NP_006139.1    | LASP1   | 0.74 | 1.95E-02 | 1.00E+00 |
| NP_006089.1    | RACK1   | 1.17 | 1.98E-02 | 1.00E+00 |
| NP_001071634.1 | SRSF1   | 1.19 | 2.01E-02 | 1.00E+00 |
| NP_001311231.1 | RPN2    | 1.15 | 2.14E-02 | 1.00E+00 |
| NP_001447.2    | FLNA    | 0.83 | 2.18E-02 | 1.00E+00 |
| NP_004902.1    | PDIA4   | 1.19 | 2.29E-02 | 1.00E+00 |
| NP_065843.3    | NCEH1   | 1.34 | 2.36E-02 | 1.00E+00 |
| XP_016860272.1 | STAT1   | 1.86 | 2.38E-02 | 1.00E+00 |
| NP_002795.2    | PSMC3   | 0.73 | 2.40E-02 | 1.00E+00 |
| NP_002435.1    | MSN     | 2.50 | 2.45E-02 | 1.00E+00 |
| NP_001311151.1 | HMGCS1  | 1.56 | 2.45E-02 | 1.00E+00 |
| NP_000414.2    | KRT2    | 0.52 | 2.48E-02 | 1.00E+00 |
| NP_001167554.1 | NLRP2   | 1.54 | 2.62E-02 | 1.00E+00 |
| NP_005338.1    | HSPA5   | 1.33 | 2.64E-02 | 1.00E+00 |
| NP_114366.1    | PCBP2   | 0.92 | 2.82E-02 | 1.00E+00 |
| NP_001952.1    | EEF2    | 1.14 | 2.86E-02 | 1.00E+00 |
| NP_001138303.1 | PHB2    | 1.83 | 2.88E-02 | 1.00E+00 |
| NP_000684.2    | ALDH1A3 | 1.28 | 2.98E-02 | 1.00E+00 |
| NP_001258978.1 | TRAP1   | 0.75 | 3.01E-02 | 1.00E+00 |
| NP_001317687.1 | SDHA    | 0.70 | 3.01E-02 | 1.00E+00 |
| NP_001280134.1 | MVP     | 1.22 | 3.05E-02 | 1.00E+00 |
| XP_016882899.1 | KHSRP   | 1.33 | 3.11E-02 | 1.00E+00 |
| NP_004452.1    | FARSA   | 1.32 | 3.20E-02 | 1.00E+00 |
| NP_060225.4    | NSUN2   | 1.39 | 3.22E-02 | 1.00E+00 |
| NP_001341087.1 | ACSL3   | 1.08 | 3.31E-02 | 1.00E+00 |
| NP_057417.3    | SRRM2   | 1.25 | 3.34E-02 | 1.00E+00 |
| NP_002941.1    | RPN1    | 0.76 | 3.40E-02 | 1.00E+00 |
| NP_001273066.1 | NQO1    | 1.16 | 3.52E-02 | 1.00E+00 |

**Supplementary Table 1**

|                |           |      |          |          |
|----------------|-----------|------|----------|----------|
| NP_005558.1    | LGALS3BP  | 0.72 | 3.61E-02 | 1.00E+00 |
| NP_112243.1    | RAB1B     | 0.75 | 3.78E-02 | 1.00E+00 |
| NP_114368.1    | PTBP1     | 1.38 | 4.00E-02 | 1.00E+00 |
| NP_002005.1    | FKBP4     | 1.26 | 4.02E-02 | 1.00E+00 |
| NP_817126.1    | ACTL6A    | 0.74 | 4.05E-02 | 1.00E+00 |
| NP_002884.1    | RBBP7     | 1.22 | 4.10E-02 | 1.00E+00 |
| NP_001393.1    | EEF1A1    | 1.13 | 4.12E-02 | 1.00E+00 |
| XP_016861880.1 | MAP4      | 0.87 | 4.20E-02 | 1.00E+00 |
| XP_016883446.1 | NSFL1C    | 0.56 | 4.44E-02 | 1.00E+00 |
| NP_938148.1    | GANAB     | 0.77 | 4.52E-02 | 1.00E+00 |
| NP_060810.2    | CPPED1    | 1.30 | 4.64E-02 | 1.00E+00 |
| NP_004095.4    | FASN      | 0.71 | 4.73E-02 | 1.00E+00 |
| NP_006614.2    | PHGDH     | 0.73 | 4.85E-02 | 1.00E+00 |
| NP_000933.1    | PPIB      | 1.30 | 5.06E-02 | 1.00E+00 |
| NP_001531.1    | HSPB1     | 1.26 | 5.08E-02 | 1.00E+00 |
| NP_001269530.1 | PTGES3    | 0.75 | 5.20E-02 | 1.00E+00 |
| NP_001350928.1 | CANX      | 1.13 | 5.36E-02 | 1.00E+00 |
| NP_859048.1    | PRDX1     | 1.22 | 5.39E-02 | 1.00E+00 |
| NP_001245366.1 | TARS      | 0.80 | 5.40E-02 | 1.00E+00 |
| NP_006818.3    | TMED10    | 0.65 | 5.53E-02 | 1.00E+00 |
| NP_001157791.1 | FLNB      | 1.25 | 5.58E-02 | 1.00E+00 |
| NP_002783.1    | PSMA7     | 0.84 | 5.83E-02 | 1.00E+00 |
| NP_001000.2    | RPS5      | 0.81 | 5.93E-02 | 1.00E+00 |
| NP_001016.1    | RPS23     | 0.87 | 6.06E-02 | 1.00E+00 |
| XP_011543870.1 | SMS       | 1.18 | 6.10E-02 | 1.00E+00 |
| NP_002874.1    | RANGAP1   | 1.42 | 6.30E-02 | 1.00E+00 |
| NP_001307662.1 | CAPG      | 1.64 | 6.33E-02 | 1.00E+00 |
| NP_001018146.1 | NME1-NME2 | 1.13 | 6.50E-02 | 1.00E+00 |
| NP_066952.1    | PPA1      | 1.18 | 6.67E-02 | 1.00E+00 |
| NP_004334.1    | CALR      | 1.16 | 6.84E-02 | 1.00E+00 |
| NP_001030168.1 | RPL14     | 0.64 | 6.85E-02 | 1.00E+00 |
| NP_004035.2    | ATIC      | 1.44 | 6.86E-02 | 1.00E+00 |
| NP_002788.1    | PSMB5     | 0.59 | 6.89E-02 | 1.00E+00 |
| NP_006112.3    | KRT1      | 0.56 | 7.07E-02 | 1.00E+00 |
| NP_001137153.1 | GSTK1     | 1.39 | 7.41E-02 | 1.00E+00 |

**Supplementary Table 1**

|                |         |      |          |          |
|----------------|---------|------|----------|----------|
| 1              |         |      |          |          |
| XP_011516716.1 | FAM120A | 0.34 | 7.48E-02 | 1.00E+00 |
| NP_003698.1    | RUVBL1  | 0.76 | 7.53E-02 | 1.00E+00 |
| NP_003741.1    | EIF3A   | 1.21 | 7.66E-02 | 1.00E+00 |
| NP_001294853.1 | NAP1L1  | 0.85 | 7.93E-02 | 1.00E+00 |
| XP_006718014.1 | ANXA8   | 0.89 | 8.03E-02 | 1.00E+00 |
| NP_003290.1    | HSP90B1 | 0.90 | 8.08E-02 | 1.00E+00 |
| NP_055399.1    | ERO1A   | 1.19 | 8.10E-02 | 1.00E+00 |
| XP_006715749.1 | GARS    | 0.57 | 8.14E-02 | 1.00E+00 |
| NP_001186731.1 | RPL11   | 0.80 | 8.25E-02 | 1.00E+00 |
| NP_001739.2    | CAPN2   | 1.32 | 8.32E-02 | 1.00E+00 |
| NP_001184222.1 | DPYSL2  | 0.58 | 8.46E-02 | 1.00E+00 |
| XP_005258899.1 | PRMT1   | 1.21 | 8.66E-02 | 1.00E+00 |
| NP_001018078.1 | SERBP1  | 0.90 | 8.67E-02 | 1.00E+00 |
| NP_005971.1    | S100P   | 1.47 | 8.71E-02 | 1.00E+00 |
| NP_036220.1    | PGLS    | 1.26 | 8.72E-02 | 1.00E+00 |
| NP_001002857.1 | ANXA2   | 1.15 | 8.82E-02 | 1.00E+00 |
| NP_001186272.1 | RPL17   | 1.18 | 8.84E-02 | 1.00E+00 |
| NP_001186170.1 | KYNU    | 1.22 | 8.85E-02 | 1.00E+00 |
| NP_003644.2    | COPS3   | 1.19 | 8.99E-02 | 1.00E+00 |
| NP_000969.1    | RPL23   | 0.92 | 9.02E-02 | 1.00E+00 |
| NP_001389.2    | ECH1    | 0.75 | 9.03E-02 | 1.00E+00 |
| NP_002127.1    | HNRNPA1 | 1.39 | 9.03E-02 | 1.00E+00 |
| NP_009140.1    | RPL35   | 0.92 | 9.05E-02 | 1.00E+00 |
| NP_003079.1    | FSCN1   | 0.92 | 9.11E-02 | 1.00E+00 |
| NP_003891.1    | SQSTM1  | 0.89 | 9.14E-02 | 1.00E+00 |
| NP_036457.1    | MAPRE1  | 0.86 | 9.26E-02 | 1.00E+00 |
| NP_001257356.1 | PSMD5   | 1.41 | 9.47E-02 | 1.00E+00 |
| NP_001309899.1 | OAT     | 1.22 | 9.51E-02 | 1.00E+00 |
| XP_011525623.1 | MYH14   | 1.35 | 9.56E-02 | 1.00E+00 |
| XP_024305110.1 | HMGB1   | 0.85 | 9.61E-02 | 1.00E+00 |
| XP_005273783.1 | SF3B2   | 0.91 | 9.83E-02 | 1.00E+00 |
| NP_006316.1    | RAN     | 0.86 | 9.95E-02 | 1.00E+00 |
| NP_001289976.1 | MYL12A  | 0.78 | 1.01E-01 | 1.00E+00 |

**Supplementary Table 1**

|                |           |      |          |          |
|----------------|-----------|------|----------|----------|
| 1              |           |      |          |          |
| NP_000963.1    | RPL7A     | 0.79 | 1.02E-01 | 1.00E+00 |
| NP_001349646.1 | BZW2      | 0.65 | 1.03E-01 | 1.00E+00 |
| NP_061819.2    | NANS      | 1.38 | 1.04E-01 | 1.00E+00 |
| NP_003279.2    | TPD52L2   | 0.61 | 1.06E-01 | 1.00E+00 |
| XP_005272257.1 | ASS1      | 1.56 | 1.06E-01 | 1.00E+00 |
| NP_001753.1    | CCT6A     | 0.84 | 1.08E-01 | 1.00E+00 |
| NP_004512.1    | KIF5B     | 0.78 | 1.09E-01 | 1.00E+00 |
| NP_001182356.1 | SRSF2     | 1.36 | 1.09E-01 | 1.00E+00 |
| NP_002794.1    | PSMC2     | 0.91 | 1.12E-01 | 1.00E+00 |
| NP_005337.2    | HSPA1B    | 0.75 | 1.15E-01 | 1.00E+00 |
| NP_006392.1    | ANP32B    | 1.09 | 1.16E-01 | 1.00E+00 |
| NP_000282.1    | PGK1      | 0.91 | 1.16E-01 | 1.00E+00 |
| NP_001099000.1 | CAP1      | 1.89 | 1.17E-01 | 1.00E+00 |
| NP_057392.1    | CMPK1     | 1.11 | 1.20E-01 | 1.00E+00 |
| NP_004085.1    | EIF2S1    | 1.26 | 1.22E-01 | 1.00E+00 |
| NP_001961.1    | EIF5A     | 0.78 | 1.22E-01 | 1.00E+00 |
| NP_001257419.1 | RPL18     | 0.56 | 1.25E-01 | 1.00E+00 |
| NP_000217.2    | KRT9      | 0.72 | 1.26E-01 | 1.00E+00 |
| NP_005989.3    | CCT3      | 0.82 | 1.27E-01 | 1.00E+00 |
| NP_004437.2    | EPRS      | 1.17 | 1.27E-01 | 1.00E+00 |
| NP_612510.1    | TECR      | 0.77 | 1.27E-01 | 1.00E+00 |
| NP_057018.1    | NOP58     | 1.40 | 1.28E-01 | 1.00E+00 |
| XP_011512637.1 | SERPINB1  | 1.34 | 1.28E-01 | 1.00E+00 |
| NP_000973.2    | RPL21     | 1.98 | 1.28E-01 | 1.00E+00 |
| NP_002120.1    | HMGB2     | 1.31 | 1.33E-01 | 1.00E+00 |
| NP_001310246.1 | TGM2      | 0.82 | 1.33E-01 | 1.00E+00 |
| NP_073744.2    | FAM129B   | 1.44 | 1.37E-01 | 1.00E+00 |
| NP_001269634.1 | PDIA6     | 1.12 | 1.39E-01 | 1.00E+00 |
| NP_003225.2    | TFRC      | 0.85 | 1.39E-01 | 1.00E+00 |
| NP_001243222.1 | KRT8      | 1.14 | 1.40E-01 | 1.00E+00 |
| NP_066406.1    | HIST1H2BB | 1.13 | 1.43E-01 | 1.00E+00 |
| NP_003396.1    | YWHAH     | 0.64 | 1.44E-01 | 1.00E+00 |
| NP_002291.1    | LDHB      | 0.86 | 1.44E-01 | 1.00E+00 |
| NP_001243599.  | DPP3      | 1.32 | 1.45E-01 | 1.00E+00 |

**Supplementary Table 1**

|                |                |      |          |          |
|----------------|----------------|------|----------|----------|
| 1              |                |      |          |          |
| NP_005808.3    | PLIN3          | 1.22 | 1.45E-01 | 1.00E+00 |
| XP_016873735.1 | SF1            | 1.25 | 1.46E-01 | 1.00E+00 |
| XP_011543041.1 | EHD1           | 1.31 | 1.46E-01 | 1.00E+00 |
| NP_003395.1    | YWHAB          | 1.20 | 1.46E-01 | 1.00E+00 |
| NP_066565.1    | NMT1           | 0.91 | 1.46E-01 | 1.00E+00 |
| NP_002809.2    | PSME2          | 1.40 | 1.47E-01 | 1.00E+00 |
| NP_001276675.1 | GAPDH          | 0.88 | 1.48E-01 | 1.00E+00 |
| NP_005800.3    | PRDX2          | 0.91 | 1.49E-01 | 1.00E+00 |
| NP_000412.3    | KRT10          | 0.56 | 1.52E-01 | 1.00E+00 |
| XP_016875852.1 | HSPH1          | 0.86 | 1.53E-01 | 1.00E+00 |
| NP_001129126.1 | PABPC4         | 1.27 | 1.54E-01 | 1.00E+00 |
| NP_001186883.1 | ACTG1          | 1.16 | 1.54E-01 | 1.00E+00 |
| NP_001104547.1 | EZR            | 0.83 | 1.54E-01 | 1.00E+00 |
| NP_002793.2    | PSMC1          | 0.90 | 1.55E-01 | 1.00E+00 |
| NP_003364.1    | VCL            | 0.79 | 1.58E-01 | 1.00E+00 |
| XP_016870157.1 | HNRNPK         | 1.09 | 1.58E-01 | 1.00E+00 |
| NP_001677.2    | ATP5F1B        | 0.93 | 1.59E-01 | 1.00E+00 |
| NP_004896.1    | PRDX6          | 1.29 | 1.59E-01 | 1.00E+00 |
| XP_011512976.1 | SERPINB6       | 0.88 | 1.60E-01 | 1.00E+00 |
| NP_001025189.1 | APRT           | 1.22 | 1.61E-01 | 1.00E+00 |
| NP_463460.1    | FKBP1A         | 0.77 | 1.62E-01 | 1.00E+00 |
| NP_006187.2    | PCBP1          | 0.90 | 1.62E-01 | 1.00E+00 |
| NP_001096137.1 | PSMA4          | 0.83 | 1.63E-01 | 1.00E+00 |
| NP_001265568.1 | RANBP1         | 1.14 | 1.65E-01 | 1.00E+00 |
| NP_004506.2    | ILF2           | 1.15 | 1.65E-01 | 1.00E+00 |
| XP_016856353.1 | TARDBP         | 1.22 | 1.66E-01 | 1.00E+00 |
| NP_006045.1    | RTN3           | 1.28 | 1.66E-01 | 1.00E+00 |
| NP_001288160.1 | HMGB3          | 0.93 | 1.69E-01 | 1.00E+00 |
| NP_055040.2    | PPP2R1A        | 1.06 | 1.69E-01 | 1.00E+00 |
| NP_954673.1    | TMEM189-UBE2V1 | 0.74 | 1.69E-01 | 1.00E+00 |
| NP_001300874.1 | RHOA           | 1.10 | 1.71E-01 | 1.00E+00 |
| NP_002009.1    | FLII           | 1.43 | 1.72E-01 | 1.00E+00 |
| NP_003320.2    | TXN            | 1.07 | 1.74E-01 | 1.00E+00 |



**Supplementary Table 1**

|                |        |      |          |          |
|----------------|--------|------|----------|----------|
| NP_005780.2    | PSME3  | 1.20 | 1.78E-01 | 1.00E+00 |
| NP_005947.3    | MTHFD1 | 0.84 | 1.79E-01 | 1.00E+00 |
| XP_016885270.1 | UBA1   | 0.87 | 1.80E-01 | 1.00E+00 |
| NP_001290553.1 | RPL10  | 0.92 | 1.81E-01 | 1.00E+00 |
| XP_016871560.1 | GDI2   | 0.76 | 1.81E-01 | 1.00E+00 |
| NP_579899.1    | MYOF   | 0.83 | 1.83E-01 | 1.00E+00 |
| NP_005547.3    | KRT7   | 1.09 | 1.87E-01 | 1.00E+00 |
| NP_002071.2    | GOT2   | 1.14 | 1.89E-01 | 1.00E+00 |
| NP_000977.1    | RPL24  | 1.52 | 1.92E-01 | 1.00E+00 |
| NP_001230829.1 | HDLBP  | 0.82 | 1.93E-01 | 1.00E+00 |
| NP_000993.1    | RPLP0  | 0.89 | 1.95E-01 | 1.00E+00 |
| XP_024309321.1 | CTPS1  | 1.41 | 1.95E-01 | 1.00E+00 |
| NP_852133.1    | EIF6   | 0.86 | 1.95E-01 | 1.00E+00 |
| NP_001001.2    | RPS6   | 0.92 | 1.95E-01 | 1.00E+00 |
| NP_005557.1    | LDHA   | 0.85 | 1.97E-01 | 1.00E+00 |
| XP_011541100.1 | HSPA8  | 0.92 | 1.98E-01 | 1.00E+00 |
| NP_006397.1    | PRDX4  | 1.28 | 1.98E-01 | 1.00E+00 |
| NP_001020092.1 | RPL9   | 1.36 | 1.99E-01 | 1.00E+00 |
| NP_003118.2    | SPTAN1 | 1.29 | 1.99E-01 | 1.00E+00 |
| NP_000995.1    | RPLP2  | 0.83 | 2.00E-01 | 1.00E+00 |
| XP_016880177.1 | ACLY   | 1.23 | 2.01E-01 | 1.00E+00 |
| NP_002797.3    | PSMC6  | 0.86 | 2.04E-01 | 1.00E+00 |
| NP_001138881.1 | NONO   | 0.87 | 2.05E-01 | 1.00E+00 |
| NP_001258029.1 | PUF60  | 0.80 | 2.06E-01 | 1.00E+00 |
| NP_003861.1    | IQGAP1 | 1.07 | 2.07E-01 | 1.00E+00 |
| NP_004083.3    | ECHS1  | 0.73 | 2.08E-01 | 1.00E+00 |
| NP_002147.2    | HSPD1  | 0.85 | 2.08E-01 | 1.00E+00 |
| XP_011518559.1 | RNH1   | 1.14 | 2.10E-01 | 1.00E+00 |
| NP_001976.1    | ETFB   | 0.90 | 2.11E-01 | 1.00E+00 |
| NP_000134.2    | FH     | 1.28 | 2.12E-01 | 1.00E+00 |
| NP_002257.1    | KPNA2  | 1.16 | 2.13E-01 | 1.00E+00 |
| NP_000916.2    | PDHB   | 1.32 | 2.13E-01 | 1.00E+00 |
| NP_001307526.1 | DDX5   | 1.19 | 2.15E-01 | 1.00E+00 |
| NP_057071.2    | HEBP1  | 1.23 | 2.16E-01 | 1.00E+00 |
| NP_001345445.1 | PRDX5  | 0.85 | 2.19E-01 | 1.00E+00 |

**Supplementary Table 1**

|                |          |      |          |          |
|----------------|----------|------|----------|----------|
| NP_004930.1    | DDX1     | 0.65 | 2.22E-01 | 1.00E+00 |
| NP_066953.1    | PPIA     | 0.90 | 2.22E-01 | 1.00E+00 |
| NP_001681.2    | ATP6V1A  | 0.90 | 2.23E-01 | 1.00E+00 |
| NP_001019.1    | RPS25    | 1.28 | 2.23E-01 | 1.00E+00 |
| NP_001406.1    | EIF2S3   | 1.12 | 2.25E-01 | 1.00E+00 |
| XP_011507756.1 | HDGF     | 1.12 | 2.25E-01 | 1.00E+00 |
| NP_001120699.1 | CD59     | 1.26 | 2.26E-01 | 1.00E+00 |
| NP_001013269.1 | SLC3A2   | 0.86 | 2.28E-01 | 1.00E+00 |
| NP_006296.1    | ANP32A   | 0.85 | 2.28E-01 | 1.00E+00 |
| NP_006808.1    | ERP29    | 0.78 | 2.30E-01 | 1.00E+00 |
| NP_057535.1    | COPB1    | 1.42 | 2.31E-01 | 1.00E+00 |
| NP_004550.2    | YBX1     | 1.18 | 2.31E-01 | 1.00E+00 |
| NP_002781.2    | PSMA5    | 1.08 | 2.31E-01 | 1.00E+00 |
| NP_000117.1    | ETFA     | 0.88 | 2.32E-01 | 1.00E+00 |
| NP_005713.1    | ACTR2    | 1.12 | 2.33E-01 | 1.00E+00 |
| NP_001289561.1 | CAPNS1   | 0.83 | 2.33E-01 | 1.00E+00 |
| XP_011507516.1 | BROX     | 1.28 | 2.34E-01 | 1.00E+00 |
| NP_001688.1    | ATP5PO   | 0.56 | 2.35E-01 | 1.00E+00 |
| XP_005256841.1 | YWHAE    | 0.84 | 2.37E-01 | 1.00E+00 |
| NP_003530.1    | HIST1H4D | 1.21 | 2.40E-01 | 1.00E+00 |
| NP_002782.1    | PSMA6    | 0.81 | 2.42E-01 | 1.00E+00 |
| NP_001017963.2 | HSP90AA1 | 0.95 | 2.44E-01 | 1.00E+00 |
| NP_150254.1    | RPL13    | 0.88 | 2.44E-01 | 1.00E+00 |
| NP_002625.1    | PHB      | 0.81 | 2.45E-01 | 1.00E+00 |
| NP_006746.1    | TALDO1   | 1.52 | 2.45E-01 | 1.00E+00 |
| NP_001317583.1 | EIF4B    | 0.86 | 2.46E-01 | 1.00E+00 |
| NP_002902.2    | UPF1     | 1.07 | 2.48E-01 | 1.00E+00 |
| NP_036205.1    | CCT5     | 0.87 | 2.48E-01 | 1.00E+00 |
| NP_003281.1    | TPM4     | 1.10 | 2.49E-01 | 1.00E+00 |
| NP_005773.3    | ALYREF   | 0.92 | 2.52E-01 | 1.00E+00 |
| NP_004492.2    | HNRNPU   | 1.30 | 2.52E-01 | 1.00E+00 |
| NP_006383.2    | NOP56    | 1.21 | 2.53E-01 | 1.00E+00 |
| NP_003339.1    | UBE2N    | 0.92 | 2.55E-01 | 1.00E+00 |
| NP_001278904.1 | ETF1     | 1.37 | 2.56E-01 | 1.00E+00 |
| NP_001269315.1 | IDH1     | 0.83 | 2.60E-01 | 1.00E+00 |

**Supplementary Table 1**

|                |         |      |          |          |
|----------------|---------|------|----------|----------|
| NP_444295.1    | UBQLN1  | 0.91 | 2.60E-01 | 1.00E+00 |
| NP_001265481.1 | TUBA4A  | 0.85 | 2.60E-01 | 1.00E+00 |
| NP_036611.2    | YWHAG   | 1.13 | 2.61E-01 | 1.00E+00 |
| NP_004490.2    | HNRNPAB | 1.48 | 2.62E-01 | 1.00E+00 |
| NP_001120668.1 | CNBP    | 0.90 | 2.63E-01 | 1.00E+00 |
| XP_024306305.1 | PRPF8   | 1.31 | 2.65E-01 | 1.00E+00 |
| NP_002778.1    | PSMA2   | 0.84 | 2.68E-01 | 1.00E+00 |
| NP_001139021.1 | TXNDC5  | 0.72 | 2.71E-01 | 1.00E+00 |
| XP_011524712.1 | U2AF2   | 1.69 | 2.71E-01 | 1.00E+00 |
| XP_011541107.1 | IL18    | 3.61 | 2.72E-01 | 1.00E+00 |
| NP_687033.1    | PSMA3   | 0.85 | 2.72E-01 | 1.00E+00 |
| NP_998776.1    | SLC25A3 | 1.52 | 2.73E-01 | 1.00E+00 |
| NP_000975.2    | RPL23A  | 1.09 | 2.74E-01 | 1.00E+00 |
| NP_009207.2    | CBX3    | 1.17 | 2.74E-01 | 1.00E+00 |
| NP_001317129.1 | RPL19   | 0.89 | 2.75E-01 | 1.00E+00 |
| NP_000173.2    | HADHA   | 1.35 | 2.77E-01 | 1.00E+00 |
| NP_001269554.1 | LMNA    | 0.85 | 2.77E-01 | 1.00E+00 |
| NP_005222.2    | CTTN    | 0.85 | 2.78E-01 | 1.00E+00 |
| NP_001951.2    | EEF1D   | 1.08 | 2.78E-01 | 1.00E+00 |
| NP_001853.2    | COX5B   | 0.81 | 2.78E-01 | 1.00E+00 |
| XP_024305474.1 | WARS    | 1.19 | 2.79E-01 | 1.00E+00 |
| XP_005264575.1 | SPTBN1  | 1.08 | 2.79E-01 | 1.00E+00 |
| NP_002943.2    | RPS2    | 1.14 | 2.80E-01 | 1.00E+00 |
| XP_016856845.1 | NASP    | 0.76 | 2.81E-01 | 1.00E+00 |
| NP_002267.2    | KRT19   | 1.30 | 2.86E-01 | 1.00E+00 |
| NP_000185.1    | HPRT1   | 0.77 | 2.89E-01 | 1.00E+00 |
| NP_001276681.1 | DLD     | 1.33 | 2.93E-01 | 1.00E+00 |
| XP_011540695.1 | FUBP1   | 1.12 | 2.93E-01 | 1.00E+00 |
| NP_002706.1    | PPP2CA  | 1.41 | 2.94E-01 | 1.00E+00 |
| NP_000967.1    | RPL12   | 0.90 | 2.95E-01 | 1.00E+00 |
| NP_005331.1    | HINT1   | 1.16 | 2.97E-01 | 1.00E+00 |
| NP_001229602.1 | AHCYL1  | 1.29 | 2.99E-01 | 1.00E+00 |
| NP_000996.2    | RPS3    | 1.10 | 3.00E-01 | 1.00E+00 |
| XP_005263481.1 | PARK7   | 0.89 | 3.01E-01 | 1.00E+00 |
| NP_005177.2    | CAPN1   | 0.88 | 3.03E-01 | 1.00E+00 |

**Supplementary Table 1**

|                |           |       |          |          |
|----------------|-----------|-------|----------|----------|
| NP_006266.2    | SRSF6     | 1.26  | 3.04E-01 | 1.00E+00 |
| NP_001117.2    | ADSS      | 0.92  | 3.07E-01 | 1.00E+00 |
| NP_001129478.1 | GART      | 1.08  | 3.07E-01 | 1.00E+00 |
| NP_006254.1    | PSME1     | 1.37  | 3.08E-01 | 1.00E+00 |
| NP_000997.1    | RPS3A     | 1.05  | 3.09E-01 | 1.00E+00 |
| NP_003510.1    | HIST1H2BL | 1.19  | 3.13E-01 | 1.00E+00 |
| NP_060140.2    | OTUB1     | 1.07  | 3.14E-01 | 1.00E+00 |
| XP_024306727.1 | TAF15     | 0.90  | 3.16E-01 | 1.00E+00 |
| NP_001349.2    | DHX15     | 0.81  | 3.20E-01 | 1.00E+00 |
| NP_958434.1    | CNN2      | 0.73  | 3.21E-01 | 1.00E+00 |
| XP_011512246.1 | SUB1      | 0.94  | 3.25E-01 | 1.00E+00 |
| NP_001341935.1 | NPM1      | 1.14  | 3.25E-01 | 1.00E+00 |
| NP_001229820.1 | CSDE1     | 1.17  | 3.28E-01 | 1.00E+00 |
| NP_002878.2    | RARS      | 1.06  | 3.29E-01 | 1.00E+00 |
| NP_004037.1    | ATP5F1A   | 1.04  | 3.34E-01 | 1.00E+00 |
| NP_000875.2    | IMPDH2    | 0.94  | 3.36E-01 | 1.00E+00 |
| NP_066272.1    | PDLIM1    | 1.12  | 3.36E-01 | 1.00E+00 |
| NP_005498.1    | CFL1      | 0.93  | 3.36E-01 | 1.00E+00 |
| NP_003357.2    | UQCRC2    | 1.12  | 3.36E-01 | 1.00E+00 |
| NP_009109.3    | STRAP     | 1.18  | 3.40E-01 | 1.00E+00 |
| NP_005678.3    | FARSB     | 1.08  | 3.41E-01 | 1.00E+00 |
| XP_016856850.1 | ATP1A1    | 1.18  | 3.44E-01 | 1.00E+00 |
| NP_001008.1    | RPS13     | 0.85  | 3.46E-01 | 1.00E+00 |
| NP_002145.3    | HSPA4     | 1.04  | 3.46E-01 | 1.00E+00 |
| NP_003125.3    | SRP14     | 1.14  | 3.50E-01 | 1.00E+00 |
| NP_001027565.1 | HNRNPH2   | 1.03  | 3.53E-01 | 1.00E+00 |
| NP_001002.1    | RPS7      | 0.94  | 3.53E-01 | 1.00E+00 |
| NP_008996.1    | CDC37     | 0.58  | 3.57E-01 | 1.00E+00 |
| NP_000393.4    | G6PD      | 0.90  | 3.59E-01 | 1.00E+00 |
| NP_055205.2    | SND1      | 1.15  | 3.59E-01 | 1.00E+00 |
| NP_001672.1    | ATP2A2    | 1.32  | 3.59E-01 | 1.00E+00 |
| NP_000678.1    | AHCY      | 0.81  | 3.61E-01 | 1.00E+00 |
| NP_001226.2    | SERPINH1  | 1.08  | 3.61E-01 | 1.00E+00 |
| NP_064601.3    | RNPEP     | 0.90  | 3.66E-01 | 1.00E+00 |
| NP_001333694.1 | MYO18A    | 25.00 | 3.74E-01 | 1.00E+00 |
| NP_001143.2    | SLC25A5   | 1.11  | 3.74E-01 | 1.00E+00 |

**Supplementary Table 1**

|                |          |      |          |          |
|----------------|----------|------|----------|----------|
| NP_054733.2    | SNRNP200 | 0.80 | 3.77E-01 | 1.00E+00 |
| NP_055121.1    | RTCB     | 0.86 | 3.77E-01 | 1.00E+00 |
| XP_024304324.1 | NUMA1    | 0.77 | 3.78E-01 | 1.00E+00 |
| XP_011518787.1 | CD44     | 1.17 | 3.78E-01 | 1.00E+00 |
| NP_001269267.1 | PLS3     | 1.09 | 3.80E-01 | 1.00E+00 |
| NP_112480.2    | HNRNPM   | 1.16 | 3.82E-01 | 1.00E+00 |
| NP_002806.2    | PSMD11   | 1.10 | 3.86E-01 | 1.00E+00 |
| NP_065393.1    | RTN4     | 1.14 | 3.88E-01 | 1.00E+00 |
| NP_008839.2    | RAC1     | 0.92 | 3.91E-01 | 1.00E+00 |
| NP_003472.2    | USP5     | 0.85 | 3.93E-01 | 1.00E+00 |
| XP_011526434.1 | PRKCSH   | 0.92 | 3.94E-01 | 1.00E+00 |
| XP_024307741.1 | STAU1    | 0.86 | 3.97E-01 | 1.00E+00 |
| NP_004850.1    | CLTC     | 1.11 | 3.98E-01 | 1.00E+00 |
| NP_060676.2    | VPS35    | 1.06 | 3.99E-01 | 1.00E+00 |
| NP_002297.2    | LGALS3   | 1.05 | 4.04E-01 | 1.00E+00 |
| NP_000960.2    | RPL5     | 0.90 | 4.04E-01 | 1.00E+00 |
| NP_005304.3    | PDIA3    | 0.94 | 4.06E-01 | 1.00E+00 |
| NP_004362.2    | COPA     | 1.16 | 4.09E-01 | 1.00E+00 |
| XP_005265154.1 | APEH     | 0.43 | 4.12E-01 | 1.00E+00 |
| NP_001136077.1 | EFTUD2   | 0.88 | 4.13E-01 | 1.00E+00 |
| NP_001524.2    | HNRNPL   | 1.28 | 4.14E-01 | 1.00E+00 |
| XP_011525056.1 | GPI      | 0.96 | 4.16E-01 | 1.00E+00 |
| NP_001186128.1 | AK2      | 1.10 | 4.21E-01 | 1.00E+00 |
| NP_001258901.1 | HSP90AB1 | 0.95 | 4.24E-01 | 1.00E+00 |
| NP_001349691.1 | CSE1L    | 0.90 | 4.28E-01 | 1.00E+00 |
| NP_001278086.1 | EIF4G1   | 1.07 | 4.29E-01 | 1.00E+00 |
| NP_000962.2    | RPL7     | 0.93 | 4.32E-01 | 1.00E+00 |
| XP_024308692.1 | 43345    | 0.90 | 4.32E-01 | 1.00E+00 |
| NP_006286.1    | VARS     | 1.21 | 4.38E-01 | 1.00E+00 |
| XP_016865665.1 | SYNCRIP  | 0.89 | 4.39E-01 | 1.00E+00 |
| XP_005270360.1 | CDK1     | 0.91 | 4.41E-01 | 1.00E+00 |
| NP_001264152.1 | TAGLN2   | 0.89 | 4.46E-01 | 1.00E+00 |
| NP_000356.1    | TPI1     | 0.92 | 4.47E-01 | 1.00E+00 |
| NP_005539.1    | KARS     | 1.17 | 4.49E-01 | 1.00E+00 |
| NP_001308633.  | RPS9     | 1.13 | 4.49E-01 | 1.00E+00 |

**Supplementary Table 1**

|                |         |      |          |          |
|----------------|---------|------|----------|----------|
| 1              |         |      |          |          |
| NP_002194.2    | ITGA2   | 0.74 | 4.51E-01 | 1.00E+00 |
| XP_011515433.1 | PLEC    | 1.21 | 4.52E-01 | 1.00E+00 |
| NP_001185771.1 | CCT2    | 0.88 | 4.52E-01 | 1.00E+00 |
| NP_003082.1    | SNRPB   | 1.11 | 4.55E-01 | 1.00E+00 |
| NP_001345.1    | AKR1C2  | 1.12 | 4.56E-01 | 1.00E+00 |
| NP_000909.2    | P4HB    | 0.88 | 4.58E-01 | 1.00E+00 |
| NP_005712.1    | ACTR3   | 0.93 | 4.65E-01 | 1.00E+00 |
| XP_005264542.1 | SRSF7   | 0.87 | 4.67E-01 | 1.00E+00 |
| NP_000215.1    | KRT18   | 1.22 | 4.68E-01 | 1.00E+00 |
| NP_001055.1    | TKT     | 1.09 | 4.71E-01 | 1.00E+00 |
| NP_005330.1    | UBE2K   | 0.88 | 4.74E-01 | 1.00E+00 |
| NP_001159828.1 | SHMT2   | 0.83 | 4.74E-01 | 1.00E+00 |
| NP_001275907.1 | XRCC6   | 0.98 | 4.81E-01 | 1.00E+00 |
| XP_016877217.1 | ACTN1   | 1.21 | 4.81E-01 | 1.00E+00 |
| NP_001247440.1 | MGST1   | 1.19 | 4.82E-01 | 1.00E+00 |
| NP_001007075.1 | RPL32   | 0.94 | 4.84E-01 | 1.00E+00 |
| NP_002558.1    | PEBP1   | 0.94 | 4.84E-01 | 1.00E+00 |
| XP_011542194.1 | DDX3X   | 1.39 | 4.86E-01 | 1.00E+00 |
| XP_005270344.1 | BAG3    | 1.50 | 4.89E-01 | 1.00E+00 |
| NP_001316851.1 | CALM3   | 1.22 | 4.97E-01 | 1.00E+00 |
| NP_001274073.1 | TPD52   | 0.95 | 5.01E-01 | 1.00E+00 |
| NP_006576.2    | CCT8    | 0.94 | 5.02E-01 | 1.00E+00 |
| NP_001291381.1 | PGD     | 1.05 | 5.05E-01 | 1.00E+00 |
| NP_057177.1    | RPL26L1 | 0.93 | 5.12E-01 | 1.00E+00 |
| NP_005611.1    | S100A11 | 0.91 | 5.13E-01 | 1.00E+00 |
| NP_002892.1    | RCN1    | 1.12 | 5.17E-01 | 1.00E+00 |
| NP_001006.1    | RPS11   | 1.18 | 5.19E-01 | 1.00E+00 |
| NP_000445.1    | SOD1    | 1.12 | 5.20E-01 | 1.00E+00 |
| NP_005709.1    | ARPC4   | 1.10 | 5.24E-01 | 1.00E+00 |
| NP_001243650.1 | CCT4    | 0.97 | 5.24E-01 | 1.00E+00 |
| XP_011530781.1 | CCT7    | 0.91 | 5.25E-01 | 1.00E+00 |
| NP_009057.1    | VCP     | 0.97 | 5.28E-01 | 1.00E+00 |
| NP_665811.1    | AIFM1   | 0.85 | 5.30E-01 | 1.00E+00 |

**Supplementary Table 1**

|                |          |      |          |          |
|----------------|----------|------|----------|----------|
| NP_054779.1    | MCTS1    | 0.94 | 5.34E-01 | 1.00E+00 |
| XP_005245419.1 | S100A14  | 0.79 | 5.34E-01 | 1.00E+00 |
| NP_976240.1    | CAPRIN1  | 0.88 | 5.36E-01 | 1.00E+00 |
| NP_055644.2    | DDX46    | 0.90 | 5.36E-01 | 1.00E+00 |
| XP_016874610.1 | CORO1C   | 0.79 | 5.39E-01 | 1.00E+00 |
| NP_002286.2    | RPSA     | 0.96 | 5.39E-01 | 1.00E+00 |
| NP_005902.1    | MAT2A    | 1.08 | 5.41E-01 | 1.00E+00 |
| XP_024305327.1 | HNRNPC   | 1.19 | 5.42E-01 | 1.00E+00 |
| NP_001073027.1 | HNRNPUL2 | 1.14 | 5.42E-01 | 1.00E+00 |
| NP_002784.1    | PSMB1    | 1.20 | 5.44E-01 | 1.00E+00 |
| NP_036399.3    | HSPBP1   | 0.95 | 5.46E-01 | 1.00E+00 |
| NP_004631.1    | DDX39B   | 1.05 | 5.47E-01 | 1.00E+00 |
| NP_000981.1    | RPL27A   | 0.95 | 5.54E-01 | 1.00E+00 |
| NP_001254793.1 | SLIRP    | 1.05 | 5.54E-01 | 1.00E+00 |
| NP_001339705.1 | JUP      | 0.97 | 5.55E-01 | 1.00E+00 |
| XP_016884292.1 | MYH9     | 0.82 | 5.56E-01 | 1.00E+00 |
| XP_016860308.1 | TTN      | 1.37 | 5.60E-01 | 1.00E+00 |
| NP_524147.2    | MYL6     | 0.91 | 5.66E-01 | 1.00E+00 |
| NP_002148.1    | HSPE1    | 1.05 | 5.71E-01 | 1.00E+00 |
| XP_011518845.1 | DNM1L    | 1.20 | 5.73E-01 | 1.00E+00 |
| NP_003748.1    | EIF3I    | 1.16 | 5.74E-01 | 1.00E+00 |
| NP_061322.2    | MATR3    | 0.90 | 5.75E-01 | 1.00E+00 |
| XP_016883627.1 | RBM39    | 0.96 | 5.79E-01 | 1.00E+00 |
| NP_055227.1    | CACYBP   | 0.94 | 5.84E-01 | 1.00E+00 |
| NP_001014.1    | RPS20    | 0.97 | 5.84E-01 | 1.00E+00 |
| NP_001007101.1 | SCP2     | 0.97 | 5.88E-01 | 1.00E+00 |
| NP_004125.3    | HSPA9    | 0.97 | 5.90E-01 | 1.00E+00 |
| NP_001036041.1 | RRBP1    | 1.16 | 5.96E-01 | 1.00E+00 |
| NP_001091675.1 | HNRNPF   | 1.11 | 5.97E-01 | 1.00E+00 |
| NP_001017.1    | RPS24    | 1.02 | 5.97E-01 | 1.00E+00 |
| NP_663782.2    | AP1B1    | 1.08 | 5.98E-01 | 1.00E+00 |
| NP_000979.1    | RPL27    | 0.91 | 6.04E-01 | 1.00E+00 |
| NP_001189378.1 | ADK      | 0.90 | 6.08E-01 | 1.00E+00 |
| NP_006784.1    | PRDX3    | 1.05 | 6.08E-01 | 1.00E+00 |
| NP_001609.2    | PARP1    | 0.80 | 6.10E-01 | 1.00E+00 |

**Supplementary Table 1**

|                |           |      |          |          |
|----------------|-----------|------|----------|----------|
| NP_006817.1    | YWHAQ     | 1.07 | 6.11E-01 | 1.00E+00 |
| NP_001308412.1 | RPS19     | 0.93 | 6.15E-01 | 1.00E+00 |
| NP_004915.2    | ACTN4     | 1.03 | 6.17E-01 | 1.00E+00 |
| NP_001367.2    | DYNC1H1   | 1.07 | 6.20E-01 | 1.00E+00 |
| NP_817092.1    | PPM1G     | 0.95 | 6.20E-01 | 1.00E+00 |
| XP_016879108.1 | TUFM      | 0.95 | 6.22E-01 | 1.00E+00 |
| XP_016865310.1 | VDAC1     | 1.10 | 6.26E-01 | 1.00E+00 |
| NP_001019398.1 | ARF1      | 1.06 | 6.27E-01 | 1.00E+00 |
| XP_011523824.1 | EIF4A3    | 1.21 | 6.33E-01 | 1.00E+00 |
| NP_001303293.1 | EIF2S2    | 0.98 | 6.43E-01 | 1.00E+00 |
| XP_011540527.1 | CAPZA1    | 1.03 | 6.43E-01 | 1.00E+00 |
| NP_055317.1    | PRPF19    | 1.05 | 6.44E-01 | 1.00E+00 |
| NP_110379.2    | TCP1      | 1.01 | 6.46E-01 | 1.00E+00 |
| XP_016857522.1 | S100A6    | 0.92 | 6.47E-01 | 1.00E+00 |
| NP_705935.1    | TPM3      | 0.95 | 6.47E-01 | 1.00E+00 |
| NP_001257412.1 | TST       | 0.78 | 6.48E-01 | 1.00E+00 |
| NP_001182031.1 | GSR       | 0.91 | 6.49E-01 | 1.00E+00 |
| NP_000974.1    | RPL22     | 0.93 | 6.53E-01 | 1.00E+00 |
| NP_001007794.1 | BUB3      | 1.09 | 6.57E-01 | 1.00E+00 |
| NP_001914.3    | DDB1      | 0.83 | 6.58E-01 | 1.00E+00 |
| NP_003923.2    | ST13      | 0.96 | 6.59E-01 | 1.00E+00 |
| XP_016867599.1 | HNRNPA2B1 | 1.05 | 6.60E-01 | 1.00E+00 |
| NP_703194.1    | ILF3      | 0.93 | 6.61E-01 | 1.00E+00 |
| NP_006504.2    | SARS      | 1.09 | 6.68E-01 | 1.00E+00 |
| XP_005254500.1 | PKM       | 1.08 | 6.69E-01 | 1.00E+00 |
| NP_037473.3    | OLA1      | 0.86 | 6.69E-01 | 1.00E+00 |
| NP_066926.1    | TMSB10    | 1.06 | 6.72E-01 | 1.00E+00 |
| NP_006377.2    | DDX17     | 1.07 | 6.72E-01 | 1.00E+00 |
| NP_001027455.1 | TMPO      | 1.17 | 6.77E-01 | 1.00E+00 |
| NP_001231642.1 | RAD23B    | 1.06 | 6.80E-01 | 1.00E+00 |
| NP_001410.2    | ELAVL1    | 0.88 | 6.81E-01 | 1.00E+00 |
| NP_001009.1    | RPS15     | 1.02 | 6.82E-01 | 1.00E+00 |
| NP_001530.1    | DNAJA1    | 0.97 | 6.84E-01 | 1.00E+00 |
| NP_003134.1    | SSBP1     | 0.96 | 6.85E-01 | 1.00E+00 |



**Supplementary Table 1**

|                |             |      |          |          |
|----------------|-------------|------|----------|----------|
| NP_001308402.1 | THRAP3      | 1.11 | 6.94E-01 | 1.00E+00 |
| NP_000025.1    | ALDOA       | 0.96 | 6.95E-01 | 1.00E+00 |
| NP_001317186.1 | NPEPPS      | 1.03 | 7.06E-01 | 1.00E+00 |
| NP_001007.2    | RPS12       | 0.97 | 7.16E-01 | 1.00E+00 |
| NP_003745.1    | EIF3F       | 1.09 | 7.18E-01 | 1.00E+00 |
| XP_005250405.1 | MCM7        | 0.97 | 7.21E-01 | 1.00E+00 |
| NP_001407.1    | EIF4A1      | 0.96 | 7.23E-01 | 1.00E+00 |
| XP_011538832.1 | NUDC        | 0.97 | 7.29E-01 | 1.00E+00 |
| NP_064695.3    | AKR1B10     | 1.03 | 7.31E-01 | 1.00E+00 |
| NP_000998.1    | RPS4X       | 0.97 | 7.34E-01 | 1.00E+00 |
| NP_001731.2    | CALB2       | 0.87 | 7.36E-01 | 1.00E+00 |
| NP_006658.1    | PGRMC1      | 1.07 | 7.37E-01 | 1.00E+00 |
| NP_060918.2    | CAND1       | 0.97 | 7.38E-01 | 1.00E+00 |
| XP_011536691.1 | NACA        | 1.04 | 7.39E-01 | 1.00E+00 |
| NP_001340.2    | DARS        | 1.05 | 7.40E-01 | 1.00E+00 |
| NP_002957.1    | S100A10     | 0.97 | 7.41E-01 | 1.00E+00 |
| NP_056229.2    | RPL36       | 1.08 | 7.43E-01 | 1.00E+00 |
| NP_066932.1    | TMSB4X      | 0.92 | 7.43E-01 | 1.00E+00 |
| XP_016873759.1 | AHNAK       | 1.09 | 7.48E-01 | 1.00E+00 |
| NP_002256.2    | KPNB1       | 0.93 | 7.51E-01 | 1.00E+00 |
| NP_003133.1    | SSB         | 0.94 | 7.51E-01 | 1.00E+00 |
| NP_005909.2    | MDH2        | 1.04 | 7.52E-01 | 1.00E+00 |
| NP_006133.1    | SFN         | 1.05 | 7.55E-01 | 1.00E+00 |
| NP_001243839.1 | DDX21       | 1.08 | 7.61E-01 | 1.00E+00 |
| NP_001900.1    | CTSD        | 0.97 | 7.61E-01 | 1.00E+00 |
| NP_004921.1    | CAPZB       | 1.04 | 7.63E-01 | 1.00E+00 |
| NP_002799.3    | PSMD2       | 1.02 | 7.68E-01 | 1.00E+00 |
| NP_055866.1    | ERP44       | 1.04 | 7.71E-01 | 1.00E+00 |
| XP_016862911.1 | GMPS        | 0.98 | 7.71E-01 | 1.00E+00 |
| NP_001139580.1 | PTGR1       | 0.98 | 7.71E-01 | 1.00E+00 |
| NP_001308968.1 | NUTF2       | 0.93 | 7.80E-01 | 1.00E+00 |
| NP_001172006.1 | ARHGDI A    | 0.98 | 7.80E-01 | 1.00E+00 |
| XP_016875271.1 | RPL6        | 0.98 | 7.83E-01 | 1.00E+00 |
| NP_001189399.1 | RPS10-NUDT3 | 0.98 | 7.88E-01 | 1.00E+00 |
| NP_002800.2    | PSMD3       | 1.05 | 7.89E-01 | 1.00E+00 |

**Supplementary Table 1**

|                |          |      |          |          |
|----------------|----------|------|----------|----------|
| NP_000980.1    | RPL30    | 1.02 | 7.90E-01 | 1.00E+00 |
| NP_116126.3    | LMNB2    | 0.95 | 7.94E-01 | 1.00E+00 |
| NP_057212.1    | COPG1    | 1.11 | 7.96E-01 | 1.00E+00 |
| NP_005372.2    | NCL      | 1.02 | 8.00E-01 | 1.00E+00 |
| NP_005753.1    | TRIM28   | 1.02 | 8.01E-01 | 1.00E+00 |
| XP_024308955.1 | HAT1     | 0.96 | 8.02E-01 | 1.00E+00 |
| NP_116120.1    | TXNDC17  | 0.97 | 8.03E-01 | 1.00E+00 |
| NP_821133.1    | TUBB     | 1.03 | 8.07E-01 | 1.00E+00 |
| NP_001012.1    | RPS17    | 1.06 | 8.08E-01 | 1.00E+00 |
| NP_072045.1    | RPS18    | 1.04 | 8.10E-01 | 1.00E+00 |
| NP_001091.1    | ACTA1    | 1.02 | 8.14E-01 | 1.00E+00 |
| NP_006443.1    | PAICS    | 0.98 | 8.14E-01 | 1.00E+00 |
| NP_001596.2    | AARS     | 0.93 | 8.17E-01 | 1.00E+00 |
| NP_001116293.1 | SET      | 1.05 | 8.18E-01 | 1.00E+00 |
| NP_078934.3    | IPO4     | 0.96 | 8.23E-01 | 1.00E+00 |
| NP_005727.1    | ACTR1A   | 0.94 | 8.23E-01 | 1.00E+00 |
| NP_000959.2    | RPL4     | 1.02 | 8.23E-01 | 1.00E+00 |
| NP_003008.1    | SRSF3    | 0.96 | 8.24E-01 | 1.00E+00 |
| XP_011522035.1 | ALDH3A2  | 1.04 | 8.30E-01 | 1.00E+00 |
| NP_001139555.1 | MBOAT7   | 0.98 | 8.30E-01 | 1.00E+00 |
| NP_001280624.1 | 43352    | 1.01 | 8.32E-01 | 1.00E+00 |
| NP_036558.3    | SF3B3    | 1.03 | 8.34E-01 | 1.00E+00 |
| NP_059980.2    | TMED9    | 0.98 | 8.36E-01 | 1.00E+00 |
| NP_892116.2    | EIF5     | 0.96 | 8.39E-01 | 1.00E+00 |
| NP_004484.1    | HSD17B10 | 0.98 | 8.44E-01 | 1.00E+00 |
| NP_057006.1    | NSDHL    | 0.97 | 8.45E-01 | 1.00E+00 |
| NP_001193997.1 | BZW1     | 1.02 | 8.47E-01 | 1.00E+00 |
| XP_005255290.1 | FUS      | 1.02 | 8.47E-01 | 1.00E+00 |
| NP_001022.1    | RPS28    | 0.95 | 8.48E-01 | 1.00E+00 |
| NP_060979.2    | LRRC59   | 1.03 | 8.48E-01 | 1.00E+00 |
| NP_001267718.1 | SURF4    | 1.04 | 8.49E-01 | 1.00E+00 |
| NP_006810.1    | STIP1    | 0.98 | 8.49E-01 | 1.00E+00 |
| NP_001186041.1 | MDH1     | 0.99 | 8.54E-01 | 1.00E+00 |
| XP_005271172.1 | SFPQ     | 1.03 | 8.54E-01 | 1.00E+00 |
| XP_011513903.1 | EIF3B    | 1.02 | 8.59E-01 | 1.00E+00 |
| NP_002789.1    | PSMB6    | 0.98 | 8.62E-01 | 1.00E+00 |

**Supplementary Table 1**

|                |         |      |          |          |
|----------------|---------|------|----------|----------|
| NP_001193929.1 | HNRNPDL | 1.04 | 8.67E-01 | 1.00E+00 |
| NP_001003.1    | RPS8    | 0.98 | 8.71E-01 | 1.00E+00 |
| NP_065392.1    | APMAP   | 1.02 | 8.77E-01 | 1.00E+00 |
| NP_001348.2    | DHX9    | 0.97 | 8.82E-01 | 1.00E+00 |
| XP_011527446.1 | DSTN    | 0.98 | 8.83E-01 | 1.00E+00 |
| NP_665807.1    | MTPN    | 1.01 | 8.87E-01 | 1.00E+00 |
| NP_001011.1    | RPS16   | 1.02 | 8.92E-01 | 1.00E+00 |
| NP_009035.3    | RPL10A  | 0.99 | 9.00E-01 | 1.00E+00 |
| NP_036243.1    | AHSA1   | 0.98 | 9.03E-01 | 1.00E+00 |
| NP_066944.1    | EEF1B2  | 1.02 | 9.06E-01 | 1.00E+00 |
| NP_002777.1    | PSMA1   | 0.99 | 9.08E-01 | 1.00E+00 |
| XP_024308018.1 | ACO2    | 0.99 | 9.12E-01 | 1.00E+00 |
| NP_001317179.1 | HNRNPA3 | 1.03 | 9.13E-01 | 1.00E+00 |
| NP_004999.1    | SNU13   | 1.03 | 9.16E-01 | 1.00E+00 |
| NP_001075109.1 | PRKDC   | 1.01 | 9.18E-01 | 1.00E+00 |
| NP_001279.2    | CLIC1   | 1.01 | 9.24E-01 | 1.00E+00 |
| NP_001186092.1 | PSMC5   | 1.01 | 9.27E-01 | 1.00E+00 |
| 1EPT_B         | NA      | 1.01 | 9.29E-01 | 1.00E+00 |
| NP_001242941.1 | MYH10   | 1.01 | 9.33E-01 | 1.00E+00 |
| NP_004823.1    | GSTO1   | 1.01 | 9.34E-01 | 1.00E+00 |
| XP_011519389.1 | IPO5    | 0.98 | 9.42E-01 | 1.00E+00 |
| NP_005608.1    | RPS14   | 1.01 | 9.44E-01 | 1.00E+00 |
| NP_056988.3    | EIF5B   | 0.99 | 9.47E-01 | 1.00E+00 |
| NP_066964.1    | XRCC5   | 1.01 | 9.54E-01 | 1.00E+00 |
| NP_001015.1    | RPS21   | 0.99 | 9.72E-01 | 1.00E+00 |
| NP_037506.2    | PDCD6IP | 1.00 | 9.75E-01 | 1.00E+00 |
| NP_004598.1    | TBCA    | 1.00 | 9.77E-01 | 1.00E+00 |
| NP_001029025.1 | RPL3    | 1.00 | 9.85E-01 | 1.00E+00 |
| NP_006657.1    | RUVBL2  | 1.01 | 9.88E-01 | 1.00E+00 |
| NP_001129173.1 | YWHAZ   | 1.00 | 9.88E-01 | 1.00E+00 |
| NP_001748.1    | CBR1    | 1.00 | 9.89E-01 | 1.00E+00 |
| NP_005745.1    | G3BP1   | 1.00 | 9.96E-01 | 1.00E+00 |
| XP_011530775.1 | LRPPRC  | 1.00 | 1.00E+00 | 1.00E+00 |

**Supplementary Table 1:** Protein abundance differences between PC9-Tr-BrM and PC9-BrM cells as identified by label-free quantitative mass spectrometry. Protein name and NCBI sequence IDs are included. The ratios of normalized, quantitative mass spectrometry abundances are presented as PC9-Tr-BrM relative to PC9-BrM. P-values were computed using a two-tailed Student's t-test and adjusted for multiple hypothesis testing using a Bonferroni correction. See accompanying Figure 2.

Supplementary Table 2

| # DAVID analysis with proteins with log 2 FC > 0.7 (n=19 top proteins) in PC9- Tr-BrM vs BrM |                                                                    |       |      |          |                                                                                                                     |                 |            |           |          |
|----------------------------------------------------------------------------------------------|--------------------------------------------------------------------|-------|------|----------|---------------------------------------------------------------------------------------------------------------------|-----------------|------------|-----------|----------|
| Category                                                                                     | Term                                                               | Count | %    | PValue   | Genes (Red = S100A9/8)                                                                                              | Fold Enrichment | Bonferroni | Benjamini | FDR      |
| GOTERM_CC_DIRECT                                                                             | GO:0070062~extracellular exosome                                   | 13    | 68.4 | 1.32E-06 | <b>CAP1, CRABP2, IL18, MSN, CAPG, SOD2, PHB2, KRT17, ARHGDIB, NAMPT, CKB, S100A9, S100A8</b>                        | 4.44            | 9.38E-05   | 9.38E-05  | 8.98E-05 |
| UP_SEQ_FEATURE                                                                               | mutagenesis site                                                   | 11    | 57.9 | 4.52E-06 | <b>KRT17, CRABP2, STAT1, U2AF2, NAMPT, MYO18A, CKB, SOD2, S100A9, S100A8, CES1</b>                                  | 5.30            | 3.25E-04   | 3.30E-04  | 3.30E-04 |
| GOTERM_CC_DIRECT                                                                             | GO:0071944~cell periphery                                          | 3     | 15.8 | 6.68E-04 | KRT17, MSN, PHB2                                                                                                    | 73.78           | 0.046      | 0.024     | 0.023    |
| UP_KEYWORDS                                                                                  | Cytoplasm                                                          | 12    | 63.2 | 6.80E-04 | <b>KRT17, CRABP2, STAT1, NAMPT, ARHGDIB, MYO18A, MSN, CAPG, CKB, PHB2, S100A9, S100A8</b>                           | 2.70            | 0.054      | 0.030     | 0.030    |
| UP_KEYWORDS                                                                                  | S-nitrosylation                                                    | 3     | 15.8 | 1.01E-03 | <b>MSN, S100A9, S100A8</b>                                                                                          | 60.18           | 0.079      | 0.030     | 0.030    |
| UP_KEYWORDS                                                                                  | Acetylation                                                        | 10    | 52.6 | 1.11E-03 | CAP1, VAPA, STAT1, U2AF2, NAMPT, ARHGDIB, MSN, CAPG, SOD2, PHB2                                                     | 3.16            | 0.087      | 0.030     | 0.030    |
| GOTERM_CC_DIRECT                                                                             | GO:0005615~extracellular space                                     | 7     | 36.8 | 1.38E-03 | <b>NAMPT, IL18, MSN, CKB, S100A9, S100A8, CES1</b>                                                                  | 4.98            | 0.093      | 0.033     | 0.031    |
| GOTERM_CC_DIRECT                                                                             | GO:0005829~cytosol                                                 | 10    | 52.6 | 2.14E-03 | <b>RPL21, CRABP2, STAT1, NAMPT, ARHGDIB, IL18, CKB, S100A9, S100A8, CES1</b>                                        | 2.89            | 0.14       | 0.038     | 0.036    |
| GOTERM_CC_DIRECT                                                                             | GO:0005856~cytoskeleton                                            | 4     | 21.1 | 5.44E-03 | <b>ARHGDIB, MSN, S100A9, S100A8</b>                                                                                 | 10.34           | 0.32       | 0.077     | 0.074    |
| GOTERM_CC_DIRECT                                                                             | GO:0043209~myelin sheath                                           | 3     | 15.8 | 9.69E-03 | MSN, CKB, SOD2                                                                                                      | 18.93           | 0.50       | 0.11      | 0.11     |
| UP_KEYWORDS                                                                                  | Phosphoprotein                                                     | 14    | 73.7 | 5.83E-03 | <b>CAP1, STAT1, MSN, CAPG, PHB2, KRT17, VAPA, U2AF2, ARHGDIB, NAMPT, MYO18A, CKB, S100A9, CES1</b>                  | 1.84            | 0.38       | 0.12      | 0.12     |
| GOTERM_MF_DIRECT                                                                             | GO:0035662~Toll-like receptor 4 binding                            | 2     | 10.5 | 4.26E-03 | <b>S100A9, S100A8</b>                                                                                               | 444.24          | 0.28       | 0.16      | 0.15     |
| GOTERM_MF_DIRECT                                                                             | GO:0050544~arachidonic acid binding                                | 2     | 10.5 | 5.32E-03 | <b>S100A9, S100A8</b>                                                                                               | 355.39          | 0.34       | 0.16      | 0.15     |
| GOTERM_MF_DIRECT                                                                             | GO:0005515~protein binding                                         | 16    | 84.2 | 6.14E-03 | <b>RPL21, CRABP2, STAT1, IL18, MSN, CAPG, PHB2, KRT17, VAPA, U2AF2, ARHGDIB, NAMPT, MYO18A, CKB, S100A9, S100A8</b> | 1.62            | 0.38       | 0.16      | 0.15     |
| GOTERM_BP_DIRECT                                                                             | GO:0048661~positive regulation of smooth muscle cell proliferation | 3     | 15.8 | 1.85E-03 | STAT1, NAMPT, IL18                                                                                                  | 44.19           | 0.41       | 0.17      | 0.17     |
| GOTERM_BP_DIRECT                                                                             | GO:0070488~neutrophil aggregation                                  | 2     | 10.5 | 2.14E-03 | <b>S100A9, S100A8</b>                                                                                               | 883.79          | 0.46       | 0.17      | 0.17     |
| GOTERM_BP_DIRECT                                                                             | GO:0050729~positive regulation of inflammatory response            | 3     | 15.8 | 2.73E-03 | <b>IL18, S100A9, S100A8</b>                                                                                         | 36.32           | 0.54       | 0.17      | 0.17     |
| GOTERM_BP_DIRECT                                                                             | GO:0032602~chemokine production                                    | 2     | 10.5 | 3.21E-03 | <b>S100A9, S100A8</b>                                                                                               | 589.19          | 0.60       | 0.17      | 0.17     |
| GOTERM_BP_DIRECT                                                                             | GO:0030307~positive regulation of cell growth                      | 3     | 15.8 | 3.59E-03 | <b>KRT17, S100A9, S100A8</b>                                                                                        | 31.56           | 0.64       | 0.17      | 0.17     |
| GOTERM_BP_DIRECT                                                                             | GO:0002793~positive regulation of peptide secretion                | 2     | 10.5 | 4.28E-03 | <b>S100A9, S100A8</b>                                                                                               | 441.89          | 0.70       | 0.17      | 0.17     |
| GOTERM_BP_DIRECT                                                                             | GO:0032119~sequestering of zinc ion                                | 2     | 10.5 | 4.28E-03 | <b>S100A9, S100A8</b>                                                                                               | 441.89          | 0.70       | 0.17      | 0.17     |

|                  |                                                                         |    |      |          |                                                                  |        |      |      |      |
|------------------|-------------------------------------------------------------------------|----|------|----------|------------------------------------------------------------------|--------|------|------|------|
| GOTERM_MF_DIRECT | GO:0050786~RAGE receptor binding                                        | 2  | 10.5 | 1.17E-02 | S100A9, S100A8                                                   | 161.54 | 0.60 | 0.22 | 0.22 |
| GOTERM_BP_DIRECT | GO:0007165~signal transduction                                          | 6  | 31.6 | 6.28E-03 | CAP1, KRT17, VAPA, CRABP2, NAMPT, S100A9                         | 4.57   | 0.83 | 0.22 | 0.22 |
| UP_KEYWORDS      | Isopeptide bond                                                         | 5  | 26.3 | 1.50E-02 | CAP1, KRT17, CRABP2, STAT1, U2AF2                                | 4.78   | 0.71 | 0.25 | 0.24 |
| GOTERM_MF_DIRECT | GO:0004871~signal transducer activity                                   | 3  | 15.8 | 1.96E-02 | VAPA, STAT1, S100A9                                              | 13.07  | 0.78 | 0.26 | 0.25 |
| GOTERM_MF_DIRECT | GO:0008017~microtubule binding                                          | 3  | 15.8 | 2.03E-02 | VAPA, S100A9, S100A8                                             | 12.81  | 0.79 | 0.26 | 0.25 |
| SMART            | SM01394:SM01394                                                         | 2  | 10.5 | 2.48E-02 | S100A9, S100A8                                                   | 71.84  | 0.28 | 0.32 | 0.32 |
| GOTERM_BP_DIRECT | GO:0071803~positive regulation of podosome assembly                     | 2  | 10.5 | 1.07E-02 | MSN, CAPG                                                        | 176.76 | 0.95 | 0.33 | 0.33 |
| GOTERM_BP_DIRECT | GO:0002523~leukocyte migration involved in inflammatory response        | 2  | 10.5 | 1.17E-02 | S100A9, S100A8                                                   | 160.69 | 0.96 | 0.33 | 0.33 |
| GOTERM_MF_DIRECT | GO:0003779~actin binding                                                | 3  | 15.8 | 3.48E-02 | CAP1, MSN, CAPG                                                  | 9.59   | 0.93 | 0.36 | 0.35 |
| GOTERM_MF_DIRECT | GO:0098641~cadherin binding involved in cell-cell adhesion              | 3  | 15.8 | 3.75E-02 | VAPA, STAT1, CAPG                                                | 9.19   | 0.95 | 0.36 | 0.35 |
| GOTERM_CC_DIRECT | GO:0005913~cell-cell adherens junction                                  | 3  | 15.8 | 3.97E-02 | VAPA, STAT1, CAPG                                                | 8.91   | 0.94 | 0.40 | 0.39 |
| GOTERM_CC_DIRECT | GO:0005737~cytoplasm                                                    | 10 | 52.6 | 4.53E-02 | RPL21, KRT17, CRABP2, STAT1, NAMPT, ARHGDI, MSN, CAPG, CKB, PHB2 | 1.84   | 0.96 | 0.40 | 0.39 |
| GOTERM_BP_DIRECT | GO:0014002~astrocyte development                                        | 2  | 10.5 | 1.70E-02 | S100A9, S100A8                                                   | 110.47 | 0.99 | 0.44 | 0.43 |
| GOTERM_BP_DIRECT | GO:0051493~regulation of cytoskeleton organization                      | 2  | 10.5 | 2.02E-02 | S100A9, S100A8                                                   | 93.03  | 1.00 | 0.48 | 0.47 |
| UP_SEQ_FEATURE   | calcium-binding region:1; low affinity                                  | 2  | 10.5 | 1.69E-02 | S100A9, S100A8                                                   | 111.15 | 0.71 | 0.48 | 0.48 |
| UP_SEQ_FEATURE   | calcium-binding region:2; high affinity                                 | 2  | 10.5 | 1.96E-02 | S100A9, S100A8                                                   | 96.00  | 0.76 | 0.48 | 0.48 |
| GOTERM_BP_DIRECT | GO:0001816~cytokine production                                          | 2  | 10.5 | 2.65E-02 | S100A9, S100A8                                                   | 70.70  | 1.00 | 0.56 | 0.55 |
| GOTERM_BP_DIRECT | GO:0050832~defense response to fungus                                   | 2  | 10.5 | 2.86E-02 | S100A9, S100A8                                                   | 65.47  | 1.00 | 0.56 | 0.55 |
| GOTERM_BP_DIRECT | GO:0007267~cell-cell signaling                                          | 3  | 15.8 | 2.97E-02 | NAMPT, IL18, S100A9                                              | 10.44  | 1.00 | 0.56 | 0.55 |
| GOTERM_BP_DIRECT | GO:0098609~cell-cell adhesion                                           | 3  | 15.8 | 3.35E-02 | VAPA, STAT1, CAPG                                                | 9.78   | 1.00 | 0.58 | 0.57 |
| GOTERM_BP_DIRECT | GO:2001244~positive regulation of intrinsic apoptotic signaling pathway | 2  | 10.5 | 3.48E-02 | S100A9, S100A8                                                   | 53.56  | 1.00 | 0.58 | 0.57 |
| GOTERM_BP_DIRECT | GO:0010043~response to zinc ion                                         | 2  | 10.5 | 3.79E-02 | SOD2, S100A8                                                     | 49.10  | 1.00 | 0.60 | 0.59 |
| UP_KEYWORDS      | Nitration                                                               | 2  | 10.5 | 4.37E-02 | CKB, SOD2                                                        | 42.48  | 0.97 | 0.60 | 0.59 |

|                  |                                                                                             |   |      |          |                                   |       |      |      |      |
|------------------|---------------------------------------------------------------------------------------------|---|------|----------|-----------------------------------|-------|------|------|------|
| UP_KEYWORDS      | Ubl conjugation                                                                             | 5 | 26.3 | 5.62E-02 | CAP1, KRT17, CRABP2, STAT1, UZAF2 | 3.18  | 0.99 | 0.66 | 0.65 |
| UP_KEYWORDS      | Cytoskeleton                                                                                | 4 | 21.1 | 7.40E-02 | MYO18A, MSN, S100A9, S100A8       | 3.81  | 1.00 | 0.67 | 0.67 |
| UP_KEYWORDS      | Chemotaxis                                                                                  | 2 | 10.5 | 8.16E-02 | S100A9, S100A8                    | 22.33 | 1.00 | 0.67 | 0.67 |
| UP_KEYWORDS      | Secreted                                                                                    | 5 | 26.3 | 8.59E-02 | NAMPT, IL18, CAPG, S100A9, S100A8 | 2.76  | 1.00 | 0.67 | 0.67 |
| UP_KEYWORDS      | Antimicrobial                                                                               | 2 | 10.5 | 9.04E-02 | S100A9, S100A8                    | 20.06 | 1.00 | 0.67 | 0.67 |
| GOTERM_BP_DIRECT | GO:0042542~response to hydrogen peroxide                                                    | 2 | 10.5 | 5.33E-02 | STAT1, SOD2                       | 34.66 | 1.00 | 0.80 | 0.78 |
| INTERPRO         | IPR001751:S100/Calbindin-D9k, conserved site                                                | 2 | 10.5 | 2.40E-02 | S100A9, S100A8                    | 78.14 | 0.86 | 0.80 | 0.80 |
| INTERPRO         | IPR013787:S100/CaBP-9k-type, calcium binding, subdomain                                     | 2 | 10.5 | 2.78E-02 | S100A9, S100A8                    | 67.36 | 0.90 | 0.80 | 0.80 |
| INTERPRO         | IPR011992:EF-hand-like domain                                                               | 3 | 15.8 | 2.94E-02 | STAT1, S100A9, S100A8             | 10.50 | 0.91 | 0.80 | 0.80 |
| GOTERM_BP_DIRECT | GO:0006954~inflammatory response                                                            | 3 | 15.8 | 6.13E-02 | IL18, S100A9, S100A8              | 7.00  | 1.00 | 0.83 | 0.82 |
| GOTERM_BP_DIRECT | GO:0071407~cellular response to organic cyclic compound                                     | 2 | 10.5 | 6.14E-02 | STAT1, IL18                       | 29.96 | 1.00 | 0.83 | 0.82 |
| GOTERM_BP_DIRECT | GO:0030593~neutrophil chemotaxis                                                            | 2 | 10.5 | 6.85E-02 | S100A9, S100A8                    | 26.78 | 1.00 | 0.88 | 0.87 |
| GOTERM_BP_DIRECT | GO:0043066~negative regulation of apoptotic process                                         | 3 | 15.8 | 8.43E-02 | MYO18A, SOD2, PHB2                | 5.83  | 1.00 | 0.96 | 0.95 |
| GOTERM_BP_DIRECT | GO:0006919~activation of cysteine-type endopeptidase activity involved in apoptotic process | 2 | 10.5 | 8.54E-02 | S100A9, S100A8                    | 21.30 | 1.00 | 0.96 | 0.95 |
| GOTERM_BP_DIRECT | GO:0008544~epidermis development                                                            | 2 | 10.5 | 8.73E-02 | KRT17, CRABP2                     | 20.80 | 1.00 | 0.96 | 0.95 |
| GOTERM_BP_DIRECT | GO:0006928~movement of cell or subcellular component                                        | 2 | 10.5 | 8.83E-02 | ARHGDI1, MSN                      | 20.55 | 1.00 | 0.96 | 0.95 |
| KEGG_PATHWAY     | hsa05321:Inflammatory bowel disease (IBD)                                                   | 2 | 10.5 | 8.07E-02 | STAT1, IL18                       | 21.50 | 0.96 | 1.00 | 1.00 |

**# DAVID analysis with proteins with log 2 FC < -0.7 (n=19 top proteins) in Tr-BrM vs BrM**

| Category         | Term                             | Count | %  | PValue   | Genes (Purple = KRT)                                                                                      | Fold Enrichment | Bonferroni | Benjamini | FDR      |
|------------------|----------------------------------|-------|----|----------|-----------------------------------------------------------------------------------------------------------|-----------------|------------|-----------|----------|
| GOTERM_CC_DIRECT | GO:0070062~extracellular exosome | 13    | 76 | 1.76E-07 | PGAM1, KRT2, KRT1, AKR1C3, KRT10, APEH, UGDH, UCHL1, LGALS1, PSMB5, CDC37, DPYSL2, GARS                   | 5.0             | 7.90E-06   | 7.90E-06  | 7.38E-06 |
| GOTERM_CC_DIRECT | GO:0005737~cytoplasm             | 14    | 82 | 1.93E-05 | PGAM1, KRT2, AKR1C3, KRT10, APEH, TPD52L2, NSFL1C, UCHL1, LGALS1, CDC37, DPYSL2, FAM120A, GARS, RPL18     | 2.9             | 8.68E-04   | 4.34E-04  | 4.05E-04 |
| GOTERM_CC_DIRECT | GO:0005829~cytosol               | 11    | 65 | 1.07E-04 | NSFL1C, UGDH, UCHL1, PSMB5, DPYSL2, CDC37, PGAM1, AKR1C3, GARS, APEH, RPL18                               | 3.6             | 0.0048     | 0.0016    | 0.0015   |
| UP_KEYWORDS      | Phosphoprotein                   | 15    | 88 | 1.29E-04 | PGAM1, KRT2, KRT1, KRT10, APEH, TPD52L2, NSFL1C, UGDH, UCHL1, LGALS1, CDC37, DPYSL2, FAM120A, GARS, RPL18 | 2.2             | 0.0087     | 0.0088    | 0.0084   |

|                  |                                                              |    |    |          |                                                                        |       |       |       |       |
|------------------|--------------------------------------------------------------|----|----|----------|------------------------------------------------------------------------|-------|-------|-------|-------|
| OMIM_DISEASE     | 113800~Epidermolytic hyperkeratosis                          | 2  | 12 | 1.69E-03 | KRT1, KRT10                                                            | 948.0 | 0.020 | 0.010 | 0.010 |
| OMIM_DISEASE     | 607602~Ichthyosis, cyclic, with epidermolytic hyperkeratosis | 2  | 12 | 1.69E-03 | KRT1, KRT10                                                            | 948.0 | 0.020 | 0.010 | 0.010 |
| UP_SEQ_FEATURE   | region of interest:Coil 2                                    | 3  | 18 | 1.32E-03 | KRT2, KRT1, KRT10                                                      | 52.1  | 0.080 | 0.014 | 0.013 |
| UP_SEQ_FEATURE   | region of interest:Linker 12                                 | 3  | 18 | 1.32E-03 | KRT2, KRT1, KRT10                                                      | 52.1  | 0.080 | 0.014 | 0.013 |
| UP_SEQ_FEATURE   | region of interest:Coil 1B                                   | 3  | 18 | 1.56E-03 | KRT2, KRT1, KRT10                                                      | 47.8  | 0.094 | 0.014 | 0.013 |
| UP_SEQ_FEATURE   | region of interest:Linker 1                                  | 3  | 18 | 1.56E-03 | KRT2, KRT1, KRT10                                                      | 47.8  | 0.094 | 0.014 | 0.013 |
| UP_SEQ_FEATURE   | region of interest:Coil 1A                                   | 3  | 18 | 1.56E-03 | KRT2, KRT1, KRT10                                                      | 47.8  | 0.094 | 0.014 | 0.013 |
| UP_SEQ_FEATURE   | region of interest:Rod                                       | 3  | 18 | 1.60E-03 | KRT2, KRT1, KRT10                                                      | 47.2  | 0.096 | 0.014 | 0.013 |
| UP_SEQ_FEATURE   | region of interest:Head                                      | 3  | 18 | 1.68E-03 | KRT2, KRT1, KRT10                                                      | 46.0  | 0.10  | 0.014 | 0.013 |
| UP_SEQ_FEATURE   | region of interest:Tail                                      | 3  | 18 | 1.77E-03 | KRT2, KRT1, KRT10                                                      | 44.8  | 0.11  | 0.014 | 0.013 |
| UP_KEYWORDS      | Ichthyosis                                                   | 3  | 18 | 4.34E-04 | KRT2, KRT1, KRT10                                                      | 90.8  | 0.029 | 0.015 | 0.014 |
| SMART            | SM01391:SM01391                                              | 3  | 18 | 1.49E-03 | KRT2, KRT1, KRT10                                                      | 44.7  | 0.016 | 0.016 | 0.016 |
| UP_KEYWORDS      | Intermediate filament                                        | 3  | 18 | 1.60E-03 | KRT2, KRT1, KRT10                                                      | 47.2  | 0.10  | 0.036 | 0.035 |
| INTERPRO         | IPR018039:Intermediate filament protein, conserved site      | 3  | 18 | 1.36E-03 | KRT2, KRT1, KRT10                                                      | 51.2  | 0.067 | 0.051 | 0.051 |
| INTERPRO         | IPR001664:Intermediate filament protein                      | 3  | 18 | 2.01E-03 | KRT2, KRT1, KRT10                                                      | 42.0  | 0.098 | 0.051 | 0.051 |
| GOTERM_CC_DIRECT | GO:0043209~myelin sheath                                     | 3  | 18 | 7.68E-03 | UCHL1, DPYSL2, PGAM1                                                   | 21.2  | 0.29  | 0.076 | 0.071 |
| GOTERM_CC_DIRECT | GO:0016020~membrane                                          | 7  | 41 | 8.39E-03 | DPYSL2, PGAM1, KRT2, KRT1, FAM120A, KRT10, RPL18                       | 3.4   | 0.32  | 0.076 | 0.071 |
| UP_KEYWORDS      | Keratin                                                      | 3  | 18 | 6.15E-03 | KRT2, KRT1, KRT10                                                      | 23.7  | 0.34  | 0.10  | 0.10  |
| UP_KEYWORDS      | Acetylation                                                  | 8  | 47 | 9.94E-03 | UGDH, LGALS1, CDC37, PGAM1, FAM120A, GARS, APEH, TPD52L2               | 2.8   | 0.49  | 0.14  | 0.13  |
| UP_SEQ_FEATURE   | binding site:Substrate                                       | 3  | 18 | 2.34E-02 | UGDH, AKR1C3, GARS                                                     | 11.8  | 0.78  | 0.17  | 0.15  |
| UP_SEQ_FEATURE   | site:Stutter                                                 | 2  | 12 | 2.83E-02 | KRT2, KRT1                                                             | 65.6  | 0.84  | 0.18  | 0.16  |
| GOTERM_CC_DIRECT | GO:0005634~nucleus                                           | 10 | 59 | 2.41E-02 | NSFL1C, UGDH, LGALS1, PSMB5, KRT2, KRT1, FAM120A, AKR1C3, KRT10, RPL18 | 2.0   | 0.67  | 0.18  | 0.17  |
| UP_KEYWORDS      | Cytoplasm                                                    | 9  | 53 | 1.83E-02 | UCHL1, PSMB5, DPYSL2, CDC37, FAM120A, AKR1C3, GARS, APEH, RPL18        | 2.3   | 0.72  | 0.21  | 0.20  |
| GOTERM_MF_DIRECT | GO:0008242~omega peptidase activity                          | 2  | 12 | 2.84E-03 | UCHL1, APEH                                                            | 662.0 | 0.19  | 0.21  | 0.21  |
| GOTERM_CC_DIRECT | GO:0045111~intermediate filament cytoskeleton                | 2  | 12 | 4.47E-02 | NSFL1C, KRT2                                                           | 41.2  | 0.87  | 0.29  | 0.27  |
| UP_KEYWORDS      | Hydrolase                                                    | 5  | 29 | 3.58E-02 | UCHL1, PSMB5, PGAM1, GARS, APEH                                        | 3.6   | 0.92  | 0.34  | 0.32  |



|                  |                                                                              |   |    |          |                                    |      |      |      |      |
|------------------|------------------------------------------------------------------------------|---|----|----------|------------------------------------|------|------|------|------|
| UP_KEYWORDS      | Methylation                                                                  | 4 | 24 | 4.00E-02 | DPYSL2, KRT2, KRT1, FAM120A        | 4.8  | 0.94 | 0.34 | 0.32 |
| INTERPRO         | IPR003054:Type II keratin                                                    | 2 | 12 | 2.39E-02 | KRT2, KRT1                         | 78.0 | 0.71 | 0.41 | 0.41 |
| GOTERM_CC_DIRECT | GO:0045095~keratin filament                                                  | 2 | 12 | 8.43E-02 | KRT2, KRT1                         | 21.4 | 0.98 | 0.47 | 0.44 |
| GOTERM_CC_DIRECT | GO:0005882~intermediate filament                                             | 2 | 12 | 9.48E-02 | KRT2, KRT10                        | 19.0 | 0.99 | 0.47 | 0.44 |
| UP_SEQ_FEATURE   | mutagenesis site                                                             | 5 | 29 | 8.87E-02 | UCHL1, PSMB5, DPYSL2, AKR1C3, GARS | 2.7  | 1.00 | 0.52 | 0.47 |
| UP_SEQ_FEATURE   | region of interest:Substrate binding                                         | 2 | 12 | 9.95E-02 | UGDH, GARS                         | 18.0 | 1.00 | 0.53 | 0.48 |
| GOTERM_BP_DIRECT | GO:0043161~proteasome-mediated ubiquitin-dependent protein catabolic process | 3 | 18 | 1.38E-02 | NSFL1C, UCHL1, PSMB5               | 15.5 | 0.88 | 1.00 | 1.00 |
| GOTERM_MF_DIRECT | GO:0019901~protein kinase binding                                            | 3 | 18 | 4.83E-02 | DPYSL2, CDC37, PGAM1               | 7.9  | 0.98 | 1.00 | 1.00 |
| GOTERM_BP_DIRECT | GO:0030216~keratinocyte differentiation                                      | 2 | 12 | 6.58E-02 | AKR1C3, KRT10                      | 27.6 | 1.00 | 1.00 | 1.00 |
| GOTERM_MF_DIRECT | GO:0043130~ubiquitin binding                                                 | 2 | 12 | 7.15E-02 | NSFL1C, UCHL1                      | 25.5 | 1.00 | 1.00 | 1.00 |
| GOTERM_MF_DIRECT | GO:0044822~poly(A) RNA binding                                               | 4 | 24 | 8.70E-02 | LGALS1, FAM120A, APEH, TPD52L2     | 3.5  | 1.00 | 1.00 | 1.00 |
| GOTERM_BP_DIRECT | GO:0006979~response to oxidative stress                                      | 2 | 12 | 9.39E-02 | PSMB5, KRT1                        | 19.1 | 1.00 | 1.00 | 1.00 |

**Supplementary Table 2:** DAVID functional annotation of pathways significantly enriched among proteins differentially expressed in PC9-Tr-BrM ( $\log_2$  FC > 0.7) and PC9-BrM ( $\log_2$  FC < -0.7). Gene sets that include S100A9 are highlighted with red font.

**Supplementary Table 3 (PC9 model)**

| Gene     | baseMean | log2FoldChange | lfcSE | stat   | pvalue    | padj      | Significant |
|----------|----------|----------------|-------|--------|-----------|-----------|-------------|
| PI3      | 5186     | -4.82          | 0.053 | -90.29 | 0         | 0         | UP          |
| S100A9   | 8768     | -2.61          | 0.031 | -83.08 | 0         | 0         | UP          |
| ASS1     | 3706     | -2.63          | 0.041 | -63.53 | 0         | 0         | UP          |
| TFPI2    | 6132     | -2.61          | 0.043 | -60.09 | 0         | 0         | UP          |
| MUC16    | 4730     | -2.45          | 0.041 | -59.45 | 0         | 0         | UP          |
| SVEP1    | 1413     | -4.01          | 0.078 | -51.59 | 0         | 0         | UP          |
| MSLN     | 1388     | -3.79          | 0.076 | -49.81 | 0         | 0         | UP          |
| KRT6B    | 1726     | -2.47          | 0.055 | -44.74 | 0         | 0         | UP          |
| MUC5B    | 1169     | -4.97          | 0.114 | -43.70 | 0         | 0         | UP          |
| ALDH1A1  | 1146     | -5.66          | 0.133 | -42.54 | 0         | 0         | UP          |
| H19      | 3312     | -8.73          | 0.211 | -41.40 | 0         | 0         | UP          |
| SLC1A3   | 1139     | -2.69          | 0.069 | -39.27 | 0         | 0         | UP          |
| CES1     | 10165    | -12.03         | 0.373 | -32.22 | 9.61E-228 | 1.86E-225 | UP          |
| FSTL1    | 619      | -3.22          | 0.101 | -31.78 | 1.30E-221 | 2.39E-219 | UP          |
| DOCK11   | 715      | -2.62          | 0.084 | -31.14 | 6.17E-213 | 1.08E-210 | UP          |
| CFD      | 687      | -2.54          | 0.086 | -29.61 | 1.06E-192 | 1.44E-190 | UP          |
| WNT6     | 668      | -2.52          | 0.086 | -29.36 | 2.05E-189 | 2.65E-187 | UP          |
| SUSD2    | 539      | -3.55          | 0.121 | -29.21 | 1.64E-187 | 2.06E-185 | UP          |
| NCF2     | 605      | -2.77          | 0.095 | -29.18 | 3.06E-187 | 3.81E-185 | UP          |
| DNER     | 406      | -4.07          | 0.148 | -27.57 | 2.25E-167 | 2.53E-165 | UP          |
| EDN1     | 479      | -2.94          | 0.107 | -27.54 | 5.26E-167 | 5.82E-165 | UP          |
| MYPN     | 519      | -2.66          | 0.100 | -26.48 | 1.64E-154 | 1.57E-152 | UP          |
| KRT4     | 445      | -5.75          | 0.218 | -26.44 | 4.20E-154 | 3.99E-152 | UP          |
| B4GALNT3 | 424      | -2.77          | 0.109 | -25.32 | 2.15E-141 | 1.80E-139 | UP          |
| SORBS1   | 336      | -3.35          | 0.136 | -24.65 | 3.41E-134 | 2.63E-132 | UP          |
| STEAP4   | 447      | -2.52          | 0.104 | -24.33 | 9.24E-131 | 6.82E-129 | UP          |
| ADAMTS12 | 302      | -3.80          | 0.157 | -24.14 | 9.78E-129 | 7.11E-127 | UP          |
| PSG5     | 306      | -4.22          | 0.177 | -23.86 | 8.87E-126 | 6.19E-124 | UP          |
| KLHDC7B  | 263      | -4.15          | 0.185 | -22.43 | 2.21E-111 | 1.28E-109 | UP          |
| NCCRP1   | 245      | -4.34          | 0.198 | -21.91 | 2.32E-    | 1.27E-    | UP          |

**Supplementary Table 3 (PC9 model)**

|          |      |        |       |        | 106       | 104      |    |
|----------|------|--------|-------|--------|-----------|----------|----|
| ABCA12   | 281  | -3.01  | 0.141 | -21.36 | 3.07E-101 | 1.57E-99 | UP |
| QPRT     | 237  | -3.75  | 0.179 | -21.00 | 5.95E-98  | 2.86E-96 | UP |
| KRT17    | 385  | -6.95  | 0.341 | -20.39 | 2.06E-92  | 9.09E-91 | UP |
| SLC22A31 | 211  | -4.30  | 0.216 | -19.92 | 2.52E-88  | 1.05E-86 | UP |
| BMP2     | 299  | -2.58  | 0.132 | -19.59 | 2.07E-85  | 8.22E-84 | UP |
| KRT23    | 1619 | -10.48 | 0.547 | -19.16 | 8.32E-82  | 3.15E-80 | UP |
| MAGEA1   | 217  | -5.66  | 0.302 | -18.72 | 3.64E-78  | 1.32E-76 | UP |
| C1S      | 267  | -2.40  | 0.132 | -18.22 | 3.62E-74  | 1.20E-72 | UP |
| SGPP2    | 213  | -2.81  | 0.158 | -17.78 | 9.37E-71  | 2.89E-69 | UP |
| S100A8   | 328  | -7.27  | 0.410 | -17.75 | 1.80E-70  | 5.52E-69 | UP |
| KRT5     | 350  | -7.48  | 0.426 | -17.59 | 3.14E-69  | 9.31E-68 | UP |
| TYMP     | 224  | -2.56  | 0.147 | -17.39 | 1.03E-67  | 2.93E-66 | UP |
| SLC7A2   | 170  | -3.40  | 0.202 | -16.84 | 1.29E-63  | 3.40E-62 | UP |
| MUC6     | 179  | -5.76  | 0.345 | -16.70 | 1.37E-62  | 3.56E-61 | UP |
| ROBO1    | 186  | -6.06  | 0.368 | -16.47 | 6.02E-61  | 1.50E-59 | UP |
| CLMP     | 155  | -3.03  | 0.190 | -15.91 | 5.00E-57  | 1.17E-55 | UP |
| BMP7     | 131  | -4.91  | 0.313 | -15.69 | 1.69E-55  | 3.80E-54 | UP |
| SUSD4    | 123  | -3.77  | 0.243 | -15.53 | 2.18E-54  | 4.77E-53 | UP |
| GALNT18  | 157  | -2.81  | 0.184 | -15.25 | 1.61E-52  | 3.41E-51 | UP |
| SAA1     | 201  | -6.80  | 0.449 | -15.16 | 6.67E-52  | 1.39E-50 | UP |
| ATP6V1C2 | 119  | -3.52  | 0.236 | -14.93 | 2.06E-50  | 4.13E-49 | UP |
| PTCHD1   | 145  | -5.87  | 0.395 | -14.88 | 4.27E-50  | 8.49E-49 | UP |
| KIF26A   | 140  | -3.05  | 0.209 | -14.62 | 2.00E-48  | 3.81E-47 | UP |
| GGT5     | 140  | -6.04  | 0.422 | -14.30 | 2.20E-46  | 3.94E-45 | UP |
| LOXL4    | 105  | -4.90  | 0.349 | -14.04 | 8.56E-45  | 1.47E-43 | UP |
| ABCA4    | 115  | -3.04  | 0.221 | -13.76 | 4.47E-43  | 7.34E-42 | UP |
| DIO3     | 96   | -4.28  | 0.312 | -13.73 | 6.81E-43  | 1.11E-41 | UP |
| THSD7A   | 120  | -2.95  | 0.215 | -13.70 | 1.00E-42  | 1.63E-41 | UP |
| C6orf223 | 94   | -4.41  | 0.324 | -13.63 | 2.76E-42  | 4.44E-41 | UP |
| ZDHHC11B | 94   | -3.88  | 0.290 | -13.40 | 6.26E-41  | 9.67E-40 | UP |
| PECAM1   | 94   | -3.53  | 0.266 | -13.26 | 4.03E-40  | 6.05E-39 | UP |
| SLC6A14  | 992  | -10.99 | 0.835 | -13.17 | 1.25E-39  | 1.84E-38 | UP |
| UGT1A7   | 90   | -3.66  | 0.278 | -13.14 | 1.90E-39  | 2.78E-38 | UP |
| ELOVL3   | 94   | -3.41  | 0.265 | -12.86 | 7.63E-38  | 1.05E-36 | UP |
| PALMD    | 102  | -5.69  | 0.444 | -12.83 | 1.12E-37  | 1.54E-36 | UP |
| MGP      | 292  | -4.26  | 0.344 | -12.36 | 4.24E-35  | 5.38E-34 | UP |
| PTGS1    | 84   | -3.19  | 0.263 | -12.13 | 7.09E-34  | 8.61E-33 | UP |

**Supplementary Table 3 (PC9 model)**

|           |     |        |       |        |          |          |    |
|-----------|-----|--------|-------|--------|----------|----------|----|
| ACTBL2    | 90  | -3.08  | 0.254 | -12.12 | 8.40E-34 | 1.02E-32 | UP |
| PIP5K1B   | 78  | -3.63  | 0.301 | -12.08 | 1.34E-33 | 1.61E-32 | UP |
| SCNN1B    | 81  | -3.33  | 0.279 | -11.92 | 9.45E-33 | 1.11E-31 | UP |
| KRT13     | 71  | -4.72  | 0.405 | -11.65 | 2.34E-31 | 2.60E-30 | UP |
| TFF1      | 81  | -5.47  | 0.471 | -11.61 | 3.79E-31 | 4.17E-30 | UP |
| SUN3      | 70  | -3.70  | 0.319 | -11.60 | 3.93E-31 | 4.32E-30 | UP |
| VTN       | 96  | -2.54  | 0.225 | -11.29 | 1.42E-29 | 1.49E-28 | UP |
| EFS       | 63  | -3.59  | 0.326 | -11.02 | 2.99E-28 | 3.04E-27 | UP |
| RELN      | 66  | -3.45  | 0.325 | -10.59 | 3.23E-26 | 3.04E-25 | UP |
| ELFN1-AS1 | 82  | -2.45  | 0.235 | -10.45 | 1.49E-25 | 1.36E-24 | UP |
| SLC16A14  | 67  | -2.83  | 0.275 | -10.28 | 8.33E-25 | 7.39E-24 | UP |
| KCNQ2     | 87  | -2.42  | 0.238 | -10.17 | 2.66E-24 | 2.32E-23 | UP |
| CPE       | 80  | -2.51  | 0.252 | -9.96  | 2.18E-23 | 1.81E-22 | UP |
| DDIT4L    | 53  | -3.71  | 0.373 | -9.95  | 2.43E-23 | 2.01E-22 | UP |
| GUCY1B1   | 52  | -3.56  | 0.362 | -9.84  | 7.25E-23 | 5.87E-22 | UP |
| TMPRSS3   | 54  | -5.33  | 0.557 | -9.58  | 9.75E-22 | 7.56E-21 | UP |
| CA12      | 49  | -3.66  | 0.390 | -9.38  | 6.48E-21 | 4.87E-20 | UP |
| ILD1R1    | 49  | -3.23  | 0.347 | -9.32  | 1.13E-20 | 8.39E-20 | UP |
| HCN4      | 51  | -3.05  | 0.332 | -9.21  | 3.39E-20 | 2.45E-19 | UP |
| SLC34A2   | 124 | -10.44 | 1.187 | -8.79  | 1.43E-18 | 9.70E-18 | UP |
| HLA-F     | 59  | -2.49  | 0.283 | -8.79  | 1.51E-18 | 1.02E-17 | UP |
| PRICKLE1  | 58  | -2.41  | 0.276 | -8.76  | 1.92E-18 | 1.29E-17 | UP |
| A2ML1     | 58  | -2.45  | 0.282 | -8.70  | 3.19E-18 | 2.13E-17 | UP |
| RYR1      | 66  | -2.41  | 0.277 | -8.68  | 3.92E-18 | 2.60E-17 | UP |
| LINC01133 | 42  | -3.29  | 0.380 | -8.67  | 4.44E-18 | 2.94E-17 | UP |
| DEGS2     | 38  | -3.97  | 0.464 | -8.57  | 1.07E-17 | 6.89E-17 | UP |
| FOLR1     | 53  | -2.56  | 0.299 | -8.56  | 1.16E-17 | 7.51E-17 | UP |
| INSL4     | 52  | -2.63  | 0.308 | -8.54  | 1.31E-17 | 8.43E-17 | UP |
| OSBPL6    | 53  | -2.56  | 0.306 | -8.37  | 5.59E-17 | 3.45E-16 | UP |
| GUCY1A1   | 36  | -4.00  | 0.478 | -8.37  | 5.83E-17 | 3.59E-16 | UP |
| C9orf152  | 52  | -2.76  | 0.331 | -8.34  | 7.50E-17 | 4.59E-16 | UP |
| SPATA6    | 36  | -3.70  | 0.444 | -8.33  | 8.15E-17 | 4.96E-16 | UP |
| SELENBP1  | 105 | -8.34  | 1.033 | -8.07  | 6.91E-16 | 3.99E-15 | UP |
| WAKMAR2   | 39  | -3.05  | 0.381 | -8.00  | 1.29E-15 | 7.33E-15 | UP |
| REN       | 50  | -2.47  | 0.312 | -7.91  | 2.65E-15 | 1.48E-14 | UP |
| FMOD      | 58  | -9.35  | 1.196 | -7.82  | 5.26E-15 | 2.90E-14 | UP |
| LINC02015 | 33  | -5.06  | 0.649 | -7.79  | 6.46E-15 | 3.55E-14 | UP |

**Supplementary Table 3 (PC9 model)**

|               |     |       |       |       |          |          |    |
|---------------|-----|-------|-------|-------|----------|----------|----|
| GGT6          | 106 | -9.24 | 1.188 | -7.78 | 7.25E-15 | 3.98E-14 | UP |
| PCBP3         | 33  | -3.35 | 0.430 | -7.77 | 7.64E-15 | 4.18E-14 | UP |
| LGI2          | 31  | -4.04 | 0.521 | -7.76 | 8.68E-15 | 4.73E-14 | UP |
| CES1P1        | 48  | -9.06 | 1.202 | -7.54 | 4.72E-14 | 2.47E-13 | UP |
| DIO3OS        | 33  | -2.98 | 0.401 | -7.43 | 1.11E-13 | 5.70E-13 | UP |
| CSTA          | 42  | -6.41 | 0.866 | -7.40 | 1.41E-13 | 7.19E-13 | UP |
| TNFSF12       | 26  | -4.45 | 0.622 | -7.15 | 8.53E-13 | 4.13E-12 | UP |
| IL32          | 36  | -2.51 | 0.364 | -6.89 | 5.69E-12 | 2.62E-11 | UP |
| CELF2         | 25  | -4.89 | 0.714 | -6.85 | 7.56E-12 | 3.46E-11 | UP |
| PDZK1IP1      | 23  | -7.98 | 1.222 | -6.53 | 6.73E-11 | 2.87E-10 | UP |
| SCAT1         | 25  | -3.12 | 0.479 | -6.51 | 7.49E-11 | 3.18E-10 | UP |
| LINC0210<br>1 | 21  | -7.87 | 1.230 | -6.40 | 1.59E-10 | 6.57E-10 | UP |
| TMEM59L       | 30  | -2.73 | 0.432 | -6.30 | 2.89E-10 | 1.17E-09 | UP |
| ARHGAP4<br>4  | 28  | -2.72 | 0.435 | -6.26 | 3.88E-10 | 1.56E-09 | UP |
| FAM155B       | 20  | -4.03 | 0.648 | -6.22 | 4.85E-10 | 1.93E-09 | UP |
| RSPO3         | 20  | -3.53 | 0.570 | -6.20 | 5.79E-10 | 2.29E-09 | UP |
| ELFN1         | 24  | -2.79 | 0.453 | -6.16 | 7.27E-10 | 2.86E-09 | UP |
| SCNN1G        | 25  | -2.69 | 0.438 | -6.14 | 8.34E-10 | 3.26E-09 | UP |
| SIRPG         | 23  | -3.06 | 0.502 | -6.10 | 1.06E-09 | 4.11E-09 | UP |
| PGAM1P1       | 17  | -7.54 | 1.237 | -6.10 | 1.07E-09 | 4.14E-09 | UP |
| MAOB          | 32  | -2.41 | 0.400 | -6.03 | 1.66E-09 | 6.36E-09 | UP |
| PGBD5         | 20  | -3.54 | 0.592 | -5.98 | 2.17E-09 | 8.20E-09 | UP |
| LINC0197<br>9 | 48  | -3.30 | 0.562 | -5.88 | 4.17E-09 | 1.54E-08 | UP |
| ONECUT3       | 14  | -7.32 | 1.247 | -5.87 | 4.35E-09 | 1.60E-08 | UP |
| RERG          | 18  | -3.86 | 0.663 | -5.82 | 5.78E-09 | 2.10E-08 | UP |
| RGS16         | 18  | -4.71 | 0.814 | -5.79 | 7.06E-09 | 2.55E-08 | UP |
| GLDN          | 23  | -6.13 | 1.068 | -5.74 | 9.69E-09 | 3.46E-08 | UP |
| RCN3          | 17  | -3.79 | 0.666 | -5.69 | 1.29E-08 | 4.58E-08 | UP |
| PSG8          | 20  | -2.76 | 0.493 | -5.60 | 2.19E-08 | 7.58E-08 | UP |
| LINC0114<br>5 | 18  | 3.14  | 0.564 | 5.57  | 2.58E-08 | 8.89E-08 | DN |
| HSD3BP5       | 20  | 2.80  | 0.502 | 5.58  | 2.37E-08 | 8.21E-08 | DN |
| TBX20         | 22  | 6.87  | 1.226 | 5.60  | 2.09E-08 | 7.26E-08 | DN |
| PIK3C2G       | 24  | 7.05  | 1.229 | 5.74  | 9.46E-09 | 3.38E-08 | DN |
| NPBWR1        | 20  | 3.12  | 0.540 | 5.78  | 7.43E-09 | 2.68E-08 | DN |
| KLHL4         | 14  | 7.25  | 1.248 | 5.81  | 6.30E-09 | 2.28E-08 | DN |
| FES           | 25  | 2.64  | 0.452 | 5.85  | 4.94E-09 | 1.81E-08 | DN |
| ADAMTS1<br>5  | 18  | 4.08  | 0.686 | 5.95  | 2.70E-09 | 1.01E-08 | DN |

**Supplementary Table 3 (PC9 model)**

|           |     |       |       |       |          |          |    |
|-----------|-----|-------|-------|-------|----------|----------|----|
| ANKRD29   | 24  | 2.72  | 0.452 | 6.00  | 1.92E-09 | 7.29E-09 | DN |
| SRPK3     | 22  | 3.15  | 0.522 | 6.04  | 1.51E-09 | 5.79E-09 | DN |
| ADAMTS6   | 24  | 5.53  | 0.899 | 6.15  | 7.90E-10 | 3.10E-09 | DN |
| KLF12     | 23  | 5.01  | 0.789 | 6.36  | 2.06E-10 | 8.44E-10 | DN |
| HOXC4     | 21  | 7.79  | 1.224 | 6.36  | 2.02E-10 | 8.27E-10 | DN |
| TCAF2     | 27  | 2.82  | 0.436 | 6.45  | 1.12E-10 | 4.68E-10 | DN |
| C11orf86  | 27  | 2.93  | 0.451 | 6.50  | 8.10E-11 | 3.43E-10 | DN |
| COL4A3    | 29  | 2.68  | 0.412 | 6.52  | 7.25E-11 | 3.08E-10 | DN |
| MANCR     | 31  | 2.86  | 0.412 | 6.94  | 3.95E-12 | 1.84E-11 | DN |
| L3MBTL3   | 42  | 2.41  | 0.335 | 7.20  | 6.05E-13 | 2.96E-12 | DN |
| PROX1     | 30  | 5.11  | 0.703 | 7.26  | 3.78E-13 | 1.88E-12 | DN |
| NLRP1     | 37  | 2.99  | 0.386 | 7.74  | 1.02E-14 | 5.54E-14 | DN |
| UCN2      | 49  | 2.42  | 0.310 | 7.79  | 6.46E-15 | 3.55E-14 | DN |
| CCDC169   | 37  | 3.24  | 0.403 | 8.03  | 9.67E-16 | 5.54E-15 | DN |
| HOXC6     | 42  | 3.01  | 0.371 | 8.10  | 5.49E-16 | 3.18E-15 | DN |
| ADGRV1    | 41  | 3.25  | 0.401 | 8.11  | 5.08E-16 | 2.95E-15 | DN |
| C12orf75  | 39  | 3.39  | 0.416 | 8.14  | 3.94E-16 | 2.31E-15 | DN |
| ACSL5     | 53  | 2.46  | 0.297 | 8.30  | 1.07E-16 | 6.48E-16 | DN |
| SH3BGRL   | 39  | 3.55  | 0.423 | 8.39  | 4.67E-17 | 2.91E-16 | DN |
| NRG1      | 42  | 4.29  | 0.479 | 8.95  | 3.41E-19 | 2.37E-18 | DN |
| TCP11L2   | 54  | 2.88  | 0.319 | 9.02  | 1.84E-19 | 1.30E-18 | DN |
| TLE4      | 45  | 4.39  | 0.479 | 9.17  | 4.75E-20 | 3.42E-19 | DN |
| NR2F1-AS1 | 55  | 2.89  | 0.314 | 9.21  | 3.31E-20 | 2.39E-19 | DN |
| MLLT11    | 63  | 2.73  | 0.293 | 9.32  | 1.13E-20 | 8.35E-20 | DN |
| LYPD1     | 62  | 2.80  | 0.289 | 9.68  | 3.60E-22 | 2.85E-21 | DN |
| DMD       | 50  | 4.21  | 0.432 | 9.73  | 2.25E-22 | 1.79E-21 | DN |
| CDH2      | 407 | 12.08 | 1.181 | 10.23 | 1.46E-24 | 1.28E-23 | DN |
| TRPV2     | 74  | 2.80  | 0.273 | 10.25 | 1.17E-24 | 1.03E-23 | DN |
| HPGD      | 71  | 2.83  | 0.273 | 10.37 | 3.34E-25 | 3.00E-24 | DN |
| SLC2A12   | 90  | 2.42  | 0.232 | 10.43 | 1.77E-25 | 1.61E-24 | DN |
| FLRT2     | 85  | 2.73  | 0.255 | 10.72 | 8.37E-27 | 8.06E-26 | DN |
| LPL       | 78  | 3.03  | 0.280 | 10.84 | 2.30E-27 | 2.26E-26 | DN |
| NR2F1     | 63  | 3.72  | 0.343 | 10.85 | 2.05E-27 | 2.02E-26 | DN |
| DUXAP8    | 107 | 2.49  | 0.227 | 10.94 | 7.42E-28 | 7.44E-27 | DN |
| ADM5      | 76  | 2.91  | 0.265 | 10.99 | 4.24E-28 | 4.29E-27 | DN |
| TNFRSF19  | 81  | 2.97  | 0.267 | 11.13 | 9.12E-29 | 9.39E-28 | DN |
| RHBDL1    | 99  | 2.66  | 0.231 | 11.51 | 1.20E-30 | 1.30E-29 | DN |
| PROCR     | 101 | 2.82  | 0.233 | 12.12 | 7.99E-34 | 9.69E-33 | DN |

**Supplementary Table 3 (PC9 model)**

|         |      |      |       |       |           |           |    |
|---------|------|------|-------|-------|-----------|-----------|----|
| TSPAN12 | 81   | 4.23 | 0.344 | 12.30 | 9.38E-35  | 1.18E-33  | DN |
| VWA5B2  | 119  | 2.45 | 0.198 | 12.41 | 2.21E-35  | 2.84E-34  | DN |
| CALHM3  | 103  | 2.91 | 0.229 | 12.67 | 8.14E-37  | 1.09E-35  | DN |
| TTLL7   | 127  | 2.57 | 0.201 | 12.84 | 1.01E-37  | 1.39E-36  | DN |
| SLC4A8  | 129  | 2.65 | 0.200 | 13.28 | 3.12E-40  | 4.70E-39  | DN |
| GPX3    | 101  | 3.67 | 0.274 | 13.37 | 8.90E-41  | 1.37E-39  | DN |
| MRC2    | 134  | 2.71 | 0.195 | 13.89 | 7.61E-44  | 1.28E-42  | DN |
| NES     | 130  | 3.03 | 0.208 | 14.58 | 3.88E-48  | 7.32E-47  | DN |
| CDYL2   | 333  | 8.12 | 0.553 | 14.69 | 7.13E-49  | 1.38E-47  | DN |
| SDK1    | 137  | 2.96 | 0.200 | 14.78 | 1.90E-49  | 3.72E-48  | DN |
| TRBC2   | 123  | 4.75 | 0.317 | 15.00 | 7.73E-51  | 1.56E-49  | DN |
| BEND7   | 131  | 3.34 | 0.220 | 15.16 | 6.69E-52  | 1.40E-50  | DN |
| FREM2   | 163  | 2.86 | 0.182 | 15.72 | 1.09E-55  | 2.45E-54  | DN |
| EYA4    | 215  | 6.59 | 0.414 | 15.89 | 7.44E-57  | 1.74E-55  | DN |
| TLR4    | 206  | 6.22 | 0.377 | 16.51 | 2.88E-61  | 7.28E-60  | DN |
| PTGS2   | 143  | 4.07 | 0.246 | 16.56 | 1.42E-61  | 3.62E-60  | DN |
| SPART   | 1135 | 2.55 | 0.139 | 18.34 | 4.02E-75  | 1.37E-73  | DN |
| FILIP1L | 280  | 2.57 | 0.138 | 18.65 | 1.15E-77  | 4.10E-76  | DN |
| MFNG    | 209  | 3.16 | 0.167 | 18.89 | 1.41E-79  | 5.20E-78  | DN |
| CCNG2   | 292  | 2.57 | 0.130 | 19.84 | 1.32E-87  | 5.42E-86  | DN |
| SYNE1   | 246  | 3.42 | 0.163 | 20.99 | 8.95E-98  | 4.29E-96  | DN |
| BST2    | 286  | 3.16 | 0.146 | 21.58 | 2.52E-103 | 1.33E-101 | DN |
| TNIK    | 369  | 2.62 | 0.119 | 21.99 | 3.95E-107 | 2.19E-105 | DN |
| DPYSL3  | 341  | 5.77 | 0.256 | 22.58 | 6.59E-113 | 3.85E-111 | DN |
| NRCAM   | 444  | 2.58 | 0.110 | 23.47 | 8.99E-122 | 5.86E-120 | DN |
| SRGN    | 488  | 2.56 | 0.105 | 24.36 | 4.85E-131 | 3.60E-129 | DN |
| DOCK10  | 593  | 2.53 | 0.092 | 27.42 | 1.44E-165 | 1.54E-163 | DN |
| EPB41L2 | 1542 | 8.75 | 0.318 | 27.51 | 1.22E-166 | 1.33E-164 | DN |
| FHOD3   | 407  | 3.81 | 0.138 | 27.54 | 5.35E-167 | 5.87E-165 | DN |
| TNC     | 1573 | 3.21 | 0.113 | 28.45 | 4.47E-178 | 5.38E-176 | DN |
| LCP1    | 1055 | 7.03 | 0.217 | 32.43 | 1.17E-230 | 2.39E-228 | DN |
| BCAT1   | 1056 | 6.73 | 0.197 | 34.22 | 1.28E-256 | 3.24E-254 | DN |
| NUAK1   | 675  | 3.98 | 0.115 | 34.53 | 2.95E-261 | 7.63E-259 | DN |
| PCSK9   | 1513 | 2.62 | 0.060 | 43.72 | 0         | 0         | DN |



**Supplementary Table 3 (PC9 model)**

|        |        |      |       |            |   |   |    |
|--------|--------|------|-------|------------|---|---|----|
| SPOCK1 | 1349   | 3.29 | 0.071 | 46.57      | 0 | 0 | DN |
| CACNG6 | 1943   | 2.74 | 0.054 | 50.35      | 0 | 0 | DN |
| STC2   | 2930   | 2.51 | 0.046 | 54.15      | 0 | 0 | DN |
| L1CAM  | 4978   | 2.44 | 0.039 | 62.29      | 0 | 0 | DN |
| FN1    | 126016 | 4.74 | 0.022 | 217.7<br>6 | 0 | 0 | DN |

**Supplementary Table 3:** Shown are genes that are significantly differentially expressed between PC9-derived BrM and Tr-BrM cell lines identified by RNA-sequencing. Differential expression statistics from DESeq2 analysis are included for all significantly differentially expressed genes. See accompanying Figure 2.

Supplementary Table 4 (H1650 model)

| ensembl_gene_id | external_gene | description                                                                          | baseMean | log2FoldCh | lfcSE  | stat   | pvalue | padj |
|-----------------|---------------|--------------------------------------------------------------------------------------|----------|------------|--------|--------|--------|------|
| ENSG00000128422 | KRT17         | keratin 17 [Source:HGNC Symbol;Acc:HGNC:6427]                                        | 15990    | -4.27      | 0.0338 | -126.4 | 0      | 0    |
| ENSG00000160932 | LY6E          | lymphocyte antigen 6 family member E [Source:HGNC Symbol;Acc:HGNC:6727]              | 15318    | -2.92      | 0.0311 | -93.8  | 0      | 0    |
| ENSG00000115414 | FN1           | fibronectin 1 [Source:HGNC Symbol;Acc:HGNC:3778]                                     | 39749    | -1.85      | 0.0272 | -67.9  | 0      | 0    |
| ENSG00000101144 | BMP7          | bone morphogenetic protein 7 [Source:HGNC Symbol;Acc:HGNC:1074]                      | 4603     | -2.49      | 0.0381 | -65.4  | 0      | 0    |
| ENSG00000167755 | KLK6          | kallikrein related peptidase 6 [Source:HGNC Symbol;Acc:HGNC:6367]                    | 5153     | -2.34      | 0.0365 | -64.1  | 0      | 0    |
| ENSG00000130203 | APOE          | apolipoprotein E [Source:HGNC Symbol;Acc:HGNC:613]                                   | 2452     | -3.65      | 0.0612 | -59.7  | 0      | 0    |
| ENSG00000205420 | KRT6A         | keratin 6A [Source:HGNC Symbol;Acc:HGNC:6443]                                        | 5141     | -2.12      | 0.0369 | -57.5  | 0      | 0    |
| ENSG00000137699 | TRIM29        | tripartite motif containing 29 [Source:HGNC Symbol;Acc:HGNC:17274]                   | 7519     | -1.94      | 0.0343 | -56.6  | 0      | 0    |
| ENSG00000163209 | SPRR3         | small proline rich protein 3 [Source:HGNC Symbol;Acc:HGNC:11268]                     | 2221     | -6.17      | 0.1161 | -53.1  | 0      | 0    |
| ENSG00000126016 | AMOT          | angiominin [Source:HGNC Symbol;Acc:HGNC:17810]                                       | 1628     | -4.23      | 0.0812 | -52.1  | 0      | 0    |
| ENSG00000120885 | CLU           | clusterin [Source:HGNC Symbol;Acc:HGNC:2095]                                         | 3286     | -2.23      | 0.0429 | -52.0  | 0      | 0    |
| ENSG00000218336 | TENM3         | teneurin transmembrane protein 3 [Source:HGNC Symbol;Acc:HGNC:29944]                 | 1477     | -3.68      | 0.0729 | -50.4  | 0      | 0    |
| ENSG00000079215 | SLC1A3        | solute carrier family 1 member 3 [Source:HGNC Symbol;Acc:HGNC:10941]                 | 1982     | -2.82      | 0.0563 | -50.1  | 0      | 0    |
| ENSG00000099194 | SCD           | stearoyl-CoA desaturase [Source:HGNC Symbol;Acc:HGNC:10571]                          | 13692    | -1.33      | 0.0270 | -49.5  | 0      | 0    |
| ENSG00000197122 | SRC           | SRC proto-oncogene, non-receptor tyrosine kinase [Source:HGNC Symbol;Acc:HGNC:11283] | 3131     | -2.02      | 0.0423 | -47.7  | 0      | 0    |
| ENSG00000095739 | BAMBI         | BMP and activin membrane bound inhibitor [Source:HGNC Symbol;Acc:HGNC:30251]         | 2101     | -2.50      | 0.0523 | -47.7  | 0      | 0    |
| ENSG00000163520 | FBLN2         | fibulin 2 [Source:HGNC Symbol;Acc:HGNC:3601]                                         | 1695     | -2.88      | 0.0619 | -46.6  | 0      | 0    |
| ENSG00000168542 | COL3A1        | collagen type III alpha 1 chain [Source:HGNC Symbol;Acc:HGNC:2201]                   | 1496     | -3.26      | 0.0704 | -46.3  | 0      | 0    |
| ENSG00000135842 | NIBAN1        | niban apoptosis regulator 1 [Source:HGNC Symbol;Acc:HGNC:16784]                      | 1445     | -3.15      | 0.0685 | -46.0  | 0      | 0    |
| ENSG00000136758 | YME1L1        | YME1 like 1 ATPase [Source:HGNC Symbol;Acc:HGNC:12843]                               | 9576     | -1.39      | 0.0302 | -46.0  | 0      | 0    |
| ENSG00000162981 | LRATD1        | LRAT domain containing 1 [Source:HGNC Symbol;Acc:HGNC:20743]                         | 1384     | -5.45      | 0.1197 | -45.5  | 0      | 0    |
| ENSG00000124466 | LYPD3         | LY6/PLAUR domain containing 3 [Source:HGNC Symbol;Acc:HGNC:24880]                    | 4608     | -1.76      | 0.0392 | -45.0  | 0      | 0    |
| ENSG00000136695 | IL36RN        | interleukin 36 receptor antagonist [Source:HGNC Symbol;Acc:HGNC:15561]               | 1119     | -4.64      | 0.1037 | -44.8  | 0      | 0    |
| ENSG00000150594 | ADRA2A        | adrenoceptor alpha 2A [Source:HGNC Symbol;Acc:HGNC:281]                              | 1227     | -3.73      | 0.0851 | -43.9  | 0      | 0    |
| ENSG00000111799 | COL12A1       | collagen type XII alpha 1 chain [Source:HGNC Symbol;Acc:HGNC:2188]                   | 3814     | -1.70      | 0.0397 | -42.9  | 0      | 0    |
| ENSG00000066468 | FGFR2         | fibroblast growth factor receptor 2 [Source:HGNC Symbol;Acc:HGNC:3689]               | 2748     | -1.89      | 0.0440 | -42.9  | 0      | 0    |
| ENSG00000110492 | MDK           | midkine [Source:HGNC Symbol;Acc:HGNC:6972]                                           | 1592     | -2.35      | 0.0567 | -41.4  | 0      | 0    |
| ENSG00000153993 | SEMA3D        | semaphorin 3D [Source:HGNC Symbol;Acc:HGNC:10726]                                    | 2199     | -1.99      | 0.0483 | -41.2  | 0      | 0    |
| ENSG00000166165 | CKB           | creatine kinase B [Source:HGNC Symbol;Acc:HGNC:1991]                                 | 3931     | -1.77      | 0.0431 | -41.0  | 0      | 0    |
| ENSG00000140465 | CYP1A1        | cytochrome P450 family 1 subfamily A member 1 [Source:HGNC Symbol;Acc:HGNC:2595]     | 1327     | -2.63      | 0.0646 | -40.8  | 0      | 0    |
| ENSG00000101670 | LIPG          | lipase G, endothelial type [Source:HGNC Symbol;Acc:HGNC:6623]                        | 909      | -4.21      | 0.1034 | -40.7  | 0      | 0    |
| ENSG00000170759 | KIF5B         | kinesin family member 5B [Source:HGNC Symbol;Acc:HGNC:6324]                          | 10358    | -1.29      | 0.0317 | -40.6  | 0      | 0    |
| ENSG00000137975 | CLCA2         | chloride channel accessory 2 [Source:HGNC Symbol;Acc:HGNC:2016]                      | 1575     | -2.31      | 0.0572 | -40.4  | 0      | 0    |
| ENSG00000115468 | EFHD1         | EF-hand domain family member D1 [Source:HGNC Symbol;Acc:HGNC:29556]                  | 1788     | -2.21      | 0.0546 | -40.4  | 0      | 0    |
| ENSG00000143061 | IGSF3         | immunoglobulin superfamily member 3 [Source:HGNC Symbol;Acc:HGNC:5950]               | 3176     | -1.62      | 0.0405 | -40.1  | 0      | 0    |
| ENSG00000086570 | FAT2          | FAT atypical cadherin 2 [Source:HGNC Symbol;Acc:HGNC:3596]                           | 1824     | -7.32      | 0.1825 | -40.1  | 0      | 0    |
| ENSG00000113396 | SLC27A6       | solute carrier family 27 member 6 [Source:HGNC Symbol;Acc:HGNC:11000]                | 1056     | -3.01      | 0.0762 | -39.5  | 0      | 0    |
| ENSG00000123572 | NRK           | Nik related kinase [Source:HGNC Symbol;Acc:HGNC:25391]                               | 872      | -3.64      | 0.0933 | -39.0  | 0      | 0    |
| ENSG00000171617 | ENC1          | ectodermal-neural cortex 1 [Source:HGNC Symbol;Acc:HGNC:3345]                        | 5031     | -1.43      | 0.0366 | -39.0  | 0      | 0    |
| ENSG00000131037 | EPS8L1        | EPS8 like 1 [Source:HGNC Symbol;Acc:HGNC:21295]                                      | 856      | -4.22      | 0.1081 | -39.0  | 0      | 0    |
| ENSG00000095787 | WAC           | WW domain containing adaptor with coiled-coil [Source:HGNC Symbol;Acc:HGNC:17327]    | 5509     | -1.41      | 0.0362 | -39.0  | 0      | 0    |

|                 |          |                                                                                                           |       |       |        |       |          |          |
|-----------------|----------|-----------------------------------------------------------------------------------------------------------|-------|-------|--------|-------|----------|----------|
| ENSG00000163347 | CLDN1    | claudin 1 [Source:HGNC Symbol;Acc:HGNC:2032]                                                              | 3213  | -1.53 | 0.0392 | -38.9 | 0        | 0        |
| ENSG00000088305 | DNMT3B   | DNA methyltransferase 3 beta [Source:HGNC Symbol;Acc:HGNC:2979]                                           | 1448  | -2.18 | 0.0581 | -37.5 | 5.5E-308 | 1.0E-305 |
| ENSG00000213626 | LBH      | LBH regulator of WNT signaling pathway [Source:HGNC Symbol;Acc:HGNC:29532]                                | 1985  | -1.88 | 0.0506 | -37.1 | 5.4E-302 | 9.8E-300 |
| ENSG00000143217 | NECTIN4  | nectin cell adhesion molecule 4 [Source:HGNC Symbol;Acc:HGNC:19688]                                       | 1191  | -2.54 | 0.0685 | -37.1 | 5.1E-301 | 9.1E-299 |
| ENSG00000164687 | FABP5    | fatty acid binding protein 5 [Source:HGNC Symbol;Acc:HGNC:3560]                                           | 2556  | -2.11 | 0.0569 | -37.1 | 6.7E-301 | 1.2E-298 |
| ENSG00000059804 | SLC2A3   | solute carrier family 2 member 3 [Source:HGNC Symbol;Acc:HGNC:11007]                                      | 1997  | -1.87 | 0.0507 | -36.8 | 6.6E-297 | 1.1E-294 |
| ENSG00000187210 | GCNT1    | glucosaminyl (N-acetyl) transferase 1 [Source:HGNC Symbol;Acc:HGNC:4203]                                  | 1091  | -2.72 | 0.0743 | -36.6 | 4.7E-293 | 8.2E-291 |
| ENSG00000211584 | SLC48A1  | solute carrier family 48 member 1 [Source:HGNC Symbol;Acc:HGNC:26035]                                     | 1085  | -2.46 | 0.0681 | -36.1 | 1.9E-285 | 3.2E-283 |
| ENSG00000149418 | ST14     | ST14 transmembrane serine protease matriptase [Source:HGNC Symbol;Acc:HGNC:11344]                         | 18510 | -0.86 | 0.0239 | -36.0 | 2.3E-283 | 3.8E-281 |
| ENSG00000135048 | CEMIP2   | cell migration inducing hyaluronidase 2 [Source:HGNC Symbol;Acc:HGNC:11869]                               | 6394  | -1.19 | 0.0333 | -35.8 | 9.5E-281 | 1.6E-278 |
| ENSG00000204323 | SMIM5    | small integral membrane protein 5 [Source:HGNC Symbol;Acc:HGNC:40030]                                     | 761   | -3.36 | 0.0942 | -35.7 | 5.0E-279 | 8.2E-277 |
| ENSG00000116679 | IVNS1ABP | influenza virus NS1A binding protein [Source:HGNC Symbol;Acc:HGNC:16951]                                  | 4294  | -1.29 | 0.0363 | -35.6 | 8.0E-278 | 1.3E-275 |
| ENSG00000144452 | ABCA12   | ATP binding cassette subfamily A member 12 [Source:HGNC Symbol;Acc:HGNC:14637]                            | 796   | -3.17 | 0.0892 | -35.6 | 3.8E-277 | 6.1E-275 |
| ENSG00000142910 | TINAGL1  | tubulointerstitial nephritis antigen like 1 [Source:HGNC Symbol;Acc:HGNC:19168]                           | 5916  | -1.64 | 0.0461 | -35.5 | 1.0E-276 | 1.7E-274 |
| ENSG00000128591 | FLNC     | filamin C [Source:HGNC Symbol;Acc:HGNC:3756]                                                              | 2081  | -1.99 | 0.0564 | -35.3 | 6.4E-273 | 1.0E-270 |
| ENSG00000169851 | PCDH7    | protocadherin 7 [Source:HGNC Symbol;Acc:HGNC:8659]                                                        | 1137  | -2.30 | 0.0657 | -35.0 | 2.7E-268 | 4.1E-266 |
| ENSG00000204103 | MAFB     | MAF bZIP transcription factor B [Source:HGNC Symbol;Acc:HGNC:6408]                                        | 2077  | -1.95 | 0.0556 | -35.0 | 6.6E-268 | 1.0E-265 |
| ENSG00000060656 | PTPRU    | protein tyrosine phosphatase receptor type U [Source:HGNC Symbol;Acc:HGNC:9683]                           | 2531  | -1.62 | 0.0466 | -34.8 | 7.1E-266 | 1.1E-263 |
| ENSG00000165757 | JCAD     | junctional cadherin 5 associated [Source:HGNC Symbol;Acc:HGNC:29283]                                      | 1396  | -2.11 | 0.0606 | -34.8 | 1.6E-265 | 2.3E-263 |
| ENSG00000087586 | AURKA    | aurora kinase A [Source:HGNC Symbol;Acc:HGNC:11393]                                                       | 7138  | -1.16 | 0.0334 | -34.7 | 2.0E-264 | 3.0E-262 |
| ENSG00000148798 | INA      | internexin neuronal intermediate filament protein alpha [Source:HGNC Symbol;Acc:HGNC:6057]                | 6359  | -1.21 | 0.0353 | -34.3 | 7.2E-258 | 1.0E-255 |
| ENSG00000175567 | UCP2     | uncoupling protein 2 [Source:HGNC Symbol;Acc:HGNC:12518]                                                  | 2384  | -1.52 | 0.0442 | -34.3 | 2.2E-257 | 3.2E-255 |
| ENSG00000172478 | MAB21L4  | mab-21 like 4 [Source:HGNC Symbol;Acc:HGNC:26216]                                                         | 1221  | -2.16 | 0.0632 | -34.2 | 7.4E-256 | 1.0E-253 |
| ENSG00000141753 | IGFBP4   | insulin like growth factor binding protein 4 [Source:HGNC Symbol;Acc:HGNC:5473]                           | 2916  | -1.43 | 0.0420 | -34.0 | 3.8E-253 | 5.2E-251 |
| ENSG00000163629 | PTPN13   | protein tyrosine phosphatase non-receptor type 13 [Source:HGNC Symbol;Acc:HGNC:9646]                      | 2389  | -1.55 | 0.0457 | -33.9 | 8.8E-252 | 1.2E-249 |
| ENSG00000076716 | GPC4     | glypican 4 [Source:HGNC Symbol;Acc:HGNC:4452]                                                             | 615   | -4.10 | 0.1216 | -33.7 | 4.3E-249 | 5.8E-247 |
| ENSG00000182492 | BGN      | biglycan [Source:HGNC Symbol;Acc:HGNC:1044]                                                               | 680   | -5.24 | 0.1565 | -33.5 | 9.5E-246 | 1.3E-243 |
| ENSG00000101193 | GID8     | GID complex subunit 8 homolog [Source:HGNC Symbol;Acc:HGNC:15857]                                         | 4486  | -1.15 | 0.0347 | -33.2 | 6.1E-242 | 7.8E-240 |
| ENSG00000137747 | TMPRSS13 | transmembrane serine protease 13 [Source:HGNC Symbol;Acc:HGNC:29808]                                      | 1437  | -1.93 | 0.0581 | -33.2 | 8.1E-242 | 1.0E-239 |
| ENSG00000019186 | CYP24A1  | cytochrome P450 family 24 subfamily A member 1 [Source:HGNC Symbol;Acc:HGNC:2602]                         | 621   | -4.78 | 0.1441 | -33.2 | 5.0E-241 | 6.3E-239 |
| ENSG00000173391 | OLR1     | oxidized low density lipoprotein receptor 1 [Source:HGNC Symbol;Acc:HGNC:8133]                            | 646   | -5.06 | 0.1541 | -32.8 | 1.4E-236 | 1.7E-234 |
| ENSG00000136754 | ABI1     | abl interactor 1 [Source:HGNC Symbol;Acc:HGNC:11320]                                                      | 4670  | -1.15 | 0.0352 | -32.8 | 6.4E-236 | 7.7E-234 |
| ENSG00000116990 | MYCL     | MYCL proto-oncogene, bHLH transcription factor [Source:HGNC Symbol;Acc:HGNC:7555]                         | 618   | -3.40 | 0.1042 | -32.6 | 2.8E-233 | 3.3E-231 |
| ENSG00000181143 | MUC16    | mucin 16, cell surface associated [Source:HGNC Symbol;Acc:HGNC:15582]                                     | 613   | -4.75 | 0.1457 | -32.6 | 1.5E-232 | 1.8E-230 |
| ENSG00000166535 | A2ML1    | alpha-2-macroglobulin like 1 [Source:HGNC Symbol;Acc:HGNC:23336]                                          | 3711  | -1.22 | 0.0374 | -32.5 | 1.0E-231 | 1.2E-229 |
| ENSG00000132470 | ITGB4    | integrin subunit beta 4 [Source:HGNC Symbol;Acc:HGNC:6158]                                                | 7353  | -0.94 | 0.0291 | -32.4 | 6.9E-230 | 7.9E-228 |
| ENSG00000153404 | PLEKHG4B | pleckstrin homology and RhoGEF domain containing G4B [Source:HGNC Symbol;Acc:HGNC:29399]                  | 619   | -3.51 | 0.1086 | -32.3 | 1.9E-229 | 2.2E-227 |
| ENSG00000128268 | MGAT3    | beta-1,4-mannosyl-glycoprotein 4-beta-N-acetylglucosaminyltransferase [Source:HGNC Symbol;Acc:HGNC:10498] | 581   | -4.13 | 0.1282 | -32.2 | 9.9E-228 | 1.1E-225 |
| ENSG00000143546 | S100A8   | S100 calcium binding protein A8 [Source:HGNC Symbol;Acc:HGNC:10498]                                       | 1441  | -2.19 | 0.0682 | -32.2 | 4.5E-227 | 5.1E-225 |
| ENSG00000172594 | SMPDL3A  | sphingomyelin phosphodiesterase acid like 3A [Source:HGNC Symbol;Acc:HGNC:17389]                          | 567   | -4.13 | 0.1285 | -32.2 | 6.7E-227 | 7.5E-225 |
| ENSG00000087510 | TFAP2C   | transcription factor AP-2 gamma [Source:HGNC Symbol;Acc:HGNC:11744]                                       | 2315  | -1.42 | 0.0450 | -31.7 | 2.0E-220 | 2.1E-218 |
| ENSG00000137266 | SLC22A23 | solute carrier family 22 member 23 [Source:HGNC Symbol;Acc:HGNC:21106]                                    | 1016  | -2.35 | 0.0741 | -31.7 | 3.8E-220 | 4.2E-218 |

|                 |          |                                                                                               |       |       |        |       |          |          |
|-----------------|----------|-----------------------------------------------------------------------------------------------|-------|-------|--------|-------|----------|----------|
| ENSG00000163453 | IGFBP7   | insulin like growth factor binding protein 7 [Source:HGNC Symbol;Acc:HGNC:5476]               | 712   | -3.16 | 0.1002 | -31.6 | 6.7E-219 | 7.2E-217 |
| ENSG00000169550 | MUC15    | mucin 15, cell surface associated [Source:HGNC Symbol;Acc:HGNC:14956]                         | 685   | -2.86 | 0.0914 | -31.3 | 1.6E-215 | 1.7E-213 |
| ENSG00000136153 | LMO7     | LIM domain 7 [Source:HGNC Symbol;Acc:HGNC:6646]                                               | 1829  | -1.71 | 0.0549 | -31.1 | 3.1E-212 | 3.3E-210 |
| ENSG00000164930 | FZD6     | frizzled class receptor 6 [Source:HGNC Symbol;Acc:HGNC:4044]                                  | 2848  | -1.24 | 0.0401 | -30.9 | 5.2E-209 | 5.4E-207 |
| ENSG00000117115 | PADI2    | peptidyl arginine deiminase 2 [Source:HGNC Symbol;Acc:HGNC:18341]                             | 521   | -4.53 | 0.1473 | -30.8 | 5.2E-208 | 5.4E-206 |
| ENSG00000185551 | NR2F2    | nuclear receptor subfamily 2 group F member 2 [Source:HGNC Symbol;Acc:HGNC:7976]              | 1535  | -1.88 | 0.0615 | -30.6 | 3.5E-205 | 3.6E-203 |
| ENSG00000177494 | ZBED2    | zinc finger BED-type containing 2 [Source:HGNC Symbol;Acc:HGNC:20710]                         | 560   | -3.87 | 0.1269 | -30.5 | 2.9E-204 | 2.9E-202 |
| ENSG00000064787 | BCAS1    | brain enriched myelin associated protein 1 [Source:HGNC Symbol;Acc:HGNC:974]                  | 522   | -4.88 | 0.1608 | -30.3 | 5.4E-202 | 5.3E-200 |
| ENSG00000260032 | NORAD    | non-coding RNA activated by DNA damage [Source:HGNC Symbol;Acc:HGNC:44311]                    | 10662 | -0.82 | 0.0271 | -30.2 | 2.6E-200 | 2.5E-198 |
| ENSG00000224940 | PRRT4    | proline rich transmembrane protein 4 [Source:HGNC Symbol;Acc:HGNC:37280]                      | 568   | -2.98 | 0.0997 | -29.8 | 1.1E-195 | 1.0E-193 |
| ENSG00000102409 | BEX4     | brain expressed X-linked 4 [Source:HGNC Symbol;Acc:HGNC:25475]                                | 474   | -3.93 | 0.1329 | -29.5 | 8.8E-192 | 8.2E-190 |
| ENSG00000130508 | PXDN     | peroxidasin [Source:HGNC Symbol;Acc:HGNC:14966]                                               | 1859  | -1.61 | 0.0545 | -29.5 | 1.7E-191 | 1.6E-189 |
| ENSG00000134317 | GRHL1    | grainyhead like transcription factor 1 [Source:HGNC Symbol;Acc:HGNC:17923]                    | 897   | -2.24 | 0.0760 | -29.5 | 3.2E-191 | 2.9E-189 |
| ENSG00000160145 | KALRN    | kalirin RhoGEF kinase [Source:HGNC Symbol;Acc:HGNC:4814]                                      | 466   | -3.76 | 0.1287 | -29.2 | 5.3E-188 | 4.7E-186 |
| ENSG00000106066 | CPVL     | carboxypeptidase vitellogenic like [Source:HGNC Symbol;Acc:HGNC:14399]                        | 800   | -6.78 | 0.2324 | -29.2 | 5.3E-187 | 4.6E-185 |
| ENSG00000137393 | RNF144B  | ring finger protein 144B [Source:HGNC Symbol;Acc:HGNC:21578]                                  | 649   | -2.60 | 0.0895 | -29.0 | 1.7E-185 | 1.5E-183 |
| ENSG00000163207 | IVL      | involucrin [Source:HGNC Symbol;Acc:HGNC:6187]                                                 | 2728  | -1.42 | 0.0491 | -29.0 | 4.5E-185 | 3.9E-183 |
| ENSG00000082397 | EPB41L3  | erythrocyte membrane protein band 4.1 like 3 [Source:HGNC Symbol;Acc:HGNC:3380]               | 495   | -5.08 | 0.1750 | -29.0 | 5.6E-185 | 4.8E-183 |
| ENSG00000163283 | ALPP     | alkaline phosphatase, placental [Source:HGNC Symbol;Acc:HGNC:439]                             | 8513  | -0.90 | 0.0310 | -29.0 | 7.5E-185 | 6.4E-183 |
| ENSG00000143382 | ADAMTSL4 | ADAMTS like 4 [Source:HGNC Symbol;Acc:HGNC:19706]                                             | 864   | -2.29 | 0.0792 | -28.9 | 3.4E-184 | 2.9E-182 |
| ENSG00000179750 | APOBEC3B | apolipoprotein B mRNA editing enzyme catalytic subunit 3B [Source:HGNC Symbol;Acc:HGNC:17352] | 2145  | -1.41 | 0.0490 | -28.9 | 2.1E-183 | 1.8E-181 |
| ENSG00000164292 | RHOBTB3  | Rho related BTB domain containing 3 [Source:HGNC Symbol;Acc:HGNC:18757]                       | 5696  | -0.96 | 0.0333 | -28.8 | 5.2E-183 | 4.3E-181 |
| ENSG00000069812 | HES2     | hes family bHLH transcription factor 2 [Source:HGNC Symbol;Acc:HGNC:16005]                    | 455   | -4.53 | 0.1577 | -28.7 | 1.1E-181 | 8.8E-180 |
| ENSG00000187094 | CCK      | cholecystokinin [Source:HGNC Symbol;Acc:HGNC:1569]                                            | 757   | -2.68 | 0.0932 | -28.7 | 1.8E-181 | 1.5E-179 |
| ENSG00000150093 | ITGB1    | integrin subunit beta 1 [Source:HGNC Symbol;Acc:HGNC:6153]                                    | 40872 | -0.61 | 0.0212 | -28.7 | 2.7E-181 | 2.2E-179 |
| ENSG00000025772 | TOMM34   | translocase of outer mitochondrial membrane 34 [Source:HGNC Symbol;Acc:HGNC:15746]            | 2435  | -1.38 | 0.0483 | -28.6 | 2.1E-180 | 1.7E-178 |
| ENSG00000166974 | MAPRE2   | microtubule associated protein RP/EB family member 2 [Source:HGNC Symbol;Acc:HGNC:6891]       | 799   | -2.23 | 0.0778 | -28.6 | 2.5E-180 | 2.1E-178 |
| ENSG00000169047 | IRS1     | insulin receptor substrate 1 [Source:HGNC Symbol;Acc:HGNC:6125]                               | 989   | -2.00 | 0.0701 | -28.5 | 7.1E-179 | 5.7E-177 |
| ENSG00000105357 | MYH14    | myosin heavy chain 14 [Source:HGNC Symbol;Acc:HGNC:23212]                                     | 11425 | -0.85 | 0.0299 | -28.5 | 1.2E-178 | 9.8E-177 |
| ENSG00000186350 | RXRA     | retinoid X receptor alpha [Source:HGNC Symbol;Acc:HGNC:10477]                                 | 3390  | -1.08 | 0.0381 | -28.5 | 1.9E-178 | 1.5E-176 |
| ENSG00000107897 | ACBD5    | acyl-CoA binding domain containing 5 [Source:HGNC Symbol;Acc:HGNC:23338]                      | 2369  | -1.25 | 0.0440 | -28.3 | 2.2E-176 | 1.7E-174 |
| ENSG00000160796 | NBEAL2   | neurobeachin like 2 [Source:HGNC Symbol;Acc:HGNC:31928]                                       | 1922  | -1.36 | 0.0484 | -28.2 | 4.4E-175 | 3.4E-173 |
| ENSG00000169710 | FASN     | fatty acid synthase [Source:HGNC Symbol;Acc:HGNC:3594]                                        | 9306  | -0.86 | 0.0306 | -28.2 | 2.2E-174 | 1.7E-172 |
| ENSG00000154734 | ADAMTSL1 | ADAM metallopeptidase with thrombospondin type 1 motif 1 [Source:HGNC Symbol;Acc:HGNC:217]    | 437   | -4.72 | 0.1685 | -28.0 | 2.5E-172 | 2.0E-170 |
| ENSG00000163293 | NIPAL1   | NIPA like domain containing 1 [Source:HGNC Symbol;Acc:HGNC:27194]                             | 674   | -2.35 | 0.0839 | -28.0 | 6.4E-172 | 4.9E-170 |
| ENSG00000183742 | MACC1    | MET transcriptional regulator MACC1 [Source:HGNC Symbol;Acc:HGNC:30215]                       | 1573  | -1.52 | 0.0546 | -27.8 | 2.9E-170 | 2.2E-168 |
| ENSG00000198728 | LDB1     | LIM domain binding 1 [Source:HGNC Symbol;Acc:HGNC:6532]                                       | 2383  | -1.20 | 0.0435 | -27.7 | 1.0E-168 | 7.9E-167 |
| ENSG00000235750 | KIAA0040 | KIAA0040 [Source:HGNC Symbol;Acc:HGNC:28950]                                                  | 2663  | -1.16 | 0.0423 | -27.5 | 1.5E-166 | 1.1E-164 |
| ENSG00000172243 | CLEC7A   | C-type lectin domain containing 7A [Source:HGNC Symbol;Acc:HGNC:14558]                        | 866   | -2.04 | 0.0744 | -27.5 | 3.1E-166 | 2.3E-164 |
| ENSG00000101443 | WFDC2    | WAP four-disulfide core domain 2 [Source:HGNC Symbol;Acc:HGNC:15939]                          | 440   | -3.72 | 0.1356 | -27.4 | 1.7E-165 | 1.2E-163 |
| ENSG00000099246 | RAB18    | RAB18, member RAS oncogene family [Source:HGNC Symbol;Acc:HGNC:14244]                         | 3936  | -1.03 | 0.0375 | -27.4 | 2.9E-165 | 2.1E-163 |
| ENSG00000169635 | HIC2     | HIC ZBTB transcriptional repressor 2 [Source:HGNC Symbol;Acc:HGNC:18595]                      | 802   | -2.08 | 0.0760 | -27.4 | 3.9E-165 | 2.8E-163 |

|                 |                 |                                                                                         |       |       |        |       |          |          |
|-----------------|-----------------|-----------------------------------------------------------------------------------------|-------|-------|--------|-------|----------|----------|
| ENSG00000110400 | NECTIN1         | nectin cell adhesion molecule 1 [Source:HGNC Symbol;Acc:HGNC:9706]                      | 2433  | -1.41 | 0.0518 | -27.1 | 5.2E-162 | 3.8E-160 |
| ENSG00000170962 | PDGFD           | platelet derived growth factor D [Source:HGNC Symbol;Acc:HGNC:30620]                    | 473   | -3.30 | 0.1216 | -27.1 | 6.4E-162 | 4.6E-160 |
| ENSG00000158055 | GRHL3           | grainyhead like transcription factor 3 [Source:HGNC Symbol;Acc:HGNC:25839]              | 530   | -2.73 | 0.1012 | -27.0 | 7.0E-161 | 5.0E-159 |
| ENSG00000068650 | ATP11A          | ATPase phospholipid transporting 11A [Source:HGNC Symbol;Acc:HGNC:13552]                | 1534  | -1.52 | 0.0564 | -26.9 | 6.1E-160 | 4.3E-158 |
| ENSG00000134762 | DSC3            | desmocollin 3 [Source:HGNC Symbol;Acc:HGNC:3037]                                        | 1068  | -1.76 | 0.0656 | -26.8 | 6.9E-158 | 4.8E-156 |
| ENSG00000176531 | PHLDB3          | pleckstrin homology like domain family B member 3 [Source:HGNC Symbol;Acc:HGNC:30499]   | 1232  | -1.63 | 0.0609 | -26.8 | 8.8E-158 | 6.1E-156 |
| ENSG00000101199 | ARFGAP1         | ADP ribosylation factor GTPase activating protein 1 [Source:HGNC Symbol;Acc:HGNC:15852] | 6580  | -0.82 | 0.0307 | -26.8 | 1.2E-157 | 8.2E-156 |
| ENSG00000138449 | SLC40A1         | solute carrier family 40 member 1 [Source:HGNC Symbol;Acc:HGNC:10909]                   | 399   | -4.56 | 0.1707 | -26.7 | 3.7E-157 | 2.5E-155 |
| ENSG00000179361 | ARID3B          | AT-rich interaction domain 3B [Source:HGNC Symbol;Acc:HGNC:14350]                       | 548   | -2.57 | 0.0964 | -26.7 | 4.3E-157 | 2.9E-155 |
| ENSG00000101182 | PSMA7           | proteasome 20S subunit alpha 7 [Source:HGNC Symbol;Acc:HGNC:9536]                       | 23864 | -0.71 | 0.0268 | -26.7 | 1.3E-156 | 9.0E-155 |
| ENSG00000149658 | YTHDF1          | YTH N6-methyladenosine RNA binding protein 1 [Source:HGNC Symbol;Acc:HGNC:15867]        | 4182  | -0.92 | 0.0346 | -26.5 | 3.3E-155 | 2.2E-153 |
| ENSG00000152661 | GJA1            | gap junction protein alpha 1 [Source:HGNC Symbol;Acc:HGNC:4274]                         | 383   | -4.10 | 0.1547 | -26.5 | 5.7E-155 | 3.9E-153 |
| ENSG00000164050 | PLXNB1          | plexin B1 [Source:HGNC Symbol;Acc:HGNC:9103]                                            | 1956  | -1.28 | 0.0482 | -26.5 | 2.3E-154 | 1.6E-152 |
| ENSG00000150054 | MPP7            | membrane palmitoylated protein 7 [Source:HGNC Symbol;Acc:HGNC:26542]                    | 1297  | -1.54 | 0.0584 | -26.4 | 7.7E-154 | 5.1E-152 |
| ENSG00000167123 | CERCAM          | cerebral endothelial cell adhesion molecule [Source:HGNC Symbol;Acc:HGNC:23723]         | 3769  | -0.99 | 0.0379 | -26.2 | 1.8E-151 | 1.2E-149 |
| ENSG00000035862 | TIMP2           | TIMP metalloproteinase inhibitor 2 [Source:HGNC Symbol;Acc:HGNC:11821]                  | 5755  | -0.82 | 0.0315 | -26.2 | 3.6E-151 | 2.4E-149 |
| ENSG00000101134 | DOK5            | docking protein 5 [Source:HGNC Symbol;Acc:HGNC:16173]                                   | 769   | -2.07 | 0.0792 | -26.2 | 7.2E-151 | 4.7E-149 |
| ENSG00000115993 | TRAK2           | trafficking kinesin protein 2 [Source:HGNC Symbol;Acc:HGNC:13206]                       | 1691  | -1.47 | 0.0565 | -26.1 | 9.2E-150 | 5.9E-148 |
| ENSG00000065361 | ERBB3           | erb-b2 receptor tyrosine kinase 3 [Source:HGNC Symbol;Acc:HGNC:3431]                    | 1332  | -1.49 | 0.0574 | -26.0 | 1.7E-149 | 1.1E-147 |
| ENSG00000113161 | HMGCR           | 3-hydroxy-3-methylglutaryl-CoA reductase [Source:HGNC Symbol;Acc:HGNC:5006]             | 4210  | -0.91 | 0.0349 | -26.0 | 9.4E-149 | 6.1E-147 |
| ENSG00000123384 | LRP1            | LDL receptor related protein 1 [Source:HGNC Symbol;Acc:HGNC:6692]                       | 3473  | -1.28 | 0.0495 | -26.0 | 1.3E-148 | 8.4E-147 |
| ENSG00000132698 | RAB25           | RAB25, member RAS oncogene family [Source:HGNC Symbol;Acc:HGNC:18238]                   | 1667  | -1.38 | 0.0532 | -25.9 | 7.2E-148 | 4.6E-146 |
| ENSG00000123243 | ITIHS           | inter-alpha-trypsin inhibitor heavy chain 5 [Source:HGNC Symbol;Acc:HGNC:21449]         | 391   | -3.40 | 0.1320 | -25.8 | 1.1E-146 | 7.2E-145 |
| ENSG00000120539 | MASTL           | microtubule associated serine/threonine kinase like [Source:HGNC Symbol;Acc:HGNC:19042] | 2201  | -1.14 | 0.0444 | -25.7 | 6.9E-146 | 4.3E-144 |
| ENSG00000189143 | CLDN4           | claudin 4 [Source:HGNC Symbol;Acc:HGNC:2046]                                            | 10372 | -0.76 | 0.0295 | -25.6 | 6.2E-145 | 3.9E-143 |
| ENSG00000117595 | IRF6            | interferon regulatory factor 6 [Source:HGNC Symbol;Acc:HGNC:6121]                       | 1470  | -1.35 | 0.0528 | -25.6 | 6.3E-145 | 3.9E-143 |
| ENSG00000131747 | TOP2A           | DNA topoisomerase II alpha [Source:HGNC Symbol;Acc:HGNC:11989]                          | 9028  | -0.79 | 0.0308 | -25.6 | 1.4E-144 | 8.4E-143 |
| ENSG00000218416 | ENSG00000218416 | novel transcript, antisense to GPC1                                                     | 1517  | -1.44 | 0.0564 | -25.6 | 2.1E-144 | 1.3E-142 |
| ENSG00000152234 | ATP5F1A         | ATP synthase F1 subunit alpha [Source:HGNC Symbol;Acc:HGNC:823]                         | 8725  | -0.81 | 0.0319 | -25.5 | 1.1E-143 | 6.5E-142 |
| ENSG00000196218 | RYR1            | ryanodine receptor 1 [Source:HGNC Symbol;Acc:HGNC:10483]                                | 762   | -2.02 | 0.0796 | -25.4 | 1.5E-142 | 9.2E-141 |
| ENSG00000112992 | NNT             | nicotinamide nucleotide transhydrogenase [Source:HGNC Symbol;Acc:HGNC:7863]             | 677   | -2.14 | 0.0843 | -25.4 | 1.6E-142 | 9.4E-141 |
| ENSG00000074181 | NOTCH3          | notch receptor 3 [Source:HGNC Symbol;Acc:HGNC:7883]                                     | 3899  | -1.06 | 0.0422 | -25.2 | 6.3E-140 | 3.7E-138 |
| ENSG00000170775 | GPR37           | G protein-coupled receptor 37 [Source:HGNC Symbol;Acc:HGNC:4494]                        | 413   | -2.90 | 0.1151 | -25.2 | 1.1E-139 | 6.6E-138 |
| ENSG00000176834 | VSIG10          | V-set and immunoglobulin domain containing 10 [Source:HGNC Symbol;Acc:HGNC:26078]       | 1619  | -1.31 | 0.0521 | -25.1 | 5.0E-139 | 2.9E-137 |
| ENSG00000110921 | MVK             | mevalonate kinase [Source:HGNC Symbol;Acc:HGNC:7530]                                    | 1134  | -1.59 | 0.0632 | -25.1 | 6.4E-139 | 3.7E-137 |
| ENSG00000134243 | SORT1           | sortilin 1 [Source:HGNC Symbol;Acc:HGNC:11186]                                          | 2308  | -1.11 | 0.0441 | -25.1 | 1.3E-138 | 7.4E-137 |
| ENSG00000115525 | ST3GAL5         | ST3 beta-galactoside alpha-2,3-sialyltransferase 5 [Source:HGNC Symbol;Acc:HGNC:10872]  | 335   | -4.29 | 0.1713 | -25.1 | 1.7E-138 | 9.6E-137 |
| ENSG00000106484 | MEST            | mesoderm specific transcript [Source:HGNC Symbol;Acc:HGNC:7028]                         | 980   | -1.83 | 0.0730 | -25.0 | 4.5E-138 | 2.6E-136 |
| ENSG00000088756 | ARHGAP28        | Rho GTPase activating protein 28 [Source:HGNC Symbol;Acc:HGNC:25509]                    | 346   | -4.13 | 0.1650 | -25.0 | 5.6E-138 | 3.2E-136 |
| ENSG00000129151 | BBOX1           | gamma-butyrobetaine hydroxylase 1 [Source:HGNC Symbol;Acc:HGNC:964]                     | 341   | -3.93 | 0.1574 | -25.0 | 2.1E-137 | 1.2E-135 |
| ENSG00000148700 | ADD3            | adducin 3 [Source:HGNC Symbol;Acc:HGNC:245]                                             | 2701  | -1.05 | 0.0424 | -24.9 | 1.8E-136 | 1.0E-134 |
| ENSG00000182541 | LIMK2           | LIM domain kinase 2 [Source:HGNC Symbol;Acc:HGNC:6614]                                  | 4194  | -0.89 | 0.0358 | -24.8 | 3.8E-136 | 2.1E-134 |

|                 |                 |                                                                                                      |       |       |        |       |          |          |
|-----------------|-----------------|------------------------------------------------------------------------------------------------------|-------|-------|--------|-------|----------|----------|
| ENSG00000101421 | CHMP4B          | charged multivesicular body protein 4B [Source:HGNC Symbol;Acc:HGNC:16171]                           | 7308  | -0.79 | 0.0317 | -24.8 | 5.1E-136 | 2.8E-134 |
| ENSG00000122042 | UBL3            | ubiquitin like 3 [Source:HGNC Symbol;Acc:HGNC:12504]                                                 | 1330  | -1.60 | 0.0644 | -24.8 | 7.4E-136 | 4.1E-134 |
| ENSG00000099282 | TSPAN15         | tetraspanin 15 [Source:HGNC Symbol;Acc:HGNC:23298]                                                   | 1423  | -1.37 | 0.0554 | -24.8 | 1.1E-135 | 5.9E-134 |
| ENSG00000111859 | NEDD9           | neural precursor cell expressed, developmentally down-regulated 9 [Source:HGNC Symbol;Acc:HGNC:7138] | 712   | -2.03 | 0.0817 | -24.8 | 1.1E-135 | 6.3E-134 |
| ENSG00000275023 | MLLT6           | MLLT6, PHD finger containing [Source:HGNC Symbol;Acc:HGNC:7138]                                      | 1306  | -1.50 | 0.0607 | -24.8 | 3.1E-135 | 1.7E-133 |
| ENSG00000124702 | KLHDC3          | kelch domain containing 3 [Source:HGNC Symbol;Acc:HGNC:20704]                                        | 3177  | -0.99 | 0.0402 | -24.7 | 4.9E-135 | 2.7E-133 |
| ENSG00000135636 | DYSF            | dysferlin [Source:HGNC Symbol;Acc:HGNC:3097]                                                         | 2293  | -1.09 | 0.0443 | -24.7 | 7.7E-135 | 4.2E-133 |
| ENSG00000124429 | POF1B           | POF1B actin binding protein [Source:HGNC Symbol;Acc:HGNC:13711]                                      | 321   | -4.19 | 0.1715 | -24.4 | 5.8E-132 | 3.1E-130 |
| ENSG00000108639 | SYNGR2          | synaptogyrin 2 [Source:HGNC Symbol;Acc:HGNC:11499]                                                   | 2821  | -1.01 | 0.0414 | -24.3 | 9.2E-131 | 4.9E-129 |
| ENSG00000130702 | LAMA5           | laminin subunit alpha 5 [Source:HGNC Symbol;Acc:HGNC:6485]                                           | 20536 | -0.76 | 0.0313 | -24.3 | 1.2E-130 | 6.5E-129 |
| ENSG00000168824 | NSG1            | neuronal vesicle trafficking associated 1 [Source:HGNC Symbol;Acc:HGNC:18790]                        | 345   | -3.30 | 0.1357 | -24.3 | 1.6E-130 | 8.5E-129 |
| ENSG00000139998 | RAB15           | RAB15, member RAS oncogene family [Source:HGNC Symbol;Acc:HGNC:20150]                                | 2504  | -1.09 | 0.0449 | -24.3 | 2.4E-130 | 1.3E-128 |
| ENSG00000174808 | BTC             | betacellulin [Source:HGNC Symbol;Acc:HGNC:1121]                                                      | 347   | -3.45 | 0.1419 | -24.3 | 2.6E-130 | 1.4E-128 |
| ENSG00000101210 | EEF1A2          | eukaryotic translation elongation factor 1 alpha 2 [Source:HGNC Symbol;Acc:HGNC:3192]                | 15622 | -0.61 | 0.0254 | -24.2 | 6.3E-129 | 3.3E-127 |
| ENSG00000138829 | FBN2            | fibrillin 2 [Source:HGNC Symbol;Acc:HGNC:3604]                                                       | 452   | -6.26 | 0.2594 | -24.1 | 1.6E-128 | 8.1E-127 |
| ENSG00000178445 | GLDC            | glycine decarboxylase [Source:HGNC Symbol;Acc:HGNC:4313]                                             | 316   | -4.60 | 0.1911 | -24.1 | 5.5E-128 | 2.9E-126 |
| ENSG00000106541 | AGR2            | anterior gradient 2, protein disulphide isomerase family member [Source:HGNC Symbol;Acc:HGNC:328]    | 316   | -3.65 | 0.1519 | -24.0 | 3.0E-127 | 1.5E-125 |
| ENSG00000182606 | TRAK1           | trafficking kinesin protein 1 [Source:HGNC Symbol;Acc:HGNC:29947]                                    | 1598  | -1.26 | 0.0525 | -24.0 | 6.2E-127 | 3.2E-125 |
| ENSG00000197872 | CYRIA           | CYFIP related Rac1 interactor A [Source:HGNC Symbol;Acc:HGNC:25373]                                  | 474   | -2.50 | 0.1046 | -23.9 | 7.3E-126 | 3.7E-124 |
| ENSG00000101444 | AHCY            | adenosylhomocysteinase [Source:HGNC Symbol;Acc:HGNC:343]                                             | 9005  | -0.71 | 0.0297 | -23.8 | 1.6E-125 | 8.0E-124 |
| ENSG00000139629 | GALNT6          | polypeptide N-acetylgalactosaminyltransferase 6 [Source:HGNC Symbol;Acc:HGNC:4128]                   | 2375  | -1.07 | 0.0448 | -23.8 | 1.7E-125 | 8.8E-124 |
| ENSG00000189184 | PCDH18          | protocadherin 18 [Source:HGNC Symbol;Acc:HGNC:14268]                                                 | 302   | -4.10 | 0.1723 | -23.8 | 3.2E-125 | 1.6E-123 |
| ENSG00000130294 | KIF1A           | kinesin family member 1A [Source:HGNC Symbol;Acc:HGNC:888]                                           | 847   | -3.89 | 0.1634 | -23.8 | 3.3E-125 | 1.7E-123 |
| ENSG00000260401 | ENSG00000260401 | novel transcript, overlapping to P2RY2                                                               | 610   | -2.16 | 0.0906 | -23.8 | 3.4E-125 | 1.7E-123 |
| ENSG00000236609 | ZNF853          | zinc finger protein 853 [Source:HGNC Symbol;Acc:HGNC:21767]                                          | 523   | -2.22 | 0.0936 | -23.7 | 2.2E-124 | 1.1E-122 |
| ENSG00000109861 | CTSC            | cathepsin C [Source:HGNC Symbol;Acc:HGNC:2528]                                                       | 4238  | -0.92 | 0.0388 | -23.7 | 8.6E-124 | 4.3E-122 |
| ENSG00000167600 | CYP2S1          | cytochrome P450 family 2 subfamily S member 1 [Source:HGNC Symbol;Acc:HGNC:15654]                    | 449   | -2.49 | 0.1054 | -23.6 | 2.1E-123 | 1.0E-121 |
| ENSG00000138759 | FRAS1           | Fraser extracellular matrix complex subunit 1 [Source:HGNC Symbol;Acc:HGNC:19185]                    | 1845  | -1.13 | 0.0476 | -23.6 | 2.5E-123 | 1.2E-121 |
| ENSG00000115596 | WNT6            | Wnt family member 6 [Source:HGNC Symbol;Acc:HGNC:12785]                                              | 693   | -5.64 | 0.2390 | -23.6 | 3.5E-123 | 1.7E-121 |
| ENSG00000091986 | CCDC80          | coiled-coil domain containing 80 [Source:HGNC Symbol;Acc:HGNC:30649]                                 | 2629  | -0.96 | 0.0408 | -23.5 | 5.5E-122 | 2.7E-120 |
| ENSG00000135069 | PSAT1           | phosphoserine aminotransferase 1 [Source:HGNC Symbol;Acc:HGNC:19129]                                 | 4979  | -0.90 | 0.0382 | -23.4 | 1.5E-121 | 7.1E-120 |
| ENSG00000111275 | ALDH2           | aldehyde dehydrogenase 2 family member [Source:HGNC Symbol;Acc:HGNC:404]                             | 306   | -3.56 | 0.1524 | -23.4 | 5.1E-121 | 2.5E-119 |
| ENSG00000136155 | SCEL            | sciellin [Source:HGNC Symbol;Acc:HGNC:10573]                                                         | 690   | -1.88 | 0.0806 | -23.3 | 2.7E-120 | 1.3E-118 |
| ENSG00000175874 | CREG2           | cellular repressor of E1A stimulated genes 2 [Source:HGNC Symbol;Acc:HGNC:14272]                     | 293   | -3.95 | 0.1694 | -23.3 | 5.5E-120 | 2.6E-118 |
| ENSG00000168077 | SCARA3          | scavenger receptor class A member 3 [Source:HGNC Symbol;Acc:HGNC:19000]                              | 1716  | -1.16 | 0.0501 | -23.2 | 1.5E-119 | 7.0E-118 |
| ENSG00000135821 | GLUL            | glutamate-ammonia ligase [Source:HGNC Symbol;Acc:HGNC:4341]                                          | 6773  | -0.70 | 0.0302 | -23.2 | 2.0E-119 | 9.4E-118 |
| ENSG00000123892 | RAB38           | RAB38, member RAS oncogene family [Source:HGNC Symbol;Acc:HGNC:9776]                                 | 306   | -4.48 | 0.1929 | -23.2 | 2.5E-119 | 1.2E-117 |
| ENSG00000175868 | CALCB           | calcitonin related polypeptide beta [Source:HGNC Symbol;Acc:HGNC:1438]                               | 337   | -3.14 | 0.1352 | -23.2 | 2.9E-119 | 1.4E-117 |
| ENSG0000007866  | TEAD3           | TEA domain transcription factor 3 [Source:HGNC Symbol;Acc:HGNC:11716]                                | 2154  | -1.07 | 0.0463 | -23.2 | 3.3E-119 | 1.6E-117 |
| ENSG00000081479 | LRP2            | LDL receptor related protein 2 [Source:HGNC Symbol;Acc:HGNC:6694]                                    | 721   | -7.78 | 0.3365 | -23.1 | 2.7E-118 | 1.3E-116 |
| ENSG00000105223 | PLD3            | phospholipase D family member 3 [Source:HGNC Symbol;Acc:HGNC:17158]                                  | 3046  | -0.92 | 0.0397 | -23.1 | 4.6E-118 | 2.2E-116 |
| ENSG00000165105 | RASEF           | RAS and EF-hand domain containing [Source:HGNC Symbol;Acc:HGNC:26464]                                | 525   | -2.26 | 0.0980 | -23.1 | 6.4E-118 | 3.0E-116 |

|                 |          |                                                                                                     |       |       |        |       |          |          |
|-----------------|----------|-----------------------------------------------------------------------------------------------------|-------|-------|--------|-------|----------|----------|
| ENSG00000140403 | DNAJA4   | DnaI heat shock protein family (Hsp40) member A4 [Source:HGNC Symbol;Acc:HGNC:14885]                | 1067  | -1.45 | 0.0632 | -22.9 | 2.0E-116 | 9.1E-115 |
| ENSG00000197321 | SVIL     | supervillin [Source:HGNC Symbol;Acc:HGNC:11480]                                                     | 4317  | -0.88 | 0.0385 | -22.9 | 1.1E-115 | 5.2E-114 |
| ENSG00000052802 | MSMO1    | methylsterol monooxygenase 1 [Source:HGNC Symbol;Acc:HGNC:10545]                                    | 1617  | -1.19 | 0.0518 | -22.9 | 1.2E-115 | 5.4E-114 |
| ENSG00000147676 | MAL2     | mal, T cell differentiation protein 2 [Source:HGNC Symbol;Acc:HGNC:13634]                           | 15670 | -0.79 | 0.0349 | -22.8 | 5.0E-115 | 2.3E-113 |
| ENSG00000134755 | DSC2     | desmocollin 2 [Source:HGNC Symbol;Acc:HGNC:3036]                                                    | 3473  | -0.95 | 0.0415 | -22.8 | 8.7E-115 | 3.9E-113 |
| ENSG00000143324 | XPR1     | xenotropic and polytropic retrovirus receptor 1 [Source:HGNC Symbol;Acc:HGNC:12827]                 | 1541  | -1.21 | 0.0534 | -22.7 | 1.6E-114 | 7.4E-113 |
| ENSG00000135926 | TMBIM1   | transmembrane BAX inhibitor motif containing 1 [Source:HGNC Symbol;Acc:HGNC:23410]                  | 7177  | -0.69 | 0.0304 | -22.7 | 2.9E-114 | 1.3E-112 |
| ENSG00000102243 | VGLL1    | vestigial like family member 1 [Source:HGNC Symbol;Acc:HGNC:20985]                                  | 2134  | -1.06 | 0.0466 | -22.7 | 6.7E-114 | 3.0E-112 |
| ENSG00000112378 | PERP     | p53 apoptosis effector related to PMP22 [Source:HGNC Symbol;Acc:HGNC:17637]                         | 17924 | -0.57 | 0.0250 | -22.6 | 1.6E-113 | 7.0E-112 |
| ENSG00000103811 | CTSH     | cathepsin H [Source:HGNC Symbol;Acc:HGNC:2535]                                                      | 2797  | -1.16 | 0.0512 | -22.6 | 2.9E-113 | 1.3E-111 |
| ENSG00000141524 | TMC6     | transmembrane channel like 6 [Source:HGNC Symbol;Acc:HGNC:18021]                                    | 1777  | -1.10 | 0.0485 | -22.6 | 4.3E-113 | 1.9E-111 |
| ENSG00000058335 | RASGRF1  | Ras protein specific guanine nucleotide releasing factor 1 [Source:HGNC Symbol;Acc:HGNC:9875]       | 298   | -5.05 | 0.2235 | -22.6 | 4.7E-113 | 2.1E-111 |
| ENSG00000163362 | INAVA    | innate immunity activator [Source:HGNC Symbol;Acc:HGNC:25599]                                       | 504   | -2.23 | 0.0987 | -22.6 | 6.6E-113 | 2.9E-111 |
| ENSG00000131620 | ANO1     | anoctamin 1 [Source:HGNC Symbol;Acc:HGNC:21625]                                                     | 269   | -4.28 | 0.1897 | -22.6 | 1.2E-112 | 5.3E-111 |
| ENSG00000105538 | RASIP1   | Ras interacting protein 1 [Source:HGNC Symbol;Acc:HGNC:24716]                                       | 814   | -1.66 | 0.0737 | -22.5 | 1.4E-112 | 6.2E-111 |
| ENSG00000203485 | INF2     | inverted formin 2 [Source:HGNC Symbol;Acc:HGNC:23791]                                               | 2431  | -0.97 | 0.0431 | -22.5 | 2.1E-112 | 9.0E-111 |
| ENSG00000130703 | OSBPL2   | oxysterol binding protein like 2 [Source:HGNC Symbol;Acc:HGNC:15761]                                | 2561  | -0.96 | 0.0427 | -22.5 | 3.3E-112 | 1.4E-110 |
| ENSG00000164116 | GUCY1A1  | guanylate cyclase 1 soluble subunit alpha 1 [Source:HGNC Symbol;Acc:HGNC:4685]                      | 270   | -4.04 | 0.1796 | -22.5 | 5.1E-112 | 2.2E-110 |
| ENSG00000165125 | TRPV6    | transient receptor potential cation channel subfamily V member 6 [Source:HGNC Symbol;Acc:HGNC:140   | 272   | -3.85 | 0.1712 | -22.5 | 6.6E-112 | 2.8E-110 |
| ENSG00000150687 | PRSS23   | serine protease 23 [Source:HGNC Symbol;Acc:HGNC:14370]                                              | 16328 | -0.61 | 0.0270 | -22.4 | 1.5E-111 | 6.6E-110 |
| ENSG00000149657 | LSM14B   | LSM family member 14B [Source:HGNC Symbol;Acc:HGNC:15887]                                           | 2883  | -0.89 | 0.0398 | -22.4 | 9.2E-111 | 3.9E-109 |
| ENSG00000077420 | APBB1IP  | amyloid beta precursor protein binding family B member 1 interacting protein [Source:HGNC Symbol;Ac | 1160  | -1.37 | 0.0613 | -22.4 | 9.8E-111 | 4.2E-109 |
| ENSG00000101096 | NFATC2   | nuclear factor of activated T cells 2 [Source:HGNC Symbol;Acc:HGNC:7776]                            | 637   | -1.97 | 0.0882 | -22.3 | 1.6E-110 | 6.9E-109 |
| ENSG00000138434 | ITPRID2  | ITPR interacting domain containing 2 [Source:HGNC Symbol;Acc:HGNC:11319]                            | 7882  | -0.66 | 0.0296 | -22.3 | 2.1E-110 | 8.8E-109 |
| ENSG00000175591 | P2RY2    | purinergic receptor P2Y2 [Source:HGNC Symbol;Acc:HGNC:8541]                                         | 1436  | -1.29 | 0.0580 | -22.2 | 2.0E-109 | 8.4E-108 |
| ENSG00000006118 | TMEM132A | transmembrane protein 132A [Source:HGNC Symbol;Acc:HGNC:31092]                                      | 3384  | -1.09 | 0.0492 | -22.2 | 3.9E-109 | 1.6E-107 |
| ENSG00000104687 | GSR      | glutathione-disulfide reductase [Source:HGNC Symbol;Acc:HGNC:4623]                                  | 1791  | -1.09 | 0.0492 | -22.2 | 4.8E-109 | 2.0E-107 |
| ENSG00000166619 | BLCAP    | BLCAP apoptosis inducing factor [Source:HGNC Symbol;Acc:HGNC:1055]                                  | 7037  | -0.66 | 0.0296 | -22.2 | 6.3E-109 | 2.6E-107 |
| ENSG00000168564 | CDKN2AIP | CDKN2A interacting protein [Source:HGNC Symbol;Acc:HGNC:24325]                                      | 1201  | -1.29 | 0.0584 | -22.2 | 7.1E-109 | 2.9E-107 |
| ENSG00000061918 | GUCY1B1  | guanylate cyclase 1 soluble subunit beta 1 [Source:HGNC Symbol;Acc:HGNC:4687]                       | 313   | -3.18 | 0.1436 | -22.1 | 1.1E-108 | 4.6E-107 |
| ENSG00000105655 | ISYNA1   | inositol-3-phosphate synthase 1 [Source:HGNC Symbol;Acc:HGNC:29821]                                 | 1559  | -1.19 | 0.0538 | -22.1 | 2.0E-108 | 8.1E-107 |
| ENSG00000196954 | CASP4    | caspase 4 [Source:HGNC Symbol;Acc:HGNC:1505]                                                        | 2745  | -0.98 | 0.0443 | -22.1 | 7.4E-108 | 3.0E-106 |
| ENSG00000185630 | PBX1     | PBX homeobox 1 [Source:HGNC Symbol;Acc:HGNC:8632]                                                   | 736   | -1.82 | 0.0825 | -22.1 | 8.3E-108 | 3.4E-106 |
| ENSG00000126001 | CEP250   | centrosomal protein 250 [Source:HGNC Symbol;Acc:HGNC:1859]                                          | 3280  | -0.88 | 0.0401 | -22.0 | 1.5E-107 | 6.2E-106 |
| ENSG00000047644 | WWC3     | WWC family member 3 [Source:HGNC Symbol;Acc:HGNC:29237]                                             | 1318  | -1.24 | 0.0563 | -22.0 | 5.0E-107 | 2.0E-105 |
| ENSG00000186212 | SOWAHB   | sofondwah ankyrin repeat domain family member B [Source:HGNC Symbol;Acc:HGNC:32958]                 | 393   | -2.45 | 0.1115 | -21.9 | 1.2E-106 | 4.7E-105 |
| ENSG00000005469 | CROT     | carnitine O-octanoyltransferase [Source:HGNC Symbol;Acc:HGNC:2366]                                  | 588   | -1.87 | 0.0854 | -21.9 | 1.7E-106 | 6.9E-105 |
| ENSG00000135862 | LAMC1    | laminin subunit gamma 1 [Source:HGNC Symbol;Acc:HGNC:6492]                                          | 11824 | -0.62 | 0.0281 | -21.9 | 1.9E-106 | 7.6E-105 |
| ENSG00000134363 | FST      | follicle-stimulating hormone receptor 1 [Source:HGNC Symbol;Acc:HGNC:3971]                          | 269   | -3.62 | 0.1657 | -21.8 | 1.3E-105 | 5.3E-104 |
| ENSG00000152495 | CAMK4    | calcium/calmodulin dependent protein kinase IV [Source:HGNC Symbol;Acc:HGNC:1464]                   | 273   | -3.97 | 0.1831 | -21.7 | 3.1E-104 | 1.2E-102 |
| ENSG00000150893 | FREM2    | FRAS1 related extracellular matrix 2 [Source:HGNC Symbol;Acc:HGNC:25396]                            | 523   | -7.32 | 0.3385 | -21.6 | 1.4E-103 | 5.6E-102 |
| ENSG00000167114 | SLC27A4  | solute carrier family 27 member 4 [Source:HGNC Symbol;Acc:HGNC:10998]                               | 2341  | -0.95 | 0.0439 | -21.6 | 3.4E-103 | 1.3E-101 |



|                 |          |                                                                                                 |       |       |        |       |          |          |
|-----------------|----------|-------------------------------------------------------------------------------------------------|-------|-------|--------|-------|----------|----------|
| ENSG00000198399 | ITSN2    | intersectin 2 [Source:HGNC Symbol;Acc:HGNC:6184]                                                | 1646  | -1.20 | 0.0556 | -21.5 | 1.1E-102 | 4.4E-101 |
| ENSG00000101846 | STS      | steroid sulfatase [Source:HGNC Symbol;Acc:HGNC:11425]                                           | 336   | -2.62 | 0.1220 | -21.5 | 1.6E-102 | 6.0E-101 |
| ENSG00000104881 | PPP1R13L | protein phosphatase 1 regulatory subunit 13 like [Source:HGNC Symbol;Acc:HGNC:18838]            | 4148  | -0.76 | 0.0352 | -21.5 | 2.1E-102 | 8.2E-101 |
| ENSG00000184500 | PROS1    | protein S [Source:HGNC Symbol;Acc:HGNC:9456]                                                    | 290   | -3.11 | 0.1453 | -21.4 | 6.0E-102 | 2.3E-100 |
| ENSG00000112576 | CCND3    | cyclin D3 [Source:HGNC Symbol;Acc:HGNC:1585]                                                    | 5928  | -0.68 | 0.0317 | -21.4 | 9.9E-102 | 3.8E-100 |
| ENSG00000150556 | LYPD6B   | LY6/PLAUR domain containing 6B [Source:HGNC Symbol;Acc:HGNC:27018]                              | 552   | -1.91 | 0.0892 | -21.4 | 1.1E-101 | 4.3E-100 |
| ENSG00000108094 | CUL2     | cullin 2 [Source:HGNC Symbol;Acc:HGNC:2552]                                                     | 2169  | -0.98 | 0.0461 | -21.2 | 4.3E-100 | 1.6E-98  |
| ENSG00000157404 | KIT      | KIT proto-oncogene, receptor tyrosine kinase [Source:HGNC Symbol;Acc:HGNC:6342]                 | 370   | -2.43 | 0.1149 | -21.1 | 5.5E-99  | 2.1E-97  |
| ENSG00000110092 | CCND1    | cyclin D1 [Source:HGNC Symbol;Acc:HGNC:1582]                                                    | 6190  | -0.69 | 0.0326 | -21.0 | 2.5E-98  | 9.4E-97  |
| ENSG00000008513 | ST3GAL1  | ST3 beta-galactoside alpha-2,3-sialyltransferase 1 [Source:HGNC Symbol;Acc:HGNC:10862]          | 6780  | -0.64 | 0.0306 | -21.0 | 3.1E-98  | 1.2E-96  |
| ENSG00000196937 | FAM3C    | FAM3 metabolism regulating signaling molecule C [Source:HGNC Symbol;Acc:HGNC:18664]             | 3135  | -0.88 | 0.0419 | -21.0 | 3.5E-98  | 1.3E-96  |
| ENSG00000011347 | SYT7     | synaptotagmin 7 [Source:HGNC Symbol;Acc:HGNC:11514]                                             | 510   | -1.94 | 0.0926 | -21.0 | 7.4E-98  | 2.8E-96  |
| ENSG00000237289 | CKMT1B   | creatine kinase, mitochondrial 1B [Source:HGNC Symbol;Acc:HGNC:1995]                            | 266   | -3.56 | 0.1698 | -21.0 | 1.1E-97  | 4.1E-96  |
| ENSG00000164742 | ADCY1    | adenylate cyclase 1 [Source:HGNC Symbol;Acc:HGNC:232]                                           | 870   | -1.52 | 0.0725 | -20.9 | 3.8E-97  | 1.4E-95  |
| ENSG00000189180 | ZNF33A   | zinc finger protein 33A [Source:HGNC Symbol;Acc:HGNC:13096]                                     | 795   | -1.52 | 0.0725 | -20.9 | 4.8E-97  | 1.8E-95  |
| ENSG00000114541 | FRMD4B   | FERM domain containing 4B [Source:HGNC Symbol;Acc:HGNC:24886]                                   | 461   | -2.08 | 0.0995 | -20.9 | 6.0E-97  | 2.2E-95  |
| ENSG00000011201 | ANOS1    | anosmin 1 [Source:HGNC Symbol;Acc:HGNC:6211]                                                    | 591   | -1.73 | 0.0830 | -20.9 | 6.8E-97  | 2.5E-95  |
| ENSG00000109255 | NMU      | neuromedin U [Source:HGNC Symbol;Acc:HGNC:7859]                                                 | 266   | -3.73 | 0.1789 | -20.9 | 1.2E-96  | 4.4E-95  |
| ENSG00000165322 | ARHGAP12 | Rho GTPase activating protein 12 [Source:HGNC Symbol;Acc:HGNC:16348]                            | 1104  | -1.25 | 0.0599 | -20.8 | 1.8E-96  | 6.4E-95  |
| ENSG00000112972 | HMGCS1   | 3-hydroxy-3-methylglutaryl-CoA synthase 1 [Source:HGNC Symbol;Acc:HGNC:5007]                    | 3770  | -0.80 | 0.0386 | -20.8 | 3.1E-96  | 1.1E-94  |
| ENSG00000104549 | SQLE     | squalene epoxidase [Source:HGNC Symbol;Acc:HGNC:11279]                                          | 3764  | -0.74 | 0.0358 | -20.8 | 4.4E-96  | 1.6E-94  |
| ENSG00000125848 | FLRT3    | fibronectin leucine rich transmembrane protein 3 [Source:HGNC Symbol;Acc:HGNC:3762]             | 238   | -3.53 | 0.1706 | -20.7 | 2.8E-95  | 1.0E-93  |
| ENSG00000130939 | UBE4B    | ubiquitination factor E4B [Source:HGNC Symbol;Acc:HGNC:12500]                                   | 2634  | -0.95 | 0.0461 | -20.7 | 5.5E-95  | 2.0E-93  |
| ENSG00000073756 | PTGS2    | prostaglandin-endoperoxide synthase 2 [Source:HGNC Symbol;Acc:HGNC:9605]                        | 248   | -5.05 | 0.2451 | -20.6 | 1.7E-94  | 6.0E-93  |
| ENSG00000254635 | WAC-AS1  | WAC antisense RNA 1 (head to head) [Source:HGNC Symbol;Acc:HGNC:27347]                          | 1163  | -1.33 | 0.0644 | -20.6 | 2.0E-94  | 7.1E-93  |
| ENSG00000223573 | TINCR    | TINCR ubiquitin domain containing [Source:HGNC Symbol;Acc:HGNC:14607]                           | 3325  | -0.87 | 0.0425 | -20.6 | 2.9E-94  | 1.0E-92  |
| ENSG00000165323 | FAT3     | FAT atypical cadherin 3 [Source:HGNC Symbol;Acc:HGNC:23112]                                     | 677   | -1.92 | 0.0932 | -20.6 | 5.8E-94  | 2.1E-92  |
| ENSG00000118777 | ABCG2    | ATP binding cassette subfamily G member 2 (Junior blood group) [Source:HGNC Symbol;Acc:HGNC:74] | 1692  | -1.01 | 0.0494 | -20.5 | 1.8E-93  | 6.4E-92  |
| ENSG00000148660 | CAMK2G   | calcium/calmodulin dependent protein kinase II gamma [Source:HGNC Symbol;Acc:HGNC:1463]         | 3477  | -0.81 | 0.0398 | -20.5 | 4.2E-93  | 1.5E-91  |
| ENSG00000108100 | CCNY     | cyclin Y [Source:HGNC Symbol;Acc:HGNC:23354]                                                    | 3334  | -0.79 | 0.0388 | -20.4 | 8.7E-93  | 3.0E-91  |
| ENSG00000111110 | PPM1H    | protein phosphatase, Mg2+/Mn2+ dependent 1H [Source:HGNC Symbol;Acc:HGNC:18583]                 | 1718  | -1.03 | 0.0506 | -20.4 | 9.0E-93  | 3.1E-91  |
| ENSG00000088325 | TPX2     | TPX2 microtubule nucleation factor [Source:HGNC Symbol;Acc:HGNC:1249]                           | 12322 | -0.52 | 0.0257 | -20.4 | 2.2E-92  | 7.8E-91  |
| ENSG00000182481 | KPNA2    | karyopherin subunit alpha 2 [Source:HGNC Symbol;Acc:HGNC:6395]                                  | 9808  | -0.67 | 0.0329 | -20.3 | 6.9E-92  | 2.4E-90  |
| ENSG00000136943 | CTSV     | cathepsin V [Source:HGNC Symbol;Acc:HGNC:2538]                                                  | 9951  | -0.60 | 0.0293 | -20.3 | 9.0E-92  | 3.1E-90  |
| ENSG00000173267 | SNCG     | synuclein gamma [Source:HGNC Symbol;Acc:HGNC:11141]                                             | 1447  | -1.08 | 0.0534 | -20.3 | 1.0E-91  | 3.4E-90  |
| ENSG00000143412 | ANXA9    | annexin A9 [Source:HGNC Symbol;Acc:HGNC:547]                                                    | 832   | -1.42 | 0.0700 | -20.3 | 1.7E-91  | 5.6E-90  |
| ENSG00000167306 | MYO5B    | myosin VB [Source:HGNC Symbol;Acc:HGNC:7603]                                                    | 1756  | -1.05 | 0.0518 | -20.3 | 2.7E-91  | 9.1E-90  |
| ENSG00000140284 | SLC27A2  | solute carrier family 27 member 2 [Source:HGNC Symbol;Acc:HGNC:10996]                           | 229   | -3.79 | 0.1872 | -20.3 | 3.3E-91  | 1.1E-89  |
| ENSG00000078081 | LAMP3    | lysosomal associated membrane protein 3 [Source:HGNC Symbol;Acc:HGNC:14582]                     | 966   | -1.32 | 0.0650 | -20.3 | 3.5E-91  | 1.2E-89  |
| ENSG00000149639 | SOGA1    | suppressor of glucose, autophagy associated 1 [Source:HGNC Symbol;Acc:HGNC:16111]               | 2739  | -0.92 | 0.0457 | -20.2 | 4.4E-91  | 1.5E-89  |
| ENSG00000127084 | FGD3     | FYVE, RhoGEF and PH domain containing 3 [Source:HGNC Symbol;Acc:HGNC:16027]                     | 473   | -1.92 | 0.0950 | -20.2 | 5.6E-91  | 1.9E-89  |
| ENSG00000101311 | FERMT1   | fermitin family member 1 [Source:HGNC Symbol;Acc:HGNC:15889]                                    | 974   | -1.36 | 0.0672 | -20.2 | 8.9E-91  | 3.0E-89  |

|                 |          |                                                                                          |      |       |        |       |         |         |
|-----------------|----------|------------------------------------------------------------------------------------------|------|-------|--------|-------|---------|---------|
| ENSG00000185262 | UBALD2   | UBA like domain containing 2 [Source:HGNC Symbol;Acc:HGNC:28438]                         | 1060 | -1.24 | 0.0612 | -20.2 | 1.1E-90 | 3.6E-89 |
| ENSG00000134046 | MBD2     | methyl-CpG binding domain protein 2 [Source:HGNC Symbol;Acc:HGNC:6917]                   | 2462 | -0.86 | 0.0427 | -20.2 | 1.2E-90 | 4.1E-89 |
| ENSG00000134779 | TPGS2    | tubulin polyglutamylase complex subunit 2 [Source:HGNC Symbol;Acc:HGNC:24561]            | 3002 | -0.79 | 0.0390 | -20.2 | 1.4E-90 | 4.8E-89 |
| ENSG00000176485 | PLAAT3   | phospholipase A and acyltransferase 3 [Source:HGNC Symbol;Acc:HGNC:17825]                | 960  | -1.32 | 0.0654 | -20.2 | 2.1E-90 | 7.1E-89 |
| ENSG00000137857 | DUOX1    | dual oxidase 1 [Source:HGNC Symbol;Acc:HGNC:3062]                                        | 225  | -3.69 | 0.1833 | -20.1 | 3.7E-90 | 1.2E-88 |
| ENSG00000100842 | EFS      | embryonal Fyn-associated substrate [Source:HGNC Symbol;Acc:HGNC:16898]                   | 247  | -3.27 | 0.1626 | -20.1 | 5.0E-90 | 1.7E-88 |
| ENSG00000081052 | COL4A4   | collagen type IV alpha 4 chain [Source:HGNC Symbol;Acc:HGNC:2206]                        | 236  | -3.27 | 0.1631 | -20.0 | 2.6E-89 | 8.7E-88 |
| ENSG00000197622 | CDC42SE1 | CDC42 small effector 1 [Source:HGNC Symbol;Acc:HGNC:17719]                               | 2516 | -0.84 | 0.0418 | -20.0 | 3.1E-89 | 1.0E-87 |
| ENSG00000134760 | DSG1     | desmoglein 1 [Source:HGNC Symbol;Acc:HGNC:3048]                                          | 398  | -7.00 | 0.3496 | -20.0 | 3.3E-89 | 1.1E-87 |
| ENSG00000120149 | MSX2     | msh homeobox 2 [Source:HGNC Symbol;Acc:HGNC:7392]                                        | 912  | -1.57 | 0.0785 | -20.0 | 3.4E-89 | 1.1E-87 |
| ENSG00000138162 | TACC2    | transforming acidic coiled-coil containing protein 2 [Source:HGNC Symbol;Acc:HGNC:11523] | 1342 | -1.20 | 0.0599 | -20.0 | 3.7E-89 | 1.2E-87 |
| ENSG00000164932 | CTHRC1   | collagen triple helix repeat containing 1 [Source:HGNC Symbol;Acc:HGNC:18831]            | 253  | -3.21 | 0.1604 | -20.0 | 4.4E-89 | 1.4E-87 |
| ENSG00000181634 | TNFSF15  | TNF superfamily member 15 [Source:HGNC Symbol;Acc:HGNC:11931]                            | 377  | -2.21 | 0.1108 | -19.9 | 1.9E-88 | 6.1E-87 |
| ENSG00000157227 | MMP14    | matrix metalloproteinase 14 [Source:HGNC Symbol;Acc:HGNC:7160]                           | 1583 | -1.07 | 0.0538 | -19.9 | 2.0E-88 | 6.5E-87 |
| ENSG00000185052 | SLC24A3  | solute carrier family 24 member 3 [Source:HGNC Symbol;Acc:HGNC:10977]                    | 236  | -3.27 | 0.1642 | -19.9 | 4.9E-88 | 1.6E-86 |
| ENSG00000135931 | ARMC9    | armadillo repeat containing 9 [Source:HGNC Symbol;Acc:HGNC:20730]                        | 763  | -1.43 | 0.0722 | -19.9 | 7.4E-88 | 2.4E-86 |
| ENSG00000104177 | MYEF2    | myelin expression factor 2 [Source:HGNC Symbol;Acc:HGNC:17940]                           | 267  | -2.76 | 0.1390 | -19.8 | 1.9E-87 | 6.0E-86 |
| ENSG00000181467 | RAP2B    | RAP2B, member of RAS oncogene family [Source:HGNC Symbol;Acc:HGNC:9862]                  | 1610 | -1.00 | 0.0505 | -19.8 | 3.7E-87 | 1.2E-85 |
| ENSG00000168679 | SLC16A4  | solute carrier family 16 member 4 [Source:HGNC Symbol;Acc:HGNC:10925]                    | 786  | -1.52 | 0.0769 | -19.8 | 5.4E-87 | 1.7E-85 |
| ENSG00000245848 | CEBPA    | CCAAT enhancer binding protein alpha [Source:HGNC Symbol;Acc:HGNC:1833]                  | 231  | -4.14 | 0.2096 | -19.7 | 8.5E-87 | 2.7E-85 |
| ENSG00000145386 | CCNA2    | cyclin A2 [Source:HGNC Symbol;Acc:HGNC:1578]                                             | 2949 | -0.77 | 0.0392 | -19.7 | 9.8E-87 | 3.1E-85 |
| ENSG00000148218 | ALAD     | aminolevulinatase dehydratase [Source:HGNC Symbol;Acc:HGNC:395]                          | 957  | -1.34 | 0.0678 | -19.7 | 1.9E-86 | 5.9E-85 |
| ENSG00000166833 | NAV2     | neuron navigator 2 [Source:HGNC Symbol;Acc:HGNC:15997]                                   | 566  | -1.68 | 0.0853 | -19.7 | 2.1E-86 | 6.5E-85 |
| ENSG00000144369 | FAM171B  | family with sequence similarity 171 member B [Source:HGNC Symbol;Acc:HGNC:29412]         | 648  | -1.59 | 0.0807 | -19.6 | 6.5E-86 | 2.0E-84 |
| ENSG00000144036 | EXOC6B   | exocyst complex component 6B [Source:HGNC Symbol;Acc:HGNC:17085]                         | 1726 | -0.99 | 0.0506 | -19.6 | 9.9E-86 | 3.1E-84 |
| ENSG00000172575 | RASGRP1  | RAS guanyl releasing protein 1 [Source:HGNC Symbol;Acc:HGNC:9878]                        | 229  | -5.26 | 0.2679 | -19.6 | 1.0E-85 | 3.2E-84 |
| ENSG00000088812 | ATRN     | attractin [Source:HGNC Symbol;Acc:HGNC:885]                                              | 3215 | -0.81 | 0.0415 | -19.6 | 1.1E-85 | 3.3E-84 |
| ENSG00000166206 | GABRB3   | gamma-aminobutyric acid type A receptor subunit beta3 [Source:HGNC Symbol;Acc:HGNC:4083] | 439  | -2.08 | 0.1061 | -19.6 | 1.4E-85 | 4.5E-84 |
| ENSG00000171310 | CHST11   | carbohydrate sulfotransferase 11 [Source:HGNC Symbol;Acc:HGNC:17422]                     | 1738 | -0.98 | 0.0499 | -19.6 | 3.5E-85 | 1.1E-83 |
| ENSG00000122779 | TRIM24   | tripartite motif containing 24 [Source:HGNC Symbol;Acc:HGNC:11812]                       | 1181 | -1.19 | 0.0610 | -19.5 | 4.2E-85 | 1.3E-83 |
| ENSG00000147180 | ZNF711   | zinc finger protein 711 [Source:HGNC Symbol;Acc:HGNC:13128]                              | 249  | -2.93 | 0.1500 | -19.5 | 7.4E-85 | 2.3E-83 |
| ENSG00000179046 | TRIML2   | tripartite motif family like 2 [Source:HGNC Symbol;Acc:HGNC:26378]                       | 732  | -1.49 | 0.0766 | -19.5 | 1.5E-84 | 4.7E-83 |
| ENSG00000150051 | MXK      | mohawk homeobox [Source:HGNC Symbol;Acc:HGNC:23729]                                      | 218  | -4.17 | 0.2140 | -19.5 | 2.1E-84 | 6.4E-83 |
| ENSG00000183741 | CBX6     | chromobox 6 [Source:HGNC Symbol;Acc:HGNC:1556]                                           | 3119 | -0.94 | 0.0484 | -19.5 | 2.3E-84 | 7.0E-83 |
| ENSG00000196352 | CD55     | CD55 molecule (Cromer blood group) [Source:HGNC Symbol;Acc:HGNC:2665]                    | 3983 | -0.70 | 0.0359 | -19.4 | 4.3E-84 | 1.3E-82 |
| ENSG00000186193 | SAPCD2   | suppressor APC domain containing 2 [Source:HGNC Symbol;Acc:HGNC:28055]                   | 1221 | -1.21 | 0.0623 | -19.4 | 6.6E-84 | 2.0E-82 |
| ENSG00000170873 | MTSS1    | MTSS I-BAR domain containing 1 [Source:HGNC Symbol;Acc:HGNC:20443]                       | 739  | -1.41 | 0.0728 | -19.4 | 1.4E-83 | 4.2E-82 |
| ENSG00000164104 | HMGB2    | high mobility group box 2 [Source:HGNC Symbol;Acc:HGNC:5000]                             | 3995 | -0.72 | 0.0374 | -19.4 | 1.7E-83 | 5.0E-82 |
| ENSG00000185305 | ARL15    | ADP ribosylation factor like GTPase 15 [Source:HGNC Symbol;Acc:HGNC:25945]               | 255  | -2.92 | 0.1513 | -19.3 | 3.5E-83 | 1.0E-81 |
| ENSG00000214530 | STARD10  | StAR related lipid transfer domain containing 10 [Source:HGNC Symbol;Acc:HGNC:10666]     | 1734 | -0.94 | 0.0485 | -19.3 | 9.8E-83 | 2.9E-81 |
| ENSG00000167880 | EVPL     | envoplakin [Source:HGNC Symbol;Acc:HGNC:3503]                                            | 4959 | -0.74 | 0.0387 | -19.3 | 1.4E-82 | 4.2E-81 |
| ENSG00000154473 | BUB3     | BUB3 mitotic checkpoint protein [Source:HGNC Symbol;Acc:HGNC:1151]                       | 5247 | -0.61 | 0.0317 | -19.2 | 3.9E-82 | 1.2E-80 |

|                 |          |                                                                                                       |       |       |        |       |         |         |
|-----------------|----------|-------------------------------------------------------------------------------------------------------|-------|-------|--------|-------|---------|---------|
| ENSG00000122378 | PRXL2A   | peroxiredoxin like 2A [Source:HGNC Symbol;Acc:HGNC:28651]                                             | 927   | -1.29 | 0.0672 | -19.2 | 6.0E-82 | 1.8E-80 |
| ENSG00000144476 | ACKR3    | atypical chemokine receptor 3 [Source:HGNC Symbol;Acc:HGNC:23692]                                     | 201   | -3.86 | 0.2013 | -19.2 | 6.3E-82 | 1.9E-80 |
| ENSG00000187605 | TET3     | tet methylcytosine dioxygenase 3 [Source:HGNC Symbol;Acc:HGNC:28313]                                  | 1894  | -1.03 | 0.0537 | -19.2 | 9.3E-82 | 2.8E-80 |
| ENSG00000257923 | CUX1     | cut like homeobox 1 [Source:HGNC Symbol;Acc:HGNC:2557]                                                | 2037  | -0.89 | 0.0467 | -19.1 | 2.2E-81 | 6.4E-80 |
| ENSG00000175906 | ARL4D    | ADP ribosylation factor like GTPase 4D [Source:HGNC Symbol;Acc:HGNC:656]                              | 1047  | -1.18 | 0.0616 | -19.1 | 3.8E-81 | 1.1E-79 |
| ENSG00000076864 | RAP1GAP  | RAP1 GTPase activating protein [Source:HGNC Symbol;Acc:HGNC:9858]                                     | 1287  | -1.08 | 0.0564 | -19.1 | 3.8E-81 | 1.1E-79 |
| ENSG00000184459 | BPIFC    | BPI fold containing family C [Source:HGNC Symbol;Acc:HGNC:16503]                                      | 204   | -3.55 | 0.1861 | -19.1 | 4.3E-81 | 1.2E-79 |
| ENSG00000198840 | MT-ND3   | mitochondrially encoded NADH:ubiquinone oxidoreductase core subunit 3 [Source:HGNC Symbol;Acc:H       | 17042 | -0.58 | 0.0305 | -19.0 | 7.6E-81 | 2.2E-79 |
| ENSG00000186635 | ARAP1    | ArfGAP with RhoGAP domain, ankyrin repeat and PH domain 1 [Source:HGNC Symbol;Acc:HGNC:16925]         | 661   | -1.51 | 0.0793 | -19.0 | 8.1E-81 | 2.4E-79 |
| ENSG00000116574 | RHOA     | ras homolog family member U [Source:HGNC Symbol;Acc:HGNC:17794]                                       | 236   | -2.96 | 0.1558 | -19.0 | 1.0E-80 | 2.9E-79 |
| ENSG00000180914 | OXTN     | oxytocin receptor [Source:HGNC Symbol;Acc:HGNC:8529]                                                  | 794   | -1.33 | 0.0698 | -19.0 | 1.4E-80 | 4.2E-79 |
| ENSG00000100364 | KIAA0930 | KIAA0930 [Source:HGNC Symbol;Acc:HGNC:1314]                                                           | 1283  | -1.06 | 0.0558 | -19.0 | 1.6E-80 | 4.6E-79 |
| ENSG00000092621 | PHGDH    | phosphoglycerate dehydrogenase [Source:HGNC Symbol;Acc:HGNC:8923]                                     | 3907  | -0.72 | 0.0380 | -19.0 | 2.2E-80 | 6.4E-79 |
| ENSG00000161921 | CXCL16   | C-X-C motif chemokine ligand 16 [Source:HGNC Symbol;Acc:HGNC:16642]                                   | 1419  | -1.05 | 0.0552 | -19.0 | 2.3E-80 | 6.6E-79 |
| ENSG00000107951 | MTPAP    | mitochondrial poly(A) polymerase [Source:HGNC Symbol;Acc:HGNC:25532]                                  | 1453  | -1.05 | 0.0553 | -19.0 | 2.8E-80 | 8.0E-79 |
| ENSG00000170571 | EMB      | embigin [Source:HGNC Symbol;Acc:HGNC:30465]                                                           | 1006  | -1.40 | 0.0740 | -19.0 | 3.6E-80 | 1.0E-78 |
| ENSG00000091490 | SEL1L3   | SEL1L family member 3 [Source:HGNC Symbol;Acc:HGNC:29108]                                             | 646   | -1.49 | 0.0785 | -18.9 | 8.6E-80 | 2.5E-78 |
| ENSG00000014216 | CAPN1    | calpain 1 [Source:HGNC Symbol;Acc:HGNC:1476]                                                          | 9727  | -0.53 | 0.0280 | -18.9 | 2.7E-79 | 7.6E-78 |
| ENSG00000169469 | SPRR1B   | small proline rich protein 1B [Source:HGNC Symbol;Acc:HGNC:11260]                                     | 479   | -1.84 | 0.0978 | -18.8 | 5.1E-79 | 1.4E-77 |
| ENSG00000078018 | MAP2     | microtubule associated protein 2 [Source:HGNC Symbol;Acc:HGNC:6839]                                   | 545   | -1.67 | 0.0887 | -18.8 | 5.4E-79 | 1.5E-77 |
| ENSG00000164211 | STARD4   | StAR related lipid transfer domain containing 4 [Source:HGNC Symbol;Acc:HGNC:18058]                   | 582   | -1.66 | 0.0886 | -18.8 | 1.0E-78 | 2.8E-77 |
| ENSG00000123159 | GIPC1    | GIPC PDZ domain containing family member 1 [Source:HGNC Symbol;Acc:HGNC:1226]                         | 8648  | -0.53 | 0.0282 | -18.8 | 1.1E-78 | 3.0E-77 |
| ENSG00000186297 | GABRA5   | gamma-aminobutyric acid type A receptor subunit alpha5 [Source:HGNC Symbol;Acc:HGNC:4079]             | 190   | -3.70 | 0.1972 | -18.8 | 1.4E-78 | 3.8E-77 |
| ENSG00000142949 | PTPRF    | protein tyrosine phosphatase receptor type F [Source:HGNC Symbol;Acc:HGNC:9670]                       | 13942 | -0.58 | 0.0310 | -18.7 | 3.0E-78 | 8.3E-77 |
| ENSG00000100368 | CSF2RB   | colony stimulating factor 2 receptor subunit beta [Source:HGNC Symbol;Acc:HGNC:2436]                  | 211   | -5.31 | 0.2842 | -18.7 | 5.1E-78 | 1.4E-76 |
| ENSG00000150593 | PDCD4    | programmed cell death 4 [Source:HGNC Symbol;Acc:HGNC:8763]                                            | 1647  | -1.11 | 0.0592 | -18.7 | 6.6E-78 | 1.8E-76 |
| ENSG00000103067 | ESRP2    | epithelial splicing regulatory protein 2 [Source:HGNC Symbol;Acc:HGNC:26152]                          | 2642  | -0.79 | 0.0421 | -18.7 | 6.6E-78 | 1.8E-76 |
| ENSG00000170500 | LONRF2   | LON peptidase N-terminal domain and ring finger 2 [Source:HGNC Symbol;Acc:HGNC:24788]                 | 272   | -2.52 | 0.1348 | -18.7 | 7.0E-78 | 1.9E-76 |
| ENSG00000008256 | CYTH3    | cytohesin 3 [Source:HGNC Symbol;Acc:HGNC:9504]                                                        | 3788  | -0.69 | 0.0367 | -18.7 | 1.2E-77 | 3.4E-76 |
| ENSG00000137285 | TUBB2B   | tubulin beta 2B class IIb [Source:HGNC Symbol;Acc:HGNC:30829]                                         | 301   | -2.56 | 0.1379 | -18.5 | 9.9E-77 | 2.7E-75 |
| ENSG00000120963 | ZNF706   | zinc finger protein 706 [Source:HGNC Symbol;Acc:HGNC:24992]                                           | 3647  | -0.68 | 0.0367 | -18.5 | 1.8E-76 | 4.8E-75 |
| ENSG00000110002 | VWA5A    | von Willebrand factor A domain containing 5A [Source:HGNC Symbol;Acc:HGNC:6658]                       | 323   | -2.44 | 0.1323 | -18.5 | 3.5E-76 | 9.3E-75 |
| ENSG00000130706 | ADRM1    | adhesion regulating molecule 1 [Source:HGNC Symbol;Acc:HGNC:15759]                                    | 3662  | -0.70 | 0.0379 | -18.4 | 1.1E-75 | 3.0E-74 |
| ENSG00000160216 | AGPAT3   | 1-acylglycerol-3-phosphate O-acyltransferase 3 [Source:HGNC Symbol;Acc:HGNC:326]                      | 1014  | -1.19 | 0.0645 | -18.4 | 1.1E-75 | 3.0E-74 |
| ENSG00000128274 | A4GALT   | alpha 1,4-galactosyltransferase (P blood group) [Source:HGNC Symbol;Acc:HGNC:18149]                   | 346   | -2.06 | 0.1122 | -18.4 | 1.4E-75 | 3.7E-74 |
| ENSG00000176532 | PRR15    | proline rich 15 [Source:HGNC Symbol;Acc:HGNC:22310]                                                   | 324   | -2.24 | 0.1220 | -18.4 | 2.1E-75 | 5.7E-74 |
| ENSG00000135925 | WNT10A   | Wnt family member 10A [Source:HGNC Symbol;Acc:HGNC:13829]                                             | 184   | -4.25 | 0.2316 | -18.4 | 2.5E-75 | 6.8E-74 |
| ENSG00000125534 | PPDPF    | pancreatic progenitor cell differentiation and proliferation factor [Source:HGNC Symbol;Acc:HGNC:1614 | 8847  | -0.52 | 0.0281 | -18.4 | 2.8E-75 | 7.3E-74 |
| ENSG00000100376 | FAM118A  | family with sequence similarity 118 member A [Source:HGNC Symbol;Acc:HGNC:1313]                       | 493   | -1.76 | 0.0961 | -18.4 | 2.9E-75 | 7.7E-74 |
| ENSG00000188042 | ARL4C    | ADP ribosylation factor like GTPase 4C [Source:HGNC Symbol;Acc:HGNC:698]                              | 2395  | -0.81 | 0.0444 | -18.3 | 5.2E-75 | 1.4E-73 |
| ENSG00000159348 | CYB5R1   | cytochrome b5 reductase 1 [Source:HGNC Symbol;Acc:HGNC:13397]                                         | 983   | -1.17 | 0.0637 | -18.3 | 7.2E-75 | 1.9E-73 |
| ENSG00000160094 | ZNF362   | zinc finger protein 362 [Source:HGNC Symbol;Acc:HGNC:18079]                                           | 960   | -1.16 | 0.0635 | -18.3 | 8.5E-75 | 2.2E-73 |

|                 |          |                                                                                                                |      |       |        |       |         |         |
|-----------------|----------|----------------------------------------------------------------------------------------------------------------|------|-------|--------|-------|---------|---------|
| ENSG00000104413 | ESRP1    | epithelial splicing regulatory protein 1 [Source:HGNC Symbol;Acc:HGNC:25966]                                   | 3623 | -0.67 | 0.0365 | -18.3 | 1.5E-74 | 4.0E-73 |
| ENSG00000196821 | ILRUN    | inflammation and lipid regulator with UBA-like and NBR1-like domains [Source:HGNC Symbol;Acc:HGNC:23571]       | 3185 | -0.73 | 0.0400 | -18.2 | 2.7E-74 | 7.2E-73 |
| ENSG00000235217 | TSPY26P  | testis specific protein Y-linked 26, pseudogene [Source:HGNC Symbol;Acc:HGNC:16256]                            | 347  | -2.05 | 0.1126 | -18.2 | 3.9E-74 | 1.0E-72 |
| ENSG00000145604 | SKP2     | S-phase kinase associated protein 2 [Source:HGNC Symbol;Acc:HGNC:10901]                                        | 2118 | -0.86 | 0.0474 | -18.2 | 4.3E-74 | 1.1E-72 |
| ENSG00000166145 | SPINT1   | serine peptidase inhibitor, Kunitz type 1 [Source:HGNC Symbol;Acc:HGNC:11246]                                  | 9152 | -0.52 | 0.0284 | -18.2 | 5.3E-74 | 1.4E-72 |
| ENSG00000112294 | ALDH5A1  | aldehyde dehydrogenase 5 family member A1 [Source:HGNC Symbol;Acc:HGNC:408]                                    | 558  | -1.60 | 0.0882 | -18.2 | 6.3E-74 | 1.6E-72 |
| ENSG00000088538 | DOCK3    | dedicator of cytokinesis 3 [Source:HGNC Symbol;Acc:HGNC:2989]                                                  | 638  | -1.54 | 0.0846 | -18.2 | 7.7E-74 | 2.0E-72 |
| ENSG00000275832 | ARHGAP23 | Rho GTPase activating protein 23 [Source:HGNC Symbol;Acc:HGNC:29293]                                           | 4163 | -0.67 | 0.0370 | -18.2 | 1.1E-73 | 2.9E-72 |
| ENSG00000082438 | COBLL1   | cordon-bleu WH2 repeat protein like 1 [Source:HGNC Symbol;Acc:HGNC:23571]                                      | 1027 | -1.14 | 0.0629 | -18.1 | 2.5E-73 | 6.4E-72 |
| ENSG00000035499 | DEPDC1B  | DEP domain containing 1B [Source:HGNC Symbol;Acc:HGNC:24902]                                                   | 1085 | -1.10 | 0.0609 | -18.0 | 8.0E-73 | 2.1E-71 |
| ENSG00000103657 | HERC1    | HECT and RLD domain containing E3 ubiquitin protein ligase family member 1 [Source:HGNC Symbol;Acc:HGNC:11615] | 2120 | -0.84 | 0.0464 | -18.0 | 1.7E-72 | 4.5E-71 |
| ENSG00000204219 | TCEA3    | transcription elongation factor A3 [Source:HGNC Symbol;Acc:HGNC:11615]                                         | 194  | -3.14 | 0.1745 | -18.0 | 2.1E-72 | 5.4E-71 |
| ENSG00000148341 | SH3GLB2  | SH3 domain containing GRB2 like, endophilin B2 [Source:HGNC Symbol;Acc:HGNC:10834]                             | 2353 | -0.79 | 0.0440 | -18.0 | 3.8E-72 | 9.7E-71 |
| ENSG00000119787 | ATL2     | atlastin GTPase 2 [Source:HGNC Symbol;Acc:HGNC:24047]                                                          | 1532 | -0.92 | 0.0515 | -18.0 | 4.6E-72 | 1.2E-70 |
| ENSG00000005187 | ACSM3    | acyl-CoA synthetase medium chain family member 3 [Source:HGNC Symbol;Acc:HGNC:10522]                           | 178  | -3.51 | 0.1958 | -17.9 | 7.2E-72 | 1.8E-70 |
| ENSG00000137648 | TMPRSS4  | transmembrane serine protease 4 [Source:HGNC Symbol;Acc:HGNC:11878]                                            | 170  | -4.14 | 0.2314 | -17.9 | 9.5E-72 | 2.4E-70 |
| ENSG00000265107 | GJA5     | gap junction protein alpha 5 [Source:HGNC Symbol;Acc:HGNC:4279]                                                | 244  | -2.50 | 0.1397 | -17.9 | 1.1E-71 | 2.8E-70 |
| ENSG00000182795 | C1orf116 | chromosome 1 open reading frame 116 [Source:HGNC Symbol;Acc:HGNC:28667]                                        | 1025 | -1.19 | 0.0662 | -17.9 | 1.2E-71 | 2.9E-70 |
| ENSG00000223572 | CKMT1A   | creatine kinase, mitochondrial 1A [Source:HGNC Symbol;Acc:HGNC:31736]                                          | 181  | -3.41 | 0.1917 | -17.8 | 6.5E-71 | 1.6E-69 |
| ENSG00000115616 | SLC9A2   | solute carrier family 9 member A2 [Source:HGNC Symbol;Acc:HGNC:11072]                                          | 553  | -1.54 | 0.0866 | -17.8 | 9.1E-71 | 2.3E-69 |
| ENSG00000154274 | C4orf19  | chromosome 4 open reading frame 19 [Source:HGNC Symbol;Acc:HGNC:25618]                                         | 171  | -3.75 | 0.2112 | -17.8 | 1.1E-70 | 2.8E-69 |
| ENSG00000136156 | ITM2B    | integral membrane protein 2B [Source:HGNC Symbol;Acc:HGNC:6174]                                                | 3416 | -0.68 | 0.0381 | -17.8 | 1.3E-70 | 3.3E-69 |
| ENSG00000085831 | TTC39A   | tetratricopeptide repeat domain 39A [Source:HGNC Symbol;Acc:HGNC:18657]                                        | 392  | -1.88 | 0.1062 | -17.7 | 6.0E-70 | 1.5E-68 |
| ENSG00000060982 | BCAT1    | branched chain amino acid transaminase 1 [Source:HGNC Symbol;Acc:HGNC:976]                                     | 736  | -1.34 | 0.0758 | -17.7 | 9.4E-70 | 2.3E-68 |
| ENSG00000071073 | MGAT4A   | alpha-1,3-mannosyl-glycoprotein 4-beta-N-acetylglucosaminyltransferase A [Source:HGNC Symbol;Acc:HGNC:2680]    | 685  | -1.33 | 0.0754 | -17.6 | 1.9E-69 | 4.8E-68 |
| ENSG00000101191 | DIDO1    | death inducer-obliterator 1 [Source:HGNC Symbol;Acc:HGNC:2680]                                                 | 4883 | -0.62 | 0.0355 | -17.6 | 2.5E-69 | 6.2E-68 |
| ENSG00000080189 | SLC35C2  | solute carrier family 35 member C2 [Source:HGNC Symbol;Acc:HGNC:17117]                                         | 3711 | -0.66 | 0.0377 | -17.6 | 2.6E-69 | 6.2E-68 |
| ENSG00000123983 | ACSL3    | acyl-CoA synthetase long chain family member 3 [Source:HGNC Symbol;Acc:HGNC:3570]                              | 5144 | -0.58 | 0.0331 | -17.6 | 5.9E-69 | 1.4E-67 |
| ENSG00000138606 | SHF      | Src homology 2 domain containing F [Source:HGNC Symbol;Acc:HGNC:25116]                                         | 199  | -3.02 | 0.1722 | -17.5 | 6.2E-69 | 1.5E-67 |
| ENSG00000274602 | PI4KAP1  | phosphatidylinositol 4-kinase alpha pseudogene 1 [Source:HGNC Symbol;Acc:HGNC:33576]                           | 582  | -1.50 | 0.0857 | -17.5 | 7.3E-69 | 1.8E-67 |
| ENSG00000121552 | CSTA     | cystatin A [Source:HGNC Symbol;Acc:HGNC:2481]                                                                  | 514  | -1.95 | 0.1110 | -17.5 | 7.8E-69 | 1.9E-67 |
| ENSG00000138764 | CCNG2    | cyclin G2 [Source:HGNC Symbol;Acc:HGNC:1593]                                                                   | 794  | -1.33 | 0.0762 | -17.5 | 2.4E-68 | 5.7E-67 |
| ENSG00000173212 | MAB21L3  | mab-21 like 3 [Source:HGNC Symbol;Acc:HGNC:26787]                                                              | 176  | -5.06 | 0.2899 | -17.4 | 3.8E-68 | 9.1E-67 |
| ENSG00000101181 | MTG2     | mitochondrial ribosome associated GTPase 2 [Source:HGNC Symbol;Acc:HGNC:16239]                                 | 3857 | -0.63 | 0.0364 | -17.4 | 4.6E-68 | 1.1E-66 |
| ENSG00000131067 | GGT7     | gamma-glutamyltransferase 7 [Source:HGNC Symbol;Acc:HGNC:4259]                                                 | 1264 | -0.98 | 0.0563 | -17.4 | 8.1E-68 | 1.9E-66 |
| ENSG00000165685 | TMEM52B  | transmembrane protein 52B [Source:HGNC Symbol;Acc:HGNC:26438]                                                  | 177  | -5.11 | 0.2940 | -17.4 | 9.4E-68 | 2.2E-66 |
| ENSG00000196187 | TMEM63A  | transmembrane protein 63A [Source:HGNC Symbol;Acc:HGNC:29118]                                                  | 1155 | -1.03 | 0.0590 | -17.4 | 1.0E-67 | 2.5E-66 |
| ENSG00000138835 | RGS3     | regulator of G protein signaling 3 [Source:HGNC Symbol;Acc:HGNC:9999]                                          | 786  | -1.27 | 0.0729 | -17.4 | 1.6E-67 | 3.8E-66 |
| ENSG00000148180 | GSN      | gelsolin [Source:HGNC Symbol;Acc:HGNC:4620]                                                                    | 4811 | -0.62 | 0.0356 | -17.3 | 3.2E-67 | 7.5E-66 |
| ENSG00000164070 | HSPA4L   | heat shock protein family A (Hsp70) member 4 like [Source:HGNC Symbol;Acc:HGNC:17041]                          | 433  | -1.72 | 0.0993 | -17.3 | 5.3E-67 | 1.3E-65 |
| ENSG00000136603 | SKIL     | SKI like proto-oncogene [Source:HGNC Symbol;Acc:HGNC:10897]                                                    | 1830 | -0.89 | 0.0518 | -17.3 | 1.1E-66 | 2.6E-65 |
| ENSG00000186567 | CEACAM19 | CEA cell adhesion molecule 19 [Source:HGNC Symbol;Acc:HGNC:31951]                                              | 442  | -1.70 | 0.0986 | -17.2 | 1.2E-66 | 2.8E-65 |

|                 |                 |                                                                                               |       |       |        |       |         |         |
|-----------------|-----------------|-----------------------------------------------------------------------------------------------|-------|-------|--------|-------|---------|---------|
| ENSG00000176928 | GCNT4           | glucosaminyl (N-acetyl) transferase 4 [Source:HGNC Symbol;Acc:HGNC:17973]                     | 267   | -2.26 | 0.1312 | -17.2 | 2.1E-66 | 5.0E-65 |
| ENSG00000143401 | ANP32E          | acidic nuclear phosphoprotein 32 family member E [Source:HGNC Symbol;Acc:HGNC:16673]          | 4734  | -0.59 | 0.0345 | -17.2 | 2.2E-66 | 5.1E-65 |
| ENSG00000120899 | PTK2B           | protein tyrosine kinase 2 beta [Source:HGNC Symbol;Acc:HGNC:9612]                             | 1372  | -0.97 | 0.0567 | -17.2 | 4.0E-66 | 9.4E-65 |
| ENSG00000152284 | TCF7L1          | transcription factor 7 like 1 [Source:HGNC Symbol;Acc:HGNC:11640]                             | 1510  | -1.01 | 0.0587 | -17.2 | 5.5E-66 | 1.3E-64 |
| ENSG00000112379 | ARFGEF3         | ARFGEF family member 3 [Source:HGNC Symbol;Acc:HGNC:21213]                                    | 169   | -3.46 | 0.2020 | -17.2 | 6.0E-66 | 1.4E-64 |
| ENSG00000184261 | KCNK12          | potassium two pore domain channel subfamily K member 12 [Source:HGNC Symbol;Acc:HGNC:6274]    | 179   | -3.67 | 0.2140 | -17.1 | 7.7E-66 | 1.8E-64 |
| ENSG00000145362 | ANK2            | ankyrin 2 [Source:HGNC Symbol;Acc:HGNC:493]                                                   | 158   | -4.31 | 0.2515 | -17.1 | 8.3E-66 | 1.9E-64 |
| ENSG00000126432 | PRDX5           | peroxiredoxin 5 [Source:HGNC Symbol;Acc:HGNC:9355]                                            | 10259 | -0.52 | 0.0306 | -17.1 | 1.4E-65 | 3.2E-64 |
| ENSG00000237441 | RGL2            | ral guanine nucleotide dissociation stimulator like 2 [Source:HGNC Symbol;Acc:HGNC:9769]      | 1269  | -1.01 | 0.0590 | -17.1 | 1.5E-65 | 3.4E-64 |
| ENSG00000166135 | HIF1AN          | hypoxia inducible factor 1 subunit alpha inhibitor [Source:HGNC Symbol;Acc:HGNC:17113]        | 3015  | -0.68 | 0.0401 | -17.1 | 2.6E-65 | 6.0E-64 |
| ENSG00000136235 | GNPMB           | glycoprotein nmb [Source:HGNC Symbol;Acc:HGNC:4462]                                           | 722   | -1.30 | 0.0760 | -17.1 | 3.2E-65 | 7.5E-64 |
| ENSG00000173156 | RHOD            | ras homolog family member D [Source:HGNC Symbol;Acc:HGNC:670]                                 | 6118  | -0.55 | 0.0323 | -17.0 | 3.8E-65 | 8.7E-64 |
| ENSG00000177169 | ULK1            | unc-51 like autophagy activating kinase 1 [Source:HGNC Symbol;Acc:HGNC:12558]                 | 1507  | -0.94 | 0.0554 | -17.0 | 5.5E-65 | 1.3E-63 |
| ENSG00000155066 | PROM2           | prominin 2 [Source:HGNC Symbol;Acc:HGNC:20685]                                                | 1496  | -0.91 | 0.0535 | -17.0 | 1.1E-64 | 2.5E-63 |
| ENSG0000010292  | NCAPD2          | non-SMC condensin I complex subunit D2 [Source:HGNC Symbol;Acc:HGNC:24305]                    | 5448  | -0.54 | 0.0316 | -17.0 | 1.2E-64 | 2.7E-63 |
| ENSG00000139112 | GABARAPL1       | GABA type A receptor associated protein like 1 [Source:HGNC Symbol;Acc:HGNC:4068]             | 1445  | -0.89 | 0.0526 | -16.9 | 3.2E-64 | 7.2E-63 |
| ENSG00000186480 | INSIG1          | insulin induced gene 1 [Source:HGNC Symbol;Acc:HGNC:6083]                                     | 877   | -1.19 | 0.0704 | -16.9 | 3.6E-64 | 8.0E-63 |
| ENSG00000172893 | DHCR7           | 7-dehydrocholesterol reductase [Source:HGNC Symbol;Acc:HGNC:2860]                             | 2513  | -0.75 | 0.0444 | -16.9 | 5.9E-64 | 1.3E-62 |
| ENSG00000151883 | PARP8           | poly(ADP-ribose) polymerase family member 8 [Source:HGNC Symbol;Acc:HGNC:26124]               | 163   | -5.10 | 0.3030 | -16.8 | 1.7E-63 | 3.8E-62 |
| ENSG00000160111 | CPAMD8          | C3 and PZP like alpha-2-macroglobulin domain containing 8 [Source:HGNC Symbol;Acc:HGNC:23228] | 717   | -1.24 | 0.0736 | -16.8 | 1.8E-63 | 4.0E-62 |
| ENSG00000136167 | LCP1            | lymphocyte cytosolic protein 1 [Source:HGNC Symbol;Acc:HGNC:6528]                             | 329   | -1.94 | 0.1151 | -16.8 | 1.8E-63 | 4.1E-62 |
| ENSG00000166387 | PPFIBP2         | PPFIA binding protein 2 [Source:HGNC Symbol;Acc:HGNC:9250]                                    | 155   | -4.29 | 0.2555 | -16.8 | 2.4E-63 | 5.4E-62 |
| ENSG00000157625 | TAB3            | TGF-beta activated kinase 1 (MAP3K7) binding protein 3 [Source:HGNC Symbol;Acc:HGNC:30681]    | 1797  | -0.83 | 0.0497 | -16.7 | 6.1E-63 | 1.4E-61 |
| ENSG00000204128 | C2orf72         | chromosome 2 open reading frame 72 [Source:HGNC Symbol;Acc:HGNC:27418]                        | 389   | -1.70 | 0.1016 | -16.7 | 7.5E-63 | 1.7E-61 |
| ENSG00000149115 | TNKS1BP1        | tankyrase 1 binding protein 1 [Source:HGNC Symbol;Acc:HGNC:19081]                             | 5204  | -0.60 | 0.0362 | -16.7 | 1.1E-62 | 2.4E-61 |
| ENSG00000240849 | PEDS1           | plasmalyethanolamine desaturase 1 [Source:HGNC Symbol;Acc:HGNC:16735]                         | 1283  | -0.96 | 0.0577 | -16.7 | 2.6E-62 | 5.8E-61 |
| ENSG00000140968 | IRF8            | interferon regulatory factor 8 [Source:HGNC Symbol;Acc:HGNC:5358]                             | 150   | -3.95 | 0.2370 | -16.7 | 3.0E-62 | 6.5E-61 |
| ENSG00000136928 | GABBR2          | gamma-aminobutyric acid type B receptor subunit 2 [Source:HGNC Symbol;Acc:HGNC:4507]          | 260   | -2.21 | 0.1327 | -16.6 | 3.2E-62 | 7.0E-61 |
| ENSG00000204305 | AGER            | advanced glycosylation end-product specific receptor [Source:HGNC Symbol;Acc:HGNC:320]        | 325   | -1.94 | 0.1165 | -16.6 | 3.9E-62 | 8.6E-61 |
| ENSG00000165300 | SLITRK5         | SLIT and NTRK like family member 5 [Source:HGNC Symbol;Acc:HGNC:20295]                        | 150   | -3.96 | 0.2382 | -16.6 | 6.3E-62 | 1.4E-60 |
| ENSG00000077097 | TOP2B           | DNA topoisomerase II beta [Source:HGNC Symbol;Acc:HGNC:11990]                                 | 3109  | -0.65 | 0.0392 | -16.6 | 1.4E-61 | 3.1E-60 |
| ENSG00000277443 | MARCKS          | myristoylated alanine rich protein kinase C substrate [Source:HGNC Symbol;Acc:HGNC:6759]      | 1796  | -0.85 | 0.0515 | -16.6 | 1.4E-61 | 3.1E-60 |
| ENSG00000183018 | SPNS2           | sphingolipid transporter 2 [Source:HGNC Symbol;Acc:HGNC:26992]                                | 1446  | -0.86 | 0.0523 | -16.5 | 3.1E-61 | 6.8E-60 |
| ENSG00000278730 | ENSG00000278730 | novel transcript                                                                              | 264   | -2.13 | 0.1289 | -16.5 | 4.2E-61 | 9.1E-60 |
| ENSG00000175183 | CSRP2           | cysteine and glycine rich protein 2 [Source:HGNC Symbol;Acc:HGNC:2470]                        | 403   | -1.74 | 0.1056 | -16.5 | 5.4E-61 | 1.2E-59 |
| ENSG00000130701 | RBBP8NL         | RBBP8 N-terminal like [Source:HGNC Symbol;Acc:HGNC:16144]                                     | 284   | -2.04 | 0.1239 | -16.4 | 8.4E-61 | 1.8E-59 |
| ENSG00000116017 | ARID3A          | AT-rich interaction domain 3A [Source:HGNC Symbol;Acc:HGNC:3031]                              | 1023  | -1.08 | 0.0660 | -16.4 | 1.2E-60 | 2.5E-59 |
| ENSG00000100106 | TRIOBP          | TRIO and F-actin binding protein [Source:HGNC Symbol;Acc:HGNC:17009]                          | 2537  | -0.68 | 0.0412 | -16.4 | 1.7E-60 | 3.7E-59 |
| ENSG00000090339 | ICAM1           | intercellular adhesion molecule 1 [Source:HGNC Symbol;Acc:HGNC:5344]                          | 298   | -1.97 | 0.1202 | -16.4 | 1.9E-60 | 4.2E-59 |
| ENSG00000175063 | UBE2C           | ubiquitin conjugating enzyme E2 C [Source:HGNC Symbol;Acc:HGNC:15937]                         | 3987  | -0.74 | 0.0451 | -16.4 | 2.0E-60 | 4.3E-59 |
| ENSG00000107679 | PLEKHA1         | pleckstrin homology domain containing A1 [Source:HGNC Symbol;Acc:HGNC:14335]                  | 1288  | -0.91 | 0.0557 | -16.4 | 2.4E-60 | 5.0E-59 |
| ENSG00000119541 | VPS4B           | vacuolar protein sorting 4 homolog B [Source:HGNC Symbol;Acc:HGNC:10895]                      | 1952  | -0.80 | 0.0492 | -16.4 | 3.3E-60 | 7.1E-59 |

|                 |          |                                                                                              |       |       |        |       |         |         |
|-----------------|----------|----------------------------------------------------------------------------------------------|-------|-------|--------|-------|---------|---------|
| ENSG00000085552 | IGSF9    | immunoglobulin superfamily member 9 [Source:HGNC Symbol;Acc:HGNC:18132]                      | 1024  | -1.09 | 0.0665 | -16.3 | 6.5E-60 | 1.4E-58 |
| ENSG00000132164 | SLC6A11  | solute carrier family 6 member 11 [Source:HGNC Symbol;Acc:HGNC:11044]                        | 668   | -1.31 | 0.0804 | -16.3 | 8.2E-60 | 1.7E-58 |
| ENSG00000137843 | PAK6     | p21 (RAC1) activated kinase 6 [Source:HGNC Symbol;Acc:HGNC:16061]                            | 415   | -1.60 | 0.0984 | -16.3 | 1.3E-59 | 2.7E-58 |
| ENSG00000196227 | FAM217B  | family with sequence similarity 217 member B [Source:HGNC Symbol;Acc:HGNC:16170]             | 1450  | -0.91 | 0.0560 | -16.2 | 2.4E-59 | 5.2E-58 |
| ENSG00000196975 | ANXA4    | annexin A4 [Source:HGNC Symbol;Acc:HGNC:542]                                                 | 3231  | -0.62 | 0.0385 | -16.2 | 3.8E-59 | 8.0E-58 |
| ENSG00000166670 | MMP10    | matrix metalloproteinase 10 [Source:HGNC Symbol;Acc:HGNC:7156]                               | 139   | -4.47 | 0.2760 | -16.2 | 6.4E-59 | 1.3E-57 |
| ENSG0000010278  | CD9      | CD9 molecule [Source:HGNC Symbol;Acc:HGNC:1709]                                              | 9003  | -0.51 | 0.0317 | -16.2 | 7.2E-59 | 1.5E-57 |
| ENSG00000166888 | STAT6    | signal transducer and activator of transcription 6 [Source:HGNC Symbol;Acc:HGNC:11368]       | 1529  | -0.84 | 0.0518 | -16.2 | 7.4E-59 | 1.6E-57 |
| ENSG00000114948 | ADAM23   | ADAM metalloproteinase domain 23 [Source:HGNC Symbol;Acc:HGNC:202]                           | 141   | -3.91 | 0.2416 | -16.2 | 8.1E-59 | 1.7E-57 |
| ENSG00000198911 | SREBF2   | sterol regulatory element binding transcription factor 2 [Source:HGNC Symbol;Acc:HGNC:11290] | 3629  | -0.58 | 0.0362 | -16.1 | 2.4E-58 | 5.0E-57 |
| ENSG00000086544 | ITPKC    | inositol-trisphosphate 3-kinase C [Source:HGNC Symbol;Acc:HGNC:14897]                        | 867   | -1.20 | 0.0748 | -16.1 | 2.7E-58 | 5.6E-57 |
| ENSG00000124155 | PIGT     | phosphatidylinositol glycan anchor biosynthesis class T [Source:HGNC Symbol;Acc:HGNC:14938]  | 6222  | -0.56 | 0.0346 | -16.1 | 3.2E-58 | 6.6E-57 |
| ENSG00000148773 | MKI67    | marker of proliferation Ki-67 [Source:HGNC Symbol;Acc:HGNC:7107]                             | 10843 | -0.61 | 0.0380 | -16.1 | 3.8E-58 | 7.9E-57 |
| ENSG00000078114 | NEBL     | nebulette [Source:HGNC Symbol;Acc:HGNC:16932]                                                | 581   | -1.40 | 0.0868 | -16.1 | 4.1E-58 | 8.5E-57 |
| ENSG00000169126 | ODAD2    | outer dynein arm docking complex subunit 2 [Source:HGNC Symbol;Acc:HGNC:25583]               | 179   | -2.74 | 0.1705 | -16.1 | 5.5E-58 | 1.1E-56 |
| ENSG00000104332 | SFRP1    | secreted frizzled related protein 1 [Source:HGNC Symbol;Acc:HGNC:10776]                      | 155   | -3.11 | 0.1938 | -16.0 | 5.7E-58 | 1.2E-56 |
| ENSG00000198833 | UBE2J1   | ubiquitin conjugating enzyme E2 J1 [Source:HGNC Symbol;Acc:HGNC:17598]                       | 2309  | -0.72 | 0.0448 | -16.0 | 7.6E-58 | 1.6E-56 |
| ENSG00000124143 | ARHGAP40 | Rho GTPase activating protein 40 [Source:HGNC Symbol;Acc:HGNC:16226]                         | 877   | -1.09 | 0.0679 | -16.0 | 1.7E-57 | 3.6E-56 |
| ENSG00000197324 | LRP10    | LDL receptor related protein 10 [Source:HGNC Symbol;Acc:HGNC:14553]                          | 2652  | -0.80 | 0.0502 | -16.0 | 1.7E-57 | 3.6E-56 |
| ENSG00000136720 | HS6ST1   | heparan sulfate 6-O-sulfotransferase 1 [Source:HGNC Symbol;Acc:HGNC:5201]                    | 1074  | -1.04 | 0.0656 | -15.9 | 5.3E-57 | 1.1E-55 |
| ENSG00000101871 | MID1     | midline 1 [Source:HGNC Symbol;Acc:HGNC:7095]                                                 | 2165  | -0.75 | 0.0471 | -15.9 | 6.6E-57 | 1.3E-55 |
| ENSG00000167741 | GBT6     | gamma-glutamyltransferase 6 [Source:HGNC Symbol;Acc:HGNC:26891]                              | 202   | -6.37 | 0.4010 | -15.9 | 6.7E-57 | 1.4E-55 |
| ENSG00000075407 | ZNF37A   | zinc finger protein 37A [Source:HGNC Symbol;Acc:HGNC:13102]                                  | 461   | -1.49 | 0.0940 | -15.9 | 6.9E-57 | 1.4E-55 |
| ENSG00000167861 | HID1     | HID1 domain containing [Source:HGNC Symbol;Acc:HGNC:15736]                                   | 163   | -3.01 | 0.1894 | -15.9 | 9.2E-57 | 1.9E-55 |
| ENSG00000134824 | FADS2    | fatty acid desaturase 2 [Source:HGNC Symbol;Acc:HGNC:3575]                                   | 1558  | -0.85 | 0.0533 | -15.9 | 1.3E-56 | 2.7E-55 |
| ENSG00000169116 | PARM1    | prostate androgen-regulated mucin-like protein 1 [Source:HGNC Symbol;Acc:HGNC:24536]         | 132   | -4.27 | 0.2698 | -15.8 | 1.6E-56 | 3.2E-55 |
| ENSG00000101460 | MAP1LC3A | microtubule associated protein 1 light chain 3 alpha [Source:HGNC Symbol;Acc:HGNC:6838]      | 1565  | -0.96 | 0.0608 | -15.8 | 2.7E-56 | 5.4E-55 |
| ENSG00000073350 | LLGL2    | LLGL scribble cell polarity complex component 2 [Source:HGNC Symbol;Acc:HGNC:6629]           | 2696  | -0.67 | 0.0427 | -15.8 | 2.9E-56 | 5.7E-55 |
| ENSG00000177106 | EPS8L2   | EPS8 like 2 [Source:HGNC Symbol;Acc:HGNC:21296]                                              | 3987  | -0.60 | 0.0380 | -15.8 | 3.2E-56 | 6.4E-55 |
| ENSG00000108821 | COL1A1   | collagen type I alpha 1 chain [Source:HGNC Symbol;Acc:HGNC:2197]                             | 331   | -1.92 | 0.1215 | -15.8 | 3.7E-56 | 7.3E-55 |
| ENSG00000211445 | GPX3     | glutathione peroxidase 3 [Source:HGNC Symbol;Acc:HGNC:4555]                                  | 229   | -2.20 | 0.1394 | -15.8 | 3.9E-56 | 7.7E-55 |
| ENSG00000162444 | RBP7     | retinol binding protein 7 [Source:HGNC Symbol;Acc:HGNC:30316]                                | 531   | -1.40 | 0.0891 | -15.8 | 4.7E-56 | 9.4E-55 |
| ENSG00000112655 | PTK7     | protein tyrosine kinase 7 (inactive) [Source:HGNC Symbol;Acc:HGNC:9618]                      | 3405  | -0.63 | 0.0399 | -15.8 | 4.8E-56 | 9.5E-55 |
| ENSG00000168477 | TNXB     | tenascin XB [Source:HGNC Symbol;Acc:HGNC:11976]                                              | 168   | -2.79 | 0.1770 | -15.8 | 5.0E-56 | 9.8E-55 |
| ENSG00000138074 | SLC5A6   | solute carrier family 5 member 6 [Source:HGNC Symbol;Acc:HGNC:11041]                         | 2033  | -0.73 | 0.0465 | -15.8 | 5.0E-56 | 9.9E-55 |
| ENSG00000049860 | HEXB     | hexosaminidase subunit beta [Source:HGNC Symbol;Acc:HGNC:4879]                               | 3083  | -0.78 | 0.0497 | -15.6 | 3.6E-55 | 7.1E-54 |
| ENSG00000111912 | NCOA7    | nuclear receptor coactivator 7 [Source:HGNC Symbol;Acc:HGNC:21081]                           | 1148  | -0.93 | 0.0596 | -15.6 | 3.8E-55 | 7.4E-54 |
| ENSG00000135916 | ITM2C    | integral membrane protein 2C [Source:HGNC Symbol;Acc:HGNC:6175]                              | 3672  | -0.59 | 0.0375 | -15.6 | 4.2E-55 | 8.2E-54 |
| ENSG00000179178 | TMEM125  | transmembrane protein 125 [Source:HGNC Symbol;Acc:HGNC:28275]                                | 135   | -3.47 | 0.2220 | -15.6 | 4.3E-55 | 8.4E-54 |
| ENSG00000065613 | SLK      | STE20 like kinase [Source:HGNC Symbol;Acc:HGNC:11088]                                        | 3180  | -0.59 | 0.0378 | -15.6 | 4.6E-55 | 9.0E-54 |
| ENSG00000076604 | TRAF4    | TNF receptor associated factor 4 [Source:HGNC Symbol;Acc:HGNC:12034]                         | 3322  | -0.60 | 0.0385 | -15.6 | 6.2E-55 | 1.2E-53 |
| ENSG00000168671 | UGT3A2   | UDP glycosyltransferase family 3 member A2 [Source:HGNC Symbol;Acc:HGNC:27266]               | 530   | -1.31 | 0.0839 | -15.6 | 6.9E-55 | 1.4E-53 |

|                 |          |                                                                                                 |      |       |        |       |         |         |
|-----------------|----------|-------------------------------------------------------------------------------------------------|------|-------|--------|-------|---------|---------|
| ENSG00000008323 | PLEKHG6  | pleckstrin homology and RhoGEF domain containing G6 [Source:HGNC Symbol;Acc:HGNC:25562]         | 905  | -1.04 | 0.0666 | -15.6 | 8.1E-55 | 1.6E-53 |
| ENSG00000106537 | TSPAN13  | tetraspanin 13 [Source:HGNC Symbol;Acc:HGNC:21643]                                              | 4422 | -0.54 | 0.0349 | -15.6 | 1.1E-54 | 2.1E-53 |
| ENSG00000189266 | PNRC2    | proline rich nuclear receptor coactivator 2 [Source:HGNC Symbol;Acc:HGNC:23158]                 | 2263 | -0.68 | 0.0436 | -15.5 | 2.2E-54 | 4.2E-53 |
| ENSG00000182010 | RTKN2    | rhotekin 2 [Source:HGNC Symbol;Acc:HGNC:19364]                                                  | 441  | -1.52 | 0.0977 | -15.5 | 2.5E-54 | 4.9E-53 |
| ENSG00000139173 | TMEM117  | transmembrane protein 117 [Source:HGNC Symbol;Acc:HGNC:25308]                                   | 233  | -2.09 | 0.1350 | -15.5 | 2.6E-54 | 5.1E-53 |
| ENSG00000026559 | KCNQ1    | potassium voltage-gated channel modifier subfamily G member 1 [Source:HGNC Symbol;Acc:HGNC:624] | 949  | -2.10 | 0.1356 | -15.5 | 3.6E-54 | 6.9E-53 |
| ENSG00000070159 | PTPN3    | protein tyrosine phosphatase non-receptor type 3 [Source:HGNC Symbol;Acc:HGNC:9655]             | 1569 | -0.80 | 0.0514 | -15.5 | 4.8E-54 | 9.2E-53 |
| ENSG00000151726 | ACSL1    | acyl-CoA synthetase long chain family member 1 [Source:HGNC Symbol;Acc:HGNC:3569]               | 2280 | -0.67 | 0.0430 | -15.5 | 5.2E-54 | 9.9E-53 |
| ENSG00000143013 | LMO4     | LIM domain only 4 [Source:HGNC Symbol;Acc:HGNC:6644]                                            | 2244 | -0.67 | 0.0433 | -15.5 | 6.1E-54 | 1.2E-52 |
| ENSG00000116157 | GPX7     | glutathione peroxidase 7 [Source:HGNC Symbol;Acc:HGNC:4559]                                     | 533  | -1.38 | 0.0891 | -15.5 | 7.1E-54 | 1.3E-52 |
| ENSG00000163472 | TMEM79   | transmembrane protein 79 [Source:HGNC Symbol;Acc:HGNC:28196]                                    | 579  | -1.29 | 0.0836 | -15.4 | 7.8E-54 | 1.5E-52 |
| ENSG00000158769 | F11R     | F11 receptor [Source:HGNC Symbol;Acc:HGNC:14685]                                                | 2800 | -0.69 | 0.0448 | -15.4 | 9.8E-54 | 1.9E-52 |
| ENSG00000142945 | KIF2C    | kinesin family member 2C [Source:HGNC Symbol;Acc:HGNC:6393]                                     | 2767 | -0.66 | 0.0427 | -15.4 | 2.3E-53 | 4.4E-52 |
| ENSG00000109189 | USP46    | ubiquitin specific peptidase 46 [Source:HGNC Symbol;Acc:HGNC:20075]                             | 1052 | -0.95 | 0.0621 | -15.3 | 3.9E-53 | 7.3E-52 |
| ENSG00000162817 | C1orf115 | chromosome 1 open reading frame 115 [Source:HGNC Symbol;Acc:HGNC:25873]                         | 430  | -1.43 | 0.0935 | -15.3 | 4.5E-53 | 8.6E-52 |
| ENSG00000072133 | RPS6KA6  | ribosomal protein S6 kinase A6 [Source:HGNC Symbol;Acc:HGNC:10435]                              | 191  | -2.39 | 0.1557 | -15.3 | 5.0E-53 | 9.5E-52 |
| ENSG00000141738 | GRB7     | growth factor receptor bound protein 7 [Source:HGNC Symbol;Acc:HGNC:4567]                       | 527  | -1.36 | 0.0892 | -15.3 | 1.3E-52 | 2.5E-51 |
| ENSG00000027075 | PRKCH    | protein kinase C eta [Source:HGNC Symbol;Acc:HGNC:9403]                                         | 581  | -1.23 | 0.0804 | -15.3 | 1.4E-52 | 2.5E-51 |
| ENSG00000142765 | SYTL1    | synaptotagmin like 1 [Source:HGNC Symbol;Acc:HGNC:15584]                                        | 626  | -1.19 | 0.0778 | -15.3 | 1.4E-52 | 2.6E-51 |
| ENSG00000134440 | NARS1    | asparaginyl-tRNA synthetase 1 [Source:HGNC Symbol;Acc:HGNC:7643]                                | 5207 | -0.54 | 0.0352 | -15.3 | 1.5E-52 | 2.9E-51 |
| ENSG00000006576 | PTHF2    | putative homeodomain transcription factor 2 [Source:HGNC Symbol;Acc:HGNC:13411]                 | 1942 | -0.80 | 0.0525 | -15.2 | 3.7E-52 | 7.0E-51 |
| ENSG00000112561 | TFEB     | transcription factor EB [Source:HGNC Symbol;Acc:HGNC:11753]                                     | 674  | -1.17 | 0.0774 | -15.1 | 8.5E-52 | 1.6E-50 |
| ENSG00000082212 | ME2      | malic enzyme 2 [Source:HGNC Symbol;Acc:HGNC:6984]                                               | 1045 | -0.99 | 0.0651 | -15.1 | 8.8E-52 | 1.6E-50 |
| ENSG00000146072 | TNFRSF21 | TNF receptor superfamily member 21 [Source:HGNC Symbol;Acc:HGNC:13469]                          | 3765 | -0.59 | 0.0387 | -15.1 | 9.4E-52 | 1.7E-50 |
| ENSG00000107099 | DOCK8    | dedicator of cytokinesis 8 [Source:HGNC Symbol;Acc:HGNC:19191]                                  | 163  | -2.72 | 0.1802 | -15.1 | 1.1E-51 | 2.1E-50 |
| ENSG00000100439 | ABHD4    | abhydrolase domain containing 4, N-acyl phospholipase B [Source:HGNC Symbol;Acc:HGNC:20154]     | 912  | -0.99 | 0.0658 | -15.1 | 1.3E-51 | 2.4E-50 |
| ENSG00000174951 | FUT1     | fucosyltransferase 1 (H blood group) [Source:HGNC Symbol;Acc:HGNC:4012]                         | 411  | -1.51 | 0.1001 | -15.1 | 1.3E-51 | 2.5E-50 |
| ENSG00000054598 | FOXC1    | forkhead box C1 [Source:HGNC Symbol;Acc:HGNC:3800]                                              | 394  | -1.61 | 0.1068 | -15.1 | 2.3E-51 | 4.3E-50 |
| ENSG00000151376 | ME3      | malic enzyme 3 [Source:HGNC Symbol;Acc:HGNC:6985]                                               | 530  | -1.34 | 0.0887 | -15.1 | 2.4E-51 | 4.4E-50 |
| ENSG00000170542 | SERPINB9 | serpin family B member 9 [Source:HGNC Symbol;Acc:HGNC:8955]                                     | 199  | -2.27 | 0.1508 | -15.0 | 3.7E-51 | 6.8E-50 |
| ENSG00000107104 | KANK1    | KN motif and ankyrin repeat domains 1 [Source:HGNC Symbol;Acc:HGNC:19309]                       | 1661 | -0.74 | 0.0491 | -15.0 | 4.5E-51 | 8.3E-50 |
| ENSG00000165795 | NDRG2    | NDRG family member 2 [Source:HGNC Symbol;Acc:HGNC:14460]                                        | 157  | -2.69 | 0.1788 | -15.0 | 5.2E-51 | 9.5E-50 |
| ENSG00000105825 | TFPI2    | tissue factor pathway inhibitor 2 [Source:HGNC Symbol;Acc:HGNC:11761]                           | 1896 | -0.72 | 0.0480 | -15.0 | 5.7E-51 | 1.0E-49 |
| ENSG00000106078 | COBL     | cordón-bleu WH2 repeat protein [Source:HGNC Symbol;Acc:HGNC:22199]                              | 168  | -2.59 | 0.1738 | -14.9 | 2.2E-50 | 3.9E-49 |
| ENSG00000163812 | ZDHHC3   | zinc finger DHHC-type palmitoyltransferase 3 [Source:HGNC Symbol;Acc:HGNC:18470]                | 3308 | -0.56 | 0.0376 | -14.9 | 2.2E-50 | 4.0E-49 |
| ENSG00000110076 | NRXN2    | neurexin 2 [Source:HGNC Symbol;Acc:HGNC:8009]                                                   | 123  | -4.48 | 0.3005 | -14.9 | 2.5E-50 | 4.6E-49 |
| ENSG00000186529 | CYP4F3   | cytochrome P450 family 4 subfamily F member 3 [Source:HGNC Symbol;Acc:HGNC:2646]                | 472  | -1.36 | 0.0913 | -14.9 | 4.1E-50 | 7.3E-49 |
| ENSG00000156711 | MAPK13   | mitogen-activated protein kinase 13 [Source:HGNC Symbol;Acc:HGNC:6875]                          | 2266 | -0.64 | 0.0427 | -14.9 | 4.4E-50 | 7.8E-49 |
| ENSG00000176641 | RNF152   | ring finger protein 152 [Source:HGNC Symbol;Acc:HGNC:26811]                                     | 143  | -2.83 | 0.1910 | -14.8 | 1.3E-49 | 2.4E-48 |
| ENSG00000168743 | NPNT     | nephronectin [Source:HGNC Symbol;Acc:HGNC:27405]                                                | 607  | -1.16 | 0.0783 | -14.8 | 1.9E-49 | 3.4E-48 |
| ENSG00000105852 | PON3     | paraoxonase 3 [Source:HGNC Symbol;Acc:HGNC:9206]                                                | 237  | -1.99 | 0.1352 | -14.7 | 4.2E-49 | 7.4E-48 |
| ENSG00000021645 | NRXN3    | neurexin 3 [Source:HGNC Symbol;Acc:HGNC:8010]                                                   | 173  | -6.37 | 0.4337 | -14.7 | 6.6E-49 | 1.2E-47 |

|                 |                 |                                                                                              |      |       |        |       |         |         |
|-----------------|-----------------|----------------------------------------------------------------------------------------------|------|-------|--------|-------|---------|---------|
| ENSG00000170381 | SEMA3E          | semaphorin 3E [Source:HGNC Symbol;Acc:HGNC:10727]                                            | 840  | -1.07 | 0.0731 | -14.7 | 1.3E-48 | 2.2E-47 |
| ENSG00000110911 | SLC11A2         | solute carrier family 11 member 2 [Source:HGNC Symbol;Acc:HGNC:10908]                        | 1625 | -0.76 | 0.0519 | -14.6 | 2.2E-48 | 3.8E-47 |
| ENSG00000168907 | PLA2G4F         | phospholipase A2 group IVF [Source:HGNC Symbol;Acc:HGNC:27396]                               | 127  | -3.14 | 0.2151 | -14.6 | 3.1E-48 | 5.4E-47 |
| ENSG00000112782 | CLIC5           | chloride intracellular channel 5 [Source:HGNC Symbol;Acc:HGNC:13517]                         | 341  | -1.66 | 0.1137 | -14.6 | 3.7E-48 | 6.4E-47 |
| ENSG00000077942 | FBLN1           | fibulin 1 [Source:HGNC Symbol;Acc:HGNC:3600]                                                 | 3673 | -0.58 | 0.0400 | -14.6 | 5.0E-48 | 8.7E-47 |
| ENSG00000169758 | TMEM266         | transmembrane protein 266 [Source:HGNC Symbol;Acc:HGNC:26763]                                | 136  | -2.99 | 0.2051 | -14.6 | 5.3E-48 | 9.2E-47 |
| ENSG00000115758 | ODC1            | ornithine decarboxylase 1 [Source:HGNC Symbol;Acc:HGNC:8109]                                 | 2767 | -0.59 | 0.0409 | -14.5 | 6.9E-48 | 1.2E-46 |
| ENSG00000180900 | SCRIB           | scribble planar cell polarity protein [Source:HGNC Symbol;Acc:HGNC:30377]                    | 4739 | -0.58 | 0.0401 | -14.5 | 7.9E-48 | 1.4E-46 |
| ENSG00000120162 | MOB3B           | MOB kinase activator 3B [Source:HGNC Symbol;Acc:HGNC:23825]                                  | 1696 | -0.76 | 0.0525 | -14.5 | 9.2E-48 | 1.6E-46 |
| ENSG00000116141 | MARK1           | microtubule affinity regulating kinase 1 [Source:HGNC Symbol;Acc:HGNC:6896]                  | 213  | -2.22 | 0.1532 | -14.5 | 1.6E-47 | 2.8E-46 |
| ENSG00000214491 | SEC14L6         | SEC14 like lipid binding 6 [Source:HGNC Symbol;Acc:HGNC:40047]                               | 112  | -4.49 | 0.3109 | -14.4 | 3.0E-47 | 5.1E-46 |
| ENSG00000179051 | RCC2            | regulator of chromosome condensation 2 [Source:HGNC Symbol;Acc:HGNC:30297]                   | 2303 | -0.63 | 0.0436 | -14.4 | 3.3E-47 | 5.6E-46 |
| ENSG00000163141 | BNIP1           | BCL2 interacting protein like [Source:HGNC Symbol;Acc:HGNC:16976]                            | 111  | -4.00 | 0.2775 | -14.4 | 3.7E-47 | 6.3E-46 |
| ENSG00000259820 | ENSG00000259820 | novel transcript                                                                             | 624  | -1.15 | 0.0797 | -14.4 | 4.2E-47 | 7.2E-46 |
| ENSG00000152990 | ADGRA3          | adhesion G protein-coupled receptor A3 [Source:HGNC Symbol;Acc:HGNC:13839]                   | 1998 | -0.65 | 0.0454 | -14.4 | 4.4E-47 | 7.5E-46 |
| ENSG00000149218 | ENDOD1          | endonuclease domain containing 1 [Source:HGNC Symbol;Acc:HGNC:29129]                         | 4101 | -0.51 | 0.0357 | -14.4 | 4.8E-47 | 8.2E-46 |
| ENSG00000102452 | NALCN           | sodium leak channel, non-selective [Source:HGNC Symbol;Acc:HGNC:19082]                       | 202  | -2.11 | 0.1464 | -14.4 | 5.1E-47 | 8.7E-46 |
| ENSG00000180875 | GREM2           | gremlin 2, DAN family BMP antagonist [Source:HGNC Symbol;Acc:HGNC:17655]                     | 110  | -3.95 | 0.2747 | -14.4 | 5.9E-47 | 1.0E-45 |
| ENSG00000164684 | ZNF704          | zinc finger protein 704 [Source:HGNC Symbol;Acc:HGNC:32291]                                  | 1614 | -0.73 | 0.0507 | -14.4 | 9.2E-47 | 1.6E-45 |
| ENSG00000137460 | FHDC1           | FH2 domain containing 1 [Source:HGNC Symbol;Acc:HGNC:29363]                                  | 694  | -1.06 | 0.0740 | -14.3 | 1.1E-46 | 1.9E-45 |
| ENSG00000143924 | EML4            | EMAP like 4 [Source:HGNC Symbol;Acc:HGNC:1316]                                               | 1757 | -0.71 | 0.0496 | -14.3 | 1.2E-46 | 2.0E-45 |
| ENSG00000158715 | SLC45A3         | solute carrier family 45 member 3 [Source:HGNC Symbol;Acc:HGNC:8642]                         | 333  | -1.61 | 0.1121 | -14.3 | 1.6E-46 | 2.7E-45 |
| ENSG00000119431 | HDHD3           | haloacid dehalogenase like hydrolase domain containing 3 [Source:HGNC Symbol;Acc:HGNC:28171] | 804  | -1.01 | 0.0706 | -14.3 | 1.8E-46 | 3.0E-45 |
| ENSG00000161800 | RACGAP1         | Rac GTPase activating protein 1 [Source:HGNC Symbol;Acc:HGNC:9804]                           | 3428 | -0.55 | 0.0385 | -14.3 | 2.1E-46 | 3.5E-45 |
| ENSG00000189051 | RNF222          | ring finger protein 222 [Source:HGNC Symbol;Acc:HGNC:34517]                                  | 424  | -1.37 | 0.0958 | -14.3 | 2.2E-46 | 3.7E-45 |
| ENSG00000153294 | ADGRF4          | adhesion G protein-coupled receptor F4 [Source:HGNC Symbol;Acc:HGNC:19011]                   | 2360 | -0.63 | 0.0440 | -14.3 | 2.6E-46 | 4.4E-45 |
| ENSG00000116991 | SIPA1L2         | signal induced proliferation associated 1 like 2 [Source:HGNC Symbol;Acc:HGNC:23800]         | 886  | -1.02 | 0.0711 | -14.3 | 2.9E-46 | 4.8E-45 |
| ENSG00000077585 | GPR137B         | G protein-coupled receptor 137B [Source:HGNC Symbol;Acc:HGNC:11862]                          | 304  | -1.65 | 0.1156 | -14.3 | 4.0E-46 | 6.7E-45 |
| ENSG00000164056 | SPRY1           | sprouty RTK signaling antagonist 1 [Source:HGNC Symbol;Acc:HGNC:11269]                       | 149  | -2.78 | 0.1951 | -14.2 | 4.9E-46 | 8.2E-45 |
| ENSG00000112984 | KIF20A          | kinesin family member 20A [Source:HGNC Symbol;Acc:HGNC:9787]                                 | 2505 | -0.58 | 0.0410 | -14.2 | 7.3E-46 | 1.2E-44 |
| ENSG00000134198 | TSPAN2          | tetraspanin 2 [Source:HGNC Symbol;Acc:HGNC:20659]                                            | 180  | -2.27 | 0.1604 | -14.2 | 1.2E-45 | 2.0E-44 |
| ENSG00000171346 | KRT15           | keratin 15 [Source:HGNC Symbol;Acc:HGNC:6421]                                                | 904  | -0.95 | 0.0672 | -14.1 | 3.1E-45 | 5.1E-44 |
| ENSG00000153208 | MERTK           | MER proto-oncogene, tyrosine kinase [Source:HGNC Symbol;Acc:HGNC:7027]                       | 446  | -1.30 | 0.0924 | -14.1 | 3.4E-45 | 5.6E-44 |
| ENSG00000139044 | B4GALNT3        | beta-1,4-N-acetyl-galactosaminyltransferase 3 [Source:HGNC Symbol;Acc:HGNC:24137]            | 808  | -1.06 | 0.0756 | -14.1 | 4.7E-45 | 7.8E-44 |
| ENSG00000109193 | SULT1E1         | sulfotransferase family 1E member 1 [Source:HGNC Symbol;Acc:HGNC:11377]                      | 107  | -4.64 | 0.3298 | -14.1 | 5.3E-45 | 8.8E-44 |
| ENSG00000168887 | C2orf68         | chromosome 2 open reading frame 68 [Source:HGNC Symbol;Acc:HGNC:34353]                       | 1942 | -0.67 | 0.0478 | -14.1 | 5.6E-45 | 9.2E-44 |
| ENSG00000169607 | CKAP2L          | cytoskeleton associated protein 2 like [Source:HGNC Symbol;Acc:HGNC:26877]                   | 1019 | -0.86 | 0.0613 | -14.1 | 5.9E-45 | 9.6E-44 |
| ENSG00000113946 | CLDN16          | claudin 16 [Source:HGNC Symbol;Acc:HGNC:2037]                                                | 103  | -4.21 | 0.2993 | -14.1 | 7.4E-45 | 1.2E-43 |
| ENSG00000181652 | ATG9B           | autophagy related 9B [Source:HGNC Symbol;Acc:HGNC:21899]                                     | 247  | -1.87 | 0.1331 | -14.0 | 7.8E-45 | 1.3E-43 |
| ENSG00000019485 | PRDM11          | PR/SET domain 11 [Source:HGNC Symbol;Acc:HGNC:13996]                                         | 553  | -1.18 | 0.0837 | -14.0 | 9.8E-45 | 1.6E-43 |
| ENSG00000112182 | BACH2           | BTB domain and CNC homolog 2 [Source:HGNC Symbol;Acc:HGNC:14078]                             | 142  | -2.66 | 0.1898 | -14.0 | 1.2E-44 | 1.9E-43 |
| ENSG00000171813 | PWWP2B          | PWWP domain containing 2B [Source:HGNC Symbol;Acc:HGNC:25150]                                | 2183 | -0.68 | 0.0488 | -14.0 | 1.2E-44 | 2.0E-43 |



|                 |                 |                                                                                              |      |       |        |       |         |         |
|-----------------|-----------------|----------------------------------------------------------------------------------------------|------|-------|--------|-------|---------|---------|
| ENSG0000047597  | XK              | X-linked Kx blood group [Source:HGNC Symbol;Acc:HGNC:12811]                                  | 353  | -1.59 | 0.1135 | -14.0 | 1.5E-44 | 2.4E-43 |
| ENSG00000143850 | PLEKHA6         | pleckstrin homology domain containing A6 [Source:HGNC Symbol;Acc:HGNC:17053]                 | 448  | -1.36 | 0.0969 | -14.0 | 1.5E-44 | 2.5E-43 |
| ENSG00000135679 | MDM2            | MDM2 proto-oncogene [Source:HGNC Symbol;Acc:HGNC:6973]                                       | 1127 | -0.92 | 0.0660 | -14.0 | 1.6E-44 | 2.6E-43 |
| ENSG00000133112 | TPT1            | tumor protein, translationally-controlled 1 [Source:HGNC Symbol;Acc:HGNC:12022]              | 4035 | -0.64 | 0.0461 | -14.0 | 1.8E-44 | 2.9E-43 |
| ENSG00000140443 | IGF1R           | insulin like growth factor 1 receptor [Source:HGNC Symbol;Acc:HGNC:5465]                     | 796  | -0.98 | 0.0704 | -14.0 | 1.9E-44 | 3.1E-43 |
| ENSG00000165474 | GJB2            | gap junction protein beta 2 [Source:HGNC Symbol;Acc:HGNC:4284]                               | 103  | -4.14 | 0.2963 | -14.0 | 2.0E-44 | 3.2E-43 |
| ENSG00000138623 | SEMA7A          | semaphorin 7A (John Milton Hagen blood group) [Source:HGNC Symbol;Acc:HGNC:10741]            | 1288 | -0.81 | 0.0581 | -14.0 | 2.1E-44 | 3.4E-43 |
| ENSG00000163694 | RBM47           | RNA binding motif protein 47 [Source:HGNC Symbol;Acc:HGNC:30358]                             | 1833 | -0.68 | 0.0490 | -14.0 | 2.3E-44 | 3.7E-43 |
| ENSG00000205978 | NYNRIN          | NYN domain and retroviral integrase containing [Source:HGNC Symbol;Acc:HGNC:20165]           | 138  | -2.70 | 0.1937 | -13.9 | 3.9E-44 | 6.3E-43 |
| ENSG00000064655 | EYA2            | EYA transcriptional coactivator and phosphatase 2 [Source:HGNC Symbol;Acc:HGNC:3520]         | 105  | -4.20 | 0.3017 | -13.9 | 4.0E-44 | 6.4E-43 |
| ENSG00000274173 | ENSG00000274173 | novel transcript                                                                             | 875  | -0.94 | 0.0679 | -13.9 | 5.0E-44 | 7.9E-43 |
| ENSG00000134258 | VTCN1           | V-set domain containing T cell activation inhibitor 1 [Source:HGNC Symbol;Acc:HGNC:28873]    | 704  | -1.18 | 0.0848 | -13.9 | 5.3E-44 | 8.4E-43 |
| ENSG00000161671 | EMC10           | ER membrane protein complex subunit 10 [Source:HGNC Symbol;Acc:HGNC:27609]                   | 3564 | -0.53 | 0.0381 | -13.9 | 6.6E-44 | 1.0E-42 |
| ENSG00000119411 | BSPRY           | B-box and SPRY domain containing [Source:HGNC Symbol;Acc:HGNC:18232]                         | 423  | -1.41 | 0.1016 | -13.9 | 7.0E-44 | 1.1E-42 |
| ENSG00000106624 | AEBP1           | AE binding protein 1 [Source:HGNC Symbol;Acc:HGNC:303]                                       | 149  | -2.54 | 0.1826 | -13.9 | 7.3E-44 | 1.2E-42 |
| ENSG00000111665 | CDC43           | cell division cycle associated 3 [Source:HGNC Symbol;Acc:HGNC:14624]                         | 1237 | -0.82 | 0.0588 | -13.9 | 7.5E-44 | 1.2E-42 |
| ENSG00000143126 | CELSR2          | cadherin EGF LAG seven-pass G-type receptor 2 [Source:HGNC Symbol;Acc:HGNC:3231]             | 1176 | -0.86 | 0.0619 | -13.9 | 8.0E-44 | 1.3E-42 |
| ENSG00000158014 | SLC30A2         | solute carrier family 30 member 2 [Source:HGNC Symbol;Acc:HGNC:11013]                        | 471  | -5.76 | 0.4149 | -13.9 | 8.4E-44 | 1.3E-42 |
| ENSG00000049283 | EPN3            | epsin 3 [Source:HGNC Symbol;Acc:HGNC:18235]                                                  | 844  | -1.05 | 0.0758 | -13.9 | 9.6E-44 | 1.5E-42 |
| ENSG00000124507 | PACSN1          | protein kinase C and casein kinase substrate in neurons 1 [Source:HGNC Symbol;Acc:HGNC:8570] | 102  | -4.29 | 0.3097 | -13.8 | 1.3E-43 | 2.1E-42 |
| ENSG00000112902 | SEMA5A          | semaphorin 5A [Source:HGNC Symbol;Acc:HGNC:10736]                                            | 1908 | -0.72 | 0.0521 | -13.8 | 1.5E-43 | 2.3E-42 |
| ENSG00000198535 | C2CD4A          | C2 calcium dependent domain containing 4A [Source:HGNC Symbol;Acc:HGNC:33627]                | 128  | -2.82 | 0.2037 | -13.8 | 1.7E-43 | 2.7E-42 |
| ENSG00000101255 | TRIB3           | tribbles pseudokinase 3 [Source:HGNC Symbol;Acc:HGNC:16228]                                  | 1429 | -0.82 | 0.0594 | -13.8 | 1.9E-43 | 3.0E-42 |
| ENSG00000198624 | CCDC69          | coiled-coil domain containing 69 [Source:HGNC Symbol;Acc:HGNC:24487]                         | 359  | -1.49 | 0.1080 | -13.8 | 2.2E-43 | 3.5E-42 |
| ENSG00000172057 | ORMDL3          | ORMDL sphingolipid biosynthesis regulator 3 [Source:HGNC Symbol;Acc:HGNC:16038]              | 1507 | -0.71 | 0.0511 | -13.8 | 2.4E-43 | 3.7E-42 |
| ENSG00000137714 | FDX1            | ferredoxin 1 [Source:HGNC Symbol;Acc:HGNC:3638]                                              | 1050 | -0.86 | 0.0620 | -13.8 | 2.5E-43 | 4.0E-42 |
| ENSG00000182898 | TCHHL1          | trichohyalin like 1 [Source:HGNC Symbol;Acc:HGNC:31796]                                      | 136  | -6.03 | 0.4371 | -13.8 | 2.9E-43 | 4.5E-42 |
| ENSG00000090661 | CERS4           | ceramide synthase 4 [Source:HGNC Symbol;Acc:HGNC:23747]                                      | 346  | -1.50 | 0.1088 | -13.8 | 3.6E-43 | 5.7E-42 |
| ENSG00000099875 | MKNK2           | MAPK interacting serine/threonine kinase 2 [Source:HGNC Symbol;Acc:HGNC:7111]                | 1468 | -0.72 | 0.0525 | -13.8 | 4.8E-43 | 7.4E-42 |
| ENSG00000230937 | MIR205HG        | MIR205 host gene [Source:HGNC Symbol;Acc:HGNC:43562]                                         | 121  | -5.52 | 0.4016 | -13.8 | 4.8E-43 | 7.5E-42 |
| ENSG00000187714 | SLC18A3         | solute carrier family 18 member A3 [Source:HGNC Symbol;Acc:HGNC:10936]                       | 148  | -2.50 | 0.1818 | -13.7 | 5.1E-43 | 7.9E-42 |
| ENSG00000003147 | ICA1            | islet cell autoantigen 1 [Source:HGNC Symbol;Acc:HGNC:5343]                                  | 231  | -1.83 | 0.1334 | -13.7 | 6.4E-43 | 9.9E-42 |
| ENSG00000134291 | TMEM106C        | transmembrane protein 106C [Source:HGNC Symbol;Acc:HGNC:28775]                               | 3824 | -0.54 | 0.0391 | -13.7 | 6.9E-43 | 1.1E-41 |
| ENSG00000126003 | PLAGL2          | PLAG1 like zinc finger 2 [Source:HGNC Symbol;Acc:HGNC:9047]                                  | 1050 | -0.85 | 0.0619 | -13.7 | 8.3E-43 | 1.3E-41 |
| ENSG00000176092 | CRYBG2          | crystallin beta-gamma domain containing 2 [Source:HGNC Symbol;Acc:HGNC:17295]                | 906  | -0.94 | 0.0687 | -13.7 | 8.8E-43 | 1.4E-41 |
| ENSG00000168014 | C2CD3           | C2 domain containing 3 centriole elongation regulator [Source:HGNC Symbol;Acc:HGNC:24564]    | 1583 | -0.70 | 0.0510 | -13.7 | 1.1E-42 | 1.7E-41 |
| ENSG00000164176 | EDIL3           | EGF like repeats and discoidin domains 3 [Source:HGNC Symbol;Acc:HGNC:3173]                  | 234  | -7.60 | 0.5550 | -13.7 | 1.1E-42 | 1.7E-41 |
| ENSG00000133110 | POSTN           | periostin [Source:HGNC Symbol;Acc:HGNC:16953]                                                | 101  | -3.92 | 0.2863 | -13.7 | 1.4E-42 | 2.1E-41 |
| ENSG00000182379 | NXP4            | neurexophilin 4 [Source:HGNC Symbol;Acc:HGNC:8078]                                           | 369  | -1.48 | 0.1085 | -13.7 | 1.4E-42 | 2.1E-41 |
| ENSG00000125967 | NECAB3          | N-terminal EF-hand calcium binding protein 3 [Source:HGNC Symbol;Acc:HGNC:15851]             | 1620 | -0.69 | 0.0508 | -13.7 | 1.5E-42 | 2.3E-41 |
| ENSG00000100505 | TRIM9           | tripartite motif containing 9 [Source:HGNC Symbol;Acc:HGNC:16288]                            | 297  | -1.71 | 0.1251 | -13.7 | 1.9E-42 | 2.9E-41 |
| ENSG00000156675 | RAB11FIP1       | RAB11 family interacting protein 1 [Source:HGNC Symbol;Acc:HGNC:30265]                       | 1199 | -0.83 | 0.0605 | -13.6 | 2.1E-42 | 3.2E-41 |

|                 |            |                                                                                                  |      |       |        |       |         |         |
|-----------------|------------|--------------------------------------------------------------------------------------------------|------|-------|--------|-------|---------|---------|
| ENSG00000140479 | PCSK6      | proprotein convertase subtilisin/kexin type 6 [Source:HGNC Symbol;Acc:HGNC:8569]                 | 148  | -2.44 | 0.1789 | -13.6 | 3.0E-42 | 4.6E-41 |
| ENSG00000115919 | KYNU       | kynureninase [Source:HGNC Symbol;Acc:HGNC:6469]                                                  | 143  | -6.22 | 0.4571 | -13.6 | 3.7E-42 | 5.6E-41 |
| ENSG00000110841 | PPF1BP1    | PPF1A binding protein 1 [Source:HGNC Symbol;Acc:HGNC:9249]                                       | 1930 | -0.63 | 0.0463 | -13.6 | 3.7E-42 | 5.6E-41 |
| ENSG00000124343 | XG         | Xg glycoprotein (Xg blood group) [Source:HGNC Symbol;Acc:HGNC:12806]                             | 99   | -3.83 | 0.2819 | -13.6 | 4.5E-42 | 6.9E-41 |
| ENSG00000156970 | BUB1B      | BUB1 mitotic checkpoint serine/threonine kinase B [Source:HGNC Symbol;Acc:HGNC:1149]             | 1559 | -0.72 | 0.0528 | -13.6 | 6.3E-42 | 9.5E-41 |
| ENSG00000285820 | ENSG000002 | Novel transcript, antisense to ASTN2                                                             | 126  | -2.78 | 0.2052 | -13.6 | 6.3E-42 | 9.5E-41 |
| ENSG00000146950 | SHROOM2    | shroom family member 2 [Source:HGNC Symbol;Acc:HGNC:630]                                         | 127  | -2.81 | 0.2070 | -13.6 | 7.2E-42 | 1.1E-40 |
| ENSG00000117399 | CDC20      | cell division cycle 20 [Source:HGNC Symbol;Acc:HGNC:1723]                                        | 5073 | -0.55 | 0.0407 | -13.6 | 7.8E-42 | 1.2E-40 |
| ENSG00000169247 | SH3TC2     | SH3 domain and tetratricopeptide repeats 2 [Source:HGNC Symbol;Acc:HGNC:29427]                   | 786  | -0.95 | 0.0704 | -13.5 | 1.5E-41 | 2.3E-40 |
| ENSG00000117650 | NEK2       | NIMA related kinase 2 [Source:HGNC Symbol;Acc:HGNC:7745]                                         | 1497 | -0.71 | 0.0524 | -13.5 | 1.8E-41 | 2.7E-40 |
| ENSG00000196547 | MAN2A2     | mannosidase alpha class 2A member 2 [Source:HGNC Symbol;Acc:HGNC:6825]                           | 1060 | -0.90 | 0.0664 | -13.5 | 1.8E-41 | 2.7E-40 |
| ENSG00000205268 | PDE7A      | phosphodiesterase 7A [Source:HGNC Symbol;Acc:HGNC:8791]                                          | 472  | -1.20 | 0.0890 | -13.5 | 2.4E-41 | 3.6E-40 |
| ENSG00000120616 | EPC1       | enhancer of polycomb homolog 1 [Source:HGNC Symbol;Acc:HGNC:19876]                               | 597  | -1.06 | 0.0790 | -13.4 | 3.4E-41 | 5.1E-40 |
| ENSG00000174080 | CTSF       | cathepsin F [Source:HGNC Symbol;Acc:HGNC:2531]                                                   | 632  | -1.08 | 0.0804 | -13.4 | 3.4E-41 | 5.1E-40 |
| ENSG00000170677 | SOCS6      | suppressor of cytokine signaling 6 [Source:HGNC Symbol;Acc:HGNC:16833]                           | 1301 | -0.74 | 0.0554 | -13.4 | 3.5E-41 | 5.2E-40 |
| ENSG00000171401 | KRT13      | keratin 13 [Source:HGNC Symbol;Acc:HGNC:6415]                                                    | 97   | -3.79 | 0.2820 | -13.4 | 3.5E-41 | 5.3E-40 |
| ENSG00000184402 | SS18L1     | SS18L1 subunit of BAF chromatin remodeling complex [Source:HGNC Symbol;Acc:HGNC:15592]           | 2060 | -0.61 | 0.0455 | -13.4 | 3.6E-41 | 5.3E-40 |
| ENSG00000182013 | PNMA8A     | PNMA family member 8A [Source:HGNC Symbol;Acc:HGNC:25578]                                        | 1045 | -0.89 | 0.0660 | -13.4 | 3.6E-41 | 5.4E-40 |
| ENSG00000111540 | RAB5B      | RAB5B, member RAS oncogene family [Source:HGNC Symbol;Acc:HGNC:9784]                             | 2172 | -0.62 | 0.0463 | -13.4 | 3.8E-41 | 5.7E-40 |
| ENSG00000148498 | PAR3       | par-3 family cell polarity regulator [Source:HGNC Symbol;Acc:HGNC:16051]                         | 3133 | -0.53 | 0.0394 | -13.4 | 3.9E-41 | 5.8E-40 |
| ENSG00000146802 | TMEM168    | transmembrane protein 168 [Source:HGNC Symbol;Acc:HGNC:25826]                                    | 816  | -0.91 | 0.0680 | -13.4 | 5.9E-41 | 8.8E-40 |
| ENSG00000100784 | RPS6KA5    | ribosomal protein S6 kinase A5 [Source:HGNC Symbol;Acc:HGNC:10434]                               | 201  | -1.97 | 0.1468 | -13.4 | 7.4E-41 | 1.1E-39 |
| ENSG00000132819 | RBM38      | RNA binding motif protein 38 [Source:HGNC Symbol;Acc:HGNC:15818]                                 | 1125 | -0.82 | 0.0612 | -13.4 | 8.1E-41 | 1.2E-39 |
| ENSG00000058668 | ATP2B4     | ATPase plasma membrane Ca2+ transporting 4 [Source:HGNC Symbol;Acc:HGNC:817]                     | 2029 | -0.64 | 0.0481 | -13.4 | 8.9E-41 | 1.3E-39 |
| ENSG00000154556 | SORBS2     | sorbin and SH3 domain containing 2 [Source:HGNC Symbol;Acc:HGNC:24098]                           | 111  | -5.49 | 0.4120 | -13.3 | 1.5E-40 | 2.2E-39 |
| ENSG00000166398 | GARRE1     | granule associated Rac and RHOG effector 1 [Source:HGNC Symbol;Acc:HGNC:29016]                   | 1100 | -0.82 | 0.0617 | -13.3 | 1.5E-40 | 2.2E-39 |
| ENSG00000151414 | NEK7       | NIMA related kinase 7 [Source:HGNC Symbol;Acc:HGNC:13386]                                        | 3216 | -0.54 | 0.0409 | -13.3 | 1.8E-40 | 2.6E-39 |
| ENSG00000182985 | CADM1      | cell adhesion molecule 1 [Source:HGNC Symbol;Acc:HGNC:5951]                                      | 1042 | -0.82 | 0.0616 | -13.3 | 2.6E-40 | 3.8E-39 |
| ENSG00000074855 | ANO8       | anoctamin 8 [Source:HGNC Symbol;Acc:HGNC:29329]                                                  | 695  | -0.98 | 0.0739 | -13.3 | 4.3E-40 | 6.3E-39 |
| ENSG00000135476 | ESPL1      | extra spindle pole bodies like 1, separase [Source:HGNC Symbol;Acc:HGNC:16856]                   | 1425 | -0.68 | 0.0518 | -13.2 | 5.8E-40 | 8.5E-39 |
| ENSG00000141449 | GREB1L     | GREB1 like retinoic acid receptor coactivator [Source:HGNC Symbol;Acc:HGNC:31042]                | 836  | -0.92 | 0.0698 | -13.2 | 8.3E-40 | 1.2E-38 |
| ENSG00000109654 | TRIM2      | tripartite motif containing 2 [Source:HGNC Symbol;Acc:HGNC:15974]                                | 1647 | -0.72 | 0.0542 | -13.2 | 8.7E-40 | 1.3E-38 |
| ENSG00000182580 | EPHB3      | EPH receptor B3 [Source:HGNC Symbol;Acc:HGNC:3394]                                               | 811  | -0.92 | 0.0698 | -13.2 | 1.1E-39 | 1.6E-38 |
| ENSG00000205325 | ENSG000002 | novel transcript                                                                                 | 108  | -5.46 | 0.4146 | -13.2 | 1.2E-39 | 1.8E-38 |
| ENSG00000111911 | HINT3      | histidine triad nucleotide binding protein 3 [Source:HGNC Symbol;Acc:HGNC:18468]                 | 402  | -1.34 | 0.1014 | -13.2 | 1.3E-39 | 1.8E-38 |
| ENSG00000092445 | TYRO3      | TYRO3 protein tyrosine kinase [Source:HGNC Symbol;Acc:HGNC:12446]                                | 825  | -0.94 | 0.0713 | -13.2 | 1.4E-39 | 2.1E-38 |
| ENSG00000148730 | EIF4EBP2   | eukaryotic translation initiation factor 4E binding protein 2 [Source:HGNC Symbol;Acc:HGNC:3289] | 3243 | -0.58 | 0.0437 | -13.2 | 1.6E-39 | 2.3E-38 |
| ENSG00000156052 | GNAQ       | G protein subunit alpha q [Source:HGNC Symbol;Acc:HGNC:4390]                                     | 2873 | -0.51 | 0.0387 | -13.1 | 1.8E-39 | 2.6E-38 |
| ENSG00000120053 | GOT1       | glutamic-oxaloacetic transaminase 1 [Source:HGNC Symbol;Acc:HGNC:4432]                           | 2532 | -0.57 | 0.0433 | -13.1 | 1.8E-39 | 2.6E-38 |
| ENSG00000112293 | GPLD1      | glycosylphosphatidylinositol specific phospholipase D1 [Source:HGNC Symbol;Acc:HGNC:4459]        | 159  | -2.30 | 0.1753 | -13.1 | 1.9E-39 | 2.7E-38 |
| NA              | 22         | NA                                                                                               | 188  | -1.97 | 0.1504 | -13.1 | 2.4E-39 | 3.5E-38 |
| ENSG00000244509 | APOBEC3C   | apolipoprotein B mRNA editing enzyme catalytic subunit 3C [Source:HGNC Symbol;Acc:HGNC:17353]    | 346  | -1.35 | 0.1032 | -13.1 | 3.0E-39 | 4.2E-38 |

|                  |         |                                                                                                                  |      |       |        |       |         |         |
|------------------|---------|------------------------------------------------------------------------------------------------------------------|------|-------|--------|-------|---------|---------|
| ENSG00000137948  | BRDT    | bromodomain testis associated [Source:HGNC Symbol;Acc:HGNC:1105]                                                 | 100  | -3.31 | 0.2526 | -13.1 | 3.5E-39 | 5.0E-38 |
| ENSG00000105514  | RAB3D   | RAB3D, member RAS oncogene family [Source:HGNC Symbol;Acc:HGNC:9779]                                             | 418  | -1.27 | 0.0971 | -13.1 | 4.0E-39 | 5.8E-38 |
| ENSG00000015133  | CCDC88C | coiled-coil domain containing 88C [Source:HGNC Symbol;Acc:HGNC:19967]                                            | 138  | -2.44 | 0.1864 | -13.1 | 4.4E-39 | 6.2E-38 |
| ENSG00000124181  | PLCG1   | phospholipase C gamma 1 [Source:HGNC Symbol;Acc:HGNC:9065]                                                       | 2550 | -0.54 | 0.0411 | -13.1 | 5.5E-39 | 7.8E-38 |
| ENSG00000158352  | SHROOM4 | shroom family member 4 [Source:HGNC Symbol;Acc:HGNC:29215]                                                       | 99   | -5.13 | 0.3932 | -13.1 | 6.0E-39 | 8.5E-38 |
| ENSG00000180739  | S1PR5   | sphingosine-1-phosphate receptor 5 [Source:HGNC Symbol;Acc:HGNC:14299]                                           | 436  | -1.41 | 0.1081 | -13.0 | 8.0E-39 | 1.1E-37 |
| ENSG00000153714  | LURAP1L | leucine rich adaptor protein 1 like [Source:HGNC Symbol;Acc:HGNC:31452]                                          | 619  | -1.00 | 0.0769 | -13.0 | 8.5E-39 | 1.2E-37 |
| ENSG00000083290  | ULK2    | unc-51 like autophagy activating kinase 2 [Source:HGNC Symbol;Acc:HGNC:13480]                                    | 811  | -0.91 | 0.0702 | -13.0 | 9.7E-39 | 1.4E-37 |
| ENSG00000171462  | DLK2    | delta like non-canonical Notch ligand 2 [Source:HGNC Symbol;Acc:HGNC:21113]                                      | 285  | -1.51 | 0.1159 | -13.0 | 1.1E-38 | 1.5E-37 |
| ENSG00000029534  | ANK1    | ankyrin 1 [Source:HGNC Symbol;Acc:HGNC:492]                                                                      | 236  | -1.75 | 0.1348 | -13.0 | 1.6E-38 | 2.3E-37 |
| ENSG00000160685  | ZBTB7B  | zinc finger and BTB domain containing 7B [Source:HGNC Symbol;Acc:HGNC:18668]                                     | 1673 | -0.64 | 0.0495 | -13.0 | 2.0E-38 | 2.7E-37 |
| ENSG00000197070  | ARRDC1  | arrestin domain containing 1 [Source:HGNC Symbol;Acc:HGNC:28633]                                                 | 1466 | -0.67 | 0.0517 | -13.0 | 2.1E-38 | 2.9E-37 |
| ENSG00000184226  | PCDH9   | protocadherin 9 [Source:HGNC Symbol;Acc:HGNC:8661]                                                               | 108  | -2.94 | 0.2271 | -13.0 | 2.1E-38 | 3.0E-37 |
| ENSG00000138735  | PDE5A   | phosphodiesterase 5A [Source:HGNC Symbol;Acc:HGNC:8784]                                                          | 355  | -1.32 | 0.1022 | -13.0 | 2.2E-38 | 3.0E-37 |
| ENSG00000149591  | TAGLN   | transgelin [Source:HGNC Symbol;Acc:HGNC:11553]                                                                   | 200  | -1.87 | 0.1448 | -12.9 | 3.9E-38 | 5.4E-37 |
| ENSG000000237499 | WAKMAR2 | wound and keratinocyte migration associated lncRNA 2 [Source:HGNC Symbol;Acc:HGNC:53754]                         | 151  | -2.18 | 0.1688 | -12.9 | 4.2E-38 | 5.8E-37 |
| ENSG00000154930  | ACSS1   | acyl-CoA synthetase short chain family member 1 [Source:HGNC Symbol;Acc:HGNC:16091]                              | 701  | -0.95 | 0.0737 | -12.9 | 4.2E-38 | 5.9E-37 |
| ENSG00000119899  | SLC17A5 | solute carrier family 17 member 5 [Source:HGNC Symbol;Acc:HGNC:10933]                                            | 450  | -1.21 | 0.0937 | -12.9 | 4.9E-38 | 6.8E-37 |
| ENSG00000168300  | PCMTD1  | protein-L-isoaspartate (D-aspartate) O-methyltransferase domain containing 1 [Source:HGNC Symbol;Acc:HGNC:10933] | 507  | -1.14 | 0.0886 | -12.9 | 5.7E-38 | 7.9E-37 |
| ENSG00000145675  | PIK3R1  | phosphoinositide-3-kinase regulatory subunit 1 [Source:HGNC Symbol;Acc:HGNC:8979]                                | 626  | -1.04 | 0.0812 | -12.8 | 9.6E-38 | 1.3E-36 |
| ENSG00000187091  | PLCD1   | phospholipase C delta 1 [Source:HGNC Symbol;Acc:HGNC:9060]                                                       | 1128 | -0.80 | 0.0624 | -12.8 | 1.6E-37 | 2.2E-36 |
| ENSG00000140396  | NCOA2   | nuclear receptor coactivator 2 [Source:HGNC Symbol;Acc:HGNC:7669]                                                | 1464 | -0.67 | 0.0528 | -12.8 | 2.1E-37 | 2.9E-36 |
| ENSG00000175215  | CTDSP2  | CTD small phosphatase 2 [Source:HGNC Symbol;Acc:HGNC:17077]                                                      | 2597 | -0.54 | 0.0423 | -12.8 | 2.2E-37 | 3.0E-36 |
| ENSG00000166562  | SEC11C  | SEC11 homolog C, signal peptidase complex subunit [Source:HGNC Symbol;Acc:HGNC:23400]                            | 744  | -1.00 | 0.0783 | -12.8 | 2.7E-37 | 3.7E-36 |
| ENSG00000276600  | RAB7B   | RAB7B, member RAS oncogene family [Source:HGNC Symbol;Acc:HGNC:30513]                                            | 1372 | -0.69 | 0.0545 | -12.8 | 2.8E-37 | 3.8E-36 |
| ENSG00000136944  | LMX1B   | LIM homeobox transcription factor 1 beta [Source:HGNC Symbol;Acc:HGNC:6654]                                      | 168  | -2.08 | 0.1634 | -12.8 | 3.0E-37 | 4.1E-36 |
| ENSG00000006659  | LGALS14 | galectin 14 [Source:HGNC Symbol;Acc:HGNC:30054]                                                                  | 129  | -6.36 | 0.4993 | -12.7 | 3.5E-37 | 4.8E-36 |
| ENSG00000113532  | ST8SIA4 | ST8 alpha-N-acetylneuraminide alpha-2,8-sialyltransferase 4 [Source:HGNC Symbol;Acc:HGNC:10871]                  | 102  | -3.10 | 0.2433 | -12.7 | 4.0E-37 | 5.4E-36 |
| ENSG00000000971  | CFH     | complement factor H [Source:HGNC Symbol;Acc:HGNC:4883]                                                           | 86   | -4.37 | 0.3433 | -12.7 | 4.1E-37 | 5.6E-36 |
| ENSG00000182103  | FAM181B | family with sequence similarity 181 member B [Source:HGNC Symbol;Acc:HGNC:28512]                                 | 132  | -2.55 | 0.2003 | -12.7 | 4.8E-37 | 6.6E-36 |
| ENSG00000164830  | OXR1    | oxidation resistance 1 [Source:HGNC Symbol;Acc:HGNC:15822]                                                       | 1198 | -0.75 | 0.0591 | -12.7 | 5.5E-37 | 7.4E-36 |
| ENSG00000165029  | ABCA1   | ATP binding cassette subfamily A member 1 [Source:HGNC Symbol;Acc:HGNC:29]                                       | 629  | -1.00 | 0.0788 | -12.7 | 7.0E-37 | 9.5E-36 |
| ENSG00000116191  | RALGPS2 | Ral GEF with PH domain and SH3 binding motif 2 [Source:HGNC Symbol;Acc:HGNC:30279]                               | 1418 | -0.74 | 0.0585 | -12.7 | 8.2E-37 | 1.1E-35 |
| ENSG00000101146  | RAE1    | ribonucleic acid export 1 [Source:HGNC Symbol;Acc:HGNC:9828]                                                     | 2279 | -0.59 | 0.0462 | -12.7 | 8.3E-37 | 1.1E-35 |
| ENSG00000101198  | NKAIN4  | sodium/potassium transporting ATPase interacting 4 [Source:HGNC Symbol;Acc:HGNC:16191]                           | 89   | -4.89 | 0.3860 | -12.7 | 9.7E-37 | 1.3E-35 |
| ENSG00000134202  | GSTM3   | glutathione S-transferase mu 3 [Source:HGNC Symbol;Acc:HGNC:4635]                                                | 167  | -2.09 | 0.1652 | -12.7 | 1.1E-36 | 1.5E-35 |
| ENSG00000127954  | STEAP4  | STEAP4 metalloredutase [Source:HGNC Symbol;Acc:HGNC:21923]                                                       | 221  | -1.81 | 0.1434 | -12.6 | 2.0E-36 | 2.7E-35 |
| ENSG00000155324  | GRAMD2B | GRAM domain containing 2B [Source:HGNC Symbol;Acc:HGNC:24911]                                                    | 575  | -1.03 | 0.0817 | -12.6 | 2.1E-36 | 2.8E-35 |
| ENSG00000128710  | HOXD10  | homeobox D10 [Source:HGNC Symbol;Acc:HGNC:5133]                                                                  | 158  | -2.20 | 0.1748 | -12.6 | 2.1E-36 | 2.8E-35 |
| ENSG00000173218  | VANGL1  | VANGL planar cell polarity protein 1 [Source:HGNC Symbol;Acc:HGNC:15512]                                         | 1829 | -0.59 | 0.0471 | -12.6 | 2.5E-36 | 3.3E-35 |
| ENSG00000278540  | ACACA   | acetyl-CoA carboxylase alpha [Source:HGNC Symbol;Acc:HGNC:84]                                                    | 2222 | -0.58 | 0.0457 | -12.6 | 2.7E-36 | 3.6E-35 |
| ENSG00000121742  | GJB6    | gap junction protein beta 6 [Source:HGNC Symbol;Acc:HGNC:4288]                                                   | 138  | -6.64 | 0.5287 | -12.6 | 3.5E-36 | 4.6E-35 |

|                 |           |                                                                                                       |      |       |        |       |         |         |
|-----------------|-----------|-------------------------------------------------------------------------------------------------------|------|-------|--------|-------|---------|---------|
| ENSG00000100242 | SUN2      | Sad1 and UNC84 domain containing 2 [Source:HGNC Symbol;Acc:HGNC:14210]                                | 2291 | -0.55 | 0.0436 | -12.5 | 4.2E-36 | 5.6E-35 |
| ENSG00000173334 | TRIB1     | tribbles pseudokinase 1 [Source:HGNC Symbol;Acc:HGNC:16891]                                           | 1301 | -0.75 | 0.0597 | -12.5 | 6.5E-36 | 8.7E-35 |
| ENSG00000197312 | DDI2      | DNA damage inducible 1 homolog 2 [Source:HGNC Symbol;Acc:HGNC:24578]                                  | 1102 | -0.84 | 0.0673 | -12.5 | 6.8E-36 | 9.0E-35 |
| ENSG00000178996 | SNX18     | sorting nexin 18 [Source:HGNC Symbol;Acc:HGNC:19245]                                                  | 886  | -0.87 | 0.0694 | -12.5 | 1.0E-35 | 1.4E-34 |
| ENSG00000147144 | CCDC120   | coiled-coil domain containing 120 [Source:HGNC Symbol;Acc:HGNC:28910]                                 | 591  | -1.09 | 0.0873 | -12.5 | 1.3E-35 | 1.7E-34 |
| ENSG00000114268 | PFKFB4    | 6-phosphofructo-2-kinase/fructose-2,6-biphosphatase 4 [Source:HGNC Symbol;Acc:HGNC:8875]              | 363  | -1.29 | 0.1039 | -12.4 | 1.4E-35 | 1.9E-34 |
| ENSG00000170561 | IRX2      | iroquois homeobox 2 [Source:HGNC Symbol;Acc:HGNC:14359]                                               | 1215 | -0.75 | 0.0600 | -12.4 | 1.6E-35 | 2.1E-34 |
| ENSG00000117984 | CTSD      | cathepsin D [Source:HGNC Symbol;Acc:HGNC:2529]                                                        | 1262 | -0.75 | 0.0606 | -12.4 | 1.9E-35 | 2.5E-34 |
| ENSG00000107362 | ABHD17B   | abhydrolase domain containing 17B, depalmitoylase [Source:HGNC Symbol;Acc:HGNC:24278]                 | 445  | -1.15 | 0.0928 | -12.4 | 1.9E-35 | 2.5E-34 |
| ENSG00000109670 | FBXW7     | F-box and WD repeat domain containing 7 [Source:HGNC Symbol;Acc:HGNC:16712]                           | 1048 | -0.75 | 0.0606 | -12.4 | 2.0E-35 | 2.7E-34 |
| ENSG00000102471 | NDFIP2    | Nedd4 family interacting protein 2 [Source:HGNC Symbol;Acc:HGNC:18537]                                | 2146 | -0.61 | 0.0491 | -12.4 | 2.6E-35 | 3.4E-34 |
| ENSG00000095203 | EPB41L4B  | erythrocyte membrane protein band 4.1 like 4B [Source:HGNC Symbol;Acc:HGNC:19818]                     | 849  | -0.87 | 0.0698 | -12.4 | 2.8E-35 | 3.6E-34 |
| ENSG00000141627 | DYM       | dymeclin [Source:HGNC Symbol;Acc:HGNC:21317]                                                          | 598  | -0.98 | 0.0791 | -12.4 | 2.9E-35 | 3.8E-34 |
| ENSG00000136856 | SLC2A8    | solute carrier family 2 member 8 [Source:HGNC Symbol;Acc:HGNC:13812]                                  | 325  | -1.33 | 0.1073 | -12.4 | 3.0E-35 | 3.9E-34 |
| ENSG00000147202 | DIAPH2    | diaphanous related formin 2 [Source:HGNC Symbol;Acc:HGNC:2877]                                        | 111  | -2.64 | 0.2133 | -12.4 | 3.4E-35 | 4.4E-34 |
| ENSG00000140022 | STON2     | stonin 2 [Source:HGNC Symbol;Acc:HGNC:30652]                                                          | 1000 | -0.82 | 0.0664 | -12.4 | 3.6E-35 | 4.8E-34 |
| ENSG00000174669 | SLC29A2   | solute carrier family 29 member 2 [Source:HGNC Symbol;Acc:HGNC:11004]                                 | 285  | -1.46 | 0.1184 | -12.4 | 4.3E-35 | 5.6E-34 |
| ENSG00000134323 | MYCN      | MYCN proto-oncogene, bHLH transcription factor [Source:HGNC Symbol;Acc:HGNC:7559]                     | 101  | -5.71 | 0.4622 | -12.4 | 4.5E-35 | 5.8E-34 |
| ENSG00000105854 | PON2      | paraoxonase 2 [Source:HGNC Symbol;Acc:HGNC:9205]                                                      | 1286 | -0.69 | 0.0561 | -12.3 | 4.9E-35 | 6.4E-34 |
| ENSG00000167202 | TBC1D2B   | TBC1 domain family member 2B [Source:HGNC Symbol;Acc:HGNC:29183]                                      | 935  | -0.86 | 0.0696 | -12.3 | 5.5E-35 | 7.1E-34 |
| ENSG00000185585 | OLFML2A   | olfactomedin like 2A [Source:HGNC Symbol;Acc:HGNC:27270]                                              | 860  | -0.84 | 0.0680 | -12.3 | 5.8E-35 | 7.5E-34 |
| ENSG00000101098 | RIMS4     | regulating synaptic membrane exocytosis 4 [Source:HGNC Symbol;Acc:HGNC:16183]                         | 999  | -0.76 | 0.0616 | -12.3 | 5.8E-35 | 7.5E-34 |
| ENSG00000139182 | CLSTN3    | calsyntenin 3 [Source:HGNC Symbol;Acc:HGNC:18371]                                                     | 273  | -1.48 | 0.1200 | -12.3 | 6.5E-35 | 8.4E-34 |
| ENSG00000175318 | GRAMD2A   | GRAM domain containing 2A [Source:HGNC Symbol;Acc:HGNC:27287]                                         | 330  | -1.30 | 0.1052 | -12.3 | 6.9E-35 | 8.9E-34 |
| ENSG00000149600 | COMMD7    | COMM domain containing 7 [Source:HGNC Symbol;Acc:HGNC:16223]                                          | 700  | -1.07 | 0.0868 | -12.3 | 7.0E-35 | 9.0E-34 |
| ENSG00000126787 | DLGAP5    | DLG associated protein 5 [Source:HGNC Symbol;Acc:HGNC:16864]                                          | 1708 | -0.60 | 0.0484 | -12.3 | 9.3E-35 | 1.2E-33 |
| ENSG00000075945 | KIFAP3    | kinesin associated protein 3 [Source:HGNC Symbol;Acc:HGNC:17060]                                      | 726  | -0.88 | 0.0717 | -12.3 | 9.7E-35 | 1.3E-33 |
| ENSG00000153395 | LPCAT1    | lysophosphatidylcholine acyltransferase 1 [Source:HGNC Symbol;Acc:HGNC:25718]                         | 1881 | -0.63 | 0.0514 | -12.3 | 1.1E-34 | 1.4E-33 |
| ENSG00000134780 | DAGLA     | diacylglycerol lipase alpha [Source:HGNC Symbol;Acc:HGNC:1165]                                        | 226  | -1.69 | 0.1378 | -12.3 | 1.1E-34 | 1.5E-33 |
| ENSG00000159023 | EPB41     | erythrocyte membrane protein band 4.1 [Source:HGNC Symbol;Acc:HGNC:3377]                              | 212  | -1.71 | 0.1390 | -12.3 | 1.2E-34 | 1.6E-33 |
| ENSG00000167191 | GPRC5B    | G protein-coupled receptor class C group 5 member B [Source:HGNC Symbol;Acc:HGNC:13308]               | 388  | -1.27 | 0.1038 | -12.3 | 1.4E-34 | 1.8E-33 |
| ENSG00000234456 | MAGI2-AS3 | MAGI2 antisense RNA 3 [Source:HGNC Symbol;Acc:HGNC:40862]                                             | 81   | -4.58 | 0.3735 | -12.3 | 1.5E-34 | 1.9E-33 |
| ENSG00000106799 | TGFBR1    | transforming growth factor beta receptor 1 [Source:HGNC Symbol;Acc:HGNC:11772]                        | 908  | -0.84 | 0.0683 | -12.2 | 1.7E-34 | 2.1E-33 |
| ENSG00000261150 | EPPK1     | epiplakin 1 [Source:HGNC Symbol;Acc:HGNC:15577]                                                       | 159  | -2.01 | 0.1643 | -12.2 | 1.8E-34 | 2.3E-33 |
| ENSG00000118402 | ELOVL4    | ELOVL fatty acid elongase 4 [Source:HGNC Symbol;Acc:HGNC:14415]                                       | 394  | -1.17 | 0.0956 | -12.2 | 1.8E-34 | 2.3E-33 |
| ENSG00000159921 | GNE       | glucosamine (UDP-N-acetyl)-2-epimerase/N-acetylmannosamine kinase [Source:HGNC Symbol;Acc:HGNC:14415] | 1579 | -0.62 | 0.0506 | -12.2 | 2.5E-34 | 3.1E-33 |
| ENSG00000109046 | WSB1      | WD repeat and SOCS box containing 1 [Source:HGNC Symbol;Acc:HGNC:19221]                               | 2092 | -0.54 | 0.0442 | -12.2 | 2.6E-34 | 3.3E-33 |
| ENSG00000122778 | KIAA1549  | KIAA1549 [Source:HGNC Symbol;Acc:HGNC:22219]                                                          | 448  | -1.14 | 0.0935 | -12.2 | 2.7E-34 | 3.4E-33 |
| ENSG00000180964 | TCEAL8    | transcription elongation factor A like 8 [Source:HGNC Symbol;Acc:HGNC:28683]                          | 528  | -1.02 | 0.0835 | -12.2 | 2.8E-34 | 3.6E-33 |
| ENSG00000124171 | PAR6B     | par-6 family cell polarity regulator beta [Source:HGNC Symbol;Acc:HGNC:16245]                         | 322  | -1.35 | 0.1109 | -12.2 | 4.9E-34 | 6.1E-33 |
| ENSG00000224597 | SVIL-AS1  | SVIL antisense RNA 1 [Source:HGNC Symbol;Acc:HGNC:51219]                                              | 560  | -1.01 | 0.0834 | -12.2 | 5.4E-34 | 6.8E-33 |
| ENSG00000134690 | CDCA8     | cell division cycle associated 8 [Source:HGNC Symbol;Acc:HGNC:14629]                                  | 2012 | -0.55 | 0.0453 | -12.1 | 6.1E-34 | 7.7E-33 |

|                 |           |                                                                                                   |      |       |        |       |         |         |
|-----------------|-----------|---------------------------------------------------------------------------------------------------|------|-------|--------|-------|---------|---------|
| ENSG00000196628 | TCF4      | transcription factor 4 [Source:HGNC Symbol;Acc:HGNC:11634]                                        | 264  | -1.56 | 0.1287 | -12.1 | 7.8E-34 | 9.8E-33 |
| ENSG00000183621 | ZNF438    | zinc finger protein 438 [Source:HGNC Symbol;Acc:HGNC:21029]                                       | 122  | -2.40 | 0.1978 | -12.1 | 9.0E-34 | 1.1E-32 |
| ENSG00000139433 | GLTP      | glycolipid transfer protein [Source:HGNC Symbol;Acc:HGNC:24867]                                   | 1235 | -0.70 | 0.0581 | -12.1 | 9.7E-34 | 1.2E-32 |
| ENSG00000180891 | CUEDC1    | CUE domain containing 1 [Source:HGNC Symbol;Acc:HGNC:31350]                                       | 1352 | -0.72 | 0.0595 | -12.1 | 9.7E-34 | 1.2E-32 |
| ENSG00000151893 | CACUL1    | CDK2 associated cullin domain 1 [Source:HGNC Symbol;Acc:HGNC:23727]                               | 1472 | -0.72 | 0.0592 | -12.1 | 1.0E-33 | 1.3E-32 |
| ENSG00000075218 | GTSE1     | G2 and S-phase expressed 1 [Source:HGNC Symbol;Acc:HGNC:13698]                                    | 2109 | -0.56 | 0.0464 | -12.1 | 1.2E-33 | 1.5E-32 |
| ENSG00000165025 | SYK       | spleen associated tyrosine kinase [Source:HGNC Symbol;Acc:HGNC:11491]                             | 77   | -3.77 | 0.3127 | -12.1 | 1.7E-33 | 2.2E-32 |
| ENSG00000107672 | NSMCE4A   | NSE4 homolog A, SMC5-SMC6 complex component [Source:HGNC Symbol;Acc:HGNC:25935]                   | 543  | -0.99 | 0.0822 | -12.1 | 1.9E-33 | 2.3E-32 |
| ENSG00000179348 | GATA2     | GATA binding protein 2 [Source:HGNC Symbol;Acc:HGNC:4171]                                         | 1533 | -0.64 | 0.0534 | -12.0 | 2.2E-33 | 2.8E-32 |
| ENSG00000148842 | CNNM2     | cyclin and CBS domain divalent metal cation transport mediator 2 [Source:HGNC Symbol;Acc:HGNC:103 | 596  | -0.95 | 0.0787 | -12.0 | 2.4E-33 | 2.9E-32 |
| ENSG00000154227 | CERS3     | ceramide synthase 3 [Source:HGNC Symbol;Acc:HGNC:23752]                                           | 87   | -3.13 | 0.2603 | -12.0 | 2.9E-33 | 3.5E-32 |
| ENSG00000064763 | FAR2      | fatty acyl-CoA reductase 2 [Source:HGNC Symbol;Acc:HGNC:25531]                                    | 110  | -2.50 | 0.2084 | -12.0 | 3.1E-33 | 3.9E-32 |
| ENSG00000105880 | DLX5      | distal-less homeobox 5 [Source:HGNC Symbol;Acc:HGNC:2918]                                         | 175  | -1.95 | 0.1621 | -12.0 | 3.5E-33 | 4.4E-32 |
| ENSG00000154265 | ABCA5     | ATP binding cassette subfamily A member 5 [Source:HGNC Symbol;Acc:HGNC:35]                        | 525  | -0.99 | 0.0828 | -12.0 | 3.8E-33 | 4.7E-32 |
| ENSG00000182218 | HHIPL1    | HHIP like 1 [Source:HGNC Symbol;Acc:HGNC:19710]                                                   | 173  | -1.83 | 0.1529 | -12.0 | 3.8E-33 | 4.7E-32 |
| ENSG00000168214 | RBPJ      | recombination signal binding protein for immunoglobulin kappa J region [Source:HGNC Symbol;Acc:HG | 1236 | -0.67 | 0.0562 | -12.0 | 3.9E-33 | 4.8E-32 |
| ENSG00000239697 | TNFSF12   | TNF superfamily member 12 [Source:HGNC Symbol;Acc:HGNC:11927]                                     | 96   | -2.83 | 0.2364 | -12.0 | 4.2E-33 | 5.2E-32 |
| ENSG00000101109 | STK4      | serine/threonine kinase 4 [Source:HGNC Symbol;Acc:HGNC:11408]                                     | 2070 | -0.54 | 0.0453 | -12.0 | 4.5E-33 | 5.5E-32 |
| ENSG00000189280 | GJB5      | gap junction protein beta 5 [Source:HGNC Symbol;Acc:HGNC:4287]                                    | 203  | -1.72 | 0.1436 | -12.0 | 4.7E-33 | 5.8E-32 |
| ENSG00000267023 | LRR37A16P | leucine rich repeat containing 37 member A16, pseudogene [Source:HGNC Symbol;Acc:HGNC:43820]      | 195  | -1.69 | 0.1409 | -12.0 | 4.8E-33 | 5.9E-32 |
| ENSG00000157837 | SPPL3     | signal peptide peptidase like 3 [Source:HGNC Symbol;Acc:HGNC:30424]                               | 1138 | -0.70 | 0.0586 | -12.0 | 5.1E-33 | 6.3E-32 |
| ENSG00000102349 | KLF8      | Kruppel like factor 8 [Source:HGNC Symbol;Acc:HGNC:6351]                                          | 741  | -0.85 | 0.0712 | -12.0 | 5.8E-33 | 7.1E-32 |
| ENSG00000166483 | WEE1      | WEE1 G2 checkpoint kinase [Source:HGNC Symbol;Acc:HGNC:12761]                                     | 559  | -0.96 | 0.0805 | -12.0 | 6.1E-33 | 7.4E-32 |
| ENSG00000144857 | BOC       | BOC cell adhesion associated, oncogene regulated [Source:HGNC Symbol;Acc:HGNC:17173]              | 217  | -1.63 | 0.1362 | -12.0 | 6.1E-33 | 7.5E-32 |
| ENSG00000124249 | KCNK15    | potassium two pore domain channel subfamily K member 15 [Source:HGNC Symbol;Acc:HGNC:13814]       | 220  | -1.65 | 0.1380 | -12.0 | 6.2E-33 | 7.6E-32 |
| ENSG00000140931 | CMTM3     | CKLF like MARVEL transmembrane domain containing 3 [Source:HGNC Symbol;Acc:HGNC:19174]            | 866  | -0.80 | 0.0671 | -11.9 | 7.0E-33 | 8.6E-32 |
| ENSG00000153944 | MSI2      | musashi RNA binding protein 2 [Source:HGNC Symbol;Acc:HGNC:18585]                                 | 1194 | -0.73 | 0.0608 | -11.9 | 8.2E-33 | 1.0E-31 |
| ENSG00000159388 | BTG2      | BTG anti-proliferation factor 2 [Source:HGNC Symbol;Acc:HGNC:1131]                                | 218  | -1.58 | 0.1322 | -11.9 | 8.4E-33 | 1.0E-31 |
| ENSG00000132182 | NUP210    | nucleoporin 210 [Source:HGNC Symbol;Acc:HGNC:30052]                                               | 2766 | -0.52 | 0.0433 | -11.9 | 9.8E-33 | 1.2E-31 |
| ENSG00000113430 | IRX4      | iroquois homeobox 4 [Source:HGNC Symbol;Acc:HGNC:6129]                                            | 87   | -3.29 | 0.2760 | -11.9 | 1.0E-32 | 1.3E-31 |
| ENSG00000130517 | PGPEP1    | pyroglutamyl-peptidase I [Source:HGNC Symbol;Acc:HGNC:13568]                                      | 275  | -1.37 | 0.1153 | -11.9 | 1.1E-32 | 1.3E-31 |
| ENSG00000172020 | GAP43     | growth associated protein 43 [Source:HGNC Symbol;Acc:HGNC:4140]                                   | 191  | -2.10 | 0.1762 | -11.9 | 1.1E-32 | 1.3E-31 |
| ENSG00000133789 | SWAP70    | switching B cell complex subunit SWAP70 [Source:HGNC Symbol;Acc:HGNC:17070]                       | 913  | -0.77 | 0.0647 | -11.9 | 1.1E-32 | 1.4E-31 |
| ENSG00000130699 | TAF4      | TATA-box binding protein associated factor 4 [Source:HGNC Symbol;Acc:HGNC:11537]                  | 914  | -0.81 | 0.0683 | -11.9 | 1.5E-32 | 1.8E-31 |
| ENSG00000154122 | ANKH      | ANKH inorganic pyrophosphate transport regulator [Source:HGNC Symbol;Acc:HGNC:15492]              | 1537 | -0.61 | 0.0510 | -11.9 | 1.8E-32 | 2.2E-31 |
| ENSG00000188613 | NANOS1    | nanos C2HC-type zinc finger 1 [Source:HGNC Symbol;Acc:HGNC:23044]                                 | 224  | -1.67 | 0.1410 | -11.9 | 1.9E-32 | 2.2E-31 |
| ENSG00000126882 | FAM78A    | family with sequence similarity 78 member A [Source:HGNC Symbol;Acc:HGNC:25465]                   | 260  | -1.49 | 0.1257 | -11.9 | 2.0E-32 | 2.4E-31 |
| ENSG00000149970 | CNKS2     | connector enhancer of kinase suppressor of Ras 2 [Source:HGNC Symbol;Acc:HGNC:19701]              | 152  | -1.95 | 0.1645 | -11.9 | 2.0E-32 | 2.5E-31 |
| ENSG00000198478 | SH3BGR2   | SH3 domain binding glutamate rich protein like 2 [Source:HGNC Symbol;Acc:HGNC:15567]              | 121  | -2.35 | 0.1988 | -11.8 | 2.8E-32 | 3.3E-31 |
| ENSG00000156218 | ADAMTSL3  | ADAMTS like 3 [Source:HGNC Symbol;Acc:HGNC:14633]                                                 | 256  | -1.45 | 0.1228 | -11.8 | 3.3E-32 | 4.0E-31 |
| ENSG00000197641 | SERPINB13 | serpin family B member 13 [Source:HGNC Symbol;Acc:HGNC:8944]                                      | 262  | -8.57 | 0.7280 | -11.8 | 5.3E-32 | 6.4E-31 |
| ENSG00000164920 | OSR2      | odd-skipped related transcription factor 2 [Source:HGNC Symbol;Acc:HGNC:15830]                    | 1298 | -0.66 | 0.0562 | -11.8 | 6.9E-32 | 8.2E-31 |

|                 |           |                                                                                          |      |       |        |       |         |         |
|-----------------|-----------|------------------------------------------------------------------------------------------|------|-------|--------|-------|---------|---------|
| ENSG00000095585 | BLNK      | B cell linker [Source:HGNC Symbol;Acc:HGNC:14211]                                        | 84   | -3.22 | 0.2740 | -11.7 | 7.1E-32 | 8.4E-31 |
| ENSG00000156463 | SH3RF2    | SH3 domain containing ring finger 2 [Source:HGNC Symbol;Acc:HGNC:26299]                  | 1279 | -0.69 | 0.0592 | -11.7 | 9.6E-32 | 1.1E-30 |
| ENSG00000166396 | SERPINB7  | serpin family B member 7 [Source:HGNC Symbol;Acc:HGNC:13902]                             | 2057 | -0.54 | 0.0463 | -11.7 | 1.0E-31 | 1.2E-30 |
| ENSG00000102554 | KLF5      | Kruppel like factor 5 [Source:HGNC Symbol;Acc:HGNC:6349]                                 | 2168 | -0.56 | 0.0479 | -11.7 | 1.1E-31 | 1.3E-30 |
| ENSG00000158106 | RHPN1     | rhophilin Rho GTPase binding protein 1 [Source:HGNC Symbol;Acc:HGNC:19973]               | 414  | -1.13 | 0.0963 | -11.7 | 1.2E-31 | 1.4E-30 |
| ENSG00000052795 | FNIP2     | folliculin interacting protein 2 [Source:HGNC Symbol;Acc:HGNC:29280]                     | 554  | -0.97 | 0.0835 | -11.7 | 1.6E-31 | 1.9E-30 |
| ENSG00000147526 | TACC1     | transforming acidic coiled-coil containing protein 1 [Source:HGNC Symbol;Acc:HGNC:11522] | 1037 | -0.76 | 0.0648 | -11.7 | 2.0E-31 | 2.4E-30 |
| ENSG00000118418 | HMGN3     | high mobility group nucleosomal binding domain 3 [Source:HGNC Symbol;Acc:HGNC:12312]     | 964  | -0.74 | 0.0634 | -11.6 | 2.8E-31 | 3.3E-30 |
| ENSG00000172716 | SLFN11    | schlafen family member 11 [Source:HGNC Symbol;Acc:HGNC:26633]                            | 211  | -4.47 | 0.3847 | -11.6 | 3.0E-31 | 3.5E-30 |
| ENSG00000116117 | PAR3B     | par-3 family cell polarity regulator beta [Source:HGNC Symbol;Acc:HGNC:14446]            | 186  | -1.77 | 0.1520 | -11.6 | 3.2E-31 | 3.7E-30 |
| ENSG00000236972 | FABP5P1   | fatty acid binding protein 5 pseudogene 1 [Source:HGNC Symbol;Acc:HGNC:31059]            | 147  | -2.13 | 0.1833 | -11.6 | 3.7E-31 | 4.3E-30 |
| ENSG00000129195 | PIMREG    | PICALM interacting mitotic regulator [Source:HGNC Symbol;Acc:HGNC:25483]                 | 1830 | -0.63 | 0.0547 | -11.6 | 4.2E-31 | 4.9E-30 |
| ENSG00000116977 | LGALS8    | galectin 8 [Source:HGNC Symbol;Acc:HGNC:6569]                                            | 762  | -0.84 | 0.0728 | -11.6 | 4.5E-31 | 5.2E-30 |
| ENSG00000170396 | ZNF804A   | zinc finger protein 804A [Source:HGNC Symbol;Acc:HGNC:21711]                             | 101  | -6.18 | 0.5337 | -11.6 | 4.8E-31 | 5.6E-30 |
| ENSG00000114529 | C3orf52   | chromosome 3 open reading frame 52 [Source:HGNC Symbol;Acc:HGNC:26255]                   | 151  | -1.95 | 0.1687 | -11.6 | 4.9E-31 | 5.7E-30 |
| ENSG00000188620 | HMX3      | H6 family homeobox 3 [Source:HGNC Symbol;Acc:HGNC:5019]                                  | 106  | -2.53 | 0.2181 | -11.6 | 5.2E-31 | 6.0E-30 |
| ENSG00000263465 | SRSF8     | serine and arginine rich splicing factor 8 [Source:HGNC Symbol;Acc:HGNC:16988]           | 1013 | -0.70 | 0.0606 | -11.6 | 6.7E-31 | 7.8E-30 |
| ENSG00000143499 | SMYD2     | SET and MYND domain containing 2 [Source:HGNC Symbol;Acc:HGNC:20982]                     | 2451 | -0.52 | 0.0446 | -11.6 | 6.9E-31 | 8.0E-30 |
| ENSG00000182568 | SATB1     | SATB homeobox 1 [Source:HGNC Symbol;Acc:HGNC:10541]                                      | 71   | -4.02 | 0.3475 | -11.6 | 7.0E-31 | 8.1E-30 |
| ENSG00000136160 | EDNRB     | endothelin receptor type B [Source:HGNC Symbol;Acc:HGNC:3180]                            | 94   | -2.63 | 0.2277 | -11.6 | 7.2E-31 | 8.3E-30 |
| ENSG00000154277 | UCHL1     | ubiquitin C-terminal hydrolase L1 [Source:HGNC Symbol;Acc:HGNC:12513]                    | 228  | -1.69 | 0.1462 | -11.5 | 7.6E-31 | 8.8E-30 |
| ENSG00000155755 | TMEM237   | transmembrane protein 237 [Source:HGNC Symbol;Acc:HGNC:14432]                            | 1260 | -0.65 | 0.0559 | -11.5 | 7.7E-31 | 8.9E-30 |
| ENSG00000272894 | MIOS-DT   | MIOS divergent transcript [Source:HGNC Symbol;Acc:HGNC:55187]                            | 263  | -1.43 | 0.1239 | -11.5 | 8.1E-31 | 9.4E-30 |
| ENSG00000089094 | KDM2B     | lysine demethylase 2B [Source:HGNC Symbol;Acc:HGNC:13610]                                | 804  | -0.80 | 0.0690 | -11.5 | 8.3E-31 | 9.6E-30 |
| ENSG00000177822 | TENM3-AS1 | TENM3 antisense RNA 1 [Source:HGNC Symbol;Acc:HGNC:28076]                                | 166  | -1.82 | 0.1577 | -11.5 | 8.4E-31 | 9.7E-30 |
| ENSG00000244462 | RBM12     | RNA binding motif protein 12 [Source:HGNC Symbol;Acc:HGNC:9898]                          | 2490 | -0.50 | 0.0434 | -11.5 | 9.3E-31 | 1.1E-29 |
| ENSG00000133106 | EPST11    | epithelial stromal interaction 1 [Source:HGNC Symbol;Acc:HGNC:16465]                     | 685  | -0.86 | 0.0746 | -11.5 | 1.1E-30 | 1.2E-29 |
| ENSG00000203499 | IQANK1    | IQ motif and ankyrin repeat containing 1 [Source:HGNC Symbol;Acc:HGNC:49576]             | 275  | -1.39 | 0.1207 | -11.5 | 1.2E-30 | 1.4E-29 |
| ENSG00000145916 | RMND5B    | required for meiotic nuclear division 5 homolog B [Source:HGNC Symbol;Acc:HGNC:26181]    | 1386 | -0.62 | 0.0537 | -11.5 | 1.2E-30 | 1.4E-29 |
| ENSG00000033327 | GAB2      | GRB2 associated binding protein 2 [Source:HGNC Symbol;Acc:HGNC:14458]                    | 175  | -1.87 | 0.1626 | -11.5 | 1.3E-30 | 1.5E-29 |
| ENSG00000169169 | CPT1C     | carnitine palmitoyltransferase 1C [Source:HGNC Symbol;Acc:HGNC:18540]                    | 153  | -1.89 | 0.1644 | -11.5 | 1.5E-30 | 1.7E-29 |
| ENSG00000149131 | SERPING1  | serpin family G member 1 [Source:HGNC Symbol;Acc:HGNC:1228]                              | 82   | -3.03 | 0.2639 | -11.5 | 1.6E-30 | 1.9E-29 |
| ENSG00000167552 | TUBA1A    | tubulin alpha 1a [Source:HGNC Symbol;Acc:HGNC:20766]                                     | 1170 | -0.69 | 0.0599 | -11.5 | 1.7E-30 | 1.9E-29 |
| ENSG00000144843 | ADPRH     | ADP-ribosylarginine hydrolase [Source:HGNC Symbol;Acc:HGNC:269]                          | 352  | -1.21 | 0.1054 | -11.5 | 1.8E-30 | 2.1E-29 |
| ENSG00000171206 | TRIM8     | tripartite motif containing 8 [Source:HGNC Symbol;Acc:HGNC:15579]                        | 1381 | -0.66 | 0.0573 | -11.5 | 1.8E-30 | 2.1E-29 |
| ENSG00000029725 | RABEP1    | rabaptin, RAB GTPase binding effector protein 1 [Source:HGNC Symbol;Acc:HGNC:17677]      | 1394 | -0.66 | 0.0578 | -11.5 | 1.9E-30 | 2.1E-29 |
| ENSG00000228526 | MIR34AHG  | MIR34A host gene [Source:HGNC Symbol;Acc:HGNC:51913]                                     | 189  | -1.71 | 0.1489 | -11.5 | 1.9E-30 | 2.1E-29 |
| ENSG00000075651 | PLD1      | phospholipase D1 [Source:HGNC Symbol;Acc:HGNC:9067]                                      | 686  | -0.88 | 0.0764 | -11.5 | 1.9E-30 | 2.1E-29 |
| ENSG00000079432 | CIC       | capicua transcriptional repressor [Source:HGNC Symbol;Acc:HGNC:14214]                    | 2733 | -0.50 | 0.0438 | -11.5 | 1.9E-30 | 2.2E-29 |
| ENSG00000029993 | HMGB3     | high mobility group box 3 [Source:HGNC Symbol;Acc:HGNC:5004]                             | 2114 | -0.54 | 0.0472 | -11.5 | 2.0E-30 | 2.2E-29 |
| ENSG00000171766 | GATM      | glycine amidinotransferase [Source:HGNC Symbol;Acc:HGNC:4175]                            | 203  | -1.59 | 0.1389 | -11.4 | 2.7E-30 | 3.1E-29 |
| ENSG00000065989 | PDE4A     | phosphodiesterase 4A [Source:HGNC Symbol;Acc:HGNC:8780]                                  | 172  | -1.74 | 0.1520 | -11.4 | 3.1E-30 | 3.5E-29 |

|                 |           |                                                                                     |      |       |        |       |         |         |
|-----------------|-----------|-------------------------------------------------------------------------------------|------|-------|--------|-------|---------|---------|
| ENSG00000170006 | TMEM154   | transmembrane protein 154 [Source:HGNC Symbol;Acc:HGNC:26489]                       | 242  | -1.44 | 0.1264 | -11.4 | 3.8E-30 | 4.3E-29 |
| ENSG00000175920 | DOK7      | docking protein 7 [Source:HGNC Symbol;Acc:HGNC:26594]                               | 222  | -1.66 | 0.1457 | -11.4 | 4.2E-30 | 4.8E-29 |
| ENSG00000130762 | ARHGEF16  | Rho guanine nucleotide exchange factor 16 [Source:HGNC Symbol;Acc:HGNC:15515]       | 953  | -0.74 | 0.0647 | -11.4 | 4.3E-30 | 4.9E-29 |
| ENSG00000145911 | N4BP3     | NEDD4 binding protein 3 [Source:HGNC Symbol;Acc:HGNC:29852]                         | 660  | -0.84 | 0.0735 | -11.4 | 4.4E-30 | 5.0E-29 |
| ENSG00000134709 | HOOK1     | hook microtubule tethering protein 1 [Source:HGNC Symbol;Acc:HGNC:19884]            | 550  | -0.93 | 0.0821 | -11.4 | 4.8E-30 | 5.4E-29 |
| ENSG00000043039 | BARX2     | BARX homeobox 2 [Source:HGNC Symbol;Acc:HGNC:956]                                   | 348  | -1.21 | 0.1067 | -11.4 | 5.7E-30 | 6.4E-29 |
| ENSG00000138670 | RASGEF1B  | RasGEF domain family member 1B [Source:HGNC Symbol;Acc:HGNC:24881]                  | 69   | -4.41 | 0.3884 | -11.4 | 6.9E-30 | 7.8E-29 |
| ENSG00000117280 | RAB29     | RAB29, member RAS oncogene family [Source:HGNC Symbol;Acc:HGNC:9789]                | 316  | -1.39 | 0.1224 | -11.4 | 7.4E-30 | 8.3E-29 |
| ENSG00000166272 | WBP1L     | VW domain binding protein 1 like [Source:HGNC Symbol;Acc:HGNC:23510]                | 1446 | -0.60 | 0.0528 | -11.3 | 9.0E-30 | 1.0E-28 |
| ENSG00000140044 | JDP2      | Jun dimerization protein 2 [Source:HGNC Symbol;Acc:HGNC:17546]                      | 987  | -0.76 | 0.0669 | -11.3 | 1.0E-29 | 1.1E-28 |
| ENSG00000127328 | RAB3IP    | RAB3A interacting protein [Source:HGNC Symbol;Acc:HGNC:16508]                       | 480  | -1.00 | 0.0886 | -11.3 | 1.1E-29 | 1.2E-28 |
| ENSG00000172005 | MAL       | mal, T cell differentiation protein [Source:HGNC Symbol;Acc:HGNC:6817]              | 77   | -3.21 | 0.2838 | -11.3 | 1.2E-29 | 1.3E-28 |
| ENSG00000073910 | FRY       | FRY microtubule binding protein [Source:HGNC Symbol;Acc:HGNC:20367]                 | 71   | -3.76 | 0.3332 | -11.3 | 1.8E-29 | 2.0E-28 |
| ENSG00000165168 | CYBB      | cytochrome b-245 beta chain [Source:HGNC Symbol;Acc:HGNC:2578]                      | 120  | -2.24 | 0.1988 | -11.3 | 2.0E-29 | 2.2E-28 |
| ENSG00000062282 | DGAT2     | diacylglycerol O-acyltransferase 2 [Source:HGNC Symbol;Acc:HGNC:16940]              | 141  | -2.01 | 0.1785 | -11.3 | 2.2E-29 | 2.5E-28 |
| ENSG00000141429 | GALNT1    | polypeptide N-acetylgalactosaminyltransferase 1 [Source:HGNC Symbol;Acc:HGNC:4123]  | 1643 | -0.59 | 0.0523 | -11.3 | 2.3E-29 | 2.5E-28 |
| ENSG00000124104 | SNX21     | sorting nexin family member 21 [Source:HGNC Symbol;Acc:HGNC:16154]                  | 657  | -0.97 | 0.0862 | -11.2 | 2.7E-29 | 3.0E-28 |
| ENSG00000183049 | CAMK1D    | calcium/calmodulin dependent protein kinase ID [Source:HGNC Symbol;Acc:HGNC:19341]  | 402  | -1.12 | 0.1000 | -11.2 | 3.0E-29 | 3.3E-28 |
| ENSG00000186665 | C17orf58  | chromosome 17 open reading frame 58 [Source:HGNC Symbol;Acc:HGNC:27568]             | 311  | -1.29 | 0.1150 | -11.2 | 3.4E-29 | 3.8E-28 |
| ENSG00000253719 | ATXN7L3B  | ataxin 7 like 3B [Source:HGNC Symbol;Acc:HGNC:37931]                                | 1636 | -0.58 | 0.0513 | -11.2 | 3.5E-29 | 3.9E-28 |
| ENSG00000109846 | CRYAB     | crystallin alpha B [Source:HGNC Symbol;Acc:HGNC:2389]                               | 173  | -1.83 | 0.1632 | -11.2 | 3.5E-29 | 3.9E-28 |
| ENSG00000104892 | KLC3      | kinesin light chain 3 [Source:HGNC Symbol;Acc:HGNC:20717]                           | 563  | -0.99 | 0.0880 | -11.2 | 3.8E-29 | 4.2E-28 |
| ENSG00000100028 | SNRPD3    | small nuclear ribonucleoprotein D3 polypeptide [Source:HGNC Symbol;Acc:HGNC:11160]  | 781  | -0.78 | 0.0694 | -11.2 | 4.0E-29 | 4.5E-28 |
| ENSG00000179151 | EDC3      | enhancer of mRNA decapping 3 [Source:HGNC Symbol;Acc:HGNC:26114]                    | 1254 | -0.64 | 0.0569 | -11.2 | 4.3E-29 | 4.8E-28 |
| ENSG00000157456 | CCNB2     | cyclin B2 [Source:HGNC Symbol;Acc:HGNC:1580]                                        | 1639 | -0.55 | 0.0496 | -11.2 | 4.4E-29 | 4.8E-28 |
| ENSG00000155465 | SLC7A7    | solute carrier family 7 member 7 [Source:HGNC Symbol;Acc:HGNC:11065]                | 113  | -2.27 | 0.2031 | -11.2 | 4.7E-29 | 5.2E-28 |
| ENSG00000162458 | FBLIM1    | filamin binding LIM protein 1 [Source:HGNC Symbol;Acc:HGNC:24686]                   | 1864 | -0.55 | 0.0496 | -11.2 | 4.8E-29 | 5.3E-28 |
| ENSG00000170214 | ADRA1B    | adrenoceptor alpha 1B [Source:HGNC Symbol;Acc:HGNC:278]                             | 387  | -1.08 | 0.0966 | -11.2 | 6.1E-29 | 6.7E-28 |
| ENSG00000263711 | LINC02864 | long intergenic non-protein coding RNA 2864 [Source:HGNC Symbol;Acc:HGNC:54480]     | 180  | -5.06 | 0.4538 | -11.1 | 7.9E-29 | 8.6E-28 |
| ENSG00000134627 | PIWIL4    | piwi like RNA-mediated gene silencing 4 [Source:HGNC Symbol;Acc:HGNC:18444]         | 67   | -3.75 | 0.3369 | -11.1 | 9.4E-29 | 1.0E-27 |
| ENSG00000157064 | NMNAT2    | nicotinamide nucleotide adenyltransferase 2 [Source:HGNC Symbol;Acc:HGNC:16789]     | 146  | -1.87 | 0.1681 | -11.1 | 9.5E-29 | 1.0E-27 |
| ENSG00000131069 | ACSS2     | acyl-CoA synthetase short chain family member 2 [Source:HGNC Symbol;Acc:HGNC:15814] | 1788 | -0.56 | 0.0503 | -11.1 | 9.7E-29 | 1.1E-27 |
| ENSG00000110811 | P3H3      | prolyl 3-hydroxylase 3 [Source:HGNC Symbol;Acc:HGNC:19318]                          | 151  | -1.85 | 0.1666 | -11.1 | 1.0E-28 | 1.1E-27 |
| ENSG00000164603 | BMT2      | base methyltransferase of 25S rRNA 2 homolog [Source:HGNC Symbol;Acc:HGNC:26475]    | 336  | -1.16 | 0.1040 | -11.1 | 1.1E-28 | 1.2E-27 |
| ENSG00000204308 | RNF5      | ring finger protein 5 [Source:HGNC Symbol;Acc:HGNC:10068]                           | 1502 | -0.67 | 0.0604 | -11.1 | 1.1E-28 | 1.2E-27 |
| ENSG00000175893 | ZDHHC21   | zinc finger DHHC-type palmitoyltransferase 21 [Source:HGNC Symbol;Acc:HGNC:20750]   | 593  | -0.86 | 0.0779 | -11.1 | 1.1E-28 | 1.2E-27 |
| ENSG00000092295 | TGM1      | transglutaminase 1 [Source:HGNC Symbol;Acc:HGNC:11777]                              | 300  | -1.25 | 0.1128 | -11.1 | 1.5E-28 | 1.6E-27 |
| ENSG00000143355 | LHX9      | LIM homeobox 9 [Source:HGNC Symbol;Acc:HGNC:14222]                                  | 76   | -2.98 | 0.2694 | -11.1 | 1.6E-28 | 1.8E-27 |
| ENSG00000198646 | NCOA6     | nuclear receptor coactivator 6 [Source:HGNC Symbol;Acc:HGNC:15936]                  | 1896 | -0.54 | 0.0486 | -11.1 | 1.7E-28 | 1.8E-27 |
| ENSG00000185290 | NUPR2     | nuclear protein 2, transcriptional regulator [Source:HGNC Symbol;Acc:HGNC:44164]    | 64   | -4.21 | 0.3811 | -11.1 | 2.0E-28 | 2.1E-27 |
| ENSG00000128805 | ARHGAP22  | Rho GTPase activating protein 22 [Source:HGNC Symbol;Acc:HGNC:30320]                | 66   | -4.12 | 0.3724 | -11.1 | 2.1E-28 | 2.3E-27 |
| ENSG00000068078 | FGFR3     | fibroblast growth factor receptor 3 [Source:HGNC Symbol;Acc:HGNC:3690]              | 377  | -1.19 | 0.1079 | -11.0 | 2.3E-28 | 2.4E-27 |

|                 |           |                                                                                                    |      |       |        |       |         |         |
|-----------------|-----------|----------------------------------------------------------------------------------------------------|------|-------|--------|-------|---------|---------|
| ENSG00000163820 | FYCO1     | FYVE and coiled-coil domain autophagy adaptor 1 [Source:HGNC Symbol;Acc:HGNC:14673]                | 503  | -1.01 | 0.0919 | -11.0 | 2.3E-28 | 2.4E-27 |
| ENSG00000120008 | WDR11     | WD repeat domain 11 [Source:HGNC Symbol;Acc:HGNC:13831]                                            | 1915 | -0.51 | 0.0466 | -11.0 | 2.3E-28 | 2.5E-27 |
| ENSG00000141425 | RPRD1A    | regulation of nuclear pre-mRNA domain containing 1A [Source:HGNC Symbol;Acc:HGNC:25560]            | 1117 | -0.66 | 0.0596 | -11.0 | 2.3E-28 | 2.5E-27 |
| ENSG00000163517 | HDAC11    | histone deacetylase 11 [Source:HGNC Symbol;Acc:HGNC:19086]                                         | 451  | -1.01 | 0.0914 | -11.0 | 2.3E-28 | 2.5E-27 |
| ENSG00000198105 | ZNF248    | zinc finger protein 248 [Source:HGNC Symbol;Acc:HGNC:13041]                                        | 375  | -1.13 | 0.1023 | -11.0 | 2.5E-28 | 2.7E-27 |
| ENSG00000226742 | HSBP1L1   | heat shock factor binding protein 1 like 1 [Source:HGNC Symbol;Acc:HGNC:37243]                     | 487  | -1.00 | 0.0906 | -11.0 | 3.3E-28 | 3.6E-27 |
| ENSG00000188690 | UROS      | uroporphyrinogen III synthase [Source:HGNC Symbol;Acc:HGNC:12592]                                  | 1822 | -0.53 | 0.0481 | -11.0 | 3.4E-28 | 3.6E-27 |
| ENSG00000196072 | BLOC1S2   | biogenesis of lysosomal organelles complex 1 subunit 2 [Source:HGNC Symbol;Acc:HGNC:20984]         | 1036 | -0.68 | 0.0622 | -11.0 | 3.7E-28 | 4.0E-27 |
| ENSG00000183020 | AP2A2     | adaptor related protein complex 2 subunit alpha 2 [Source:HGNC Symbol;Acc:HGNC:562]                | 796  | -0.75 | 0.0686 | -11.0 | 4.6E-28 | 4.9E-27 |
| ENSG00000118193 | KIF14     | kinesin family member 14 [Source:HGNC Symbol;Acc:HGNC:19181]                                       | 951  | -0.71 | 0.0644 | -11.0 | 4.9E-28 | 5.2E-27 |
| ENSG00000033800 | PIAS1     | protein inhibitor of activated STAT 1 [Source:HGNC Symbol;Acc:HGNC:2752]                           | 930  | -0.72 | 0.0653 | -11.0 | 5.7E-28 | 6.0E-27 |
| ENSG00000136828 | RALGSP1   | Ral GEF with PH domain and SH3 binding motif 1 [Source:HGNC Symbol;Acc:HGNC:16851]                 | 135  | -2.06 | 0.1877 | -11.0 | 6.1E-28 | 6.5E-27 |
| ENSG00000163083 | INHBB     | inhibin subunit beta B [Source:HGNC Symbol;Acc:HGNC:6067]                                          | 117  | -2.20 | 0.2006 | -10.9 | 6.7E-28 | 7.1E-27 |
| ENSG00000184564 | SLITRK6   | SLIT and NTRK like family member 6 [Source:HGNC Symbol;Acc:HGNC:23503]                             | 249  | -1.40 | 0.1280 | -10.9 | 6.7E-28 | 7.1E-27 |
| ENSG00000196371 | FUT4      | fucosyltransferase 4 [Source:HGNC Symbol;Acc:HGNC:4015]                                            | 208  | -1.53 | 0.1397 | -10.9 | 7.6E-28 | 8.0E-27 |
| ENSG00000095015 | MAP3K1    | mitogen-activated protein kinase kinase kinase 1 [Source:HGNC Symbol;Acc:HGNC:6848]                | 557  | -0.88 | 0.0809 | -10.9 | 7.7E-28 | 8.1E-27 |
| ENSG00000078804 | TP53INP2  | tumor protein p53 inducible nuclear protein 2 [Source:HGNC Symbol;Acc:HGNC:16104]                  | 689  | -0.82 | 0.0748 | -10.9 | 7.8E-28 | 8.3E-27 |
| ENSG00000136108 | CKAP2     | cytoskeleton associated protein 2 [Source:HGNC Symbol;Acc:HGNC:1990]                               | 1287 | -0.61 | 0.0554 | -10.9 | 8.0E-28 | 8.5E-27 |
| ENSG00000141068 | KSR1      | kinase suppressor of ras 1 [Source:HGNC Symbol;Acc:HGNC:6465]                                      | 500  | -0.97 | 0.0884 | -10.9 | 8.6E-28 | 9.1E-27 |
| ENSG00000172331 | BPGM      | bisphosphoglycerate mutase [Source:HGNC Symbol;Acc:HGNC:1093]                                      | 367  | -1.11 | 0.1023 | -10.9 | 1.3E-27 | 1.4E-26 |
| ENSG00000088854 | C20orf194 | chromosome 20 open reading frame 194 [Source:HGNC Symbol;Acc:HGNC:17721]                           | 589  | -0.85 | 0.0780 | -10.8 | 2.3E-27 | 2.4E-26 |
| ENSG00000169836 | TACR3     | tachykinin receptor 3 [Source:HGNC Symbol;Acc:HGNC:11528]                                          | 100  | -6.59 | 0.6089 | -10.8 | 2.9E-27 | 3.0E-26 |
| ENSG00000180730 | SHISA2    | shisa family member 2 [Source:HGNC Symbol;Acc:HGNC:20366]                                          | 91   | -2.55 | 0.2364 | -10.8 | 3.1E-27 | 3.2E-26 |
| ENSG00000146373 | RNF217    | ring finger protein 217 [Source:HGNC Symbol;Acc:HGNC:21487]                                        | 891  | -0.75 | 0.0699 | -10.8 | 4.2E-27 | 4.4E-26 |
| ENSG00000070190 | DAPP1     | dual adaptor of phosphotyrosine and 3-phosphoinositides 1 [Source:HGNC Symbol;Acc:HGNC:16500]      | 896  | -0.69 | 0.0644 | -10.8 | 4.9E-27 | 5.1E-26 |
| ENSG00000189319 | FAM53B    | family with sequence similarity 53 member B [Source:HGNC Symbol;Acc:HGNC:28968]                    | 878  | -0.73 | 0.0678 | -10.8 | 5.1E-27 | 5.3E-26 |
| ENSG00000175895 | PLEKHF2   | pleckstrin homology and FYVE domain containing 2 [Source:HGNC Symbol;Acc:HGNC:20757]               | 784  | -0.76 | 0.0703 | -10.8 | 5.4E-27 | 5.6E-26 |
| ENSG00000056291 | NPFFR2    | neuropeptide FF receptor 2 [Source:HGNC Symbol;Acc:HGNC:4525]                                      | 78   | -5.79 | 0.5389 | -10.8 | 5.8E-27 | 6.0E-26 |
| ENSG00000167183 | PRR15L    | proline rich 15 like [Source:HGNC Symbol;Acc:HGNC:28149]                                           | 64   | -3.43 | 0.3193 | -10.7 | 6.0E-27 | 6.2E-26 |
| ENSG00000104140 | RHOV      | ras homolog family member V [Source:HGNC Symbol;Acc:HGNC:18313]                                    | 1755 | -0.55 | 0.0515 | -10.7 | 6.4E-27 | 6.6E-26 |
| ENSG00000163171 | CDC42EP3  | CDC42 effector protein 3 [Source:HGNC Symbol;Acc:HGNC:16943]                                       | 1968 | -0.50 | 0.0469 | -10.7 | 8.3E-27 | 8.5E-26 |
| ENSG00000213341 | CHUK      | component of inhibitor of nuclear factor kappa B kinase complex [Source:HGNC Symbol;Acc:HGNC:1974] | 1262 | -0.59 | 0.0551 | -10.7 | 9.4E-27 | 9.6E-26 |
| ENSG00000149582 | TMEM25    | transmembrane protein 25 [Source:HGNC Symbol;Acc:HGNC:25890]                                       | 383  | -1.06 | 0.0987 | -10.7 | 1.0E-26 | 1.0E-25 |
| ENSG00000120675 | DNAJC15   | DnaJ heat shock protein family (Hsp40) member C15 [Source:HGNC Symbol;Acc:HGNC:20325]              | 841  | -0.73 | 0.0682 | -10.7 | 1.6E-26 | 1.6E-25 |
| ENSG00000198924 | DCLRE1A   | DNA cross-link repair 1A [Source:HGNC Symbol;Acc:HGNC:17660]                                       | 760  | -0.81 | 0.0757 | -10.6 | 1.8E-26 | 1.8E-25 |
| ENSG00000116251 | RPL22     | ribosomal protein L22 [Source:HGNC Symbol;Acc:HGNC:10315]                                          | 1814 | -0.53 | 0.0494 | -10.6 | 1.8E-26 | 1.8E-25 |
| ENSG00000100647 | SUSD6     | sushi domain containing 6 [Source:HGNC Symbol;Acc:HGNC:19956]                                      | 723  | -0.80 | 0.0749 | -10.6 | 2.1E-26 | 2.1E-25 |
| ENSG00000143341 | HMCN1     | hemicentin 1 [Source:HGNC Symbol;Acc:HGNC:19194]                                                   | 60   | -4.37 | 0.4115 | -10.6 | 2.6E-26 | 2.6E-25 |
| ENSG00000152192 | POU4F1    | POU class 4 homeobox 1 [Source:HGNC Symbol;Acc:HGNC:9218]                                          | 65   | -3.28 | 0.3096 | -10.6 | 2.9E-26 | 2.9E-25 |
| ENSG00000088356 | PDRG1     | p53 and DNA damage regulated 1 [Source:HGNC Symbol;Acc:HGNC:16119]                                 | 1597 | -0.56 | 0.0531 | -10.6 | 2.9E-26 | 2.9E-25 |
| ENSG00000241839 | PLEKHO2   | pleckstrin homology domain containing O2 [Source:HGNC Symbol;Acc:HGNC:30026]                       | 188  | -1.60 | 0.1506 | -10.6 | 3.0E-26 | 3.1E-25 |
| ENSG00000111052 | LIN7A     | lin-7 homolog A, crumbs cell polarity complex component [Source:HGNC Symbol;Acc:HGNC:17787]        | 60   | -4.19 | 0.3960 | -10.6 | 3.4E-26 | 3.4E-25 |



|                 |           |                                                                                                 |      |       |        |       |         |         |
|-----------------|-----------|-------------------------------------------------------------------------------------------------|------|-------|--------|-------|---------|---------|
| ENSG00000196872 | CRACDL    | CRACD like [Source:HGNC Symbol;Acc:HGNC:33454]                                                  | 188  | -1.52 | 0.1434 | -10.6 | 3.5E-26 | 3.5E-25 |
| ENSG00000172382 | PRSS27    | serine protease 27 [Source:HGNC Symbol;Acc:HGNC:15475]                                          | 258  | -1.25 | 0.1183 | -10.6 | 3.5E-26 | 3.5E-25 |
| ENSG00000132561 | MATN2     | matrilin 2 [Source:HGNC Symbol;Acc:HGNC:6908]                                                   | 1975 | -0.50 | 0.0474 | -10.6 | 3.9E-26 | 3.9E-25 |
| ENSG00000154153 | RETREG1   | reticulophagy regulator 1 [Source:HGNC Symbol;Acc:HGNC:25964]                                   | 665  | -0.77 | 0.0731 | -10.6 | 4.3E-26 | 4.3E-25 |
| ENSG00000087128 | TMPRSS11E | transmembrane serine protease 11E [Source:HGNC Symbol;Acc:HGNC:24465]                           | 309  | -1.21 | 0.1144 | -10.6 | 4.5E-26 | 4.6E-25 |
| ENSG00000185909 | KLHDC8B   | kelch domain containing 8B [Source:HGNC Symbol;Acc:HGNC:28557]                                  | 406  | -0.99 | 0.0937 | -10.6 | 4.9E-26 | 5.0E-25 |
| ENSG00000197296 | FITM2     | fat storage inducing transmembrane protein 2 [Source:HGNC Symbol;Acc:HGNC:16135]                | 1527 | -0.54 | 0.0511 | -10.6 | 5.0E-26 | 5.1E-25 |
| ENSG00000149679 | CABLES2   | Cdk5 and Abl enzyme substrate 2 [Source:HGNC Symbol;Acc:HGNC:16143]                             | 698  | -0.80 | 0.0763 | -10.5 | 5.7E-26 | 5.7E-25 |
| ENSG00000174282 | ZBTB4     | zinc finger and BTB domain containing 4 [Source:HGNC Symbol;Acc:HGNC:23847]                     | 403  | -1.11 | 0.1050 | -10.5 | 6.2E-26 | 6.2E-25 |
| ENSG00000140563 | MCTP2     | multiple C2 and transmembrane domain containing 2 [Source:HGNC Symbol;Acc:HGNC:25636]           | 182  | -1.55 | 0.1472 | -10.5 | 6.4E-26 | 6.4E-25 |
| ENSG00000134313 | KIDINS220 | kinase D interacting substrate 220 [Source:HGNC Symbol;Acc:HGNC:29508]                          | 1646 | -0.54 | 0.0509 | -10.5 | 6.6E-26 | 6.6E-25 |
| ENSG00000114631 | PODXL2    | podocalyxin like 2 [Source:HGNC Symbol;Acc:HGNC:17936]                                          | 312  | -1.16 | 0.1106 | -10.5 | 7.2E-26 | 7.1E-25 |
| ENSG00000174775 | HRAS      | HRas proto-oncogene, GTPase [Source:HGNC Symbol;Acc:HGNC:5173]                                  | 1205 | -0.60 | 0.0571 | -10.5 | 7.2E-26 | 7.2E-25 |
| ENSG00000169554 | ZEB2      | zinc finger E-box binding homeobox 2 [Source:HGNC Symbol;Acc:HGNC:14881]                        | 72   | -3.04 | 0.2889 | -10.5 | 7.8E-26 | 7.8E-25 |
| ENSG00000170801 | HTRA3     | HtrA serine peptidase 3 [Source:HGNC Symbol;Acc:HGNC:30406]                                     | 70   | -2.91 | 0.2774 | -10.5 | 8.0E-26 | 8.0E-25 |
| ENSG00000104870 | FCGRT     | Fc fragment of IgG receptor and transporter [Source:HGNC Symbol;Acc:HGNC:3621]                  | 528  | -0.94 | 0.0892 | -10.5 | 8.1E-26 | 8.1E-25 |
| ENSG00000151320 | AKAP6     | A-kinase anchoring protein 6 [Source:HGNC Symbol;Acc:HGNC:376]                                  | 112  | -2.06 | 0.1960 | -10.5 | 9.4E-26 | 9.4E-25 |
| ENSG00000163638 | ADAMTS9   | ADAM metallopeptidase with thrombospondin type 1 motif 9 [Source:HGNC Symbol;Acc:HGNC:13202]    | 1191 | -0.64 | 0.0613 | -10.5 | 1.0E-25 | 1.0E-24 |
| ENSG00000165152 | PGAP4     | post-GPI attachment to proteins GalNAc transferase 4 [Source:HGNC Symbol;Acc:HGNC:28180]        | 823  | -0.72 | 0.0686 | -10.5 | 1.3E-25 | 1.3E-24 |
| ENSG00000169905 | TOR1AIP2  | torsin 1A interacting protein 2 [Source:HGNC Symbol;Acc:HGNC:24055]                             | 1324 | -0.56 | 0.0532 | -10.5 | 1.5E-25 | 1.4E-24 |
| ENSG00000148677 | ANKRD1    | ankyrin repeat domain 1 [Source:HGNC Symbol;Acc:HGNC:15819]                                     | 568  | -0.92 | 0.0879 | -10.4 | 1.5E-25 | 1.5E-24 |
| ENSG00000110723 | EXPH5     | exophilin 5 [Source:HGNC Symbol;Acc:HGNC:30578]                                                 | 250  | -1.30 | 0.1245 | -10.4 | 1.8E-25 | 1.8E-24 |
| ENSG00000173269 | MMRN2     | multimerin 2 [Source:HGNC Symbol;Acc:HGNC:19888]                                                | 142  | -1.75 | 0.1682 | -10.4 | 1.9E-25 | 1.8E-24 |
| ENSG00000073282 | TP63      | tumor protein p63 [Source:HGNC Symbol;Acc:HGNC:15979]                                           | 64   | -3.38 | 0.3253 | -10.4 | 2.6E-25 | 2.5E-24 |
| ENSG00000157388 | CACNA1D   | calcium voltage-gated channel subunit alpha1 D [Source:HGNC Symbol;Acc:HGNC:1391]               | 321  | -1.12 | 0.1073 | -10.4 | 2.8E-25 | 2.8E-24 |
| ENSG00000214022 | REPIN1    | replication initiator 1 [Source:HGNC Symbol;Acc:HGNC:17922]                                     | 1928 | -0.53 | 0.0514 | -10.4 | 3.2E-25 | 3.2E-24 |
| ENSG00000116741 | RGS2      | regulator of G protein signaling 2 [Source:HGNC Symbol;Acc:HGNC:9998]                           | 190  | -1.50 | 0.1450 | -10.4 | 3.5E-25 | 3.4E-24 |
| ENSG00000117593 | DARS2     | aspartyl-tRNA synthetase 2, mitochondrial [Source:HGNC Symbol;Acc:HGNC:25538]                   | 1004 | -0.65 | 0.0623 | -10.4 | 3.8E-25 | 3.7E-24 |
| ENSG00000100290 | BIK       | BCL2 interacting killer [Source:HGNC Symbol;Acc:HGNC:1051]                                      | 130  | -1.88 | 0.1817 | -10.4 | 3.9E-25 | 3.8E-24 |
| ENSG00000165178 | NCF1C     | neutrophil cytosolic factor 1C pseudogene [Source:HGNC Symbol;Acc:HGNC:32523]                   | 99   | -2.60 | 0.2506 | -10.4 | 4.0E-25 | 3.9E-24 |
| ENSG00000074370 | ATP2A3    | ATPase sarcoplasmic/endoplasmic reticulum Ca2+ transporting 3 [Source:HGNC Symbol;Acc:HGNC:813] | 103  | -2.14 | 0.2063 | -10.4 | 4.2E-25 | 4.1E-24 |
| ENSG00000115604 | IL18R1    | interleukin 18 receptor 1 [Source:HGNC Symbol;Acc:HGNC:5988]                                    | 60   | -3.49 | 0.3374 | -10.3 | 4.3E-25 | 4.2E-24 |
| ENSG00000130158 | DOCK6     | dedicator of cytokinesis 6 [Source:HGNC Symbol;Acc:HGNC:19189]                                  | 655  | -0.77 | 0.0744 | -10.3 | 5.0E-25 | 4.8E-24 |
| ENSG00000159450 | TCHH      | trichohyalin [Source:HGNC Symbol;Acc:HGNC:11791]                                                | 298  | -1.18 | 0.1139 | -10.3 | 5.0E-25 | 4.9E-24 |
| ENSG00000234964 | FABP5P7   | fatty acid binding protein 5 pseudogene 7 [Source:HGNC Symbol;Acc:HGNC:31070]                   | 111  | -2.07 | 0.2011 | -10.3 | 6.2E-25 | 6.1E-24 |
| ENSG00000136379 | ABHD17C   | abhydrolase domain containing 17C, depalmitoylase [Source:HGNC Symbol;Acc:HGNC:26925]           | 406  | -0.97 | 0.0943 | -10.3 | 6.8E-25 | 6.6E-24 |
| ENSG00000133131 | MORC4     | MORC family CW-type zinc finger 4 [Source:HGNC Symbol;Acc:HGNC:23485]                           | 486  | -0.89 | 0.0868 | -10.3 | 7.2E-25 | 6.9E-24 |
| ENSG00000183779 | ZNF703    | zinc finger protein 703 [Source:HGNC Symbol;Acc:HGNC:25883]                                     | 195  | -1.47 | 0.1424 | -10.3 | 7.2E-25 | 7.0E-24 |
| ENSG00000150540 | HNMT      | histamine N-methyltransferase [Source:HGNC Symbol;Acc:HGNC:5028]                                | 57   | -4.52 | 0.4394 | -10.3 | 7.3E-25 | 7.1E-24 |
| ENSG00000177694 | NAALADL2  | N-acetylated alpha-linked acidic dipeptidase like 2 [Source:HGNC Symbol;Acc:HGNC:23219]         | 84   | -2.41 | 0.2337 | -10.3 | 7.5E-25 | 7.2E-24 |
| ENSG00000177335 | C8orf31   | chromosome 8 open reading frame 31 [Source:HGNC Symbol;Acc:HGNC:26731]                          | 94   | -2.31 | 0.2249 | -10.3 | 8.4E-25 | 8.1E-24 |
| ENSG00000109436 | TBC1D9    | TBC1 domain family member 9 [Source:HGNC Symbol;Acc:HGNC:21710]                                 | 1028 | -0.62 | 0.0607 | -10.3 | 8.9E-25 | 8.6E-24 |

|                 |           |                                                                                                 |      |       |        |       |         |         |
|-----------------|-----------|-------------------------------------------------------------------------------------------------|------|-------|--------|-------|---------|---------|
| ENSG00000050165 | DKK3      | dickkopf WNT signaling pathway inhibitor 3 [Source:HGNC Symbol;Acc:HGNC:2893]                   | 234  | -1.35 | 0.1314 | -10.3 | 9.4E-25 | 9.1E-24 |
| ENSG00000066926 | FECH      | ferrochelatase [Source:HGNC Symbol;Acc:HGNC:3647]                                               | 1026 | -0.63 | 0.0611 | -10.3 | 1.1E-24 | 1.0E-23 |
| ENSG00000140474 | ULK3      | unc-51 like kinase 3 [Source:HGNC Symbol;Acc:HGNC:19703]                                        | 1091 | -0.60 | 0.0581 | -10.2 | 1.3E-24 | 1.2E-23 |
| ENSG00000134765 | DSC1      | desmocollin 1 [Source:HGNC Symbol;Acc:HGNC:3035]                                                | 57   | -3.56 | 0.3479 | -10.2 | 1.4E-24 | 1.4E-23 |
| ENSG00000159403 | C1R       | complement C1r [Source:HGNC Symbol;Acc:HGNC:1246]                                               | 86   | -2.35 | 0.2295 | -10.2 | 1.6E-24 | 1.5E-23 |
| ENSG00000117036 | ETV3      | ETS variant transcription factor 3 [Source:HGNC Symbol;Acc:HGNC:3492]                           | 1255 | -0.62 | 0.0610 | -10.2 | 1.8E-24 | 1.7E-23 |
| ENSG00000079459 | FDFT1     | farnesyl-diphosphate farnesyltransferase 1 [Source:HGNC Symbol;Acc:HGNC:3629]                   | 1827 | -0.53 | 0.0521 | -10.2 | 1.9E-24 | 1.8E-23 |
| ENSG00000065833 | ME1       | malic enzyme 1 [Source:HGNC Symbol;Acc:HGNC:6983]                                               | 624  | -0.79 | 0.0772 | -10.2 | 1.9E-24 | 1.8E-23 |
| ENSG00000077274 | CAPN6     | calpain 6 [Source:HGNC Symbol;Acc:HGNC:1483]                                                    | 66   | -5.55 | 0.5445 | -10.2 | 2.0E-24 | 1.9E-23 |
| ENSG00000123094 | RASSF8    | Ras association domain family member 8 [Source:HGNC Symbol;Acc:HGNC:13232]                      | 1213 | -0.62 | 0.0607 | -10.2 | 2.1E-24 | 2.0E-23 |
| ENSG00000184481 | FOXO4     | forkhead box O4 [Source:HGNC Symbol;Acc:HGNC:7139]                                              | 115  | -1.95 | 0.1916 | -10.2 | 2.1E-24 | 2.0E-23 |
| ENSG00000175395 | ZNF25     | zinc finger protein 25 [Source:HGNC Symbol;Acc:HGNC:13043]                                      | 133  | -1.79 | 0.1752 | -10.2 | 2.1E-24 | 2.0E-23 |
| ENSG00000235098 | ANKRD65   | ankyrin repeat domain 65 [Source:HGNC Symbol;Acc:HGNC:42950]                                    | 56   | -4.72 | 0.4646 | -10.2 | 2.8E-24 | 2.6E-23 |
| ENSG00000162552 | WNT4      | Wnt family member 4 [Source:HGNC Symbol;Acc:HGNC:12783]                                         | 81   | -2.59 | 0.2550 | -10.2 | 3.0E-24 | 2.8E-23 |
| ENSG00000128165 | ADM2      | adrenomedullin 2 [Source:HGNC Symbol;Acc:HGNC:28898]                                            | 181  | -1.49 | 0.1469 | -10.2 | 3.2E-24 | 3.0E-23 |
| ENSG00000171365 | CLCN5     | chloride voltage-gated channel 5 [Source:HGNC Symbol;Acc:HGNC:2023]                             | 526  | -0.96 | 0.0948 | -10.2 | 3.3E-24 | 3.1E-23 |
| ENSG00000163131 | CTSS      | cathepsin S [Source:HGNC Symbol;Acc:HGNC:2545]                                                  | 89   | -2.34 | 0.2309 | -10.1 | 4.2E-24 | 4.0E-23 |
| ENSG00000143845 | ETNK2     | ethanolamine kinase 2 [Source:HGNC Symbol;Acc:HGNC:25575]                                       | 507  | -0.89 | 0.0875 | -10.1 | 4.3E-24 | 4.0E-23 |
| ENSG00000236975 | LINC02814 | long intergenic non-protein coding RNA 2814 [Source:HGNC Symbol;Acc:HGNC:54346]                 | 93   | -2.33 | 0.2303 | -10.1 | 4.4E-24 | 4.1E-23 |
| ENSG00000121741 | ZMYM2     | zinc finger MYM-type containing 2 [Source:HGNC Symbol;Acc:HGNC:12989]                           | 887  | -0.66 | 0.0650 | -10.1 | 5.0E-24 | 4.7E-23 |
| ENSG00000133134 | BEX2      | brain expressed X-linked 2 [Source:HGNC Symbol;Acc:HGNC:30933]                                  | 215  | -1.40 | 0.1383 | -10.1 | 5.4E-24 | 5.0E-23 |
| ENSG00000128833 | MYO5C     | myosin VC [Source:HGNC Symbol;Acc:HGNC:7604]                                                    | 214  | -1.50 | 0.1485 | -10.1 | 5.8E-24 | 5.5E-23 |
| ENSG00000131061 | ZNF341    | zinc finger protein 341 [Source:HGNC Symbol;Acc:HGNC:15992]                                     | 484  | -0.88 | 0.0873 | -10.1 | 7.5E-24 | 7.0E-23 |
| ENSG00000183762 | KREMEN1   | kringle containing transmembrane protein 1 [Source:HGNC Symbol;Acc:HGNC:17550]                  | 429  | -0.93 | 0.0922 | -10.1 | 7.9E-24 | 7.4E-23 |
| ENSG00000160307 | S100B     | S100 calcium binding protein B [Source:HGNC Symbol;Acc:HGNC:10500]                              | 69   | -2.76 | 0.2746 | -10.1 | 8.3E-24 | 7.8E-23 |
| ENSG00000153930 | ANKFN1    | ankyrin repeat and fibronectin type III domain containing 1 [Source:HGNC Symbol;Acc:HGNC:26766] | 182  | -8.46 | 0.8408 | -10.1 | 8.4E-24 | 7.8E-23 |
| ENSG00000168769 | TET2      | tet methylcytosine dioxygenase 2 [Source:HGNC Symbol;Acc:HGNC:25941]                            | 882  | -0.65 | 0.0644 | -10.1 | 8.6E-24 | 8.0E-23 |
| ENSG00000055118 | KCNH2     | potassium voltage-gated channel subfamily H member 2 [Source:HGNC Symbol;Acc:HGNC:6251]         | 92   | -2.16 | 0.2152 | -10.1 | 8.9E-24 | 8.3E-23 |
| ENSG00000130714 | POMT1     | protein O-mannosyltransferase 1 [Source:HGNC Symbol;Acc:HGNC:9202]                              | 854  | -0.67 | 0.0670 | -10.0 | 1.0E-23 | 9.5E-23 |
| ENSG00000204160 | ZDHHC18   | zinc finger DHHC-type palmitoyltransferase 18 [Source:HGNC Symbol;Acc:HGNC:20712]               | 1157 | -0.59 | 0.0586 | -10.0 | 1.1E-23 | 9.8E-23 |
| ENSG00000142599 | RERE      | arginine-glutamic acid dipeptide repeats [Source:HGNC Symbol;Acc:HGNC:9965]                     | 1654 | -0.57 | 0.0573 | -10.0 | 1.1E-23 | 1.0E-22 |
| ENSG00000152217 | SETBP1    | SET binding protein 1 [Source:HGNC Symbol;Acc:HGNC:15573]                                       | 415  | -0.98 | 0.0981 | -10.0 | 1.3E-23 | 1.2E-22 |
| ENSG00000214194 | SMIM30    | small integral membrane protein 30 [Source:HGNC Symbol;Acc:HGNC:48953]                          | 731  | -0.76 | 0.0757 | -10.0 | 1.4E-23 | 1.3E-22 |
| ENSG00000041353 | RAB27B    | RAB27B, member RAS oncogene family [Source:HGNC Symbol;Acc:HGNC:9767]                           | 487  | -0.88 | 0.0876 | -10.0 | 1.5E-23 | 1.3E-22 |
| ENSG00000107821 | KAZALD1   | Kazal type serine peptidase inhibitor domain 1 [Source:HGNC Symbol;Acc:HGNC:25460]              | 194  | -1.45 | 0.1446 | -10.0 | 1.5E-23 | 1.4E-22 |
| ENSG00000016082 | ISL1      | ISL LIM homeobox 1 [Source:HGNC Symbol;Acc:HGNC:6132]                                           | 55   | -3.71 | 0.3716 | -10.0 | 1.8E-23 | 1.7E-22 |
| ENSG00000040933 | INPP4A    | inositol polyphosphate-4-phosphatase type I A [Source:HGNC Symbol;Acc:HGNC:6074]                | 1270 | -0.57 | 0.0570 | -10.0 | 1.8E-23 | 1.7E-22 |
| ENSG00000014257 | ACP3      | acid phosphatase 3 [Source:HGNC Symbol;Acc:HGNC:125]                                            | 65   | -2.90 | 0.2903 | -10.0 | 1.9E-23 | 1.7E-22 |
| ENSG00000163346 | PBXIP1    | PBX homeobox interacting protein 1 [Source:HGNC Symbol;Acc:HGNC:21199]                          | 699  | -0.76 | 0.0764 | -10.0 | 1.9E-23 | 1.7E-22 |
| ENSG00000111269 | CREBL2    | cAMP responsive element binding protein like 2 [Source:HGNC Symbol;Acc:HGNC:2350]               | 856  | -0.66 | 0.0659 | -10.0 | 2.1E-23 | 1.9E-22 |
| ENSG00000106327 | TFR2      | transferrin receptor 2 [Source:HGNC Symbol;Acc:HGNC:11762]                                      | 365  | -1.02 | 0.1027 | -9.9  | 2.5E-23 | 2.3E-22 |
| ENSG00000173369 | C1QB      | complement C1q B chain [Source:HGNC Symbol;Acc:HGNC:1242]                                       | 80   | -2.44 | 0.2455 | -9.9  | 2.7E-23 | 2.5E-22 |

|                 |           |                                                                                                        |      |       |        |      |         |         |
|-----------------|-----------|--------------------------------------------------------------------------------------------------------|------|-------|--------|------|---------|---------|
| ENSG00000175155 | YPEL2     | yippee like 2 [Source:HGNC Symbol;Acc:HGNC:18326]                                                      | 123  | -1.81 | 0.1828 | -9.9 | 4.2E-23 | 3.9E-22 |
| ENSG00000240694 | PNMA2     | PNMA family member 2 [Source:HGNC Symbol;Acc:HGNC:9159]                                                | 71   | -2.57 | 0.2597 | -9.9 | 4.5E-23 | 4.1E-22 |
| ENSG00000106025 | TSPAN12   | tetraspanin 12 [Source:HGNC Symbol;Acc:HGNC:21641]                                                     | 205  | -1.46 | 0.1481 | -9.9 | 4.8E-23 | 4.4E-22 |
| ENSG00000185361 | TNFAIP8L1 | TNF alpha induced protein 8 like 1 [Source:HGNC Symbol;Acc:HGNC:28279]                                 | 163  | -1.54 | 0.1557 | -9.9 | 4.9E-23 | 4.4E-22 |
| ENSG00000101265 | RASSF2    | Ras association domain family member 2 [Source:HGNC Symbol;Acc:HGNC:9883]                              | 88   | -2.26 | 0.2291 | -9.9 | 5.1E-23 | 4.7E-22 |
| ENSG00000144868 | TMEM108   | transmembrane protein 108 [Source:HGNC Symbol;Acc:HGNC:28451]                                          | 83   | -6.58 | 0.6666 | -9.9 | 5.3E-23 | 4.8E-22 |
| ENSG00000101544 | ADNP2     | ADNP homeobox 2 [Source:HGNC Symbol;Acc:HGNC:23803]                                                    | 674  | -0.74 | 0.0749 | -9.9 | 5.9E-23 | 5.4E-22 |
| ENSG00000182158 | CREB3L2   | cAMP responsive element binding protein 3 like 2 [Source:HGNC Symbol;Acc:HGNC:23720]                   | 1164 | -0.61 | 0.0614 | -9.9 | 6.1E-23 | 5.5E-22 |
| ENSG00000180251 | SLC9A4    | solute carrier family 9 member A4 [Source:HGNC Symbol;Acc:HGNC:11077]                                  | 53   | -4.39 | 0.4455 | -9.9 | 6.2E-23 | 5.6E-22 |
| ENSG00000135299 | ANKRD6    | ankyrin repeat domain 6 [Source:HGNC Symbol;Acc:HGNC:17280]                                            | 165  | -1.48 | 0.1499 | -9.9 | 6.4E-23 | 5.8E-22 |
| ENSG00000101751 | POLI      | DNA polymerase iota [Source:HGNC Symbol;Acc:HGNC:9182]                                                 | 373  | -0.99 | 0.1002 | -9.9 | 6.8E-23 | 6.2E-22 |
| ENSG00000240280 | TCAM1P    | testicular cell adhesion molecule 1, pseudogene [Source:HGNC Symbol;Acc:HGNC:30707]                    | 101  | -2.02 | 0.2061 | -9.8 | 9.1E-23 | 8.2E-22 |
| ENSG00000154856 | APCDD1    | APC down-regulated 1 [Source:HGNC Symbol;Acc:HGNC:15718]                                               | 56   | -5.13 | 0.5220 | -9.8 | 9.3E-23 | 8.4E-22 |
| ENSG00000072832 | CRMP1     | collapsin response mediator protein 1 [Source:HGNC Symbol;Acc:HGNC:2365]                               | 232  | -1.28 | 0.1304 | -9.8 | 9.4E-23 | 8.5E-22 |
| ENSG00000227825 | SLC9A7P1  | solute carrier family 9 member 7 pseudogene 1 [Source:HGNC Symbol;Acc:HGNC:32679]                      | 253  | -1.16 | 0.1182 | -9.8 | 1.0E-22 | 9.1E-22 |
| ENSG00000178726 | THBD      | thrombomodulin [Source:HGNC Symbol;Acc:HGNC:11784]                                                     | 258  | -3.14 | 0.3203 | -9.8 | 1.2E-22 | 1.1E-21 |
| ENSG00000164080 | RAD54L2   | RAD54 like 2 [Source:HGNC Symbol;Acc:HGNC:29123]                                                       | 1047 | -0.60 | 0.0617 | -9.8 | 1.3E-22 | 1.2E-21 |
| ENSG00000077684 | JADE1     | jade family PHD finger 1 [Source:HGNC Symbol;Acc:HGNC:30027]                                           | 881  | -0.68 | 0.0697 | -9.8 | 1.4E-22 | 1.3E-21 |
| ENSG00000123095 | BHLHE41   | basic helix-loop-helix family member e41 [Source:HGNC Symbol;Acc:HGNC:16617]                           | 149  | -1.60 | 0.1638 | -9.8 | 1.4E-22 | 1.3E-21 |
| ENSG00000060140 | STYK1     | serine/threonine/tyrosine kinase 1 [Source:HGNC Symbol;Acc:HGNC:18889]                                 | 764  | -0.75 | 0.0769 | -9.8 | 1.7E-22 | 1.6E-21 |
| ENSG00000134716 | CYP2J2    | cytochrome P450 family 2 subfamily J member 2 [Source:HGNC Symbol;Acc:HGNC:2634]                       | 80   | -2.30 | 0.2362 | -9.8 | 1.8E-22 | 1.6E-21 |
| ENSG00000197217 | ENTPD4    | ectonucleoside triphosphate diphosphohydrolase 4 [Source:HGNC Symbol;Acc:HGNC:14573]                   | 997  | -0.59 | 0.0607 | -9.7 | 1.9E-22 | 1.7E-21 |
| ENSG00000116711 | PLA2G4A   | phospholipase A2 group IVA [Source:HGNC Symbol;Acc:HGNC:9035]                                          | 58   | -5.37 | 0.5512 | -9.7 | 1.9E-22 | 1.7E-21 |
| ENSG00000109458 | GAB1      | GRB2 associated binding protein 1 [Source:HGNC Symbol;Acc:HGNC:4066]                                   | 1050 | -0.63 | 0.0644 | -9.7 | 2.0E-22 | 1.8E-21 |
| ENSG00000170545 | SMAGP     | small cell adhesion glycoprotein [Source:HGNC Symbol;Acc:HGNC:26918]                                   | 524  | -0.87 | 0.0889 | -9.7 | 2.1E-22 | 1.8E-21 |
| ENSG00000119537 | KDSR      | 3-ketodihydrosphingosine reductase [Source:HGNC Symbol;Acc:HGNC:4021]                                  | 782  | -0.66 | 0.0683 | -9.7 | 2.1E-22 | 1.9E-21 |
| ENSG00000073067 | CYP2W1    | cytochrome P450 family 2 subfamily W member 1 [Source:HGNC Symbol;Acc:HGNC:20243]                      | 100  | -7.18 | 0.7371 | -9.7 | 2.1E-22 | 1.9E-21 |
| ENSG00000173890 | GPR160    | G protein-coupled receptor 160 [Source:HGNC Symbol;Acc:HGNC:23693]                                     | 85   | -2.32 | 0.2385 | -9.7 | 2.2E-22 | 2.0E-21 |
| ENSG00000107902 | LHPP      | phospholysine phosphohistidine inorganic pyrophosphate phosphatase [Source:HGNC Symbol;Acc:HGNC:10790] | 518  | -0.84 | 0.0862 | -9.7 | 2.4E-22 | 2.1E-21 |
| ENSG00000007237 | GAS7      | growth arrest specific 7 [Source:HGNC Symbol;Acc:HGNC:4169]                                            | 161  | -1.56 | 0.1604 | -9.7 | 2.4E-22 | 2.2E-21 |
| ENSG00000163900 | TMEM41A   | transmembrane protein 41A [Source:HGNC Symbol;Acc:HGNC:30544]                                          | 1006 | -0.61 | 0.0630 | -9.7 | 2.6E-22 | 2.3E-21 |
| ENSG00000174307 | PHLDA3    | pleckstrin homology like domain family A member 3 [Source:HGNC Symbol;Acc:HGNC:8934]                   | 1766 | -0.53 | 0.0546 | -9.7 | 3.1E-22 | 2.7E-21 |
| ENSG00000153246 | PLA2R1    | phospholipase A2 receptor 1 [Source:HGNC Symbol;Acc:HGNC:9042]                                         | 352  | -1.05 | 0.1083 | -9.7 | 3.1E-22 | 2.8E-21 |
| ENSG00000177570 | SAMD12    | sterile alpha motif domain containing 12 [Source:HGNC Symbol;Acc:HGNC:31750]                           | 64   | -2.77 | 0.2855 | -9.7 | 3.2E-22 | 2.9E-21 |
| ENSG00000175782 | SLC35E3   | solute carrier family 35 member E3 [Source:HGNC Symbol;Acc:HGNC:20864]                                 | 661  | -0.78 | 0.0812 | -9.6 | 5.7E-22 | 5.0E-21 |
| ENSG00000135218 | CD36      | CD36 molecule [Source:HGNC Symbol;Acc:HGNC:1663]                                                       | 55   | -3.23 | 0.3356 | -9.6 | 5.8E-22 | 5.1E-21 |
| ENSG00000151623 | NR3C2     | nuclear receptor subfamily 3 group C member 2 [Source:HGNC Symbol;Acc:HGNC:7979]                       | 49   | -4.52 | 0.4700 | -9.6 | 6.5E-22 | 5.8E-21 |
| ENSG00000134086 | VHL       | von Hippel-Lindau tumor suppressor [Source:HGNC Symbol;Acc:HGNC:12687]                                 | 799  | -0.65 | 0.0671 | -9.6 | 6.6E-22 | 5.8E-21 |
| ENSG00000214357 | NEURL1B   | neuralized E3 ubiquitin protein ligase 1B [Source:HGNC Symbol;Acc:HGNC:35422]                          | 323  | -1.06 | 0.1104 | -9.6 | 7.7E-22 | 6.8E-21 |
| ENSG00000122490 | SLC66A2   | solute carrier family 66 member 2 [Source:HGNC Symbol;Acc:HGNC:26188]                                  | 1454 | -0.56 | 0.0583 | -9.6 | 8.3E-22 | 7.3E-21 |
| ENSG00000137841 | PLCB2     | phospholipase C beta 2 [Source:HGNC Symbol;Acc:HGNC:9055]                                              | 79   | -2.36 | 0.2457 | -9.6 | 8.5E-22 | 7.4E-21 |
| ENSG00000139428 | MMAB      | metabolism of cobalamin associated B [Source:HGNC Symbol;Acc:HGNC:19331]                               | 390  | -0.96 | 0.1004 | -9.6 | 8.7E-22 | 7.6E-21 |

|                 |           |                                                                                                    |       |       |        |      |         |         |
|-----------------|-----------|----------------------------------------------------------------------------------------------------|-------|-------|--------|------|---------|---------|
| ENSG00000142973 | CYP4B1    | cytochrome P450 family 4 subfamily B member 1 [Source:HGNC Symbol;Acc:HGNC:2644]                   | 58    | -2.98 | 0.3108 | -9.6 | 9.1E-22 | 8.0E-21 |
| ENSG00000094975 | SUCO      | SUN domain containing ossification factor [Source:HGNC Symbol;Acc:HGNC:1240]                       | 1662  | -0.53 | 0.0551 | -9.6 | 9.5E-22 | 8.3E-21 |
| ENSG00000143119 | CD53      | CD53 molecule [Source:HGNC Symbol;Acc:HGNC:1686]                                                   | 70    | -2.50 | 0.2607 | -9.6 | 9.6E-22 | 8.4E-21 |
| ENSG00000167771 | RCOR2     | REST corepressor 2 [Source:HGNC Symbol;Acc:HGNC:27455]                                             | 73    | -2.46 | 0.2573 | -9.6 | 1.0E-21 | 8.7E-21 |
| ENSG00000166033 | HTRA1     | HtrA serine peptidase 1 [Source:HGNC Symbol;Acc:HGNC:9476]                                         | 149   | -1.54 | 0.1606 | -9.6 | 1.0E-21 | 8.8E-21 |
| ENSG00000143631 | FLG       | filaggrin [Source:HGNC Symbol;Acc:HGNC:3748]                                                       | 55    | -3.11 | 0.3250 | -9.6 | 1.0E-21 | 8.9E-21 |
| ENSG00000181396 | OGFOD3    | 2-oxoglutarate and iron dependent oxygenase domain containing 3 [Source:HGNC Symbol;Acc:HGNC:2660] | 1113  | -0.55 | 0.0577 | -9.6 | 1.0E-21 | 9.0E-21 |
| ENSG00000030419 | IKZF2     | IKAROS family zinc finger 2 [Source:HGNC Symbol;Acc:HGNC:13177]                                    | 319   | -1.02 | 0.1071 | -9.5 | 1.5E-21 | 1.3E-20 |
| ENSG00000157851 | DPYSL5    | dihydropyrimidinase like 5 [Source:HGNC Symbol;Acc:HGNC:20637]                                     | 117   | -1.79 | 0.1874 | -9.5 | 1.6E-21 | 1.4E-20 |
| ENSG00000106948 | AKNA      | AT-hook transcription factor [Source:HGNC Symbol;Acc:HGNC:24108]                                   | 153   | -1.52 | 0.1594 | -9.5 | 1.7E-21 | 1.5E-20 |
| ENSG00000144648 | ACKR2     | atypical chemokine receptor 2 [Source:HGNC Symbol;Acc:HGNC:1565]                                   | 48    | -4.48 | 0.4706 | -9.5 | 1.8E-21 | 1.5E-20 |
| ENSG00000003400 | CASP10    | caspase 10 [Source:HGNC Symbol;Acc:HGNC:1500]                                                      | 162   | -1.47 | 0.1544 | -9.5 | 1.9E-21 | 1.6E-20 |
| ENSG00000181449 | SOX2      | SRY-box transcription factor 2 [Source:HGNC Symbol;Acc:HGNC:11195]                                 | 152   | -3.42 | 0.3596 | -9.5 | 2.1E-21 | 1.8E-20 |
| ENSG00000113448 | PDE4D     | phosphodiesterase 4D [Source:HGNC Symbol;Acc:HGNC:8783]                                            | 259   | -1.15 | 0.1212 | -9.5 | 2.1E-21 | 1.9E-20 |
| ENSG00000171858 | RPS21     | ribosomal protein S21 [Source:HGNC Symbol;Acc:HGNC:10409]                                          | 25763 | -0.55 | 0.0585 | -9.5 | 2.6E-21 | 2.3E-20 |
| ENSG00000163823 | CCR1      | C-C motif chemokine receptor 1 [Source:HGNC Symbol;Acc:HGNC:1602]                                  | 90    | -2.10 | 0.2211 | -9.5 | 2.6E-21 | 2.3E-20 |
| ENSG00000169750 | RAC3      | Rac family small GTPase 3 [Source:HGNC Symbol;Acc:HGNC:9803]                                       | 255   | -1.15 | 0.1215 | -9.5 | 2.7E-21 | 2.3E-20 |
| ENSG00000187244 | BCAM      | basal cell adhesion molecule (Lutheran blood group) [Source:HGNC Symbol;Acc:HGNC:6722]             | 1250  | -0.53 | 0.0559 | -9.5 | 2.7E-21 | 2.4E-20 |
| ENSG00000122966 | CIT       | citron rho-interacting serine/threonine kinase [Source:HGNC Symbol;Acc:HGNC:1985]                  | 1344  | -0.55 | 0.0577 | -9.5 | 2.9E-21 | 2.5E-20 |
| ENSG00000139055 | ERP27     | endoplasmic reticulum protein 27 [Source:HGNC Symbol;Acc:HGNC:26495]                               | 465   | -0.86 | 0.0909 | -9.5 | 3.0E-21 | 2.6E-20 |
| ENSG00000204866 | IGFL2     | IGF like family member 2 [Source:HGNC Symbol;Acc:HGNC:32929]                                       | 72    | -6.36 | 0.6725 | -9.5 | 3.1E-21 | 2.7E-20 |
| ENSG00000119927 | GPAM      | glycerol-3-phosphate acyltransferase, mitochondrial [Source:HGNC Symbol;Acc:HGNC:24865]            | 795   | -0.72 | 0.0763 | -9.4 | 3.4E-21 | 2.9E-20 |
| ENSG00000189337 | KAZN      | kazrin, periplakin interacting protein [Source:HGNC Symbol;Acc:HGNC:29173]                         | 715   | -0.67 | 0.0709 | -9.4 | 3.4E-21 | 3.0E-20 |
| ENSG00000130224 | LRCH2     | leucine rich repeats and calponin homology domain containing 2 [Source:HGNC Symbol;Acc:HGNC:29295] | 88    | -6.98 | 0.7390 | -9.4 | 3.5E-21 | 3.0E-20 |
| ENSG00000215808 | LINC01139 | long intergenic non-protein coding RNA 1139 [Source:HGNC Symbol;Acc:HGNC:27924]                    | 201   | -1.33 | 0.1413 | -9.4 | 3.7E-21 | 3.2E-20 |
| ENSG00000177485 | ZBTB33    | zinc finger and BTB domain containing 33 [Source:HGNC Symbol;Acc:HGNC:16682]                       | 472   | -0.84 | 0.0888 | -9.4 | 4.8E-21 | 4.1E-20 |
| ENSG00000120063 | GNA13     | G protein subunit alpha 13 [Source:HGNC Symbol;Acc:HGNC:4381]                                      | 1351  | -0.52 | 0.0555 | -9.4 | 5.1E-21 | 4.4E-20 |
| ENSG00000197892 | KIF13B    | kinesin family member 13B [Source:HGNC Symbol;Acc:HGNC:14405]                                      | 128   | -1.67 | 0.1772 | -9.4 | 5.4E-21 | 4.6E-20 |
| ENSG00000129197 | RPAIN     | RPA interacting protein [Source:HGNC Symbol;Acc:HGNC:28641]                                        | 348   | -0.98 | 0.1047 | -9.4 | 5.8E-21 | 5.0E-20 |
| ENSG00000043514 | TRIT1     | tRNA isopentenyltransferase 1 [Source:HGNC Symbol;Acc:HGNC:20286]                                  | 564   | -0.76 | 0.0813 | -9.4 | 6.0E-21 | 5.1E-20 |
| ENSG00000102981 | PAR6A     | par-6 family cell polarity regulator alpha [Source:HGNC Symbol;Acc:HGNC:15943]                     | 137   | -1.72 | 0.1835 | -9.4 | 6.2E-21 | 5.3E-20 |
| ENSG00000132196 | HSD17B7   | hydroxysteroid 17-beta dehydrogenase 7 [Source:HGNC Symbol;Acc:HGNC:5215]                          | 262   | -1.10 | 0.1172 | -9.4 | 6.2E-21 | 5.3E-20 |
| ENSG00000172818 | OVOL1     | ovo like transcriptional repressor 1 [Source:HGNC Symbol;Acc:HGNC:8525]                            | 719   | -0.69 | 0.0733 | -9.4 | 6.8E-21 | 5.8E-20 |
| ENSG00000198807 | PAX9      | paired box 9 [Source:HGNC Symbol;Acc:HGNC:8623]                                                    | 328   | -0.99 | 0.1059 | -9.4 | 7.9E-21 | 6.7E-20 |
| ENSG00000081237 | PTPRC     | protein tyrosine phosphatase receptor type C [Source:HGNC Symbol;Acc:HGNC:9666]                    | 80    | -2.23 | 0.2388 | -9.4 | 8.6E-21 | 7.3E-20 |
| ENSG00000153574 | RPIA      | ribose 5-phosphate isomerase A [Source:HGNC Symbol;Acc:HGNC:10297]                                 | 662   | -0.72 | 0.0770 | -9.4 | 8.6E-21 | 7.3E-20 |
| ENSG00000167363 | FN3K      | fructosamine 3 kinase [Source:HGNC Symbol;Acc:HGNC:24822]                                          | 205   | -1.31 | 0.1403 | -9.3 | 9.1E-21 | 7.8E-20 |
| ENSG00000204291 | COL15A1   | collagen type XV alpha 1 chain [Source:HGNC Symbol;Acc:HGNC:2192]                                  | 75    | -2.29 | 0.2455 | -9.3 | 1.1E-20 | 9.7E-20 |
| ENSG00000035115 | SH3YL1    | SH3 and SYLF domain containing 1 [Source:HGNC Symbol;Acc:HGNC:29546]                               | 946   | -0.59 | 0.0633 | -9.3 | 1.2E-20 | 1.0E-19 |
| ENSG00000162782 | TDRD5     | tudor domain containing 5 [Source:HGNC Symbol;Acc:HGNC:20614]                                      | 55    | -5.49 | 0.5889 | -9.3 | 1.2E-20 | 1.0E-19 |
| ENSG00000105767 | CADM4     | cell adhesion molecule 4 [Source:HGNC Symbol;Acc:HGNC:30825]                                       | 340   | -0.99 | 0.1065 | -9.3 | 1.3E-20 | 1.1E-19 |
| ENSG00000168264 | IRF2BP2   | interferon regulatory factor 2 binding protein 2 [Source:HGNC Symbol;Acc:HGNC:21729]               | 535   | -0.79 | 0.0848 | -9.3 | 1.3E-20 | 1.1E-19 |

|                 |          |                                                                                                            |      |       |        |      |         |         |
|-----------------|----------|------------------------------------------------------------------------------------------------------------|------|-------|--------|------|---------|---------|
| ENSG00000228340 | MIR646HG | MIR646 host gene [Source:HGNC Symbol;Acc:HGNC:27659]                                                       | 153  | -1.66 | 0.1786 | -9.3 | 1.4E-20 | 1.2E-19 |
| ENSG00000123358 | NR4A1    | nuclear receptor subfamily 4 group A member 1 [Source:HGNC Symbol;Acc:HGNC:7980]                           | 298  | -1.05 | 0.1134 | -9.3 | 1.4E-20 | 1.2E-19 |
| ENSG00000134444 | RELCH    | RAB11 binding and LisH domain, coiled-coil and HEAT repeat containing [Source:HGNC Symbol;Acc:HGNC:111674] | 916  | -0.59 | 0.0637 | -9.3 | 1.4E-20 | 1.2E-19 |
| ENSG00000111674 | ENO2     | enolase 2 [Source:HGNC Symbol;Acc:HGNC:3353]                                                               | 383  | -0.95 | 0.1027 | -9.3 | 1.5E-20 | 1.2E-19 |
| ENSG00000087250 | MT3      | metallothionein 3 [Source:HGNC Symbol;Acc:HGNC:7408]                                                       | 82   | -2.21 | 0.2383 | -9.3 | 1.6E-20 | 1.3E-19 |
| ENSG00000146083 | RNF44    | ring finger protein 44 [Source:HGNC Symbol;Acc:HGNC:19180]                                                 | 896  | -0.59 | 0.0633 | -9.3 | 1.6E-20 | 1.3E-19 |
| ENSG00000162511 | LAPTM5   | lysosomal protein transmembrane 5 [Source:HGNC Symbol;Acc:HGNC:29612]                                      | 118  | -1.71 | 0.1844 | -9.3 | 1.9E-20 | 1.6E-19 |
| ENSG00000123472 | ATPAF1   | ATP synthase mitochondrial F1 complex assembly factor 1 [Source:HGNC Symbol;Acc:HGNC:18803]                | 609  | -0.71 | 0.0761 | -9.3 | 1.9E-20 | 1.6E-19 |
| ENSG00000189129 | PLAC9    | placenta associated 9 [Source:HGNC Symbol;Acc:HGNC:19255]                                                  | 56   | -2.96 | 0.3196 | -9.3 | 2.0E-20 | 1.6E-19 |
| ENSG00000089057 | SLC23A2  | solute carrier family 23 member 2 [Source:HGNC Symbol;Acc:HGNC:10973]                                      | 740  | -0.68 | 0.0732 | -9.2 | 2.4E-20 | 2.0E-19 |
| ENSG00000259479 | SORD2P   | sorbitol dehydrogenase 2, pseudogene [Source:HGNC Symbol;Acc:HGNC:49919]                                   | 68   | -2.41 | 0.2605 | -9.2 | 2.7E-20 | 2.2E-19 |
| ENSG00000162676 | GFI1     | growth factor independent 1 transcriptional repressor [Source:HGNC Symbol;Acc:HGNC:4237]                   | 61   | -2.60 | 0.2815 | -9.2 | 2.8E-20 | 2.3E-19 |
| ENSG00000183378 | OVCH2    | ovochymase 2 [Source:HGNC Symbol;Acc:HGNC:29970]                                                           | 50   | -3.30 | 0.3579 | -9.2 | 3.1E-20 | 2.6E-19 |
| ENSG00000164023 | SGMS2    | sphingomyelin synthase 2 [Source:HGNC Symbol;Acc:HGNC:28395]                                               | 1128 | -0.57 | 0.0623 | -9.2 | 3.2E-20 | 2.6E-19 |
| ENSG00000166275 | BORCS7   | BLOC-1 related complex subunit 7 [Source:HGNC Symbol;Acc:HGNC:23516]                                       | 210  | -1.21 | 0.1316 | -9.2 | 3.2E-20 | 2.7E-19 |
| ENSG00000134759 | ELP2     | elongator acetyltransferase complex subunit 2 [Source:HGNC Symbol;Acc:HGNC:18248]                          | 949  | -0.58 | 0.0628 | -9.2 | 3.3E-20 | 2.7E-19 |
| ENSG00000162980 | ARL5A    | ADP ribosylation factor like GTPase 5A [Source:HGNC Symbol;Acc:HGNC:696]                                   | 389  | -0.92 | 0.0998 | -9.2 | 3.4E-20 | 2.8E-19 |
| ENSG00000198026 | ZNF335   | zinc finger protein 335 [Source:HGNC Symbol;Acc:HGNC:15807]                                                | 1333 | -0.50 | 0.0545 | -9.2 | 4.1E-20 | 3.4E-19 |
| ENSG00000172466 | ZNF24    | zinc finger protein 24 [Source:HGNC Symbol;Acc:HGNC:13032]                                                 | 1444 | -0.51 | 0.0551 | -9.2 | 4.1E-20 | 3.4E-19 |
| ENSG00000143228 | NUF2     | NUF2 component of NDC80 kinetochore complex [Source:HGNC Symbol;Acc:HGNC:14621]                            | 791  | -0.62 | 0.0673 | -9.2 | 4.3E-20 | 3.6E-19 |
| ENSG00000164342 | TLR3     | toll like receptor 3 [Source:HGNC Symbol;Acc:HGNC:11849]                                                   | 262  | -1.15 | 0.1250 | -9.2 | 4.7E-20 | 3.9E-19 |
| ENSG00000198715 | GLMP     | glycosylated lysosomal membrane protein [Source:HGNC Symbol;Acc:HGNC:29436]                                | 291  | -1.04 | 0.1134 | -9.2 | 4.7E-20 | 3.9E-19 |
| ENSG00000175414 | ARL10    | ADP ribosylation factor like GTPase 10 [Source:HGNC Symbol;Acc:HGNC:22042]                                 | 94   | -1.93 | 0.2107 | -9.2 | 4.8E-20 | 4.0E-19 |
| ENSG00000074966 | TXK      | TXK tyrosine kinase [Source:HGNC Symbol;Acc:HGNC:12434]                                                    | 48   | -3.35 | 0.3658 | -9.1 | 5.7E-20 | 4.7E-19 |
| ENSG00000028137 | TNFRSF1B | TNF receptor superfamily member 1B [Source:HGNC Symbol;Acc:HGNC:11917]                                     | 205  | -1.29 | 0.1408 | -9.1 | 6.2E-20 | 5.1E-19 |
| ENSG00000013725 | CD6      | CD6 molecule [Source:HGNC Symbol;Acc:HGNC:1691]                                                            | 48   | -4.90 | 0.5362 | -9.1 | 6.6E-20 | 5.5E-19 |
| ENSG00000154330 | PGM5     | phosphoglucomutase 5 [Source:HGNC Symbol;Acc:HGNC:8908]                                                    | 46   | -4.84 | 0.5298 | -9.1 | 6.8E-20 | 5.6E-19 |
| ENSG00000112186 | CAP2     | cyclase associated actin cytoskeleton regulatory protein 2 [Source:HGNC Symbol;Acc:HGNC:20039]             | 993  | -0.58 | 0.0633 | -9.1 | 6.9E-20 | 5.7E-19 |
| ENSG00000255690 | TRIL     | TLR4 interactor with leucine rich repeats [Source:HGNC Symbol;Acc:HGNC:22200]                              | 56   | -5.73 | 0.6281 | -9.1 | 6.9E-20 | 5.7E-19 |
| ENSG00000046653 | GPM6B    | glycoprotein M6B [Source:HGNC Symbol;Acc:HGNC:4461]                                                        | 121  | -1.69 | 0.1857 | -9.1 | 7.1E-20 | 5.8E-19 |
| ENSG00000117155 | SSX2IP   | SSX family member 2 interacting protein [Source:HGNC Symbol;Acc:HGNC:16509]                                | 1137 | -0.53 | 0.0585 | -9.1 | 7.7E-20 | 6.3E-19 |
| ENSG00000180190 | TDRP     | testis development related protein [Source:HGNC Symbol;Acc:HGNC:26951]                                     | 208  | -1.24 | 0.1359 | -9.1 | 7.7E-20 | 6.4E-19 |
| ENSG00000143878 | RHOB     | ras homolog family member B [Source:HGNC Symbol;Acc:HGNC:668]                                              | 747  | -0.65 | 0.0716 | -9.1 | 8.1E-20 | 6.6E-19 |
| ENSG00000168143 | FAM83B   | family with sequence similarity 83 member B [Source:HGNC Symbol;Acc:HGNC:21357]                            | 366  | -0.93 | 0.1016 | -9.1 | 8.2E-20 | 6.7E-19 |
| ENSG00000179869 | ABCA13   | ATP binding cassette subfamily A member 13 [Source:HGNC Symbol;Acc:HGNC:14638]                             | 108  | -1.73 | 0.1905 | -9.1 | 9.0E-20 | 7.4E-19 |
| ENSG00000149328 | GLB1L2   | galactosidase beta 1 like 2 [Source:HGNC Symbol;Acc:HGNC:25129]                                            | 63   | -2.54 | 0.2788 | -9.1 | 9.1E-20 | 7.5E-19 |
| ENSG00000100473 | COCH     | cochlin [Source:HGNC Symbol;Acc:HGNC:2180]                                                                 | 70   | -2.35 | 0.2590 | -9.1 | 1.1E-19 | 8.7E-19 |
| ENSG00000130222 | GADD45G  | growth arrest and DNA damage inducible gamma [Source:HGNC Symbol;Acc:HGNC:4097]                            | 85   | -2.19 | 0.2408 | -9.1 | 1.1E-19 | 9.3E-19 |
| ENSG00000173597 | SULT1B1  | sulfotransferase family 1B member 1 [Source:HGNC Symbol;Acc:HGNC:17845]                                    | 43   | -4.46 | 0.4913 | -9.1 | 1.2E-19 | 9.9E-19 |
| ENSG00000198780 | FAM169A  | family with sequence similarity 169 member A [Source:HGNC Symbol;Acc:HGNC:29138]                           | 540  | -0.78 | 0.0859 | -9.1 | 1.3E-19 | 1.0E-18 |
| ENSG00000198825 | INPP5F   | inositol polyphosphate-5-phosphatase F [Source:HGNC Symbol;Acc:HGNC:17054]                                 | 607  | -0.77 | 0.0853 | -9.1 | 1.3E-19 | 1.0E-18 |
| ENSG00000198846 | TOX      | thymocyte selection associated high mobility group box [Source:HGNC Symbol;Acc:HGNC:18988]                 | 45   | -3.94 | 0.4344 | -9.1 | 1.3E-19 | 1.1E-18 |

|                 |           |                                                                                               |      |       |        |      |         |         |
|-----------------|-----------|-----------------------------------------------------------------------------------------------|------|-------|--------|------|---------|---------|
| ENSG00000232316 | LINC02518 | long intergenic non-protein coding RNA 2518 [Source:HGNC Symbol;Acc:HGNC:53509]               | 68   | -2.34 | 0.2589 | -9.0 | 1.5E-19 | 1.3E-18 |
| ENSG00000144119 | C1QL2     | complement C1q like 2 [Source:HGNC Symbol;Acc:HGNC:24181]                                     | 47   | -5.06 | 0.5599 | -9.0 | 1.6E-19 | 1.3E-18 |
| ENSG00000187240 | DYNC2H1   | dynein cytoplasmic 2 heavy chain 1 [Source:HGNC Symbol;Acc:HGNC:2962]                         | 421  | -0.83 | 0.0916 | -9.0 | 1.6E-19 | 1.3E-18 |
| ENSG00000105877 | DNAH11    | dynein axonemal heavy chain 11 [Source:HGNC Symbol;Acc:HGNC:2942]                             | 172  | -1.46 | 0.1620 | -9.0 | 1.7E-19 | 1.3E-18 |
| ENSG00000115956 | PLEK      | pleckstrin [Source:HGNC Symbol;Acc:HGNC:9070]                                                 | 102  | -1.96 | 0.2172 | -9.0 | 1.7E-19 | 1.3E-18 |
| ENSG00000123684 | LPGAT1    | lysophosphatidylglycerol acyltransferase 1 [Source:HGNC Symbol;Acc:HGNC:28985]                | 1123 | -0.52 | 0.0572 | -9.0 | 2.0E-19 | 1.6E-18 |
| ENSG00000134962 | KLB       | klotho beta [Source:HGNC Symbol;Acc:HGNC:15527]                                               | 51   | -3.04 | 0.3375 | -9.0 | 2.1E-19 | 1.7E-18 |
| ENSG00000133678 | TMEM254   | transmembrane protein 254 [Source:HGNC Symbol;Acc:HGNC:25804]                                 | 575  | -0.87 | 0.0973 | -9.0 | 2.7E-19 | 2.1E-18 |
| ENSG00000138744 | NAAA      | N-acylethanolamine acid amidase [Source:HGNC Symbol;Acc:HGNC:736]                             | 648  | -0.70 | 0.0784 | -9.0 | 2.7E-19 | 2.2E-18 |
| ENSG00000231764 | DLX6-AS1  | DLX6 antisense RNA 1 [Source:HGNC Symbol;Acc:HGNC:37151]                                      | 210  | -1.18 | 0.1319 | -9.0 | 2.9E-19 | 2.3E-18 |
| ENSG00000188404 | SELL      | selectin L [Source:HGNC Symbol;Acc:HGNC:10720]                                                | 45   | -3.43 | 0.3832 | -9.0 | 3.3E-19 | 2.7E-18 |
| ENSG00000148400 | NOTCH1    | notch receptor 1 [Source:HGNC Symbol;Acc:HGNC:7881]                                           | 810  | -0.63 | 0.0708 | -8.9 | 3.6E-19 | 2.9E-18 |
| ENSG00000120685 | PROSER1   | proline and serine rich 1 [Source:HGNC Symbol;Acc:HGNC:20291]                                 | 524  | -0.76 | 0.0851 | -8.9 | 3.9E-19 | 3.1E-18 |
| ENSG00000108840 | HDAC5     | histone deacetylase 5 [Source:HGNC Symbol;Acc:HGNC:14068]                                     | 642  | -0.72 | 0.0803 | -8.9 | 4.2E-19 | 3.3E-18 |
| ENSG00000154655 | L3MBTL4   | L3MBTL histone methyl-lysine binding protein 4 [Source:HGNC Symbol;Acc:HGNC:26677]            | 51   | -5.60 | 0.6280 | -8.9 | 4.7E-19 | 3.7E-18 |
| ENSG00000171522 | PTGER4    | prostaglandin E receptor 4 [Source:HGNC Symbol;Acc:HGNC:9596]                                 | 121  | -1.60 | 0.1797 | -8.9 | 5.2E-19 | 4.1E-18 |
| ENSG00000114744 | COMMD2    | COMM domain containing 2 [Source:HGNC Symbol;Acc:HGNC:24993]                                  | 1099 | -0.56 | 0.0634 | -8.9 | 5.7E-19 | 4.5E-18 |
| ENSG00000047365 | ARAP2     | ArfGAP with RhoGAP domain, ankyrin repeat and PH domain 2 [Source:HGNC Symbol;Acc:HGNC:16924] | 878  | -0.58 | 0.0646 | -8.9 | 5.7E-19 | 4.5E-18 |
| ENSG00000137078 | SIT1      | signaling threshold regulating transmembrane adaptor 1 [Source:HGNC Symbol;Acc:HGNC:17710]    | 50   | -5.59 | 0.6280 | -8.9 | 5.7E-19 | 4.5E-18 |
| ENSG00000196189 | SEMA4A    | semaphorin 4A [Source:HGNC Symbol;Acc:HGNC:10729]                                             | 70   | -2.48 | 0.2791 | -8.9 | 6.0E-19 | 4.7E-18 |
| ENSG00000143344 | RGL1      | ral guanine nucleotide dissociation stimulator like 1 [Source:HGNC Symbol;Acc:HGNC:30281]     | 176  | -1.31 | 0.1470 | -8.9 | 6.3E-19 | 5.0E-18 |
| ENSG00000161405 | IKZF3     | IKAROS family zinc finger 3 [Source:HGNC Symbol;Acc:HGNC:13178]                               | 45   | -4.98 | 0.5603 | -8.9 | 6.4E-19 | 5.0E-18 |
| ENSG00000138615 | CILP      | cartilage intermediate layer protein [Source:HGNC Symbol;Acc:HGNC:1980]                       | 68   | -6.62 | 0.7459 | -8.9 | 7.3E-19 | 5.7E-18 |
| ENSG00000003249 | DBNDD1    | dysbindin domain containing 1 [Source:HGNC Symbol;Acc:HGNC:28455]                             | 552  | -0.71 | 0.0804 | -8.9 | 7.3E-19 | 5.8E-18 |
| ENSG00000121807 | CCR2      | C-C motif chemokine receptor 2 [Source:HGNC Symbol;Acc:HGNC:1603]                             | 78   | -2.15 | 0.2421 | -8.9 | 7.4E-19 | 5.8E-18 |
| ENSG00000164051 | CCDC51    | coiled-coil domain containing 51 [Source:HGNC Symbol;Acc:HGNC:25714]                          | 1257 | -0.51 | 0.0571 | -8.9 | 7.9E-19 | 6.2E-18 |
| ENSG00000185015 | CA13      | carbonic anhydrase 13 [Source:HGNC Symbol;Acc:HGNC:14914]                                     | 42   | -3.74 | 0.4224 | -8.9 | 7.9E-19 | 6.2E-18 |
| ENSG00000159714 | ZDHHC1    | zinc finger DHHC-type containing 1 [Source:HGNC Symbol;Acc:HGNC:17916]                        | 142  | -1.47 | 0.1657 | -8.9 | 8.2E-19 | 6.4E-18 |
| ENSG00000160050 | CCDC28B   | coiled-coil domain containing 28B [Source:HGNC Symbol;Acc:HGNC:28163]                         | 69   | -2.21 | 0.2498 | -8.9 | 8.2E-19 | 6.4E-18 |
| ENSG00000178498 | DTX3      | deltex E3 ubiquitin ligase 3 [Source:HGNC Symbol;Acc:HGNC:24457]                              | 350  | -0.91 | 0.1023 | -8.9 | 8.6E-19 | 6.8E-18 |
| ENSG00000100422 | CERK      | ceramide kinase [Source:HGNC Symbol;Acc:HGNC:19256]                                           | 899  | -0.57 | 0.0640 | -8.8 | 9.0E-19 | 7.0E-18 |
| ENSG00000100105 | PATZ1     | POZ/BTB and AT hook containing zinc finger 1 [Source:HGNC Symbol;Acc:HGNC:13071]              | 1083 | -0.57 | 0.0648 | -8.8 | 9.0E-19 | 7.1E-18 |
| ENSG00000160117 | ANKLE1    | ankyrin repeat and LEM domain containing 1 [Source:HGNC Symbol;Acc:HGNC:26812]                | 53   | -2.74 | 0.3103 | -8.8 | 1.1E-18 | 8.5E-18 |
| ENSG00000125384 | PTGER2    | prostaglandin E receptor 2 [Source:HGNC Symbol;Acc:HGNC:9594]                                 | 89   | -1.88 | 0.2130 | -8.8 | 1.1E-18 | 8.8E-18 |
| ENSG00000116704 | SLC35D1   | solute carrier family 35 member D1 [Source:HGNC Symbol;Acc:HGNC:20800]                        | 662  | -0.68 | 0.0777 | -8.8 | 1.2E-18 | 9.4E-18 |
| ENSG00000233695 | GAS6-AS1  | GAS6 antisense RNA 1 [Source:HGNC Symbol;Acc:HGNC:39826]                                      | 85   | -2.06 | 0.2341 | -8.8 | 1.2E-18 | 9.6E-18 |
| ENSG00000157240 | FZD1      | frizzled class receptor 1 [Source:HGNC Symbol;Acc:HGNC:4038]                                  | 1147 | -0.58 | 0.0655 | -8.8 | 1.3E-18 | 1.0E-17 |
| ENSG00000153029 | MR1       | major histocompatibility complex, class I-related [Source:HGNC Symbol;Acc:HGNC:4975]          | 210  | -1.24 | 0.1409 | -8.8 | 1.3E-18 | 1.0E-17 |
| ENSG00000168476 | REEP4     | receptor accessory protein 4 [Source:HGNC Symbol;Acc:HGNC:26176]                              | 857  | -0.57 | 0.0649 | -8.8 | 1.3E-18 | 1.0E-17 |
| ENSG00000120029 | ARMH3     | armadillo like helical domain containing 3 [Source:HGNC Symbol;Acc:HGNC:25788]                | 873  | -0.57 | 0.0653 | -8.8 | 1.6E-18 | 1.2E-17 |
| ENSG00000129355 | CDKN2D    | cyclin dependent kinase inhibitor 2D [Source:HGNC Symbol;Acc:HGNC:1790]                       | 367  | -0.87 | 0.0995 | -8.8 | 1.7E-18 | 1.3E-17 |
| ENSG00000158869 | FCER1G    | Fc fragment of IgE receptor Ig [Source:HGNC Symbol;Acc:HGNC:3611]                             | 63   | -2.36 | 0.2694 | -8.8 | 1.7E-18 | 1.3E-17 |

|                 |          |                                                                                                    |      |       |        |      |         |         |
|-----------------|----------|----------------------------------------------------------------------------------------------------|------|-------|--------|------|---------|---------|
| ENSG00000135454 | B4GALNT1 | beta-1,4-N-acetyl-galactosaminyltransferase 1 [Source:HGNC Symbol;Acc:HGNC:4117]                   | 702  | -0.67 | 0.0761 | -8.8 | 1.7E-18 | 1.3E-17 |
| ENSG00000110429 | FBXO3    | F-box protein 3 [Source:HGNC Symbol;Acc:HGNC:13582]                                                | 937  | -0.56 | 0.0640 | -8.8 | 1.9E-18 | 1.5E-17 |
| ENSG00000171476 | HOPX     | HOP homeobox [Source:HGNC Symbol;Acc:HGNC:24961]                                                   | 43   | -3.37 | 0.3842 | -8.8 | 2.0E-18 | 1.5E-17 |
| ENSG00000079482 | OPHN1    | oligophrenin 1 [Source:HGNC Symbol;Acc:HGNC:8148]                                                  | 667  | -0.64 | 0.0734 | -8.8 | 2.1E-18 | 1.6E-17 |
| ENSG00000100365 | NCF4     | neutrophil cytosolic factor 4 [Source:HGNC Symbol;Acc:HGNC:7662]                                   | 146  | -1.44 | 0.1644 | -8.7 | 2.1E-18 | 1.7E-17 |
| ENSG00000120318 | ARAP3    | ArfGAP with RhoGAP domain, ankyrin repeat and PH domain 3 [Source:HGNC Symbol;Acc:HGNC:24097]      | 133  | -1.50 | 0.1713 | -8.7 | 2.2E-18 | 1.7E-17 |
| ENSG00000179163 | FUCA1    | alpha-L-fucosidase 1 [Source:HGNC Symbol;Acc:HGNC:4006]                                            | 455  | -0.83 | 0.0944 | -8.7 | 2.4E-18 | 1.8E-17 |
| ENSG00000129422 | MTUS1    | microtubule associated scaffold protein 1 [Source:HGNC Symbol;Acc:HGNC:29789]                      | 363  | -0.89 | 0.1023 | -8.7 | 2.5E-18 | 1.9E-17 |
| ENSG00000165097 | KDM1B    | lysine demethylase 1B [Source:HGNC Symbol;Acc:HGNC:21577]                                          | 999  | -0.55 | 0.0630 | -8.7 | 2.5E-18 | 1.9E-17 |
| ENSG00000204304 | PBX2     | PBX homeobox 2 [Source:HGNC Symbol;Acc:HGNC:8633]                                                  | 1037 | -0.54 | 0.0619 | -8.7 | 2.8E-18 | 2.2E-17 |
| ENSG00000128923 | MINDY2   | MINDY lysine 48 deubiquitinase 2 [Source:HGNC Symbol;Acc:HGNC:26954]                               | 1275 | -0.54 | 0.0614 | -8.7 | 2.9E-18 | 2.3E-17 |
| ENSG00000177842 | ZNF620   | zinc finger protein 620 [Source:HGNC Symbol;Acc:HGNC:28742]                                        | 93   | -1.88 | 0.2155 | -8.7 | 3.0E-18 | 2.3E-17 |
| ENSG00000240891 | PLCXD2   | phosphatidylinositol specific phospholipase C X domain containing 2 [Source:HGNC Symbol;Acc:HGNC:2 | 119  | -1.61 | 0.1854 | -8.7 | 3.1E-18 | 2.4E-17 |
| ENSG00000165092 | ALDH1A1  | aldehyde dehydrogenase 1 family member A1 [Source:HGNC Symbol;Acc:HGNC:402]                        | 45   | -3.16 | 0.3625 | -8.7 | 3.1E-18 | 2.4E-17 |
| ENSG00000189127 | ANKRD34B | ankyrin repeat domain 34B [Source:HGNC Symbol;Acc:HGNC:33736]                                      | 148  | -1.37 | 0.1572 | -8.7 | 3.2E-18 | 2.4E-17 |
| ENSG00000100604 | CHGA     | chromogranin A [Source:HGNC Symbol;Acc:HGNC:1929]                                                  | 109  | -1.63 | 0.1879 | -8.7 | 3.4E-18 | 2.6E-17 |
| ENSG00000164758 | MED30    | mediator complex subunit 30 [Source:HGNC Symbol;Acc:HGNC:23032]                                    | 471  | -0.76 | 0.0876 | -8.7 | 3.6E-18 | 2.7E-17 |
| ENSG00000142677 | IL22RA1  | interleukin 22 receptor subunit alpha 1 [Source:HGNC Symbol;Acc:HGNC:13700]                        | 166  | -1.34 | 0.1546 | -8.7 | 3.6E-18 | 2.8E-17 |
| ENSG00000169752 | NRG4     | neuregulin 4 [Source:HGNC Symbol;Acc:HGNC:29862]                                                   | 44   | -3.26 | 0.3758 | -8.7 | 3.7E-18 | 2.9E-17 |
| ENSG00000211455 | STK38L   | serine/threonine kinase 38 like [Source:HGNC Symbol;Acc:HGNC:17848]                                | 780  | -0.60 | 0.0686 | -8.7 | 3.9E-18 | 3.0E-17 |
| ENSG00000171843 | MLLT3    | MLLT3 super elongation complex subunit [Source:HGNC Symbol;Acc:HGNC:7136]                          | 344  | -0.90 | 0.1041 | -8.7 | 4.4E-18 | 3.4E-17 |
| ENSG00000118785 | SPP1     | secreted phosphoprotein 1 [Source:HGNC Symbol;Acc:HGNC:11255]                                      | 704  | -2.40 | 0.2766 | -8.7 | 4.6E-18 | 3.5E-17 |
| ENSG00000006377 | DLX6     | distal-less homeobox 6 [Source:HGNC Symbol;Acc:HGNC:2919]                                          | 214  | -1.18 | 0.1362 | -8.7 | 4.8E-18 | 3.7E-17 |
| ENSG00000101190 | TCFL5    | transcription factor like 5 [Source:HGNC Symbol;Acc:HGNC:11646]                                    | 664  | -0.66 | 0.0767 | -8.6 | 5.2E-18 | 4.0E-17 |
| ENSG00000179023 | KLHDC7A  | kelch domain containing 7A [Source:HGNC Symbol;Acc:HGNC:26791]                                     | 122  | -1.56 | 0.1801 | -8.6 | 5.3E-18 | 4.0E-17 |
| ENSG00000161513 | FDXR     | ferredoxin reductase [Source:HGNC Symbol;Acc:HGNC:3642]                                            | 444  | -0.77 | 0.0894 | -8.6 | 5.7E-18 | 4.3E-17 |
| ENSG00000068137 | PLEKHH3  | pleckstrin homology, MyTH4 and FERM domain containing H3 [Source:HGNC Symbol;Acc:HGNC:26105]       | 974  | -0.56 | 0.0654 | -8.6 | 6.2E-18 | 4.7E-17 |
| ENSG00000124160 | NCOA5    | nuclear receptor coactivator 5 [Source:HGNC Symbol;Acc:HGNC:15909]                                 | 1346 | -0.51 | 0.0586 | -8.6 | 7.0E-18 | 5.3E-17 |
| ENSG00000133935 | ERG28    | ergosterol biosynthesis 28 homolog [Source:HGNC Symbol;Acc:HGNC:1187]                              | 1500 | -0.52 | 0.0605 | -8.6 | 7.3E-18 | 5.5E-17 |
| ENSG00000148459 | PDSS1    | decaprenyl diphosphate synthase subunit 1 [Source:HGNC Symbol;Acc:HGNC:17759]                      | 341  | -0.88 | 0.1020 | -8.6 | 7.6E-18 | 5.7E-17 |
| ENSG00000181045 | SLC26A11 | solute carrier family 26 member 11 [Source:HGNC Symbol;Acc:HGNC:14471]                             | 497  | -0.77 | 0.0890 | -8.6 | 7.8E-18 | 5.9E-17 |
| ENSG00000107984 | DKK1     | dickkopf WNT signaling pathway inhibitor 1 [Source:HGNC Symbol;Acc:HGNC:2891]                      | 488  | -0.75 | 0.0870 | -8.6 | 8.4E-18 | 6.3E-17 |
| ENSG00000101197 | BIRC7    | baculoviral IAP repeat containing 7 [Source:HGNC Symbol;Acc:HGNC:13702]                            | 48   | -3.08 | 0.3589 | -8.6 | 8.9E-18 | 6.7E-17 |
| ENSG00000085563 | ABCB1    | ATP binding cassette subfamily B member 1 [Source:HGNC Symbol;Acc:HGNC:40]                         | 48   | -3.02 | 0.3516 | -8.6 | 9.0E-18 | 6.7E-17 |
| ENSG00000178814 | OPLAH    | 5-oxoprolinase, ATP-hydrolysing [Source:HGNC Symbol;Acc:HGNC:8149]                                 | 626  | -0.66 | 0.0772 | -8.6 | 9.1E-18 | 6.8E-17 |
| ENSG00000119397 | CNTRL    | centriolin [Source:HGNC Symbol;Acc:HGNC:1858]                                                      | 421  | -0.79 | 0.0922 | -8.6 | 9.6E-18 | 7.2E-17 |
| ENSG00000156959 | LHFPL4   | LHFPL tetraspan subfamily member 4 [Source:HGNC Symbol;Acc:HGNC:29568]                             | 159  | -5.89 | 0.6868 | -8.6 | 1.0E-17 | 7.5E-17 |
| ENSG00000106415 | GLCCI1   | glucocorticoid induced 1 [Source:HGNC Symbol;Acc:HGNC:18713]                                       | 477  | -0.74 | 0.0865 | -8.6 | 1.0E-17 | 7.5E-17 |
| ENSG00000170854 | RIOX2    | ribosomal oxygenase 2 [Source:HGNC Symbol;Acc:HGNC:19441]                                          | 1152 | -0.52 | 0.0605 | -8.6 | 1.0E-17 | 7.8E-17 |
| ENSG00000130700 | GATA5    | GATA binding protein 5 [Source:HGNC Symbol;Acc:HGNC:15802]                                         | 84   | -1.88 | 0.2190 | -8.6 | 1.0E-17 | 7.8E-17 |
| ENSG00000172403 | SYNPO2   | synaptopodin 2 [Source:HGNC Symbol;Acc:HGNC:17732]                                                 | 157  | -1.39 | 0.1618 | -8.6 | 1.0E-17 | 7.8E-17 |
| ENSG00000054983 | GALC     | galactosylceramidase [Source:HGNC Symbol;Acc:HGNC:4115]                                            | 862  | -0.57 | 0.0664 | -8.6 | 1.2E-17 | 9.0E-17 |

|                 |                 |                                                                                                          |      |       |        |      |         |         |
|-----------------|-----------------|----------------------------------------------------------------------------------------------------------|------|-------|--------|------|---------|---------|
| ENSG00000082146 | STRADB          | STE20 related adaptor beta [Source:HGNC Symbol;Acc:HGNC:13205]                                           | 312  | -0.95 | 0.1112 | -8.5 | 1.2E-17 | 9.3E-17 |
| ENSG00000181790 | ADGRB1          | adhesion G protein-coupled receptor B1 [Source:HGNC Symbol;Acc:HGNC:943]                                 | 80   | -2.22 | 0.2596 | -8.5 | 1.3E-17 | 9.4E-17 |
| ENSG00000148120 | AOPEP           | aminopeptidase O (putative) [Source:HGNC Symbol;Acc:HGNC:1361]                                           | 1089 | -0.54 | 0.0628 | -8.5 | 1.4E-17 | 1.0E-16 |
| ENSG00000186517 | ARHGAP30        | Rho GTPase activating protein 30 [Source:HGNC Symbol;Acc:HGNC:27414]                                     | 113  | -1.75 | 0.2058 | -8.5 | 1.8E-17 | 1.4E-16 |
| ENSG00000183734 | ASCL2           | achaete-scute family bHLH transcription factor 2 [Source:HGNC Symbol;Acc:HGNC:739]                       | 86   | -1.83 | 0.2153 | -8.5 | 2.1E-17 | 1.6E-16 |
| ENSG00000119979 | DENND10         | DENN domain containing 10 [Source:HGNC Symbol;Acc:HGNC:31793]                                            | 813  | -0.57 | 0.0676 | -8.5 | 2.3E-17 | 1.7E-16 |
| ENSG00000165209 | STRBP           | spermatid perinuclear RNA binding protein [Source:HGNC Symbol;Acc:HGNC:16462]                            | 946  | -0.53 | 0.0628 | -8.5 | 2.4E-17 | 1.7E-16 |
| ENSG00000145335 | SNCA            | synuclein alpha [Source:HGNC Symbol;Acc:HGNC:11138]                                                      | 38   | -4.24 | 0.5008 | -8.5 | 2.5E-17 | 1.8E-16 |
| ENSG00000057704 | TMCC3           | transmembrane and coiled-coil domain family 3 [Source:HGNC Symbol;Acc:HGNC:29199]                        | 593  | -0.66 | 0.0776 | -8.5 | 2.5E-17 | 1.9E-16 |
| ENSG00000155760 | FZD7            | frizzled class receptor 7 [Source:HGNC Symbol;Acc:HGNC:4045]                                             | 527  | -0.75 | 0.0885 | -8.5 | 2.5E-17 | 1.9E-16 |
| ENSG00000226067 | LINC00623       | long intergenic non-protein coding RNA 623 [Source:HGNC Symbol;Acc:HGNC:44252]                           | 53   | -2.55 | 0.3010 | -8.5 | 2.6E-17 | 1.9E-16 |
| ENSG00000129675 | ARHGEF6         | Rac/Cdc42 guanine nucleotide exchange factor 6 [Source:HGNC Symbol;Acc:HGNC:685]                         | 75   | -2.08 | 0.2463 | -8.5 | 2.6E-17 | 1.9E-16 |
| ENSG00000138395 | CDK15           | cyclin dependent kinase 15 [Source:HGNC Symbol;Acc:HGNC:14434]                                           | 51   | -2.69 | 0.3183 | -8.5 | 2.7E-17 | 1.9E-16 |
| ENSG00000103490 | PYCARD          | PYD and CARD domain containing [Source:HGNC Symbol;Acc:HGNC:16608]                                       | 163  | -1.31 | 0.1548 | -8.5 | 2.7E-17 | 2.0E-16 |
| ENSG00000230091 | TMEM254-A       | TMEM254 antisense RNA 1 [Source:HGNC Symbol;Acc:HGNC:27340]                                              | 118  | -1.50 | 0.1778 | -8.5 | 2.7E-17 | 2.0E-16 |
| ENSG00000006555 | TTC22           | tetratricopeptide repeat domain 22 [Source:HGNC Symbol;Acc:HGNC:26067]                                   | 421  | -0.79 | 0.0934 | -8.5 | 2.7E-17 | 2.0E-16 |
| ENSG00000167528 | ZNF641          | zinc finger protein 641 [Source:HGNC Symbol;Acc:HGNC:31834]                                              | 442  | -0.75 | 0.0883 | -8.5 | 2.8E-17 | 2.0E-16 |
| ENSG00000230445 | LRRC37A6P       | leucine rich repeat containing 37 member A6, pseudogene [Source:HGNC Symbol;Acc:HGNC:33746]              | 54   | -2.59 | 0.3065 | -8.5 | 2.8E-17 | 2.1E-16 |
| ENSG00000169255 | B3GALNT1        | beta-1,3-N-acetylgalactosaminyltransferase 1 (globoside blood group) [Source:HGNC Symbol;Acc:HGNC:10902] | 391  | -0.83 | 0.0987 | -8.5 | 2.8E-17 | 2.1E-16 |
| ENSG00000155926 | SLA             | Src like adaptor [Source:HGNC Symbol;Acc:HGNC:10902]                                                     | 87   | -2.07 | 0.2448 | -8.5 | 2.9E-17 | 2.1E-16 |
| ENSG00000140451 | PIF1            | PIF1 5'-to-3' DNA helicase [Source:HGNC Symbol;Acc:HGNC:26220]                                           | 324  | -0.90 | 0.1067 | -8.4 | 2.9E-17 | 2.1E-16 |
| ENSG00000143409 | MINDY1          | MINDY lysine 48 deubiquitinase 1 [Source:HGNC Symbol;Acc:HGNC:25648]                                     | 315  | -0.94 | 0.1118 | -8.4 | 2.9E-17 | 2.1E-16 |
| ENSG00000250256 | ENSG00000250256 | novel transcript                                                                                         | 76   | -7.19 | 0.8520 | -8.4 | 3.1E-17 | 2.3E-16 |
| ENSG00000203747 | FCGR3A          | Fc fragment of IgG receptor IIIa [Source:HGNC Symbol;Acc:HGNC:3619]                                      | 54   | -2.77 | 0.3289 | -8.4 | 3.5E-17 | 2.5E-16 |
| ENSG00000139329 | LUM             | lumican [Source:HGNC Symbol;Acc:HGNC:6724]                                                               | 56   | -6.34 | 0.7531 | -8.4 | 3.6E-17 | 2.6E-16 |
| ENSG00000169031 | COL4A3          | collagen type IV alpha 3 chain [Source:HGNC Symbol;Acc:HGNC:2204]                                        | 50   | -2.73 | 0.3237 | -8.4 | 3.6E-17 | 2.6E-16 |
| ENSG00000141527 | CARD14          | caspase recruitment domain family member 14 [Source:HGNC Symbol;Acc:HGNC:16446]                          | 169  | -1.22 | 0.1449 | -8.4 | 3.8E-17 | 2.8E-16 |
| ENSG00000123843 | C4BPB           | complement component 4 binding protein beta [Source:HGNC Symbol;Acc:HGNC:1328]                           | 47   | -2.96 | 0.3513 | -8.4 | 3.8E-17 | 2.8E-16 |
| ENSG00000205744 | DENND1C         | DENN domain containing 1C [Source:HGNC Symbol;Acc:HGNC:26225]                                            | 128  | -1.50 | 0.1788 | -8.4 | 3.9E-17 | 2.8E-16 |
| ENSG00000176444 | CLK2            | CDC like kinase 2 [Source:HGNC Symbol;Acc:HGNC:2069]                                                     | 520  | -0.70 | 0.0838 | -8.4 | 5.6E-17 | 4.0E-16 |
| ENSG00000109205 | ODAM            | odontogenic, ameloblast associated [Source:HGNC Symbol;Acc:HGNC:26043]                                   | 38   | -4.72 | 0.5657 | -8.4 | 6.7E-17 | 4.8E-16 |
| ENSG00000180011 | ZADH2           | zinc binding alcohol dehydrogenase domain containing 2 [Source:HGNC Symbol;Acc:HGNC:28697]               | 444  | -0.76 | 0.0905 | -8.4 | 6.8E-17 | 4.9E-16 |
| ENSG00000123338 | NCKAP1L         | NCK associated protein 1 like [Source:HGNC Symbol;Acc:HGNC:4862]                                         | 70   | -2.22 | 0.2664 | -8.3 | 7.3E-17 | 5.3E-16 |
| ENSG00000102221 | JADE3           | jade family PHD finger 3 [Source:HGNC Symbol;Acc:HGNC:22982]                                             | 598  | -0.64 | 0.0762 | -8.3 | 7.6E-17 | 5.5E-16 |
| ENSG00000157514 | TSC22D3         | TSC22 domain family member 3 [Source:HGNC Symbol;Acc:HGNC:3051]                                          | 407  | -0.82 | 0.0983 | -8.3 | 8.9E-17 | 6.4E-16 |
| ENSG00000166169 | POLL            | DNA polymerase lambda [Source:HGNC Symbol;Acc:HGNC:9184]                                                 | 438  | -0.74 | 0.0893 | -8.3 | 1.0E-16 | 7.1E-16 |
| ENSG00000174684 | B4GAT1          | beta-1,4-glucuronyltransferase 1 [Source:HGNC Symbol;Acc:HGNC:15685]                                     | 528  | -0.73 | 0.0881 | -8.3 | 1.0E-16 | 7.2E-16 |
| ENSG00000139508 | SLC46A3         | solute carrier family 46 member 3 [Source:HGNC Symbol;Acc:HGNC:27501]                                    | 64   | -2.28 | 0.2742 | -8.3 | 1.0E-16 | 7.2E-16 |
| ENSG00000065060 | UHRF1BP1        | UHRF1 binding protein 1 [Source:HGNC Symbol;Acc:HGNC:21216]                                              | 912  | -0.62 | 0.0748 | -8.3 | 1.1E-16 | 7.5E-16 |
| ENSG00000173898 | SPTBN2          | spectrin beta, non-erythrocytic 2 [Source:HGNC Symbol;Acc:HGNC:11276]                                    | 1131 | -0.52 | 0.0630 | -8.3 | 1.1E-16 | 7.8E-16 |
| ENSG00000084676 | NCOA1           | nuclear receptor coactivator 1 [Source:HGNC Symbol;Acc:HGNC:7668]                                        | 978  | -0.53 | 0.0638 | -8.3 | 1.1E-16 | 8.1E-16 |
| ENSG00000165138 | ANKS6           | ankyrin repeat and sterile alpha motif domain containing 6 [Source:HGNC Symbol;Acc:HGNC:26724]           | 1151 | -0.50 | 0.0605 | -8.3 | 1.2E-16 | 8.5E-16 |



|                 |            |                                                                                                   |      |       |        |      |         |         |
|-----------------|------------|---------------------------------------------------------------------------------------------------|------|-------|--------|------|---------|---------|
| ENSG00000107968 | MAP3K8     | mitogen-activated protein kinase kinase kinase 8 [Source:HGNC Symbol;Acc:HGNC:6860]               | 479  | -0.71 | 0.0858 | -8.3 | 1.5E-16 | 1.0E-15 |
| ENSG00000164309 | CMYA5      | cardiomyopathy associated 5 [Source:HGNC Symbol;Acc:HGNC:14305]                                   | 96   | -1.73 | 0.2091 | -8.3 | 1.5E-16 | 1.1E-15 |
| ENSG00000167895 | TMC8       | transmembrane channel like 8 [Source:HGNC Symbol;Acc:HGNC:20474]                                  | 84   | -1.83 | 0.2223 | -8.3 | 1.5E-16 | 1.1E-15 |
| ENSG00000076826 | CAMSAP3    | calmodulin regulated spectrin associated protein family member 3 [Source:HGNC Symbol;Acc:HGNC:29] | 461  | -0.77 | 0.0928 | -8.3 | 1.5E-16 | 1.1E-15 |
| ENSG00000151690 | MFSD6      | major facilitator superfamily domain containing 6 [Source:HGNC Symbol;Acc:HGNC:24711]             | 707  | -0.61 | 0.0734 | -8.2 | 1.6E-16 | 1.2E-15 |
| ENSG00000172932 | ANKRD13D   | ankyrin repeat domain 13D [Source:HGNC Symbol;Acc:HGNC:27880]                                     | 576  | -0.69 | 0.0832 | -8.2 | 1.7E-16 | 1.2E-15 |
| ENSG00000143816 | WNT9A      | Wnt family member 9A [Source:HGNC Symbol;Acc:HGNC:12778]                                          | 1421 | -0.51 | 0.0614 | -8.2 | 1.8E-16 | 1.3E-15 |
| ENSG00000164604 | GPR85      | G protein-coupled receptor 85 [Source:HGNC Symbol;Acc:HGNC:4536]                                  | 40   | -5.25 | 0.6377 | -8.2 | 1.9E-16 | 1.4E-15 |
| ENSG00000196739 | COL27A1    | collagen type XXVII alpha 1 chain [Source:HGNC Symbol;Acc:HGNC:22986]                             | 54   | -2.46 | 0.2986 | -8.2 | 1.9E-16 | 1.4E-15 |
| ENSG00000163251 | FZD5       | frizzled class receptor 5 [Source:HGNC Symbol;Acc:HGNC:4043]                                      | 331  | -0.93 | 0.1131 | -8.2 | 1.9E-16 | 1.4E-15 |
| ENSG00000118729 | CASQ2      | calsequestrin 2 [Source:HGNC Symbol;Acc:HGNC:1513]                                                | 94   | -1.78 | 0.2168 | -8.2 | 2.0E-16 | 1.4E-15 |
| ENSG00000214796 | TUBA5P     | tubulin alpha 5, pseudogene [Source:HGNC Symbol;Acc:HGNC:54799]                                   | 224  | -1.17 | 0.1423 | -8.2 | 2.3E-16 | 1.6E-15 |
| ENSG00000108691 | CCL2       | C-C motif chemokine ligand 2 [Source:HGNC Symbol;Acc:HGNC:10618]                                  | 111  | -1.62 | 0.1977 | -8.2 | 2.3E-16 | 1.7E-15 |
| ENSG00000172031 | EPHX4      | epoxide hydrolase 4 [Source:HGNC Symbol;Acc:HGNC:23758]                                           | 62   | -2.25 | 0.2740 | -8.2 | 2.5E-16 | 1.7E-15 |
| ENSG00000168280 | KIF5C      | kinesin family member 5C [Source:HGNC Symbol;Acc:HGNC:6325]                                       | 93   | -1.68 | 0.2046 | -8.2 | 2.6E-16 | 1.8E-15 |
| ENSG00000170293 | CMTM8      | CKLF like MARVEL transmembrane domain containing 8 [Source:HGNC Symbol;Acc:HGNC:19179]            | 78   | -1.91 | 0.2336 | -8.2 | 2.6E-16 | 1.8E-15 |
| ENSG00000132510 | KDM6B      | lysine demethylase 6B [Source:HGNC Symbol;Acc:HGNC:29012]                                         | 619  | -0.66 | 0.0812 | -8.2 | 2.7E-16 | 1.9E-15 |
| ENSG00000203721 | LINC00862  | long intergenic non-protein coding RNA 862 [Source:HGNC Symbol;Acc:HGNC:21901]                    | 67   | -2.23 | 0.2724 | -8.2 | 2.9E-16 | 2.0E-15 |
| ENSG00000104880 | ARHGEF18   | Rho/Rac guanine nucleotide exchange factor 18 [Source:HGNC Symbol;Acc:HGNC:17090]                 | 510  | -0.73 | 0.0890 | -8.2 | 3.0E-16 | 2.1E-15 |
| ENSG00000176624 | MEX3C      | mex-3 RNA binding family member C [Source:HGNC Symbol;Acc:HGNC:28040]                             | 897  | -0.53 | 0.0644 | -8.2 | 3.1E-16 | 2.1E-15 |
| ENSG00000139354 | GAS2L3     | growth arrest specific 2 like 3 [Source:HGNC Symbol;Acc:HGNC:27475]                               | 423  | -0.78 | 0.0953 | -8.2 | 3.1E-16 | 2.1E-15 |
| ENSG00000091129 | NRCAM      | neuronal cell adhesion molecule [Source:HGNC Symbol;Acc:HGNC:7994]                                | 93   | -1.99 | 0.2433 | -8.2 | 3.3E-16 | 2.3E-15 |
| ENSG00000121964 | GTDC1      | glycosyltransferase like domain containing 1 [Source:HGNC Symbol;Acc:HGNC:20887]                  | 409  | -0.76 | 0.0933 | -8.1 | 3.7E-16 | 2.6E-15 |
| ENSG00000132854 | KANK4      | KN motif and ankyrin repeat domains 4 [Source:HGNC Symbol;Acc:HGNC:27263]                         | 985  | -0.55 | 0.0672 | -8.1 | 4.0E-16 | 2.8E-15 |
| ENSG00000100100 | PIK3IP1    | phosphoinositide-3-kinase interacting protein 1 [Source:HGNC Symbol;Acc:HGNC:24942]               | 79   | -1.82 | 0.2232 | -8.1 | 4.0E-16 | 2.8E-15 |
| ENSG00000182487 | NCF1B      | neutrophil cytosolic factor 1B pseudogene [Source:HGNC Symbol;Acc:HGNC:32522]                     | 61   | -2.28 | 0.2800 | -8.1 | 4.2E-16 | 2.9E-15 |
| ENSG00000114770 | ABCC5      | ATP binding cassette subfamily C member 5 [Source:HGNC Symbol;Acc:HGNC:56]                        | 592  | -0.69 | 0.0854 | -8.1 | 4.5E-16 | 3.1E-15 |
| ENSG00000138028 | CGREF1     | cell growth regulator with EF-hand domain 1 [Source:HGNC Symbol;Acc:HGNC:16962]                   | 67   | -2.04 | 0.2510 | -8.1 | 5.1E-16 | 3.5E-15 |
| ENSG00000164692 | COL1A2     | collagen type I alpha 2 chain [Source:HGNC Symbol;Acc:HGNC:2198]                                  | 106  | -1.86 | 0.2296 | -8.1 | 5.5E-16 | 3.8E-15 |
| ENSG00000163960 | UBXN7      | UBX domain protein 7 [Source:HGNC Symbol;Acc:HGNC:29119]                                          | 880  | -0.53 | 0.0652 | -8.1 | 5.6E-16 | 3.8E-15 |
| ENSG00000078699 | CBFA2T2    | CBFA2/RUNX1 partner transcriptional co-repressor 2 [Source:HGNC Symbol;Acc:HGNC:1536]             | 862  | -0.54 | 0.0663 | -8.1 | 5.7E-16 | 3.9E-15 |
| ENSG0000010610  | CD4        | CD4 molecule [Source:HGNC Symbol;Acc:HGNC:1678]                                                   | 73   | -1.98 | 0.2446 | -8.1 | 5.7E-16 | 4.0E-15 |
| ENSG00000104081 | BMF        | Bcl2 modifying factor [Source:HGNC Symbol;Acc:HGNC:24132]                                         | 464  | -0.78 | 0.0970 | -8.1 | 5.8E-16 | 4.0E-15 |
| ENSG00000109956 | B3GAT1     | beta-1,3-glucuronyltransferase 1 [Source:HGNC Symbol;Acc:HGNC:921]                                | 47   | -2.63 | 0.3245 | -8.1 | 6.0E-16 | 4.1E-15 |
| ENSG00000243069 | ARHGEF26-A | ARHGEF26 antisense RNA 1 [Source:HGNC Symbol;Acc:HGNC:41048]                                      | 36   | -3.45 | 0.4266 | -8.1 | 6.1E-16 | 4.2E-15 |
| ENSG00000078142 | PIK3C3     | phosphatidylinositol 3-kinase catalytic subunit type 3 [Source:HGNC Symbol;Acc:HGNC:8974]         | 504  | -0.70 | 0.0866 | -8.1 | 6.3E-16 | 4.3E-15 |
| ENSG00000071243 | ING3       | inhibitor of growth family member 3 [Source:HGNC Symbol;Acc:HGNC:14587]                           | 453  | -0.71 | 0.0882 | -8.1 | 7.4E-16 | 5.1E-15 |
| ENSG00000144847 | IGSF11     | immunoglobulin superfamily member 11 [Source:HGNC Symbol;Acc:HGNC:16669]                          | 73   | -1.91 | 0.2365 | -8.1 | 7.4E-16 | 5.1E-15 |
| ENSG00000161395 | PGAP3      | post-GPI attachment to proteins phospholipase 3 [Source:HGNC Symbol;Acc:HGNC:23719]               | 433  | -0.72 | 0.0893 | -8.1 | 7.6E-16 | 5.2E-15 |
| ENSG00000196542 | SPTSSB     | serine palmitoyltransferase small subunit B [Source:HGNC Symbol;Acc:HGNC:24045]                   | 48   | -6.10 | 0.7567 | -8.1 | 7.6E-16 | 5.2E-15 |
| ENSG00000096006 | CRISP3     | cysteine rich secretory protein 3 [Source:HGNC Symbol;Acc:HGNC:16904]                             | 47   | -6.08 | 0.7548 | -8.1 | 7.7E-16 | 5.2E-15 |
| ENSG00000141579 | ZNF750     | zinc finger protein 750 [Source:HGNC Symbol;Acc:HGNC:25843]                                       | 62   | -6.89 | 0.8549 | -8.1 | 8.0E-16 | 5.5E-15 |

|                 |                 |                                                                                                |      |       |        |      |         |         |
|-----------------|-----------------|------------------------------------------------------------------------------------------------|------|-------|--------|------|---------|---------|
| ENSG00000089820 | ARHGAP4         | Rho GTPase activating protein 4 [Source:HGNC Symbol;Acc:HGNC:674]                              | 95   | -1.61 | 0.2003 | -8.0 | 8.4E-16 | 5.8E-15 |
| ENSG00000006747 | SCIN            | scinderin [Source:HGNC Symbol;Acc:HGNC:21695]                                                  | 125  | -1.47 | 0.1822 | -8.0 | 8.7E-16 | 5.9E-15 |
| ENSG00000011465 | DCN             | decorin [Source:HGNC Symbol;Acc:HGNC:2705]                                                     | 40   | -3.26 | 0.4054 | -8.0 | 9.2E-16 | 6.3E-15 |
| ENSG00000169860 | P2RY1           | purinergic receptor P2Y1 [Source:HGNC Symbol;Acc:HGNC:8539]                                    | 38   | -3.17 | 0.3943 | -8.0 | 9.5E-16 | 6.5E-15 |
| ENSG00000163257 | DCAF16          | DDB1 and CUL4 associated factor 16 [Source:HGNC Symbol;Acc:HGNC:25987]                         | 1033 | -0.52 | 0.0649 | -8.0 | 9.7E-16 | 6.6E-15 |
| ENSG00000080839 | RBL1            | RB transcriptional corepressor like 1 [Source:HGNC Symbol;Acc:HGNC:9893]                       | 992  | -0.51 | 0.0641 | -8.0 | 1.0E-15 | 6.8E-15 |
| ENSG00000090104 | RGS1            | regulator of G protein signaling 1 [Source:HGNC Symbol;Acc:HGNC:9991]                          | 62   | -2.39 | 0.2978 | -8.0 | 1.0E-15 | 6.9E-15 |
| ENSG00000177000 | MTHFR           | methylenetetrahydrofolate reductase [Source:HGNC Symbol;Acc:HGNC:7436]                         | 684  | -0.59 | 0.0733 | -8.0 | 1.1E-15 | 7.7E-15 |
| ENSG00000137411 | VARS2           | valyl-tRNA synthetase 2, mitochondrial [Source:HGNC Symbol;Acc:HGNC:21642]                     | 927  | -0.56 | 0.0694 | -8.0 | 1.1E-15 | 7.8E-15 |
| ENSG00000162869 | PPP1R21         | protein phosphatase 1 regulatory subunit 21 [Source:HGNC Symbol;Acc:HGNC:30595]                | 402  | -0.74 | 0.0922 | -8.0 | 1.3E-15 | 8.9E-15 |
| ENSG00000173705 | SUSD5           | sushi domain containing 5 [Source:HGNC Symbol;Acc:HGNC:29061]                                  | 563  | -0.65 | 0.0810 | -8.0 | 1.3E-15 | 8.9E-15 |
| ENSG00000056998 | GYG2            | glycogenin 2 [Source:HGNC Symbol;Acc:HGNC:4700]                                                | 52   | -2.39 | 0.2990 | -8.0 | 1.4E-15 | 9.7E-15 |
| ENSG00000179299 | NSUN7           | NOP2/Sun RNA methyltransferase family member 7 [Source:HGNC Symbol;Acc:HGNC:25857]             | 91   | -1.70 | 0.2128 | -8.0 | 1.4E-15 | 9.7E-15 |
| ENSG00000170927 | PKHD1           | PKHD1 ciliary IPT domain containing fibrocystin/polyductin [Source:HGNC Symbol;Acc:HGNC:9016]  | 70   | -9.52 | 1.1927 | -8.0 | 1.5E-15 | 9.9E-15 |
| ENSG00000124813 | RUNX2           | RUNX family transcription factor 2 [Source:HGNC Symbol;Acc:HGNC:10472]                         | 190  | -1.13 | 0.1415 | -8.0 | 1.5E-15 | 1.0E-14 |
| ENSG00000173930 | SLCO4C1         | solute carrier organic anion transporter family member 4C1 [Source:HGNC Symbol;Acc:HGNC:23612] | 34   | -3.97 | 0.4982 | -8.0 | 1.7E-15 | 1.1E-14 |
| ENSG00000183625 | CCR3            | C-C motif chemokine receptor 3 [Source:HGNC Symbol;Acc:HGNC:1604]                              | 298  | -0.87 | 0.1097 | -8.0 | 1.8E-15 | 1.2E-14 |
| ENSG00000153093 | ACOXL           | acyl-CoA oxidase like [Source:HGNC Symbol;Acc:HGNC:25621]                                      | 202  | -1.13 | 0.1425 | -8.0 | 1.8E-15 | 1.2E-14 |
| ENSG00000164654 | MIOS            | meiosis regulator for oocyte development [Source:HGNC Symbol;Acc:HGNC:21905]                   | 905  | -0.51 | 0.0638 | -7.9 | 1.9E-15 | 1.3E-14 |
| ENSG00000135119 | RNFT2           | ring finger protein, transmembrane 2 [Source:HGNC Symbol;Acc:HGNC:25905]                       | 78   | -1.82 | 0.2292 | -7.9 | 2.3E-15 | 1.5E-14 |
| ENSG00000158435 | CNOT11          | CCR4-NOT transcription complex subunit 11 [Source:HGNC Symbol;Acc:HGNC:25217]                  | 1078 | -0.55 | 0.0689 | -7.9 | 2.3E-15 | 1.5E-14 |
| ENSG00000100321 | SYNGR1          | synaptogyrin 1 [Source:HGNC Symbol;Acc:HGNC:11498]                                             | 775  | -0.56 | 0.0707 | -7.9 | 2.6E-15 | 1.7E-14 |
| ENSG00000180353 | HCLS1           | hematopoietic cell-specific Lyn substrate 1 [Source:HGNC Symbol;Acc:HGNC:4844]                 | 72   | -2.01 | 0.2540 | -7.9 | 2.6E-15 | 1.7E-14 |
| ENSG00000114796 | KLHL24          | kelch like family member 24 [Source:HGNC Symbol;Acc:HGNC:25947]                                | 243  | -0.99 | 0.1249 | -7.9 | 2.7E-15 | 1.8E-14 |
| ENSG00000100167 | SEPTIN3         | septin 3 [Source:HGNC Symbol;Acc:HGNC:10750]                                                   | 289  | -0.90 | 0.1140 | -7.9 | 3.0E-15 | 2.0E-14 |
| ENSG00000115353 | TACR1           | tachykinin receptor 1 [Source:HGNC Symbol;Acc:HGNC:11526]                                      | 44   | -2.75 | 0.3491 | -7.9 | 3.0E-15 | 2.0E-14 |
| ENSG00000120211 | INSL4           | insulin like 4 [Source:HGNC Symbol;Acc:HGNC:6087]                                              | 65   | -9.41 | 1.1936 | -7.9 | 3.1E-15 | 2.1E-14 |
| ENSG00000271930 | ENSG00000271930 | novel transcript                                                                               | 42   | -2.75 | 0.3498 | -7.9 | 3.4E-15 | 2.2E-14 |
| ENSG00000230798 | FOXO3-AS1       | FOXO3 antisense RNA 1 [Source:HGNC Symbol;Acc:HGNC:40241]                                      | 58   | -2.18 | 0.2774 | -7.9 | 3.6E-15 | 2.4E-14 |
| ENSG00000113657 | DPYSL3          | dihydropyrimidinase like 3 [Source:HGNC Symbol;Acc:HGNC:3015]                                  | 111  | -1.69 | 0.2144 | -7.9 | 3.8E-15 | 2.5E-14 |
| ENSG00000105894 | PTN             | pleiotrophin [Source:HGNC Symbol;Acc:HGNC:9630]                                                | 68   | -2.17 | 0.2763 | -7.9 | 4.0E-15 | 2.6E-14 |
| ENSG00000167987 | VPS37C          | VPS37C subunit of ESCRT-I [Source:HGNC Symbol;Acc:HGNC:26097]                                  | 903  | -0.51 | 0.0648 | -7.9 | 4.0E-15 | 2.6E-14 |
| ENSG00000132915 | PDE6A           | phosphodiesterase 6A [Source:HGNC Symbol;Acc:HGNC:8785]                                        | 43   | -2.76 | 0.3516 | -7.8 | 4.7E-15 | 3.1E-14 |
| ENSG00000156127 | BATF            | basic leucine zipper ATF-like transcription factor [Source:HGNC Symbol;Acc:HGNC:958]           | 34   | -3.61 | 0.4613 | -7.8 | 5.2E-15 | 3.4E-14 |
| ENSG00000020181 | ADGRA2          | adhesion G protein-coupled receptor A2 [Source:HGNC Symbol;Acc:HGNC:17849]                     | 158  | -1.21 | 0.1550 | -7.8 | 5.7E-15 | 3.7E-14 |
| ENSG00000138640 | FAM13A          | family with sequence similarity 13 member A [Source:HGNC Symbol;Acc:HGNC:19367]                | 220  | -1.02 | 0.1310 | -7.8 | 6.0E-15 | 3.9E-14 |
| ENSG00000133985 | TTC9            | tetratricopeptide repeat domain 9 [Source:HGNC Symbol;Acc:HGNC:20267]                          | 627  | -0.69 | 0.0889 | -7.8 | 6.2E-15 | 4.1E-14 |
| ENSG00000100767 | PAPLN           | papilin, proteoglycan like sulfated glycoprotein [Source:HGNC Symbol;Acc:HGNC:19262]           | 34   | -3.54 | 0.4535 | -7.8 | 6.4E-15 | 4.2E-14 |
| ENSG00000101665 | SMAD7           | SMAD family member 7 [Source:HGNC Symbol;Acc:HGNC:6773]                                        | 602  | -0.63 | 0.0803 | -7.8 | 6.5E-15 | 4.3E-14 |
| ENSG00000150625 | GPM6A           | glycoprotein M6A [Source:HGNC Symbol;Acc:HGNC:4460]                                            | 47   | -2.73 | 0.3507 | -7.8 | 6.5E-15 | 4.3E-14 |
| ENSG00000119906 | SLF2            | SMC5-SMC6 complex localization factor 2 [Source:HGNC Symbol;Acc:HGNC:17814]                    | 953  | -0.50 | 0.0646 | -7.8 | 7.3E-15 | 4.8E-14 |
| ENSG00000150477 | KIAA1328        | KIAA1328 [Source:HGNC Symbol;Acc:HGNC:29248]                                                   | 91   | -1.76 | 0.2260 | -7.8 | 7.3E-15 | 4.8E-14 |

|                 |           |                                                                                               |     |       |        |      |         |         |
|-----------------|-----------|-----------------------------------------------------------------------------------------------|-----|-------|--------|------|---------|---------|
| ENSG00000135374 | ELF5      | E74 like ETS transcription factor 5 [Source:HGNC Symbol;Acc:HGNC:3320]                        | 60  | -9.28 | 1.1945 | -7.8 | 7.7E-15 | 5.0E-14 |
| ENSG00000147485 | PXDNL     | peroxidasin like [Source:HGNC Symbol;Acc:HGNC:26359]                                          | 53  | -6.67 | 0.8591 | -7.8 | 8.1E-15 | 5.2E-14 |
| ENSG00000144355 | DLX1      | distal-less homeobox 1 [Source:HGNC Symbol;Acc:HGNC:2914]                                     | 381 | -0.76 | 0.0985 | -7.8 | 8.6E-15 | 5.6E-14 |
| ENSG00000121310 | ECHDC2    | enoyl-CoA hydratase domain containing 2 [Source:HGNC Symbol;Acc:HGNC:23408]                   | 645 | -0.63 | 0.0809 | -7.8 | 9.0E-15 | 5.8E-14 |
| ENSG00000177432 | NAP1L5    | nucleosome assembly protein 1 like 5 [Source:HGNC Symbol;Acc:HGNC:19968]                      | 189 | -1.07 | 0.1386 | -7.7 | 9.3E-15 | 6.1E-14 |
| ENSG00000184611 | KCNH7     | potassium voltage-gated channel subfamily H member 7 [Source:HGNC Symbol;Acc:HGNC:18863]      | 32  | -3.98 | 0.5140 | -7.7 | 9.7E-15 | 6.3E-14 |
| ENSG00000181908 | LINC02724 | long intergenic non-protein coding RNA 2724 [Source:HGNC Symbol;Acc:HGNC:54241]               | 41  | -5.89 | 0.7608 | -7.7 | 9.8E-15 | 6.3E-14 |
| ENSG00000135074 | ADAM19    | ADAM metalloproteinase domain 19 [Source:HGNC Symbol;Acc:HGNC:197]                            | 289 | -0.86 | 0.1109 | -7.7 | 1.0E-14 | 6.5E-14 |
| ENSG00000180155 | LYNX1     | Ly6/neurotoxin 1 [Source:HGNC Symbol;Acc:HGNC:29604]                                          | 930 | -0.53 | 0.0687 | -7.7 | 1.0E-14 | 6.5E-14 |
| ENSG00000178467 | P4HTM     | prolyl 4-hydroxylase, transmembrane [Source:HGNC Symbol;Acc:HGNC:28858]                       | 578 | -0.64 | 0.0832 | -7.7 | 1.1E-14 | 7.0E-14 |
| ENSG00000132688 | NES       | nestin [Source:HGNC Symbol;Acc:HGNC:7756]                                                     | 86  | -1.63 | 0.2113 | -7.7 | 1.2E-14 | 7.5E-14 |
| ENSG00000158301 | GPRASP2   | G protein-coupled receptor associated sorting protein 2 [Source:HGNC Symbol;Acc:HGNC:25169]   | 239 | -1.00 | 0.1295 | -7.7 | 1.2E-14 | 7.7E-14 |
| ENSG00000177076 | ACER2     | alkaline ceramidase 2 [Source:HGNC Symbol;Acc:HGNC:23675]                                     | 70  | -2.12 | 0.2751 | -7.7 | 1.3E-14 | 8.2E-14 |
| ENSG00000115361 | ACADL     | acyl-CoA dehydrogenase long chain [Source:HGNC Symbol;Acc:HGNC:88]                            | 52  | -6.64 | 0.8614 | -7.7 | 1.3E-14 | 8.2E-14 |
| ENSG00000115163 | CENPA     | centromere protein A [Source:HGNC Symbol;Acc:HGNC:1851]                                       | 749 | -0.64 | 0.0834 | -7.7 | 1.3E-14 | 8.3E-14 |
| ENSG00000070182 | SPTB      | spectrin beta, erythrocytic [Source:HGNC Symbol;Acc:HGNC:11274]                               | 40  | -2.75 | 0.3569 | -7.7 | 1.3E-14 | 8.3E-14 |
| ENSG00000158856 | DMTN      | dematin actin binding protein [Source:HGNC Symbol;Acc:HGNC:3382]                              | 200 | -1.05 | 0.1362 | -7.7 | 1.3E-14 | 8.3E-14 |
| ENSG00000143033 | MTF2      | metal response element binding transcription factor 2 [Source:HGNC Symbol;Acc:HGNC:29535]     | 764 | -0.54 | 0.0701 | -7.7 | 1.3E-14 | 8.6E-14 |
| ENSG00000108852 | MPP2      | membrane palmitoylated protein 2 [Source:HGNC Symbol;Acc:HGNC:7220]                           | 384 | -0.75 | 0.0971 | -7.7 | 1.4E-14 | 8.7E-14 |
| ENSG00000198754 | OXCT2     | 3-oxoacid CoA-transferase 2 [Source:HGNC Symbol;Acc:HGNC:18606]                               | 33  | -3.57 | 0.4641 | -7.7 | 1.4E-14 | 9.3E-14 |
| ENSG00000107957 | SH3PX2A   | SH3 and PX domains 2A [Source:HGNC Symbol;Acc:HGNC:23664]                                     | 731 | -0.56 | 0.0723 | -7.7 | 1.5E-14 | 9.7E-14 |
| ENSG00000239713 | APOBEC3G  | apolipoprotein B mRNA editing enzyme catalytic subunit 3G [Source:HGNC Symbol;Acc:HGNC:17357] | 348 | -0.76 | 0.0998 | -7.6 | 2.0E-14 | 1.3E-13 |
| ENSG00000077713 | SLC25A43  | solute carrier family 25 member 43 [Source:HGNC Symbol;Acc:HGNC:30557]                        | 545 | -0.65 | 0.0854 | -7.6 | 2.1E-14 | 1.4E-13 |
| ENSG00000122512 | PMS2      | PMS1 homolog 2, mismatch repair system component [Source:HGNC Symbol;Acc:HGNC:9122]           | 867 | -0.51 | 0.0666 | -7.6 | 2.1E-14 | 1.4E-13 |
| ENSG00000186806 | VSIG10L   | V-set and immunoglobulin domain containing 10 like [Source:HGNC Symbol;Acc:HGNC:27111]        | 469 | -0.68 | 0.0895 | -7.6 | 2.1E-14 | 1.4E-13 |
| ENSG00000164938 | TP53INP1  | tumor protein p53 inducible nuclear protein 1 [Source:HGNC Symbol;Acc:HGNC:18022]             | 169 | -1.16 | 0.1524 | -7.6 | 2.2E-14 | 1.4E-13 |
| ENSG00000075461 | CACNG4    | calcium voltage-gated channel auxiliary subunit gamma 4 [Source:HGNC Symbol;Acc:HGNC:1408]    | 887 | -0.51 | 0.0662 | -7.6 | 2.3E-14 | 1.5E-13 |
| ENSG00000055163 | CYFIP2    | cytoplasmic FMR1 interacting protein 2 [Source:HGNC Symbol;Acc:HGNC:13760]                    | 41  | -2.66 | 0.3489 | -7.6 | 2.4E-14 | 1.5E-13 |
| ENSG00000090539 | CHRD      | chordin [Source:HGNC Symbol;Acc:HGNC:1949]                                                    | 47  | -2.57 | 0.3373 | -7.6 | 2.5E-14 | 1.6E-13 |
| ENSG00000170465 | KRT6C     | keratin 6C [Source:HGNC Symbol;Acc:HGNC:20406]                                                | 39  | -2.88 | 0.3773 | -7.6 | 2.5E-14 | 1.6E-13 |
| ENSG00000101417 | PXMP4     | peroxisomal membrane protein 4 [Source:HGNC Symbol;Acc:HGNC:15920]                            | 784 | -0.52 | 0.0687 | -7.6 | 2.6E-14 | 1.6E-13 |
| ENSG00000165215 | CLDN3     | claudin 3 [Source:HGNC Symbol;Acc:HGNC:2045]                                                  | 38  | -2.84 | 0.3725 | -7.6 | 2.6E-14 | 1.7E-13 |
| ENSG00000021355 | SERPINB1  | serpin family B member 1 [Source:HGNC Symbol;Acc:HGNC:3311]                                   | 609 | -0.62 | 0.0809 | -7.6 | 2.6E-14 | 1.7E-13 |
| ENSG00000206557 | TRIM71    | tripartite motif containing 71 [Source:HGNC Symbol;Acc:HGNC:32669]                            | 30  | -4.07 | 0.5355 | -7.6 | 2.8E-14 | 1.8E-13 |
| ENSG00000155761 | SPAG17    | sperm associated antigen 17 [Source:HGNC Symbol;Acc:HGNC:26620]                               | 38  | -2.80 | 0.3688 | -7.6 | 2.8E-14 | 1.8E-13 |
| ENSG00000247809 | NR2F2-AS1 | NR2F2 antisense RNA 1 [Source:HGNC Symbol;Acc:HGNC:44222]                                     | 57  | -2.05 | 0.2701 | -7.6 | 2.9E-14 | 1.8E-13 |
| ENSG00000116985 | BMP8B     | bone morphogenetic protein 8b [Source:HGNC Symbol;Acc:HGNC:1075]                              | 91  | -1.65 | 0.2168 | -7.6 | 2.9E-14 | 1.8E-13 |
| ENSG00000253313 | C1orf210  | chromosome 1 open reading frame 210 [Source:HGNC Symbol;Acc:HGNC:28755]                       | 50  | -2.31 | 0.3036 | -7.6 | 2.9E-14 | 1.9E-13 |
| ENSG00000162069 | BICDL2    | BICD family like cargo adaptor 2 [Source:HGNC Symbol;Acc:HGNC:33584]                          | 187 | -1.11 | 0.1464 | -7.6 | 3.1E-14 | 1.9E-13 |
| ENSG00000112787 | FBRSL1    | fibrosin like 1 [Source:HGNC Symbol;Acc:HGNC:29308]                                           | 863 | -0.62 | 0.0813 | -7.6 | 3.1E-14 | 2.0E-13 |
| ENSG00000168067 | MAP4K2    | mitogen-activated protein kinase kinase kinase kinase 2 [Source:HGNC Symbol;Acc:HGNC:6864]    | 899 | -0.51 | 0.0673 | -7.6 | 3.2E-14 | 2.0E-13 |
| ENSG00000137968 | SLC44A5   | solute carrier family 44 member 5 [Source:HGNC Symbol;Acc:HGNC:28524]                         | 70  | -1.87 | 0.2468 | -7.6 | 3.6E-14 | 2.3E-13 |

|                 |                 |                                                                                                          |      |       |        |      |         |         |
|-----------------|-----------------|----------------------------------------------------------------------------------------------------------|------|-------|--------|------|---------|---------|
| ENSG00000247315 | ZCCHC3          | zinc finger CCHC-type containing 3 [Source:HGNC Symbol;Acc:HGNC:16230]                                   | 784  | -0.54 | 0.0713 | -7.6 | 3.8E-14 | 2.4E-13 |
| ENSG00000171130 | ATP6VOE2        | ATPase H+ transporting V0 subunit e2 [Source:HGNC Symbol;Acc:HGNC:21723]                                 | 636  | -0.59 | 0.0787 | -7.6 | 4.1E-14 | 2.6E-13 |
| ENSG00000137145 | DENND4C         | DENN domain containing 4C [Source:HGNC Symbol;Acc:HGNC:26079]                                            | 725  | -0.55 | 0.0727 | -7.6 | 4.1E-14 | 2.6E-13 |
| ENSG00000140795 | MYLK3           | myosin light chain kinase 3 [Source:HGNC Symbol;Acc:HGNC:29826]                                          | 51   | -2.21 | 0.2924 | -7.6 | 4.3E-14 | 2.7E-13 |
| ENSG00000070731 | ST6GALNAC       | ST6 N-acetylgalactosaminide alpha-2,6-sialyltransferase 2 [Source:HGNC Symbol;Acc:HGNC:10867]            | 182  | -1.06 | 0.1410 | -7.5 | 4.4E-14 | 2.8E-13 |
| ENSG00000178075 | GRAMD1C         | GRAM domain containing 1C [Source:HGNC Symbol;Acc:HGNC:25252]                                            | 46   | -2.38 | 0.3156 | -7.5 | 4.5E-14 | 2.8E-13 |
| ENSG00000115271 | GCA             | granulocystin [Source:HGNC Symbol;Acc:HGNC:15990]                                                        | 343  | -0.76 | 0.1012 | -7.5 | 4.7E-14 | 3.0E-13 |
| ENSG00000198771 | RCSL1           | RCSL domain containing 1 [Source:HGNC Symbol;Acc:HGNC:28310]                                             | 62   | -2.25 | 0.2983 | -7.5 | 4.8E-14 | 3.0E-13 |
| ENSG00000163220 | S100A9          | S100 calcium binding protein A9 [Source:HGNC Symbol;Acc:HGNC:10499]                                      | 5403 | -0.57 | 0.0759 | -7.5 | 4.9E-14 | 3.1E-13 |
| ENSG00000150627 | WDR17           | WD repeat domain 17 [Source:HGNC Symbol;Acc:HGNC:16661]                                                  | 84   | -1.61 | 0.2139 | -7.5 | 4.9E-14 | 3.1E-13 |
| ENSG00000186469 | GNG2            | G protein subunit gamma 2 [Source:HGNC Symbol;Acc:HGNC:4404]                                             | 42   | -2.81 | 0.3734 | -7.5 | 5.0E-14 | 3.1E-13 |
| ENSG00000154767 | XPC             | XPC complex subunit, DNA damage recognition and repair factor [Source:HGNC Symbol;Acc:HGNC:1281]         | 592  | -0.60 | 0.0793 | -7.5 | 5.1E-14 | 3.2E-13 |
| ENSG00000151276 | MAGI1           | membrane associated guanylate kinase, WW and PDZ domain containing 1 [Source:HGNC Symbol;Acc:HGNC:10044] | 723  | -0.57 | 0.0763 | -7.5 | 5.1E-14 | 3.2E-13 |
| ENSG00000100441 | KHNYN           | KH and NYN domain containing [Source:HGNC Symbol;Acc:HGNC:20166]                                         | 757  | -0.56 | 0.0744 | -7.5 | 5.2E-14 | 3.3E-13 |
| ENSG00000180667 | YOD1            | YOD1 deubiquitinase [Source:HGNC Symbol;Acc:HGNC:25035]                                                  | 538  | -0.66 | 0.0878 | -7.5 | 5.4E-14 | 3.4E-13 |
| ENSG00000140505 | CYP1A2          | cytochrome P450 family 1 subfamily A member 2 [Source:HGNC Symbol;Acc:HGNC:2596]                         | 30   | -4.60 | 0.6128 | -7.5 | 6.5E-14 | 4.1E-13 |
| ENSG00000123405 | NFE2            | nuclear factor, erythroid 2 [Source:HGNC Symbol;Acc:HGNC:7780]                                           | 91   | -1.53 | 0.2042 | -7.5 | 6.6E-14 | 4.2E-13 |
| ENSG00000185432 | METTL7A         | methyltransferase like 7A [Source:HGNC Symbol;Acc:HGNC:24550]                                            | 664  | -0.57 | 0.0766 | -7.5 | 6.8E-14 | 4.2E-13 |
| ENSG00000175182 | FAM131A         | family with sequence similarity 131 member A [Source:HGNC Symbol;Acc:HGNC:28308]                         | 283  | -0.86 | 0.1145 | -7.5 | 6.9E-14 | 4.3E-13 |
| ENSG00000178935 | ZNF552          | zinc finger protein 552 [Source:HGNC Symbol;Acc:HGNC:26135]                                              | 264  | -0.88 | 0.1177 | -7.4 | 9.5E-14 | 5.9E-13 |
| ENSG00000197847 | SLC22A20P       | solute carrier family 22 member 20, pseudogene [Source:HGNC Symbol;Acc:HGNC:29867]                       | 64   | -1.90 | 0.2560 | -7.4 | 1.0E-13 | 6.2E-13 |
| ENSG00000135823 | STX6            | syntaxin 6 [Source:HGNC Symbol;Acc:HGNC:11441]                                                           | 860  | -0.55 | 0.0733 | -7.4 | 1.0E-13 | 6.2E-13 |
| ENSG00000140600 | SH3GL3          | SH3 domain containing GRB2 like 3, endophilin A3 [Source:HGNC Symbol;Acc:HGNC:10832]                     | 37   | -2.78 | 0.3738 | -7.4 | 1.1E-13 | 6.5E-13 |
| ENSG00000168811 | IL12A           | interleukin 12A [Source:HGNC Symbol;Acc:HGNC:5969]                                                       | 68   | -1.81 | 0.2435 | -7.4 | 1.1E-13 | 6.5E-13 |
| ENSG00000152779 | SLC16A12        | solute carrier family 16 member 12 [Source:HGNC Symbol;Acc:HGNC:23094]                                   | 31   | -4.60 | 0.6192 | -7.4 | 1.1E-13 | 6.6E-13 |
| ENSG00000159167 | STC1            | stanniocalcin 1 [Source:HGNC Symbol;Acc:HGNC:11373]                                                      | 688  | -0.54 | 0.0725 | -7.4 | 1.1E-13 | 6.8E-13 |
| ENSG0000012171  | SEMA3B          | semaphorin 3B [Source:HGNC Symbol;Acc:HGNC:10724]                                                        | 88   | -1.53 | 0.2062 | -7.4 | 1.1E-13 | 7.1E-13 |
| ENSG00000101115 | SALL4           | spalt like transcription factor 4 [Source:HGNC Symbol;Acc:HGNC:15924]                                    | 73   | -1.72 | 0.2325 | -7.4 | 1.2E-13 | 7.5E-13 |
| ENSG00000119514 | GALNT12         | polypeptide N-acetylgalactosaminyltransferase 12 [Source:HGNC Symbol;Acc:HGNC:19877]                     | 451  | -0.73 | 0.0982 | -7.4 | 1.2E-13 | 7.6E-13 |
| ENSG00000182771 | GRID1           | glutamate ionotropic receptor delta type subunit 1 [Source:HGNC Symbol;Acc:HGNC:4575]                    | 30   | -4.55 | 0.6141 | -7.4 | 1.2E-13 | 7.7E-13 |
| ENSG00000260912 | ENSG00000260912 | novel transcript, overlapping ACER2                                                                      | 38   | -2.67 | 0.3610 | -7.4 | 1.3E-13 | 8.1E-13 |
| ENSG00000117479 | SLC19A2         | solute carrier family 19 member 2 [Source:HGNC Symbol;Acc:HGNC:10938]                                    | 569  | -0.60 | 0.0807 | -7.4 | 1.3E-13 | 8.3E-13 |
| ENSG00000198515 | CNGA1           | cyclic nucleotide gated channel subunit alpha 1 [Source:HGNC Symbol;Acc:HGNC:2148]                       | 50   | -2.25 | 0.3038 | -7.4 | 1.3E-13 | 8.3E-13 |
| ENSG00000172548 | NIPAL4          | NIPA like domain containing 4 [Source:HGNC Symbol;Acc:HGNC:28018]                                        | 31   | -4.86 | 0.6567 | -7.4 | 1.4E-13 | 8.4E-13 |
| ENSG00000133246 | PRAM1           | PML-RARA regulated adaptor molecule 1 [Source:HGNC Symbol;Acc:HGNC:30091]                                | 60   | -2.09 | 0.2828 | -7.4 | 1.4E-13 | 8.5E-13 |
| ENSG00000197496 | SLC2A10         | solute carrier family 2 member 10 [Source:HGNC Symbol;Acc:HGNC:13444]                                    | 674  | -0.54 | 0.0736 | -7.4 | 1.4E-13 | 8.5E-13 |
| ENSG00000196368 | NUDT11          | nudix hydrolase 11 [Source:HGNC Symbol;Acc:HGNC:18011]                                                   | 45   | -2.47 | 0.3348 | -7.4 | 1.5E-13 | 9.5E-13 |
| ENSG00000173226 | IQCB1           | IQ motif containing B1 [Source:HGNC Symbol;Acc:HGNC:28949]                                               | 378  | -0.75 | 0.1018 | -7.4 | 1.5E-13 | 9.5E-13 |
| ENSG00000070759 | TESK2           | testis associated actin remodelling kinase 2 [Source:HGNC Symbol;Acc:HGNC:11732]                         | 434  | -0.69 | 0.0935 | -7.4 | 1.6E-13 | 9.9E-13 |
| ENSG00000089060 | SLC8B1          | solute carrier family 8 member B1 [Source:HGNC Symbol;Acc:HGNC:26175]                                    | 435  | -0.68 | 0.0923 | -7.4 | 1.7E-13 | 1.0E-12 |
| ENSG00000136237 | RAPGEF5         | Rap guanine nucleotide exchange factor 5 [Source:HGNC Symbol;Acc:HGNC:16862]                             | 87   | -1.57 | 0.2134 | -7.4 | 1.7E-13 | 1.1E-12 |
| ENSG00000125648 | SLC25A23        | solute carrier family 25 member 23 [Source:HGNC Symbol;Acc:HGNC:19375]                                   | 708  | -0.59 | 0.0797 | -7.4 | 1.8E-13 | 1.1E-12 |

|                 |                 |                                                                                                |     |       |        |      |         |         |
|-----------------|-----------------|------------------------------------------------------------------------------------------------|-----|-------|--------|------|---------|---------|
| ENSG00000092067 | CEBPE           | CCAAT enhancer binding protein epsilon [Source:HGNC Symbol;Acc:HGNC:1836]                      | 68  | -2.11 | 0.2866 | -7.4 | 1.8E-13 | 1.1E-12 |
| ENSG00000163898 | LIPH            | lipase H [Source:HGNC Symbol;Acc:HGNC:18483]                                                   | 876 | -0.52 | 0.0709 | -7.4 | 1.9E-13 | 1.2E-12 |
| ENSG00000175352 | NRIP3           | nuclear receptor interacting protein 3 [Source:HGNC Symbol;Acc:HGNC:1167]                      | 69  | -1.74 | 0.2371 | -7.4 | 2.0E-13 | 1.2E-12 |
| ENSG00000143333 | RGS16           | regulator of G protein signaling 16 [Source:HGNC Symbol;Acc:HGNC:9997]                         | 49  | -2.31 | 0.3143 | -7.3 | 2.0E-13 | 1.2E-12 |
| ENSG00000129534 | MIS18BP1        | MIS18 binding protein 1 [Source:HGNC Symbol;Acc:HGNC:20190]                                    | 772 | -0.52 | 0.0707 | -7.3 | 2.1E-13 | 1.3E-12 |
| ENSG00000116106 | EPHA4           | EPH receptor A4 [Source:HGNC Symbol;Acc:HGNC:3388]                                             | 338 | -0.82 | 0.1119 | -7.3 | 2.3E-13 | 1.4E-12 |
| ENSG00000151468 | CCDC3           | coiled-coil domain containing 3 [Source:HGNC Symbol;Acc:HGNC:23813]                            | 39  | -2.78 | 0.3793 | -7.3 | 2.4E-13 | 1.5E-12 |
| ENSG00000151012 | SLC7A11         | solute carrier family 7 member 11 [Source:HGNC Symbol;Acc:HGNC:11059]                          | 738 | -0.54 | 0.0734 | -7.3 | 2.6E-13 | 1.6E-12 |
| ENSG00000148835 | TAF5            | TATA-box binding protein associated factor 5 [Source:HGNC Symbol;Acc:HGNC:11539]               | 242 | -0.89 | 0.1220 | -7.3 | 2.7E-13 | 1.6E-12 |
| ENSG00000162882 | HAAO            | 3-hydroxyanthranilate 3,4-dioxygenase [Source:HGNC Symbol;Acc:HGNC:4796]                       | 101 | -1.52 | 0.2083 | -7.3 | 2.8E-13 | 1.7E-12 |
| ENSG00000100033 | PRODH           | proline dehydrogenase 1 [Source:HGNC Symbol;Acc:HGNC:9453]                                     | 29  | -4.00 | 0.5473 | -7.3 | 2.8E-13 | 1.7E-12 |
| ENSG00000215018 | COL28A1         | collagen type XXVIII alpha 1 chain [Source:HGNC Symbol;Acc:HGNC:22442]                         | 42  | -2.42 | 0.3316 | -7.3 | 2.9E-13 | 1.7E-12 |
| ENSG00000073464 | CLCN4           | chloride voltage-gated channel 4 [Source:HGNC Symbol;Acc:HGNC:2022]                            | 241 | -0.88 | 0.1201 | -7.3 | 2.9E-13 | 1.7E-12 |
| ENSG00000075340 | ADD2            | adducin 2 [Source:HGNC Symbol;Acc:HGNC:244]                                                    | 177 | -1.06 | 0.1452 | -7.3 | 3.0E-13 | 1.8E-12 |
| ENSG00000174839 | DENND6A         | DENN domain containing 6A [Source:HGNC Symbol;Acc:HGNC:26635]                                  | 471 | -0.66 | 0.0906 | -7.3 | 3.1E-13 | 1.8E-12 |
| ENSG00000147231 | RADX            | RPA1 related single stranded DNA binding protein, X-linked [Source:HGNC Symbol;Acc:HGNC:25486] | 34  | -5.62 | 0.7705 | -7.3 | 3.1E-13 | 1.8E-12 |
| ENSG00000150471 | ADGRL3          | adhesion G protein-coupled receptor L3 [Source:HGNC Symbol;Acc:HGNC:20974]                     | 28  | -4.30 | 0.5902 | -7.3 | 3.2E-13 | 1.9E-12 |
| ENSG00000288066 | ENSG00000288066 | novel transcript, antisense to ARL5A                                                           | 72  | -1.74 | 0.2382 | -7.3 | 3.2E-13 | 1.9E-12 |
| ENSG00000125266 | EFNB2           | ephrin B2 [Source:HGNC Symbol;Acc:HGNC:3227]                                                   | 44  | -2.37 | 0.3253 | -7.3 | 3.5E-13 | 2.1E-12 |
| ENSG00000197632 | SERPINB2        | serpin family B member 2 [Source:HGNC Symbol;Acc:HGNC:8584]                                    | 29  | -3.98 | 0.5485 | -7.3 | 3.8E-13 | 2.3E-12 |
| ENSG00000234840 | LINC01239       | long intergenic non-protein coding RNA 1239 [Source:HGNC Symbol;Acc:HGNC:49796]                | 41  | -2.40 | 0.3310 | -7.3 | 3.9E-13 | 2.3E-12 |
| ENSG00000184160 | ADRA2C          | adrenoceptor alpha 2C [Source:HGNC Symbol;Acc:HGNC:283]                                        | 231 | -0.97 | 0.1341 | -7.2 | 4.2E-13 | 2.5E-12 |
| ENSG00000269609 | C10orf95-AS     | C10orf95 antisense RNA 1 [Source:HGNC Symbol;Acc:HGNC:45238]                                   | 239 | -0.98 | 0.1352 | -7.2 | 4.2E-13 | 2.5E-12 |
| ENSG00000107242 | PIP5K1B         | phosphatidylinositol-4-phosphate 5-kinase type 1 beta [Source:HGNC Symbol;Acc:HGNC:8995]       | 74  | -8.63 | 1.1912 | -7.2 | 4.2E-13 | 2.5E-12 |
| ENSG00000091157 | WDR7            | WD repeat domain 7 [Source:HGNC Symbol;Acc:HGNC:13490]                                         | 314 | -0.76 | 0.1050 | -7.2 | 4.3E-13 | 2.6E-12 |
| ENSG00000177125 | ZBTB34          | zinc finger and BTB domain containing 34 [Source:HGNC Symbol;Acc:HGNC:31446]                   | 259 | -0.83 | 0.1149 | -7.2 | 5.5E-13 | 3.3E-12 |
| ENSG00000237975 | FLG-AS1         | FLG antisense RNA 1 [Source:HGNC Symbol;Acc:HGNC:27913]                                        | 29  | -3.46 | 0.4810 | -7.2 | 6.4E-13 | 3.8E-12 |
| ENSG00000107020 | PLGRKT          | plasminogen receptor with a C-terminal lysine [Source:HGNC Symbol;Acc:HGNC:23633]              | 307 | -0.81 | 0.1129 | -7.2 | 6.4E-13 | 3.8E-12 |
| ENSG00000038945 | MSR1            | macrophage scavenger receptor 1 [Source:HGNC Symbol;Acc:HGNC:7376]                             | 46  | -2.36 | 0.3281 | -7.2 | 6.6E-13 | 3.9E-12 |
| ENSG00000095596 | CYP26A1         | cytochrome P450 family 26 subfamily A member 1 [Source:HGNC Symbol;Acc:HGNC:2603]              | 43  | -2.38 | 0.3311 | -7.2 | 7.2E-13 | 4.3E-12 |
| ENSG00000143473 | KCNH1           | potassium voltage-gated channel subfamily H member 1 [Source:HGNC Symbol;Acc:HGNC:6250]        | 29  | -5.03 | 0.7028 | -7.2 | 8.2E-13 | 4.8E-12 |
| ENSG00000205269 | TMEM170B        | transmembrane protein 170B [Source:HGNC Symbol;Acc:HGNC:34244]                                 | 165 | -1.06 | 0.1478 | -7.2 | 8.2E-13 | 4.8E-12 |
| ENSG00000156398 | SFXN2           | sideroflexin 2 [Source:HGNC Symbol;Acc:HGNC:16086]                                             | 224 | -0.90 | 0.1265 | -7.2 | 8.5E-13 | 5.0E-12 |
| ENSG00000128709 | HOXD9           | homeobox D9 [Source:HGNC Symbol;Acc:HGNC:5140]                                                 | 107 | -1.40 | 0.1963 | -7.1 | 8.7E-13 | 5.1E-12 |
| ENSG00000139531 | SUOX            | sulfite oxidase [Source:HGNC Symbol;Acc:HGNC:11460]                                            | 450 | -0.65 | 0.0912 | -7.1 | 9.0E-13 | 5.3E-12 |
| ENSG00000106123 | EPHB6           | EPH receptor B6 [Source:HGNC Symbol;Acc:HGNC:3396]                                             | 75  | -1.70 | 0.2377 | -7.1 | 9.8E-13 | 5.7E-12 |
| ENSG00000181061 | HIGD1A          | HIG1 hypoxia inducible domain family member 1A [Source:HGNC Symbol;Acc:HGNC:29527]             | 829 | -0.53 | 0.0748 | -7.1 | 9.8E-13 | 5.7E-12 |
| ENSG00000135116 | HRK             | harakiri, BCL2 interacting protein [Source:HGNC Symbol;Acc:HGNC:5185]                          | 298 | -0.80 | 0.1127 | -7.1 | 1.1E-12 | 6.4E-12 |
| ENSG00000168038 | ULK4            | unc-51 like kinase 4 [Source:HGNC Symbol;Acc:HGNC:15784]                                       | 199 | -0.95 | 0.1333 | -7.1 | 1.1E-12 | 6.5E-12 |
| ENSG00000132205 | EMILIN2         | elastin microfibril interfacier 2 [Source:HGNC Symbol;Acc:HGNC:19881]                          | 100 | -2.66 | 0.3741 | -7.1 | 1.2E-12 | 6.8E-12 |
| ENSG00000187764 | SEMA4D          | semaphorin 4D [Source:HGNC Symbol;Acc:HGNC:10732]                                              | 300 | -0.76 | 0.1075 | -7.1 | 1.2E-12 | 7.0E-12 |
| ENSG00000003096 | KLHL13          | kelch like family member 13 [Source:HGNC Symbol;Acc:HGNC:22931]                                | 32  | -2.97 | 0.4178 | -7.1 | 1.3E-12 | 7.4E-12 |

|                  |          |                                                                                                 |     |       |        |      |         |         |
|------------------|----------|-------------------------------------------------------------------------------------------------|-----|-------|--------|------|---------|---------|
| ENSG00000156273  | BACH1    | BTB domain and CNC homolog 1 [Source:HGNC Symbol;Acc:HGNC:935]                                  | 742 | -0.53 | 0.0752 | -7.1 | 1.3E-12 | 7.8E-12 |
| ENSG00000109576  | AADAT    | aminoadipate aminotransferase [Source:HGNC Symbol;Acc:HGNC:17929]                               | 362 | -0.70 | 0.0992 | -7.1 | 1.4E-12 | 7.9E-12 |
| ENSG00000168078  | PBK      | PDZ binding kinase [Source:HGNC Symbol;Acc:HGNC:18282]                                          | 659 | -0.52 | 0.0737 | -7.1 | 1.4E-12 | 8.1E-12 |
| ENSG00000149294  | NCAM1    | neural cell adhesion molecule 1 [Source:HGNC Symbol;Acc:HGNC:7656]                              | 47  | -2.33 | 0.3289 | -7.1 | 1.4E-12 | 8.1E-12 |
| ENSG00000153898  | MCOLN2   | mucolipin TRP cation channel 2 [Source:HGNC Symbol;Acc:HGNC:13357]                              | 29  | -3.27 | 0.4619 | -7.1 | 1.5E-12 | 8.5E-12 |
| ENSG00000162542  | TMCO4    | transmembrane and coiled-coil domains 4 [Source:HGNC Symbol;Acc:HGNC:27393]                     | 667 | -0.55 | 0.0771 | -7.1 | 1.5E-12 | 8.7E-12 |
| ENSG00000107882  | SUFU     | SUFU negative regulator of hedgehog signaling [Source:HGNC Symbol;Acc:HGNC:16466]               | 452 | -0.66 | 0.0933 | -7.1 | 1.5E-12 | 9.0E-12 |
| NA               | 38       | NA                                                                                              | 82  | -1.59 | 0.2255 | -7.1 | 1.6E-12 | 9.5E-12 |
| ENSG00000116254  | CHD5     | chromodomain helicase DNA binding protein 5 [Source:HGNC Symbol;Acc:HGNC:16816]                 | 395 | -0.67 | 0.0953 | -7.1 | 1.6E-12 | 9.6E-12 |
| ENSG00000165804  | ZNF219   | zinc finger protein 219 [Source:HGNC Symbol;Acc:HGNC:13011]                                     | 267 | -0.84 | 0.1195 | -7.1 | 1.7E-12 | 9.6E-12 |
| ENSG00000130590  | SAMD10   | sterile alpha motif domain containing 10 [Source:HGNC Symbol;Acc:HGNC:16129]                    | 355 | -0.71 | 0.1002 | -7.1 | 1.7E-12 | 9.8E-12 |
| ENSG00000130270  | ATP8B3   | ATPase phospholipid transporting 8B3 [Source:HGNC Symbol;Acc:HGNC:13535]                        | 39  | -2.48 | 0.3513 | -7.1 | 1.7E-12 | 1.0E-11 |
| ENSG00000132692  | BCAN     | brevican [Source:HGNC Symbol;Acc:HGNC:23059]                                                    | 41  | -2.39 | 0.3387 | -7.1 | 1.8E-12 | 1.0E-11 |
| ENSG00000243244  | STON1    | stonin 1 [Source:HGNC Symbol;Acc:HGNC:17003]                                                    | 35  | -2.60 | 0.3693 | -7.0 | 2.0E-12 | 1.1E-11 |
| ENSG00000114742  | WDR48    | WD repeat domain 48 [Source:HGNC Symbol;Acc:HGNC:30914]                                         | 655 | -0.54 | 0.0770 | -7.0 | 2.0E-12 | 1.1E-11 |
| ENSG00000125462  | MIR9-1HG | MIR9-1 host gene [Source:HGNC Symbol;Acc:HGNC:30780]                                            | 67  | -1.90 | 0.2706 | -7.0 | 2.1E-12 | 1.2E-11 |
| ENSG00000072422  | RHOBTB1  | Rho related BTB domain containing 1 [Source:HGNC Symbol;Acc:HGNC:18738]                         | 107 | -1.30 | 0.1848 | -7.0 | 2.4E-12 | 1.4E-11 |
| ENSG00000133135  | RNF128   | ring finger protein 128 [Source:HGNC Symbol;Acc:HGNC:21153]                                     | 33  | -8.44 | 1.2076 | -7.0 | 2.8E-12 | 1.6E-11 |
| ENSG00000182557  | SPNS3    | sphingolipid transporter 3 (putative) [Source:HGNC Symbol;Acc:HGNC:28433]                       | 31  | -2.92 | 0.4185 | -7.0 | 2.9E-12 | 1.6E-11 |
| ENSG00000174792  | ODAPH    | odontogenesis associated phosphoprotein [Source:HGNC Symbol;Acc:HGNC:26300]                     | 90  | -1.42 | 0.2032 | -7.0 | 2.9E-12 | 1.7E-11 |
| ENSG00000088386  | SLC15A1  | solute carrier family 15 member 1 [Source:HGNC Symbol;Acc:HGNC:10920]                           | 26  | -4.15 | 0.5946 | -7.0 | 3.0E-12 | 1.7E-11 |
| ENSG00000069020  | MAST4    | microtubule associated serine/threonine kinase family member 4 [Source:HGNC Symbol;Acc:HGNC:190 | 295 | -0.79 | 0.1132 | -7.0 | 3.0E-12 | 1.7E-11 |
| ENSG00000073605  | GSDMB    | gasdermin B [Source:HGNC Symbol;Acc:HGNC:23690]                                                 | 155 | -1.07 | 0.1534 | -7.0 | 3.1E-12 | 1.8E-11 |
| ENSG00000102547  | CAB39L   | calcium binding protein 39 like [Source:HGNC Symbol;Acc:HGNC:20290]                             | 159 | -1.04 | 0.1485 | -7.0 | 3.1E-12 | 1.8E-11 |
| ENSG00000242193  | CRYZL2P  | crystallin zeta like 2, pseudogene [Source:HGNC Symbol;Acc:HGNC:52164]                          | 172 | -1.02 | 0.1465 | -7.0 | 3.1E-12 | 1.8E-11 |
| ENSG00000115008  | IL1A     | interleukin 1 alpha [Source:HGNC Symbol;Acc:HGNC:5991]                                          | 27  | -3.70 | 0.5311 | -7.0 | 3.2E-12 | 1.8E-11 |
| ENSG00000108984  | MAP2K6   | mitogen-activated protein kinase kinase 6 [Source:HGNC Symbol;Acc:HGNC:6846]                    | 161 | -1.04 | 0.1496 | -7.0 | 3.3E-12 | 1.9E-11 |
| ENSG00000118156  | ZNF541   | zinc finger protein 541 [Source:HGNC Symbol;Acc:HGNC:25294]                                     | 76  | -1.54 | 0.2206 | -7.0 | 3.3E-12 | 1.9E-11 |
| ENSG00000151092  | NGLY1    | N-glycanase 1 [Source:HGNC Symbol;Acc:HGNC:17646]                                               | 598 | -0.57 | 0.0820 | -7.0 | 3.4E-12 | 1.9E-11 |
| ENSG00000182264  | IZUMO1   | izumo sperm-egg fusion 1 [Source:HGNC Symbol;Acc:HGNC:28539]                                    | 40  | -2.60 | 0.3742 | -7.0 | 3.6E-12 | 2.0E-11 |
| ENSG00000035664  | DAPK2    | death associated protein kinase 2 [Source:HGNC Symbol;Acc:HGNC:2675]                            | 168 | -1.07 | 0.1533 | -6.9 | 3.7E-12 | 2.1E-11 |
| ENSG00000163013  | FBXO41   | F-box protein 41 [Source:HGNC Symbol;Acc:HGNC:29409]                                            | 686 | -0.51 | 0.0727 | -6.9 | 3.7E-12 | 2.1E-11 |
| ENSG00000132965  | ALOX5AP  | arachidonate 5-lipoxygenase activating protein [Source:HGNC Symbol;Acc:HGNC:436]                | 233 | -2.34 | 0.3381 | -6.9 | 4.3E-12 | 2.5E-11 |
| ENSG00000177575  | CD163    | CD163 molecule [Source:HGNC Symbol;Acc:HGNC:1631]                                               | 192 | -2.07 | 0.2984 | -6.9 | 4.4E-12 | 2.5E-11 |
| ENSG000000174567 | GOLT1A   | golgi transport 1A [Source:HGNC Symbol;Acc:HGNC:24766]                                          | 30  | -2.94 | 0.4252 | -6.9 | 4.4E-12 | 2.5E-11 |
| ENSG00000226363  | HAGLROS  | HAGLR opposite strand lncRNA [Source:HGNC Symbol;Acc:HGNC:50646]                                | 52  | -2.06 | 0.2978 | -6.9 | 4.5E-12 | 2.6E-11 |
| ENSG00000136010  | ALDH1L2  | aldehyde dehydrogenase 1 family member L2 [Source:HGNC Symbol;Acc:HGNC:26777]                   | 408 | -0.67 | 0.0971 | -6.9 | 4.6E-12 | 2.6E-11 |
| ENSG00000165782  | PIP4P1   | phosphatidylinositol-4,5-bisphosphate 4-phosphatase 1 [Source:HGNC Symbol;Acc:HGNC:19299]       | 570 | -0.62 | 0.0893 | -6.9 | 5.0E-12 | 2.8E-11 |
| ENSG00000130595  | TNNT3    | troponin T3, fast skeletal type [Source:HGNC Symbol;Acc:HGNC:11950]                             | 31  | -8.35 | 1.2096 | -6.9 | 5.1E-12 | 2.9E-11 |
| ENSG00000162931  | TRIM17   | tripartite motif containing 17 [Source:HGNC Symbol;Acc:HGNC:13430]                              | 41  | -2.32 | 0.3364 | -6.9 | 5.2E-12 | 2.9E-11 |
| ENSG00000137135  | ARHGEF39 | Rho guanine nucleotide exchange factor 39 [Source:HGNC Symbol;Acc:HGNC:25909]                   | 453 | -0.66 | 0.0953 | -6.9 | 5.6E-12 | 3.2E-11 |
| ENSG00000102174  | PHEX     | phosphate regulating endopeptidase homolog X-linked [Source:HGNC Symbol;Acc:HGNC:8918]          | 101 | -1.31 | 0.1901 | -6.9 | 5.7E-12 | 3.2E-11 |

|                 |                 |                                                                                                            |     |       |        |      |         |         |
|-----------------|-----------------|------------------------------------------------------------------------------------------------------------|-----|-------|--------|------|---------|---------|
| ENSG00000099251 | HSD17B7P2       | hydroxysteroid 17-beta dehydrogenase 7 pseudogene 2 [Source:HGNC Symbol;Acc:HGNC:28120]                    | 50  | -2.05 | 0.2979 | -6.9 | 6.0E-12 | 3.3E-11 |
| ENSG00000177990 | DPY19L2         | dpy-19 like 2 [Source:HGNC Symbol;Acc:HGNC:19414]                                                          | 27  | -3.27 | 0.4758 | -6.9 | 6.0E-12 | 3.4E-11 |
| ENSG00000188921 | HACD4           | 3-hydroxyacyl-CoA dehydratase 4 [Source:HGNC Symbol;Acc:HGNC:20920]                                        | 67  | -1.81 | 0.2636 | -6.9 | 6.0E-12 | 3.4E-11 |
| ENSG00000069482 | GAL             | galanin and GMAP prepropeptide [Source:HGNC Symbol;Acc:HGNC:4114]                                          | 94  | -1.41 | 0.2048 | -6.9 | 6.3E-12 | 3.5E-11 |
| ENSG00000173110 | HSPA6           | heat shock protein family A (Hsp70) member 6 [Source:HGNC Symbol;Acc:HGNC:5239]                            | 205 | -1.98 | 0.2884 | -6.9 | 6.3E-12 | 3.5E-11 |
| ENSG00000165475 | CRYL1           | crystallin lambda 1 [Source:HGNC Symbol;Acc:HGNC:18246]                                                    | 61  | -1.73 | 0.2519 | -6.9 | 6.3E-12 | 3.6E-11 |
| ENSG00000110195 | FOLR1           | folate receptor alpha [Source:HGNC Symbol;Acc:HGNC:3791]                                                   | 56  | -8.22 | 1.1963 | -6.9 | 6.4E-12 | 3.6E-11 |
| ENSG00000073670 | ADAM11          | ADAM metallopeptidase domain 11 [Source:HGNC Symbol;Acc:HGNC:189]                                          | 172 | -1.00 | 0.1450 | -6.9 | 6.6E-12 | 3.7E-11 |
| ENSG00000158457 | TSPAN33         | tetraspanin 33 [Source:HGNC Symbol;Acc:HGNC:28743]                                                         | 239 | -0.84 | 0.1225 | -6.9 | 7.0E-12 | 3.9E-11 |
| ENSG00000198018 | ENTPD7          | ectonucleoside triphosphate diphosphohydrolase 7 [Source:HGNC Symbol;Acc:HGNC:19745]                       | 625 | -0.56 | 0.0815 | -6.9 | 7.0E-12 | 3.9E-11 |
| ENSG00000183826 | BTBD9           | BTB domain containing 9 [Source:HGNC Symbol;Acc:HGNC:21228]                                                | 395 | -0.66 | 0.0967 | -6.9 | 7.2E-12 | 4.0E-11 |
| ENSG00000185633 | NDUFA4L2        | NDUFA4 mitochondrial complex associated like 2 [Source:HGNC Symbol;Acc:HGNC:29836]                         | 81  | -1.59 | 0.2324 | -6.8 | 7.4E-12 | 4.1E-11 |
| ENSG00000221869 | CEBPD           | CCAAT enhancer binding protein delta [Source:HGNC Symbol;Acc:HGNC:1835]                                    | 713 | -0.51 | 0.0746 | -6.8 | 7.8E-12 | 4.3E-11 |
| ENSG00000054392 | HHAT            | hedgehog acyltransferase [Source:HGNC Symbol;Acc:HGNC:18270]                                               | 63  | -1.69 | 0.2470 | -6.8 | 7.9E-12 | 4.4E-11 |
| ENSG00000267534 | S1PR2           | sphingosine-1-phosphate receptor 2 [Source:HGNC Symbol;Acc:HGNC:3169]                                      | 238 | -0.87 | 0.1277 | -6.8 | 8.8E-12 | 4.9E-11 |
| ENSG00000156966 | B3GNT7          | UDP-GlcNAc:betaGal beta-1,3-N-acetylglucosaminyltransferase 7 [Source:HGNC Symbol;Acc:HGNC:188]            | 140 | -1.15 | 0.1690 | -6.8 | 9.0E-12 | 5.0E-11 |
| ENSG00000177685 | CRACR2B         | calcium release activated channel regulator 2B [Source:HGNC Symbol;Acc:HGNC:28703]                         | 55  | -1.92 | 0.2816 | -6.8 | 9.4E-12 | 5.2E-11 |
| ENSG00000143971 | ETAA1           | ETAA1 activator of ATR kinase [Source:HGNC Symbol;Acc:HGNC:24648]                                          | 698 | -0.51 | 0.0750 | -6.8 | 9.8E-12 | 5.4E-11 |
| ENSG00000184060 | ADAP2           | ArfGAP with dual PH domains 2 [Source:HGNC Symbol;Acc:HGNC:16487]                                          | 51  | -2.03 | 0.2986 | -6.8 | 9.8E-12 | 5.4E-11 |
| ENSG00000135063 | FAM189A2        | family with sequence similarity 189 member A2 [Source:HGNC Symbol;Acc:HGNC:24820]                          | 173 | -0.98 | 0.1439 | -6.8 | 9.9E-12 | 5.5E-11 |
| ENSG00000173040 | EVC2            | EvC ciliary complex subunit 2 [Source:HGNC Symbol;Acc:HGNC:19747]                                          | 25  | -3.60 | 0.5296 | -6.8 | 1.0E-11 | 5.5E-11 |
| ENSG00000105851 | PIK3CG          | phosphatidylinositol-4,5-bisphosphate 3-kinase catalytic subunit gamma [Source:HGNC Symbol;Acc:HGNC:10921] | 48  | -2.10 | 0.3083 | -6.8 | 1.0E-11 | 5.5E-11 |
| ENSG00000109667 | SLC2A9          | solute carrier family 2 member 9 [Source:HGNC Symbol;Acc:HGNC:13446]                                       | 53  | -1.89 | 0.2775 | -6.8 | 1.0E-11 | 5.6E-11 |
| ENSG00000253266 | ENSG00000253266 | novel transcript                                                                                           | 81  | -1.44 | 0.2114 | -6.8 | 1.1E-11 | 6.2E-11 |
| ENSG00000164465 | DCBLD1          | discoidin, CUB and LCCL domain containing 1 [Source:HGNC Symbol;Acc:HGNC:21479]                            | 405 | -0.68 | 0.1008 | -6.8 | 1.2E-11 | 6.5E-11 |
| ENSG00000166845 | C18orf54        | chromosome 18 open reading frame 54 [Source:HGNC Symbol;Acc:HGNC:13796]                                    | 338 | -0.70 | 0.1032 | -6.8 | 1.2E-11 | 6.8E-11 |
| ENSG00000213062 | ENSG00000213062 | novel transcript                                                                                           | 142 | -1.12 | 0.1658 | -6.8 | 1.3E-11 | 6.9E-11 |
| ENSG00000139835 | GRTP1           | growth hormone regulated TBC protein 1 [Source:HGNC Symbol;Acc:HGNC:20310]                                 | 243 | -0.83 | 0.1229 | -6.8 | 1.3E-11 | 7.2E-11 |
| ENSG00000198598 | MMP17           | matrix metallopeptidase 17 [Source:HGNC Symbol;Acc:HGNC:7163]                                              | 104 | -1.30 | 0.1926 | -6.8 | 1.4E-11 | 7.5E-11 |
| ENSG00000165617 | DACT1           | dishevelled binding antagonist of beta catenin 1 [Source:HGNC Symbol;Acc:HGNC:17748]                       | 65  | -1.84 | 0.2717 | -6.8 | 1.4E-11 | 7.5E-11 |
| ENSG00000044524 | EPHA3           | EPH receptor A3 [Source:HGNC Symbol;Acc:HGNC:3387]                                                         | 47  | -7.07 | 1.0467 | -6.8 | 1.4E-11 | 8.0E-11 |
| ENSG00000066248 | NGEF            | neuronal guanine nucleotide exchange factor [Source:HGNC Symbol;Acc:HGNC:7807]                             | 255 | -0.79 | 0.1177 | -6.8 | 1.5E-11 | 8.0E-11 |
| ENSG00000158050 | DUSP2           | dual specificity phosphatase 2 [Source:HGNC Symbol;Acc:HGNC:3068]                                          | 30  | -2.84 | 0.4204 | -6.7 | 1.5E-11 | 8.2E-11 |
| ENSG00000163406 | SLC15A2         | solute carrier family 15 member 2 [Source:HGNC Symbol;Acc:HGNC:10921]                                      | 36  | -2.58 | 0.3823 | -6.7 | 1.5E-11 | 8.3E-11 |
| ENSG00000238105 | GOLGA2P5        | GOLGA2 pseudogene 5 [Source:HGNC Symbol;Acc:HGNC:25315]                                                    | 165 | -0.99 | 0.1471 | -6.7 | 1.5E-11 | 8.3E-11 |
| ENSG00000174599 | TRAM1L1         | translocation associated membrane protein 1 like 1 [Source:HGNC Symbol;Acc:HGNC:28371]                     | 25  | -3.39 | 0.5020 | -6.7 | 1.5E-11 | 8.4E-11 |
| ENSG00000128965 | CHAC1           | ChaC glutathione specific gamma-glutamylcyclotransferase 1 [Source:HGNC Symbol;Acc:HGNC:28680]             | 289 | -0.75 | 0.1120 | -6.7 | 1.6E-11 | 8.8E-11 |
| ENSG00000226125 | LINC01907       | long intergenic non-protein coding RNA 1907 [Source:HGNC Symbol;Acc:HGNC:52726]                            | 87  | -1.46 | 0.2170 | -6.7 | 1.6E-11 | 9.0E-11 |
| ENSG00000155659 | VSIG4           | V-set and immunoglobulin domain containing 4 [Source:HGNC Symbol;Acc:HGNC:17032]                           | 45  | -2.02 | 0.3007 | -6.7 | 1.7E-11 | 9.4E-11 |
| ENSG00000100867 | DHRS2           | dehydrogenase/reductase 2 [Source:HGNC Symbol;Acc:HGNC:18349]                                              | 235 | -0.85 | 0.1264 | -6.7 | 1.7E-11 | 9.5E-11 |
| ENSG00000249116 | IRX4-AS1        | IRX4 antisense RNA 1 [Source:HGNC Symbol;Acc:HGNC:40305]                                                   | 25  | -3.47 | 0.5167 | -6.7 | 1.8E-11 | 9.6E-11 |
| ENSG00000139687 | RB1             | RB transcriptional corepressor 1 [Source:HGNC Symbol;Acc:HGNC:9884]                                        | 578 | -0.57 | 0.0847 | -6.7 | 1.8E-11 | 9.7E-11 |

|                 |                 |                                                                                                                |     |       |        |      |         |         |
|-----------------|-----------------|----------------------------------------------------------------------------------------------------------------|-----|-------|--------|------|---------|---------|
| ENSG00000178568 | ERBB4           | erb-b2 receptor tyrosine kinase 4 [Source:HGNC Symbol;Acc:HGNC:3432]                                           | 50  | -8.06 | 1.1994 | -6.7 | 1.8E-11 | 9.9E-11 |
| ENSG00000227471 | AKR1B15         | aldo-keto reductase family 1 member B15 [Source:HGNC Symbol;Acc:HGNC:37281]                                    | 77  | -1.55 | 0.2312 | -6.7 | 1.9E-11 | 1.0E-10 |
| ENSG00000149564 | ESAM            | endothelial cell adhesion molecule [Source:HGNC Symbol;Acc:HGNC:17474]                                         | 79  | -1.50 | 0.2236 | -6.7 | 2.0E-11 | 1.1E-10 |
| ENSG00000105755 | ETHE1           | ETHE1 persulfide dioxygenase [Source:HGNC Symbol;Acc:HGNC:23287]                                               | 417 | -0.64 | 0.0952 | -6.7 | 2.1E-11 | 1.1E-10 |
| ENSG00000167614 | TTYH1           | tweety family member 1 [Source:HGNC Symbol;Acc:HGNC:13476]                                                     | 56  | -1.77 | 0.2639 | -6.7 | 2.1E-11 | 1.2E-10 |
| ENSG00000147889 | CDKN2A          | cyclin dependent kinase inhibitor 2A [Source:HGNC Symbol;Acc:HGNC:1787]                                        | 32  | -2.77 | 0.4137 | -6.7 | 2.1E-11 | 1.2E-10 |
| ENSG00000266278 | LINC01910       | long intergenic non-protein coding RNA 1910 [Source:HGNC Symbol;Acc:HGNC:52729]                                | 139 | -1.08 | 0.1606 | -6.7 | 2.2E-11 | 1.2E-10 |
| ENSG00000087842 | PIR             | pirin [Source:HGNC Symbol;Acc:HGNC:30048]                                                                      | 261 | -0.79 | 0.1177 | -6.7 | 2.2E-11 | 1.2E-10 |
| ENSG00000136286 | MYO1G           | myosin IG [Source:HGNC Symbol;Acc:HGNC:13880]                                                                  | 54  | -1.83 | 0.2733 | -6.7 | 2.2E-11 | 1.2E-10 |
| ENSG00000080166 | DCT             | dopachrome tautomerase [Source:HGNC Symbol;Acc:HGNC:2709]                                                      | 53  | -2.01 | 0.3001 | -6.7 | 2.3E-11 | 1.2E-10 |
| ENSG00000230183 | CNOT6LP1        | CNOT6L pseudogene 1 [Source:HGNC Symbol;Acc:HGNC:32355]                                                        | 68  | -1.71 | 0.2562 | -6.7 | 2.4E-11 | 1.3E-10 |
| ENSG00000279141 | LINC01451       | long intergenic non-protein coding RNA 1451 [Source:NCBI gene (formerly Entrezgene);Acc:401561]                | 26  | -5.21 | 0.7806 | -6.7 | 2.4E-11 | 1.3E-10 |
| ENSG00000267325 | LINC01415       | long intergenic non-protein coding RNA 1415 [Source:HGNC Symbol;Acc:HGNC:50709]                                | 27  | -3.47 | 0.5197 | -6.7 | 2.6E-11 | 1.4E-10 |
| ENSG00000064218 | DMRT3           | doublesex and mab-3 related transcription factor 3 [Source:HGNC Symbol;Acc:HGNC:13909]                         | 25  | -3.46 | 0.5197 | -6.7 | 2.9E-11 | 1.6E-10 |
| ENSG00000008853 | RHOBTB2         | Rho related BTB domain containing 2 [Source:HGNC Symbol;Acc:HGNC:18756]                                        | 374 | -0.67 | 0.1003 | -6.7 | 2.9E-11 | 1.6E-10 |
| ENSG00000231131 | LNCAROD         | lncRNA activating regulator of DKK1 [Source:HGNC Symbol;Acc:HGNC:50913]                                        | 24  | -4.47 | 0.6728 | -6.6 | 3.0E-11 | 1.6E-10 |
| ENSG00000111752 | PHC1            | polyhomeotic homolog 1 [Source:HGNC Symbol;Acc:HGNC:3182]                                                      | 402 | -0.62 | 0.0937 | -6.6 | 3.0E-11 | 1.6E-10 |
| ENSG00000162738 | VANGL2          | VANGL planar cell polarity protein 2 [Source:HGNC Symbol;Acc:HGNC:15511]                                       | 579 | -0.53 | 0.0804 | -6.6 | 3.1E-11 | 1.7E-10 |
| ENSG00000101336 | HCK             | HCK proto-oncogene, Src family tyrosine kinase [Source:HGNC Symbol;Acc:HGNC:4840]                              | 37  | -2.35 | 0.3536 | -6.6 | 3.2E-11 | 1.7E-10 |
| ENSG00000166347 | CYB5A           | cytochrome b5 type A [Source:HGNC Symbol;Acc:HGNC:2570]                                                        | 363 | -0.64 | 0.0970 | -6.6 | 3.2E-11 | 1.7E-10 |
| ENSG00000165124 | SVEP1           | sushi, von Willebrand factor type A, EGF and pentraxin domain containing 1 [Source:HGNC Symbol;Acc:HGNC:29994] | 421 | -0.60 | 0.0912 | -6.6 | 3.5E-11 | 1.8E-10 |
| ENSG00000198092 | TMPRSS11F       | transmembrane serine protease 11F [Source:HGNC Symbol;Acc:HGNC:29994]                                          | 30  | -5.83 | 0.8795 | -6.6 | 3.5E-11 | 1.9E-10 |
| ENSG00000152749 | GPR180          | G protein-coupled receptor 180 [Source:HGNC Symbol;Acc:HGNC:28899]                                             | 328 | -0.70 | 0.1060 | -6.6 | 3.6E-11 | 1.9E-10 |
| ENSG00000018280 | SLC11A1         | solute carrier family 11 member 1 [Source:HGNC Symbol;Acc:HGNC:10907]                                          | 74  | -1.53 | 0.2313 | -6.6 | 3.6E-11 | 1.9E-10 |
| ENSG00000137261 | KIAA0319        | KIAA0319 [Source:HGNC Symbol;Acc:HGNC:21580]                                                                   | 60  | -1.70 | 0.2563 | -6.6 | 3.7E-11 | 2.0E-10 |
| ENSG00000261104 | ENSG00000261104 | novel transcript                                                                                               | 47  | -2.26 | 0.3420 | -6.6 | 3.8E-11 | 2.0E-10 |
| ENSG00000232628 | ENSG00000232628 | novel transcript                                                                                               | 59  | -1.75 | 0.2650 | -6.6 | 3.9E-11 | 2.1E-10 |
| ENSG00000160999 | SH2B2           | SH2B adaptor protein 2 [Source:HGNC Symbol;Acc:HGNC:17381]                                                     | 220 | -0.89 | 0.1343 | -6.6 | 4.0E-11 | 2.1E-10 |
| ENSG00000198168 | SVIP            | small VCP interacting protein [Source:HGNC Symbol;Acc:HGNC:25238]                                              | 412 | -0.61 | 0.0929 | -6.6 | 4.0E-11 | 2.2E-10 |
| ENSG00000277117 | ENSG00000277117 | novel protein, similar to inducible T-cell co-stimulator ligand ICOSLG                                         | 100 | -1.29 | 0.1960 | -6.6 | 4.0E-11 | 2.2E-10 |
| ENSG00000152061 | RABGAP1L        | RAB GTPase activating protein 1 like [Source:HGNC Symbol;Acc:HGNC:24663]                                       | 374 | -0.67 | 0.1009 | -6.6 | 4.1E-11 | 2.2E-10 |
| ENSG00000110375 | UPK2            | uroplakin 2 [Source:HGNC Symbol;Acc:HGNC:12579]                                                                | 61  | -1.70 | 0.2571 | -6.6 | 4.2E-11 | 2.2E-10 |
| ENSG00000133488 | SEC14L4         | SEC14 like lipid binding 4 [Source:HGNC Symbol;Acc:HGNC:20627]                                                 | 63  | -1.70 | 0.2583 | -6.6 | 4.2E-11 | 2.2E-10 |
| ENSG00000158164 | TMSB15A         | thymosin beta 15A [Source:HGNC Symbol;Acc:HGNC:30744]                                                          | 24  | -3.44 | 0.5213 | -6.6 | 4.3E-11 | 2.3E-10 |
| ENSG00000188883 | KLRG2           | killer cell lectin like receptor G2 [Source:HGNC Symbol;Acc:HGNC:24778]                                        | 80  | -1.43 | 0.2171 | -6.6 | 4.4E-11 | 2.3E-10 |
| ENSG00000160593 | JAML            | junction adhesion molecule like [Source:HGNC Symbol;Acc:HGNC:19084]                                            | 27  | -3.45 | 0.5233 | -6.6 | 4.4E-11 | 2.4E-10 |
| ENSG00000130511 | SSBP4           | single stranded DNA binding protein 4 [Source:HGNC Symbol;Acc:HGNC:15676]                                      | 587 | -0.54 | 0.0824 | -6.6 | 4.7E-11 | 2.5E-10 |
| ENSG00000001561 | ENPP4           | ectonucleotide pyrophosphatase/phosphodiesterase 4 [Source:HGNC Symbol;Acc:HGNC:3359]                          | 168 | -0.96 | 0.1465 | -6.6 | 4.8E-11 | 2.6E-10 |
| ENSG00000258661 | ENSG00000258661 | novel transcript, antisense to PAX9                                                                            | 29  | -5.77 | 0.8780 | -6.6 | 4.9E-11 | 2.6E-10 |
| ENSG00000106789 | CORO2A          | coronin 2A [Source:HGNC Symbol;Acc:HGNC:2255]                                                                  | 135 | -1.11 | 0.1690 | -6.6 | 5.0E-11 | 2.7E-10 |
| ENSG00000010030 | ETV7            | ETS variant transcription factor 7 [Source:HGNC Symbol;Acc:HGNC:18160]                                         | 232 | -0.83 | 0.1261 | -6.6 | 5.1E-11 | 2.7E-10 |
| ENSG00000205517 | RGL3            | ral guanine nucleotide dissociation stimulator like 3 [Source:HGNC Symbol;Acc:HGNC:30282]                      | 592 | -0.52 | 0.0785 | -6.6 | 5.3E-11 | 2.8E-10 |



|                 |            |                                                                                               |     |       |        |      |         |         |
|-----------------|------------|-----------------------------------------------------------------------------------------------|-----|-------|--------|------|---------|---------|
| ENSG00000171446 | KRT27      | keratin 27 [Source:HGNC Symbol;Acc:HGNC:30841]                                                | 23  | -4.72 | 0.7195 | -6.6 | 5.4E-11 | 2.9E-10 |
| ENSG00000285831 | ENSG000002 | novel transcript                                                                              | 29  | -5.78 | 0.8817 | -6.6 | 5.6E-11 | 3.0E-10 |
| ENSG00000158402 | CDC25C     | cell division cycle 25C [Source:HGNC Symbol;Acc:HGNC:1727]                                    | 365 | -0.64 | 0.0983 | -6.6 | 5.7E-11 | 3.0E-10 |
| ENSG00000130592 | LSP1       | lymphocyte specific protein 1 [Source:HGNC Symbol;Acc:HGNC:6707]                              | 44  | -2.16 | 0.3301 | -6.5 | 6.3E-11 | 3.3E-10 |
| ENSG00000214960 | CRPPA      | CDP-L-ribitol pyrophosphorylase A [Source:HGNC Symbol;Acc:HGNC:37276]                         | 185 | -0.89 | 0.1363 | -6.5 | 6.3E-11 | 3.3E-10 |
| ENSG00000260230 | FRRS1L     | ferric chelate reductase 1 like [Source:HGNC Symbol;Acc:HGNC:1362]                            | 25  | -3.15 | 0.4820 | -6.5 | 6.7E-11 | 3.5E-10 |
| ENSG00000185127 | C6orf120   | chromosome 6 open reading frame 120 [Source:HGNC Symbol;Acc:HGNC:21247]                       | 590 | -0.53 | 0.0812 | -6.5 | 6.8E-11 | 3.6E-10 |
| ENSG00000163818 | LZTFL1     | leucine zipper transcription factor like 1 [Source:HGNC Symbol;Acc:HGNC:6741]                 | 380 | -0.62 | 0.0948 | -6.5 | 7.1E-11 | 3.7E-10 |
| ENSG00000163053 | SLC16A14   | solute carrier family 16 member 14 [Source:HGNC Symbol;Acc:HGNC:26417]                        | 415 | -0.60 | 0.0926 | -6.5 | 7.1E-11 | 3.7E-10 |
| ENSG00000130193 | THEM6      | thioesterase superfamily member 6 [Source:HGNC Symbol;Acc:HGNC:29656]                         | 553 | -0.52 | 0.0799 | -6.5 | 7.2E-11 | 3.8E-10 |
| ENSG00000000938 | FGR        | FGR proto-oncogene, Src family tyrosine kinase [Source:HGNC Symbol;Acc:HGNC:3697]             | 50  | -2.12 | 0.3251 | -6.5 | 7.6E-11 | 4.0E-10 |
| ENSG00000166546 | BEAN1      | brain expressed associated with NEDD4 1 [Source:HGNC Symbol;Acc:HGNC:24160]                   | 99  | -1.27 | 0.1948 | -6.5 | 7.8E-11 | 4.1E-10 |
| ENSG00000102387 | TAF7L      | TATA-box binding protein associated factor 7 like [Source:HGNC Symbol;Acc:HGNC:11548]         | 23  | -4.67 | 0.7197 | -6.5 | 8.6E-11 | 4.5E-10 |
| ENSG00000154342 | WNT3A      | Wnt family member 3A [Source:HGNC Symbol;Acc:HGNC:15983]                                      | 27  | -3.03 | 0.4674 | -6.5 | 8.6E-11 | 4.5E-10 |
| ENSG00000143079 | CTTNBP2NL  | CTTNBP2 N-terminal like [Source:HGNC Symbol;Acc:HGNC:25330]                                   | 620 | -0.51 | 0.0786 | -6.5 | 8.8E-11 | 4.6E-10 |
| ENSG00000130734 | ATG4D      | autophagy related 4D cysteine peptidase [Source:HGNC Symbol;Acc:HGNC:20789]                   | 543 | -0.54 | 0.0838 | -6.5 | 8.9E-11 | 4.7E-10 |
| ENSG00000163701 | IL17RE     | interleukin 17 receptor E [Source:HGNC Symbol;Acc:HGNC:18439]                                 | 329 | -0.70 | 0.1076 | -6.5 | 9.4E-11 | 4.9E-10 |
| ENSG00000171631 | P2RY6      | pyrimidinergic receptor P2Y6 [Source:HGNC Symbol;Acc:HGNC:8543]                               | 134 | -1.12 | 0.1732 | -6.5 | 9.5E-11 | 4.9E-10 |
| ENSG00000255298 | OR8G5      | olfactory receptor family 8 subfamily G member 5 [Source:HGNC Symbol;Acc:HGNC:19622]          | 41  | -7.78 | 1.2018 | -6.5 | 9.7E-11 | 5.1E-10 |
| ENSG00000167925 | GHDC       | GH3 domain containing [Source:HGNC Symbol;Acc:HGNC:24438]                                     | 346 | -0.69 | 0.1068 | -6.5 | 1.0E-10 | 5.2E-10 |
| ENSG00000163216 | SPRR2D     | small proline rich protein 2D [Source:HGNC Symbol;Acc:HGNC:11264]                             | 42  | -2.09 | 0.3244 | -6.5 | 1.1E-10 | 5.5E-10 |
| ENSG00000134222 | PSRC1      | proline and serine rich coiled-coil 1 [Source:HGNC Symbol;Acc:HGNC:24472]                     | 643 | -0.50 | 0.0777 | -6.5 | 1.1E-10 | 5.6E-10 |
| ENSG00000133247 | KMT5C      | lysine methyltransferase 5C [Source:HGNC Symbol;Acc:HGNC:28405]                               | 513 | -0.54 | 0.0840 | -6.5 | 1.1E-10 | 5.7E-10 |
| ENSG00000133703 | KRAS       | KRAS proto-oncogene, GTPase [Source:HGNC Symbol;Acc:HGNC:6407]                                | 555 | -0.54 | 0.0836 | -6.4 | 1.1E-10 | 5.8E-10 |
| ENSG00000171227 | TMEM37     | transmembrane protein 37 [Source:HGNC Symbol;Acc:HGNC:18216]                                  | 40  | -2.08 | 0.3226 | -6.4 | 1.1E-10 | 5.9E-10 |
| ENSG00000103056 | SMPD3      | sphingomyelin phosphodiesterase 3 [Source:HGNC Symbol;Acc:HGNC:14240]                         | 163 | -0.95 | 0.1472 | -6.4 | 1.1E-10 | 5.9E-10 |
| ENSG00000178078 | STAP2      | signal transducing adaptor family member 2 [Source:HGNC Symbol;Acc:HGNC:30430]                | 523 | -0.56 | 0.0868 | -6.4 | 1.2E-10 | 6.0E-10 |
| ENSG00000258949 | ENSG000002 | novel transcript, antisense to C14orf28                                                       | 26  | -2.91 | 0.4524 | -6.4 | 1.2E-10 | 6.1E-10 |
| ENSG00000270002 | ENSG000002 | novel transcript, antisense to GRID1                                                          | 24  | -3.31 | 0.5147 | -6.4 | 1.2E-10 | 6.2E-10 |
| ENSG00000128602 | SMO        | smoothed, frizzled class receptor [Source:HGNC Symbol;Acc:HGNC:11119]                         | 316 | -0.68 | 0.1062 | -6.4 | 1.3E-10 | 6.5E-10 |
| ENSG00000157470 | FAM81A     | family with sequence similarity 81 member A [Source:HGNC Symbol;Acc:HGNC:28379]               | 80  | -1.38 | 0.2141 | -6.4 | 1.3E-10 | 6.6E-10 |
| ENSG00000155307 | SAMSN1     | SAM domain, SH3 domain and nuclear localization signals 1 [Source:HGNC Symbol;Acc:HGNC:10528] | 32  | -2.61 | 0.4070 | -6.4 | 1.4E-10 | 7.0E-10 |
| ENSG00000107890 | ANKRD26    | ankyrin repeat domain 26 [Source:HGNC Symbol;Acc:HGNC:29186]                                  | 392 | -0.60 | 0.0930 | -6.4 | 1.4E-10 | 7.3E-10 |
| ENSG00000177551 | NHLH2      | nescient helix-loop-helix 2 [Source:HGNC Symbol;Acc:HGNC:7818]                                | 22  | -7.85 | 1.2247 | -6.4 | 1.4E-10 | 7.3E-10 |
| ENSG00000097096 | SYDE2      | synapse defective Rho GTPase homolog 2 [Source:HGNC Symbol;Acc:HGNC:25841]                    | 215 | -0.86 | 0.1338 | -6.4 | 1.5E-10 | 7.5E-10 |
| ENSG00000155749 | FLACC1     | flagellum associated containing coiled-coil domains 1 [Source:HGNC Symbol;Acc:HGNC:14439]     | 34  | -2.34 | 0.3654 | -6.4 | 1.5E-10 | 7.7E-10 |
| ENSG00000111058 | ACSS3      | acyl-CoA synthetase short chain family member 3 [Source:HGNC Symbol;Acc:HGNC:24723]           | 21  | -4.09 | 0.6395 | -6.4 | 1.5E-10 | 7.8E-10 |
| ENSG00000141639 | MAPK4      | mitogen-activated protein kinase 4 [Source:HGNC Symbol;Acc:HGNC:6878]                         | 25  | -3.04 | 0.4752 | -6.4 | 1.5E-10 | 7.9E-10 |
| ENSG00000084628 | NKAIN1     | sodium/potassium transporting ATPase interacting 1 [Source:HGNC Symbol;Acc:HGNC:25743]        | 56  | -1.70 | 0.2666 | -6.4 | 1.6E-10 | 8.2E-10 |
| ENSG00000101489 | CELF4      | CUGBP Elav-like family member 4 [Source:HGNC Symbol;Acc:HGNC:14015]                           | 49  | -1.87 | 0.2930 | -6.4 | 1.7E-10 | 8.7E-10 |
| ENSG00000287887 | ENSG000002 | novel transcript                                                                              | 37  | -6.73 | 1.0537 | -6.4 | 1.7E-10 | 8.9E-10 |
| ENSG00000223802 | CERS1      | ceramide synthase 1 [Source:HGNC Symbol;Acc:HGNC:14253]                                       | 97  | -1.28 | 0.2004 | -6.4 | 1.7E-10 | 9.0E-10 |

|                 |                 |                                                                                                  |     |       |        |      |         |         |
|-----------------|-----------------|--------------------------------------------------------------------------------------------------|-----|-------|--------|------|---------|---------|
| ENSG00000177679 | SRRM3           | serine/arginine repetitive matrix 3 [Source:HGNC Symbol;Acc:HGNC:26729]                          | 127 | -1.06 | 0.1665 | -6.4 | 1.9E-10 | 9.6E-10 |
| ENSG00000184005 | ST6GALNAC3      | ST6 N-acetylgalactosaminide alpha-2,6-sialyltransferase 3 [Source:HGNC Symbol;Acc:HGNC:19343]    | 35  | -2.29 | 0.3588 | -6.4 | 1.9E-10 | 9.6E-10 |
| ENSG00000234678 | ELF3-AS1        | ELF3 antisense RNA 1 [Source:HGNC Symbol;Acc:HGNC:40211]                                         | 144 | -1.00 | 0.1579 | -6.4 | 2.0E-10 | 1.0E-09 |
| ENSG00000189350 | TOGARAM2        | TOG array regulator of axonemal microtubules 2 [Source:HGNC Symbol;Acc:HGNC:33715]               | 46  | -1.91 | 0.3003 | -6.4 | 2.0E-10 | 1.0E-09 |
| ENSG00000138650 | PCDH10          | protocadherin 10 [Source:HGNC Symbol;Acc:HGNC:13404]                                             | 24  | -3.08 | 0.4852 | -6.4 | 2.1E-10 | 1.1E-09 |
| ENSG0000010404  | IDS             | iduronate 2-sulfatase [Source:HGNC Symbol;Acc:HGNC:5389]                                         | 350 | -0.63 | 0.0996 | -6.4 | 2.1E-10 | 1.1E-09 |
| ENSG00000101680 | LAMA1           | laminin subunit alpha 1 [Source:HGNC Symbol;Acc:HGNC:6481]                                       | 66  | -1.62 | 0.2545 | -6.4 | 2.1E-10 | 1.1E-09 |
| ENSG00000101445 | PPP1R16B        | protein phosphatase 1 regulatory subunit 16B [Source:HGNC Symbol;Acc:HGNC:15850]                 | 36  | -2.19 | 0.3461 | -6.3 | 2.3E-10 | 1.2E-09 |
| ENSG00000272732 | ENSG00000272732 | novel transcript                                                                                 | 41  | -2.03 | 0.3209 | -6.3 | 2.5E-10 | 1.2E-09 |
| ENSG00000260244 | ENSG00000260244 | novel transcript, overlapping GUCY1A3                                                            | 26  | -5.60 | 0.8848 | -6.3 | 2.5E-10 | 1.3E-09 |
| ENSG00000144407 | PTH2R           | parathyroid hormone 2 receptor [Source:HGNC Symbol;Acc:HGNC:9609]                                | 37  | -7.62 | 1.2046 | -6.3 | 2.5E-10 | 1.3E-09 |
| ENSG00000213965 | NUDT19          | nudix hydrolase 19 [Source:HGNC Symbol;Acc:HGNC:32036]                                           | 678 | -0.55 | 0.0864 | -6.3 | 2.5E-10 | 1.3E-09 |
| ENSG00000153012 | LGI2            | leucine rich repeat LGI family member 2 [Source:HGNC Symbol;Acc:HGNC:18710]                      | 30  | -2.66 | 0.4208 | -6.3 | 2.7E-10 | 1.3E-09 |
| ENSG00000092758 | COL9A3          | collagen type IX alpha 3 chain [Source:HGNC Symbol;Acc:HGNC:2219]                                | 63  | -1.59 | 0.2516 | -6.3 | 2.7E-10 | 1.4E-09 |
| ENSG00000180537 | RNF182          | ring finger protein 182 [Source:HGNC Symbol;Acc:HGNC:28522]                                      | 49  | -1.78 | 0.2829 | -6.3 | 2.9E-10 | 1.5E-09 |
| ENSG00000163050 | COQ8A           | coenzyme Q8A [Source:HGNC Symbol;Acc:HGNC:16812]                                                 | 262 | -0.74 | 0.1167 | -6.3 | 3.0E-10 | 1.5E-09 |
| ENSG00000278948 | ENSG00000278948 | TEC                                                                                              | 48  | -1.83 | 0.2908 | -6.3 | 3.0E-10 | 1.5E-09 |
| ENSG00000138795 | LEF1            | lymphoid enhancer binding factor 1 [Source:HGNC Symbol;Acc:HGNC:6551]                            | 31  | -2.46 | 0.3914 | -6.3 | 3.0E-10 | 1.5E-09 |
| ENSG00000005108 | THSD7A          | thrombospondin type 1 domain containing 7A [Source:HGNC Symbol;Acc:HGNC:22207]                   | 123 | -1.07 | 0.1705 | -6.3 | 3.1E-10 | 1.6E-09 |
| ENSG00000143452 | HORMAD1         | HORMA domain containing 1 [Source:HGNC Symbol;Acc:HGNC:25245]                                    | 115 | -1.11 | 0.1760 | -6.3 | 3.1E-10 | 1.6E-09 |
| ENSG00000007968 | E2F2            | E2F transcription factor 2 [Source:HGNC Symbol;Acc:HGNC:3114]                                    | 138 | -1.03 | 0.1631 | -6.3 | 3.2E-10 | 1.6E-09 |
| ENSG00000205364 | MT1M            | metallothionein 1M [Source:HGNC Symbol;Acc:HGNC:14296]                                           | 21  | -4.58 | 0.7281 | -6.3 | 3.3E-10 | 1.6E-09 |
| ENSG00000145882 | PCYOX1L         | prenylcysteine oxidase 1 like [Source:HGNC Symbol;Acc:HGNC:28477]                                | 147 | -1.00 | 0.1597 | -6.3 | 3.4E-10 | 1.7E-09 |
| ENSG00000188811 | NHLRC3          | NHL repeat containing 3 [Source:HGNC Symbol;Acc:HGNC:33751]                                      | 320 | -0.79 | 0.1251 | -6.3 | 3.4E-10 | 1.7E-09 |
| ENSG00000180346 | TIGD2           | tigger transposable element derived 2 [Source:HGNC Symbol;Acc:HGNC:18333]                        | 523 | -0.52 | 0.0825 | -6.3 | 3.4E-10 | 1.7E-09 |
| ENSG0000020633  | RUNX3           | RUNX family transcription factor 3 [Source:HGNC Symbol;Acc:HGNC:10473]                           | 163 | -0.94 | 0.1494 | -6.3 | 3.5E-10 | 1.8E-09 |
| ENSG00000196151 | WDSUB1          | WD repeat, sterile alpha motif and U-box domain containing 1 [Source:HGNC Symbol;Acc:HGNC:26697] | 237 | -0.76 | 0.1217 | -6.3 | 3.6E-10 | 1.8E-09 |
| ENSG00000206530 | CFAP44          | cilia and flagella associated protein 44 [Source:HGNC Symbol;Acc:HGNC:25631]                     | 125 | -1.06 | 0.1684 | -6.3 | 3.6E-10 | 1.8E-09 |
| ENSG00000224189 | HAGLR           | HOXD antisense growth-associated long non-coding RNA [Source:HGNC Symbol;Acc:HGNC:43755]         | 31  | -2.66 | 0.4241 | -6.3 | 3.8E-10 | 1.9E-09 |
| ENSG00000165973 | NELL1           | neural EGFL like 1 [Source:HGNC Symbol;Acc:HGNC:7750]                                            | 34  | -6.61 | 1.0555 | -6.3 | 3.8E-10 | 1.9E-09 |
| ENSG00000160801 | PTH1R           | parathyroid hormone 1 receptor [Source:HGNC Symbol;Acc:HGNC:9608]                                | 25  | -2.83 | 0.4527 | -6.3 | 3.8E-10 | 1.9E-09 |
| ENSG00000108830 | RND2            | Rho family GTPase 2 [Source:HGNC Symbol;Acc:HGNC:18315]                                          | 43  | -1.96 | 0.3133 | -6.2 | 4.2E-10 | 2.1E-09 |
| ENSG00000128346 | C22orf23        | chromosome 22 open reading frame 23 [Source:HGNC Symbol;Acc:HGNC:18589]                          | 87  | -1.31 | 0.2097 | -6.2 | 4.3E-10 | 2.1E-09 |
| ENSG00000275223 | ENSG00000275223 | novel transcript                                                                                 | 68  | -1.49 | 0.2380 | -6.2 | 4.3E-10 | 2.1E-09 |
| ENSG00000181744 | DIPK2A          | divergent protein kinase domain 2A [Source:HGNC Symbol;Acc:HGNC:28490]                           | 306 | -0.68 | 0.1087 | -6.2 | 4.3E-10 | 2.2E-09 |
| ENSG00000166086 | JAM3            | junctional adhesion molecule 3 [Source:HGNC Symbol;Acc:HGNC:15532]                               | 93  | -1.27 | 0.2038 | -6.2 | 4.4E-10 | 2.2E-09 |
| ENSG00000197415 | VEPH1           | ventricular zone expressed PH domain containing 1 [Source:HGNC Symbol;Acc:HGNC:25735]            | 365 | -0.61 | 0.0971 | -6.2 | 4.4E-10 | 2.2E-09 |
| ENSG00000060069 | CTDP1           | CTD phosphatase subunit 1 [Source:HGNC Symbol;Acc:HGNC:2498]                                     | 516 | -0.53 | 0.0844 | -6.2 | 4.6E-10 | 2.3E-09 |
| ENSG00000186838 | SELENOV         | selenoprotein V [Source:HGNC Symbol;Acc:HGNC:30399]                                              | 26  | -2.92 | 0.4694 | -6.2 | 4.7E-10 | 2.3E-09 |
| ENSG00000176887 | SOX11           | SRY-box transcription factor 11 [Source:HGNC Symbol;Acc:HGNC:11191]                              | 37  | -2.28 | 0.3657 | -6.2 | 4.7E-10 | 2.4E-09 |
| ENSG00000132563 | REEP2           | receptor accessory protein 2 [Source:HGNC Symbol;Acc:HGNC:17975]                                 | 40  | -2.01 | 0.3235 | -6.2 | 5.0E-10 | 2.5E-09 |
| ENSG00000163218 | PGLYRP4         | peptidoglycan recognition protein 4 [Source:HGNC Symbol;Acc:HGNC:30015]                          | 70  | -1.46 | 0.2351 | -6.2 | 5.1E-10 | 2.6E-09 |

|                 |                 |                                                                                                |     |       |        |      |         |         |
|-----------------|-----------------|------------------------------------------------------------------------------------------------|-----|-------|--------|------|---------|---------|
| ENSG00000197471 | SPN             | sialoporphin [Source:HGNC Symbol;Acc:HGNC:11249]                                               | 68  | -1.54 | 0.2480 | -6.2 | 5.9E-10 | 2.9E-09 |
| ENSG00000179546 | HTR1D           | 5-hydroxytryptamine receptor 1D [Source:HGNC Symbol;Acc:HGNC:5289]                             | 163 | -0.89 | 0.1445 | -6.2 | 6.1E-10 | 3.0E-09 |
| ENSG00000155269 | GPR78           | G protein-coupled receptor 78 [Source:HGNC Symbol;Acc:HGNC:4528]                               | 28  | -2.66 | 0.4296 | -6.2 | 6.4E-10 | 3.2E-09 |
| ENSG00000169896 | ITGAM           | integrin subunit alpha M [Source:HGNC Symbol;Acc:HGNC:6149]                                    | 34  | -2.40 | 0.3892 | -6.2 | 7.1E-10 | 3.5E-09 |
| ENSG00000106278 | PTPRZ1          | protein tyrosine phosphatase receptor type Z1 [Source:HGNC Symbol;Acc:HGNC:9685]               | 126 | -2.40 | 0.3895 | -6.2 | 7.1E-10 | 3.5E-09 |
| ENSG00000152583 | SPARCL1         | SPARC like 1 [Source:HGNC Symbol;Acc:HGNC:11220]                                               | 58  | -1.80 | 0.2923 | -6.2 | 7.4E-10 | 3.7E-09 |
| ENSG00000151790 | TDO2            | tryptophan 2,3-dioxygenase [Source:HGNC Symbol;Acc:HGNC:11708]                                 | 31  | -2.37 | 0.3864 | -6.1 | 8.0E-10 | 3.9E-09 |
| ENSG00000247287 | ENSG00000247287 | novel transcript, antisense to PRKCH                                                           | 23  | -2.99 | 0.4865 | -6.1 | 8.0E-10 | 3.9E-09 |
| ENSG00000168071 | CCDC88B         | coiled-coil domain containing 88B [Source:HGNC Symbol;Acc:HGNC:26757]                          | 187 | -0.87 | 0.1413 | -6.1 | 8.0E-10 | 4.0E-09 |
| ENSG00000242259 | C22orf39        | chromosome 22 open reading frame 39 [Source:HGNC Symbol;Acc:HGNC:27012]                        | 281 | -0.77 | 0.1248 | -6.1 | 8.4E-10 | 4.1E-09 |
| ENSG00000074047 | GLI2            | GLI family zinc finger 2 [Source:HGNC Symbol;Acc:HGNC:4318]                                    | 39  | -2.00 | 0.3255 | -6.1 | 8.5E-10 | 4.2E-09 |
| ENSG00000258115 | ENSG00000258115 | novel transcript, antisense to TPH2                                                            | 32  | -7.41 | 1.2087 | -6.1 | 8.6E-10 | 4.2E-09 |
| ENSG00000180447 | GAS1            | growth arrest specific 1 [Source:HGNC Symbol;Acc:HGNC:4165]                                    | 286 | -0.69 | 0.1121 | -6.1 | 8.7E-10 | 4.3E-09 |
| ENSG00000248599 | FLJ42969        | uncharacterized LOC441374 [Source:NCBI gene (formerly Entrezgene);Acc:441374]                  | 52  | -1.80 | 0.2948 | -6.1 | 9.3E-10 | 4.6E-09 |
| ENSG00000178385 | PLEKHM3         | pleckstrin homology domain containing M3 [Source:HGNC Symbol;Acc:HGNC:34006]                   | 242 | -0.74 | 0.1208 | -6.1 | 9.4E-10 | 4.6E-09 |
| ENSG00000244300 | GATA2-AS1       | GATA2 antisense RNA 1 [Source:HGNC Symbol;Acc:HGNC:51108]                                      | 647 | -0.52 | 0.0854 | -6.1 | 9.7E-10 | 4.8E-09 |
| ENSG00000224652 | LINC00885       | long intergenic non-protein coding RNA 885 [Source:HGNC Symbol;Acc:HGNC:48571]                 | 109 | -1.17 | 0.1925 | -6.1 | 1.1E-09 | 5.5E-09 |
| ENSG00000006042 | TMEM98          | transmembrane protein 98 [Source:HGNC Symbol;Acc:HGNC:24529]                                   | 43  | -1.94 | 0.3178 | -6.1 | 1.1E-09 | 5.5E-09 |
| ENSG00000251348 | HSPD1P11        | heat shock protein family D (Hsp60) member 1 pseudogene 11 [Source:HGNC Symbol;Acc:HGNC:35142] | 66  | -1.49 | 0.2448 | -6.1 | 1.2E-09 | 5.7E-09 |
| ENSG00000125845 | BMP2            | bone morphogenetic protein 2 [Source:HGNC Symbol;Acc:HGNC:1069]                                | 299 | -0.68 | 0.1111 | -6.1 | 1.2E-09 | 5.8E-09 |
| ENSG00000183145 | RIPPLY3         | rippy transcriptional repressor 3 [Source:HGNC Symbol;Acc:HGNC:3047]                           | 124 | -1.03 | 0.1701 | -6.1 | 1.2E-09 | 5.9E-09 |
| ENSG0000025039  | RARGD           | Ras related GTP binding D [Source:HGNC Symbol;Acc:HGNC:19903]                                  | 96  | -1.19 | 0.1953 | -6.1 | 1.2E-09 | 6.0E-09 |
| ENSG00000111266 | DUSP16          | dual specificity phosphatase 16 [Source:HGNC Symbol;Acc:HGNC:17909]                            | 321 | -0.66 | 0.1095 | -6.1 | 1.2E-09 | 6.0E-09 |
| ENSG00000168621 | GDNF            | glial cell derived neurotrophic factor [Source:HGNC Symbol;Acc:HGNC:4232]                      | 31  | -2.38 | 0.3926 | -6.1 | 1.2E-09 | 6.0E-09 |
| ENSG00000261786 | ENSG00000261786 | novel transcript                                                                               | 80  | -1.34 | 0.2207 | -6.1 | 1.3E-09 | 6.3E-09 |
| ENSG00000271335 | CCNY-AS1        | CCNY antisense RNA 1 [Source:HGNC Symbol;Acc:HGNC:55252]                                       | 128 | -1.09 | 0.1790 | -6.1 | 1.3E-09 | 6.4E-09 |
| ENSG00000228065 | LINC01515       | long intergenic non-protein coding RNA 1515 [Source:HGNC Symbol;Acc:HGNC:51210]                | 24  | -2.95 | 0.4865 | -6.1 | 1.3E-09 | 6.5E-09 |
| ENSG00000166863 | TAC3            | tachykinin precursor 3 [Source:HGNC Symbol;Acc:HGNC:11521]                                     | 20  | -4.83 | 0.7962 | -6.1 | 1.3E-09 | 6.5E-09 |
| ENSG00000127980 | PEX1            | peroxisomal biogenesis factor 1 [Source:HGNC Symbol;Acc:HGNC:8850]                             | 329 | -0.63 | 0.1032 | -6.1 | 1.4E-09 | 6.6E-09 |
| ENSG00000119772 | DNMT3A          | DNA methyltransferase 3 alpha [Source:HGNC Symbol;Acc:HGNC:2978]                               | 514 | -0.59 | 0.0978 | -6.1 | 1.4E-09 | 6.8E-09 |
| ENSG00000143036 | SLC44A3         | solute carrier family 44 member 3 [Source:HGNC Symbol;Acc:HGNC:28689]                          | 508 | -0.53 | 0.0870 | -6.1 | 1.4E-09 | 6.8E-09 |
| ENSG00000189058 | APOD            | apolipoprotein D [Source:HGNC Symbol;Acc:HGNC:612]                                             | 35  | -2.17 | 0.3589 | -6.0 | 1.5E-09 | 7.0E-09 |
| ENSG00000182134 | TDRKH           | tudor and KH domain containing [Source:HGNC Symbol;Acc:HGNC:11713]                             | 417 | -0.55 | 0.0912 | -6.0 | 1.5E-09 | 7.1E-09 |
| ENSG00000198625 | MDM4            | MDM4 regulator of p53 [Source:HGNC Symbol;Acc:HGNC:6974]                                       | 388 | -0.59 | 0.0971 | -6.0 | 1.5E-09 | 7.2E-09 |
| ENSG00000261578 | ENSG00000261578 | novel transcript, overlapping to TSKU                                                          | 77  | -1.32 | 0.2184 | -6.0 | 1.5E-09 | 7.3E-09 |
| ENSG00000124374 | PAIP2B          | poly(A) binding protein interacting protein 2B [Source:HGNC Symbol;Acc:HGNC:29200]             | 179 | -0.85 | 0.1405 | -6.0 | 1.6E-09 | 7.5E-09 |
| ENSG00000179314 | WSCD1           | WSC domain containing 1 [Source:HGNC Symbol;Acc:HGNC:29060]                                    | 23  | -2.82 | 0.4676 | -6.0 | 1.6E-09 | 7.6E-09 |
| ENSG00000130208 | APOC1           | apolipoprotein C1 [Source:HGNC Symbol;Acc:HGNC:607]                                            | 29  | -2.55 | 0.4221 | -6.0 | 1.6E-09 | 7.8E-09 |
| ENSG00000215114 | UBXN2B          | UBX domain protein 2B [Source:HGNC Symbol;Acc:HGNC:27035]                                      | 311 | -0.63 | 0.1047 | -6.0 | 1.6E-09 | 7.8E-09 |
| ENSG00000262823 | ENSG00000262823 | novel transcript, antisense to SPNS3                                                           | 103 | -1.12 | 0.1863 | -6.0 | 1.7E-09 | 7.9E-09 |
| ENSG00000163563 | MNDA            | myeloid cell nuclear differentiation antigen [Source:HGNC Symbol;Acc:HGNC:7183]                | 22  | -3.02 | 0.5016 | -6.0 | 1.7E-09 | 8.1E-09 |
| ENSG00000147041 | SYTL5           | synaptotagmin like 5 [Source:HGNC Symbol;Acc:HGNC:15589]                                       | 54  | -1.70 | 0.2821 | -6.0 | 1.8E-09 | 8.8E-09 |

|                 |            |                                                                                                 |     |       |        |      |         |         |
|-----------------|------------|-------------------------------------------------------------------------------------------------|-----|-------|--------|------|---------|---------|
| ENSG00000161911 | TREML1     | triggering receptor expressed on myeloid cells like 1 [Source:HGNC Symbol;Acc:HGNC:20434]       | 16  | -7.43 | 1.2360 | -6.0 | 1.8E-09 | 8.8E-09 |
| ENSG00000175832 | ETV4       | ETS variant transcription factor 4 [Source:HGNC Symbol;Acc:HGNC:3493]                           | 227 | -0.78 | 0.1296 | -6.0 | 1.9E-09 | 8.9E-09 |
| ENSG00000286358 | ENSG000002 | novel transcript                                                                                | 16  | -7.43 | 1.2361 | -6.0 | 1.9E-09 | 9.0E-09 |
| ENSG00000274928 | KRT89P     | keratin 89 pseudogene [Source:HGNC Symbol;Acc:HGNC:30196]                                       | 40  | -1.91 | 0.3179 | -6.0 | 1.9E-09 | 9.3E-09 |
| ENSG00000247081 | BAALC-AS1  | BAALC antisense RNA 1 [Source:HGNC Symbol;Acc:HGNC:50461]                                       | 59  | -1.50 | 0.2508 | -6.0 | 2.0E-09 | 9.4E-09 |
| ENSG00000174498 | IGDCC3     | immunoglobulin superfamily DCC subclass member 3 [Source:HGNC Symbol;Acc:HGNC:9700]             | 47  | -1.83 | 0.3044 | -6.0 | 2.0E-09 | 9.5E-09 |
| ENSG00000103742 | IGDCC4     | immunoglobulin superfamily DCC subclass member 4 [Source:HGNC Symbol;Acc:HGNC:13770]            | 37  | -2.01 | 0.3363 | -6.0 | 2.1E-09 | 1.0E-08 |
| ENSG00000251432 | LINC02615  | long intergenic non-protein coding RNA 2615 [Source:HGNC Symbol;Acc:HGNC:53402]                 | 86  | -1.30 | 0.2171 | -6.0 | 2.2E-09 | 1.0E-08 |
| ENSG00000118194 | TNNT2      | troponin T2, cardiac type [Source:HGNC Symbol;Acc:HGNC:11949]                                   | 25  | -2.65 | 0.4432 | -6.0 | 2.3E-09 | 1.1E-08 |
| ENSG00000115507 | OTX1       | orthodenticle homeobox 1 [Source:HGNC Symbol;Acc:HGNC:8521]                                     | 210 | -0.78 | 0.1313 | -6.0 | 2.4E-09 | 1.2E-08 |
| ENSG00000114739 | ACVR2B     | activin A receptor type 2B [Source:HGNC Symbol;Acc:HGNC:174]                                    | 170 | -0.85 | 0.1435 | -5.9 | 2.8E-09 | 1.3E-08 |
| ENSG00000251026 | LINC02163  | long intergenic non-protein coding RNA 2163 [Source:HGNC Symbol;Acc:HGNC:53024]                 | 19  | -4.07 | 0.6845 | -5.9 | 2.8E-09 | 1.3E-08 |
| ENSG00000176225 | RTTN       | rotatin [Source:HGNC Symbol;Acc:HGNC:18654]                                                     | 515 | -0.51 | 0.0858 | -5.9 | 2.8E-09 | 1.3E-08 |
| ENSG00000171236 | LRG1       | leucine rich alpha-2-glycoprotein 1 [Source:HGNC Symbol;Acc:HGNC:29480]                         | 37  | -2.24 | 0.3768 | -5.9 | 2.9E-09 | 1.4E-08 |
| ENSG00000132321 | IQCA1      | IQ motif containing with AAA domain 1 [Source:HGNC Symbol;Acc:HGNC:26195]                       | 137 | -0.97 | 0.1629 | -5.9 | 2.9E-09 | 1.4E-08 |
| ENSG00000266208 | ENSG000002 | novel transcript, antisense to GJD3                                                             | 168 | -0.85 | 0.1430 | -5.9 | 3.0E-09 | 1.4E-08 |
| ENSG00000179630 | LACC1      | laccase domain containing 1 [Source:HGNC Symbol;Acc:HGNC:26789]                                 | 87  | -1.34 | 0.2254 | -5.9 | 3.0E-09 | 1.4E-08 |
| ENSG00000283098 | ENSG000002 | novel transcript                                                                                | 25  | -2.61 | 0.4406 | -5.9 | 3.0E-09 | 1.4E-08 |
| ENSG00000228903 | RASA4CP    | RAS p21 protein activator 4C, pseudogene [Source:HGNC Symbol;Acc:HGNC:44185]                    | 25  | -2.63 | 0.4447 | -5.9 | 3.2E-09 | 1.5E-08 |
| ENSG0000023902  | PLEKHO1    | pleckstrin homology domain containing O1 [Source:HGNC Symbol;Acc:HGNC:24310]                    | 99  | -1.15 | 0.1948 | -5.9 | 3.2E-09 | 1.5E-08 |
| ENSG00000187678 | SPRY4      | sprouty RTK signaling antagonist 4 [Source:HGNC Symbol;Acc:HGNC:15533]                          | 240 | -0.71 | 0.1207 | -5.9 | 3.3E-09 | 1.5E-08 |
| NA              | 23         | NA                                                                                              | 104 | -1.14 | 0.1924 | -5.9 | 3.3E-09 | 1.6E-08 |
| ENSG00000188001 | TPRG1      | tumor protein p63 regulated 1 [Source:HGNC Symbol;Acc:HGNC:24759]                               | 31  | -2.31 | 0.3921 | -5.9 | 3.6E-09 | 1.7E-08 |
| ENSG00000140459 | CYP11A1    | cytochrome P450 family 11 subfamily A member 1 [Source:HGNC Symbol;Acc:HGNC:2590]               | 27  | -7.17 | 1.2174 | -5.9 | 3.8E-09 | 1.8E-08 |
| ENSG00000163704 | PRRT3      | proline rich transmembrane protein 3 [Source:HGNC Symbol;Acc:HGNC:26591]                        | 148 | -0.91 | 0.1539 | -5.9 | 3.9E-09 | 1.8E-08 |
| ENSG00000166869 | CHP2       | calcineurin like EF-hand protein 2 [Source:HGNC Symbol;Acc:HGNC:24927]                          | 19  | -4.76 | 0.8080 | -5.9 | 3.9E-09 | 1.8E-08 |
| ENSG00000174827 | PDZK1      | PDZ domain containing 1 [Source:HGNC Symbol;Acc:HGNC:8821]                                      | 41  | -1.82 | 0.3090 | -5.9 | 4.0E-09 | 1.9E-08 |
| ENSG00000182118 | FAM89A     | family with sequence similarity 89 member A [Source:HGNC Symbol;Acc:HGNC:25057]                 | 126 | -1.01 | 0.1715 | -5.9 | 4.0E-09 | 1.9E-08 |
| ENSG00000139915 | MDGA2      | MAM domain containing glycosylphosphatidylinositol anchor 2 [Source:HGNC Symbol;Acc:HGNC:19835] | 21  | -5.29 | 0.8989 | -5.9 | 4.1E-09 | 1.9E-08 |
| ENSG00000250320 | EDIL3-DT   | EDIL3 divergent transcript [Source:HGNC Symbol;Acc:HGNC:40204]                                  | 15  | -7.32 | 1.2453 | -5.9 | 4.1E-09 | 1.9E-08 |
| ENSG00000187398 | LUZP2      | leucine zipper protein 2 [Source:HGNC Symbol;Acc:HGNC:23206]                                    | 18  | -3.84 | 0.6538 | -5.9 | 4.1E-09 | 1.9E-08 |
| ENSG00000068615 | REEP1      | receptor accessory protein 1 [Source:HGNC Symbol;Acc:HGNC:25786]                                | 26  | -2.50 | 0.4245 | -5.9 | 4.2E-09 | 1.9E-08 |
| ENSG00000130856 | ZNF236     | zinc finger protein 236 [Source:HGNC Symbol;Acc:HGNC:13028]                                     | 339 | -0.68 | 0.1155 | -5.9 | 4.2E-09 | 2.0E-08 |
| ENSG00000139266 | MARCHF9    | membrane associated ring-CH-type finger 9 [Source:HGNC Symbol;Acc:HGNC:25139]                   | 210 | -0.85 | 0.1447 | -5.9 | 4.4E-09 | 2.1E-08 |
| ENSG00000151150 | ANK3       | ankyrin 3 [Source:HGNC Symbol;Acc:HGNC:494]                                                     | 464 | -0.53 | 0.0909 | -5.9 | 4.5E-09 | 2.1E-08 |
| ENSG0000015153  | YAF2       | YY1 associated factor 2 [Source:HGNC Symbol;Acc:HGNC:17363]                                     | 283 | -0.64 | 0.1100 | -5.9 | 4.5E-09 | 2.1E-08 |
| ENSG00000109819 | PPARGC1A   | PPARG coactivator 1 alpha [Source:HGNC Symbol;Acc:HGNC:9237]                                    | 26  | -7.13 | 1.2155 | -5.9 | 4.6E-09 | 2.1E-08 |
| ENSG00000164100 | NDST3      | N-deacetylase and N-sulfotransferase 3 [Source:HGNC Symbol;Acc:HGNC:7682]                       | 20  | -5.27 | 0.8998 | -5.9 | 4.6E-09 | 2.1E-08 |
| ENSG00000163393 | SLC22A15   | solute carrier family 22 member 15 [Source:HGNC Symbol;Acc:HGNC:20301]                          | 199 | -0.79 | 0.1348 | -5.9 | 4.6E-09 | 2.2E-08 |
| ENSG00000249816 | LINC00964  | long intergenic non-protein coding RNA 964 [Source:HGNC Symbol;Acc:HGNC:27226]                  | 19  | -3.73 | 0.6367 | -5.9 | 4.7E-09 | 2.2E-08 |
| ENSG00000182782 | HCAR2      | hydroxycarboxylic acid receptor 2 [Source:HGNC Symbol;Acc:HGNC:24827]                           | 70  | -1.40 | 0.2386 | -5.9 | 4.7E-09 | 2.2E-08 |
| ENSG00000277013 | ENSG000002 | novel transcript                                                                                | 351 | -0.64 | 0.1087 | -5.9 | 4.7E-09 | 2.2E-08 |

|                 |                 |                                                                                                  |      |       |        |      |         |         |
|-----------------|-----------------|--------------------------------------------------------------------------------------------------|------|-------|--------|------|---------|---------|
| ENSG00000175697 | GPR156          | G protein-coupled receptor 156 [Source:HGNC Symbol;Acc:HGNC:20844]                               | 67   | -1.37 | 0.2338 | -5.9 | 4.8E-09 | 2.2E-08 |
| ENSG00000152580 | IGSF10          | immunoglobulin superfamily member 10 [Source:HGNC Symbol;Acc:HGNC:26384]                         | 19   | -4.70 | 0.8025 | -5.9 | 4.8E-09 | 2.2E-08 |
| ENSG00000250986 | LINC02600       | long intergenic non-protein coding RNA 2600 [Source:HGNC Symbol;Acc:HGNC:53177]                  | 40   | -1.98 | 0.3390 | -5.9 | 4.9E-09 | 2.3E-08 |
| ENSG00000227121 | LINC02672       | long intergenic non-protein coding RNA 2672 [Source:HGNC Symbol;Acc:HGNC:54159]                  | 15   | -7.28 | 1.2436 | -5.9 | 4.9E-09 | 2.3E-08 |
| ENSG00000066336 | SPI1            | Spi-1 proto-oncogene [Source:HGNC Symbol;Acc:HGNC:11241]                                         | 43   | -1.82 | 0.3110 | -5.8 | 4.9E-09 | 2.3E-08 |
| ENSG00000139714 | MORN3           | MORN repeat containing 3 [Source:HGNC Symbol;Acc:HGNC:29807]                                     | 41   | -1.80 | 0.3081 | -5.8 | 5.0E-09 | 2.3E-08 |
| ENSG00000167912 | ENSG00000167912 | novel transcript                                                                                 | 18   | -3.62 | 0.6197 | -5.8 | 5.0E-09 | 2.3E-08 |
| ENSG00000144401 | METTL21A        | methyltransferase like 21A [Source:HGNC Symbol;Acc:HGNC:30476]                                   | 467  | -0.51 | 0.0880 | -5.8 | 5.0E-09 | 2.3E-08 |
| ENSG00000272568 | ENSG00000272568 | novel transcript, antisense to CPVL                                                              | 15   | -7.27 | 1.2452 | -5.8 | 5.3E-09 | 2.5E-08 |
| ENSG00000203783 | PRR9            | proline rich 9 [Source:HGNC Symbol;Acc:HGNC:32057]                                               | 15   | -7.27 | 1.2463 | -5.8 | 5.5E-09 | 2.5E-08 |
| ENSG00000118096 | IFT46           | intraflagellar transport 46 [Source:HGNC Symbol;Acc:HGNC:26146]                                  | 357  | -0.59 | 0.1011 | -5.8 | 5.5E-09 | 2.6E-08 |
| ENSG00000222033 | LINC01124       | long intergenic non-protein coding RNA 1124 [Source:HGNC Symbol;Acc:HGNC:49270]                  | 28   | -2.32 | 0.3979 | -5.8 | 5.6E-09 | 2.6E-08 |
| ENSG00000157551 | KCNJ15          | potassium inwardly rectifying channel subfamily J member 15 [Source:HGNC Symbol;Acc:HGNC:6261]   | 38   | -1.92 | 0.3301 | -5.8 | 5.7E-09 | 2.6E-08 |
| ENSG00000123096 | SSPN            | sarcospan [Source:HGNC Symbol;Acc:HGNC:11322]                                                    | 87   | -1.16 | 0.1997 | -5.8 | 5.7E-09 | 2.6E-08 |
| ENSG00000149212 | SESN3           | sestrin 3 [Source:HGNC Symbol;Acc:HGNC:23060]                                                    | 34   | -2.03 | 0.3496 | -5.8 | 6.0E-09 | 2.8E-08 |
| ENSG00000167207 | NOD2            | nucleotide binding oligomerization domain containing 2 [Source:HGNC Symbol;Acc:HGNC:5331]        | 47   | -1.71 | 0.2948 | -5.8 | 6.1E-09 | 2.8E-08 |
| ENSG00000165591 | FAAH2           | fatty acid amide hydrolase 2 [Source:HGNC Symbol;Acc:HGNC:26440]                                 | 18   | -3.65 | 0.6273 | -5.8 | 6.2E-09 | 2.8E-08 |
| ENSG00000085741 | WNT11           | Wnt family member 11 [Source:HGNC Symbol;Acc:HGNC:12776]                                         | 45   | -1.70 | 0.2922 | -5.8 | 6.3E-09 | 2.9E-08 |
| ENSG00000250899 | ENSG00000250899 | novel transcript                                                                                 | 305  | -0.63 | 0.1091 | -5.8 | 6.3E-09 | 2.9E-08 |
| ENSG00000100092 | SH3BP1          | SH3 domain binding protein 1 [Source:HGNC Symbol;Acc:HGNC:10824]                                 | 97   | -1.12 | 0.1934 | -5.8 | 6.4E-09 | 3.0E-08 |
| ENSG00000197043 | ANXA6           | annexin A6 [Source:HGNC Symbol;Acc:HGNC:544]                                                     | 134  | -0.93 | 0.1603 | -5.8 | 6.4E-09 | 3.0E-08 |
| ENSG00000135929 | CYP27A1         | cytochrome P450 family 27 subfamily A member 1 [Source:HGNC Symbol;Acc:HGNC:2605]                | 63   | -1.51 | 0.2596 | -5.8 | 6.6E-09 | 3.0E-08 |
| ENSG00000121966 | CXCR4           | C-X-C motif chemokine receptor 4 [Source:HGNC Symbol;Acc:HGNC:2561]                              | 62   | -1.48 | 0.2548 | -5.8 | 6.7E-09 | 3.1E-08 |
| ENSG00000119283 | TRIM67          | tripartite motif containing 67 [Source:HGNC Symbol;Acc:HGNC:31859]                               | 19   | -4.12 | 0.7113 | -5.8 | 6.8E-09 | 3.1E-08 |
| ENSG00000043591 | ADRB1           | adrenoceptor beta 1 [Source:HGNC Symbol;Acc:HGNC:285]                                            | 102  | -1.09 | 0.1886 | -5.8 | 6.8E-09 | 3.1E-08 |
| ENSG00000214694 | ARHGEF33        | Rho guanine nucleotide exchange factor 33 [Source:HGNC Symbol;Acc:HGNC:37252]                    | 18   | -4.00 | 0.6910 | -5.8 | 6.8E-09 | 3.1E-08 |
| ENSG00000187049 | TMEM216         | transmembrane protein 216 [Source:HGNC Symbol;Acc:HGNC:25018]                                    | 262  | -0.69 | 0.1192 | -5.8 | 7.4E-09 | 3.4E-08 |
| ENSG00000229272 | ENSG00000229272 | novel transcript                                                                                 | 18   | -4.65 | 0.8052 | -5.8 | 7.7E-09 | 3.5E-08 |
| ENSG00000198894 | CIPC            | CLOCK interacting pacemaker [Source:HGNC Symbol;Acc:HGNC:20365]                                  | 318  | -0.60 | 0.1047 | -5.8 | 8.0E-09 | 3.7E-08 |
| ENSG00000108932 | SLC16A6         | solute carrier family 16 member 6 [Source:HGNC Symbol;Acc:HGNC:10927]                            | 52   | -1.64 | 0.2838 | -5.8 | 8.1E-09 | 3.7E-08 |
| ENSG00000043462 | LCP2            | lymphocyte cytosolic protein 2 [Source:HGNC Symbol;Acc:HGNC:6529]                                | 26   | -2.43 | 0.4216 | -5.8 | 8.3E-09 | 3.8E-08 |
| ENSG00000130202 | NECTIN2         | nectin cell adhesion molecule 2 [Source:HGNC Symbol;Acc:HGNC:9707]                               | 2776 | -0.54 | 0.0933 | -5.8 | 8.5E-09 | 3.9E-08 |
| ENSG00000152766 | ANKRD22         | ankyrin repeat domain 22 [Source:HGNC Symbol;Acc:HGNC:28321]                                     | 150  | -0.90 | 0.1556 | -5.8 | 8.5E-09 | 3.9E-08 |
| ENSG00000166860 | ZBTB39          | zinc finger and BTB domain containing 39 [Source:HGNC Symbol;Acc:HGNC:29014]                     | 382  | -0.55 | 0.0964 | -5.8 | 8.9E-09 | 4.1E-08 |
| ENSG00000154040 | CABYR           | calcium binding tyrosine phosphorylation regulated [Source:HGNC Symbol;Acc:HGNC:15569]           | 86   | -1.23 | 0.2139 | -5.7 | 9.0E-09 | 4.1E-08 |
| ENSG00000174992 | ZG16            | zymogen granule protein 16 [Source:HGNC Symbol;Acc:HGNC:30961]                                   | 36   | -2.05 | 0.3560 | -5.7 | 9.2E-09 | 4.2E-08 |
| ENSG00000211891 | IGHE            | immunoglobulin heavy constant epsilon [Source:HGNC Symbol;Acc:HGNC:5522]                         | 28   | -2.26 | 0.3932 | -5.7 | 9.2E-09 | 4.2E-08 |
| ENSG00000111261 | MANSC1          | MANSC domain containing 1 [Source:HGNC Symbol;Acc:HGNC:25505]                                    | 77   | -1.29 | 0.2252 | -5.7 | 9.5E-09 | 4.3E-08 |
| ENSG00000232527 | LINC02802       | long intergenic non-protein coding RNA 2802 [Source:HGNC Symbol;Acc:HGNC:54326]                  | 29   | -2.32 | 0.4037 | -5.7 | 9.7E-09 | 4.4E-08 |
| ENSG00000146243 | IRAK1BP1        | interleukin 1 receptor associated kinase 1 binding protein 1 [Source:HGNC Symbol;Acc:HGNC:17368] | 33   | -2.05 | 0.3573 | -5.7 | 1.0E-08 | 4.7E-08 |
| ENSG00000118707 | TGIF2           | TGFB induced factor homeobox 2 [Source:HGNC Symbol;Acc:HGNC:15764]                               | 281  | -0.64 | 0.1116 | -5.7 | 1.0E-08 | 4.7E-08 |
| ENSG00000016391 | CHDH            | choline dehydrogenase [Source:HGNC Symbol;Acc:HGNC:24288]                                        | 144  | -0.89 | 0.1555 | -5.7 | 1.1E-08 | 4.8E-08 |

|                 |                 |                                                                                        |     |       |        |      |         |         |
|-----------------|-----------------|----------------------------------------------------------------------------------------|-----|-------|--------|------|---------|---------|
| ENSG00000153233 | PTPRR           | protein tyrosine phosphatase receptor type R [Source:HGNC Symbol;Acc:HGNC:9680]        | 39  | -1.92 | 0.3358 | -5.7 | 1.1E-08 | 4.8E-08 |
| ENSG00000100121 | GGTLC2          | gamma-glutamyltransferase light chain 2 [Source:HGNC Symbol;Acc:HGNC:18596]            | 24  | -6.09 | 1.0650 | -5.7 | 1.1E-08 | 4.9E-08 |
| ENSG00000115598 | IL1RL2          | interleukin 1 receptor like 2 [Source:HGNC Symbol;Acc:HGNC:5999]                       | 131 | -0.96 | 0.1676 | -5.7 | 1.1E-08 | 4.9E-08 |
| ENSG00000100889 | PCK2            | phosphoenolpyruvate carboxykinase 2, mitochondrial [Source:HGNC Symbol;Acc:HGNC:8725]  | 320 | -0.64 | 0.1113 | -5.7 | 1.1E-08 | 5.0E-08 |
| ENSG00000203724 | C1orf53         | chromosome 1 open reading frame 53 [Source:HGNC Symbol;Acc:HGNC:30003]                 | 153 | -0.90 | 0.1569 | -5.7 | 1.2E-08 | 5.2E-08 |
| ENSG00000182957 | SPATA13         | spermatogenesis associated 13 [Source:HGNC Symbol;Acc:HGNC:23222]                      | 139 | -0.94 | 0.1639 | -5.7 | 1.2E-08 | 5.3E-08 |
| ENSG00000152689 | RASGRP3         | RAS guanyl releasing protein 3 [Source:HGNC Symbol;Acc:HGNC:14545]                     | 38  | -1.87 | 0.3283 | -5.7 | 1.2E-08 | 5.3E-08 |
| ENSG00000179277 | MEIS3P1         | Meis homeobox 3 pseudogene 1 [Source:HGNC Symbol;Acc:HGNC:7002]                        | 89  | -1.15 | 0.2023 | -5.7 | 1.2E-08 | 5.4E-08 |
| ENSG00000146151 | HMGCLL1         | 3-hydroxymethyl-3-methylglutaryl-CoA lyase like 1 [Source:HGNC Symbol;Acc:HGNC:21359]  | 20  | -3.21 | 0.5630 | -5.7 | 1.2E-08 | 5.6E-08 |
| ENSG00000011600 | TYROBP          | transmembrane immune signaling adaptor TYROBP [Source:HGNC Symbol;Acc:HGNC:12449]      | 85  | -2.42 | 0.4254 | -5.7 | 1.3E-08 | 5.9E-08 |
| ENSG00000184012 | TMPRSS2         | transmembrane serine protease 2 [Source:HGNC Symbol;Acc:HGNC:11876]                    | 93  | -1.13 | 0.1991 | -5.7 | 1.3E-08 | 5.9E-08 |
| ENSG00000145088 | EAF2            | ELL associated factor 2 [Source:HGNC Symbol;Acc:HGNC:23115]                            | 73  | -1.29 | 0.2274 | -5.7 | 1.3E-08 | 6.0E-08 |
| ENSG00000126217 | MCF2L           | MCF.2 cell line derived transforming sequence like [Source:HGNC Symbol;Acc:HGNC:14576] | 38  | -1.86 | 0.3286 | -5.7 | 1.4E-08 | 6.3E-08 |
| ENSG00000105419 | MEIS3           | Meis homeobox 3 [Source:HGNC Symbol;Acc:HGNC:29537]                                    | 561 | -0.50 | 0.0889 | -5.7 | 1.4E-08 | 6.3E-08 |
| ENSG00000198673 | TAFA2           | TAFA chemokine like family member 2 [Source:HGNC Symbol;Acc:HGNC:21589]                | 28  | -2.36 | 0.4158 | -5.7 | 1.4E-08 | 6.4E-08 |
| ENSG00000276855 | ENSG00000276855 | novel transcript                                                                       | 62  | -1.43 | 0.2522 | -5.7 | 1.4E-08 | 6.4E-08 |
| ENSG00000148408 | CACNA1B         | calcium voltage-gated channel subunit alpha1 B [Source:HGNC Symbol;Acc:HGNC:1389]      | 17  | -3.98 | 0.7038 | -5.7 | 1.5E-08 | 6.9E-08 |
| ENSG00000170464 | DNAJC18         | DnaJ heat shock protein family (Hsp40) member C18 [Source:HGNC Symbol;Acc:HGNC:28429]  | 126 | -0.93 | 0.1652 | -5.7 | 1.5E-08 | 6.9E-08 |
| ENSG00000127252 | PLAAT1          | phospholipase A and acyltransferase 1 [Source:HGNC Symbol;Acc:HGNC:14922]              | 21  | -3.01 | 0.5324 | -5.7 | 1.6E-08 | 6.9E-08 |
| ENSG00000257176 | ENSG00000257176 | novel transcript, antisense to FAR2                                                    | 36  | -2.02 | 0.3574 | -5.6 | 1.7E-08 | 7.4E-08 |
| ENSG00000165140 | FBP1            | fructose-bisphosphatase 1 [Source:HGNC Symbol;Acc:HGNC:3606]                           | 17  | -4.21 | 0.7462 | -5.6 | 1.7E-08 | 7.6E-08 |
| ENSG00000197594 | ENPP1           | ectonucleotide pyrophosphatase/phosphodiesterase 1 [Source:HGNC Symbol;Acc:HGNC:3356]  | 238 | -0.70 | 0.1235 | -5.6 | 1.7E-08 | 7.7E-08 |
| ENSG00000134049 | IER3IP1         | immediate early response 3 interacting protein 1 [Source:HGNC Symbol;Acc:HGNC:18550]   | 372 | -0.57 | 0.1015 | -5.6 | 1.7E-08 | 7.7E-08 |
| ENSG00000151338 | MIPOL1          | mirror-image polydactyly 1 [Source:HGNC Symbol;Acc:HGNC:21460]                         | 137 | -0.90 | 0.1600 | -5.6 | 1.8E-08 | 7.8E-08 |
| ENSG00000129538 | RNASE1          | ribonuclease A family member 1, pancreatic [Source:HGNC Symbol;Acc:HGNC:10044]         | 179 | -2.84 | 0.5046 | -5.6 | 1.8E-08 | 8.1E-08 |
| ENSG00000284309 | ENSG00000284309 | novel transcript                                                                       | 13  | -7.07 | 1.2577 | -5.6 | 1.9E-08 | 8.4E-08 |
| ENSG00000133812 | SBF2            | SET binding factor 2 [Source:HGNC Symbol;Acc:HGNC:2135]                                | 370 | -0.55 | 0.0983 | -5.6 | 1.9E-08 | 8.5E-08 |
| ENSG00000034239 | EFCAB1          | EF-hand calcium binding domain 1 [Source:HGNC Symbol;Acc:HGNC:25678]                   | 13  | -7.06 | 1.2563 | -5.6 | 1.9E-08 | 8.5E-08 |
| ENSG00000271474 | UNC5C-AS1       | UNC5C antisense RNA 1 [Source:HGNC Symbol;Acc:HGNC:55246]                              | 32  | -2.12 | 0.3773 | -5.6 | 1.9E-08 | 8.5E-08 |
| ENSG00000251442 | LINC01094       | long intergenic non-protein coding RNA 1094 [Source:HGNC Symbol;Acc:HGNC:49219]        | 70  | -1.32 | 0.2355 | -5.6 | 1.9E-08 | 8.6E-08 |
| ENSG00000233124 | LINC00456       | long intergenic non-protein coding RNA 456 [Source:HGNC Symbol;Acc:HGNC:42804]         | 18  | -3.26 | 0.5809 | -5.6 | 2.0E-08 | 8.7E-08 |
| ENSG00000261770 | ENSG00000261770 | novel transcript                                                                       | 60  | -1.43 | 0.2544 | -5.6 | 2.0E-08 | 8.7E-08 |
| ENSG00000165905 | LARGE2          | LARGE xylosyl- and glucuronyltransferase 2 [Source:HGNC Symbol;Acc:HGNC:16522]         | 66  | -1.34 | 0.2387 | -5.6 | 2.0E-08 | 8.8E-08 |
| ENSG00000171533 | MAP6            | microtubule associated protein 6 [Source:HGNC Symbol;Acc:HGNC:6868]                    | 25  | -2.44 | 0.4356 | -5.6 | 2.2E-08 | 9.7E-08 |
| ENSG00000228626 | ENSG00000228626 | novel pseudogene                                                                       | 23  | -2.57 | 0.4591 | -5.6 | 2.2E-08 | 9.7E-08 |
| ENSG00000139174 | PRICKLE1        | prickle planar cell polarity protein 1 [Source:HGNC Symbol;Acc:HGNC:17019]             | 120 | -0.95 | 0.1691 | -5.6 | 2.2E-08 | 9.8E-08 |
| ENSG00000260265 | LINC02562       | long intergenic non-protein coding RNA 2562 [Source:HGNC Symbol;Acc:HGNC:53602]        | 19  | -3.14 | 0.5615 | -5.6 | 2.3E-08 | 1.0E-07 |
| ENSG00000118971 | CCND2           | cyclin D2 [Source:HGNC Symbol;Acc:HGNC:1583]                                           | 32  | -2.11 | 0.3771 | -5.6 | 2.3E-08 | 1.0E-07 |
| ENSG00000182575 | NXP3            | neurexophilin 3 [Source:HGNC Symbol;Acc:HGNC:8077]                                     | 179 | -0.78 | 0.1398 | -5.6 | 2.4E-08 | 1.1E-07 |
| ENSG00000254535 | PABPC4L         | poly(A) binding protein cytoplasmic 4 like [Source:HGNC Symbol;Acc:HGNC:31955]         | 21  | -6.84 | 1.2271 | -5.6 | 2.5E-08 | 1.1E-07 |
| ENSG00000089116 | LHX5            | LIM homeobox 5 [Source:HGNC Symbol;Acc:HGNC:14216]                                     | 21  | -2.72 | 0.4885 | -5.6 | 2.5E-08 | 1.1E-07 |
| ENSG00000024862 | CCDC28A         | coiled-coil domain containing 28A [Source:HGNC Symbol;Acc:HGNC:21098]                  | 178 | -0.80 | 0.1431 | -5.6 | 2.5E-08 | 1.1E-07 |

|                 |            |                                                                                                    |      |       |        |      |         |         |
|-----------------|------------|----------------------------------------------------------------------------------------------------|------|-------|--------|------|---------|---------|
| ENSG00000138756 | BMP2K      | BMP2 inducible kinase [Source:HGNC Symbol;Acc:HGNC:18041]                                          | 330  | -0.58 | 0.1050 | -5.6 | 2.6E-08 | 1.1E-07 |
| ENSG00000158517 | NCF1       | neutrophil cytosolic factor 1 [Source:HGNC Symbol;Acc:HGNC:7660]                                   | 147  | -2.35 | 0.4234 | -5.6 | 2.7E-08 | 1.2E-07 |
| ENSG00000205903 | ZNF316     | zinc finger protein 316 [Source:HGNC Symbol;Acc:HGNC:13843]                                        | 1642 | -0.56 | 0.1003 | -5.6 | 2.7E-08 | 1.2E-07 |
| ENSG00000153064 | BANK1      | B cell scaffold protein with ankyrin repeats 1 [Source:HGNC Symbol;Acc:HGNC:18233]                 | 139  | -0.92 | 0.1652 | -5.6 | 2.8E-08 | 1.2E-07 |
| ENSG00000215039 | CD27-AS1   | CD27 antisense RNA 1 [Source:HGNC Symbol;Acc:HGNC:43896]                                           | 81   | -1.19 | 0.2134 | -5.6 | 2.8E-08 | 1.2E-07 |
| ENSG00000152049 | KCNE4      | potassium voltage-gated channel subfamily E regulatory subunit 4 [Source:HGNC Symbol;Acc:HGNC:624] | 26   | -2.49 | 0.4486 | -5.6 | 2.8E-08 | 1.2E-07 |
| ENSG0000049089  | COL9A2     | collagen type IX alpha 2 chain [Source:HGNC Symbol;Acc:HGNC:2218]                                  | 51   | -1.65 | 0.2969 | -5.5 | 2.9E-08 | 1.3E-07 |
| ENSG00000286970 | ENSG000002 | novel transcript, antisense to ANKH                                                                | 19   | -2.93 | 0.5295 | -5.5 | 3.0E-08 | 1.3E-07 |
| ENSG00000147251 | DOCK11     | dedicator of cytokinesis 11 [Source:HGNC Symbol;Acc:HGNC:23483]                                    | 134  | -0.99 | 0.1797 | -5.5 | 3.1E-08 | 1.4E-07 |
| ENSG00000187474 | FPR3       | formyl peptide receptor 3 [Source:HGNC Symbol;Acc:HGNC:3828]                                       | 19   | -3.03 | 0.5478 | -5.5 | 3.2E-08 | 1.4E-07 |
| ENSG00000021300 | PLEKHB1    | pleckstrin homology domain containing B1 [Source:HGNC Symbol;Acc:HGNC:19079]                       | 28   | -2.15 | 0.3897 | -5.5 | 3.2E-08 | 1.4E-07 |
| ENSG00000169291 | SHE        | Src homology 2 domain containing E [Source:HGNC Symbol;Acc:HGNC:27004]                             | 22   | -2.69 | 0.4865 | -5.5 | 3.3E-08 | 1.4E-07 |
| ENSG00000119535 | CSF3R      | colony stimulating factor 3 receptor [Source:HGNC Symbol;Acc:HGNC:2439]                            | 35   | -1.96 | 0.3555 | -5.5 | 3.4E-08 | 1.5E-07 |
| ENSG00000149809 | TM7SF2     | transmembrane 7 superfamily member 2 [Source:HGNC Symbol;Acc:HGNC:11863]                           | 131  | -0.94 | 0.1696 | -5.5 | 3.4E-08 | 1.5E-07 |
| ENSG00000124212 | PTGIS      | prostaglandin I2 synthase [Source:HGNC Symbol;Acc:HGNC:9603]                                       | 42   | -1.74 | 0.3156 | -5.5 | 3.6E-08 | 1.6E-07 |
| ENSG00000188559 | RALGAPA2   | Ral GTPase activating protein catalytic subunit alpha 2 [Source:HGNC Symbol;Acc:HGNC:16207]        | 257  | -0.65 | 0.1174 | -5.5 | 3.8E-08 | 1.7E-07 |
| ENSG00000152953 | STK32B     | serine/threonine kinase 32B [Source:HGNC Symbol;Acc:HGNC:14217]                                    | 97   | -1.07 | 0.1948 | -5.5 | 3.9E-08 | 1.7E-07 |
| ENSG00000056736 | IL17RB     | interleukin 17 receptor B [Source:HGNC Symbol;Acc:HGNC:18015]                                      | 101  | -1.15 | 0.2101 | -5.5 | 3.9E-08 | 1.7E-07 |
| ENSG00000101928 | MOSPD1     | motile sperm domain containing 1 [Source:HGNC Symbol;Acc:HGNC:25235]                               | 465  | -0.50 | 0.0913 | -5.5 | 4.0E-08 | 1.7E-07 |
| ENSG00000079385 | CEACAM1    | CEA cell adhesion molecule 1 [Source:HGNC Symbol;Acc:HGNC:1814]                                    | 343  | -0.58 | 0.1060 | -5.5 | 4.1E-08 | 1.8E-07 |
| ENSG00000206432 | TMEM200C   | transmembrane protein 200C [Source:HGNC Symbol;Acc:HGNC:37208]                                     | 17   | -4.99 | 0.9106 | -5.5 | 4.2E-08 | 1.8E-07 |
| ENSG00000146426 | TIAM2      | TIAM Rac1 associated GEF 2 [Source:HGNC Symbol;Acc:HGNC:11806]                                     | 277  | -0.63 | 0.1152 | -5.5 | 4.2E-08 | 1.8E-07 |
| ENSG00000164331 | ANKRA2     | ankyrin repeat family A member 2 [Source:HGNC Symbol;Acc:HGNC:13208]                               | 173  | -0.80 | 0.1464 | -5.5 | 4.3E-08 | 1.9E-07 |
| ENSG00000251218 | ENSG000002 | novel transcript                                                                                   | 12   | -6.92 | 1.2634 | -5.5 | 4.4E-08 | 1.9E-07 |
| ENSG00000005812 | FBXL3      | F-box and leucine rich repeat protein 3 [Source:HGNC Symbol;Acc:HGNC:13599]                        | 316  | -0.57 | 0.1048 | -5.5 | 4.4E-08 | 1.9E-07 |
| ENSG00000237330 | RNF223     | ring finger protein 223 [Source:HGNC Symbol;Acc:HGNC:40020]                                        | 322  | -0.59 | 0.1075 | -5.5 | 4.5E-08 | 1.9E-07 |
| ENSG00000198435 | NRARP      | NOTCH regulated ankyrin repeat protein [Source:HGNC Symbol;Acc:HGNC:33843]                         | 84   | -1.19 | 0.2171 | -5.5 | 4.5E-08 | 1.9E-07 |
| ENSG00000122122 | SASH3      | SAM and SH3 domain containing 3 [Source:HGNC Symbol;Acc:HGNC:15975]                                | 22   | -2.48 | 0.4528 | -5.5 | 4.5E-08 | 2.0E-07 |
| ENSG00000286786 | ENSG000002 | novel transcript, antisense to RASGRP1                                                             | 17   | -5.04 | 0.9212 | -5.5 | 4.6E-08 | 2.0E-07 |
| ENSG00000120925 | RNF170     | ring finger protein 170 [Source:HGNC Symbol;Acc:HGNC:25358]                                        | 237  | -0.66 | 0.1204 | -5.5 | 4.6E-08 | 2.0E-07 |
| ENSG00000145103 | ILDR1      | immunoglobulin like domain containing receptor 1 [Source:HGNC Symbol;Acc:HGNC:28741]               | 20   | -6.72 | 1.2289 | -5.5 | 4.6E-08 | 2.0E-07 |
| ENSG00000177108 | ZDHHC22    | zinc finger DHHC-type palmitoyltransferase 22 [Source:HGNC Symbol;Acc:HGNC:20106]                  | 46   | -1.55 | 0.2833 | -5.5 | 4.8E-08 | 2.1E-07 |
| ENSG00000226965 | ENSG000002 | novel transcript                                                                                   | 19   | -6.70 | 1.2294 | -5.4 | 5.1E-08 | 2.2E-07 |
| ENSG00000154736 | ADAMTS5    | ADAM metallopeptidase with thrombospondin type 1 motif 5 [Source:HGNC Symbol;Acc:HGNC:221]         | 19   | -6.69 | 1.2278 | -5.4 | 5.2E-08 | 2.2E-07 |
| ENSG00000153956 | CACNA2D1   | calcium voltage-gated channel auxiliary subunit alpha2delta 1 [Source:HGNC Symbol;Acc:HGNC:1399]   | 17   | -3.47 | 0.6376 | -5.4 | 5.3E-08 | 2.3E-07 |
| ENSG00000233718 | MYCNOS     | MYCN opposite strand [Source:HGNC Symbol;Acc:HGNC:16911]                                           | 11   | -6.86 | 1.2626 | -5.4 | 5.4E-08 | 2.3E-07 |
| ENSG00000183032 | SLC25A21   | solute carrier family 25 member 21 [Source:HGNC Symbol;Acc:HGNC:14411]                             | 29   | -2.12 | 0.3905 | -5.4 | 5.6E-08 | 2.4E-07 |
| ENSG00000182326 | C1S        | complement C1s [Source:HGNC Symbol;Acc:HGNC:1247]                                                  | 55   | -1.48 | 0.2734 | -5.4 | 5.7E-08 | 2.4E-07 |
| ENSG00000155957 | TMBIM4     | transmembrane BAX inhibitor motif containing 4 [Source:HGNC Symbol;Acc:HGNC:24257]                 | 182  | -0.78 | 0.1445 | -5.4 | 5.7E-08 | 2.4E-07 |
| ENSG00000136689 | IL1RN      | interleukin 1 receptor antagonist [Source:HGNC Symbol;Acc:HGNC:6000]                               | 26   | -2.22 | 0.4095 | -5.4 | 5.7E-08 | 2.4E-07 |
| ENSG00000186487 | MYT1L      | myelin transcription factor 1 like [Source:HGNC Symbol;Acc:HGNC:7623]                              | 11   | -6.87 | 1.2667 | -5.4 | 5.8E-08 | 2.5E-07 |
| ENSG00000171450 | CDK5R2     | cyclin dependent kinase 5 regulatory subunit 2 [Source:HGNC Symbol;Acc:HGNC:1776]                  | 57   | -1.43 | 0.2646 | -5.4 | 6.0E-08 | 2.6E-07 |

|                 |            |                                                                                               |     |       |        |      |         |         |
|-----------------|------------|-----------------------------------------------------------------------------------------------|-----|-------|--------|------|---------|---------|
| ENSG00000149043 | SYT8       | synaptotagmin 8 [Source:HGNC Symbol;Acc:HGNC:19264]                                           | 76  | -1.17 | 0.2171 | -5.4 | 6.3E-08 | 2.7E-07 |
| ENSG00000259953 | ENSG000002 | novel transcript, overlapping SUSD1                                                           | 57  | -1.43 | 0.2649 | -5.4 | 6.5E-08 | 2.8E-07 |
| ENSG00000125247 | TMTC4      | transmembrane O-mannosyltransferase targeting cadherins 4 [Source:HGNC Symbol;Acc:HGNC:25904] | 143 | -0.86 | 0.1597 | -5.4 | 6.6E-08 | 2.8E-07 |
| ENSG00000128713 | HOXD11     | homeobox D11 [Source:HGNC Symbol;Acc:HGNC:5134]                                               | 35  | -1.79 | 0.3321 | -5.4 | 6.6E-08 | 2.8E-07 |
| ENSG00000134253 | TRIM45     | tripartite motif containing 45 [Source:HGNC Symbol;Acc:HGNC:19018]                            | 377 | -0.52 | 0.0958 | -5.4 | 6.7E-08 | 2.9E-07 |
| ENSG00000287420 | ENSG000002 | novel transcript                                                                              | 16  | -4.10 | 0.7602 | -5.4 | 6.7E-08 | 2.9E-07 |
| ENSG00000203791 | EEF1AKMT2  | EEF1A lysine methyltransferase 2 [Source:HGNC Symbol;Acc:HGNC:33787]                          | 128 | -0.91 | 0.1681 | -5.4 | 6.9E-08 | 2.9E-07 |
| ENSG00000023892 | DEF6       | DEF6 guanine nucleotide exchange factor [Source:HGNC Symbol;Acc:HGNC:2760]                    | 23  | -2.36 | 0.4384 | -5.4 | 7.0E-08 | 3.0E-07 |
| ENSG00000005513 | SOX8       | SRY-box transcription factor 8 [Source:HGNC Symbol;Acc:HGNC:11203]                            | 33  | -1.90 | 0.3517 | -5.4 | 7.0E-08 | 3.0E-07 |
| ENSG00000251474 | RPL32P3    | ribosomal protein L32 pseudogene 3 [Source:HGNC Symbol;Acc:HGNC:27024]                        | 317 | -0.60 | 0.1121 | -5.4 | 7.1E-08 | 3.0E-07 |
| ENSG00000265944 | LINC01387  | long intergenic non-protein coding RNA 1387 [Source:HGNC Symbol;Acc:HGNC:44660]               | 11  | -6.82 | 1.2658 | -5.4 | 7.2E-08 | 3.1E-07 |
| ENSG00000167851 | CD300A     | CD300a molecule [Source:HGNC Symbol;Acc:HGNC:19319]                                           | 22  | -2.52 | 0.4684 | -5.4 | 7.8E-08 | 3.3E-07 |
| ENSG00000171051 | FPR1       | formyl peptide receptor 1 [Source:HGNC Symbol;Acc:HGNC:3826]                                  | 20  | -2.87 | 0.5337 | -5.4 | 7.9E-08 | 3.3E-07 |
| ENSG00000139737 | SLAIN1     | SLAIN motif family member 1 [Source:HGNC Symbol;Acc:HGNC:26387]                               | 30  | -2.16 | 0.4020 | -5.4 | 8.0E-08 | 3.4E-07 |
| ENSG00000140254 | DUOXA1     | dual oxidase maturation factor 1 [Source:HGNC Symbol;Acc:HGNC:26507]                          | 15  | -3.83 | 0.7164 | -5.4 | 8.6E-08 | 3.6E-07 |
| ENSG00000102032 | RENBP      | renin binding protein [Source:HGNC Symbol;Acc:HGNC:9959]                                      | 36  | -2.03 | 0.3801 | -5.4 | 8.8E-08 | 3.7E-07 |
| ENSG00000134490 | TMEM241    | transmembrane protein 241 [Source:HGNC Symbol;Acc:HGNC:31723]                                 | 344 | -0.56 | 0.1044 | -5.4 | 8.8E-08 | 3.7E-07 |
| ENSG00000157873 | TNFRSF14   | TNF receptor superfamily member 14 [Source:HGNC Symbol;Acc:HGNC:11912]                        | 53  | -1.58 | 0.2960 | -5.3 | 8.9E-08 | 3.7E-07 |
| ENSG00000091428 | RAPGEF4    | Rap guanine nucleotide exchange factor 4 [Source:HGNC Symbol;Acc:HGNC:16626]                  | 16  | -3.84 | 0.7185 | -5.3 | 8.9E-08 | 3.8E-07 |
| ENSG00000176884 | GRIN1      | glutamate ionotropic receptor NMDA type subunit 1 [Source:HGNC Symbol;Acc:HGNC:4584]          | 33  | -1.95 | 0.3642 | -5.3 | 9.0E-08 | 3.8E-07 |
| ENSG00000136098 | NEK3       | NIMA related kinase 3 [Source:HGNC Symbol;Acc:HGNC:7746]                                      | 68  | -1.21 | 0.2271 | -5.3 | 9.7E-08 | 4.1E-07 |
| ENSG00000166839 | ANKDD1A    | ankyrin repeat and death domain containing 1A [Source:HGNC Symbol;Acc:HGNC:28002]             | 116 | -0.91 | 0.1714 | -5.3 | 9.7E-08 | 4.1E-07 |
| ENSG00000138675 | FGF5       | fibroblast growth factor 5 [Source:HGNC Symbol;Acc:HGNC:3683]                                 | 15  | -4.37 | 0.8204 | -5.3 | 1.0E-07 | 4.2E-07 |
| ENSG00000236044 | FABP5P2    | fatty acid binding protein 5 pseudogene 2 [Source:HGNC Symbol;Acc:HGNC:31060]                 | 29  | -2.05 | 0.3848 | -5.3 | 1.0E-07 | 4.3E-07 |
| ENSG00000258314 | ENSG000002 | novel transcript                                                                              | 25  | -2.26 | 0.4241 | -5.3 | 1.0E-07 | 4.3E-07 |
| ENSG00000172296 | SPTLC3     | serine palmitoyltransferase long chain base subunit 3 [Source:HGNC Symbol;Acc:HGNC:16253]     | 338 | -0.56 | 0.1048 | -5.3 | 1.0E-07 | 4.3E-07 |
| ENSG00000021826 | CPS1       | carbamoyl-phosphate synthase 1 [Source:HGNC Symbol;Acc:HGNC:2323]                             | 27  | -2.08 | 0.3914 | -5.3 | 1.0E-07 | 4.4E-07 |
| ENSG00000175899 | A2M        | alpha-2-macroglobulin [Source:HGNC Symbol;Acc:HGNC:7]                                         | 79  | -1.38 | 0.2588 | -5.3 | 1.1E-07 | 4.5E-07 |
| ENSG00000164434 | FABP7      | fatty acid binding protein 7 [Source:HGNC Symbol;Acc:HGNC:3562]                               | 24  | -2.54 | 0.4795 | -5.3 | 1.1E-07 | 4.8E-07 |
| ENSG00000232077 | LINC01031  | long intergenic non-protein coding RNA 1031 [Source:HGNC Symbol;Acc:HGNC:49017]               | 17  | -6.55 | 1.2368 | -5.3 | 1.2E-07 | 4.9E-07 |
| ENSG00000124785 | NRN1       | neuritin 1 [Source:HGNC Symbol;Acc:HGNC:17972]                                                | 42  | -1.62 | 0.3051 | -5.3 | 1.2E-07 | 5.0E-07 |
| ENSG00000239521 | CASTOR3    | CASTOR family member 3 [Source:HGNC Symbol;Acc:HGNC:29954]                                    | 169 | -0.80 | 0.1510 | -5.3 | 1.2E-07 | 5.0E-07 |
| ENSG00000185156 | MFSD6L     | major facilitator superfamily domain containing 6 like [Source:HGNC Symbol;Acc:HGNC:26656]    | 16  | -3.59 | 0.6779 | -5.3 | 1.2E-07 | 5.1E-07 |
| ENSG00000286385 | ENSG000002 | novel transcript                                                                              | 10  | -6.73 | 1.2720 | -5.3 | 1.2E-07 | 5.1E-07 |
| ENSG00000131095 | GFAP       | glial fibrillary acidic protein [Source:HGNC Symbol;Acc:HGNC:4235]                            | 756 | -2.87 | 0.5425 | -5.3 | 1.2E-07 | 5.2E-07 |
| ENSG00000112367 | FIG4       | FIG4 phosphoinositide 5-phosphatase [Source:HGNC Symbol;Acc:HGNC:16873]                       | 178 | -0.72 | 0.1371 | -5.3 | 1.3E-07 | 5.3E-07 |
| ENSG00000159445 | THEM4      | thioesterase superfamily member 4 [Source:HGNC Symbol;Acc:HGNC:17947]                         | 259 | -0.62 | 0.1174 | -5.3 | 1.3E-07 | 5.4E-07 |
| ENSG00000105255 | FSD1       | fibronectin type III and SPRY domain containing 1 [Source:HGNC Symbol;Acc:HGNC:13745]         | 181 | -0.74 | 0.1402 | -5.3 | 1.3E-07 | 5.5E-07 |
| ENSG00000234432 | ENSG000002 | novel transcript                                                                              | 96  | -1.04 | 0.1980 | -5.3 | 1.3E-07 | 5.5E-07 |
| ENSG00000181274 | FRAT2      | FRAT regulator of WNT signaling pathway 2 [Source:HGNC Symbol;Acc:HGNC:16048]                 | 260 | -0.63 | 0.1191 | -5.3 | 1.4E-07 | 5.7E-07 |
| ENSG00000109794 | FAM149A    | family with sequence similarity 149 member A [Source:HGNC Symbol;Acc:HGNC:24527]              | 92  | -1.02 | 0.1939 | -5.3 | 1.4E-07 | 5.9E-07 |
| ENSG00000204021 | LIPK       | lipase family member K [Source:HGNC Symbol;Acc:HGNC:23444]                                    | 207 | -0.71 | 0.1353 | -5.3 | 1.5E-07 | 6.1E-07 |



|                 |                 |                                                                                                                                       |     |       |        |      |         |         |
|-----------------|-----------------|---------------------------------------------------------------------------------------------------------------------------------------|-----|-------|--------|------|---------|---------|
| ENSG00000102934 | PLLP            | plasmolipin [Source:HGNC Symbol;Acc:HGNC:18553]                                                                                       | 53  | -1.41 | 0.2685 | -5.3 | 1.5E-07 | 6.1E-07 |
| ENSG00000184730 | APOBR           | apolipoprotein B receptor [Source:HGNC Symbol;Acc:HGNC:24087]                                                                         | 39  | -1.66 | 0.3161 | -5.3 | 1.5E-07 | 6.1E-07 |
| ENSG00000153391 | INO80C          | INO80 complex subunit C [Source:HGNC Symbol;Acc:HGNC:26994]                                                                           | 271 | -0.60 | 0.1148 | -5.3 | 1.5E-07 | 6.2E-07 |
| ENSG00000179862 | CITED4          | Cbp/p300 interacting transactivator with Glu/Asp rich carboxy-terminal domain 4 [Source:HGNC Symbol;Acc:HGNC:26994]                   | 774 | -0.85 | 0.1613 | -5.3 | 1.5E-07 | 6.3E-07 |
| ENSG00000277738 | ENSG00000277738 | novel transcript                                                                                                                      | 18  | -2.82 | 0.5383 | -5.2 | 1.5E-07 | 6.3E-07 |
| ENSG00000274180 | NATD1           | N-acetyltransferase domain containing 1 [Source:HGNC Symbol;Acc:HGNC:30770]                                                           | 226 | -0.64 | 0.1223 | -5.2 | 1.6E-07 | 6.5E-07 |
| ENSG00000234996 | ACTG1P25        | actin gamma 1 pseudogene 25 [Source:HGNC Symbol;Acc:HGNC:54872]                                                                       | 33  | -1.78 | 0.3399 | -5.2 | 1.6E-07 | 6.6E-07 |
| ENSG00000166927 | MS4A7           | membrane spanning 4-domains A7 [Source:HGNC Symbol;Acc:HGNC:13378]                                                                    | 23  | -2.34 | 0.4462 | -5.2 | 1.6E-07 | 6.7E-07 |
| ENSG00000249803 | ENSG00000249803 | novel transcript                                                                                                                      | 10  | -6.68 | 1.2749 | -5.2 | 1.6E-07 | 6.7E-07 |
| ENSG00000259038 | ENSG00000259038 | novel transcript, antisense to RAD51L1                                                                                                | 19  | -2.77 | 0.5289 | -5.2 | 1.7E-07 | 6.9E-07 |
| ENSG00000169884 | WNT10B          | Wnt family member 10B [Source:HGNC Symbol;Acc:HGNC:12775]                                                                             | 57  | -1.38 | 0.2639 | -5.2 | 1.7E-07 | 7.0E-07 |
| ENSG00000141441 | GAREM1          | GRB2 associated regulator of MAPK1 subtype 1 [Source:HGNC Symbol;Acc:HGNC:26136]                                                      | 248 | -0.62 | 0.1191 | -5.2 | 1.7E-07 | 7.0E-07 |
| ENSG00000168843 | FSTL5           | follistatin like 5 [Source:HGNC Symbol;Acc:HGNC:21386]                                                                                | 14  | -3.96 | 0.7573 | -5.2 | 1.7E-07 | 7.1E-07 |
| ENSG00000174028 | FAM3C2P         | family with sequence similarity 3 member C2, pseudogene [Source:HGNC Symbol;Acc:HGNC:34501]                                           | 222 | -0.68 | 0.1308 | -5.2 | 1.7E-07 | 7.1E-07 |
| ENSG00000164929 | BAALC           | BAALC binder of MAP3K1 and KLF4 [Source:HGNC Symbol;Acc:HGNC:14333]                                                                   | 34  | -1.87 | 0.3579 | -5.2 | 1.7E-07 | 7.1E-07 |
| ENSG0000015592  | STMN4           | stathmin 4 [Source:HGNC Symbol;Acc:HGNC:16078]                                                                                        | 18  | -2.98 | 0.5716 | -5.2 | 1.8E-07 | 7.4E-07 |
| ENSG00000184860 | SDR42E1         | short chain dehydrogenase/reductase family 42E, member 1 [Source:HGNC Symbol;Acc:HGNC:29834]                                          | 358 | -0.52 | 0.0999 | -5.2 | 1.8E-07 | 7.4E-07 |
| ENSG00000214553 | LRRC37A11P      | leucine rich repeat containing 37 member A11, pseudogene [Source:HGNC Symbol;Acc:HGNC:43815]                                          | 14  | -4.30 | 0.8244 | -5.2 | 1.8E-07 | 7.6E-07 |
| ENSG00000197147 | LRRC8B          | leucine rich repeat containing 8 VRAC subunit B [Source:HGNC Symbol;Acc:HGNC:30692]                                                   | 344 | -0.52 | 0.1006 | -5.2 | 1.8E-07 | 7.6E-07 |
| ENSG00000253660 | ENSG00000253660 | novel transcript                                                                                                                      | 18  | -2.75 | 0.5268 | -5.2 | 1.9E-07 | 7.6E-07 |
| ENSG00000106852 | LHX6            | LIM homeobox 6 [Source:HGNC Symbol;Acc:HGNC:21735]                                                                                    | 41  | -1.58 | 0.3038 | -5.2 | 1.9E-07 | 7.6E-07 |
| ENSG00000233901 | LINC01503       | long intergenic non-protein coding RNA 1503 [Source:HGNC Symbol;Acc:HGNC:51184]                                                       | 18  | -2.84 | 0.5454 | -5.2 | 1.9E-07 | 7.7E-07 |
| ENSG00000107742 | SPOCK2          | SPARC (osteonectin), cwcv and kazal like domains proteoglycan 2 [Source:HGNC Symbol;Acc:HGNC:13564]                                   | 138 | -0.85 | 0.1636 | -5.2 | 1.9E-07 | 7.8E-07 |
| ENSG00000105246 | EBI3            | Epstein-Barr virus induced 3 [Source:HGNC Symbol;Acc:HGNC:3129]                                                                       | 25  | -2.14 | 0.4121 | -5.2 | 2.0E-07 | 8.2E-07 |
| ENSG00000213186 | TRIM59          | tripartite motif containing 59 [Source:HGNC Symbol;Acc:HGNC:30834]                                                                    | 227 | -0.65 | 0.1255 | -5.2 | 2.0E-07 | 8.3E-07 |
| ENSG00000123560 | PLP1            | proteolipid protein 1 [Source:HGNC Symbol;Acc:HGNC:9086]                                                                              | 38  | -1.77 | 0.3412 | -5.2 | 2.0E-07 | 8.3E-07 |
| ENSG00000124749 | COL21A1         | collagen type XXI alpha 1 chain [Source:HGNC Symbol;Acc:HGNC:17025]                                                                   | 10  | -6.64 | 1.2771 | -5.2 | 2.0E-07 | 8.3E-07 |
| ENSG00000076770 | MBNL3           | muscleblind like splicing regulator 3 [Source:HGNC Symbol;Acc:HGNC:20564]                                                             | 92  | -1.06 | 0.2041 | -5.2 | 2.1E-07 | 8.5E-07 |
| ENSG00000136158 | SPRY2           | sprouty RTK signaling antagonist 2 [Source:HGNC Symbol;Acc:HGNC:11270]                                                                | 285 | -0.60 | 0.1156 | -5.2 | 2.1E-07 | 8.5E-07 |
| ENSG00000242861 | ENSG00000242861 | novel transcript                                                                                                                      | 42  | -1.55 | 0.2990 | -5.2 | 2.1E-07 | 8.6E-07 |
| ENSG00000082014 | SMARCD3         | SWI/SNF related, matrix associated, actin dependent regulator of chromatin, subfamily d, member 3 [Source:HGNC Symbol;Acc:HGNC:26136] | 123 | -0.86 | 0.1656 | -5.2 | 2.1E-07 | 8.6E-07 |
| ENSG00000283000 | LINC02635       | long intergenic non-protein coding RNA 2635 [Source:HGNC Symbol;Acc:HGNC:54118]                                                       | 93  | -1.00 | 0.1936 | -5.2 | 2.2E-07 | 8.9E-07 |
| ENSG00000197506 | SLC28A3         | solute carrier family 28 member 3 [Source:HGNC Symbol;Acc:HGNC:16484]                                                                 | 23  | -2.35 | 0.4537 | -5.2 | 2.3E-07 | 9.3E-07 |
| ENSG00000130545 | CRB3            | crumbs cell polarity complex component 3 [Source:HGNC Symbol;Acc:HGNC:20237]                                                          | 183 | -0.79 | 0.1519 | -5.2 | 2.3E-07 | 9.3E-07 |
| ENSG00000171517 | LPAR3           | lysophosphatidic acid receptor 3 [Source:HGNC Symbol;Acc:HGNC:14298]                                                                  | 56  | -1.38 | 0.2669 | -5.2 | 2.3E-07 | 9.3E-07 |
| ENSG00000007402 | CACNA2D2        | calcium voltage-gated channel auxiliary subunit alpha2delta 2 [Source:HGNC Symbol;Acc:HGNC:1400]                                      | 99  | -0.99 | 0.1906 | -5.2 | 2.4E-07 | 9.6E-07 |
| ENSG00000111405 | ENDOU           | endonuclease, poly(U) specific [Source:HGNC Symbol;Acc:HGNC:14369]                                                                    | 16  | -6.43 | 1.2443 | -5.2 | 2.4E-07 | 9.7E-07 |
| ENSG00000257027 | ENSG00000257027 | novel transcript                                                                                                                      | 42  | -1.57 | 0.3044 | -5.2 | 2.4E-07 | 9.7E-07 |
| ENSG00000165115 | KIF27           | kinesin family member 27 [Source:HGNC Symbol;Acc:HGNC:18632]                                                                          | 97  | -1.02 | 0.1981 | -5.2 | 2.5E-07 | 1.0E-06 |
| ENSG00000185442 | FAM174B         | family with sequence similarity 174 member B [Source:HGNC Symbol;Acc:HGNC:34339]                                                      | 250 | -0.64 | 0.1238 | -5.2 | 2.6E-07 | 1.0E-06 |
| ENSG00000198774 | RASSF9          | Ras association domain family member 9 [Source:HGNC Symbol;Acc:HGNC:15739]                                                            | 9   | -6.61 | 1.2838 | -5.2 | 2.6E-07 | 1.0E-06 |
| ENSG00000168026 | TTC21A          | tetratricopeptide repeat domain 21A [Source:HGNC Symbol;Acc:HGNC:30761]                                                               | 89  | -1.04 | 0.2010 | -5.1 | 2.6E-07 | 1.1E-06 |

|                 |                 |                                                                                                            |     |       |        |      |         |         |
|-----------------|-----------------|------------------------------------------------------------------------------------------------------------|-----|-------|--------|------|---------|---------|
| ENSG00000147364 | FBXO25          | F-box protein 25 [Source:HGNC Symbol;Acc:HGNC:13596]                                                       | 192 | -0.68 | 0.1316 | -5.1 | 2.6E-07 | 1.1E-06 |
| ENSG00000137462 | TLR2            | toll like receptor 2 [Source:HGNC Symbol;Acc:HGNC:11848]                                                   | 29  | -1.94 | 0.3772 | -5.1 | 2.8E-07 | 1.1E-06 |
| ENSG00000135744 | AGT             | angiotensinogen [Source:HGNC Symbol;Acc:HGNC:333]                                                          | 14  | -3.69 | 0.7185 | -5.1 | 2.8E-07 | 1.1E-06 |
| ENSG00000130005 | GAMT            | guanidinoacetate N-methyltransferase [Source:HGNC Symbol;Acc:HGNC:4136]                                    | 431 | -0.51 | 0.1001 | -5.1 | 2.8E-07 | 1.1E-06 |
| ENSG00000130150 | MOSPD2          | motile sperm domain containing 2 [Source:HGNC Symbol;Acc:HGNC:28381]                                       | 234 | -0.63 | 0.1224 | -5.1 | 2.8E-07 | 1.1E-06 |
| ENSG00000130766 | SESN2           | sestrin 2 [Source:HGNC Symbol;Acc:HGNC:20746]                                                              | 282 | -0.60 | 0.1160 | -5.1 | 2.9E-07 | 1.2E-06 |
| ENSG00000139910 | NOVA1           | NOVA alternative splicing regulator 1 [Source:HGNC Symbol;Acc:HGNC:7886]                                   | 19  | -3.02 | 0.5886 | -5.1 | 2.9E-07 | 1.2E-06 |
| ENSG00000196659 | TTC30B          | tetratricopeptide repeat domain 30B [Source:HGNC Symbol;Acc:HGNC:26425]                                    | 142 | -0.80 | 0.1565 | -5.1 | 3.0E-07 | 1.2E-06 |
| ENSG00000069493 | CLEC2D          | C-type lectin domain family 2 member D [Source:HGNC Symbol;Acc:HGNC:14351]                                 | 133 | -0.82 | 0.1604 | -5.1 | 3.1E-07 | 1.2E-06 |
| ENSG00000010671 | BTK             | Bruton tyrosine kinase [Source:HGNC Symbol;Acc:HGNC:1133]                                                  | 24  | -2.18 | 0.4257 | -5.1 | 3.1E-07 | 1.2E-06 |
| ENSG00000085382 | HACE1           | HECT domain and ankyrin repeat containing E3 ubiquitin protein ligase 1 [Source:HGNC Symbol;Acc:HGNC:1133] | 164 | -0.77 | 0.1515 | -5.1 | 3.1E-07 | 1.3E-06 |
| ENSG00000181982 | CCDC149         | coiled-coil domain containing 149 [Source:HGNC Symbol;Acc:HGNC:25405]                                      | 242 | -0.60 | 0.1179 | -5.1 | 3.1E-07 | 1.3E-06 |
| ENSG00000184486 | POU3F2          | POU class 3 homeobox 2 [Source:HGNC Symbol;Acc:HGNC:9215]                                                  | 15  | -3.18 | 0.6229 | -5.1 | 3.2E-07 | 1.3E-06 |
| ENSG00000145242 | EPHA5           | EPH receptor A5 [Source:HGNC Symbol;Acc:HGNC:3389]                                                         | 18  | -2.70 | 0.5277 | -5.1 | 3.2E-07 | 1.3E-06 |
| ENSG00000053438 | NNAT            | neuronatin [Source:HGNC Symbol;Acc:HGNC:7860]                                                              | 87  | -1.03 | 0.2006 | -5.1 | 3.2E-07 | 1.3E-06 |
| ENSG00000068831 | RASGRP2         | RAS guanyl releasing protein 2 [Source:HGNC Symbol;Acc:HGNC:9879]                                          | 25  | -2.27 | 0.4439 | -5.1 | 3.3E-07 | 1.3E-06 |
| ENSG00000203710 | CR1             | complement C3b/C4b receptor 1 (Knops blood group) [Source:HGNC Symbol;Acc:HGNC:2334]                       | 20  | -2.75 | 0.5396 | -5.1 | 3.3E-07 | 1.3E-06 |
| ENSG00000280206 | ENSG00000280206 | novel transcript                                                                                           | 129 | -0.85 | 0.1675 | -5.1 | 3.4E-07 | 1.3E-06 |
| ENSG00000204121 | ECEL1P1         | endothelin converting enzyme like 1 pseudogene 1 [Source:HGNC Symbol;Acc:HGNC:14017]                       | 43  | -1.59 | 0.3121 | -5.1 | 3.4E-07 | 1.4E-06 |
| ENSG00000115226 | FNDC4           | fibronectin type III domain containing 4 [Source:HGNC Symbol;Acc:HGNC:20239]                               | 109 | -0.90 | 0.1772 | -5.1 | 3.4E-07 | 1.4E-06 |
| ENSG00000183671 | GPR1            | G protein-coupled receptor 1 [Source:HGNC Symbol;Acc:HGNC:4463]                                            | 133 | -0.82 | 0.1618 | -5.1 | 3.4E-07 | 1.4E-06 |
| ENSG00000113721 | PDGFRB          | platelet derived growth factor receptor beta [Source:HGNC Symbol;Acc:HGNC:8804]                            | 28  | -1.98 | 0.3891 | -5.1 | 3.4E-07 | 1.4E-06 |
| ENSG00000106780 | MEGF9           | multiple EGF like domains 9 [Source:HGNC Symbol;Acc:HGNC:3234]                                             | 186 | -0.73 | 0.1434 | -5.1 | 3.4E-07 | 1.4E-06 |
| ENSG00000250328 | MGC32805        | uncharacterized LOC153163 [Source:NCBI gene (formerly Entrezgene);Acc:153163]                              | 17  | -5.55 | 1.0887 | -5.1 | 3.5E-07 | 1.4E-06 |
| ENSG00000146122 | DAAM2           | dishevelled associated activator of morphogenesis 2 [Source:HGNC Symbol;Acc:HGNC:18143]                    | 28  | -2.06 | 0.4058 | -5.1 | 3.7E-07 | 1.5E-06 |
| ENSG00000176490 | DIRAS1          | DIRAS family GTPase 1 [Source:HGNC Symbol;Acc:HGNC:19127]                                                  | 191 | -0.73 | 0.1433 | -5.1 | 3.8E-07 | 1.5E-06 |
| ENSG00000287860 | ENSG00000287860 | novel transcript                                                                                           | 15  | -3.30 | 0.6506 | -5.1 | 3.9E-07 | 1.6E-06 |
| ENSG00000175087 | PDIK1L          | PDLIM1 interacting kinase 1 like [Source:HGNC Symbol;Acc:HGNC:18981]                                       | 312 | -0.59 | 0.1163 | -5.1 | 4.0E-07 | 1.6E-06 |
| ENSG00000159871 | LYPD5           | LY6/PLAUR domain containing 5 [Source:HGNC Symbol;Acc:HGNC:26397]                                          | 318 | -0.54 | 0.1072 | -5.1 | 4.1E-07 | 1.6E-06 |
| ENSG00000110975 | SYT10           | synaptotagmin 10 [Source:HGNC Symbol;Acc:HGNC:19266]                                                       | 14  | -4.71 | 0.9320 | -5.1 | 4.2E-07 | 1.7E-06 |
| ENSG00000254153 | ENSG00000254153 | novel transcript                                                                                           | 15  | -3.31 | 0.6552 | -5.1 | 4.3E-07 | 1.7E-06 |
| ENSG00000138190 | EXOC6           | exocyst complex component 6 [Source:HGNC Symbol;Acc:HGNC:23196]                                            | 248 | -0.61 | 0.1203 | -5.1 | 4.4E-07 | 1.7E-06 |
| ENSG00000163462 | TRIM46          | tripartite motif containing 46 [Source:HGNC Symbol;Acc:HGNC:19019]                                         | 55  | -1.41 | 0.2786 | -5.0 | 4.4E-07 | 1.7E-06 |
| ENSG00000154553 | PDLIM3          | PDZ and LIM domain 3 [Source:HGNC Symbol;Acc:HGNC:20767]                                                   | 15  | -3.48 | 0.6895 | -5.0 | 4.4E-07 | 1.8E-06 |
| ENSG00000240122 | FABP5P11        | fatty acid binding protein 5 pseudogene 11 [Source:HGNC Symbol;Acc:HGNC:19328]                             | 15  | -3.14 | 0.6230 | -5.0 | 4.5E-07 | 1.8E-06 |
| ENSG00000204060 | FOXO6           | forkhead box O6 [Source:HGNC Symbol;Acc:HGNC:24814]                                                        | 23  | -2.25 | 0.4464 | -5.0 | 4.6E-07 | 1.8E-06 |
| ENSG00000132386 | SERPINF1        | serpin family F member 1 [Source:HGNC Symbol;Acc:HGNC:8824]                                                | 90  | -0.98 | 0.1953 | -5.0 | 4.6E-07 | 1.8E-06 |
| ENSG00000166394 | CYB5R2          | cytochrome b5 reductase 2 [Source:HGNC Symbol;Acc:HGNC:24376]                                              | 67  | -1.23 | 0.2438 | -5.0 | 4.8E-07 | 1.9E-06 |
| ENSG00000277718 | LINC02255       | long intergenic non-protein coding RNA 2255 [Source:HGNC Symbol;Acc:HGNC:53153]                            | 15  | -4.79 | 0.9523 | -5.0 | 4.8E-07 | 1.9E-06 |
| ENSG00000180287 | PLD5            | phospholipase D family member 5 [Source:HGNC Symbol;Acc:HGNC:26879]                                        | 16  | -3.04 | 0.6053 | -5.0 | 4.9E-07 | 1.9E-06 |
| ENSG00000169777 | TAS2R1          | taste 2 receptor member 1 [Source:HGNC Symbol;Acc:HGNC:14909]                                              | 15  | -3.11 | 0.6199 | -5.0 | 5.1E-07 | 2.0E-06 |
| ENSG00000103569 | AQP9            | aquaporin 9 [Source:HGNC Symbol;Acc:HGNC:643]                                                              | 17  | -2.81 | 0.5612 | -5.0 | 5.3E-07 | 2.1E-06 |

|                 |                 |                                                                                                      |     |       |        |      |         |         |
|-----------------|-----------------|------------------------------------------------------------------------------------------------------|-----|-------|--------|------|---------|---------|
| ENSG00000198914 | POU3F3          | POU class 3 homeobox 3 [Source:HGNC Symbol;Acc:HGNC:9216]                                            | 14  | -3.44 | 0.6868 | -5.0 | 5.5E-07 | 2.1E-06 |
| ENSG00000137941 | TTL7            | tubulin tyrosine ligase like 7 [Source:HGNC Symbol;Acc:HGNC:26242]                                   | 188 | -0.68 | 0.1366 | -5.0 | 5.5E-07 | 2.1E-06 |
| ENSG00000104368 | PLAT            | plasminogen activator, tissue type [Source:HGNC Symbol;Acc:HGNC:9051]                                | 29  | -1.89 | 0.3779 | -5.0 | 5.5E-07 | 2.2E-06 |
| ENSG00000139304 | PTPRQ           | protein tyrosine phosphatase receptor type Q [Source:HGNC Symbol;Acc:HGNC:9679]                      | 16  | -2.93 | 0.5867 | -5.0 | 5.7E-07 | 2.2E-06 |
| ENSG00000050438 | SLC4A8          | solute carrier family 4 member 8 [Source:HGNC Symbol;Acc:HGNC:11034]                                 | 80  | -1.20 | 0.2393 | -5.0 | 5.8E-07 | 2.3E-06 |
| ENSG00000107014 | RLN2            | relaxin 2 [Source:HGNC Symbol;Acc:HGNC:10027]                                                        | 17  | -2.93 | 0.5873 | -5.0 | 5.9E-07 | 2.3E-06 |
| ENSG00000225783 | MIAT            | myocardial infarction associated transcript [Source:HGNC Symbol;Acc:HGNC:33425]                      | 31  | -1.87 | 0.3744 | -5.0 | 5.9E-07 | 2.3E-06 |
| ENSG00000159173 | TNNI1           | troponin I1, slow skeletal type [Source:HGNC Symbol;Acc:HGNC:11945]                                  | 60  | -1.22 | 0.2438 | -5.0 | 5.9E-07 | 2.3E-06 |
| ENSG00000111981 | ULBP1           | UL16 binding protein 1 [Source:HGNC Symbol;Acc:HGNC:14893]                                           | 78  | -1.06 | 0.2119 | -5.0 | 6.2E-07 | 2.4E-06 |
| ENSG00000137474 | MYO7A           | myosin VIIA [Source:HGNC Symbol;Acc:HGNC:7606]                                                       | 97  | -0.96 | 0.1934 | -5.0 | 6.3E-07 | 2.4E-06 |
| ENSG00000105967 | TFEC            | transcription factor EC [Source:HGNC Symbol;Acc:HGNC:11754]                                          | 14  | -3.62 | 0.7275 | -5.0 | 6.4E-07 | 2.5E-06 |
| ENSG00000237854 | LINC00674       | long intergenic non-protein coding RNA 674 [Source:HGNC Symbol;Acc:HGNC:44355]                       | 172 | -1.50 | 0.3008 | -5.0 | 6.4E-07 | 2.5E-06 |
| ENSG00000248727 | LINC01948       | long intergenic non-protein coding RNA 1948 [Source:HGNC Symbol;Acc:HGNC:52772]                      | 56  | -1.25 | 0.2520 | -5.0 | 6.5E-07 | 2.5E-06 |
| ENSG00000126561 | STAT5A          | signal transducer and activator of transcription 5A [Source:HGNC Symbol;Acc:HGNC:11366]              | 197 | -0.67 | 0.1343 | -5.0 | 6.6E-07 | 2.6E-06 |
| ENSG00000141744 | PNMT            | phenylethanolamine N-methyltransferase [Source:HGNC Symbol;Acc:HGNC:9160]                            | 16  | -2.98 | 0.6019 | -5.0 | 7.1E-07 | 2.7E-06 |
| ENSG00000135960 | EDAR            | ectodysplasin A receptor [Source:HGNC Symbol;Acc:HGNC:2895]                                          | 16  | -2.98 | 0.6014 | -5.0 | 7.2E-07 | 2.8E-06 |
| ENSG00000241399 | CD302           | CD302 molecule [Source:HGNC Symbol;Acc:HGNC:30843]                                                   | 14  | -3.63 | 0.7336 | -5.0 | 7.2E-07 | 2.8E-06 |
| ENSG00000187266 | EPOR            | erythropoietin receptor [Source:HGNC Symbol;Acc:HGNC:3416]                                           | 102 | -0.92 | 0.1864 | -4.9 | 7.5E-07 | 2.9E-06 |
| ENSG00000110934 | BIN2            | bridging integrator 2 [Source:HGNC Symbol;Acc:HGNC:1053]                                             | 28  | -2.00 | 0.4038 | -4.9 | 7.6E-07 | 2.9E-06 |
| ENSG00000260804 | LINC01963       | long intergenic non-protein coding RNA 1963 [Source:HGNC Symbol;Acc:HGNC:25283]                      | 52  | -1.33 | 0.2683 | -4.9 | 7.8E-07 | 3.0E-06 |
| ENSG00000090382 | LYZ             | lysozyme [Source:HGNC Symbol;Acc:HGNC:6740]                                                          | 15  | -2.99 | 0.6059 | -4.9 | 7.9E-07 | 3.1E-06 |
| ENSG00000176165 | FOXG1           | forkhead box G1 [Source:HGNC Symbol;Acc:HGNC:3811]                                                   | 16  | -2.86 | 0.5793 | -4.9 | 8.1E-07 | 3.1E-06 |
| ENSG00000179454 | KLHL28          | kelch like family member 28 [Source:HGNC Symbol;Acc:HGNC:19741]                                      | 223 | -0.64 | 0.1290 | -4.9 | 8.2E-07 | 3.2E-06 |
| ENSG00000197183 | NOL4L           | nucleolar protein 4 like [Source:HGNC Symbol;Acc:HGNC:16106]                                         | 307 | -0.53 | 0.1070 | -4.9 | 8.6E-07 | 3.3E-06 |
| ENSG00000204941 | PSG5            | pregnancy specific beta-1-glycoprotein 5 [Source:HGNC Symbol;Acc:HGNC:9522]                          | 26  | -1.92 | 0.3898 | -4.9 | 8.7E-07 | 3.4E-06 |
| ENSG00000104848 | KCNA7           | potassium voltage-gated channel subfamily A member 7 [Source:HGNC Symbol;Acc:HGNC:6226]              | 54  | -1.29 | 0.2618 | -4.9 | 8.9E-07 | 3.4E-06 |
| ENSG00000270115 | ENSG00000270115 | novel transcript                                                                                     | 23  | -2.13 | 0.4333 | -4.9 | 8.9E-07 | 3.4E-06 |
| ENSG00000173221 | GLRX            | glutaredoxin [Source:HGNC Symbol;Acc:HGNC:4330]                                                      | 289 | -0.58 | 0.1173 | -4.9 | 9.0E-07 | 3.4E-06 |
| ENSG00000268879 | IGFL1P1         | IGF like family member 1 pseudogene 1 [Source:HGNC Symbol;Acc:HGNC:32956]                            | 326 | -0.51 | 0.1037 | -4.9 | 9.0E-07 | 3.5E-06 |
| ENSG00000227141 | ENSG00000227141 | centaurin, gamma 2 (CENTG2) pseudogene                                                               | 13  | -4.17 | 0.8498 | -4.9 | 9.1E-07 | 3.5E-06 |
| ENSG00000283930 | PLD5P1          | PLD5 pseudogene 1 [Source:HGNC Symbol;Acc:HGNC:55072]                                                | 19  | -2.45 | 0.4988 | -4.9 | 9.1E-07 | 3.5E-06 |
| ENSG00000112796 | ENPP5           | ectonucleotide pyrophosphatase/phosphodiesterase family member 5 [Source:HGNC Symbol;Acc:HGNC:11740] | 68  | -1.20 | 0.2444 | -4.9 | 9.2E-07 | 3.5E-06 |
| ENSG00000091513 | TF              | transferrin [Source:HGNC Symbol;Acc:HGNC:11740]                                                      | 15  | -3.02 | 0.6157 | -4.9 | 9.4E-07 | 3.6E-06 |
| ENSG00000175556 | LONRF3          | LON peptidase N-terminal domain and ring finger 3 [Source:HGNC Symbol;Acc:HGNC:21152]                | 38  | -1.56 | 0.3182 | -4.9 | 9.4E-07 | 3.6E-06 |
| ENSG00000237624 | OXCT2P1         | 3-oxoacid CoA-transferase 2 pseudogene 1 [Source:HGNC Symbol;Acc:HGNC:21627]                         | 32  | -1.76 | 0.3583 | -4.9 | 9.4E-07 | 3.6E-06 |
| ENSG00000161381 | PLXDC1          | plexin domain containing 1 [Source:HGNC Symbol;Acc:HGNC:20945]                                       | 26  | -2.01 | 0.4114 | -4.9 | 9.7E-07 | 3.7E-06 |
| ENSG00000183506 | PI4KAP2         | phosphatidylinositol 4-kinase alpha pseudogene 2 [Source:HGNC Symbol;Acc:HGNC:33577]                 | 29  | -1.82 | 0.3724 | -4.9 | 1.0E-06 | 3.9E-06 |
| ENSG00000112238 | PRDM13          | PR/SET domain 13 [Source:HGNC Symbol;Acc:HGNC:13998]                                                 | 14  | -5.36 | 1.0981 | -4.9 | 1.0E-06 | 4.0E-06 |
| ENSG00000157502 | PWWP3B          | PWWP domain containing 3B [Source:HGNC Symbol;Acc:HGNC:26583]                                        | 8   | -6.34 | 1.2995 | -4.9 | 1.0E-06 | 4.0E-06 |
| ENSG00000159899 | NPR2            | natriuretic peptide receptor 2 [Source:HGNC Symbol;Acc:HGNC:7944]                                    | 19  | -2.38 | 0.4885 | -4.9 | 1.1E-06 | 4.1E-06 |
| ENSG00000133710 | SPINK5          | serine peptidase inhibitor Kazal type 5 [Source:HGNC Symbol;Acc:HGNC:15464]                          | 30  | -1.80 | 0.3698 | -4.9 | 1.1E-06 | 4.1E-06 |
| ENSG00000250102 | LINC02377       | long intergenic non-protein coding RNA 2377 [Source:HGNC Symbol;Acc:HGNC:53300]                      | 8   | -6.40 | 1.3117 | -4.9 | 1.1E-06 | 4.1E-06 |

|                 |                 |                                                                                           |     |       |        |      |         |         |
|-----------------|-----------------|-------------------------------------------------------------------------------------------|-----|-------|--------|------|---------|---------|
| ENSG00000178235 | SLITRK1         | SLIT and NTRK like family member 1 [Source:HGNC Symbol;Acc:HGNC:20297]                    | 14  | -5.37 | 1.1000 | -4.9 | 1.1E-06 | 4.1E-06 |
| ENSG00000160325 | CACFD1          | calcium channel flower domain containing 1 [Source:HGNC Symbol;Acc:HGNC:1365]             | 129 | -0.79 | 0.1617 | -4.9 | 1.1E-06 | 4.1E-06 |
| ENSG00000261572 | ENSG00000261572 | novel transcript, intronic to CMTM8                                                       | 13  | -3.54 | 0.7287 | -4.9 | 1.2E-06 | 4.5E-06 |
| ENSG00000165185 | KIAA1958        | KIAA1958 [Source:HGNC Symbol;Acc:HGNC:23427]                                              | 260 | -0.60 | 0.1243 | -4.9 | 1.2E-06 | 4.7E-06 |
| ENSG00000165914 | TTC7B           | tetratricopeptide repeat domain 7B [Source:HGNC Symbol;Acc:HGNC:19858]                    | 214 | -0.63 | 0.1292 | -4.8 | 1.2E-06 | 4.7E-06 |
| ENSG00000162994 | CLHC1           | clathrin heavy chain linker domain containing 1 [Source:HGNC Symbol;Acc:HGNC:26453]       | 91  | -0.94 | 0.1930 | -4.8 | 1.3E-06 | 4.8E-06 |
| ENSG00000286502 | ENSG00000286502 | novel transcript, antisense to COL5A1                                                     | 16  | -2.78 | 0.5728 | -4.8 | 1.3E-06 | 4.8E-06 |
| ENSG00000110079 | MS4A4A          | membrane spanning 4-domains A4A [Source:HGNC Symbol;Acc:HGNC:13371]                       | 19  | -2.39 | 0.4932 | -4.8 | 1.3E-06 | 4.8E-06 |
| ENSG00000118432 | CNR1            | cannabinoid receptor 1 [Source:HGNC Symbol;Acc:HGNC:2159]                                 | 21  | -2.42 | 0.4998 | -4.8 | 1.3E-06 | 4.8E-06 |
| ENSG00000167916 | KRT24           | keratin 24 [Source:HGNC Symbol;Acc:HGNC:18527]                                            | 14  | -5.31 | 1.0975 | -4.8 | 1.3E-06 | 4.9E-06 |
| ENSG00000149451 | ADAM33          | ADAM metallopeptidase domain 33 [Source:HGNC Symbol;Acc:HGNC:15478]                       | 12  | -4.52 | 0.9350 | -4.8 | 1.3E-06 | 5.0E-06 |
| ENSG00000114270 | COL7A1          | collagen type VII alpha 1 chain [Source:HGNC Symbol;Acc:HGNC:2214]                        | 215 | -0.64 | 0.1322 | -4.8 | 1.4E-06 | 5.1E-06 |
| ENSG00000167037 | SGSM1           | small G protein signaling modulator 1 [Source:HGNC Symbol;Acc:HGNC:29410]                 | 170 | -0.70 | 0.1447 | -4.8 | 1.4E-06 | 5.2E-06 |
| ENSG00000265519 | ENSG00000265519 | novel transcript                                                                          | 55  | -1.24 | 0.2573 | -4.8 | 1.4E-06 | 5.2E-06 |
| ENSG00000143867 | OSR1            | odd-skipped related transcription factor 1 [Source:HGNC Symbol;Acc:HGNC:8111]             | 36  | -1.61 | 0.3334 | -4.8 | 1.4E-06 | 5.2E-06 |
| ENSG00000173535 | TNFRSF10C       | TNF receptor superfamily member 10c [Source:HGNC Symbol;Acc:HGNC:11906]                   | 14  | -3.16 | 0.6559 | -4.8 | 1.4E-06 | 5.3E-06 |
| ENSG00000160097 | FNDC5           | fibronectin type III domain containing 5 [Source:HGNC Symbol;Acc:HGNC:20240]              | 111 | -0.88 | 0.1830 | -4.8 | 1.4E-06 | 5.3E-06 |
| ENSG00000229028 | KRT223P         | keratin 223, pseudogene [Source:HGNC Symbol;Acc:HGNC:32968]                               | 8   | -6.29 | 1.3067 | -4.8 | 1.5E-06 | 5.5E-06 |
| ENSG00000165821 | SALL2           | spalt like transcription factor 2 [Source:HGNC Symbol;Acc:HGNC:10526]                     | 20  | -2.43 | 0.5052 | -4.8 | 1.5E-06 | 5.5E-06 |
| ENSG00000287776 | ENSG00000287776 | novel transcript                                                                          | 7   | -6.28 | 1.3051 | -4.8 | 1.5E-06 | 5.5E-06 |
| ENSG00000244274 | DBNDD2          | dysbindin domain containing 2 [Source:HGNC Symbol;Acc:HGNC:15881]                         | 18  | -2.42 | 0.5024 | -4.8 | 1.5E-06 | 5.6E-06 |
| ENSG00000167244 | IGF2            | insulin like growth factor 2 [Source:HGNC Symbol;Acc:HGNC:5466]                           | 12  | -6.03 | 1.2544 | -4.8 | 1.5E-06 | 5.7E-06 |
| ENSG00000184867 | ARMCX2          | armadillo repeat containing X-linked 2 [Source:HGNC Symbol;Acc:HGNC:16869]                | 33  | -1.65 | 0.3441 | -4.8 | 1.5E-06 | 5.7E-06 |
| ENSG00000251095 | ENSG00000251095 | novel transcript                                                                          | 14  | -3.19 | 0.6645 | -4.8 | 1.5E-06 | 5.8E-06 |
| ENSG00000163596 | ICA1L           | islet cell autoantigen 1 like [Source:HGNC Symbol;Acc:HGNC:14442]                         | 60  | -1.23 | 0.2556 | -4.8 | 1.6E-06 | 5.9E-06 |
| ENSG00000125378 | BMP4            | bone morphogenetic protein 4 [Source:HGNC Symbol;Acc:HGNC:1071]                           | 25  | -1.99 | 0.4134 | -4.8 | 1.6E-06 | 5.9E-06 |
| ENSG00000265246 | ENSG00000265246 | novel transcript                                                                          | 18  | -2.51 | 0.5230 | -4.8 | 1.6E-06 | 5.9E-06 |
| ENSG00000276805 | ENSG00000276805 | general transcription factor Iii (GTF2I) pseudogene                                       | 103 | -0.94 | 0.1960 | -4.8 | 1.6E-06 | 6.0E-06 |
| ENSG00000173214 | MFSD4B          | major facilitator superfamily domain containing 4B [Source:HGNC Symbol;Acc:HGNC:21053]    | 108 | -0.86 | 0.1795 | -4.8 | 1.6E-06 | 6.0E-06 |
| ENSG00000162490 | DRAXIN          | dorsal inhibitory axon guidance protein [Source:HGNC Symbol;Acc:HGNC:25054]               | 16  | -2.63 | 0.5486 | -4.8 | 1.6E-06 | 6.0E-06 |
| ENSG00000196376 | SLC35F1         | solute carrier family 35 member F1 [Source:HGNC Symbol;Acc:HGNC:21483]                    | 15  | -3.11 | 0.6481 | -4.8 | 1.6E-06 | 6.1E-06 |
| ENSG00000003989 | SLC7A2          | solute carrier family 7 member 2 [Source:HGNC Symbol;Acc:HGNC:11060]                      | 19  | -2.42 | 0.5048 | -4.8 | 1.6E-06 | 6.1E-06 |
| ENSG00000100987 | VSX1            | visual system homeobox 1 [Source:HGNC Symbol;Acc:HGNC:12723]                              | 13  | -3.80 | 0.7934 | -4.8 | 1.7E-06 | 6.2E-06 |
| ENSG00000088827 | SIGLEC1         | sialic acid binding Ig like lectin 1 [Source:HGNC Symbol;Acc:HGNC:11127]                  | 25  | -2.18 | 0.4559 | -4.8 | 1.8E-06 | 6.6E-06 |
| ENSG00000162409 | PRKAA2          | protein kinase AMP-activated catalytic subunit alpha 2 [Source:HGNC Symbol;Acc:HGNC:9377] | 59  | -1.22 | 0.2547 | -4.8 | 1.8E-06 | 6.8E-06 |
| ENSG0000010327  | STAB1           | stabilin 1 [Source:HGNC Symbol;Acc:HGNC:18628]                                            | 28  | -1.77 | 0.3719 | -4.8 | 1.9E-06 | 7.3E-06 |
| ENSG00000226332 | ENSG00000226332 | novel transcript                                                                          | 101 | -0.87 | 0.1836 | -4.7 | 2.0E-06 | 7.6E-06 |
| ENSG00000274211 | SOCS7           | suppressor of cytokine signaling 7 [Source:HGNC Symbol;Acc:HGNC:29846]                    | 275 | -0.55 | 0.1163 | -4.7 | 2.1E-06 | 7.8E-06 |
| ENSG00000269887 | ENSG00000269887 | novel transcript, sense intronic to PBX1                                                  | 17  | -2.54 | 0.5368 | -4.7 | 2.1E-06 | 7.9E-06 |
| ENSG00000185507 | IRF7            | interferon regulatory factor 7 [Source:HGNC Symbol;Acc:HGNC:6122]                         | 17  | -2.65 | 0.5604 | -4.7 | 2.2E-06 | 8.0E-06 |
| ENSG00000285103 | ENSG00000285103 | novel transcript                                                                          | 53  | -1.24 | 0.2612 | -4.7 | 2.2E-06 | 8.3E-06 |
| ENSG00000109738 | GLRB            | glycine receptor beta [Source:HGNC Symbol;Acc:HGNC:4329]                                  | 132 | -0.82 | 0.1730 | -4.7 | 2.3E-06 | 8.4E-06 |

|                 |                 |                                                                                                                    |     |       |        |      |         |         |
|-----------------|-----------------|--------------------------------------------------------------------------------------------------------------------|-----|-------|--------|------|---------|---------|
| ENSG00000169474 | SPRR1A          | small proline rich protein 1A [Source:HGNC Symbol;Acc:HGNC:11259]                                                  | 20  | -2.34 | 0.4959 | -4.7 | 2.3E-06 | 8.5E-06 |
| ENSG00000229807 | XIST            | X inactive specific transcript [Source:HGNC Symbol;Acc:HGNC:12810]                                                 | 14  | -2.91 | 0.6156 | -4.7 | 2.3E-06 | 8.5E-06 |
| ENSG00000233834 | ENSG00000233834 | novel transcript                                                                                                   | 68  | -1.13 | 0.2398 | -4.7 | 2.3E-06 | 8.6E-06 |
| ENSG00000141337 | ARSG            | arylsulfatase G [Source:HGNC Symbol;Acc:HGNC:24102]                                                                | 49  | -1.33 | 0.2817 | -4.7 | 2.3E-06 | 8.7E-06 |
| ENSG00000223396 | RPS10P7         | ribosomal protein S10 pseudogene 7 [Source:HGNC Symbol;Acc:HGNC:36423]                                             | 93  | -0.96 | 0.2027 | -4.7 | 2.4E-06 | 9.0E-06 |
| ENSG00000166426 | CRABP1          | cellular retinoic acid binding protein 1 [Source:HGNC Symbol;Acc:HGNC:2338]                                        | 13  | -5.20 | 1.1023 | -4.7 | 2.4E-06 | 9.0E-06 |
| ENSG00000230943 | LINC02541       | long intergenic non-protein coding RNA 2541 [Source:HGNC Symbol;Acc:HGNC:53574]                                    | 29  | -1.80 | 0.3821 | -4.7 | 2.4E-06 | 9.0E-06 |
| ENSG00000164659 | ELAPOR2         | endosome-lysosome associated apoptosis and autophagy regulator family member 2 [Source:HGNC Symbol;Acc:HGNC:12810] | 104 | -0.90 | 0.1905 | -4.7 | 2.5E-06 | 9.1E-06 |
| ENSG00000079335 | CDC14A          | cell division cycle 14A [Source:HGNC Symbol;Acc:HGNC:1718]                                                         | 306 | -0.51 | 0.1091 | -4.7 | 2.5E-06 | 9.1E-06 |
| ENSG00000277476 | ENSG00000277476 | novel transcript                                                                                                   | 25  | -1.91 | 0.4052 | -4.7 | 2.5E-06 | 9.1E-06 |
| ENSG00000187848 | P2RX2           | purinergic receptor P2X 2 [Source:HGNC Symbol;Acc:HGNC:15459]                                                      | 14  | -3.14 | 0.6683 | -4.7 | 2.5E-06 | 9.3E-06 |
| ENSG00000261371 | PECAM1          | platelet and endothelial cell adhesion molecule 1 [Source:HGNC Symbol;Acc:HGNC:8823]                               | 43  | -1.50 | 0.3195 | -4.7 | 2.5E-06 | 9.4E-06 |
| ENSG00000235770 | LINC00607       | long intergenic non-protein coding RNA 607 [Source:HGNC Symbol;Acc:HGNC:43944]                                     | 13  | -5.20 | 1.1056 | -4.7 | 2.6E-06 | 9.4E-06 |
| ENSG00000244716 | ENSG00000244716 | ribosomal protein L17 (RPL17) pseudogene                                                                           | 179 | -0.65 | 0.1389 | -4.7 | 2.6E-06 | 9.7E-06 |
| ENSG00000158560 | DYNC111         | dynein cytoplasmic 1 intermediate chain 1 [Source:HGNC Symbol;Acc:HGNC:2963]                                       | 20  | -2.16 | 0.4618 | -4.7 | 2.8E-06 | 1.0E-05 |
| ENSG00000213190 | MLLT11          | MLLT11 transcription factor 7 cofactor [Source:HGNC Symbol;Acc:HGNC:16997]                                         | 183 | -0.65 | 0.1380 | -4.7 | 2.8E-06 | 1.0E-05 |
| ENSG00000198626 | RYR2            | ryanodine receptor 2 [Source:HGNC Symbol;Acc:HGNC:10484]                                                           | 12  | -4.02 | 0.8586 | -4.7 | 2.9E-06 | 1.1E-05 |
| ENSG00000172824 | CES4A           | carboxylesterase 4A [Source:HGNC Symbol;Acc:HGNC:26741]                                                            | 182 | -0.66 | 0.1413 | -4.7 | 2.9E-06 | 1.1E-05 |
| ENSG00000100330 | MTMR3           | myotubularin related protein 3 [Source:HGNC Symbol;Acc:HGNC:7451]                                                  | 107 | -0.90 | 0.1932 | -4.7 | 2.9E-06 | 1.1E-05 |
| ENSG00000286587 | ENSG00000286587 | novel transcript                                                                                                   | 11  | -5.90 | 1.2621 | -4.7 | 2.9E-06 | 1.1E-05 |
| ENSG00000009790 | TRAF3IP3        | TRAF3 interacting protein 3 [Source:HGNC Symbol;Acc:HGNC:30766]                                                    | 15  | -2.76 | 0.5902 | -4.7 | 2.9E-06 | 1.1E-05 |
| ENSG00000163909 | HEYL            | hes related family bHLH transcription factor with YRPW motif like [Source:HGNC Symbol;Acc:HGNC:488]                | 66  | -1.10 | 0.2356 | -4.7 | 3.0E-06 | 1.1E-05 |
| ENSG00000116132 | PRRX1           | paired related homeobox 1 [Source:HGNC Symbol;Acc:HGNC:9142]                                                       | 27  | -1.78 | 0.3815 | -4.7 | 3.0E-06 | 1.1E-05 |
| ENSG00000133739 | LRRCC1          | leucine rich repeat and coiled-coil centrosomal protein 1 [Source:HGNC Symbol;Acc:HGNC:29373]                      | 23  | -2.06 | 0.4414 | -4.7 | 3.0E-06 | 1.1E-05 |
| ENSG00000185989 | RASA3           | RAS p21 protein activator 3 [Source:HGNC Symbol;Acc:HGNC:20331]                                                    | 82  | -1.00 | 0.2137 | -4.7 | 3.2E-06 | 1.2E-05 |
| ENSG00000185811 | IKZF1           | IKAROS family zinc finger 1 [Source:HGNC Symbol;Acc:HGNC:13176]                                                    | 29  | -1.72 | 0.3689 | -4.7 | 3.2E-06 | 1.2E-05 |
| ENSG00000253796 | ENSG00000253796 | novel transcript                                                                                                   | 23  | -2.02 | 0.4346 | -4.7 | 3.2E-06 | 1.2E-05 |
| ENSG00000183317 | EPHA10          | EPH receptor A10 [Source:HGNC Symbol;Acc:HGNC:19987]                                                               | 126 | -0.79 | 0.1702 | -4.6 | 3.3E-06 | 1.2E-05 |
| ENSG00000229666 | MAST4-AS1       | MAST4 antisense RNA 1 [Source:HGNC Symbol;Acc:HGNC:40865]                                                          | 18  | -2.27 | 0.4894 | -4.6 | 3.4E-06 | 1.2E-05 |
| ENSG00000140092 | FBLN5           | fibulin 5 [Source:HGNC Symbol;Acc:HGNC:3602]                                                                       | 21  | -2.08 | 0.4477 | -4.6 | 3.4E-06 | 1.2E-05 |
| ENSG00000162687 | KCNT2           | potassium sodium-activated channel subfamily T member 2 [Source:HGNC Symbol;Acc:HGNC:18866]                        | 13  | -5.17 | 1.1135 | -4.6 | 3.4E-06 | 1.2E-05 |
| ENSG00000145526 | CDH18           | cadherin 18 [Source:HGNC Symbol;Acc:HGNC:1757]                                                                     | 13  | -3.12 | 0.6735 | -4.6 | 3.5E-06 | 1.3E-05 |
| ENSG00000228376 | GAS2L1P2        | growth arrest specific 2 like 1 pseudogene 2 [Source:HGNC Symbol;Acc:HGNC:27986]                                   | 12  | -4.39 | 0.9480 | -4.6 | 3.7E-06 | 1.3E-05 |
| ENSG00000274561 | ENSG00000274561 | novel transcript                                                                                                   | 17  | -2.52 | 0.5457 | -4.6 | 3.8E-06 | 1.4E-05 |
| ENSG00000197935 | ZNF311          | zinc finger protein 311 [Source:HGNC Symbol;Acc:HGNC:13847]                                                        | 16  | -2.57 | 0.5566 | -4.6 | 3.8E-06 | 1.4E-05 |
| ENSG00000156475 | PPP2R2B         | protein phosphatase 2 regulatory subunit Bbeta [Source:HGNC Symbol;Acc:HGNC:9305]                                  | 15  | -2.56 | 0.5545 | -4.6 | 3.9E-06 | 1.4E-05 |
| ENSG00000123329 | ARHGAP9         | Rho GTPase activating protein 9 [Source:HGNC Symbol;Acc:HGNC:14130]                                                | 17  | -2.40 | 0.5201 | -4.6 | 3.9E-06 | 1.4E-05 |
| ENSG00000254510 | ENSG00000254510 | novel transcript                                                                                                   | 20  | -2.13 | 0.4617 | -4.6 | 3.9E-06 | 1.4E-05 |
| ENSG00000181350 | LRRC75A         | leucine rich repeat containing 75A [Source:HGNC Symbol;Acc:HGNC:32403]                                             | 45  | -1.33 | 0.2893 | -4.6 | 4.0E-06 | 1.4E-05 |
| ENSG00000232021 | LEF1-AS1        | LEF1 antisense RNA 1 [Source:HGNC Symbol;Acc:HGNC:40339]                                                           | 7   | -6.10 | 1.3265 | -4.6 | 4.2E-06 | 1.5E-05 |
| ENSG00000123700 | KCNJ2           | potassium inwardly rectifying channel subfamily J member 2 [Source:HGNC Symbol;Acc:HGNC:6263]                      | 12  | -3.62 | 0.7879 | -4.6 | 4.3E-06 | 1.5E-05 |
| ENSG00000114646 | CSPG5           | chondroitin sulfate proteoglycan 5 [Source:HGNC Symbol;Acc:HGNC:2467]                                              | 130 | -0.80 | 0.1739 | -4.6 | 4.3E-06 | 1.6E-05 |

|                 |                 |                                                                                                    |     |       |        |      |         |         |
|-----------------|-----------------|----------------------------------------------------------------------------------------------------|-----|-------|--------|------|---------|---------|
| ENSG00000102879 | CORO1A          | coronin 1A [Source:HGNC Symbol;Acc:HGNC:2252]                                                      | 176 | -0.67 | 0.1464 | -4.6 | 4.3E-06 | 1.6E-05 |
| ENSG00000121933 | TMIGD3          | transmembrane and immunoglobulin domain containing 3 [Source:HGNC Symbol;Acc:HGNC:51375]           | 20  | -2.23 | 0.4866 | -4.6 | 4.4E-06 | 1.6E-05 |
| ENSG00000106069 | CHN2            | chimerin 2 [Source:HGNC Symbol;Acc:HGNC:1944]                                                      | 11  | -3.60 | 0.7835 | -4.6 | 4.5E-06 | 1.6E-05 |
| ENSG00000275764 | ENSG00000275764 | novel transcript                                                                                   | 75  | -0.99 | 0.2155 | -4.6 | 4.5E-06 | 1.6E-05 |
| ENSG00000160179 | ABCG1           | ATP binding cassette subfamily G member 1 [Source:HGNC Symbol;Acc:HGNC:73]                         | 31  | -1.67 | 0.3645 | -4.6 | 4.5E-06 | 1.6E-05 |
| ENSG00000286451 | ENSG00000286451 | novel transcript                                                                                   | 18  | -2.36 | 0.5152 | -4.6 | 4.6E-06 | 1.7E-05 |
| ENSG00000158270 | COLEC12         | collectin subfamily member 12 [Source:HGNC Symbol;Acc:HGNC:16016]                                  | 20  | -2.19 | 0.4769 | -4.6 | 4.6E-06 | 1.7E-05 |
| ENSG00000136274 | NACAD           | NAC alpha domain containing [Source:HGNC Symbol;Acc:HGNC:22196]                                    | 29  | -1.85 | 0.4043 | -4.6 | 4.7E-06 | 1.7E-05 |
| ENSG00000253414 | LINC01605       | long intergenic non-protein coding RNA 1605 [Source:NCBI gene (formerly Entrezgene);Acc:100507420] | 7   | -6.09 | 1.3305 | -4.6 | 4.7E-06 | 1.7E-05 |
| ENSG00000228956 | SATB1-AS1       | SATB1 antisense RNA 1 [Source:HGNC Symbol;Acc:HGNC:50687]                                          | 11  | -5.81 | 1.2703 | -4.6 | 4.7E-06 | 1.7E-05 |
| ENSG00000233379 | ENSG00000233379 | novel transcript                                                                                   | 14  | -2.84 | 0.6204 | -4.6 | 4.7E-06 | 1.7E-05 |
| ENSG00000136144 | RCBTB1          | RCC1 and BTB domain containing protein 1 [Source:HGNC Symbol;Acc:HGNC:18243]                       | 137 | -0.74 | 0.1622 | -4.6 | 4.7E-06 | 1.7E-05 |
| ENSG00000048540 | LMO3            | LIM domain only 3 [Source:HGNC Symbol;Acc:HGNC:6643]                                               | 12  | -5.10 | 1.1141 | -4.6 | 4.8E-06 | 1.7E-05 |
| ENSG00000168243 | GNG4            | G protein subunit gamma 4 [Source:HGNC Symbol;Acc:HGNC:4407]                                       | 88  | -0.91 | 0.1984 | -4.6 | 4.8E-06 | 1.7E-05 |
| ENSG00000133475 | GGT2            | gamma-glutamyltransferase 2 [Source:HGNC Symbol;Acc:HGNC:4251]                                     | 12  | -5.11 | 1.1176 | -4.6 | 4.9E-06 | 1.8E-05 |
| ENSG00000263946 | ENSG00000263946 | chromosome 2 open reading frame 27B (C2orf27B) pseudogene                                          | 12  | -3.64 | 0.7976 | -4.6 | 5.0E-06 | 1.8E-05 |
| ENSG00000136859 | ANGPTL2         | angiopoietin like 2 [Source:HGNC Symbol;Acc:HGNC:490]                                              | 18  | -2.26 | 0.4965 | -4.6 | 5.1E-06 | 1.8E-05 |
| ENSG00000272341 | ENSG00000272341 | novel transcript                                                                                   | 109 | -0.82 | 0.1803 | -4.6 | 5.1E-06 | 1.8E-05 |
| ENSG00000143995 | MEIS1           | Meis homeobox 1 [Source:HGNC Symbol;Acc:HGNC:7000]                                                 | 198 | -0.62 | 0.1370 | -4.6 | 5.1E-06 | 1.8E-05 |
| ENSG00000135424 | ITGA7           | integrin subunit alpha 7 [Source:HGNC Symbol;Acc:HGNC:6143]                                        | 82  | -0.98 | 0.2141 | -4.6 | 5.3E-06 | 1.9E-05 |
| ENSG00000149781 | FERMT3          | fermitin family member 3 [Source:HGNC Symbol;Acc:HGNC:23151]                                       | 61  | -1.12 | 0.2455 | -4.5 | 5.4E-06 | 1.9E-05 |
| ENSG00000070915 | SLC12A3         | solute carrier family 12 member 3 [Source:HGNC Symbol;Acc:HGNC:10912]                              | 25  | -1.82 | 0.4003 | -4.5 | 5.5E-06 | 2.0E-05 |
| ENSG00000016402 | IL20RA          | interleukin 20 receptor subunit alpha [Source:HGNC Symbol;Acc:HGNC:6003]                           | 13  | -3.25 | 0.7144 | -4.5 | 5.5E-06 | 2.0E-05 |
| ENSG00000196361 | ELAVL3          | ELAV like RNA binding protein 3 [Source:HGNC Symbol;Acc:HGNC:3314]                                 | 12  | -3.02 | 0.6641 | -4.5 | 5.5E-06 | 2.0E-05 |
| ENSG00000287086 | ENSG00000287086 | novel transcript, antisense to VHL                                                                 | 152 | -0.71 | 0.1572 | -4.5 | 5.6E-06 | 2.0E-05 |
| ENSG00000176387 | HSD11B2         | hydroxysteroid 11-beta dehydrogenase 2 [Source:HGNC Symbol;Acc:HGNC:5209]                          | 57  | -1.15 | 0.2543 | -4.5 | 5.6E-06 | 2.0E-05 |
| ENSG00000134121 | CHL1            | cell adhesion molecule L1 like [Source:HGNC Symbol;Acc:HGNC:1939]                                  | 19  | -2.41 | 0.5310 | -4.5 | 5.6E-06 | 2.0E-05 |
| ENSG00000151702 | FLI1            | Fli-1 proto-oncogene, ETS transcription factor [Source:HGNC Symbol;Acc:HGNC:3749]                  | 18  | -2.30 | 0.5074 | -4.5 | 5.7E-06 | 2.0E-05 |
| ENSG00000102755 | FLT1            | fms related receptor tyrosine kinase 1 [Source:HGNC Symbol;Acc:HGNC:3763]                          | 22  | -1.98 | 0.4362 | -4.5 | 5.7E-06 | 2.0E-05 |
| ENSG00000125962 | ARMCX5          | armadillo repeat containing X-linked 5 [Source:HGNC Symbol;Acc:HGNC:25772]                         | 228 | -0.60 | 0.1322 | -4.5 | 5.7E-06 | 2.0E-05 |
| ENSG00000159164 | SV2A            | synaptic vesicle glycoprotein 2A [Source:HGNC Symbol;Acc:HGNC:20566]                               | 26  | -1.80 | 0.3960 | -4.5 | 5.7E-06 | 2.0E-05 |
| ENSG00000132840 | BHMT2           | betaine--homocysteine S-methyltransferase 2 [Source:HGNC Symbol;Acc:HGNC:1048]                     | 6   | -6.02 | 1.3276 | -4.5 | 5.9E-06 | 2.1E-05 |
| ENSG00000285867 | ENSG00000285867 | Novel transcript                                                                                   | 47  | -1.35 | 0.2969 | -4.5 | 5.9E-06 | 2.1E-05 |
| ENSG00000095539 | SEMA4G          | semaphorin 4G [Source:HGNC Symbol;Acc:HGNC:10735]                                                  | 76  | -0.98 | 0.2159 | -4.5 | 5.9E-06 | 2.1E-05 |
| ENSG00000244486 | SCARF2          | scavenger receptor class F member 2 [Source:HGNC Symbol;Acc:HGNC:19869]                            | 60  | -1.13 | 0.2490 | -4.5 | 5.9E-06 | 2.1E-05 |
| ENSG00000185862 | EVI2B           | ecotropic viral integration site 2B [Source:HGNC Symbol;Acc:HGNC:3500]                             | 16  | -2.50 | 0.5526 | -4.5 | 5.9E-06 | 2.1E-05 |
| ENSG00000283839 | ENSG00000283839 | novel transcript, antisense to ZNF804A                                                             | 6   | -6.01 | 1.3284 | -4.5 | 6.0E-06 | 2.1E-05 |
| ENSG00000235501 | CNN3-DT         | CNN3 divergent transcript [Source:HGNC Symbol;Acc:HGNC:54176]                                      | 68  | -1.07 | 0.2373 | -4.5 | 6.0E-06 | 2.1E-05 |
| ENSG00000091972 | CD200           | CD200 molecule [Source:HGNC Symbol;Acc:HGNC:7203]                                                  | 10  | -5.74 | 1.2707 | -4.5 | 6.4E-06 | 2.3E-05 |
| ENSG00000163221 | S100A12         | S100 calcium binding protein A12 [Source:HGNC Symbol;Acc:HGNC:10489]                               | 49  | -1.28 | 0.2841 | -4.5 | 6.4E-06 | 2.3E-05 |
| ENSG00000187116 | LILRA5          | leukocyte immunoglobulin like receptor A5 [Source:HGNC Symbol;Acc:HGNC:16309]                      | 17  | -2.53 | 0.5606 | -4.5 | 6.6E-06 | 2.3E-05 |
| ENSG00000197629 | MPEG1           | macrophage expressed 1 [Source:HGNC Symbol;Acc:HGNC:29619]                                         | 12  | -3.20 | 0.7093 | -4.5 | 6.6E-06 | 2.3E-05 |

|                 |            |                                                                                                |     |       |        |      |         |         |
|-----------------|------------|------------------------------------------------------------------------------------------------|-----|-------|--------|------|---------|---------|
| ENSG00000143851 | PTPN7      | protein tyrosine phosphatase non-receptor type 7 [Source:HGNC Symbol;Acc:HGNC:9659]            | 21  | -2.01 | 0.4466 | -4.5 | 6.6E-06 | 2.3E-05 |
| ENSG00000248092 | NNT-AS1    | NNT antisense RNA 1 [Source:HGNC Symbol;Acc:HGNC:49005]                                        | 23  | -1.96 | 0.4353 | -4.5 | 6.6E-06 | 2.3E-05 |
| NA              | 9          | NA                                                                                             | 11  | -3.88 | 0.8619 | -4.5 | 6.8E-06 | 2.4E-05 |
| ENSG00000232444 | ENSG000002 | novel transcript                                                                               | 6   | -6.00 | 1.3340 | -4.5 | 6.8E-06 | 2.4E-05 |
| ENSG00000196460 | RFX8       | regulatory factor X8 [Source:HGNC Symbol;Acc:HGNC:37253]                                       | 6   | -5.99 | 1.3307 | -4.5 | 6.8E-06 | 2.4E-05 |
| ENSG00000064199 | SPA17      | sperm autoantigenic protein 17 [Source:HGNC Symbol;Acc:HGNC:11210]                             | 42  | -1.35 | 0.2994 | -4.5 | 6.8E-06 | 2.4E-05 |
| ENSG00000283071 | LBHD2      | LBH domain containing 2 [Source:HGNC Symbol;Acc:HGNC:52384]                                    | 14  | -2.83 | 0.6298 | -4.5 | 6.9E-06 | 2.4E-05 |
| ENSG00000213390 | ARHGAP19   | Rho GTPase activating protein 19 [Source:HGNC Symbol;Acc:HGNC:23724]                           | 337 | -0.51 | 0.1141 | -4.5 | 7.1E-06 | 2.5E-05 |
| ENSG00000137868 | STRA6      | signaling receptor and transporter of retinol STRA6 [Source:HGNC Symbol;Acc:HGNC:30650]        | 11  | -3.33 | 0.7411 | -4.5 | 7.1E-06 | 2.5E-05 |
| ENSG00000154864 | PIEZO2     | piezo type mechanosensitive ion channel component 2 [Source:HGNC Symbol;Acc:HGNC:26270]        | 10  | -5.72 | 1.2731 | -4.5 | 7.1E-06 | 2.5E-05 |
| ENSG00000136014 | USP44      | ubiquitin specific peptidase 44 [Source:HGNC Symbol;Acc:HGNC:20064]                            | 25  | -1.88 | 0.4187 | -4.5 | 7.3E-06 | 2.6E-05 |
| ENSG00000176040 | TMPRSS7    | transmembrane serine protease 7 [Source:HGNC Symbol;Acc:HGNC:30846]                            | 13  | -2.92 | 0.6507 | -4.5 | 7.4E-06 | 2.6E-05 |
| ENSG00000072952 | IRAG1      | inositol 1,4,5-triphosphate receptor associated 1 [Source:HGNC Symbol;Acc:HGNC:7237]           | 20  | -2.09 | 0.4671 | -4.5 | 7.4E-06 | 2.6E-05 |
| ENSG00000039600 | SOX30      | SRY-box transcription factor 30 [Source:HGNC Symbol;Acc:HGNC:30635]                            | 11  | -3.92 | 0.8754 | -4.5 | 7.7E-06 | 2.7E-05 |
| ENSG00000145358 | DDIT4L     | DNA damage inducible transcript 4 like [Source:HGNC Symbol;Acc:HGNC:30555]                     | 39  | -1.41 | 0.3153 | -4.5 | 7.8E-06 | 2.7E-05 |
| ENSG00000255282 | WTAPP1     | Wilms tumor 1 associated protein pseudogene 1 [Source:HGNC Symbol;Acc:HGNC:44115]              | 11  | -4.30 | 0.9627 | -4.5 | 7.8E-06 | 2.7E-05 |
| ENSG00000163082 | SGPP2      | sphingosine-1-phosphate phosphatase 2 [Source:HGNC Symbol;Acc:HGNC:19953]                      | 51  | -1.17 | 0.2616 | -4.5 | 8.0E-06 | 2.8E-05 |
| ENSG00000105697 | HAMP       | hepcidin antimicrobial peptide [Source:HGNC Symbol;Acc:HGNC:15598]                             | 11  | -3.92 | 0.8779 | -4.5 | 8.0E-06 | 2.8E-05 |
| ENSG00000007372 | PAX6       | paired box 6 [Source:HGNC Symbol;Acc:HGNC:8620]                                                | 212 | -0.57 | 0.1278 | -4.5 | 8.2E-06 | 2.9E-05 |
| ENSG00000171724 | VAT1L      | vesicle amine transport 1 like [Source:HGNC Symbol;Acc:HGNC:29315]                             | 13  | -2.81 | 0.6307 | -4.5 | 8.3E-06 | 2.9E-05 |
| ENSG00000114626 | ABTB1      | ankyrin repeat and BTB domain containing 1 [Source:HGNC Symbol;Acc:HGNC:18275]                 | 175 | -0.65 | 0.1451 | -4.5 | 8.4E-06 | 2.9E-05 |
| ENSG00000171860 | C3AR1      | complement C3a receptor 1 [Source:HGNC Symbol;Acc:HGNC:1319]                                   | 21  | -2.06 | 0.4617 | -4.5 | 8.4E-06 | 2.9E-05 |
| ENSG00000082512 | TRAF5      | TNF receptor associated factor 5 [Source:HGNC Symbol;Acc:HGNC:12035]                           | 90  | -0.89 | 0.1999 | -4.4 | 8.7E-06 | 3.0E-05 |
| ENSG00000152785 | BMP3       | bone morphogenetic protein 3 [Source:HGNC Symbol;Acc:HGNC:1070]                                | 6   | -6.00 | 1.3486 | -4.4 | 8.8E-06 | 3.1E-05 |
| ENSG00000134569 | LRP4       | LDL receptor related protein 4 [Source:HGNC Symbol;Acc:HGNC:6696]                              | 160 | -0.66 | 0.1476 | -4.4 | 8.8E-06 | 3.1E-05 |
| ENSG00000134901 | POGLUT2    | protein O-glucosyltransferase 2 [Source:HGNC Symbol;Acc:HGNC:19350]                            | 163 | -0.65 | 0.1467 | -4.4 | 8.8E-06 | 3.1E-05 |
| ENSG00000168918 | INPP5D     | inositol polyphosphate-5-phosphatase D [Source:HGNC Symbol;Acc:HGNC:6079]                      | 27  | -1.78 | 0.4014 | -4.4 | 8.9E-06 | 3.1E-05 |
| ENSG00000135439 | AGAP2      | ArfGAP with GTPase domain, ankyrin repeat and PH domain 2 [Source:HGNC Symbol;Acc:HGNC:16921]  | 75  | -2.01 | 0.4532 | -4.4 | 9.2E-06 | 3.2E-05 |
| ENSG00000107518 | ATRNL1     | attractin like 1 [Source:HGNC Symbol;Acc:HGNC:29063]                                           | 109 | -0.82 | 0.1841 | -4.4 | 9.2E-06 | 3.2E-05 |
| ENSG00000157765 | SLC34A2    | solute carrier family 34 member 2 [Source:HGNC Symbol;Acc:HGNC:11020]                          | 11  | -4.99 | 1.1263 | -4.4 | 9.4E-06 | 3.3E-05 |
| ENSG00000121454 | LHX4       | LIM homeobox 4 [Source:HGNC Symbol;Acc:HGNC:21734]                                             | 48  | -1.21 | 0.2728 | -4.4 | 9.4E-06 | 3.3E-05 |
| ENSG00000148082 | SHC3       | SHC adaptor protein 3 [Source:HGNC Symbol;Acc:HGNC:18181]                                      | 35  | -1.41 | 0.3195 | -4.4 | 9.5E-06 | 3.3E-05 |
| ENSG00000080007 | DDX43      | DEAD-box helicase 43 [Source:HGNC Symbol;Acc:HGNC:18677]                                       | 185 | -0.66 | 0.1500 | -4.4 | 9.7E-06 | 3.4E-05 |
| ENSG00000275793 | RIMBP3     | RIMS binding protein 3 [Source:HGNC Symbol;Acc:HGNC:29344]                                     | 32  | -1.60 | 0.3618 | -4.4 | 9.8E-06 | 3.4E-05 |
| ENSG00000188315 | C3orf62    | chromosome 3 open reading frame 62 [Source:HGNC Symbol;Acc:HGNC:24771]                         | 161 | -0.65 | 0.1481 | -4.4 | 9.8E-06 | 3.4E-05 |
| ENSG00000144712 | CAND2      | cullin associated and neddylation dissociated 2 (putative) [Source:HGNC Symbol;Acc:HGNC:30689] | 27  | -1.78 | 0.4023 | -4.4 | 9.9E-06 | 3.4E-05 |
| ENSG00000146409 | SLC18B1    | solute carrier family 18 member B1 [Source:HGNC Symbol;Acc:HGNC:21573]                         | 103 | -0.83 | 0.1879 | -4.4 | 9.9E-06 | 3.4E-05 |
| ENSG00000179859 | RNF227     | ring finger protein 227 [Source:HGNC Symbol;Acc:HGNC:27571]                                    | 95  | -0.86 | 0.1939 | -4.4 | 1.0E-05 | 3.5E-05 |
| ENSG00000100271 | TLL1       | tubulin tyrosine ligase like 1 [Source:HGNC Symbol;Acc:HGNC:1312]                              | 87  | -0.94 | 0.2123 | -4.4 | 1.0E-05 | 3.6E-05 |
| ENSG00000188452 | CERKL      | ceramide kinase like [Source:HGNC Symbol;Acc:HGNC:21699]                                       | 16  | -2.30 | 0.5225 | -4.4 | 1.0E-05 | 3.6E-05 |
| ENSG00000164048 | ZNF589     | zinc finger protein 589 [Source:HGNC Symbol;Acc:HGNC:16747]                                    | 256 | -0.52 | 0.1181 | -4.4 | 1.0E-05 | 3.6E-05 |
| ENSG00000019549 | SNAI2      | snail family transcriptional repressor 2 [Source:HGNC Symbol;Acc:HGNC:11094]                   | 82  | -0.95 | 0.2154 | -4.4 | 1.0E-05 | 3.6E-05 |

|                 |            |                                                                                              |     |       |        |      |         |         |
|-----------------|------------|----------------------------------------------------------------------------------------------|-----|-------|--------|------|---------|---------|
| ENSG00000155629 | PIK3AP1    | phosphoinositide-3-kinase adaptor protein 1 [Source:HGNC Symbol;Acc:HGNC:30034]              | 59  | -1.09 | 0.2466 | -4.4 | 1.0E-05 | 3.6E-05 |
| ENSG00000185187 | SIGIRR     | single Ig and TIR domain containing [Source:HGNC Symbol;Acc:HGNC:30575]                      | 109 | -0.80 | 0.1826 | -4.4 | 1.1E-05 | 3.7E-05 |
| ENSG00000151715 | TMEM45B    | transmembrane protein 45B [Source:HGNC Symbol;Acc:HGNC:25194]                                | 40  | -1.38 | 0.3130 | -4.4 | 1.1E-05 | 3.7E-05 |
| ENSG00000234262 | ENSG000002 | small proline-rich protein 3 (SPRR3) pseudogene                                              | 11  | -4.92 | 1.1170 | -4.4 | 1.1E-05 | 3.7E-05 |
| ENSG00000100979 | PLTP       | phospholipid transfer protein [Source:HGNC Symbol;Acc:HGNC:9093]                             | 44  | -1.39 | 0.3165 | -4.4 | 1.1E-05 | 3.8E-05 |
| ENSG00000170160 | CCDC144A   | coiled-coil domain containing 144A [Source:HGNC Symbol;Acc:HGNC:29072]                       | 13  | -2.77 | 0.6307 | -4.4 | 1.1E-05 | 3.8E-05 |
| ENSG0000010295  | IFFO1      | intermediate filament family orphan 1 [Source:HGNC Symbol;Acc:HGNC:24970]                    | 26  | -1.67 | 0.3803 | -4.4 | 1.2E-05 | 4.0E-05 |
| ENSG00000143067 | ZNF697     | zinc finger protein 697 [Source:HGNC Symbol;Acc:HGNC:32034]                                  | 198 | -0.61 | 0.1383 | -4.4 | 1.2E-05 | 4.0E-05 |
| ENSG00000152782 | PANK1      | pantothenate kinase 1 [Source:HGNC Symbol;Acc:HGNC:8598]                                     | 222 | -0.56 | 0.1286 | -4.4 | 1.2E-05 | 4.2E-05 |
| ENSG00000286124 | ENSG000002 | novel transcript                                                                             | 6   | -5.89 | 1.3454 | -4.4 | 1.2E-05 | 4.2E-05 |
| ENSG00000225255 | PSLNR      | prostate enriched lncRNA [Source:HGNC Symbol;Acc:HGNC:54405]                                 | 52  | -1.15 | 0.2636 | -4.4 | 1.2E-05 | 4.2E-05 |
| ENSG00000206140 | TMEM191C   | transmembrane protein 191C [Source:HGNC Symbol;Acc:HGNC:33601]                               | 46  | -1.32 | 0.3028 | -4.4 | 1.2E-05 | 4.2E-05 |
| ENSG00000116771 | AGMAT      | agmatinase [Source:HGNC Symbol;Acc:HGNC:18407]                                               | 109 | -0.77 | 0.1772 | -4.4 | 1.2E-05 | 4.2E-05 |
| ENSG0000013297  | CLDN11     | claudin 11 [Source:HGNC Symbol;Acc:HGNC:8514]                                                | 22  | -1.86 | 0.4264 | -4.4 | 1.2E-05 | 4.3E-05 |
| ENSG00000159784 | FAM131B    | family with sequence similarity 131 member B [Source:HGNC Symbol;Acc:HGNC:22202]             | 17  | -2.27 | 0.5196 | -4.4 | 1.2E-05 | 4.3E-05 |
| ENSG00000274712 | ENSG000002 | bromodomain PHD finger transcription factor (BPTF) pseudogene                                | 36  | -1.39 | 0.3187 | -4.4 | 1.3E-05 | 4.3E-05 |
| ENSG00000134769 | DTNA       | dystrobrevin alpha [Source:HGNC Symbol;Acc:HGNC:3057]                                        | 32  | -1.55 | 0.3541 | -4.4 | 1.3E-05 | 4.4E-05 |
| ENSG00000275234 | ENSG000002 | novel transcript, antisense to DENND1C                                                       | 24  | -1.79 | 0.4111 | -4.4 | 1.3E-05 | 4.4E-05 |
| ENSG00000261072 | ENSG000002 | hydroxyacyl-CoA dehydrogenase (HADH) pseudogene                                              | 11  | -3.09 | 0.7082 | -4.4 | 1.3E-05 | 4.5E-05 |
| ENSG00000101850 | GPR143     | G protein-coupled receptor 143 [Source:HGNC Symbol;Acc:HGNC:20145]                           | 13  | -2.74 | 0.6282 | -4.4 | 1.3E-05 | 4.5E-05 |
| ENSG00000149557 | FEZ1       | fasciculation and elongation protein zeta 1 [Source:HGNC Symbol;Acc:HGNC:3659]               | 34  | -1.49 | 0.3409 | -4.4 | 1.3E-05 | 4.5E-05 |
| ENSG00000198879 | SFMBT2     | Scm like with four mbt domains 2 [Source:HGNC Symbol;Acc:HGNC:20256]                         | 24  | -1.76 | 0.4047 | -4.4 | 1.3E-05 | 4.6E-05 |
| ENSG00000163093 | BBS5       | Bardet-Biedl syndrome 5 [Source:HGNC Symbol;Acc:HGNC:970]                                    | 122 | -0.79 | 0.1826 | -4.4 | 1.4E-05 | 4.6E-05 |
| ENSG00000185513 | L3MBTL1    | L3MBTL histone methyl-lysine binding protein 1 [Source:HGNC Symbol;Acc:HGNC:15905]           | 114 | -0.76 | 0.1741 | -4.3 | 1.4E-05 | 4.7E-05 |
| ENSG00000186710 | CFAP73     | cilia and flagella associated protein 73 [Source:HGNC Symbol;Acc:HGNC:37100]                 | 21  | -1.93 | 0.4432 | -4.3 | 1.4E-05 | 4.7E-05 |
| ENSG00000182511 | FES        | FES proto-oncogene, tyrosine kinase [Source:HGNC Symbol;Acc:HGNC:3657]                       | 25  | -1.70 | 0.3903 | -4.3 | 1.4E-05 | 4.7E-05 |
| ENSG00000287430 | ENSG000002 | novel transcript                                                                             | 10  | -4.24 | 0.9752 | -4.3 | 1.4E-05 | 4.8E-05 |
| ENSG00000136895 | GARNL3     | GTPase activating Rap/RanGAP domain like 3 [Source:HGNC Symbol;Acc:HGNC:25425]               | 19  | -2.05 | 0.4726 | -4.3 | 1.4E-05 | 4.8E-05 |
| ENSG00000225489 | ENSG000002 | novel transcript                                                                             | 56  | -1.07 | 0.2467 | -4.3 | 1.4E-05 | 4.8E-05 |
| ENSG00000273033 | LINC02035  | long intergenic non-protein coding RNA 2035 [Source:HGNC Symbol;Acc:HGNC:52875]              | 30  | -1.60 | 0.3688 | -4.3 | 1.4E-05 | 4.9E-05 |
| ENSG00000149599 | DUSP15     | dual specificity phosphatase 15 [Source:HGNC Symbol;Acc:HGNC:16236]                          | 40  | -1.32 | 0.3036 | -4.3 | 1.4E-05 | 4.9E-05 |
| ENSG00000163577 | EIF5A2     | eukaryotic translation initiation factor 5A2 [Source:HGNC Symbol;Acc:HGNC:3301]              | 141 | -0.68 | 0.1568 | -4.3 | 1.5E-05 | 5.0E-05 |
| ENSG00000128596 | CCDC136    | coiled-coil domain containing 136 [Source:HGNC Symbol;Acc:HGNC:22225]                        | 51  | -1.17 | 0.2691 | -4.3 | 1.5E-05 | 5.0E-05 |
| ENSG00000157303 | SUSD3      | sushi domain containing 3 [Source:HGNC Symbol;Acc:HGNC:28391]                                | 11  | -3.29 | 0.7610 | -4.3 | 1.5E-05 | 5.1E-05 |
| ENSG00000154310 | TNFK       | TRAF2 and NCK interacting kinase [Source:HGNC Symbol;Acc:HGNC:30765]                         | 21  | -2.04 | 0.4725 | -4.3 | 1.5E-05 | 5.1E-05 |
| ENSG00000006059 | KRT33A     | keratin 33A [Source:HGNC Symbol;Acc:HGNC:6450]                                               | 6   | -5.87 | 1.3566 | -4.3 | 1.5E-05 | 5.1E-05 |
| ENSG00000159189 | C1QC       | complement C1q C chain [Source:HGNC Symbol;Acc:HGNC:1245]                                    | 140 | -1.96 | 0.4520 | -4.3 | 1.5E-05 | 5.2E-05 |
| ENSG00000114200 | BCHE       | butyrylcholinesterase [Source:HGNC Symbol;Acc:HGNC:983]                                      | 10  | -3.46 | 0.8005 | -4.3 | 1.5E-05 | 5.2E-05 |
| ENSG00000234520 | HRAT17     | heart tissue-associated transcript 17 [Source:NCBI gene (formerly Entrezgene);Acc:101928036] | 19  | -2.22 | 0.5144 | -4.3 | 1.5E-05 | 5.2E-05 |
| ENSG00000106772 | PRUNE2     | prune homolog 2 with BCH domain [Source:HGNC Symbol;Acc:HGNC:25209]                          | 54  | -1.15 | 0.2648 | -4.3 | 1.5E-05 | 5.2E-05 |
| ENSG00000079337 | RAPGEF3    | Rap guanine nucleotide exchange factor 3 [Source:HGNC Symbol;Acc:HGNC:16629]                 | 125 | -0.77 | 0.1781 | -4.3 | 1.5E-05 | 5.2E-05 |
| ENSG00000267879 | ENSG000002 | novel transcript, antisense to KLK6, KLK7, KLK8 and KLK9                                     | 15  | -2.45 | 0.5677 | -4.3 | 1.5E-05 | 5.2E-05 |



|                 |                 |                                                                                        |     |       |        |      |         |         |
|-----------------|-----------------|----------------------------------------------------------------------------------------|-----|-------|--------|------|---------|---------|
| ENSG00000133574 | GIMAP4          | GTPase, IMAP family member 4 [Source:HGNC Symbol;Acc:HGNC:21872]                       | 11  | -3.28 | 0.7585 | -4.3 | 1.5E-05 | 5.2E-05 |
| ENSG00000278023 | RDM1            | RAD52 motif containing 1 [Source:HGNC Symbol;Acc:HGNC:19950]                           | 62  | -1.04 | 0.2411 | -4.3 | 1.6E-05 | 5.3E-05 |
| ENSG00000255571 | MIR9-3HG        | MIR9-3 host gene [Source:HGNC Symbol;Acc:HGNC:27388]                                   | 107 | -0.84 | 0.1938 | -4.3 | 1.6E-05 | 5.4E-05 |
| ENSG00000171502 | COL24A1         | collagen type XXIV alpha 1 chain [Source:HGNC Symbol;Acc:HGNC:20821]                   | 11  | -3.24 | 0.7506 | -4.3 | 1.6E-05 | 5.4E-05 |
| ENSG00000163273 | NPPC            | natriuretic peptide C [Source:HGNC Symbol;Acc:HGNC:7941]                               | 46  | -1.24 | 0.2870 | -4.3 | 1.6E-05 | 5.5E-05 |
| ENSG00000166183 | ASPG            | asparaginase [Source:HGNC Symbol;Acc:HGNC:20123]                                       | 45  | -1.22 | 0.2826 | -4.3 | 1.6E-05 | 5.5E-05 |
| ENSG00000277147 | LINC00869       | long intergenic non-protein coding RNA 869 [Source:HGNC Symbol;Acc:HGNC:29050]         | 34  | -1.41 | 0.3276 | -4.3 | 1.7E-05 | 5.6E-05 |
| ENSG00000067048 | DDX3Y           | DEAD-box helicase 3 Y-linked [Source:HGNC Symbol;Acc:HGNC:2699]                        | 19  | -2.04 | 0.4751 | -4.3 | 1.7E-05 | 5.7E-05 |
| ENSG00000262117 | BCAR4           | breast cancer anti-estrogen resistance 4 [Source:HGNC Symbol;Acc:HGNC:22170]           | 14  | -2.45 | 0.5703 | -4.3 | 1.7E-05 | 5.8E-05 |
| ENSG00000166448 | TMEM130         | transmembrane protein 130 [Source:HGNC Symbol;Acc:HGNC:25429]                          | 27  | -1.64 | 0.3814 | -4.3 | 1.7E-05 | 5.9E-05 |
| ENSG00000204472 | AIF1            | allograft inflammatory factor 1 [Source:HGNC Symbol;Acc:HGNC:352]                      | 22  | -1.82 | 0.4242 | -4.3 | 1.7E-05 | 5.9E-05 |
| ENSG00000138080 | EMILIN1         | elastin microfibril interfacier 1 [Source:HGNC Symbol;Acc:HGNC:19880]                  | 62  | -1.02 | 0.2370 | -4.3 | 1.8E-05 | 6.0E-05 |
| ENSG00000185436 | IFNLR1          | interferon lambda receptor 1 [Source:HGNC Symbol;Acc:HGNC:18584]                       | 201 | -0.59 | 0.1368 | -4.3 | 1.8E-05 | 6.0E-05 |
| ENSG00000148516 | ZEB1            | zinc finger E-box binding homeobox 1 [Source:HGNC Symbol;Acc:HGNC:11642]               | 33  | -1.48 | 0.3451 | -4.3 | 1.8E-05 | 6.1E-05 |
| ENSG00000110077 | MS4A6A          | membrane spanning 4-domains A6A [Source:HGNC Symbol;Acc:HGNC:13375]                    | 11  | -3.45 | 0.8068 | -4.3 | 1.8E-05 | 6.2E-05 |
| ENSG00000120215 | MLANA           | melan-A [Source:HGNC Symbol;Acc:HGNC:7124]                                             | 49  | -1.28 | 0.2996 | -4.3 | 1.9E-05 | 6.4E-05 |
| ENSG00000171368 | TPPP            | tubulin polymerization promoting protein [Source:HGNC Symbol;Acc:HGNC:24164]           | 109 | -0.78 | 0.1828 | -4.3 | 1.9E-05 | 6.4E-05 |
| ENSG00000077498 | TYR             | tyrosinase [Source:HGNC Symbol;Acc:HGNC:12442]                                         | 28  | -1.75 | 0.4100 | -4.3 | 1.9E-05 | 6.5E-05 |
| ENSG00000164047 | CAMP            | cathelicidin antimicrobial peptide [Source:HGNC Symbol;Acc:HGNC:1472]                  | 24  | -1.70 | 0.3978 | -4.3 | 1.9E-05 | 6.5E-05 |
| ENSG00000267279 | ENSG00000267279 | novel transcript                                                                       | 78  | -0.96 | 0.2241 | -4.3 | 1.9E-05 | 6.6E-05 |
| ENSG00000124920 | MYRF            | myelin regulatory factor [Source:HGNC Symbol;Acc:HGNC:1181]                            | 34  | -1.41 | 0.3294 | -4.3 | 2.0E-05 | 6.6E-05 |
| ENSG00000166340 | TPP1            | tripeptidyl peptidase 1 [Source:HGNC Symbol;Acc:HGNC:2073]                             | 213 | -0.55 | 0.1281 | -4.3 | 2.0E-05 | 6.8E-05 |
| ENSG00000173611 | SCAI            | suppressor of cancer cell invasion [Source:HGNC Symbol;Acc:HGNC:26709]                 | 141 | -0.67 | 0.1576 | -4.3 | 2.0E-05 | 6.8E-05 |
| ENSG00000095303 | PTGS1           | prostaglandin-endoperoxide synthase 1 [Source:HGNC Symbol;Acc:HGNC:9604]               | 24  | -1.79 | 0.4212 | -4.3 | 2.1E-05 | 6.9E-05 |
| ENSG00000108700 | CCL8            | C-C motif chemokine ligand 8 [Source:HGNC Symbol;Acc:HGNC:10635]                       | 17  | -2.62 | 0.6146 | -4.3 | 2.1E-05 | 6.9E-05 |
| ENSG00000173578 | XCR1            | X-C motif chemokine receptor 1 [Source:HGNC Symbol;Acc:HGNC:1625]                      | 5   | -5.83 | 1.3724 | -4.2 | 2.1E-05 | 7.2E-05 |
| ENSG00000146757 | ZNF92           | zinc finger protein 92 [Source:HGNC Symbol;Acc:HGNC:13168]                             | 157 | -0.65 | 0.1523 | -4.2 | 2.1E-05 | 7.2E-05 |
| ENSG00000058404 | CAMK2B          | calcium/calmodulin dependent protein kinase II beta [Source:HGNC Symbol;Acc:HGNC:1461] | 31  | -1.55 | 0.3647 | -4.2 | 2.2E-05 | 7.2E-05 |
| ENSG00000236333 | TRHDE-AS1       | TRHDE antisense RNA 1 [Source:HGNC Symbol;Acc:HGNC:27471]                              | 5   | -5.75 | 1.3571 | -4.2 | 2.3E-05 | 7.6E-05 |
| ENSG00000183486 | MX2             | MX dynamin like GTPase 2 [Source:HGNC Symbol;Acc:HGNC:7533]                            | 59  | -1.20 | 0.2826 | -4.2 | 2.3E-05 | 7.6E-05 |
| ENSG00000225950 | NTF4            | neurotrophin 4 [Source:HGNC Symbol;Acc:HGNC:8024]                                      | 149 | -0.68 | 0.1601 | -4.2 | 2.3E-05 | 7.6E-05 |
| ENSG00000162630 | B3GALT2         | beta-1,3-galactosyltransferase 2 [Source:HGNC Symbol;Acc:HGNC:917]                     | 10  | -3.73 | 0.8808 | -4.2 | 2.3E-05 | 7.6E-05 |
| ENSG00000259663 | ENSG00000259663 | novel transcript, antisense to ISL1                                                    | 10  | -3.71 | 0.8778 | -4.2 | 2.3E-05 | 7.8E-05 |
| ENSG00000287354 | ENSG00000287354 | novel transcript, antisense to HHAT                                                    | 10  | -4.83 | 1.1416 | -4.2 | 2.3E-05 | 7.8E-05 |
| ENSG00000163219 | ARHGAP25        | Rho GTPase activating protein 25 [Source:HGNC Symbol;Acc:HGNC:28951]                   | 19  | -1.95 | 0.4607 | -4.2 | 2.4E-05 | 7.8E-05 |
| ENSG00000236901 | MIR600HG        | MIR600 host gene [Source:HGNC Symbol;Acc:HGNC:23642]                                   | 76  | -0.94 | 0.2216 | -4.2 | 2.4E-05 | 7.9E-05 |
| ENSG00000269313 | MAGIX           | MAGI family member, X-linked [Source:HGNC Symbol;Acc:HGNC:30006]                       | 141 | -0.67 | 0.1578 | -4.2 | 2.4E-05 | 7.9E-05 |
| ENSG00000103449 | SALL1           | spalt like transcription factor 1 [Source:HGNC Symbol;Acc:HGNC:10524]                  | 18  | -2.06 | 0.4884 | -4.2 | 2.4E-05 | 8.0E-05 |
| ENSG00000143951 | WDPCP           | WD repeat containing planar cell polarity effector [Source:HGNC Symbol;Acc:HGNC:28027] | 205 | -0.58 | 0.1369 | -4.2 | 2.5E-05 | 8.2E-05 |
| ENSG00000141642 | ELAC1           | elaC ribonuclease Z 1 [Source:HGNC Symbol;Acc:HGNC:14197]                              | 66  | -0.99 | 0.2344 | -4.2 | 2.5E-05 | 8.2E-05 |
| ENSG00000247317 | LY6E-DT         | LY6E divergent transcript [Source:HGNC Symbol;Acc:HGNC:53728]                          | 10  | -4.76 | 1.1281 | -4.2 | 2.5E-05 | 8.2E-05 |
| ENSG00000205890 | ENSG00000205890 | novel transcript, antisense to CCDC64B                                                 | 29  | -1.53 | 0.3619 | -4.2 | 2.5E-05 | 8.3E-05 |

|                 |            |                                                                                                          |  |     |       |        |      |         |         |
|-----------------|------------|----------------------------------------------------------------------------------------------------------|--|-----|-------|--------|------|---------|---------|
| ENSG00000287364 | ENSG000002 | novel transcript                                                                                         |  | 5   | -5.74 | 1.3628 | -4.2 | 2.5E-05 | 8.3E-05 |
| ENSG00000280916 | FOXCUT     | FOXC1 upstream transcript [Source:HGNC Symbol;Acc:HGNC:50650]                                            |  | 10  | -3.22 | 0.7636 | -4.2 | 2.5E-05 | 8.4E-05 |
| ENSG00000101204 | CHRNA4     | cholinergic receptor nicotinic alpha 4 subunit [Source:HGNC Symbol;Acc:HGNC:1958]                        |  | 19  | -1.98 | 0.4694 | -4.2 | 2.5E-05 | 8.4E-05 |
| ENSG00000227674 | LINC00355  | long intergenic non-protein coding RNA 355 [Source:HGNC Symbol;Acc:HGNC:27061]                           |  | 23  | -1.79 | 0.4246 | -4.2 | 2.5E-05 | 8.4E-05 |
| ENSG00000160791 | CCR5       | C-C motif chemokine receptor 5 [Source:HGNC Symbol;Acc:HGNC:1606]                                        |  | 14  | -2.50 | 0.5938 | -4.2 | 2.5E-05 | 8.4E-05 |
| ENSG00000182919 | C11orf54   | chromosome 11 open reading frame 54 [Source:HGNC Symbol;Acc:HGNC:30204]                                  |  | 98  | -0.86 | 0.2051 | -4.2 | 2.6E-05 | 8.5E-05 |
| ENSG00000184669 | OR7E14P    | olfactory receptor family 7 subfamily E member 14 pseudogene [Source:HGNC Symbol;Acc:HGNC:8385]          |  | 5   | -5.73 | 1.3623 | -4.2 | 2.6E-05 | 8.6E-05 |
| ENSG00000225177 | ENSG000002 | novel transcript                                                                                         |  | 84  | -0.85 | 0.2014 | -4.2 | 2.6E-05 | 8.6E-05 |
| ENSG00000079931 | MOXD1      | monooxygenase DBH like 1 [Source:HGNC Symbol;Acc:HGNC:21063]                                             |  | 14  | -2.54 | 0.6041 | -4.2 | 2.6E-05 | 8.7E-05 |
| ENSG00000286596 | ENSG000002 | novel transcript, antisense to PCDH7                                                                     |  | 16  | -2.19 | 0.5198 | -4.2 | 2.6E-05 | 8.7E-05 |
| ENSG00000188211 | NCR3LG1    | natural killer cell cytotoxicity receptor 3 ligand 1 [Source:HGNC Symbol;Acc:HGNC:42400]                 |  | 169 | -0.66 | 0.1576 | -4.2 | 2.7E-05 | 8.8E-05 |
| ENSG00000123689 | G0S2       | G0/G1 switch 2 [Source:HGNC Symbol;Acc:HGNC:30229]                                                       |  | 53  | -1.10 | 0.2607 | -4.2 | 2.7E-05 | 8.8E-05 |
| ENSG00000267575 | ENSG000002 | novel transcript                                                                                         |  | 238 | -0.51 | 0.1217 | -4.2 | 2.7E-05 | 9.0E-05 |
| ENSG00000166105 | GLB1L3     | galactosidase beta 1 like 3 [Source:HGNC Symbol;Acc:HGNC:25147]                                          |  | 238 | -0.52 | 0.1244 | -4.2 | 2.8E-05 | 9.2E-05 |
| ENSG00000171885 | AQP4       | aquaporin 4 [Source:HGNC Symbol;Acc:HGNC:637]                                                            |  | 12  | -2.74 | 0.6545 | -4.2 | 2.8E-05 | 9.3E-05 |
| ENSG00000235169 | SMIM1      | small integral membrane protein 1 (Vel blood group) [Source:HGNC Symbol;Acc:HGNC:44204]                  |  | 27  | -1.62 | 0.3887 | -4.2 | 2.9E-05 | 9.7E-05 |
| ENSG00000204335 | SP5        | Sp5 transcription factor [Source:HGNC Symbol;Acc:HGNC:14529]                                             |  | 41  | -2.42 | 0.5806 | -4.2 | 3.1E-05 | 1.0E-04 |
| ENSG00000148655 | LRMDA      | leucine rich melanocyte differentiation associated [Source:HGNC Symbol;Acc:HGNC:23405]                   |  | 12  | -2.74 | 0.6577 | -4.2 | 3.2E-05 | 1.0E-04 |
| ENSG00000170345 | FOS        | Fos proto-oncogene, AP-1 transcription factor subunit [Source:HGNC Symbol;Acc:HGNC:3796]                 |  | 146 | -0.63 | 0.1522 | -4.2 | 3.2E-05 | 1.0E-04 |
| ENSG00000267472 | ARHGAP27P  | Rho GTPase activating protein 27 pseudogene 2 [Source:HGNC Symbol;Acc:HGNC:53771]                        |  | 5   | -5.68 | 1.3644 | -4.2 | 3.2E-05 | 1.1E-04 |
| ENSG00000150201 | FXVD4      | FXVD domain containing ion transport regulator 4 [Source:HGNC Symbol;Acc:HGNC:4028]                      |  | 8   | -5.42 | 1.3036 | -4.2 | 3.2E-05 | 1.1E-04 |
| NA              | 26         | NA                                                                                                       |  | 21  | -1.81 | 0.4366 | -4.2 | 3.3E-05 | 1.1E-04 |
| ENSG00000183891 | TTC32      | tetratricopeptide repeat domain 32 [Source:HGNC Symbol;Acc:HGNC:32954]                                   |  | 176 | -0.58 | 0.1388 | -4.2 | 3.3E-05 | 1.1E-04 |
| ENSG00000109339 | MAPK10     | mitogen-activated protein kinase 10 [Source:HGNC Symbol;Acc:HGNC:6872]                                   |  | 27  | -1.63 | 0.3937 | -4.1 | 3.3E-05 | 1.1E-04 |
| ENSG00000187391 | MAGI2      | membrane associated guanylate kinase, WW and PDZ domain containing 2 [Source:HGNC Symbol;Acc:HGNC:15460] |  | 37  | -1.36 | 0.3268 | -4.1 | 3.3E-05 | 1.1E-04 |
| ENSG00000164066 | INTU       | inturned planar cell polarity protein [Source:HGNC Symbol;Acc:HGNC:29239]                                |  | 208 | -0.55 | 0.1330 | -4.1 | 3.4E-05 | 1.1E-04 |
| ENSG00000151778 | SERP2      | stress associated endoplasmic reticulum protein family member 2 [Source:HGNC Symbol;Acc:HGNC:20655]      |  | 42  | -1.20 | 0.2893 | -4.1 | 3.4E-05 | 1.1E-04 |
| ENSG00000131042 | LILRB2     | leukocyte immunoglobulin like receptor B2 [Source:HGNC Symbol;Acc:HGNC:6606]                             |  | 13  | -2.69 | 0.6492 | -4.1 | 3.5E-05 | 1.1E-04 |
| ENSG00000178162 | FAR2P2     | fatty acyl-CoA reductase 2 pseudogene 2 [Source:HGNC Symbol;Acc:HGNC:49279]                              |  | 31  | -1.43 | 0.3453 | -4.1 | 3.5E-05 | 1.1E-04 |
| ENSG00000127863 | TNFRSF19   | TNF receptor superfamily member 19 [Source:HGNC Symbol;Acc:HGNC:11915]                                   |  | 14  | -2.29 | 0.5540 | -4.1 | 3.5E-05 | 1.1E-04 |
| ENSG00000157445 | CACNA2D3   | calcium voltage-gated channel auxiliary subunit alpha2delta 3 [Source:HGNC Symbol;Acc:HGNC:15460]        |  | 10  | -3.63 | 0.8774 | -4.1 | 3.5E-05 | 1.1E-04 |
| ENSG00000267272 | LINC01140  | long intergenic non-protein coding RNA 1140 [Source:HGNC Symbol;Acc:HGNC:27922]                          |  | 12  | -2.87 | 0.6941 | -4.1 | 3.5E-05 | 1.2E-04 |
| ENSG00000143507 | DUSP10     | dual specificity phosphatase 10 [Source:HGNC Symbol;Acc:HGNC:3065]                                       |  | 202 | -0.54 | 0.1319 | -4.1 | 3.6E-05 | 1.2E-04 |
| ENSG00000140678 | ITGAX      | integrin subunit alpha X [Source:HGNC Symbol;Acc:HGNC:6152]                                              |  | 21  | -1.80 | 0.4349 | -4.1 | 3.6E-05 | 1.2E-04 |
| ENSG00000173372 | C1QA       | complement C1q A chain [Source:HGNC Symbol;Acc:HGNC:1241]                                                |  | 52  | -2.16 | 0.5241 | -4.1 | 3.7E-05 | 1.2E-04 |
| ENSG00000162998 | FRZB       | frizzled related protein [Source:HGNC Symbol;Acc:HGNC:3959]                                              |  | 10  | -3.46 | 0.8397 | -4.1 | 3.8E-05 | 1.2E-04 |
| ENSG00000128573 | FOXP2      | forkhead box P2 [Source:HGNC Symbol;Acc:HGNC:13875]                                                      |  | 8   | -5.34 | 1.2996 | -4.1 | 4.0E-05 | 1.3E-04 |
| ENSG00000141837 | CACNA1A    | calcium voltage-gated channel subunit alpha1 A [Source:HGNC Symbol;Acc:HGNC:1388]                        |  | 20  | -1.88 | 0.4568 | -4.1 | 4.0E-05 | 1.3E-04 |
| ENSG00000116833 | NR5A2      | nuclear receptor subfamily 5 group A member 2 [Source:HGNC Symbol;Acc:HGNC:7984]                         |  | 116 | -0.71 | 0.1741 | -4.1 | 4.1E-05 | 1.3E-04 |
| ENSG00000173846 | PLK3       | polo like kinase 3 [Source:HGNC Symbol;Acc:HGNC:2154]                                                    |  | 68  | -0.95 | 0.2310 | -4.1 | 4.1E-05 | 1.3E-04 |
| ENSG00000123191 | ATP7B      | ATPase copper transporting beta [Source:HGNC Symbol;Acc:HGNC:870]                                        |  | 121 | -0.69 | 0.1677 | -4.1 | 4.1E-05 | 1.3E-04 |
| ENSG00000144730 | IL17RD     | interleukin 17 receptor D [Source:HGNC Symbol;Acc:HGNC:17616]                                            |  | 105 | -0.75 | 0.1832 | -4.1 | 4.1E-05 | 1.3E-04 |

|                 |            |                                                                                           |     |       |        |      |         |         |
|-----------------|------------|-------------------------------------------------------------------------------------------|-----|-------|--------|------|---------|---------|
| ENSG00000283709 | FAM238C    | family with sequence similarity 238 member C [Source:HGNC Symbol;Acc:HGNC:24672]          | 9   | -4.69 | 1.1440 | -4.1 | 4.2E-05 | 1.4E-04 |
| ENSG00000234742 | ENSG000002 | ribosomal protein L17 (RPL17) pseudogene                                                  | 191 | -0.60 | 0.1459 | -4.1 | 4.2E-05 | 1.4E-04 |
| ENSG00000168350 | DEGS2      | delta 4-desaturase, sphingolipid 2 [Source:HGNC Symbol;Acc:HGNC:20113]                    | 25  | -1.60 | 0.3916 | -4.1 | 4.2E-05 | 1.4E-04 |
| ENSG00000225828 | FAM229A    | family with sequence similarity 229 member A [Source:HGNC Symbol;Acc:HGNC:44652]          | 82  | -0.86 | 0.2100 | -4.1 | 4.2E-05 | 1.4E-04 |
| ENSG00000172197 | MBOAT1     | membrane bound O-acyltransferase domain containing 1 [Source:HGNC Symbol;Acc:HGNC:21579]  | 63  | -0.95 | 0.2333 | -4.1 | 4.3E-05 | 1.4E-04 |
| ENSG00000170423 | KRT78      | keratin 78 [Source:HGNC Symbol;Acc:HGNC:28926]                                            | 5   | -5.62 | 1.3741 | -4.1 | 4.3E-05 | 1.4E-04 |
| ENSG00000170290 | SLN        | sarcolipin [Source:HGNC Symbol;Acc:HGNC:11089]                                            | 15  | -2.32 | 0.5676 | -4.1 | 4.3E-05 | 1.4E-04 |
| ENSG00000168928 | CTRB2      | chymotrypsinogen B2 [Source:HGNC Symbol;Acc:HGNC:2522]                                    | 5   | -5.65 | 1.3821 | -4.1 | 4.3E-05 | 1.4E-04 |
| ENSG00000164049 | FBXW12     | F-box and WD repeat domain containing 12 [Source:HGNC Symbol;Acc:HGNC:20729]              | 10  | -3.35 | 0.8186 | -4.1 | 4.4E-05 | 1.4E-04 |
| ENSG00000229021 | ENSG000002 | novel transcript                                                                          | 30  | -1.44 | 0.3536 | -4.1 | 4.4E-05 | 1.4E-04 |
| ENSG00000186369 | LINC00643  | long intergenic non-protein coding RNA 643 [Source:HGNC Symbol;Acc:HGNC:44296]            | 21  | -1.81 | 0.4440 | -4.1 | 4.4E-05 | 1.4E-04 |
| ENSG00000171094 | ALK        | ALK receptor tyrosine kinase [Source:HGNC Symbol;Acc:HGNC:427]                            | 15  | -2.21 | 0.5415 | -4.1 | 4.5E-05 | 1.5E-04 |
| ENSG00000164093 | PITX2      | paired like homeodomain 2 [Source:HGNC Symbol;Acc:HGNC:9005]                              | 27  | -1.50 | 0.3674 | -4.1 | 4.5E-05 | 1.5E-04 |
| ENSG00000245526 | LINC00461  | long intergenic non-protein coding RNA 461 [Source:HGNC Symbol;Acc:HGNC:42810]            | 29  | -1.45 | 0.3556 | -4.1 | 4.6E-05 | 1.5E-04 |
| ENSG00000259994 | ENSG000002 | novel transcript, overlapping to MTPAP                                                    | 17  | -2.13 | 0.5223 | -4.1 | 4.6E-05 | 1.5E-04 |
| ENSG00000182040 | USH1G      | USH1 protein network component sans [Source:HGNC Symbol;Acc:HGNC:16356]                   | 45  | -1.19 | 0.2927 | -4.1 | 4.6E-05 | 1.5E-04 |
| ENSG00000285818 | ENSG000002 | novel nuclear pore associated protein 1 (NPAP1) pseudogene                                | 5   | -5.61 | 1.3771 | -4.1 | 4.6E-05 | 1.5E-04 |
| ENSG00000236924 | ENSG000002 | novel transcript                                                                          | 9   | -4.64 | 1.1418 | -4.1 | 4.8E-05 | 1.5E-04 |
| ENSG00000250874 | ENSG000002 | novel transcript                                                                          | 5   | -5.60 | 1.3758 | -4.1 | 4.8E-05 | 1.5E-04 |
| ENSG00000197405 | C5AR1      | complement C5a receptor 1 [Source:HGNC Symbol;Acc:HGNC:1338]                              | 43  | -1.18 | 0.2912 | -4.1 | 4.8E-05 | 1.6E-04 |
| ENSG00000216937 | CCDC7      | coiled-coil domain containing 7 [Source:HGNC Symbol;Acc:HGNC:26533]                       | 32  | -1.41 | 0.3479 | -4.1 | 4.8E-05 | 1.6E-04 |
| ENSG00000162881 | OXER1      | oxoeicosanoid receptor 1 [Source:HGNC Symbol;Acc:HGNC:24884]                              | 11  | -2.68 | 0.6612 | -4.1 | 4.9E-05 | 1.6E-04 |
| ENSG00000003987 | MTMR7      | myotubularin related protein 7 [Source:HGNC Symbol;Acc:HGNC:7454]                         | 10  | -3.31 | 0.8166 | -4.1 | 5.0E-05 | 1.6E-04 |
| ENSG00000176907 | TCIM       | transcriptional and immune response regulator [Source:HGNC Symbol;Acc:HGNC:1357]          | 18  | -1.95 | 0.4795 | -4.1 | 5.0E-05 | 1.6E-04 |
| ENSG00000132972 | RNF17      | ring finger protein 17 [Source:HGNC Symbol;Acc:HGNC:10060]                                | 5   | -5.59 | 1.3771 | -4.1 | 5.0E-05 | 1.6E-04 |
| ENSG00000212664 | ENSG000002 | ribosomal protein L17 (RPL17) pseudogene                                                  | 209 | -0.52 | 0.1287 | -4.1 | 5.0E-05 | 1.6E-04 |
| ENSG00000171951 | SCG2       | secretogranin II [Source:HGNC Symbol;Acc:HGNC:10575]                                      | 57  | -1.08 | 0.2675 | -4.1 | 5.0E-05 | 1.6E-04 |
| ENSG00000082556 | OPRK1      | opioid receptor kappa 1 [Source:HGNC Symbol;Acc:HGNC:8154]                                | 56  | -1.01 | 0.2483 | -4.1 | 5.1E-05 | 1.6E-04 |
| ENSG00000197849 | OR8G1      | olfactory receptor family 8 subfamily G member 1 [Source:HGNC Symbol;Acc:HGNC:8484]       | 7   | -5.28 | 1.3036 | -4.0 | 5.2E-05 | 1.7E-04 |
| ENSG00000176971 | FIBIN      | fin bud initiation factor homolog [Source:HGNC Symbol;Acc:HGNC:33747]                     | 16  | -2.12 | 0.5232 | -4.0 | 5.2E-05 | 1.7E-04 |
| ENSG00000144406 | UNC80      | unc-80 homolog, NALCN channel complex subunit [Source:HGNC Symbol;Acc:HGNC:26582]         | 14  | -2.29 | 0.5676 | -4.0 | 5.3E-05 | 1.7E-04 |
| ENSG00000116147 | TNR        | tenascin R [Source:HGNC Symbol;Acc:HGNC:11953]                                            | 9   | -3.32 | 0.8214 | -4.0 | 5.3E-05 | 1.7E-04 |
| ENSG00000242808 | SOX2-OT    | SOX2 overlapping transcript [Source:HGNC Symbol;Acc:HGNC:20209]                           | 13  | -2.48 | 0.6140 | -4.0 | 5.4E-05 | 1.7E-04 |
| ENSG00000077522 | ACTN2      | actinin alpha 2 [Source:HGNC Symbol;Acc:HGNC:164]                                         | 28  | -1.45 | 0.3597 | -4.0 | 5.4E-05 | 1.7E-04 |
| ENSG00000232229 | LINC00865  | long intergenic non-protein coding RNA 865 [Source:HGNC Symbol;Acc:HGNC:45170]            | 13  | -2.37 | 0.5874 | -4.0 | 5.5E-05 | 1.8E-04 |
| ENSG00000170899 | GSTA4      | glutathione S-transferase alpha 4 [Source:HGNC Symbol;Acc:HGNC:4629]                      | 23  | -1.74 | 0.4306 | -4.0 | 5.5E-05 | 1.8E-04 |
| ENSG00000153563 | CD8A       | CD8a molecule [Source:HGNC Symbol;Acc:HGNC:1706]                                          | 20  | -1.84 | 0.4559 | -4.0 | 5.6E-05 | 1.8E-04 |
| ENSG00000231389 | HLA-DPA1   | major histocompatibility complex, class II, DP alpha 1 [Source:HGNC Symbol;Acc:HGNC:4938] | 43  | -1.17 | 0.2911 | -4.0 | 5.6E-05 | 1.8E-04 |
| ENSG00000262370 | ENSG000002 | novel transcript                                                                          | 4   | -5.56 | 1.3804 | -4.0 | 5.6E-05 | 1.8E-04 |
| ENSG00000112812 | PRSS16     | serine protease 16 [Source:HGNC Symbol;Acc:HGNC:9480]                                     | 124 | -0.69 | 0.1725 | -4.0 | 5.7E-05 | 1.8E-04 |
| ENSG00000274825 | ENSG000002 | novel transcript                                                                          | 20  | -1.94 | 0.4812 | -4.0 | 5.8E-05 | 1.8E-04 |
| ENSG00000100968 | NFATC4     | nuclear factor of activated T cells 4 [Source:HGNC Symbol;Acc:HGNC:7778]                  | 12  | -2.87 | 0.7129 | -4.0 | 5.8E-05 | 1.9E-04 |

|                 |            |                                                                                          |     |       |        |      |         |         |
|-----------------|------------|------------------------------------------------------------------------------------------|-----|-------|--------|------|---------|---------|
| ENSG00000187951 | ENSG000002 | novel transcript                                                                         | 87  | -0.90 | 0.2229 | -4.0 | 5.8E-05 | 1.9E-04 |
| ENSG00000171551 | ECEL1      | endothelin converting enzyme like 1 [Source:HGNC Symbol;Acc:HGNC:3147]                   | 13  | -2.40 | 0.5980 | -4.0 | 5.9E-05 | 1.9E-04 |
| ENSG00000164488 | DACT2      | dishevelled binding antagonist of beta catenin 2 [Source:HGNC Symbol;Acc:HGNC:21231]     | 7   | -5.26 | 1.3097 | -4.0 | 5.9E-05 | 1.9E-04 |
| ENSG00000279419 | ENSG000002 | tec                                                                                      | 9   | -4.66 | 1.1612 | -4.0 | 5.9E-05 | 1.9E-04 |
| ENSG00000122574 | WIPF3      | WAS/WASL interacting protein family member 3 [Source:HGNC Symbol;Acc:HGNC:22004]         | 18  | -2.04 | 0.5077 | -4.0 | 6.0E-05 | 1.9E-04 |
| ENSG00000277586 | NEFL       | neurofilament light [Source:HGNC Symbol;Acc:HGNC:7739]                                   | 13  | -2.35 | 0.5846 | -4.0 | 6.0E-05 | 1.9E-04 |
| ENSG00000150048 | CLEC1A     | C-type lectin domain family 1 member A [Source:HGNC Symbol;Acc:HGNC:24355]               | 9   | -3.60 | 0.9006 | -4.0 | 6.5E-05 | 2.1E-04 |
| ENSG00000235295 | LINC01634  | long intergenic non-protein coding RNA 1634 [Source:HGNC Symbol;Acc:HGNC:52421]          | 26  | -1.54 | 0.3844 | -4.0 | 6.5E-05 | 2.1E-04 |
| ENSG00000169507 | SLC38A11   | solute carrier family 38 member 11 [Source:HGNC Symbol;Acc:HGNC:26836]                   | 7   | -5.23 | 1.3099 | -4.0 | 6.5E-05 | 2.1E-04 |
| ENSG00000137573 | SULF1      | sulfatase 1 [Source:HGNC Symbol;Acc:HGNC:20391]                                          | 11  | -2.65 | 0.6645 | -4.0 | 6.5E-05 | 2.1E-04 |
| ENSG00000157833 | GAREM2     | GRB2 associated regulator of MAPK1 subtype 2 [Source:HGNC Symbol;Acc:HGNC:27172]         | 156 | -0.59 | 0.1470 | -4.0 | 6.6E-05 | 2.1E-04 |
| ENSG00000272914 | ENSG000002 | novel transcript, sense intronic to ZNF438                                               | 7   | -5.24 | 1.3122 | -4.0 | 6.6E-05 | 2.1E-04 |
| ENSG00000269973 | ENSG000002 | novel transcript                                                                         | 34  | -1.31 | 0.3282 | -4.0 | 6.6E-05 | 2.1E-04 |
| ENSG00000075673 | ATP12A     | ATPase H+/K+ transporting non-gastric alpha2 subunit [Source:HGNC Symbol;Acc:HGNC:13816] | 9   | -4.59 | 1.1518 | -4.0 | 6.7E-05 | 2.1E-04 |
| ENSG00000287963 | ENSG000002 | novel transcript                                                                         | 117 | -0.73 | 0.1838 | -4.0 | 6.8E-05 | 2.1E-04 |
| ENSG00000113263 | ITK        | IL2 inducible T cell kinase [Source:HGNC Symbol;Acc:HGNC:6171]                           | 9   | -3.58 | 0.8985 | -4.0 | 6.8E-05 | 2.1E-04 |
| ENSG00000114737 | CISH       | cytokine inducible SH2 containing protein [Source:HGNC Symbol;Acc:HGNC:1984]             | 49  | -1.05 | 0.2633 | -4.0 | 6.9E-05 | 2.2E-04 |
| ENSG00000161281 | COX7A1     | cytochrome c oxidase subunit 7A1 [Source:HGNC Symbol;Acc:HGNC:2287]                      | 13  | -2.36 | 0.5926 | -4.0 | 7.0E-05 | 2.2E-04 |
| ENSG00000122971 | ACADS      | acyl-CoA dehydrogenase short chain [Source:HGNC Symbol;Acc:HGNC:90]                      | 185 | -0.54 | 0.1358 | -4.0 | 7.1E-05 | 2.3E-04 |
| ENSG00000198483 | ANKRD35    | ankyrin repeat domain 35 [Source:HGNC Symbol;Acc:HGNC:26323]                             | 7   | -5.29 | 1.3322 | -4.0 | 7.1E-05 | 2.3E-04 |
| ENSG00000174482 | LINGO2     | leucine rich repeat and Ig domain containing 2 [Source:HGNC Symbol;Acc:HGNC:21207]       | 4   | -5.52 | 1.3900 | -4.0 | 7.1E-05 | 2.3E-04 |
| ENSG00000108759 | KRT32      | keratin 32 [Source:HGNC Symbol;Acc:HGNC:6449]                                            | 30  | -1.39 | 0.3510 | -4.0 | 7.2E-05 | 2.3E-04 |
| ENSG00000152931 | PART1      | prostate androgen-regulated transcript 1 [Source:HGNC Symbol;Acc:HGNC:17263]             | 8   | -3.94 | 0.9937 | -4.0 | 7.3E-05 | 2.3E-04 |
| ENSG00000197915 | HRNR       | hornerin [Source:HGNC Symbol;Acc:HGNC:20846]                                             | 13  | -2.81 | 0.7095 | -4.0 | 7.3E-05 | 2.3E-04 |
| ENSG00000212237 | RNA5SP18   | RNA, 5S ribosomal pseudogene 18 [Source:HGNC Symbol;Acc:HGNC:42586]                      | 12  | -2.53 | 0.6380 | -4.0 | 7.3E-05 | 2.3E-04 |
| ENSG00000147443 | DOK2       | docking protein 2 [Source:HGNC Symbol;Acc:HGNC:2991]                                     | 10  | -2.89 | 0.7296 | -4.0 | 7.3E-05 | 2.3E-04 |
| ENSG00000165566 | AMER2      | APC membrane recruitment protein 2 [Source:HGNC Symbol;Acc:HGNC:26360]                   | 8   | -3.90 | 0.9822 | -4.0 | 7.3E-05 | 2.3E-04 |
| ENSG00000187068 | C3orf70    | chromosome 3 open reading frame 70 [Source:HGNC Symbol;Acc:HGNC:33731]                   | 9   | -3.56 | 0.8967 | -4.0 | 7.3E-05 | 2.3E-04 |
| ENSG00000187553 | CYP26C1    | cytochrome P450 family 26 subfamily C member 1 [Source:HGNC Symbol;Acc:HGNC:20577]       | 11  | -2.75 | 0.6948 | -4.0 | 7.4E-05 | 2.3E-04 |
| ENSG00000249279 | LINC02057  | long intergenic non-protein coding RNA 2057 [Source:HGNC Symbol;Acc:HGNC:52900]          | 45  | -1.10 | 0.2786 | -4.0 | 7.4E-05 | 2.4E-04 |
| ENSG00000237732 | CT75       | cancer/testis associated transcript 75 [Source:HGNC Symbol;Acc:HGNC:37174]               | 19  | -1.84 | 0.4656 | -4.0 | 7.7E-05 | 2.4E-04 |
| ENSG00000169220 | RGS14      | regulator of G protein signaling 14 [Source:HGNC Symbol;Acc:HGNC:9996]                   | 121 | -0.79 | 0.2005 | -4.0 | 7.7E-05 | 2.4E-04 |
| ENSG00000241735 | FABP5P3    | fatty acid binding protein 5 pseudogene 3 [Source:HGNC Symbol;Acc:HGNC:22573]            | 20  | -1.74 | 0.4401 | -4.0 | 7.7E-05 | 2.4E-04 |
| ENSG00000127152 | BCL11B     | BAF chromatin remodeling complex subunit BCL11B [Source:HGNC Symbol;Acc:HGNC:13222]      | 12  | -2.52 | 0.6379 | -3.9 | 7.8E-05 | 2.5E-04 |
| ENSG00000180828 | BHLHE22    | basic helix-loop-helix family member e22 [Source:HGNC Symbol;Acc:HGNC:11963]             | 8   | -3.92 | 0.9933 | -3.9 | 7.8E-05 | 2.5E-04 |
| ENSG00000102802 | MEDAG      | mesenteric estrogen dependent adipogenesis [Source:HGNC Symbol;Acc:HGNC:25926]           | 15  | -2.14 | 0.5410 | -3.9 | 7.9E-05 | 2.5E-04 |
| ENSG00000140379 | BCL2A1     | BCL2 related protein A1 [Source:HGNC Symbol;Acc:HGNC:991]                                | 17  | -1.94 | 0.4914 | -3.9 | 8.0E-05 | 2.5E-04 |
| ENSG00000152270 | PDE3B      | phosphodiesterase 3B [Source:HGNC Symbol;Acc:HGNC:8779]                                  | 14  | -2.20 | 0.5582 | -3.9 | 8.0E-05 | 2.5E-04 |
| ENSG00000160961 | ZNF333     | zinc finger protein 333 [Source:HGNC Symbol;Acc:HGNC:15624]                              | 97  | -0.74 | 0.1880 | -3.9 | 8.1E-05 | 2.5E-04 |
| ENSG00000135373 | EHF        | ETS homologous factor [Source:HGNC Symbol;Acc:HGNC:3246]                                 | 15  | -2.08 | 0.5284 | -3.9 | 8.2E-05 | 2.6E-04 |
| ENSG00000133561 | GIMAP6     | GTPase, IMAP family member 6 [Source:HGNC Symbol;Acc:HGNC:21918]                         | 12  | -2.48 | 0.6307 | -3.9 | 8.3E-05 | 2.6E-04 |
| ENSG00000166450 | PRTG       | protogenin [Source:HGNC Symbol;Acc:HGNC:26373]                                           | 187 | -0.54 | 0.1376 | -3.9 | 8.3E-05 | 2.6E-04 |

|                 |                 |                                                                                                 |      |       |        |      |         |         |
|-----------------|-----------------|-------------------------------------------------------------------------------------------------|------|-------|--------|------|---------|---------|
| ENSG00000167768 | KRT1            | keratin 1 [Source:HGNC Symbol;Acc:HGNC:6412]                                                    | 4    | -5.53 | 1.4045 | -3.9 | 8.3E-05 | 2.6E-04 |
| ENSG00000146197 | SCUBE3          | signal peptide, CUB domain and EGF like domain containing 3 [Source:HGNC Symbol;Acc:HGNC:13655] | 169  | -0.55 | 0.1411 | -3.9 | 8.4E-05 | 2.6E-04 |
| ENSG00000169435 | RASSF6          | Ras association domain family member 6 [Source:HGNC Symbol;Acc:HGNC:20796]                      | 17   | -2.12 | 0.5393 | -3.9 | 8.4E-05 | 2.6E-04 |
| ENSG00000287575 | ENSG00000287575 | novel transcript                                                                                | 8    | -3.50 | 0.8903 | -3.9 | 8.5E-05 | 2.7E-04 |
| ENSG00000179855 | GIPC3           | GIPC PDZ domain containing family member 3 [Source:HGNC Symbol;Acc:HGNC:18183]                  | 42   | -1.18 | 0.3003 | -3.9 | 8.7E-05 | 2.7E-04 |
| ENSG00000183801 | OLFML1          | olfactomedin like 1 [Source:HGNC Symbol;Acc:HGNC:24473]                                         | 8    | -3.89 | 0.9920 | -3.9 | 8.7E-05 | 2.7E-04 |
| ENSG00000197181 | PIWIL2          | piwi like RNA-mediated gene silencing 2 [Source:HGNC Symbol;Acc:HGNC:17644]                     | 33   | -1.28 | 0.3265 | -3.9 | 8.7E-05 | 2.7E-04 |
| ENSG00000215883 | CYB5RL          | cytochrome b5 reductase like [Source:HGNC Symbol;Acc:HGNC:32220]                                | 65   | -0.89 | 0.2275 | -3.9 | 8.8E-05 | 2.8E-04 |
| ENSG00000279495 | ENSG00000279495 | novel transcript                                                                                | 82   | -0.80 | 0.2049 | -3.9 | 8.9E-05 | 2.8E-04 |
| ENSG00000136040 | PLXNC1          | plexin C1 [Source:HGNC Symbol;Acc:HGNC:9106]                                                    | 40   | -1.17 | 0.2986 | -3.9 | 8.9E-05 | 2.8E-04 |
| ENSG00000287356 | ENSG00000287356 | novel transcript, antisense to MORN1                                                            | 43   | -1.12 | 0.2850 | -3.9 | 8.9E-05 | 2.8E-04 |
| ENSG00000266970 | SOCS3-DT        | SOCS3 divergent transcript [Source:HGNC Symbol;Acc:HGNC:52799]                                  | 43   | -1.13 | 0.2875 | -3.9 | 8.9E-05 | 2.8E-04 |
| NA              | 15              | NA                                                                                              | 17   | -1.98 | 0.5052 | -3.9 | 9.0E-05 | 2.8E-04 |
| ENSG00000273328 | ENSG00000273328 | novel transcript                                                                                | 7    | -5.15 | 1.3155 | -3.9 | 9.0E-05 | 2.8E-04 |
| ENSG00000260917 | ENSG00000260917 | novel transcript, overlapping to VT1A                                                           | 72   | -0.88 | 0.2255 | -3.9 | 9.1E-05 | 2.8E-04 |
| ENSG00000224784 | S100A15A        | S100 calcium binding protein A15A (pseudogene) [Source:HGNC Symbol;Acc:HGNC:53871]              | 4    | -5.48 | 1.3995 | -3.9 | 9.1E-05 | 2.8E-04 |
| ENSG00000245651 | ENSG00000245651 | novel transcript                                                                                | 7    | -5.15 | 1.3167 | -3.9 | 9.2E-05 | 2.9E-04 |
| ENSG00000133983 | COX16           | cytochrome c oxidase assembly factor COX16 [Source:HGNC Symbol;Acc:HGNC:20213]                  | 27   | -1.53 | 0.3912 | -3.9 | 9.4E-05 | 2.9E-04 |
| ENSG00000143387 | CTSK            | cathepsin K [Source:HGNC Symbol;Acc:HGNC:2536]                                                  | 56   | -1.00 | 0.2576 | -3.9 | 9.6E-05 | 3.0E-04 |
| ENSG00000135407 | AVIL            | advillin [Source:HGNC Symbol;Acc:HGNC:14188]                                                    | 49   | -1.06 | 0.2712 | -3.9 | 9.6E-05 | 3.0E-04 |
| ENSG00000106686 | SPATA6L         | spermatogenesis associated 6 like [Source:HGNC Symbol;Acc:HGNC:25472]                           | 38   | -1.30 | 0.3340 | -3.9 | 9.8E-05 | 3.0E-04 |
| ENSG00000093072 | ADA2            | adenosine deaminase 2 [Source:HGNC Symbol;Acc:HGNC:1839]                                        | 10   | -2.88 | 0.7398 | -3.9 | 9.8E-05 | 3.1E-04 |
| ENSG00000237036 | ZEB1-AS1        | ZEB1 antisense RNA 1 [Source:HGNC Symbol;Acc:HGNC:42354]                                        | 35   | -1.26 | 0.3225 | -3.9 | 9.9E-05 | 3.1E-04 |
| ENSG00000158786 | PLA2G2F         | phospholipase A2 group IIF [Source:HGNC Symbol;Acc:HGNC:30040]                                  | 10   | -3.08 | 0.7900 | -3.9 | 9.9E-05 | 3.1E-04 |
| ENSG00000114013 | CD86            | CD86 molecule [Source:HGNC Symbol;Acc:HGNC:1705]                                                | 15   | -2.14 | 0.5500 | -3.9 | 1.0E-04 | 3.1E-04 |
| ENSG00000155858 | LSM11           | LSM11, U7 small nuclear RNA associated [Source:HGNC Symbol;Acc:HGNC:30860]                      | 181  | 0.53  | 0.1350 | 3.9  | 1.0E-04 | 3.1E-04 |
| ENSG00000120860 | WASHC3          | WASH complex subunit 3 [Source:HGNC Symbol;Acc:HGNC:24256]                                      | 187  | 0.53  | 0.1354 | 3.9  | 9.3E-05 | 2.9E-04 |
| ENSG00000154240 | CEP112          | centrosomal protein 112 [Source:HGNC Symbol;Acc:HGNC:28514]                                     | 51   | 1.08  | 0.2751 | 3.9  | 9.2E-05 | 2.9E-04 |
| ENSG00000173530 | TNFRSF10D       | TNF receptor superfamily member 10d [Source:HGNC Symbol;Acc:HGNC:11907]                         | 191  | 0.54  | 0.1375 | 3.9  | 9.1E-05 | 2.8E-04 |
| ENSG00000105750 | ZNF85           | zinc finger protein 85 [Source:HGNC Symbol;Acc:HGNC:13160]                                      | 61   | 0.92  | 0.2356 | 3.9  | 8.9E-05 | 2.8E-04 |
| ENSG00000011332 | DPF1            | double PHD fingers 1 [Source:HGNC Symbol;Acc:HGNC:20225]                                        | 194  | 0.53  | 0.1347 | 3.9  | 8.8E-05 | 2.7E-04 |
| ENSG00000184083 | FAM120C         | family with sequence similarity 120C [Source:HGNC Symbol;Acc:HGNC:16949]                        | 112  | 0.71  | 0.1815 | 3.9  | 8.7E-05 | 2.7E-04 |
| ENSG00000287626 | ENSG00000287626 | novel transcript, antisense to DTNBP1                                                           | 76   | 0.83  | 0.2103 | 3.9  | 8.6E-05 | 2.7E-04 |
| ENSG00000167562 | ZNF701          | zinc finger protein 701 [Source:HGNC Symbol;Acc:HGNC:25597]                                     | 170  | 0.60  | 0.1532 | 3.9  | 8.6E-05 | 2.7E-04 |
| ENSG00000140905 | GCSH            | glycine cleavage system protein H [Source:HGNC Symbol;Acc:HGNC:4208]                            | 56   | 0.98  | 0.2498 | 3.9  | 8.5E-05 | 2.7E-04 |
| ENSG00000233527 | ZNF529-AS1      | ZNF529 antisense RNA 1 [Source:HGNC Symbol;Acc:HGNC:51275]                                      | 89   | 0.78  | 0.1993 | 3.9  | 8.2E-05 | 2.6E-04 |
| ENSG00000283689 | ENSG00000283689 | novel transcript, antisense to IRX3                                                             | 56   | 0.98  | 0.2486 | 3.9  | 8.0E-05 | 2.5E-04 |
| ENSG00000175602 | CCDC85B         | coiled-coil domain containing 85B [Source:HGNC Symbol;Acc:HGNC:24926]                           | 2083 | 0.71  | 0.1811 | 3.9  | 7.9E-05 | 2.5E-04 |
| ENSG00000139194 | RBP5            | retinol binding protein 5 [Source:HGNC Symbol;Acc:HGNC:15847]                                   | 10   | 2.81  | 0.7111 | 3.9  | 7.9E-05 | 2.5E-04 |
| ENSG00000267858 | MZF1-AS1        | MZF1 antisense RNA 1 [Source:HGNC Symbol;Acc:HGNC:51271]                                        | 81   | 0.82  | 0.2069 | 4.0  | 7.8E-05 | 2.5E-04 |
| ENSG00000198721 | ECL2            | enoyl-CoA delta isomerase 2 [Source:HGNC Symbol;Acc:HGNC:14601]                                 | 181  | 0.55  | 0.1380 | 4.0  | 7.8E-05 | 2.4E-04 |
| ENSG00000120833 | SOCS2           | suppressor of cytokine signaling 2 [Source:HGNC Symbol;Acc:HGNC:19382]                          | 126  | 0.67  | 0.1687 | 4.0  | 7.6E-05 | 2.4E-04 |

|                 |            |                                                                                              |     |      |        |     |         |         |
|-----------------|------------|----------------------------------------------------------------------------------------------|-----|------|--------|-----|---------|---------|
| ENSG00000233221 | ENSG000002 | novel transcript, antisense to ARHGEF4                                                       | 22  | 1.69 | 0.4263 | 4.0 | 7.6E-05 | 2.4E-04 |
| ENSG00000181004 | BBS12      | Bardet-Biedl syndrome 12 [Source:HGNC Symbol;Acc:HGNC:26648]                                 | 115 | 0.71 | 0.1787 | 4.0 | 7.6E-05 | 2.4E-04 |
| ENSG00000140297 | GCNT3      | glucosaminyl (N-acetyl) transferase 3, mucin type [Source:HGNC Symbol;Acc:HGNC:4205]         | 20  | 1.74 | 0.4407 | 4.0 | 7.6E-05 | 2.4E-04 |
| ENSG00000100209 | HSCB       | HscB mitochondrial iron-sulfur cluster cochaperone [Source:HGNC Symbol;Acc:HGNC:28913]       | 115 | 0.69 | 0.1734 | 4.0 | 7.5E-05 | 2.4E-04 |
| ENSG00000161010 | MRNIP      | MRN complex interacting protein [Source:HGNC Symbol;Acc:HGNC:30817]                          | 117 | 0.69 | 0.1746 | 4.0 | 7.0E-05 | 2.2E-04 |
| ENSG00000227295 | ELL2P1     | elongation factor for RNA polymerase II 2 pseudogene 1 [Source:HGNC Symbol;Acc:HGNC:39343]   | 10  | 3.00 | 0.7531 | 4.0 | 7.0E-05 | 2.2E-04 |
| ENSG00000234743 | EIF5AP4    | eukaryotic translation initiation factor 5A pseudogene 4 [Source:HGNC Symbol;Acc:HGNC:31442] | 149 | 0.60 | 0.1498 | 4.0 | 6.7E-05 | 2.1E-04 |
| ENSG00000111671 | SPSB2      | splA/ryanodine receptor domain and SOCS box containing 2 [Source:HGNC Symbol;Acc:HGNC:29522] | 191 | 0.53 | 0.1327 | 4.0 | 6.7E-05 | 2.1E-04 |
| ENSG00000154678 | PDE1C      | phosphodiesterase 1C [Source:HGNC Symbol;Acc:HGNC:8776]                                      | 15  | 2.06 | 0.5156 | 4.0 | 6.5E-05 | 2.1E-04 |
| ENSG00000282164 | PEG13      | paternally expressed 13 [Source:HGNC Symbol;Acc:HGNC:19969]                                  | 69  | 0.89 | 0.2232 | 4.0 | 6.4E-05 | 2.0E-04 |
| ENSG00000165698 | SPACA9     | sperm acrosome associated 9 [Source:HGNC Symbol;Acc:HGNC:1367]                               | 167 | 0.58 | 0.1447 | 4.0 | 6.3E-05 | 2.0E-04 |
| ENSG00000204257 | HLA-DMA    | major histocompatibility complex, class II, DM alpha [Source:HGNC Symbol;Acc:HGNC:4934]      | 22  | 1.82 | 0.4555 | 4.0 | 6.3E-05 | 2.0E-04 |
| ENSG00000237594 | ENSG000002 | novel transcript, antisense to TIAM1                                                         | 42  | 1.15 | 0.2884 | 4.0 | 6.2E-05 | 2.0E-04 |
| ENSG00000118922 | KLF12      | Kruppel like factor 12 [Source:HGNC Symbol;Acc:HGNC:6346]                                    | 33  | 1.40 | 0.3487 | 4.0 | 6.2E-05 | 2.0E-04 |
| ENSG00000176692 | FOXC2      | forkhead box C2 [Source:HGNC Symbol;Acc:HGNC:3801]                                           | 8   | 4.03 | 1.0047 | 4.0 | 6.1E-05 | 2.0E-04 |
| ENSG00000219470 | ENSG000002 | 40S ribosomal protein S2 (RPS2) pseudogene                                                   | 65  | 0.97 | 0.2412 | 4.0 | 6.1E-05 | 1.9E-04 |
| ENSG00000157110 | RBPMS      | RNA binding protein, mRNA processing factor [Source:HGNC Symbol;Acc:HGNC:19097]              | 200 | 0.53 | 0.1327 | 4.0 | 6.0E-05 | 1.9E-04 |
| ENSG00000139178 | C1RL       | complement C1r subcomponent like [Source:HGNC Symbol;Acc:HGNC:21265]                         | 45  | 2.13 | 0.5298 | 4.0 | 5.8E-05 | 1.9E-04 |
| ENSG00000267226 | MALT1-AS1  | MALT1 antisense RNA 1 [Source:HGNC Symbol;Acc:HGNC:55306]                                    | 17  | 2.08 | 0.5176 | 4.0 | 5.7E-05 | 1.8E-04 |
| ENSG00000251593 | MSNP1      | moesin pseudogene 1 [Source:HGNC Symbol;Acc:HGNC:7374]                                       | 11  | 2.69 | 0.6684 | 4.0 | 5.7E-05 | 1.8E-04 |
| ENSG00000233654 | ENSG000002 | novel transcript                                                                             | 33  | 1.43 | 0.3536 | 4.0 | 5.6E-05 | 1.8E-04 |
| ENSG00000088970 | KIZ        | kizuna centrosomal protein [Source:HGNC Symbol;Acc:HGNC:15865]                               | 108 | 0.72 | 0.1793 | 4.0 | 5.5E-05 | 1.8E-04 |
| ENSG00000171160 | MORN4      | MORN repeat containing 4 [Source:HGNC Symbol;Acc:HGNC:24001]                                 | 190 | 0.57 | 0.1411 | 4.0 | 5.3E-05 | 1.7E-04 |
| ENSG00000124191 | TOX2       | TOX high mobility group box family member 2 [Source:HGNC Symbol;Acc:HGNC:16095]              | 62  | 1.05 | 0.2587 | 4.0 | 5.3E-05 | 1.7E-04 |
| ENSG00000268916 | CSAG3      | CSAG family member 3 [Source:HGNC Symbol;Acc:HGNC:26237]                                     | 234 | 0.50 | 0.1244 | 4.0 | 5.3E-05 | 1.7E-04 |
| ENSG00000185875 | THNSL1     | threonine synthase like 1 [Source:HGNC Symbol;Acc:HGNC:26160]                                | 103 | 0.74 | 0.1840 | 4.0 | 5.2E-05 | 1.7E-04 |
| ENSG00000162620 | LRRIQ3     | leucine rich repeats and IQ motif containing 3 [Source:HGNC Symbol;Acc:HGNC:28318]           | 16  | 2.16 | 0.5328 | 4.1 | 5.0E-05 | 1.6E-04 |
| ENSG00000145934 | TENM2      | teneurin transmembrane protein 2 [Source:HGNC Symbol;Acc:HGNC:29943]                         | 18  | 1.97 | 0.4839 | 4.1 | 4.8E-05 | 1.6E-04 |
| ENSG00000213213 | CCDC183    | coiled-coil domain containing 183 [Source:HGNC Symbol;Acc:HGNC:28236]                        | 46  | 1.12 | 0.2752 | 4.1 | 4.6E-05 | 1.5E-04 |
| ENSG00000123570 | RAB9B      | RAB9B, member RAS oncogene family [Source:HGNC Symbol;Acc:HGNC:14090]                        | 48  | 1.10 | 0.2691 | 4.1 | 4.6E-05 | 1.5E-04 |
| ENSG00000144488 | ESPNL      | espin like [Source:HGNC Symbol;Acc:HGNC:27937]                                               | 9   | 3.38 | 0.8273 | 4.1 | 4.5E-05 | 1.5E-04 |
| ENSG00000078098 | FAP        | fibroblast activation protein alpha [Source:HGNC Symbol;Acc:HGNC:3590]                       | 126 | 0.70 | 0.1705 | 4.1 | 4.4E-05 | 1.4E-04 |
| ENSG00000196081 | ZNF724     | zinc finger protein 724 [Source:HGNC Symbol;Acc:HGNC:32460]                                  | 36  | 1.28 | 0.3128 | 4.1 | 4.3E-05 | 1.4E-04 |
| ENSG00000183840 | GPR39      | G protein-coupled receptor 39 [Source:HGNC Symbol;Acc:HGNC:4496]                             | 145 | 0.70 | 0.1707 | 4.1 | 4.3E-05 | 1.4E-04 |
| ENSG00000119547 | ONECUT2    | one cut homeobox 2 [Source:HGNC Symbol;Acc:HGNC:8139]                                        | 207 | 0.52 | 0.1268 | 4.1 | 4.3E-05 | 1.4E-04 |
| ENSG00000188512 | ENSG000001 | cytochrome c, somatic (CYCS) pseudogene                                                      | 72  | 0.92 | 0.2258 | 4.1 | 4.2E-05 | 1.4E-04 |
| ENSG00000265185 | SNORD3B-1  | small nucleolar RNA, C/D box 3B-1 [Source:HGNC Symbol;Acc:HGNC:10168]                        | 212 | 0.54 | 0.1310 | 4.1 | 4.1E-05 | 1.4E-04 |
| ENSG00000253837 | ENSG000002 | novel transcript                                                                             | 5   | 5.72 | 1.3942 | 4.1 | 4.1E-05 | 1.3E-04 |
| ENSG00000251179 | TMEM92-AS  | TMEM92 antisense RNA 1 [Source:HGNC Symbol;Acc:HGNC:50442]                                   | 5   | 5.75 | 1.4008 | 4.1 | 4.1E-05 | 1.3E-04 |
| ENSG00000168298 | H1-4       | H1.4 linker histone, cluster member [Source:HGNC Symbol;Acc:HGNC:4718]                       | 20  | 1.83 | 0.4446 | 4.1 | 4.0E-05 | 1.3E-04 |
| ENSG00000151470 | C4orf33    | chromosome 4 open reading frame 33 [Source:HGNC Symbol;Acc:HGNC:27025]                       | 157 | 0.60 | 0.1462 | 4.1 | 4.0E-05 | 1.3E-04 |
| ENSG00000204965 | PCDHA5     | protocadherin alpha 5 [Source:HGNC Symbol;Acc:HGNC:8671]                                     | 9   | 4.69 | 1.1414 | 4.1 | 4.0E-05 | 1.3E-04 |

|                 |            |                                                                                                    |      |      |        |     |         |         |
|-----------------|------------|----------------------------------------------------------------------------------------------------|------|------|--------|-----|---------|---------|
| ENSG00000263072 | ZNF213-AS1 | ZNF213 antisense RNA 1 (head to head) [Source:HGNC Symbol;Acc:HGNC:50505]                          | 143  | 0.65 | 0.1583 | 4.1 | 3.9E-05 | 1.3E-04 |
| ENSG00000258477 | PPIAP6     | peptidylprolyl isomerase A pseudogene 6 [Source:HGNC Symbol;Acc:HGNC:20028]                        | 34   | 1.38 | 0.3349 | 4.1 | 3.7E-05 | 1.2E-04 |
| ENSG00000245275 | SAP30L-AS1 | SAP30L antisense RNA 1 (head to head) [Source:HGNC Symbol;Acc:HGNC:26760]                          | 92   | 0.82 | 0.1994 | 4.1 | 3.6E-05 | 1.2E-04 |
| ENSG00000287625 | ENSG000002 | novel transcript                                                                                   | 55   | 1.08 | 0.2621 | 4.1 | 3.5E-05 | 1.2E-04 |
| ENSG00000234362 | LINC01914  | long intergenic non-protein coding RNA 1914 [Source:HGNC Symbol;Acc:HGNC:52733]                    | 9    | 4.76 | 1.1505 | 4.1 | 3.5E-05 | 1.2E-04 |
| ENSG00000221866 | PLXNA4     | plexin A4 [Source:HGNC Symbol;Acc:HGNC:9102]                                                       | 46   | 1.18 | 0.2842 | 4.1 | 3.5E-05 | 1.1E-04 |
| ENSG00000226499 | ENSG000002 | ribosomal protein S2 (RPS2) pseudogene                                                             | 26   | 1.60 | 0.3858 | 4.1 | 3.4E-05 | 1.1E-04 |
| ENSG00000146666 | LINC00525  | long intergenic non-protein coding RNA 525 [Source:HGNC Symbol;Acc:HGNC:40290]                     | 8    | 5.48 | 1.3236 | 4.1 | 3.4E-05 | 1.1E-04 |
| ENSG00000178187 | ZNF454     | zinc finger protein 454 [Source:HGNC Symbol;Acc:HGNC:21200]                                        | 7    | 5.41 | 1.3038 | 4.1 | 3.4E-05 | 1.1E-04 |
| ENSG00000231721 | LINC-PINT  | long intergenic non-protein coding RNA, p53 induced transcript [Source:HGNC Symbol;Acc:HGNC:26885] | 41   | 1.25 | 0.3014 | 4.2 | 3.3E-05 | 1.1E-04 |
| ENSG00000287733 | ENSG000002 | novel transcript                                                                                   | 35   | 1.31 | 0.3157 | 4.2 | 3.2E-05 | 1.1E-04 |
| ENSG00000106089 | STX1A      | syntaxin 1A [Source:HGNC Symbol;Acc:HGNC:11433]                                                    | 157  | 0.64 | 0.1537 | 4.2 | 2.9E-05 | 9.5E-05 |
| ENSG00000267053 | ENSG000002 | novel transcript                                                                                   | 14   | 2.35 | 0.5593 | 4.2 | 2.7E-05 | 8.9E-05 |
| ENSG00000154529 | CNTNAP3B   | contactin associated protein family member 3B [Source:HGNC Symbol;Acc:HGNC:32035]                  | 12   | 2.72 | 0.6472 | 4.2 | 2.6E-05 | 8.7E-05 |
| ENSG00000185046 | ANKS1B     | ankyrin repeat and sterile alpha motif domain containing 1B [Source:HGNC Symbol;Acc:HGNC:24600]    | 15   | 2.18 | 0.5184 | 4.2 | 2.5E-05 | 8.5E-05 |
| ENSG00000094841 | UPRT       | uracil phosphoribosyltransferase homolog [Source:HGNC Symbol;Acc:HGNC:28334]                       | 181  | 0.59 | 0.1403 | 4.2 | 2.5E-05 | 8.4E-05 |
| ENSG00000154309 | DISP1      | dispatched RND transporter family member 1 [Source:HGNC Symbol;Acc:HGNC:19711]                     | 35   | 1.34 | 0.3180 | 4.2 | 2.5E-05 | 8.3E-05 |
| ENSG00000164002 | EXO5       | exonuclease 5 [Source:HGNC Symbol;Acc:HGNC:26115]                                                  | 180  | 0.58 | 0.1368 | 4.2 | 2.3E-05 | 7.8E-05 |
| ENSG00000160256 | FAM207A    | family with sequence similarity 207 member A [Source:HGNC Symbol;Acc:HGNC:15811]                   | 1310 | 0.50 | 0.1184 | 4.2 | 2.3E-05 | 7.6E-05 |
| ENSG00000198453 | ZNF568     | zinc finger protein 568 [Source:HGNC Symbol;Acc:HGNC:25392]                                        | 157  | 0.65 | 0.1527 | 4.2 | 2.3E-05 | 7.5E-05 |
| ENSG00000156958 | GALK2      | galactokinase 2 [Source:HGNC Symbol;Acc:HGNC:4119]                                                 | 140  | 0.66 | 0.1558 | 4.2 | 2.3E-05 | 7.5E-05 |
| ENSG00000227124 | ZNF717     | zinc finger protein 717 [Source:HGNC Symbol;Acc:HGNC:29448]                                        | 60   | 1.09 | 0.2562 | 4.3 | 2.1E-05 | 7.1E-05 |
| ENSG00000137877 | SPTBN5     | spectrin beta, non-erythrocytic 5 [Source:HGNC Symbol;Acc:HGNC:15680]                              | 106  | 0.79 | 0.1853 | 4.3 | 2.1E-05 | 7.1E-05 |
| ENSG00000196139 | AKR1C3     | aldo-keto reductase family 1 member C3 [Source:HGNC Symbol;Acc:HGNC:386]                           | 19   | 1.97 | 0.4631 | 4.3 | 2.1E-05 | 6.9E-05 |
| ENSG00000101276 | SLC52A3    | solute carrier family 52 member 3 [Source:HGNC Symbol;Acc:HGNC:16187]                              | 175  | 0.59 | 0.1374 | 4.3 | 2.0E-05 | 6.7E-05 |
| ENSG00000273143 | DUSP5-DT   | DUSP5 divergent transcript [Source:HGNC Symbol;Acc:HGNC:55154]                                     | 10   | 3.55 | 0.8329 | 4.3 | 2.0E-05 | 6.7E-05 |
| ENSG00000184986 | TMEM121    | transmembrane protein 121 [Source:HGNC Symbol;Acc:HGNC:20511]                                      | 134  | 0.73 | 0.1719 | 4.3 | 1.9E-05 | 6.5E-05 |
| ENSG00000253716 | MINCR      | MYC-induced long non-coding RNA [Source:HGNC Symbol;Acc:HGNC:51653]                                | 140  | 0.68 | 0.1592 | 4.3 | 1.9E-05 | 6.3E-05 |
| ENSG00000260442 | ATP2A1-AS1 | ATP2A1 antisense RNA 1 [Source:HGNC Symbol;Acc:HGNC:51370]                                         | 17   | 2.21 | 0.5161 | 4.3 | 1.9E-05 | 6.3E-05 |
| ENSG00000197191 | CYSRT1     | cysteine rich tail 1 [Source:HGNC Symbol;Acc:HGNC:30529]                                           | 94   | 0.84 | 0.1966 | 4.3 | 1.8E-05 | 6.1E-05 |
| ENSG00000119943 | PYROXD2    | pyridine nucleotide-disulphide oxidoreductase domain 2 [Source:HGNC Symbol;Acc:HGNC:23517]         | 48   | 1.25 | 0.2919 | 4.3 | 1.8E-05 | 6.1E-05 |
| ENSG00000164221 | CCDC112    | coiled-coil domain containing 112 [Source:HGNC Symbol;Acc:HGNC:28599]                              | 72   | 0.92 | 0.2154 | 4.3 | 1.8E-05 | 6.0E-05 |
| ENSG00000269959 | SPACA6P-AS | SPACA6P antisense RNA [Source:HGNC Symbol;Acc:HGNC:49383]                                          | 32   | 1.48 | 0.3453 | 4.3 | 1.8E-05 | 5.9E-05 |
| ENSG00000246334 | PRR7-AS1   | PRR7 antisense RNA 1 [Source:HGNC Symbol;Acc:HGNC:27961]                                           | 25   | 1.66 | 0.3859 | 4.3 | 1.8E-05 | 5.9E-05 |
| ENSG00000242732 | RTL5       | retrotransposon Gag like 5 [Source:HGNC Symbol;Acc:HGNC:29430]                                     | 54   | 1.14 | 0.2663 | 4.3 | 1.7E-05 | 5.8E-05 |
| ENSG00000137720 | C11orf1    | chromosome 11 open reading frame 1 [Source:HGNC Symbol;Acc:HGNC:1163]                              | 171  | 0.62 | 0.1439 | 4.3 | 1.7E-05 | 5.8E-05 |
| ENSG00000183793 | NPIPA5     | nuclear pore complex interacting protein family member A5 [Source:HGNC Symbol;Acc:HGNC:41980]      | 9    | 3.77 | 0.8749 | 4.3 | 1.7E-05 | 5.6E-05 |
| ENSG00000196693 | ZNF33B     | zinc finger protein 33B [Source:HGNC Symbol;Acc:HGNC:13097]                                        | 209  | 0.56 | 0.1291 | 4.3 | 1.7E-05 | 5.6E-05 |
| ENSG00000197568 | HHLA3      | HERV-H LTR-associating 3 [Source:HGNC Symbol;Acc:HGNC:4906]                                        | 57   | 1.08 | 0.2503 | 4.3 | 1.6E-05 | 5.5E-05 |
| ENSG00000146592 | CREB5      | cAMP responsive element binding protein 5 [Source:HGNC Symbol;Acc:HGNC:16844]                      | 53   | 1.10 | 0.2538 | 4.3 | 1.6E-05 | 5.4E-05 |
| ENSG00000165983 | PTER       | phosphotriesterase related [Source:HGNC Symbol;Acc:HGNC:9590]                                      | 174  | 0.63 | 0.1462 | 4.3 | 1.6E-05 | 5.4E-05 |
| ENSG00000065615 | CYB5R4     | cytochrome b5 reductase 4 [Source:HGNC Symbol;Acc:HGNC:20147]                                      | 243  | 0.51 | 0.1180 | 4.3 | 1.6E-05 | 5.3E-05 |

|                 |            |                                                                                             |     |      |        |     |         |         |
|-----------------|------------|---------------------------------------------------------------------------------------------|-----|------|--------|-----|---------|---------|
| ENSG00000184517 | ZFP1       | ZFP1 zinc finger protein [Source:HGNC Symbol;Acc:HGNC:23328]                                | 143 | 0.66 | 0.1519 | 4.3 | 1.5E-05 | 5.1E-05 |
| ENSG00000286966 | ENSG000002 | novel transcript                                                                            | 10  | 3.28 | 0.7558 | 4.3 | 1.4E-05 | 4.9E-05 |
| ENSG00000259230 | LINC02323  | long intergenic non-protein coding RNA 2323 [Source:HGNC Symbol;Acc:HGNC:53242]             | 19  | 1.99 | 0.4588 | 4.3 | 1.4E-05 | 4.7E-05 |
| ENSG00000204764 | RANBP17    | RAN binding protein 17 [Source:HGNC Symbol;Acc:HGNC:14428]                                  | 165 | 0.63 | 0.1445 | 4.4 | 1.3E-05 | 4.5E-05 |
| ENSG00000185920 | PTCH1      | patched 1 [Source:HGNC Symbol;Acc:HGNC:9585]                                                | 212 | 0.57 | 0.1301 | 4.4 | 1.2E-05 | 4.2E-05 |
| ENSG00000267454 | ZNF582-DT  | ZNF582 divergent transcript [Source:HGNC Symbol;Acc:HGNC:25213]                             | 39  | 1.37 | 0.3119 | 4.4 | 1.2E-05 | 4.1E-05 |
| ENSG00000176593 | ENSG000001 | novel transcript, antisense to ZNF606                                                       | 123 | 0.76 | 0.1745 | 4.4 | 1.2E-05 | 4.1E-05 |
| NA              | 13         | NA                                                                                          | 5   | 5.95 | 1.3570 | 4.4 | 1.2E-05 | 4.1E-05 |
| ENSG00000172986 | GXYLT2     | glucoside xylosyltransferase 2 [Source:HGNC Symbol;Acc:HGNC:33383]                          | 104 | 0.83 | 0.1885 | 4.4 | 1.2E-05 | 4.0E-05 |
| ENSG00000255248 | MIR100HG   | mir-100-let-7a-2-mir-125b-1 cluster host gene [Source:HGNC Symbol;Acc:HGNC:39522]           | 226 | 0.57 | 0.1293 | 4.4 | 1.2E-05 | 4.0E-05 |
| ENSG00000147036 | LANCL3     | LanC like 3 [Source:HGNC Symbol;Acc:HGNC:24767]                                             | 137 | 0.70 | 0.1580 | 4.4 | 1.1E-05 | 3.7E-05 |
| ENSG00000115041 | KCNIP3     | potassium voltage-gated channel interacting protein 3 [Source:HGNC Symbol;Acc:HGNC:15523]   | 51  | 1.16 | 0.2627 | 4.4 | 1.1E-05 | 3.7E-05 |
| ENSG00000153234 | NR4A2      | nuclear receptor subfamily 4 group A member 2 [Source:HGNC Symbol;Acc:HGNC:7981]            | 80  | 0.95 | 0.2165 | 4.4 | 1.1E-05 | 3.7E-05 |
| ENSG00000140961 | OSGIN1     | oxidative stress induced growth inhibitor 1 [Source:HGNC Symbol;Acc:HGNC:30093]             | 132 | 0.76 | 0.1725 | 4.4 | 1.1E-05 | 3.7E-05 |
| ENSG00000250508 | LINC02701  | long intergenic non-protein coding RNA 2701 [Source:HGNC Symbol;Acc:HGNC:54216]             | 10  | 4.31 | 0.9754 | 4.4 | 1.0E-05 | 3.5E-05 |
| ENSG00000179148 | ALOXE3     | arachidonate lipoxygenase 3 [Source:HGNC Symbol;Acc:HGNC:13743]                             | 175 | 0.72 | 0.1632 | 4.4 | 9.9E-06 | 3.4E-05 |
| ENSG00000215146 | ENSG000002 | zinc finger protein pseudogene                                                              | 33  | 1.52 | 0.3437 | 4.4 | 9.9E-06 | 3.4E-05 |
| ENSG00000153896 | ZNF599     | zinc finger protein 599 [Source:HGNC Symbol;Acc:HGNC:26408]                                 | 136 | 0.70 | 0.1582 | 4.4 | 9.6E-06 | 3.4E-05 |
| ENSG00000217236 | SP9        | Sp9 transcription factor [Source:HGNC Symbol;Acc:HGNC:30690]                                | 12  | 2.81 | 0.6353 | 4.4 | 9.6E-06 | 3.3E-05 |
| ENSG00000272695 | GAS6-DT    | GAS6 divergent transcript [Source:HGNC Symbol;Acc:HGNC:43694]                               | 11  | 3.18 | 0.7178 | 4.4 | 9.4E-06 | 3.3E-05 |
| ENSG00000147606 | SLC26A7    | solute carrier family 26 member 7 [Source:HGNC Symbol;Acc:HGNC:14467]                       | 10  | 4.31 | 0.9672 | 4.5 | 8.4E-06 | 2.9E-05 |
| ENSG00000183386 | FHL3       | four and a half LIM domains 3 [Source:HGNC Symbol;Acc:HGNC:3704]                            | 134 | 0.70 | 0.1567 | 4.5 | 8.2E-06 | 2.9E-05 |
| ENSG00000198839 | ZNF277     | zinc finger protein 277 [Source:HGNC Symbol;Acc:HGNC:13070]                                 | 186 | 0.60 | 0.1335 | 4.5 | 7.8E-06 | 2.7E-05 |
| NA              | 20         | NA                                                                                          | 10  | 3.89 | 0.8681 | 4.5 | 7.5E-06 | 2.6E-05 |
| ENSG00000262585 | LINC01979  | long intergenic non-protein coding RNA 1979 [Source:HGNC Symbol;Acc:HGNC:52807]             | 6   | 6.05 | 1.3505 | 4.5 | 7.5E-06 | 2.6E-05 |
| ENSG00000285517 | ENSG000002 | long intergenic non-protein coding RNA 941                                                  | 11  | 3.40 | 0.7596 | 4.5 | 7.4E-06 | 2.6E-05 |
| ENSG00000126778 | SIX1       | SIX homeobox 1 [Source:HGNC Symbol;Acc:HGNC:10887]                                          | 128 | 0.78 | 0.1742 | 4.5 | 7.3E-06 | 2.6E-05 |
| ENSG00000104427 | ZC2HC1A    | zinc finger C2HC-type containing 1A [Source:HGNC Symbol;Acc:HGNC:24277]                     | 86  | 0.91 | 0.2011 | 4.5 | 6.8E-06 | 2.4E-05 |
| ENSG00000198838 | RYR3       | ryanodine receptor 3 [Source:HGNC Symbol;Acc:HGNC:10485]                                    | 71  | 1.00 | 0.2209 | 4.5 | 6.6E-06 | 2.3E-05 |
| ENSG00000132329 | RAMP1      | receptor activity modifying protein 1 [Source:HGNC Symbol;Acc:HGNC:9843]                    | 50  | 1.19 | 0.2641 | 4.5 | 6.1E-06 | 2.2E-05 |
| ENSG00000213104 | NPM1P46    | nucleophosmin 1 pseudogene 46 [Source:HGNC Symbol;Acc:HGNC:45225]                           | 74  | 0.98 | 0.2163 | 4.5 | 6.0E-06 | 2.1E-05 |
| ENSG00000155666 | KDM8       | lysine demethylase 8 [Source:HGNC Symbol;Acc:HGNC:25840]                                    | 57  | 1.18 | 0.2599 | 4.5 | 5.9E-06 | 2.1E-05 |
| ENSG00000107614 | TRDMT1     | tRNA aspartic acid methyltransferase 1 [Source:HGNC Symbol;Acc:HGNC:2977]                   | 52  | 1.18 | 0.2594 | 4.5 | 5.9E-06 | 2.1E-05 |
| ENSG00000231187 | ENSG000002 | novel transcript                                                                            | 41  | 1.33 | 0.2934 | 4.5 | 5.9E-06 | 2.1E-05 |
| ENSG00000198182 | ZNF607     | zinc finger protein 607 [Source:HGNC Symbol;Acc:HGNC:28192]                                 | 199 | 0.61 | 0.1344 | 4.5 | 5.8E-06 | 2.1E-05 |
| ENSG00000128271 | ADORA2A    | adenosine A2a receptor [Source:HGNC Symbol;Acc:HGNC:263]                                    | 30  | 1.64 | 0.3623 | 4.5 | 5.7E-06 | 2.0E-05 |
| ENSG00000106404 | CLDN15     | claudin 15 [Source:HGNC Symbol;Acc:HGNC:2036]                                               | 175 | 0.69 | 0.1511 | 4.5 | 5.6E-06 | 2.0E-05 |
| ENSG00000127399 | LRRC61     | leucine rich repeat containing 61 [Source:HGNC Symbol;Acc:HGNC:21704]                       | 88  | 0.90 | 0.1975 | 4.5 | 5.6E-06 | 2.0E-05 |
| ENSG00000168237 | GLYCTK     | glycerate kinase [Source:HGNC Symbol;Acc:HGNC:24247]                                        | 96  | 0.87 | 0.1905 | 4.5 | 5.6E-06 | 2.0E-05 |
| ENSG00000149380 | P4HA3      | prolyl 4-hydroxylase subunit alpha 3 [Source:HGNC Symbol;Acc:HGNC:30135]                    | 52  | 1.24 | 0.2725 | 4.5 | 5.5E-06 | 2.0E-05 |
| ENSG00000223345 | H2BP1      | H2B histone pseudogene 1 [Source:HGNC Symbol;Acc:HGNC:20560]                                | 13  | 2.88 | 0.6335 | 4.5 | 5.4E-06 | 1.9E-05 |
| ENSG00000163528 | CHCHD4     | coiled-coil-helix-coiled-coil-helix domain containing 4 [Source:HGNC Symbol;Acc:HGNC:26467] | 296 | 0.50 | 0.1101 | 4.6 | 5.2E-06 | 1.9E-05 |



|                 |            |                                                                                               |      |      |        |     |         |         |
|-----------------|------------|-----------------------------------------------------------------------------------------------|------|------|--------|-----|---------|---------|
| ENSG00000214510 | SPINK13    | serine peptidase inhibitor Kazal type 13 [Source:HGNC Symbol;Acc:HGNC:27200]                  | 22   | 2.00 | 0.4392 | 4.6 | 5.2E-06 | 1.9E-05 |
| ENSG00000160183 | TMPRSS3    | transmembrane serine protease 3 [Source:HGNC Symbol;Acc:HGNC:11877]                           | 10   | 5.83 | 1.2783 | 4.6 | 5.2E-06 | 1.8E-05 |
| ENSG00000182310 | SPACA6     | sperm acrosome associated 6 [Source:HGNC Symbol;Acc:HGNC:27113]                               | 280  | 0.51 | 0.1122 | 4.6 | 5.0E-06 | 1.8E-05 |
| ENSG00000165238 | WNK2       | WNK lysine deficient protein kinase 2 [Source:HGNC Symbol;Acc:HGNC:14542]                     | 98   | 0.90 | 0.1977 | 4.6 | 4.9E-06 | 1.8E-05 |
| ENSG00000248323 | LUCAT1     | lung cancer associated transcript 1 [Source:HGNC Symbol;Acc:HGNC:48498]                       | 163  | 0.66 | 0.1446 | 4.6 | 4.9E-06 | 1.8E-05 |
| ENSG00000197110 | IFNL3      | interferon lambda 3 [Source:HGNC Symbol;Acc:HGNC:18365]                                       | 15   | 2.45 | 0.5368 | 4.6 | 4.9E-06 | 1.8E-05 |
| ENSG00000285043 | ENSG000002 | novel protein                                                                                 | 55   | 1.17 | 0.2552 | 4.6 | 4.9E-06 | 1.7E-05 |
| ENSG00000158882 | TOMM40L    | translocase of outer mitochondrial membrane 40 like [Source:HGNC Symbol;Acc:HGNC:25756]       | 216  | 0.57 | 0.1249 | 4.6 | 4.8E-06 | 1.7E-05 |
| ENSG00000171840 | NINJ2      | ninjurin 2 [Source:HGNC Symbol;Acc:HGNC:7825]                                                 | 49   | 1.28 | 0.2792 | 4.6 | 4.7E-06 | 1.7E-05 |
| ENSG00000067836 | ROGDI      | rogdi atypical leucine zipper [Source:HGNC Symbol;Acc:HGNC:29478]                             | 164  | 0.66 | 0.1445 | 4.6 | 4.7E-06 | 1.7E-05 |
| ENSG00000254332 | ENSG000002 | tropomyosin 4 (TPM4) pseudogene                                                               | 30   | 1.66 | 0.3621 | 4.6 | 4.6E-06 | 1.7E-05 |
| ENSG00000198482 | ZNF808     | zinc finger protein 808 [Source:HGNC Symbol;Acc:HGNC:33230]                                   | 90   | 0.90 | 0.1959 | 4.6 | 4.5E-06 | 1.6E-05 |
| ENSG00000197114 | ZGPAT      | zinc finger CCCH-type and G-patch domain containing [Source:HGNC Symbol;Acc:HGNC:15948]       | 196  | 0.65 | 0.1414 | 4.6 | 4.2E-06 | 1.5E-05 |
| ENSG00000232187 | FTH1P7     | ferritin heavy chain 1 pseudogene 7 [Source:HGNC Symbol;Acc:HGNC:3994]                        | 136  | 0.80 | 0.1730 | 4.6 | 4.1E-06 | 1.5E-05 |
| ENSG00000169955 | ZNF747     | zinc finger protein 747 [Source:HGNC Symbol;Acc:HGNC:28350]                                   | 89   | 0.95 | 0.2060 | 4.6 | 4.0E-06 | 1.4E-05 |
| ENSG00000044459 | CNTLN      | centlein [Source:HGNC Symbol;Acc:HGNC:23432]                                                  | 201  | 0.61 | 0.1321 | 4.6 | 4.0E-06 | 1.4E-05 |
| ENSG00000163686 | ABHD6      | abhydrolase domain containing 6, acylglycerol lipase [Source:HGNC Symbol;Acc:HGNC:21398]      | 176  | 0.67 | 0.1447 | 4.6 | 4.0E-06 | 1.4E-05 |
| ENSG00000106004 | HOXA5      | homeobox A5 [Source:HGNC Symbol;Acc:HGNC:5106]                                                | 108  | 0.85 | 0.1833 | 4.6 | 3.9E-06 | 1.4E-05 |
| ENSG00000163661 | PTX3       | pentraxin 3 [Source:HGNC Symbol;Acc:HGNC:9692]                                                | 42   | 1.47 | 0.3187 | 4.6 | 3.8E-06 | 1.4E-05 |
| ENSG00000186642 | PDE2A      | phosphodiesterase 2A [Source:HGNC Symbol;Acc:HGNC:8777]                                       | 53   | 1.24 | 0.2690 | 4.6 | 3.7E-06 | 1.4E-05 |
| ENSG00000188669 | ZNF582     | zinc finger protein 582 [Source:HGNC Symbol;Acc:HGNC:26421]                                   | 67   | 1.06 | 0.2302 | 4.6 | 3.7E-06 | 1.4E-05 |
| ENSG00000204681 | GABBR1     | gamma-aminobutyric acid type B receptor subunit 1 [Source:HGNC Symbol;Acc:HGNC:4070]          | 85   | 0.96 | 0.2070 | 4.6 | 3.5E-06 | 1.3E-05 |
| ENSG00000152669 | CCNO       | cyclin O [Source:HGNC Symbol;Acc:HGNC:18576]                                                  | 258  | 0.54 | 0.1173 | 4.6 | 3.4E-06 | 1.2E-05 |
| ENSG00000225206 | MIR137HG   | MIR137 host gene [Source:HGNC Symbol;Acc:HGNC:42871]                                          | 167  | 0.66 | 0.1411 | 4.7 | 3.3E-06 | 1.2E-05 |
| ENSG00000134321 | RSAD2      | radical S-adenosyl methionine domain containing 2 [Source:HGNC Symbol;Acc:HGNC:30908]         | 1225 | 0.82 | 0.1762 | 4.7 | 3.3E-06 | 1.2E-05 |
| ENSG00000230555 | ENSG000002 | novel transcript                                                                              | 55   | 1.17 | 0.2513 | 4.7 | 3.2E-06 | 1.2E-05 |
| ENSG00000127507 | ADGRE2     | adhesion G protein-coupled receptor E2 [Source:HGNC Symbol;Acc:HGNC:3337]                     | 263  | 0.54 | 0.1151 | 4.7 | 3.2E-06 | 1.2E-05 |
| ENSG00000275494 | ENSG000002 | novel transcript                                                                              | 35   | 1.53 | 0.3277 | 4.7 | 3.1E-06 | 1.1E-05 |
| ENSG00000233006 | MIR3936HG  | MIR3936 host gene [Source:HGNC Symbol;Acc:HGNC:40538]                                         | 85   | 1.00 | 0.2132 | 4.7 | 2.9E-06 | 1.1E-05 |
| ENSG00000152467 | ZSCAN1     | zinc finger and SCAN domain containing 1 [Source:HGNC Symbol;Acc:HGNC:23712]                  | 60   | 1.14 | 0.2442 | 4.7 | 2.9E-06 | 1.1E-05 |
| ENSG00000237440 | ZNF737     | zinc finger protein 737 [Source:HGNC Symbol;Acc:HGNC:32468]                                   | 59   | 1.21 | 0.2582 | 4.7 | 2.8E-06 | 1.0E-05 |
| ENSG00000143512 | HHIPL2     | HHIP like 2 [Source:HGNC Symbol;Acc:HGNC:25842]                                               | 13   | 2.90 | 0.6195 | 4.7 | 2.8E-06 | 1.0E-05 |
| ENSG00000115718 | PROC       | protein C, inactivator of coagulation factors Va and VIIIa [Source:HGNC Symbol;Acc:HGNC:9451] | 42   | 1.42 | 0.3028 | 4.7 | 2.8E-06 | 1.0E-05 |
| ENSG00000102595 | UGGT2      | UDP-glucose glycoprotein glucosyltransferase 2 [Source:HGNC Symbol;Acc:HGNC:15664]            | 295  | 0.51 | 0.1091 | 4.7 | 2.7E-06 | 1.0E-05 |
| ENSG00000061656 | SPAG4      | sperm associated antigen 4 [Source:HGNC Symbol;Acc:HGNC:11214]                                | 228  | 0.58 | 0.1233 | 4.7 | 2.7E-06 | 9.9E-06 |
| ENSG00000047634 | SCML1      | Scm polycomb group protein like 1 [Source:HGNC Symbol;Acc:HGNC:10580]                         | 90   | 0.93 | 0.1980 | 4.7 | 2.7E-06 | 9.9E-06 |
| ENSG00000253731 | PCDHGA6    | protocadherin gamma subfamily A, 6 [Source:HGNC Symbol;Acc:HGNC:8704]                         | 19   | 2.24 | 0.4758 | 4.7 | 2.6E-06 | 9.7E-06 |
| ENSG00000167656 | LY6D       | lymphocyte antigen 6 family member D [Source:HGNC Symbol;Acc:HGNC:13348]                      | 225  | 0.58 | 0.1229 | 4.7 | 2.6E-06 | 9.5E-06 |
| ENSG00000119242 | CCDC92     | coiled-coil domain containing 92 [Source:HGNC Symbol;Acc:HGNC:29563]                          | 61   | 1.12 | 0.2373 | 4.7 | 2.6E-06 | 9.5E-06 |
| ENSG00000167232 | ZNF91      | zinc finger protein 91 [Source:HGNC Symbol;Acc:HGNC:13166]                                    | 245  | 0.58 | 0.1242 | 4.7 | 2.5E-06 | 9.3E-06 |
| ENSG00000164619 | BMPER      | BMP binding endothelial regulator [Source:HGNC Symbol;Acc:HGNC:24154]                         | 85   | 0.93 | 0.1970 | 4.7 | 2.5E-06 | 9.3E-06 |
| ENSG00000188493 | C19orf54   | chromosome 19 open reading frame 54 [Source:HGNC Symbol;Acc:HGNC:24758]                       | 307  | 0.51 | 0.1092 | 4.7 | 2.5E-06 | 9.1E-06 |

|                 |                 |                                                                                                                     |     |      |        |     |         |         |
|-----------------|-----------------|---------------------------------------------------------------------------------------------------------------------|-----|------|--------|-----|---------|---------|
| ENSG00000143479 | DYRK3           | dual specificity tyrosine phosphorylation regulated kinase 3 [Source:HGNC Symbol;Acc:HGNC:3094]                     | 100 | 0.91 | 0.1934 | 4.7 | 2.4E-06 | 9.0E-06 |
| ENSG00000173926 | MARCHF3         | membrane associated ring-CH-type finger 3 [Source:HGNC Symbol;Acc:HGNC:28728]                                       | 49  | 1.30 | 0.2752 | 4.7 | 2.4E-06 | 8.8E-06 |
| ENSG00000135111 | TBX3            | T-box transcription factor 3 [Source:HGNC Symbol;Acc:HGNC:11602]                                                    | 127 | 0.84 | 0.1776 | 4.7 | 2.3E-06 | 8.6E-06 |
| ENSG00000161647 | MPP3            | membrane palmitoylated protein 3 [Source:HGNC Symbol;Acc:HGNC:7221]                                                 | 186 | 0.63 | 0.1342 | 4.7 | 2.3E-06 | 8.6E-06 |
| ENSG00000262136 | NQO1-DT         | NQO1 divergent transcript [Source:HGNC Symbol;Acc:HGNC:55344]                                                       | 21  | 2.10 | 0.4445 | 4.7 | 2.3E-06 | 8.6E-06 |
| ENSG00000172260 | NEGR1           | neuronal growth regulator 1 [Source:HGNC Symbol;Acc:HGNC:17302]                                                     | 11  | 3.79 | 0.8020 | 4.7 | 2.3E-06 | 8.4E-06 |
| ENSG00000262152 | LINC00514       | long intergenic non-protein coding RNA 514 [Source:HGNC Symbol;Acc:HGNC:27549]                                      | 120 | 0.79 | 0.1669 | 4.7 | 2.2E-06 | 8.2E-06 |
| ENSG00000116701 | NCF2            | neutrophil cytosolic factor 2 [Source:HGNC Symbol;Acc:HGNC:7661]                                                    | 122 | 0.81 | 0.1717 | 4.7 | 2.2E-06 | 8.1E-06 |
| ENSG00000218226 | TATDN2P2        | TatD DNase domain containing 2 pseudogene 2 [Source:HGNC Symbol;Acc:HGNC:39255]                                     | 80  | 1.00 | 0.2104 | 4.7 | 2.2E-06 | 8.1E-06 |
| ENSG00000131650 | KREMEN2         | kringle containing transmembrane protein 2 [Source:HGNC Symbol;Acc:HGNC:18797]                                      | 188 | 0.66 | 0.1402 | 4.7 | 2.1E-06 | 7.9E-06 |
| ENSG00000204174 | NPY4R           | neuropeptide Y receptor Y4 [Source:HGNC Symbol;Acc:HGNC:9329]                                                       | 11  | 3.75 | 0.7913 | 4.7 | 2.1E-06 | 7.8E-06 |
| ENSG00000237004 | ZNRF2P1         | zinc and ring finger 2 pseudogene 1 [Source:HGNC Symbol;Acc:HGNC:42792]                                             | 102 | 0.94 | 0.1973 | 4.7 | 2.1E-06 | 7.7E-06 |
| ENSG00000247828 | TMEM161B        | TMEM161B antisense RNA 1 [Source:HGNC Symbol;Acc:HGNC:43839]                                                        | 320 | 0.50 | 0.1054 | 4.7 | 2.1E-06 | 7.7E-06 |
| ENSG00000170100 | ZNF778          | zinc finger protein 778 [Source:HGNC Symbol;Acc:HGNC:26479]                                                         | 321 | 0.50 | 0.1053 | 4.8 | 2.0E-06 | 7.5E-06 |
| ENSG00000123388 | HOXC11          | homeobox C11 [Source:HGNC Symbol;Acc:HGNC:5123]                                                                     | 63  | 1.15 | 0.2414 | 4.8 | 2.0E-06 | 7.5E-06 |
| ENSG00000197479 | PCDH11          | protocadherin beta 11 [Source:HGNC Symbol;Acc:HGNC:8682]                                                            | 15  | 2.93 | 0.6153 | 4.8 | 2.0E-06 | 7.4E-06 |
| ENSG00000186153 | WWOX            | WW domain containing oxidoreductase [Source:HGNC Symbol;Acc:HGNC:12799]                                             | 217 | 0.59 | 0.1244 | 4.8 | 1.8E-06 | 6.7E-06 |
| ENSG00000184988 | TMEM106A        | transmembrane protein 106A [Source:HGNC Symbol;Acc:HGNC:28288]                                                      | 23  | 2.00 | 0.4184 | 4.8 | 1.8E-06 | 6.7E-06 |
| ENSG00000101049 | SGK2            | serum/glucocorticoid regulated kinase 2 [Source:HGNC Symbol;Acc:HGNC:13900]                                         | 13  | 3.07 | 0.6431 | 4.8 | 1.8E-06 | 6.6E-06 |
| ENSG00000170088 | TMEM192         | transmembrane protein 192 [Source:HGNC Symbol;Acc:HGNC:26775]                                                       | 259 | 0.57 | 0.1185 | 4.8 | 1.7E-06 | 6.5E-06 |
| ENSG00000169857 | AVEN            | apoptosis and caspase activation inhibitor [Source:HGNC Symbol;Acc:HGNC:13509]                                      | 219 | 0.66 | 0.1374 | 4.8 | 1.7E-06 | 6.5E-06 |
| ENSG00000255443 | CD44-AS1        | CD44 antisense RNA 1 [Source:HGNC Symbol;Acc:HGNC:40133]                                                            | 11  | 4.54 | 0.9488 | 4.8 | 1.7E-06 | 6.5E-06 |
| ENSG00000260853 | ENSG00000260853 | novel transcript, antisense to NFATC2IP                                                                             | 94  | 0.91 | 0.1895 | 4.8 | 1.6E-06 | 6.1E-06 |
| ENSG00000214595 | EML6            | EMAP like 6 [Source:HGNC Symbol;Acc:HGNC:35412]                                                                     | 55  | 1.25 | 0.2608 | 4.8 | 1.6E-06 | 6.0E-06 |
| ENSG00000169660 | HEXD            | hexosaminidase D [Source:HGNC Symbol;Acc:HGNC:26307]                                                                | 209 | 0.61 | 0.1269 | 4.8 | 1.6E-06 | 6.0E-06 |
| ENSG00000125170 | DOK4            | docking protein 4 [Source:HGNC Symbol;Acc:HGNC:19868]                                                               | 217 | 0.61 | 0.1265 | 4.8 | 1.6E-06 | 5.9E-06 |
| ENSG00000170629 | DPY19L2P2       | DPY19L2 pseudogene 2 [Source:HGNC Symbol;Acc:HGNC:21764]                                                            | 70  | 1.14 | 0.2373 | 4.8 | 1.6E-06 | 5.9E-06 |
| ENSG00000185420 | SMYD3           | SET and MYND domain containing 3 [Source:HGNC Symbol;Acc:HGNC:15513]                                                | 290 | 0.53 | 0.1094 | 4.8 | 1.6E-06 | 5.9E-06 |
| ENSG00000225968 | ELFN1           | extracellular leucine rich repeat and fibronectin type III domain containing 1 [Source:HGNC Symbol;Acc:HGNC:225968] | 48  | 1.34 | 0.2793 | 4.8 | 1.5E-06 | 5.8E-06 |
| ENSG00000169122 | FAM110B         | family with sequence similarity 110 member B [Source:HGNC Symbol;Acc:HGNC:28587]                                    | 260 | 0.55 | 0.1149 | 4.8 | 1.5E-06 | 5.8E-06 |
| ENSG00000176024 | ZNF613          | zinc finger protein 613 [Source:HGNC Symbol;Acc:HGNC:25827]                                                         | 188 | 0.66 | 0.1365 | 4.8 | 1.4E-06 | 5.2E-06 |
| ENSG00000233608 | TWIST2          | twist family bHLH transcription factor 2 [Source:HGNC Symbol;Acc:HGNC:20670]                                        | 14  | 2.90 | 0.5999 | 4.8 | 1.3E-06 | 5.0E-06 |
| ENSG00000255150 | EID3            | EP300 interacting inhibitor of differentiation 3 [Source:HGNC Symbol;Acc:HGNC:32961]                                | 29  | 1.78 | 0.3672 | 4.8 | 1.3E-06 | 4.9E-06 |
| ENSG00000170085 | SIMC1           | SUMO interacting motifs containing 1 [Source:HGNC Symbol;Acc:HGNC:24779]                                            | 220 | 0.61 | 0.1257 | 4.9 | 1.2E-06 | 4.7E-06 |
| ENSG00000148444 | COMMD3          | COMM domain containing 3 [Source:HGNC Symbol;Acc:HGNC:23332]                                                        | 97  | 0.95 | 0.1947 | 4.9 | 1.2E-06 | 4.5E-06 |
| ENSG00000163637 | PRICKLE2        | prickle planar cell polarity protein 2 [Source:HGNC Symbol;Acc:HGNC:20340]                                          | 156 | 0.74 | 0.1527 | 4.9 | 1.2E-06 | 4.5E-06 |
| ENSG00000267060 | PTGES3L         | prostaglandin E synthase 3 like [Source:HGNC Symbol;Acc:HGNC:43943]                                                 | 17  | 2.54 | 0.5230 | 4.9 | 1.2E-06 | 4.5E-06 |
| ENSG00000228742 | LINC02577       | long intergenic non-protein coding RNA 2577 [Source:HGNC Symbol;Acc:HGNC:53749]                                     | 76  | 1.04 | 0.2132 | 4.9 | 1.1E-06 | 4.1E-06 |
| ENSG00000116678 | LEPR            | leptin receptor [Source:HGNC Symbol;Acc:HGNC:6554]                                                                  | 53  | 1.33 | 0.2722 | 4.9 | 1.1E-06 | 4.1E-06 |
| ENSG00000172345 | STARD5          | StAR related lipid transfer domain containing 5 [Source:HGNC Symbol;Acc:HGNC:18065]                                 | 53  | 1.27 | 0.2605 | 4.9 | 1.1E-06 | 4.0E-06 |
| ENSG00000134461 | ANKRD16         | ankyrin repeat domain 16 [Source:HGNC Symbol;Acc:HGNC:23471]                                                        | 110 | 0.89 | 0.1830 | 4.9 | 1.0E-06 | 4.0E-06 |
| ENSG00000245146 | MALINC1         | mitosis associated long intergenic non-coding RNA 1 [Source:HGNC Symbol;Acc:HGNC:49009]                             | 210 | 0.63 | 0.1299 | 4.9 | 1.0E-06 | 4.0E-06 |

|                 |            |                                                                                            |     |      |        |     |         |         |
|-----------------|------------|--------------------------------------------------------------------------------------------|-----|------|--------|-----|---------|---------|
| ENSG00000177943 | MAMDC4     | MAM domain containing 4 [Source:HGNC Symbol;Acc:HGNC:24083]                                | 98  | 0.92 | 0.1892 | 4.9 | 1.0E-06 | 3.9E-06 |
| ENSG00000163874 | ZC3H12A    | zinc finger CCCH-type containing 12A [Source:HGNC Symbol;Acc:HGNC:26259]                   | 313 | 0.54 | 0.1094 | 4.9 | 1.0E-06 | 3.8E-06 |
| ENSG00000128578 | STRIP2     | striatin interacting protein 2 [Source:HGNC Symbol;Acc:HGNC:22209]                         | 272 | 0.54 | 0.1109 | 4.9 | 9.9E-07 | 3.8E-06 |
| ENSG00000188868 | ZNF563     | zinc finger protein 563 [Source:HGNC Symbol;Acc:HGNC:30498]                                | 42  | 1.57 | 0.3209 | 4.9 | 9.9E-07 | 3.8E-06 |
| ENSG00000108474 | PIGL       | phosphatidylinositol glycan anchor biosynthesis class L [Source:HGNC Symbol;Acc:HGNC:8966] | 295 | 0.62 | 0.1276 | 4.9 | 9.7E-07 | 3.7E-06 |
| ENSG00000129911 | KLF16      | Kruppel like factor 16 [Source:HGNC Symbol;Acc:HGNC:16857]                                 | 287 | 0.58 | 0.1186 | 4.9 | 9.4E-07 | 3.6E-06 |
| ENSG00000139625 | MAP3K12    | mitogen-activated protein kinase kinase kinase 12 [Source:HGNC Symbol;Acc:HGNC:6851]       | 165 | 0.71 | 0.1439 | 4.9 | 8.6E-07 | 3.3E-06 |
| ENSG00000119509 | INVS       | inversin [Source:HGNC Symbol;Acc:HGNC:17870]                                               | 325 | 0.53 | 0.1083 | 4.9 | 8.3E-07 | 3.2E-06 |
| ENSG00000267886 | ENSG000002 | novel transcript                                                                           | 24  | 2.30 | 0.4662 | 4.9 | 8.3E-07 | 3.2E-06 |
| ENSG00000127561 | SYNGR3     | synaptogyrin 3 [Source:HGNC Symbol;Acc:HGNC:11501]                                         | 82  | 1.19 | 0.2406 | 4.9 | 8.2E-07 | 3.2E-06 |
| ENSG00000155265 | GOLGA7B    | golgin A7 family member B [Source:HGNC Symbol;Acc:HGNC:31668]                              | 47  | 1.45 | 0.2948 | 4.9 | 8.0E-07 | 3.1E-06 |
| ENSG00000196220 | SRGAP3     | SLIT-ROBO Rho GTPase activating protein 3 [Source:HGNC Symbol;Acc:HGNC:19744]              | 46  | 1.40 | 0.2842 | 4.9 | 8.0E-07 | 3.1E-06 |
| ENSG00000229358 | DPY19L1P1  | DPY19L1 pseudogene 1 [Source:HGNC Symbol;Acc:HGNC:22395]                                   | 58  | 1.21 | 0.2457 | 4.9 | 7.9E-07 | 3.0E-06 |
| ENSG00000133794 | ARNTL      | aryl hydrocarbon receptor nuclear translocator like [Source:HGNC Symbol;Acc:HGNC:701]      | 154 | 0.75 | 0.1520 | 4.9 | 7.8E-07 | 3.0E-06 |
| ENSG00000107736 | CDH23      | cadherin related 23 [Source:HGNC Symbol;Acc:HGNC:13733]                                    | 150 | 0.75 | 0.1522 | 5.0 | 7.3E-07 | 2.8E-06 |
| ENSG00000159788 | RGS12      | regulator of G protein signaling 12 [Source:HGNC Symbol;Acc:HGNC:9994]                     | 227 | 0.62 | 0.1245 | 5.0 | 7.0E-07 | 2.7E-06 |
| ENSG00000273445 | ENSG000002 | novel transcript                                                                           | 13  | 6.24 | 1.2556 | 5.0 | 6.6E-07 | 2.6E-06 |
| ENSG00000150967 | ABCB9      | ATP binding cassette subfamily B member 9 [Source:HGNC Symbol;Acc:HGNC:50]                 | 299 | 0.56 | 0.1117 | 5.0 | 6.1E-07 | 2.4E-06 |
| ENSG00000188277 | C15orf62   | chromosome 15 open reading frame 62 [Source:HGNC Symbol;Acc:HGNC:34489]                    | 50  | 1.37 | 0.2728 | 5.0 | 5.5E-07 | 2.2E-06 |
| ENSG00000152464 | RPP38      | ribonuclease P/MRP subunit p38 [Source:HGNC Symbol;Acc:HGNC:30329]                         | 116 | 0.93 | 0.1859 | 5.0 | 5.4E-07 | 2.1E-06 |
| ENSG00000196236 | XPNPEP3    | X-prolyl aminopeptidase 3 [Source:HGNC Symbol;Acc:HGNC:28052]                              | 307 | 0.53 | 0.1053 | 5.0 | 5.2E-07 | 2.1E-06 |
| ENSG00000213799 | ZNF845     | zinc finger protein 845 [Source:HGNC Symbol;Acc:HGNC:25112]                                | 335 | 0.53 | 0.1051 | 5.0 | 5.2E-07 | 2.0E-06 |
| ENSG00000133424 | LARGE1     | LARGE xylosyl- and glucuronyltransferase 1 [Source:HGNC Symbol;Acc:HGNC:6511]              | 59  | 1.22 | 0.2427 | 5.0 | 5.0E-07 | 2.0E-06 |
| ENSG00000072195 | SPEG       | striated muscle enriched protein kinase [Source:HGNC Symbol;Acc:HGNC:16901]                | 170 | 0.73 | 0.1459 | 5.0 | 4.9E-07 | 1.9E-06 |
| ENSG00000174899 | SLC66A1L   | solute carrier family 66 member 1 like [Source:HGNC Symbol;Acc:HGNC:25146]                 | 64  | 1.17 | 0.2315 | 5.0 | 4.8E-07 | 1.9E-06 |
| ENSG00000102878 | HSF4       | heat shock transcription factor 4 [Source:HGNC Symbol;Acc:HGNC:5227]                       | 142 | 0.77 | 0.1539 | 5.0 | 4.8E-07 | 1.9E-06 |
| ENSG00000152457 | DCLRE1C    | DNA cross-link repair 1C [Source:HGNC Symbol;Acc:HGNC:17642]                               | 232 | 0.63 | 0.1242 | 5.0 | 4.5E-07 | 1.8E-06 |
| ENSG00000168062 | BATF2      | basic leucine zipper ATF-like transcription factor 2 [Source:HGNC Symbol;Acc:HGNC:25163]   | 169 | 0.73 | 0.1436 | 5.1 | 4.4E-07 | 1.7E-06 |
| ENSG00000079308 | TNS1       | tensin 1 [Source:HGNC Symbol;Acc:HGNC:11973]                                               | 158 | 0.75 | 0.1483 | 5.1 | 4.0E-07 | 1.6E-06 |
| ENSG00000205456 | TP53TG3D   | TP53 target 3D [Source:HGNC Symbol;Acc:HGNC:44657]                                         | 16  | 2.97 | 0.5865 | 5.1 | 4.0E-07 | 1.6E-06 |
| ENSG00000267147 | LINC01842  | long intergenic non-protein coding RNA 1842 [Source:HGNC Symbol;Acc:HGNC:52656]            | 57  | 1.26 | 0.2475 | 5.1 | 3.9E-07 | 1.6E-06 |
| ENSG00000249740 | OSMR-AS1   | OSMR antisense RNA 1 (head to head) [Source:HGNC Symbol;Acc:HGNC:50296]                    | 53  | 1.36 | 0.2687 | 5.1 | 3.9E-07 | 1.5E-06 |
| ENSG00000213866 | YBX1P10    | Y-box binding protein 1 pseudogene 10 [Source:HGNC Symbol;Acc:HGNC:42432]                  | 234 | 0.61 | 0.1192 | 5.1 | 3.8E-07 | 1.5E-06 |
| ENSG00000228544 | CCDC183-AS | CCDC183 antisense RNA 1 [Source:HGNC Symbol;Acc:HGNC:44105]                                | 67  | 1.20 | 0.2368 | 5.1 | 3.7E-07 | 1.5E-06 |
| ENSG00000197646 | PDCD1LG2   | programmed cell death 1 ligand 2 [Source:HGNC Symbol;Acc:HGNC:18731]                       | 67  | 1.18 | 0.2323 | 5.1 | 3.6E-07 | 1.4E-06 |
| ENSG00000242992 | FTH1P4     | ferritin heavy chain 1 pseudogene 4 [Source:HGNC Symbol;Acc:HGNC:3991]                     | 127 | 0.84 | 0.1654 | 5.1 | 3.5E-07 | 1.4E-06 |
| ENSG00000128203 | ASPHD2     | aspartate beta-hydroxylase domain containing 2 [Source:HGNC Symbol;Acc:HGNC:30437]         | 88  | 1.00 | 0.1960 | 5.1 | 3.5E-07 | 1.4E-06 |
| NA              | 14         | NA                                                                                         | 148 | 0.88 | 0.1731 | 5.1 | 3.3E-07 | 1.3E-06 |
| ENSG00000160781 | PAQR6      | progesterone and adipoQ receptor family member 6 [Source:HGNC Symbol;Acc:HGNC:30132]       | 208 | 0.66 | 0.1300 | 5.1 | 3.3E-07 | 1.3E-06 |
| ENSG00000142235 | LMTK3      | lemur tyrosine kinase 3 [Source:HGNC Symbol;Acc:HGNC:19295]                                | 212 | 0.66 | 0.1287 | 5.1 | 3.1E-07 | 1.2E-06 |
| ENSG00000180035 | ZNF48      | zinc finger protein 48 [Source:HGNC Symbol;Acc:HGNC:13114]                                 | 191 | 0.69 | 0.1342 | 5.1 | 3.1E-07 | 1.2E-06 |
| ENSG00000261189 | ENSG000002 | novel transcript, antisense to DSP                                                         | 166 | 0.75 | 0.1468 | 5.1 | 3.0E-07 | 1.2E-06 |

|                 |            |                                                                                                 |     |      |        |     |         |         |
|-----------------|------------|-------------------------------------------------------------------------------------------------|-----|------|--------|-----|---------|---------|
| ENSG00000286162 | ENSG000002 | novel transcript                                                                                | 95  | 1.06 | 0.2063 | 5.1 | 3.0E-07 | 1.2E-06 |
| ENSG00000197050 | ZNF420     | zinc finger protein 420 [Source:HGNC Symbol;Acc:HGNC:20649]                                     | 92  | 1.00 | 0.1945 | 5.1 | 2.8E-07 | 1.1E-06 |
| ENSG00000171872 | KLF17      | Kruppel like factor 17 [Source:HGNC Symbol;Acc:HGNC:18830]                                      | 9   | 6.62 | 1.2883 | 5.1 | 2.8E-07 | 1.1E-06 |
| ENSG00000112852 | PCDHB2     | protocadherin beta 2 [Source:HGNC Symbol;Acc:HGNC:8687]                                         | 82  | 1.11 | 0.2156 | 5.1 | 2.8E-07 | 1.1E-06 |
| ENSG00000122707 | RECK       | reversion inducing cysteine rich protein with kazal motifs [Source:HGNC Symbol;Acc:HGNC:11345]  | 176 | 0.78 | 0.1519 | 5.1 | 2.6E-07 | 1.1E-06 |
| ENSG00000112139 | MDGA1      | MAM domain containing glycosylphosphatidylinositol anchor 1 [Source:HGNC Symbol;Acc:HGNC:19267] | 99  | 0.99 | 0.1918 | 5.2 | 2.6E-07 | 1.0E-06 |
| ENSG00000049192 | ADAMTS6    | ADAM metalloproteinase with thrombospondin type 1 motif 6 [Source:HGNC Symbol;Acc:HGNC:222]     | 21  | 2.48 | 0.4815 | 5.2 | 2.5E-07 | 1.0E-06 |
| ENSG00000272711 | HK2-DT     | HK2 divergent transcript [Source:HGNC Symbol;Acc:HGNC:55204]                                    | 173 | 0.72 | 0.1405 | 5.2 | 2.5E-07 | 1.0E-06 |
| ENSG00000251493 | FOXO1      | forkhead box D1 [Source:HGNC Symbol;Acc:HGNC:3802]                                              | 251 | 0.67 | 0.1299 | 5.2 | 2.5E-07 | 1.0E-06 |
| ENSG00000204956 | PCDHGA1    | protocadherin gamma subfamily A, 1 [Source:HGNC Symbol;Acc:HGNC:8696]                           | 32  | 1.84 | 0.3574 | 5.2 | 2.5E-07 | 1.0E-06 |
| ENSG00000155792 | DEPTOR     | DEP domain containing MTOR interacting protein [Source:HGNC Symbol;Acc:HGNC:22953]              | 23  | 2.26 | 0.4377 | 5.2 | 2.4E-07 | 9.6E-07 |
| ENSG00000144230 | GPR17      | G protein-coupled receptor 17 [Source:HGNC Symbol;Acc:HGNC:4471]                                | 34  | 1.75 | 0.3375 | 5.2 | 2.3E-07 | 9.4E-07 |
| ENSG00000269706 | ENSG000002 | neurotrophin 4 (NTF4) pseudogene                                                                | 17  | 2.89 | 0.5570 | 5.2 | 2.2E-07 | 8.9E-07 |
| ENSG00000262188 | LINC01978  | long intergenic non-protein coding RNA 1978 [Source:HGNC Symbol;Acc:HGNC:52806]                 | 9   | 6.73 | 1.2991 | 5.2 | 2.2E-07 | 8.9E-07 |
| ENSG00000233406 | ENSG000002 | ribosomal protein S2 (RPS2) pseudogene                                                          | 75  | 1.16 | 0.2227 | 5.2 | 2.1E-07 | 8.7E-07 |
| ENSG00000255521 | ENSG000002 | novel transcript                                                                                | 9   | 6.68 | 1.2876 | 5.2 | 2.1E-07 | 8.6E-07 |
| ENSG00000066230 | SLC9A3     | solute carrier family 9 member A3 [Source:HGNC Symbol;Acc:HGNC:11073]                           | 63  | 1.25 | 0.2404 | 5.2 | 2.1E-07 | 8.6E-07 |
| ENSG00000236404 | VLDR-AS1   | VLDR antisense RNA 1 [Source:HGNC Symbol;Acc:HGNC:49621]                                        | 116 | 0.91 | 0.1753 | 5.2 | 2.1E-07 | 8.5E-07 |
| ENSG00000214293 | APTR       | Alu-mediated CDKN1A/p21 transcriptional regulator [Source:HGNC Symbol;Acc:HGNC:44173]           | 164 | 0.77 | 0.1472 | 5.2 | 2.0E-07 | 8.2E-07 |
| ENSG00000184678 | H2BC21     | H2B clustered histone 21 [Source:HGNC Symbol;Acc:HGNC:4760]                                     | 219 | 0.65 | 0.1244 | 5.2 | 2.0E-07 | 8.0E-07 |
| ENSG00000072401 | UBE2D1     | ubiquitin conjugating enzyme E2 D1 [Source:HGNC Symbol;Acc:HGNC:12474]                          | 260 | 0.63 | 0.1205 | 5.2 | 1.9E-07 | 7.8E-07 |
| ENSG00000124615 | MOCS1      | molybdenum cofactor synthesis 1 [Source:HGNC Symbol;Acc:HGNC:7190]                              | 68  | 1.22 | 0.2334 | 5.2 | 1.9E-07 | 7.7E-07 |
| ENSG00000196247 | ZNF107     | zinc finger protein 107 [Source:HGNC Symbol;Acc:HGNC:12887]                                     | 193 | 0.72 | 0.1390 | 5.2 | 1.9E-07 | 7.7E-07 |
| ENSG00000115170 | ACVR1      | activin A receptor type 1 [Source:HGNC Symbol;Acc:HGNC:171]                                     | 315 | 0.54 | 0.1039 | 5.2 | 1.9E-07 | 7.6E-07 |
| ENSG00000197619 | ZNF615     | zinc finger protein 615 [Source:HGNC Symbol;Acc:HGNC:24740]                                     | 231 | 0.65 | 0.1238 | 5.2 | 1.8E-07 | 7.3E-07 |
| ENSG00000216285 | ENSG000002 | phosphoglycerate mutase 1 (brain) (PGAM1) pseudogene                                            | 88  | 1.05 | 0.2001 | 5.2 | 1.7E-07 | 7.1E-07 |
| ENSG00000132970 | WASF3      | WASP family member 3 [Source:HGNC Symbol;Acc:HGNC:12734]                                        | 70  | 1.22 | 0.2328 | 5.2 | 1.7E-07 | 6.9E-07 |
| ENSG00000153291 | SLC25A27   | solute carrier family 25 member 27 [Source:HGNC Symbol;Acc:HGNC:21065]                          | 70  | 1.19 | 0.2267 | 5.2 | 1.6E-07 | 6.6E-07 |
| ENSG00000166407 | LMO1       | LIM domain only 1 [Source:HGNC Symbol;Acc:HGNC:6641]                                            | 93  | 1.02 | 0.1940 | 5.2 | 1.6E-07 | 6.4E-07 |
| ENSG00000224715 | ENSG000002 | novel transcript                                                                                | 9   | 6.73 | 1.2816 | 5.2 | 1.5E-07 | 6.3E-07 |
| ENSG00000155592 | ZKSCAN2    | zinc finger with KRAB and SCAN domains 2 [Source:HGNC Symbol;Acc:HGNC:25677]                    | 151 | 0.81 | 0.1545 | 5.3 | 1.5E-07 | 6.3E-07 |
| ENSG00000196263 | ZNF471     | zinc finger protein 471 [Source:HGNC Symbol;Acc:HGNC:23226]                                     | 203 | 0.68 | 0.1300 | 5.3 | 1.4E-07 | 6.0E-07 |
| ENSG00000269190 | FBXO17     | F-box protein 17 [Source:HGNC Symbol;Acc:HGNC:18754]                                            | 100 | 1.15 | 0.2186 | 5.3 | 1.4E-07 | 6.0E-07 |
| ENSG00000283511 | ENSG000002 | novel pseudogene                                                                                | 24  | 2.21 | 0.4191 | 5.3 | 1.4E-07 | 5.8E-07 |
| ENSG00000127946 | HIP1       | huntingtin interacting protein 1 [Source:HGNC Symbol;Acc:HGNC:4913]                             | 282 | 0.60 | 0.1142 | 5.3 | 1.4E-07 | 5.7E-07 |
| ENSG00000198093 | ZNF649     | zinc finger protein 649 [Source:HGNC Symbol;Acc:HGNC:25741]                                     | 254 | 0.63 | 0.1189 | 5.3 | 1.4E-07 | 5.7E-07 |
| ENSG00000164647 | STEAP1     | STEAP family member 1 [Source:HGNC Symbol;Acc:HGNC:11378]                                       | 63  | 1.26 | 0.2392 | 5.3 | 1.4E-07 | 5.7E-07 |
| ENSG00000145743 | FBXL17     | F-box and leucine rich repeat protein 17 [Source:HGNC Symbol;Acc:HGNC:13615]                    | 272 | 0.62 | 0.1174 | 5.3 | 1.4E-07 | 5.7E-07 |
| ENSG00000229320 | KRT8P12    | keratin 8 pseudogene 12 [Source:HGNC Symbol;Acc:HGNC:28057]                                     | 175 | 0.77 | 0.1464 | 5.3 | 1.3E-07 | 5.5E-07 |
| ENSG00000181031 | RPH3AL     | rabphilin 3A like (without C2 domains) [Source:HGNC Symbol;Acc:HGNC:10296]                      | 17  | 2.90 | 0.5486 | 5.3 | 1.3E-07 | 5.5E-07 |
| ENSG00000258711 | ENSG000002 | novel transcript                                                                                | 125 | 0.94 | 0.1774 | 5.3 | 1.3E-07 | 5.2E-07 |
| ENSG00000227036 | LINC00511  | long intergenic non-protein coding RNA 511 [Source:HGNC Symbol;Acc:HGNC:43564]                  | 313 | 0.56 | 0.1063 | 5.3 | 1.3E-07 | 5.2E-07 |

|                 |                 |                                                                                               |     |      |        |     |         |         |
|-----------------|-----------------|-----------------------------------------------------------------------------------------------|-----|------|--------|-----|---------|---------|
| ENSG00000261115 | TMEM178B        | transmembrane protein 178B [Source:HGNC Symbol;Acc:HGNC:44112]                                | 304 | 0.58 | 0.1098 | 5.3 | 1.2E-07 | 5.2E-07 |
| ENSG00000121406 | ZNF549          | zinc finger protein 549 [Source:HGNC Symbol;Acc:HGNC:26632]                                   | 369 | 0.51 | 0.0967 | 5.3 | 1.1E-07 | 4.8E-07 |
| ENSG00000146112 | PPP1R18         | protein phosphatase 1 regulatory subunit 18 [Source:HGNC Symbol;Acc:HGNC:29413]               | 169 | 0.81 | 0.1535 | 5.3 | 1.1E-07 | 4.8E-07 |
| ENSG00000277496 | ENSG00000277496 | novel transcript, antisense to SLC04A1                                                        | 40  | 1.64 | 0.3093 | 5.3 | 1.1E-07 | 4.6E-07 |
| ENSG00000186204 | CYP4F12         | cytochrome P450 family 4 subfamily F member 12 [Source:HGNC Symbol;Acc:HGNC:18857]            | 278 | 0.58 | 0.1096 | 5.3 | 1.0E-07 | 4.3E-07 |
| ENSG00000146054 | TRIM7           | tripartite motif containing 7 [Source:HGNC Symbol;Acc:HGNC:16278]                             | 265 | 0.68 | 0.1269 | 5.3 | 1.0E-07 | 4.2E-07 |
| ENSG00000169740 | ZNF32           | zinc finger protein 32 [Source:HGNC Symbol;Acc:HGNC:13095]                                    | 91  | 1.07 | 0.2002 | 5.3 | 9.8E-08 | 4.1E-07 |
| ENSG00000205220 | PSMB10          | proteasome 20S subunit beta 10 [Source:HGNC Symbol;Acc:HGNC:9538]                             | 295 | 0.62 | 0.1157 | 5.3 | 9.0E-08 | 3.8E-07 |
| ENSG00000196172 | ZNF681          | zinc finger protein 681 [Source:HGNC Symbol;Acc:HGNC:26457]                                   | 70  | 1.28 | 0.2398 | 5.3 | 9.0E-08 | 3.8E-07 |
| ENSG00000155099 | PIP4P2          | phosphatidylinositol-4,5-bisphosphate 4-phosphatase 2 [Source:HGNC Symbol;Acc:HGNC:25452]     | 88  | 1.06 | 0.1986 | 5.3 | 9.0E-08 | 3.8E-07 |
| ENSG00000165630 | PRPF18          | pre-mRNA processing factor 18 [Source:HGNC Symbol;Acc:HGNC:17351]                             | 109 | 0.99 | 0.1846 | 5.4 | 8.8E-08 | 3.7E-07 |
| ENSG00000215712 | TMEM242         | transmembrane protein 242 [Source:HGNC Symbol;Acc:HGNC:17206]                                 | 190 | 0.76 | 0.1416 | 5.4 | 8.6E-08 | 3.6E-07 |
| ENSG00000181007 | ZFP82           | ZFP82 zinc finger protein [Source:HGNC Symbol;Acc:HGNC:28682]                                 | 177 | 0.76 | 0.1420 | 5.4 | 8.6E-08 | 3.6E-07 |
| ENSG00000189190 | ZNF600          | zinc finger protein 600 [Source:HGNC Symbol;Acc:HGNC:30951]                                   | 391 | 0.51 | 0.0957 | 5.4 | 8.6E-08 | 3.6E-07 |
| ENSG00000147697 | GSDMC           | gasdermin C [Source:HGNC Symbol;Acc:HGNC:7151]                                                | 154 | 0.86 | 0.1610 | 5.4 | 8.2E-08 | 3.5E-07 |
| ENSG00000133195 | SLC39A11        | solute carrier family 39 member 11 [Source:HGNC Symbol;Acc:HGNC:14463]                        | 300 | 0.58 | 0.1079 | 5.4 | 8.2E-08 | 3.5E-07 |
| ENSG00000230836 | LINC01293       | long intergenic non-protein coding RNA 1293 [Source:HGNC Symbol;Acc:HGNC:50362]               | 36  | 1.74 | 0.3244 | 5.4 | 8.0E-08 | 3.4E-07 |
| ENSG00000181619 | GPR135          | G protein-coupled receptor 135 [Source:HGNC Symbol;Acc:HGNC:19991]                            | 61  | 1.28 | 0.2384 | 5.4 | 7.7E-08 | 3.3E-07 |
| ENSG00000169951 | ZNF764          | zinc finger protein 764 [Source:HGNC Symbol;Acc:HGNC:28200]                                   | 150 | 0.81 | 0.1514 | 5.4 | 7.6E-08 | 3.2E-07 |
| ENSG00000287784 | ENSG00000287784 | novel transcript, antisense to C3orf56                                                        | 10  | 6.87 | 1.2779 | 5.4 | 7.5E-08 | 3.2E-07 |
| ENSG00000100360 | IFT27           | intraflagellar transport 27 [Source:HGNC Symbol;Acc:HGNC:18626]                               | 287 | 0.59 | 0.1097 | 5.4 | 7.3E-08 | 3.1E-07 |
| ENSG00000225614 | ZNF469          | zinc finger protein 469 [Source:HGNC Symbol;Acc:HGNC:23216]                                   | 43  | 1.62 | 0.3003 | 5.4 | 7.3E-08 | 3.1E-07 |
| ENSG00000273706 | LHX1            | LIM homeobox 1 [Source:HGNC Symbol;Acc:HGNC:6593]                                             | 19  | 2.80 | 0.5190 | 5.4 | 7.1E-08 | 3.0E-07 |
| ENSG00000256087 | ZNF432          | zinc finger protein 432 [Source:HGNC Symbol;Acc:HGNC:20810]                                   | 227 | 0.65 | 0.1209 | 5.4 | 6.9E-08 | 2.9E-07 |
| ENSG00000106100 | NOD1            | nucleotide binding oligomerization domain containing 1 [Source:HGNC Symbol;Acc:HGNC:16390]    | 324 | 0.55 | 0.1019 | 5.4 | 6.9E-08 | 2.9E-07 |
| ENSG00000184058 | TBX1            | T-box transcription factor 1 [Source:HGNC Symbol;Acc:HGNC:11592]                              | 52  | 1.47 | 0.2717 | 5.4 | 6.5E-08 | 2.8E-07 |
| ENSG00000104361 | NIPAL2          | NIPA like domain containing 2 [Source:HGNC Symbol;Acc:HGNC:25854]                             | 424 | 0.53 | 0.0978 | 5.4 | 6.1E-08 | 2.6E-07 |
| ENSG00000158406 | H4C8            | H4 clustered histone 8 [Source:HGNC Symbol;Acc:HGNC:4788]                                     | 127 | 0.88 | 0.1631 | 5.4 | 6.0E-08 | 2.6E-07 |
| ENSG00000119661 | DNAL1           | dynein axonemal light chain 1 [Source:HGNC Symbol;Acc:HGNC:23247]                             | 325 | 0.56 | 0.1025 | 5.4 | 5.7E-08 | 2.4E-07 |
| ENSG00000159263 | SIM2            | SIM bHLH transcription factor 2 [Source:HGNC Symbol;Acc:HGNC:10883]                           | 170 | 0.76 | 0.1398 | 5.4 | 5.1E-08 | 2.2E-07 |
| ENSG00000178764 | ZHX2            | zinc fingers and homeoboxes 2 [Source:HGNC Symbol;Acc:HGNC:18513]                             | 150 | 0.92 | 0.1681 | 5.4 | 5.1E-08 | 2.2E-07 |
| ENSG00000113319 | RASGRF2         | Ras protein specific guanine nucleotide releasing factor 2 [Source:HGNC Symbol;Acc:HGNC:9876] | 61  | 1.30 | 0.2386 | 5.5 | 4.9E-08 | 2.1E-07 |
| ENSG00000203814 | H2BC18          | H2B clustered histone 18 [Source:HGNC Symbol;Acc:HGNC:24700]                                  | 63  | 1.29 | 0.2372 | 5.5 | 4.8E-08 | 2.1E-07 |
| ENSG00000149922 | TBX6            | T-box transcription factor 6 [Source:HGNC Symbol;Acc:HGNC:11605]                              | 32  | 1.95 | 0.3574 | 5.5 | 4.8E-08 | 2.1E-07 |
| ENSG00000185869 | ZNF829          | zinc finger protein 829 [Source:HGNC Symbol;Acc:HGNC:34032]                                   | 160 | 0.80 | 0.1466 | 5.5 | 4.5E-08 | 1.9E-07 |
| ENSG00000250486 | FAM218A         | family with sequence similarity 218 member A [Source:HGNC Symbol;Acc:HGNC:26466]              | 26  | 2.24 | 0.4096 | 5.5 | 4.5E-08 | 1.9E-07 |
| ENSG00000130830 | MPP1            | membrane palmitoylated protein 1 [Source:HGNC Symbol;Acc:HGNC:7219]                           | 185 | 0.75 | 0.1370 | 5.5 | 4.4E-08 | 1.9E-07 |
| ENSG00000111647 | UHRF1BP1L       | UHRF1 binding protein 1 like [Source:HGNC Symbol;Acc:HGNC:29102]                              | 354 | 0.55 | 0.1001 | 5.5 | 3.9E-08 | 1.7E-07 |
| ENSG00000120093 | HOXB3           | homeobox B3 [Source:HGNC Symbol;Acc:HGNC:5114]                                                | 196 | 0.74 | 0.1354 | 5.5 | 3.9E-08 | 1.7E-07 |
| ENSG00000105717 | PBX4            | PBX homeobox 4 [Source:HGNC Symbol;Acc:HGNC:13403]                                            | 193 | 0.75 | 0.1359 | 5.5 | 3.8E-08 | 1.6E-07 |
| ENSG00000287331 | ENSG00000287331 | novel transcript                                                                              | 16  | 5.06 | 0.9191 | 5.5 | 3.7E-08 | 1.6E-07 |
| ENSG00000287222 | ENSG00000287222 | novel transcript, antisense to PUF60                                                          | 186 | 0.75 | 0.1356 | 5.5 | 3.7E-08 | 1.6E-07 |

|                 |                 |                                                                                                   |     |      |        |     |         |         |
|-----------------|-----------------|---------------------------------------------------------------------------------------------------|-----|------|--------|-----|---------|---------|
| ENSG00000156510 | HKDC1           | hexokinase domain containing 1 [Source:HGNC Symbol;Acc:HGNC:23302]                                | 84  | 1.13 | 0.2050 | 5.5 | 3.1E-08 | 1.4E-07 |
| ENSG00000050555 | LAMC3           | laminin subunit gamma 3 [Source:HGNC Symbol;Acc:HGNC:6494]                                        | 42  | 1.66 | 0.2990 | 5.6 | 2.8E-08 | 1.2E-07 |
| ENSG00000139725 | RHOF            | ras homolog family member F, filopodia associated [Source:HGNC Symbol;Acc:HGNC:15703]             | 210 | 0.74 | 0.1337 | 5.6 | 2.7E-08 | 1.2E-07 |
| ENSG00000213015 | ZNF580          | zinc finger protein 580 [Source:HGNC Symbol;Acc:HGNC:29473]                                       | 338 | 0.59 | 0.1054 | 5.6 | 2.7E-08 | 1.2E-07 |
| ENSG00000133863 | TEX15           | testis expressed 15, meiosis and synapsis associated [Source:HGNC Symbol;Acc:HGNC:11738]          | 132 | 0.91 | 0.1634 | 5.6 | 2.7E-08 | 1.2E-07 |
| ENSG00000135766 | EGLN1           | egl-9 family hypoxia inducible factor 1 [Source:HGNC Symbol;Acc:HGNC:1232]                        | 167 | 0.91 | 0.1640 | 5.6 | 2.5E-08 | 1.1E-07 |
| ENSG00000130829 | DUSP9           | dual specificity phosphatase 9 [Source:HGNC Symbol;Acc:HGNC:3076]                                 | 51  | 1.50 | 0.2696 | 5.6 | 2.4E-08 | 1.1E-07 |
| ENSG00000113356 | POLR3G          | RNA polymerase III subunit G [Source:HGNC Symbol;Acc:HGNC:30075]                                  | 307 | 0.59 | 0.1049 | 5.6 | 2.4E-08 | 1.1E-07 |
| ENSG00000103343 | ZNF174          | zinc finger protein 174 [Source:HGNC Symbol;Acc:HGNC:12963]                                       | 130 | 0.99 | 0.1769 | 5.6 | 2.4E-08 | 1.0E-07 |
| ENSG00000205609 | EIF3CL          | eukaryotic translation initiation factor 3 subunit C like [Source:HGNC Symbol;Acc:HGNC:26347]     | 177 | 0.80 | 0.1433 | 5.6 | 2.2E-08 | 9.9E-08 |
| ENSG00000103489 | XYLT1           | xylosyltransferase 1 [Source:HGNC Symbol;Acc:HGNC:15516]                                          | 190 | 0.74 | 0.1327 | 5.6 | 2.1E-08 | 9.4E-08 |
| ENSG00000130962 | PRRG1           | proline rich and Gla domain 1 [Source:HGNC Symbol;Acc:HGNC:9469]                                  | 341 | 0.57 | 0.1010 | 5.6 | 2.1E-08 | 9.3E-08 |
| ENSG00000081818 | PCDH4           | protocadherin beta 4 [Source:HGNC Symbol;Acc:HGNC:8689]                                           | 18  | 3.08 | 0.5497 | 5.6 | 2.1E-08 | 9.2E-08 |
| ENSG00000206190 | ATP10A          | ATPase phospholipid transporting 10A (putative) [Source:HGNC Symbol;Acc:HGNC:13542]               | 246 | 0.69 | 0.1224 | 5.6 | 2.1E-08 | 9.2E-08 |
| ENSG00000126603 | GLIS2           | GLIS family zinc finger 2 [Source:HGNC Symbol;Acc:HGNC:29450]                                     | 105 | 1.04 | 0.1852 | 5.6 | 2.0E-08 | 8.8E-08 |
| ENSG00000249102 | ENSG00000249102 | novel transcript                                                                                  | 12  | 7.07 | 1.2602 | 5.6 | 2.0E-08 | 8.8E-08 |
| ENSG00000221821 | C6orf226        | chromosome 6 open reading frame 226 [Source:HGNC Symbol;Acc:HGNC:34431]                           | 161 | 0.83 | 0.1480 | 5.6 | 2.0E-08 | 8.8E-08 |
| ENSG00000265763 | ZNF488          | zinc finger protein 488 [Source:HGNC Symbol;Acc:HGNC:23535]                                       | 240 | 0.70 | 0.1241 | 5.6 | 2.0E-08 | 8.8E-08 |
| ENSG00000279249 | ENSG00000279249 | novel transcript, antisense to CBLN1                                                              | 47  | 1.57 | 0.2797 | 5.6 | 1.9E-08 | 8.7E-08 |
| ENSG00000226608 | FTLP3           | ferritin light chain pseudogene 3 [Source:HGNC Symbol;Acc:HGNC:4000]                              | 126 | 0.94 | 0.1673 | 5.6 | 1.9E-08 | 8.5E-08 |
| ENSG00000272767 | JMJD1C-AS1      | JMJD1C antisense RNA 1 [Source:HGNC Symbol;Acc:HGNC:28222]                                        | 40  | 1.80 | 0.3190 | 5.6 | 1.8E-08 | 7.9E-08 |
| ENSG00000197208 | SLC22A4         | solute carrier family 22 member 4 [Source:HGNC Symbol;Acc:HGNC:10968]                             | 74  | 1.30 | 0.2315 | 5.6 | 1.7E-08 | 7.7E-08 |
| ENSG00000103199 | ZNF500          | zinc finger protein 500 [Source:HGNC Symbol;Acc:HGNC:23716]                                       | 191 | 0.77 | 0.1360 | 5.6 | 1.7E-08 | 7.7E-08 |
| ENSG00000122008 | POLK            | DNA polymerase kappa [Source:HGNC Symbol;Acc:HGNC:9183]                                           | 210 | 0.73 | 0.1290 | 5.6 | 1.7E-08 | 7.6E-08 |
| ENSG00000170684 | ZNF296          | zinc finger protein 296 [Source:HGNC Symbol;Acc:HGNC:15981]                                       | 196 | 0.74 | 0.1302 | 5.6 | 1.6E-08 | 7.3E-08 |
| ENSG00000095752 | IL11            | interleukin 11 [Source:HGNC Symbol;Acc:HGNC:5966]                                                 | 111 | 1.12 | 0.1975 | 5.6 | 1.6E-08 | 7.3E-08 |
| ENSG00000176597 | B3GNT5          | UDP-GlcNAc:betaGal beta-1,3-N-acetylglucosaminyltransferase 5 [Source:HGNC Symbol;Acc:HGNC:15648] | 395 | 0.54 | 0.0948 | 5.6 | 1.6E-08 | 7.2E-08 |
| ENSG00000248383 | PCDHAC1         | protocadherin alpha subfamily C, 1 [Source:HGNC Symbol;Acc:HGNC:8676]                             | 101 | 1.13 | 0.2002 | 5.7 | 1.5E-08 | 6.9E-08 |
| ENSG00000199568 | RNU5A-1         | RNA, USA small nuclear 1 [Source:HGNC Symbol;Acc:HGNC:10211]                                      | 43  | 1.88 | 0.3326 | 5.7 | 1.5E-08 | 6.8E-08 |
| ENSG00000185070 | FLRT2           | fibronectin leucine rich transmembrane protein 2 [Source:HGNC Symbol;Acc:HGNC:3761]               | 389 | 0.57 | 0.1011 | 5.7 | 1.4E-08 | 6.4E-08 |
| ENSG00000144908 | ALDH1L1         | aldehyde dehydrogenase 1 family member L1 [Source:HGNC Symbol;Acc:HGNC:3978]                      | 35  | 2.02 | 0.3555 | 5.7 | 1.3E-08 | 6.0E-08 |
| ENSG00000223784 | LINP1           | lncRNA in non-homologous end joining pathway 1 [Source:HGNC Symbol;Acc:HGNC:53170]                | 78  | 1.25 | 0.2209 | 5.7 | 1.3E-08 | 6.0E-08 |
| ENSG00000125458 | NT5C            | 5', 3'-nucleotidase, cytosolic [Source:HGNC Symbol;Acc:HGNC:17144]                                | 183 | 0.78 | 0.1367 | 5.7 | 1.3E-08 | 5.8E-08 |
| ENSG00000143702 | CEP170          | centrosomal protein 170 [Source:HGNC Symbol;Acc:HGNC:28920]                                       | 184 | 0.78 | 0.1361 | 5.7 | 1.2E-08 | 5.3E-08 |
| ENSG00000260018 | ENSG00000260018 | novel transcript, antisense to MBTPS1                                                             | 36  | 1.93 | 0.3380 | 5.7 | 1.1E-08 | 5.2E-08 |
| ENSG00000186854 | TRABD2A         | TraB domain containing 2A [Source:HGNC Symbol;Acc:HGNC:27013]                                     | 45  | 1.67 | 0.2929 | 5.7 | 1.1E-08 | 5.1E-08 |
| ENSG00000228649 | SNHG26          | small nucleolar RNA host gene 26 [Source:HGNC Symbol;Acc:HGNC:53131]                              | 221 | 0.72 | 0.1262 | 5.7 | 1.1E-08 | 5.0E-08 |
| ENSG00000116774 | OLFML3          | olfactomedin like 3 [Source:HGNC Symbol;Acc:HGNC:24956]                                           | 43  | 1.77 | 0.3088 | 5.7 | 1.0E-08 | 4.6E-08 |
| ENSG00000205060 | SLC35B4         | solute carrier family 35 member B4 [Source:HGNC Symbol;Acc:HGNC:20584]                            | 220 | 0.71 | 0.1240 | 5.7 | 1.0E-08 | 4.5E-08 |
| ENSG00000188785 | ZNF548          | zinc finger protein 548 [Source:HGNC Symbol;Acc:HGNC:26561]                                       | 342 | 0.61 | 0.1068 | 5.7 | 9.6E-09 | 4.3E-08 |
| ENSG00000160221 | GATD3A          | glutamine amidotransferase like class 1 domain containing 3A [Source:HGNC Symbol;Acc:HGNC:1273]   | 489 | 0.51 | 0.0885 | 5.7 | 9.5E-09 | 4.3E-08 |
| ENSG00000277075 | H2AC8           | H2A clustered histone 8 [Source:HGNC Symbol;Acc:HGNC:4724]                                        | 85  | 1.17 | 0.2041 | 5.7 | 9.3E-09 | 4.2E-08 |

|                 |                 |                                                                                                |     |      |        |     |         |         |
|-----------------|-----------------|------------------------------------------------------------------------------------------------|-----|------|--------|-----|---------|---------|
| ENSG00000213988 | ZNF90           | zinc finger protein 90 [Source:HGNC Symbol;Acc:HGNC:13165]                                     | 49  | 1.64 | 0.2848 | 5.7 | 8.9E-09 | 4.1E-08 |
| ENSG00000198053 | SIRPA           | signal regulatory protein alpha [Source:HGNC Symbol;Acc:HGNC:9662]                             | 237 | 0.74 | 0.1289 | 5.8 | 8.3E-09 | 3.8E-08 |
| ENSG00000168917 | SLC35G2         | solute carrier family 35 member G2 [Source:HGNC Symbol;Acc:HGNC:28480]                         | 83  | 1.31 | 0.2277 | 5.8 | 8.1E-09 | 3.7E-08 |
| ENSG00000186687 | LYRM7           | LYR motif containing 7 [Source:HGNC Symbol;Acc:HGNC:28072]                                     | 461 | 0.53 | 0.0920 | 5.8 | 7.8E-09 | 3.6E-08 |
| ENSG00000113522 | RAD50           | RAD50 double strand break repair protein [Source:HGNC Symbol;Acc:HGNC:9816]                    | 137 | 1.03 | 0.1779 | 5.8 | 7.8E-09 | 3.6E-08 |
| ENSG00000198934 | MAGEE1          | MAGE family member E1 [Source:HGNC Symbol;Acc:HGNC:24934]                                      | 97  | 1.20 | 0.2084 | 5.8 | 7.7E-09 | 3.5E-08 |
| ENSG00000280832 | GSEC            | G-quadruplex forming sequence containing lncRNA [Source:HGNC Symbol;Acc:HGNC:48645]            | 131 | 1.02 | 0.1764 | 5.8 | 7.4E-09 | 3.4E-08 |
| ENSG00000218582 | GAPDHP63        | glyceraldehyde 3 phosphate dehydrogenase pseudogene 63 [Source:HGNC Symbol;Acc:HGNC:4157]      | 130 | 0.94 | 0.1618 | 5.8 | 7.3E-09 | 3.3E-08 |
| ENSG00000115392 | FANCL           | FA complementation group L [Source:HGNC Symbol;Acc:HGNC:20748]                                 | 448 | 0.51 | 0.0883 | 5.8 | 7.1E-09 | 3.2E-08 |
| ENSG00000225953 | SATB2-AS1       | SATB2 antisense RNA 1 [Source:HGNC Symbol;Acc:HGNC:26490]                                      | 41  | 1.84 | 0.3180 | 5.8 | 6.7E-09 | 3.1E-08 |
| ENSG00000130813 | SHFL            | shiftless antiviral inhibitor of ribosomal frameshifting [Source:HGNC Symbol;Acc:HGNC:25649]   | 401 | 0.56 | 0.0968 | 5.8 | 6.6E-09 | 3.1E-08 |
| ENSG00000070371 | CLTCL1          | clathrin heavy chain like 1 [Source:HGNC Symbol;Acc:HGNC:2093]                                 | 156 | 0.86 | 0.1489 | 5.8 | 6.5E-09 | 3.0E-08 |
| ENSG00000148848 | ADAM12          | ADAM metallopeptidase domain 12 [Source:HGNC Symbol;Acc:HGNC:190]                              | 31  | 2.14 | 0.3683 | 5.8 | 6.4E-09 | 2.9E-08 |
| ENSG00000141655 | TNFRSF11A       | TNF receptor superfamily member 11a [Source:HGNC Symbol;Acc:HGNC:11908]                        | 90  | 1.16 | 0.2004 | 5.8 | 6.3E-09 | 2.9E-08 |
| ENSG00000197562 | RAB40C          | RAB40C, member RAS oncogene family [Source:HGNC Symbol;Acc:HGNC:18285]                         | 426 | 0.55 | 0.0939 | 5.8 | 6.2E-09 | 2.9E-08 |
| ENSG00000064195 | DLX3            | distal-less homeobox 3 [Source:HGNC Symbol;Acc:HGNC:2916]                                      | 353 | 0.58 | 0.0993 | 5.8 | 5.8E-09 | 2.7E-08 |
| ENSG00000196581 | AJAP1           | adherens junctions associated protein 1 [Source:HGNC Symbol;Acc:HGNC:30801]                    | 344 | 0.60 | 0.1034 | 5.8 | 5.5E-09 | 2.5E-08 |
| ENSG00000128594 | LRRC4           | leucine rich repeat containing 4 [Source:HGNC Symbol;Acc:HGNC:15586]                           | 28  | 2.29 | 0.3927 | 5.8 | 5.5E-09 | 2.5E-08 |
| ENSG00000227051 | C14orf132       | chromosome 14 open reading frame 132 [Source:HGNC Symbol;Acc:HGNC:20346]                       | 62  | 1.46 | 0.2501 | 5.8 | 5.0E-09 | 2.3E-08 |
| ENSG00000111700 | SLCO1B3         | solute carrier organic anion transporter family member 1B3 [Source:HGNC Symbol;Acc:HGNC:10961] | 18  | 3.47 | 0.5931 | 5.9 | 4.9E-09 | 2.3E-08 |
| ENSG00000168297 | PXK             | PX domain containing serine/threonine kinase like [Source:HGNC Symbol;Acc:HGNC:23326]          | 191 | 0.79 | 0.1343 | 5.9 | 4.8E-09 | 2.2E-08 |
| ENSG00000138378 | STAT4           | signal transducer and activator of transcription 4 [Source:HGNC Symbol;Acc:HGNC:11365]         | 56  | 1.53 | 0.2611 | 5.9 | 4.7E-09 | 2.2E-08 |
| ENSG00000173542 | MOB1B           | MOB kinase activator 1B [Source:HGNC Symbol;Acc:HGNC:29801]                                    | 463 | 0.51 | 0.0878 | 5.9 | 4.6E-09 | 2.2E-08 |
| ENSG00000254842 | LINC02551       | long intergenic non-protein coding RNA 2551 [Source:HGNC Symbol;Acc:HGNC:53586]                | 89  | 1.20 | 0.2054 | 5.9 | 4.5E-09 | 2.1E-08 |
| ENSG00000179456 | ZBTB18          | zinc finger and BTB domain containing 18 [Source:HGNC Symbol;Acc:HGNC:13030]                   | 509 | 0.52 | 0.0881 | 5.9 | 4.4E-09 | 2.0E-08 |
| ENSG00000166920 | C15orf48        | chromosome 15 open reading frame 48 [Source:HGNC Symbol;Acc:HGNC:29898]                        | 327 | 0.65 | 0.1099 | 5.9 | 4.3E-09 | 2.0E-08 |
| ENSG00000137502 | RAB30           | RAB30, member RAS oncogene family [Source:HGNC Symbol;Acc:HGNC:9770]                           | 188 | 0.80 | 0.1356 | 5.9 | 3.7E-09 | 1.8E-08 |
| ENSG00000162004 | CCDC78          | coiled-coil domain containing 78 [Source:HGNC Symbol;Acc:HGNC:14153]                           | 50  | 1.68 | 0.2841 | 5.9 | 3.7E-09 | 1.7E-08 |
| ENSG00000233184 | ENSG00000233184 | novel transcript                                                                               | 61  | 1.43 | 0.2431 | 5.9 | 3.7E-09 | 1.7E-08 |
| ENSG00000213030 | CGB8            | chorionic gonadotropin subunit beta 8 [Source:HGNC Symbol;Acc:HGNC:16453]                      | 20  | 3.14 | 0.5309 | 5.9 | 3.5E-09 | 1.6E-08 |
| ENSG00000259341 | ENSG00000259341 | novel transcript                                                                               | 21  | 2.96 | 0.5011 | 5.9 | 3.4E-09 | 1.6E-08 |
| ENSG00000280604 | ENSG00000280604 | PCBP3 overlapping transcript 1                                                                 | 17  | 4.11 | 0.6952 | 5.9 | 3.4E-09 | 1.6E-08 |
| ENSG00000233328 | PFN1P1          | profilin 1 pseudogene 1 [Source:HGNC Symbol;Acc:HGNC:42989]                                    | 260 | 0.68 | 0.1144 | 5.9 | 3.3E-09 | 1.6E-08 |
| ENSG00000143469 | SYT14           | synaptotagmin 14 [Source:HGNC Symbol;Acc:HGNC:23143]                                           | 38  | 1.91 | 0.3224 | 5.9 | 3.3E-09 | 1.5E-08 |
| ENSG00000067113 | PLPP1           | phospholipid phosphatase 1 [Source:HGNC Symbol;Acc:HGNC:9228]                                  | 252 | 0.70 | 0.1180 | 5.9 | 3.2E-09 | 1.5E-08 |
| ENSG00000151917 | BEND6           | BEN domain containing 6 [Source:HGNC Symbol;Acc:HGNC:20871]                                    | 33  | 2.12 | 0.3577 | 5.9 | 3.0E-09 | 1.4E-08 |
| ENSG00000085999 | RAD54L          | RAD54 like [Source:HGNC Symbol;Acc:HGNC:9826]                                                  | 348 | 0.61 | 0.1020 | 5.9 | 2.8E-09 | 1.3E-08 |
| ENSG00000212719 | LINC02693       | long intergenic non-protein coding RNA 2693 [Source:HGNC Symbol;Acc:HGNC:27904]                | 249 | 0.71 | 0.1194 | 6.0 | 2.6E-09 | 1.2E-08 |
| ENSG00000204179 | PTPN20          | protein tyrosine phosphatase non-receptor type 20 [Source:HGNC Symbol;Acc:HGNC:23423]          | 165 | 0.88 | 0.1479 | 6.0 | 2.6E-09 | 1.2E-08 |
| ENSG00000167554 | ZNF610          | zinc finger protein 610 [Source:HGNC Symbol;Acc:HGNC:26687]                                    | 47  | 1.74 | 0.2923 | 6.0 | 2.5E-09 | 1.2E-08 |
| ENSG00000135740 | SLC9A5          | solute carrier family 9 member A5 [Source:HGNC Symbol;Acc:HGNC:11078]                          | 176 | 0.88 | 0.1471 | 6.0 | 2.5E-09 | 1.2E-08 |
| ENSG00000166669 | ATF7IP2         | activating transcription factor 7 interacting protein 2 [Source:HGNC Symbol;Acc:HGNC:20397]    | 184 | 0.87 | 0.1456 | 6.0 | 2.4E-09 | 1.1E-08 |

|                 |                 |                                                                                                                 |     |      |        |     |         |         |
|-----------------|-----------------|-----------------------------------------------------------------------------------------------------------------|-----|------|--------|-----|---------|---------|
| ENSG00000124302 | CHST8           | carbohydrate sulfotransferase 8 [Source:HGNC Symbol;Acc:HGNC:15993]                                             | 43  | 1.82 | 0.3050 | 6.0 | 2.4E-09 | 1.1E-08 |
| ENSG00000164542 | KIAA0895        | KIAA0895 [Source:HGNC Symbol;Acc:HGNC:22206]                                                                    | 318 | 0.62 | 0.1046 | 6.0 | 2.3E-09 | 1.1E-08 |
| ENSG00000152454 | ZNF256          | zinc finger protein 256 [Source:HGNC Symbol;Acc:HGNC:13049]                                                     | 284 | 0.69 | 0.1146 | 6.0 | 2.2E-09 | 1.0E-08 |
| ENSG00000104689 | TNFRSF10A       | TNF receptor superfamily member 10a [Source:HGNC Symbol;Acc:HGNC:11904]                                         | 239 | 0.72 | 0.1198 | 6.0 | 2.1E-09 | 1.0E-08 |
| ENSG00000182362 | YBEY            | yeY metalloendonuclease [Source:HGNC Symbol;Acc:HGNC:1299]                                                      | 411 | 0.56 | 0.0934 | 6.0 | 2.1E-09 | 9.8E-09 |
| ENSG00000186318 | BACE1           | beta-secretase 1 [Source:HGNC Symbol;Acc:HGNC:933]                                                              | 138 | 0.95 | 0.1581 | 6.0 | 2.0E-09 | 9.7E-09 |
| ENSG00000273802 | H2BC8           | H2B clustered histone 8 [Source:HGNC Symbol;Acc:HGNC:4746]                                                      | 161 | 0.91 | 0.1519 | 6.0 | 2.0E-09 | 9.6E-09 |
| ENSG00000164180 | TMEM161B        | transmembrane protein 161B [Source:HGNC Symbol;Acc:HGNC:28483]                                                  | 550 | 0.51 | 0.0855 | 6.0 | 2.0E-09 | 9.5E-09 |
| ENSG00000224861 | YBX1P1          | Y-box binding protein 1 pseudogene 1 [Source:HGNC Symbol;Acc:HGNC:8015]                                         | 399 | 0.56 | 0.0926 | 6.0 | 1.9E-09 | 9.0E-09 |
| ENSG00000133315 | MACROD1         | mono-ADP ribosylhydrolase 1 [Source:HGNC Symbol;Acc:HGNC:29598]                                                 | 550 | 0.51 | 0.0843 | 6.0 | 1.8E-09 | 8.8E-09 |
| ENSG00000124134 | KCNS1           | potassium voltage-gated channel modifier subfamily S member 1 [Source:HGNC Symbol;Acc:HGNC:630]                 | 197 | 0.86 | 0.1431 | 6.0 | 1.8E-09 | 8.5E-09 |
| ENSG00000261971 | MMP25-AS1       | MMP25 antisense RNA 1 [Source:HGNC Symbol;Acc:HGNC:51372]                                                       | 68  | 1.41 | 0.2336 | 6.0 | 1.7E-09 | 8.3E-09 |
| ENSG00000166831 | RBPMS2          | RNA binding protein, mRNA processing factor 2 [Source:HGNC Symbol;Acc:HGNC:19098]                               | 241 | 0.72 | 0.1192 | 6.0 | 1.7E-09 | 8.2E-09 |
| ENSG00000196935 | SRGAP1          | SLIT-ROBO Rho GTPase activating protein 1 [Source:HGNC Symbol;Acc:HGNC:17382]                                   | 481 | 0.55 | 0.0907 | 6.0 | 1.6E-09 | 7.9E-09 |
| ENSG00000138399 | FASTKD1         | FAST kinase domains 1 [Source:HGNC Symbol;Acc:HGNC:26150]                                                       | 288 | 0.67 | 0.1112 | 6.0 | 1.6E-09 | 7.9E-09 |
| ENSG00000105472 | CLEC11A         | C-type lectin domain containing 11A [Source:HGNC Symbol;Acc:HGNC:10576]                                         | 174 | 0.85 | 0.1407 | 6.0 | 1.6E-09 | 7.6E-09 |
| ENSG00000107295 | SH3GL2          | SH3 domain containing GRB2 like 2, endophilin A1 [Source:HGNC Symbol;Acc:HGNC:10831]                            | 67  | 1.39 | 0.2302 | 6.0 | 1.5E-09 | 7.4E-09 |
| ENSG00000177666 | PNPLA2          | patatin like phospholipase domain containing 2 [Source:HGNC Symbol;Acc:HGNC:30802]                              | 575 | 0.56 | 0.0929 | 6.0 | 1.5E-09 | 7.3E-09 |
| ENSG00000144278 | GALNT13         | polypeptide N-acetylgalactosaminyltransferase 13 [Source:HGNC Symbol;Acc:HGNC:23242]                            | 44  | 1.81 | 0.2987 | 6.0 | 1.5E-09 | 7.3E-09 |
| ENSG00000211448 | DIO2            | iodothyronine deiodinase 2 [Source:HGNC Symbol;Acc:HGNC:2884]                                                   | 138 | 0.96 | 0.1583 | 6.0 | 1.5E-09 | 7.0E-09 |
| ENSG00000131652 | THOC6           | THO complex 6 [Source:HGNC Symbol;Acc:HGNC:28369]                                                               | 389 | 0.60 | 0.0993 | 6.1 | 1.4E-09 | 6.8E-09 |
| ENSG00000253537 | PCDHGA7         | protocadherin gamma subfamily A, 7 [Source:HGNC Symbol;Acc:HGNC:8705]                                           | 141 | 0.96 | 0.1592 | 6.1 | 1.4E-09 | 6.7E-09 |
| ENSG00000205002 | AARD            | alanine and arginine rich domain containing protein [Source:HGNC Symbol;Acc:HGNC:33842]                         | 528 | 0.52 | 0.0850 | 6.1 | 1.4E-09 | 6.6E-09 |
| ENSG00000151388 | ADAMTS12        | ADAM metallopeptidase with thrombospondin type 1 motif 12 [Source:HGNC Symbol;Acc:HGNC:14605]                   | 116 | 1.20 | 0.1975 | 6.1 | 1.4E-09 | 6.5E-09 |
| ENSG00000135541 | AHI1            | Abelson helper integration site 1 [Source:HGNC Symbol;Acc:HGNC:21575]                                           | 233 | 0.81 | 0.1335 | 6.1 | 1.3E-09 | 6.5E-09 |
| ENSG00000122386 | ZNF205          | zinc finger protein 205 [Source:HGNC Symbol;Acc:HGNC:12996]                                                     | 158 | 0.91 | 0.1491 | 6.1 | 1.3E-09 | 6.2E-09 |
| ENSG00000116761 | CTH             | cystathionine gamma-lyase [Source:HGNC Symbol;Acc:HGNC:2501]                                                    | 48  | 1.74 | 0.2869 | 6.1 | 1.2E-09 | 6.0E-09 |
| ENSG00000197497 | ZNF665          | zinc finger protein 665 [Source:HGNC Symbol;Acc:HGNC:25885]                                                     | 59  | 1.53 | 0.2518 | 6.1 | 1.1E-09 | 5.5E-09 |
| ENSG00000253304 | TMEM200B        | transmembrane protein 200B [Source:HGNC Symbol;Acc:HGNC:33785]                                                  | 486 | 0.56 | 0.0920 | 6.1 | 1.1E-09 | 5.4E-09 |
| ENSG00000250920 | ENSG00000250920 | novel transcript                                                                                                | 22  | 5.52 | 0.9054 | 6.1 | 1.1E-09 | 5.4E-09 |
| ENSG00000250251 | PKD1P6          | polycystin 1, transient receptor potential channel interacting pseudogene 6 [Source:HGNC Symbol;Acc:HGNC:25025] | 164 | 0.90 | 0.1479 | 6.1 | 1.1E-09 | 5.4E-09 |
| ENSG00000224848 | ENSG00000224848 | novel transcript                                                                                                | 58  | 1.56 | 0.2552 | 6.1 | 1.1E-09 | 5.2E-09 |
| ENSG00000215154 | ENSG00000215154 | potassium channel tetramerisation domain containing 5 (KCTD5) pseudogene                                        | 108 | 1.14 | 0.1867 | 6.1 | 1.1E-09 | 5.1E-09 |
| ENSG00000247516 | MIR4458HG       | MIR4458 host gene [Source:HGNC Symbol;Acc:HGNC:49008]                                                           | 409 | 0.56 | 0.0925 | 6.1 | 1.0E-09 | 5.0E-09 |
| ENSG00000165731 | RET             | ret proto-oncogene [Source:HGNC Symbol;Acc:HGNC:9967]                                                           | 68  | 1.40 | 0.2297 | 6.1 | 9.9E-10 | 4.8E-09 |
| ENSG00000165312 | OTUD1           | OTU deubiquitinase 1 [Source:HGNC Symbol;Acc:HGNC:27346]                                                        | 335 | 0.76 | 0.1250 | 6.1 | 9.6E-10 | 4.7E-09 |
| ENSG00000229160 | ENSG00000229160 | novel transcript                                                                                                | 58  | 1.62 | 0.2648 | 6.1 | 9.0E-10 | 4.4E-09 |
| ENSG00000260219 | CD2BP2-DT       | CD2BP2 divergent transcript [Source:HGNC Symbol;Acc:HGNC:53029]                                                 | 40  | 1.94 | 0.3167 | 6.1 | 8.9E-10 | 4.4E-09 |
| ENSG00000172123 | SLFN12          | schlafen family member 12 [Source:HGNC Symbol;Acc:HGNC:25500]                                                   | 522 | 0.51 | 0.0828 | 6.1 | 8.9E-10 | 4.4E-09 |
| ENSG00000152413 | HOMER1          | homer scaffold protein 1 [Source:HGNC Symbol;Acc:HGNC:17512]                                                    | 469 | 0.57 | 0.0929 | 6.1 | 8.7E-10 | 4.3E-09 |
| ENSG00000137561 | TTPA            | alpha tocopherol transfer protein [Source:HGNC Symbol;Acc:HGNC:12404]                                           | 23  | 3.09 | 0.5036 | 6.1 | 8.5E-10 | 4.2E-09 |
| ENSG00000130477 | UNC13A          | unc-13 homolog A [Source:HGNC Symbol;Acc:HGNC:23150]                                                            | 408 | 0.57 | 0.0935 | 6.1 | 7.9E-10 | 3.9E-09 |



|                 |                 |                                                                                           |     |      |        |     |         |         |
|-----------------|-----------------|-------------------------------------------------------------------------------------------|-----|------|--------|-----|---------|---------|
| ENSG00000185684 | EP400P1         | EP400 pseudogene 1 [Source:HGNC Symbol;Acc:HGNC:26602]                                    | 246 | 0.75 | 0.1221 | 6.1 | 7.9E-10 | 3.9E-09 |
| ENSG00000151657 | KIN             | Kin17 DNA and RNA binding protein [Source:HGNC Symbol;Acc:HGNC:6327]                      | 280 | 0.71 | 0.1152 | 6.2 | 7.4E-10 | 3.7E-09 |
| ENSG00000054938 | CHRDL2          | chordin like 2 [Source:HGNC Symbol;Acc:HGNC:24168]                                        | 20  | 3.72 | 0.6030 | 6.2 | 7.2E-10 | 3.5E-09 |
| ENSG00000241058 | NSUN6           | NOP2/Sun RNA methyltransferase 6 [Source:HGNC Symbol;Acc:HGNC:23529]                      | 119 | 1.04 | 0.1688 | 6.2 | 6.3E-10 | 3.1E-09 |
| ENSG00000161298 | ZNF382          | zinc finger protein 382 [Source:HGNC Symbol;Acc:HGNC:17409]                               | 77  | 1.33 | 0.2158 | 6.2 | 6.3E-10 | 3.1E-09 |
| ENSG00000173237 | C11orf86        | chromosome 11 open reading frame 86 [Source:HGNC Symbol;Acc:HGNC:34442]                   | 31  | 7.50 | 1.2116 | 6.2 | 6.1E-10 | 3.0E-09 |
| ENSG00000176476 | SGF29           | SAGA complex associated factor 29 [Source:HGNC Symbol;Acc:HGNC:25156]                     | 175 | 0.91 | 0.1477 | 6.2 | 6.1E-10 | 3.0E-09 |
| ENSG00000232533 | ENSG00000232533 | novel transcript                                                                          | 149 | 0.94 | 0.1510 | 6.2 | 5.8E-10 | 2.9E-09 |
| ENSG00000157657 | ZNF618          | zinc finger protein 618 [Source:HGNC Symbol;Acc:HGNC:29416]                               | 579 | 0.53 | 0.0854 | 6.2 | 5.7E-10 | 2.8E-09 |
| ENSG00000269001 | ENSG00000269001 | zinc finger protein 818, pseudogene                                                       | 167 | 0.94 | 0.1510 | 6.2 | 5.5E-10 | 2.7E-09 |
| ENSG00000147655 | RSPO2           | R-spondin 2 [Source:HGNC Symbol;Acc:HGNC:28583]                                           | 51  | 1.73 | 0.2785 | 6.2 | 5.2E-10 | 2.6E-09 |
| ENSG00000224259 | LINC01133       | long intergenic non-protein coding RNA 1133 [Source:HGNC Symbol;Acc:HGNC:49447]           | 110 | 1.16 | 0.1871 | 6.2 | 5.2E-10 | 2.6E-09 |
| ENSG00000197857 | ZNF44           | zinc finger protein 44 [Source:HGNC Symbol;Acc:HGNC:13110]                                | 181 | 0.87 | 0.1393 | 6.2 | 5.1E-10 | 2.5E-09 |
| ENSG00000182986 | ZNF320          | zinc finger protein 320 [Source:HGNC Symbol;Acc:HGNC:13842]                               | 113 | 1.14 | 0.1822 | 6.2 | 4.6E-10 | 2.3E-09 |
| ENSG00000078725 | BRINP1          | BMP/retinoic acid inducible neural specific 1 [Source:HGNC Symbol;Acc:HGNC:2687]          | 18  | 7.69 | 1.2347 | 6.2 | 4.6E-10 | 2.3E-09 |
| ENSG00000263155 | MYZAP           | myocardial zonula adherens protein [Source:HGNC Symbol;Acc:HGNC:43444]                    | 24  | 2.99 | 0.4782 | 6.2 | 4.2E-10 | 2.1E-09 |
| ENSG00000197165 | SULT1A2         | sulfotransferase family 1A member 2 [Source:HGNC Symbol;Acc:HGNC:11454]                   | 19  | 3.84 | 0.6154 | 6.2 | 4.2E-10 | 2.1E-09 |
| ENSG00000184304 | PRKD1           | protein kinase D1 [Source:HGNC Symbol;Acc:HGNC:9407]                                      | 34  | 2.23 | 0.3559 | 6.3 | 3.9E-10 | 2.0E-09 |
| ENSG00000261804 | ENSG00000261804 | novel transcript                                                                          | 20  | 4.30 | 0.6875 | 6.3 | 3.9E-10 | 2.0E-09 |
| ENSG00000169627 | BOLA2B          | bolA family member 2B [Source:HGNC Symbol;Acc:HGNC:32479]                                 | 65  | 1.50 | 0.2397 | 6.3 | 3.9E-10 | 2.0E-09 |
| ENSG00000242960 | FTH1P23         | ferritin heavy chain 1 pseudogene 23 [Source:HGNC Symbol;Acc:HGNC:37641]                  | 242 | 0.76 | 0.1222 | 6.3 | 3.9E-10 | 1.9E-09 |
| ENSG00000173068 | BNC2            | basonuclin 2 [Source:HGNC Symbol;Acc:HGNC:30988]                                          | 23  | 2.97 | 0.4744 | 6.3 | 3.6E-10 | 1.8E-09 |
| ENSG00000130818 | ZNF426          | zinc finger protein 426 [Source:HGNC Symbol;Acc:HGNC:20725]                               | 351 | 0.64 | 0.1019 | 6.3 | 3.6E-10 | 1.8E-09 |
| ENSG00000144810 | COL8A1          | collagen type VIII alpha 1 chain [Source:HGNC Symbol;Acc:HGNC:2215]                       | 61  | 1.58 | 0.2518 | 6.3 | 3.5E-10 | 1.8E-09 |
| ENSG00000165626 | BEND7           | BEN domain containing 7 [Source:HGNC Symbol;Acc:HGNC:23514]                               | 110 | 1.13 | 0.1804 | 6.3 | 3.4E-10 | 1.7E-09 |
| ENSG00000131669 | NINJ1           | ninjurin 1 [Source:HGNC Symbol;Acc:HGNC:7824]                                             | 441 | 0.56 | 0.0890 | 6.3 | 3.2E-10 | 1.6E-09 |
| ENSG0000018236  | CNTN1           | contactin 1 [Source:HGNC Symbol;Acc:HGNC:2171]                                            | 27  | 2.70 | 0.4296 | 6.3 | 3.1E-10 | 1.6E-09 |
| ENSG00000146094 | DOK3            | docking protein 3 [Source:HGNC Symbol;Acc:HGNC:24583]                                     | 97  | 1.24 | 0.1974 | 6.3 | 3.1E-10 | 1.6E-09 |
| ENSG00000176046 | NUPR1           | nuclear protein 1, transcriptional regulator [Source:HGNC Symbol;Acc:HGNC:29990]          | 336 | 1.25 | 0.1985 | 6.3 | 2.9E-10 | 1.5E-09 |
| ENSG00000099385 | BCL7C           | BAF chromatin remodeling complex subunit BCL7C [Source:HGNC Symbol;Acc:HGNC:1006]         | 294 | 0.69 | 0.1090 | 6.3 | 2.8E-10 | 1.4E-09 |
| ENSG00000235587 | GAPDHP65        | glyceraldehyde 3 phosphate dehydrogenase pseudogene 65 [Source:HGNC Symbol;Acc:HGNC:4143] | 226 | 0.79 | 0.1248 | 6.3 | 2.7E-10 | 1.4E-09 |
| ENSG00000141252 | VPS53           | VPS53 subunit of GARP complex [Source:HGNC Symbol;Acc:HGNC:25608]                         | 421 | 0.60 | 0.0952 | 6.3 | 2.3E-10 | 1.2E-09 |
| ENSG00000073849 | ST6GAL1         | ST6 beta-galactoside alpha-2,6-sialyltransferase 1 [Source:HGNC Symbol;Acc:HGNC:10860]    | 73  | 1.45 | 0.2283 | 6.3 | 2.3E-10 | 1.2E-09 |
| ENSG00000204611 | ZNF616          | zinc finger protein 616 [Source:HGNC Symbol;Acc:HGNC:28062]                               | 162 | 0.96 | 0.1506 | 6.3 | 2.3E-10 | 1.2E-09 |
| ENSG00000155974 | GRIP1           | glutamate receptor interacting protein 1 [Source:HGNC Symbol;Acc:HGNC:18708]              | 103 | 1.25 | 0.1963 | 6.3 | 2.2E-10 | 1.1E-09 |
| ENSG00000145214 | DGKQ            | diacylglycerol kinase theta [Source:HGNC Symbol;Acc:HGNC:2856]                            | 398 | 0.63 | 0.0988 | 6.3 | 2.2E-10 | 1.1E-09 |
| ENSG00000103495 | MAZ             | MYC associated zinc finger protein [Source:HGNC Symbol;Acc:HGNC:6914]                     | 296 | 0.81 | 0.1269 | 6.3 | 2.2E-10 | 1.1E-09 |
| ENSG00000163485 | ADORA1          | adenosine A1 receptor [Source:HGNC Symbol;Acc:HGNC:262]                                   | 126 | 1.05 | 0.1660 | 6.4 | 2.1E-10 | 1.1E-09 |
| ENSG00000081665 | ZNF506          | zinc finger protein 506 [Source:HGNC Symbol;Acc:HGNC:23780]                               | 53  | 1.74 | 0.2739 | 6.4 | 1.9E-10 | 9.8E-10 |
| ENSG00000170954 | ZNF415          | zinc finger protein 415 [Source:HGNC Symbol;Acc:HGNC:20636]                               | 182 | 0.93 | 0.1456 | 6.4 | 1.8E-10 | 9.3E-10 |
| ENSG00000100036 | SLC35E4         | solute carrier family 35 member E4 [Source:HGNC Symbol;Acc:HGNC:17058]                    | 154 | 1.01 | 0.1577 | 6.4 | 1.7E-10 | 8.7E-10 |
| ENSG00000197013 | ZNF429          | zinc finger protein 429 [Source:HGNC Symbol;Acc:HGNC:20817]                               | 81  | 1.43 | 0.2231 | 6.4 | 1.6E-10 | 8.4E-10 |

|                 |            |                                                                                                    |     |      |        |     |         |         |
|-----------------|------------|----------------------------------------------------------------------------------------------------|-----|------|--------|-----|---------|---------|
| ENSG00000174206 | C12orf66   | chromosome 12 open reading frame 66 [Source:HGNC Symbol;Acc:HGNC:26517]                            | 130 | 1.07 | 0.1669 | 6.4 | 1.5E-10 | 7.9E-10 |
| ENSG00000107159 | CA9        | carbonic anhydrase 9 [Source:HGNC Symbol;Acc:HGNC:1383]                                            | 38  | 2.23 | 0.3482 | 6.4 | 1.5E-10 | 7.6E-10 |
| ENSG00000072954 | TMEM38A    | transmembrane protein 38A [Source:HGNC Symbol;Acc:HGNC:28462]                                      | 376 | 0.63 | 0.0989 | 6.4 | 1.4E-10 | 7.3E-10 |
| ENSG00000138207 | RBP4       | retinol binding protein 4 [Source:HGNC Symbol;Acc:HGNC:9922]                                       | 31  | 2.45 | 0.3814 | 6.4 | 1.3E-10 | 6.8E-10 |
| ENSG00000236751 | LINC01186  | long intergenic non-protein coding RNA 1186 [Source:HGNC Symbol;Acc:HGNC:49573]                    | 110 | 1.16 | 0.1808 | 6.4 | 1.2E-10 | 6.4E-10 |
| ENSG00000276386 | CNTNAP3P2  | CNTNAP3 pseudogene 2 [Source:HGNC Symbol;Acc:HGNC:49589]                                           | 21  | 3.94 | 0.6116 | 6.4 | 1.2E-10 | 6.3E-10 |
| ENSG00000150995 | ITPR1      | inositol 1,4,5-trisphosphate receptor type 1 [Source:HGNC Symbol;Acc:HGNC:6180]                    | 128 | 1.05 | 0.1635 | 6.4 | 1.2E-10 | 6.3E-10 |
| ENSG00000204540 | PSORS1C1   | psoriasis susceptibility 1 candidate 1 [Source:HGNC Symbol;Acc:HGNC:17202]                         | 47  | 1.86 | 0.2889 | 6.4 | 1.2E-10 | 6.2E-10 |
| ENSG00000236753 | MKLN1-AS   | MKLN1 antisense RNA [Source:HGNC Symbol;Acc:HGNC:40374]                                            | 87  | 1.39 | 0.2157 | 6.4 | 1.2E-10 | 6.1E-10 |
| ENSG00000047617 | ANO2       | anoctamin 2 [Source:HGNC Symbol;Acc:HGNC:1183]                                                     | 74  | 1.43 | 0.2218 | 6.4 | 1.1E-10 | 5.9E-10 |
| ENSG00000163689 | CFAP20DC   | CFAP20 domain containing [Source:HGNC Symbol;Acc:HGNC:24763]                                       | 107 | 1.17 | 0.1808 | 6.5 | 9.5E-11 | 4.9E-10 |
| ENSG00000067992 | PDK3       | pyruvate dehydrogenase kinase 3 [Source:HGNC Symbol;Acc:HGNC:8811]                                 | 172 | 0.93 | 0.1433 | 6.5 | 9.0E-11 | 4.7E-10 |
| ENSG00000142156 | COL6A1     | collagen type VI alpha 1 chain [Source:HGNC Symbol;Acc:HGNC:2211]                                  | 747 | 0.55 | 0.0852 | 6.5 | 8.7E-11 | 4.5E-10 |
| ENSG00000183397 | C19orf71   | chromosome 19 open reading frame 71 [Source:HGNC Symbol;Acc:HGNC:34496]                            | 93  | 1.29 | 0.1987 | 6.5 | 8.4E-11 | 4.4E-10 |
| ENSG00000147804 | SLC39A4    | solute carrier family 39 member 4 [Source:HGNC Symbol;Acc:HGNC:17129]                              | 171 | 0.92 | 0.1413 | 6.5 | 8.3E-11 | 4.3E-10 |
| ENSG00000103254 | ANTKMT     | adenine nucleotide translocase lysine methyltransferase [Source:HGNC Symbol;Acc:HGNC:14152]        | 319 | 1.35 | 0.2081 | 6.5 | 8.0E-11 | 4.2E-10 |
| ENSG00000279088 | ENSG000002 | TEC                                                                                                | 194 | 0.91 | 0.1394 | 6.5 | 8.0E-11 | 4.2E-10 |
| ENSG00000114251 | WNT5A      | Wnt family member 5A [Source:HGNC Symbol;Acc:HGNC:12784]                                           | 206 | 0.87 | 0.1330 | 6.5 | 7.7E-11 | 4.0E-10 |
| ENSG00000188158 | NHS        | NHS actin remodeling regulator [Source:HGNC Symbol;Acc:HGNC:7820]                                  | 394 | 0.65 | 0.0993 | 6.5 | 7.7E-11 | 4.0E-10 |
| ENSG00000070081 | NUCB2      | nucleobindin 2 [Source:HGNC Symbol;Acc:HGNC:8044]                                                  | 445 | 0.59 | 0.0907 | 6.5 | 7.7E-11 | 4.0E-10 |
| ENSG00000105379 | ETFB       | electron transfer flavoprotein subunit beta [Source:HGNC Symbol;Acc:HGNC:3482]                     | 219 | 0.82 | 0.1265 | 6.5 | 7.6E-11 | 4.0E-10 |
| ENSG00000205763 | RP9P       | RP9 pseudogene [Source:HGNC Symbol;Acc:HGNC:33969]                                                 | 244 | 0.78 | 0.1198 | 6.5 | 7.2E-11 | 3.8E-10 |
| ENSG00000166582 | CENPV      | centromere protein V [Source:HGNC Symbol;Acc:HGNC:29920]                                           | 185 | 0.88 | 0.1353 | 6.5 | 7.0E-11 | 3.7E-10 |
| ENSG00000107611 | CUBN       | cubilin [Source:HGNC Symbol;Acc:HGNC:2548]                                                         | 21  | 4.17 | 0.6402 | 6.5 | 7.0E-11 | 3.7E-10 |
| ENSG00000145781 | COMMD10    | COMM domain containing 10 [Source:HGNC Symbol;Acc:HGNC:30201]                                      | 447 | 0.62 | 0.0950 | 6.5 | 6.7E-11 | 3.5E-10 |
| ENSG00000287692 | ENSG000002 | novel transcript                                                                                   | 22  | 4.76 | 0.7275 | 6.5 | 5.9E-11 | 3.1E-10 |
| ENSG00000171403 | KRT9       | keratin 9 [Source:HGNC Symbol;Acc:HGNC:6447]                                                       | 184 | 0.92 | 0.1402 | 6.5 | 5.8E-11 | 3.1E-10 |
| ENSG00000205885 | C1RL-AS1   | C1RL antisense RNA 1 [Source:HGNC Symbol;Acc:HGNC:27461]                                           | 21  | 4.46 | 0.6803 | 6.6 | 5.6E-11 | 3.0E-10 |
| ENSG00000241990 | PRR34-AS1  | PRR34 antisense RNA 1 [Source:HGNC Symbol;Acc:HGNC:50499]                                          | 27  | 2.83 | 0.4315 | 6.6 | 5.6E-11 | 3.0E-10 |
| ENSG00000232098 | ENSG000002 | novel transcript                                                                                   | 385 | 0.62 | 0.0941 | 6.6 | 5.4E-11 | 2.9E-10 |
| ENSG00000174804 | FZD4       | frizzled class receptor 4 [Source:HGNC Symbol;Acc:HGNC:4042]                                       | 185 | 0.90 | 0.1369 | 6.6 | 5.0E-11 | 2.7E-10 |
| ENSG00000234444 | ZNF736     | zinc finger protein 736 [Source:HGNC Symbol;Acc:HGNC:32467]                                        | 46  | 2.09 | 0.3174 | 6.6 | 4.8E-11 | 2.6E-10 |
| ENSG00000205133 | TRIQK      | triple QxxK/R motif containing [Source:HGNC Symbol;Acc:HGNC:27828]                                 | 90  | 1.31 | 0.1985 | 6.6 | 4.5E-11 | 2.4E-10 |
| ENSG00000157554 | ERG        | ETS transcription factor ERG [Source:HGNC Symbol;Acc:HGNC:3446]                                    | 45  | 2.03 | 0.3078 | 6.6 | 4.5E-11 | 2.4E-10 |
| ENSG00000122873 | CDS1D      | CDGSH iron sulfur domain 1 [Source:HGNC Symbol;Acc:HGNC:30880]                                     | 404 | 0.61 | 0.0925 | 6.6 | 4.4E-11 | 2.3E-10 |
| ENSG00000147119 | CHST7      | carbohydrate sulfotransferase 7 [Source:HGNC Symbol;Acc:HGNC:13817]                                | 341 | 1.62 | 0.2451 | 6.6 | 4.2E-11 | 2.2E-10 |
| ENSG00000148488 | ST8SIA6    | ST8 alpha-N-acetyl-neuraminidase alpha-2,8-sialyltransferase 6 [Source:HGNC Symbol;Acc:HGNC:23317] | 22  | 4.76 | 0.7216 | 6.6 | 4.1E-11 | 2.2E-10 |
| ENSG00000253368 | TRNP1      | TMF1 regulated nuclear protein 1 [Source:HGNC Symbol;Acc:HGNC:34348]                               | 274 | 0.83 | 0.1252 | 6.6 | 3.8E-11 | 2.0E-10 |
| ENSG00000182263 | FIGN       | fidgetin, microtubule severing factor [Source:HGNC Symbol;Acc:HGNC:13285]                          | 622 | 0.52 | 0.0779 | 6.6 | 3.8E-11 | 2.0E-10 |
| ENSG00000091831 | ESR1       | estrogen receptor 1 [Source:HGNC Symbol;Acc:HGNC:3467]                                             | 33  | 2.39 | 0.3613 | 6.6 | 3.8E-11 | 2.0E-10 |
| ENSG00000198440 | ZNF583     | zinc finger protein 583 [Source:HGNC Symbol;Acc:HGNC:26427]                                        | 177 | 0.97 | 0.1462 | 6.6 | 3.7E-11 | 2.0E-10 |
| ENSG00000131148 | EMC8       | ER membrane protein complex subunit 8 [Source:HGNC Symbol;Acc:HGNC:7864]                           | 447 | 0.62 | 0.0930 | 6.6 | 3.5E-11 | 1.9E-10 |

|                 |                 |                                                                                                      |     |      |        |     |         |         |
|-----------------|-----------------|------------------------------------------------------------------------------------------------------|-----|------|--------|-----|---------|---------|
| ENSG00000234171 | RNASEH1-AS1     | RNASEH1 antisense RNA 1 [Source:HGNC Symbol;Acc:HGNC:49289]                                          | 161 | 0.99 | 0.1494 | 6.6 | 3.5E-11 | 1.9E-10 |
| ENSG00000234997 | ENSG00000234997 | novel transcript                                                                                     | 25  | 3.13 | 0.4720 | 6.6 | 3.2E-11 | 1.7E-10 |
| ENSG00000081803 | CADPS2          | calcium dependent secretion activator 2 [Source:HGNC Symbol;Acc:HGNC:16018]                          | 94  | 1.37 | 0.2066 | 6.6 | 2.9E-11 | 1.6E-10 |
| ENSG00000173818 | ENDOV           | endonuclease V [Source:HGNC Symbol;Acc:HGNC:26640]                                                   | 409 | 0.65 | 0.0980 | 6.7 | 2.8E-11 | 1.5E-10 |
| ENSG00000219481 | NBPF1           | NBPF member 1 [Source:HGNC Symbol;Acc:HGNC:26088]                                                    | 575 | 0.56 | 0.0849 | 6.7 | 2.8E-11 | 1.5E-10 |
| ENSG00000203326 | ZNF525          | zinc finger protein 525 [Source:HGNC Symbol;Acc:HGNC:29423]                                          | 508 | 0.58 | 0.0869 | 6.7 | 2.8E-11 | 1.5E-10 |
| ENSG00000142920 | AZIN2           | antizyme inhibitor 2 [Source:HGNC Symbol;Acc:HGNC:29957]                                             | 100 | 1.30 | 0.1953 | 6.7 | 2.7E-11 | 1.4E-10 |
| ENSG00000255836 | ENSG00000255836 | M-phase phosphoprotein 8 (MPHOSPH8) pseudogene                                                       | 70  | 1.57 | 0.2357 | 6.7 | 2.5E-11 | 1.4E-10 |
| ENSG00000269439 | PGLS-DT         | PGLS divergent transcript [Source:HGNC Symbol;Acc:HGNC:55274]                                        | 88  | 1.37 | 0.2051 | 6.7 | 2.5E-11 | 1.4E-10 |
| ENSG00000181666 | ZNF875          | zinc finger protein 875 [Source:HGNC Symbol;Acc:HGNC:4928]                                           | 580 | 0.56 | 0.0845 | 6.7 | 2.4E-11 | 1.3E-10 |
| ENSG00000261092 | LINC02178       | long intergenic non-protein coding RNA 2178 [Source:HGNC Symbol;Acc:HGNC:53040]                      | 208 | 0.91 | 0.1357 | 6.7 | 2.1E-11 | 1.1E-10 |
| ENSG00000151422 | FER             | FER tyrosine kinase [Source:HGNC Symbol;Acc:HGNC:3655]                                               | 593 | 0.52 | 0.0777 | 6.7 | 2.0E-11 | 1.1E-10 |
| ENSG00000144935 | TRPC1           | transient receptor potential cation channel subfamily C member 1 [Source:HGNC Symbol;Acc:HGNC:12535] | 178 | 0.95 | 0.1410 | 6.7 | 1.8E-11 | 9.9E-11 |
| ENSG00000213020 | ZNF611          | zinc finger protein 611 [Source:HGNC Symbol;Acc:HGNC:28766]                                          | 262 | 0.78 | 0.1154 | 6.7 | 1.8E-11 | 9.8E-11 |
| ENSG00000162729 | IGSF8           | immunoglobulin superfamily member 8 [Source:HGNC Symbol;Acc:HGNC:17813]                              | 671 | 0.50 | 0.0748 | 6.7 | 1.6E-11 | 8.9E-11 |
| ENSG00000189362 | NEMP2           | nuclear envelope integral membrane protein 2 [Source:HGNC Symbol;Acc:HGNC:33700]                     | 276 | 0.78 | 0.1164 | 6.7 | 1.6E-11 | 8.9E-11 |
| ENSG00000133627 | ACTR3B          | actin related protein 3B [Source:HGNC Symbol;Acc:HGNC:17256]                                         | 295 | 0.74 | 0.1102 | 6.7 | 1.5E-11 | 8.2E-11 |
| ENSG00000237765 | FAM200B         | family with sequence similarity 200 member B [Source:HGNC Symbol;Acc:HGNC:27740]                     | 502 | 0.56 | 0.0829 | 6.7 | 1.5E-11 | 8.2E-11 |
| ENSG00000145147 | SLIT2           | slit guidance ligand 2 [Source:HGNC Symbol;Acc:HGNC:11086]                                           | 38  | 2.36 | 0.3494 | 6.8 | 1.5E-11 | 8.0E-11 |
| ENSG00000137440 | FGFBP1          | fibroblast growth factor binding protein 1 [Source:HGNC Symbol;Acc:HGNC:19695]                       | 596 | 0.55 | 0.0814 | 6.8 | 1.4E-11 | 7.9E-11 |
| ENSG00000203993 | ARRDC1-AS1      | ARRDC1 antisense RNA 1 [Source:HGNC Symbol;Acc:HGNC:23395]                                           | 399 | 0.63 | 0.0932 | 6.8 | 1.4E-11 | 7.5E-11 |
| ENSG00000284968 | ENSG00000284968 | Novel transcript, antisense to AFF1                                                                  | 72  | 1.60 | 0.2370 | 6.8 | 1.3E-11 | 7.2E-11 |
| ENSG00000251281 | ENSG00000251281 | novel transcript                                                                                     | 26  | 8.23 | 1.2166 | 6.8 | 1.3E-11 | 7.2E-11 |
| ENSG00000204396 | VWA7            | von Willebrand factor A domain containing 7 [Source:HGNC Symbol;Acc:HGNC:13939]                      | 211 | 0.92 | 0.1354 | 6.8 | 1.3E-11 | 7.0E-11 |
| ENSG00000188641 | DPYD            | dihydropyrimidine dehydrogenase [Source:HGNC Symbol;Acc:HGNC:3012]                                   | 514 | 0.56 | 0.0830 | 6.8 | 1.2E-11 | 6.8E-11 |
| ENSG00000178573 | MAF             | MAF bZIP transcription factor [Source:HGNC Symbol;Acc:HGNC:6776]                                     | 63  | 1.73 | 0.2548 | 6.8 | 1.2E-11 | 6.7E-11 |
| ENSG00000180233 | ZNRF2           | zinc and ring finger 2 [Source:HGNC Symbol;Acc:HGNC:22316]                                           | 412 | 0.75 | 0.1101 | 6.8 | 1.1E-11 | 6.3E-11 |
| ENSG00000171827 | ZNF570          | zinc finger protein 570 [Source:HGNC Symbol;Acc:HGNC:26416]                                          | 159 | 1.02 | 0.1499 | 6.8 | 1.1E-11 | 6.0E-11 |
| ENSG00000151131 | C12orf45        | chromosome 12 open reading frame 45 [Source:HGNC Symbol;Acc:HGNC:28628]                              | 262 | 0.78 | 0.1141 | 6.8 | 1.1E-11 | 5.9E-11 |
| ENSG00000184599 | TAF3            | TAF3 chemokine like family member 3 [Source:HGNC Symbol;Acc:HGNC:21590]                              | 29  | 2.97 | 0.4362 | 6.8 | 1.0E-11 | 5.8E-11 |
| ENSG00000180176 | TH              | tyrosine hydroxylase [Source:HGNC Symbol;Acc:HGNC:11782]                                             | 53  | 1.85 | 0.2709 | 6.8 | 8.5E-12 | 4.7E-11 |
| ENSG00000135469 | COQ10A          | coenzyme Q10A [Source:HGNC Symbol;Acc:HGNC:26515]                                                    | 209 | 0.88 | 0.1281 | 6.8 | 7.8E-12 | 4.4E-11 |
| ENSG00000262454 | MIR193BHG       | MIR193b-365a host gene [Source:HGNC Symbol;Acc:HGNC:51945]                                           | 430 | 0.65 | 0.0946 | 6.8 | 7.5E-12 | 4.2E-11 |
| ENSG00000004700 | RECQL           | RecQ like helicase [Source:HGNC Symbol;Acc:HGNC:9948]                                                | 632 | 0.51 | 0.0747 | 6.9 | 7.4E-12 | 4.1E-11 |
| ENSG00000169902 | TPST1           | tyrosylprotein sulfotransferase 1 [Source:HGNC Symbol;Acc:HGNC:12020]                                | 338 | 0.78 | 0.1145 | 6.9 | 7.1E-12 | 4.0E-11 |
| ENSG00000198521 | ZNF43           | zinc finger protein 43 [Source:HGNC Symbol;Acc:HGNC:13109]                                           | 55  | 1.84 | 0.2678 | 6.9 | 7.1E-12 | 4.0E-11 |
| ENSG00000112210 | RAB23           | RAB23, member RAS oncogene family [Source:HGNC Symbol;Acc:HGNC:14263]                                | 376 | 0.68 | 0.0985 | 6.9 | 7.1E-12 | 3.9E-11 |
| ENSG00000254858 | MPV17L2         | MPV17 mitochondrial inner membrane protein like 2 [Source:HGNC Symbol;Acc:HGNC:28177]                | 730 | 0.51 | 0.0746 | 6.9 | 7.1E-12 | 3.9E-11 |
| ENSG00000188015 | S100A3          | S100 calcium binding protein A3 [Source:HGNC Symbol;Acc:HGNC:10493]                                  | 49  | 1.95 | 0.2838 | 6.9 | 6.9E-12 | 3.9E-11 |
| ENSG00000225439 | BOLA3-AS1       | BOLA3 divergent transcript [Source:HGNC Symbol;Acc:HGNC:42922]                                       | 326 | 0.70 | 0.1020 | 6.9 | 6.8E-12 | 3.8E-11 |
| ENSG00000198353 | HOXC4           | homeobox C4 [Source:HGNC Symbol;Acc:HGNC:5126]                                                       | 85  | 1.44 | 0.2100 | 6.9 | 6.6E-12 | 3.7E-11 |
| ENSG00000268223 | ARL14EPL        | ADP ribosylation factor like GTPase 14 effector protein like [Source:HGNC Symbol;Acc:HGNC:44201]     | 23  | 4.35 | 0.6323 | 6.9 | 6.3E-12 | 3.5E-11 |

|                 |                 |                                                                                          |     |      |        |     |         |         |
|-----------------|-----------------|------------------------------------------------------------------------------------------|-----|------|--------|-----|---------|---------|
| ENSG00000038295 | TLL1            | tolloid like 1 [Source:HGNC Symbol;Acc:HGNC:11843]                                       | 27  | 3.18 | 0.4604 | 6.9 | 5.1E-12 | 2.9E-11 |
| ENSG00000131370 | SH3BP5          | SH3 domain binding protein 5 [Source:HGNC Symbol;Acc:HGNC:10827]                         | 208 | 0.91 | 0.1314 | 6.9 | 4.9E-12 | 2.8E-11 |
| ENSG00000172086 | KRCC1           | lysine rich coiled-coil 1 [Source:HGNC Symbol;Acc:HGNC:28039]                            | 281 | 0.80 | 0.1153 | 6.9 | 4.8E-12 | 2.7E-11 |
| ENSG00000158966 | CACHD1          | cache domain containing 1 [Source:HGNC Symbol;Acc:HGNC:29314]                            | 280 | 0.78 | 0.1129 | 6.9 | 4.7E-12 | 2.7E-11 |
| ENSG00000123685 | BATF3           | basic leucine zipper ATF-like transcription factor 3 [Source:HGNC Symbol;Acc:HGNC:28915] | 117 | 1.21 | 0.1750 | 6.9 | 4.7E-12 | 2.7E-11 |
| ENSG00000145107 | TM4SF19         | transmembrane 4 L six family member 19 [Source:HGNC Symbol;Acc:HGNC:25167]               | 25  | 3.72 | 0.5369 | 6.9 | 4.5E-12 | 2.5E-11 |
| ENSG00000259583 | ENSG00000259583 | novel transcript, antisense to LRRK1 and ALDH1A3                                         | 49  | 1.99 | 0.2862 | 6.9 | 4.0E-12 | 2.3E-11 |
| ENSG00000196843 | ARID5A          | AT-rich interaction domain 5A [Source:HGNC Symbol;Acc:HGNC:17361]                        | 219 | 0.89 | 0.1279 | 6.9 | 3.9E-12 | 2.2E-11 |
| ENSG00000269416 | LINC01224       | long intergenic non-protein coding RNA 1224 [Source:HGNC Symbol;Acc:HGNC:49676]          | 149 | 1.06 | 0.1525 | 7.0 | 3.6E-12 | 2.0E-11 |
| ENSG00000085644 | ZNF213          | zinc finger protein 213 [Source:HGNC Symbol;Acc:HGNC:13005]                              | 196 | 0.95 | 0.1360 | 7.0 | 3.6E-12 | 2.0E-11 |
| ENSG00000182870 | GALNT9          | polypeptide N-acetylgalactosaminyltransferase 9 [Source:HGNC Symbol;Acc:HGNC:4131]       | 24  | 4.01 | 0.5758 | 7.0 | 3.4E-12 | 1.9E-11 |
| ENSG00000197265 | GTF2E2          | general transcription factor IIE subunit 2 [Source:HGNC Symbol;Acc:HGNC:4651]            | 435 | 0.64 | 0.0915 | 7.0 | 3.4E-12 | 1.9E-11 |
| ENSG00000135736 | CCDC102A        | coiled-coil domain containing 102A [Source:HGNC Symbol;Acc:HGNC:28097]                   | 385 | 0.66 | 0.0951 | 7.0 | 3.1E-12 | 1.8E-11 |
| ENSG00000179965 | ZNF771          | zinc finger protein 771 [Source:HGNC Symbol;Acc:HGNC:29653]                              | 127 | 1.19 | 0.1701 | 7.0 | 2.8E-12 | 1.6E-11 |
| ENSG00000196214 | ZNF766          | zinc finger protein 766 [Source:HGNC Symbol;Acc:HGNC:28063]                              | 441 | 0.62 | 0.0887 | 7.0 | 2.7E-12 | 1.6E-11 |
| ENSG00000230267 | HERC2P4         | hect domain and RLD 2 pseudogene 4 [Source:HGNC Symbol;Acc:HGNC:4872]                    | 27  | 3.21 | 0.4594 | 7.0 | 2.7E-12 | 1.5E-11 |
| ENSG00000161980 | POLR3K          | RNA polymerase III subunit K [Source:HGNC Symbol;Acc:HGNC:14121]                         | 637 | 0.52 | 0.0750 | 7.0 | 2.6E-12 | 1.5E-11 |
| ENSG00000168273 | SMIM4           | small integral membrane protein 4 [Source:HGNC Symbol;Acc:HGNC:37257]                    | 795 | 0.51 | 0.0734 | 7.0 | 2.4E-12 | 1.4E-11 |
| ENSG00000164509 | IL31RA          | interleukin 31 receptor A [Source:HGNC Symbol;Acc:HGNC:18969]                            | 147 | 1.08 | 0.1542 | 7.0 | 2.3E-12 | 1.3E-11 |
| ENSG00000103319 | EEF2K           | eukaryotic elongation factor 2 kinase [Source:HGNC Symbol;Acc:HGNC:24615]                | 624 | 0.55 | 0.0777 | 7.0 | 2.2E-12 | 1.3E-11 |
| ENSG00000276180 | H4C9            | H4 clustered histone 9 [Source:HGNC Symbol;Acc:HGNC:4793]                                | 307 | 0.81 | 0.1157 | 7.0 | 2.1E-12 | 1.2E-11 |
| ENSG00000161558 | TMEM143         | transmembrane protein 143 [Source:HGNC Symbol;Acc:HGNC:25603]                            | 282 | 0.78 | 0.1101 | 7.0 | 1.8E-12 | 1.1E-11 |
| ENSG00000100285 | NEFH            | neurofilament heavy [Source:HGNC Symbol;Acc:HGNC:7737]                                   | 33  | 2.67 | 0.3784 | 7.1 | 1.8E-12 | 1.0E-11 |
| ENSG00000103274 | NUBP1           | nucleotide binding protein 1 [Source:HGNC Symbol;Acc:HGNC:8041]                          | 258 | 0.81 | 0.1150 | 7.1 | 1.7E-12 | 1.0E-11 |
| ENSG00000165443 | PHYHIPL         | phytanoyl-CoA 2-hydroxylase interacting protein like [Source:HGNC Symbol;Acc:HGNC:29378] | 141 | 1.23 | 0.1746 | 7.1 | 1.7E-12 | 9.8E-12 |
| ENSG00000256229 | ZNF486          | zinc finger protein 486 [Source:HGNC Symbol;Acc:HGNC:20807]                              | 64  | 1.79 | 0.2532 | 7.1 | 1.6E-12 | 9.3E-12 |
| ENSG00000173546 | CSPG4           | chondroitin sulfate proteoglycan 4 [Source:HGNC Symbol;Acc:HGNC:2466]                    | 156 | 1.20 | 0.1693 | 7.1 | 1.6E-12 | 9.2E-12 |
| ENSG00000183454 | GRIN2A          | glutamate ionotropic receptor NMDA type subunit 2A [Source:HGNC Symbol;Acc:HGNC:4585]    | 35  | 6.18 | 0.8734 | 7.1 | 1.5E-12 | 8.8E-12 |
| ENSG00000137343 | ATAT1           | alpha tubulin acetyltransferase 1 [Source:HGNC Symbol;Acc:HGNC:21186]                    | 43  | 2.25 | 0.3176 | 7.1 | 1.3E-12 | 7.8E-12 |
| ENSG00000175643 | RMI2            | RecQ mediated genome instability 2 [Source:HGNC Symbol;Acc:HGNC:28349]                   | 379 | 0.70 | 0.0990 | 7.1 | 1.3E-12 | 7.6E-12 |
| ENSG00000157613 | CREB3L1         | cAMP responsive element binding protein 3 like 1 [Source:HGNC Symbol;Acc:HGNC:18856]     | 88  | 1.47 | 0.2070 | 7.1 | 1.2E-12 | 7.3E-12 |
| ENSG00000197385 | ZNF860          | zinc finger protein 860 [Source:HGNC Symbol;Acc:HGNC:34513]                              | 154 | 1.11 | 0.1561 | 7.1 | 1.2E-12 | 7.2E-12 |
| ENSG00000111450 | STX2            | syntaxin 2 [Source:HGNC Symbol;Acc:HGNC:3403]                                            | 110 | 1.30 | 0.1824 | 7.1 | 1.2E-12 | 7.1E-12 |
| ENSG00000088826 | SMOX            | spermine oxidase [Source:HGNC Symbol;Acc:HGNC:15862]                                     | 342 | 0.76 | 0.1064 | 7.1 | 1.2E-12 | 7.0E-12 |
| ENSG00000243232 | PCDHAC2         | protocadherin alpha subfamily C, 2 [Source:HGNC Symbol;Acc:HGNC:8677]                    | 45  | 2.36 | 0.3321 | 7.1 | 1.2E-12 | 6.9E-12 |
| ENSG00000081853 | PCDHGA2         | protocadherin gamma subfamily A, 2 [Source:HGNC Symbol;Acc:HGNC:8700]                    | 222 | 0.91 | 0.1277 | 7.1 | 1.2E-12 | 6.9E-12 |
| ENSG00000103494 | RPGRIP1L        | RPGRIP1 like [Source:HGNC Symbol;Acc:HGNC:29168]                                         | 403 | 0.65 | 0.0921 | 7.1 | 1.2E-12 | 6.8E-12 |
| ENSG00000065057 | NTHL1           | nth like DNA glycosylase 1 [Source:HGNC Symbol;Acc:HGNC:8028]                            | 214 | 0.92 | 0.1300 | 7.1 | 1.2E-12 | 6.7E-12 |
| ENSG00000105141 | CASP14          | caspase 14 [Source:HGNC Symbol;Acc:HGNC:1502]                                            | 762 | 6.27 | 0.8818 | 7.1 | 1.1E-12 | 6.5E-12 |
| ENSG00000103253 | HAGHL           | hydroxyacylglutathione hydrolase like [Source:HGNC Symbol;Acc:HGNC:14177]                | 125 | 1.25 | 0.1751 | 7.1 | 1.1E-12 | 6.4E-12 |
| ENSG00000235601 | BARX1-DT        | BARX1 divergent transcript [Source:HGNC Symbol;Acc:HGNC:50673]                           | 31  | 2.98 | 0.4174 | 7.1 | 9.3E-13 | 5.5E-12 |
| ENSG00000261762 | ENSG00000261762 | novel transcript, antisense to CHRNA5                                                    | 47  | 2.11 | 0.2954 | 7.1 | 9.1E-13 | 5.4E-12 |

|                 |                 |                                                                                                      |      |      |        |     |         |         |
|-----------------|-----------------|------------------------------------------------------------------------------------------------------|------|------|--------|-----|---------|---------|
| ENSG00000135318 | NT5E            | 5'-nucleotidase ecto [Source:HGNC Symbol;Acc:HGNC:8021]                                              | 520  | 0.59 | 0.0824 | 7.1 | 9.1E-13 | 5.3E-12 |
| ENSG00000125864 | BFSP1           | beaded filament structural protein 1 [Source:HGNC Symbol;Acc:HGNC:1040]                              | 84   | 1.48 | 0.2069 | 7.1 | 8.7E-13 | 5.1E-12 |
| ENSG00000174132 | FAM174A         | family with sequence similarity 174 member A [Source:HGNC Symbol;Acc:HGNC:24943]                     | 628  | 0.53 | 0.0744 | 7.2 | 8.5E-13 | 5.0E-12 |
| ENSG00000104369 | JPH1            | junctophilin 1 [Source:HGNC Symbol;Acc:HGNC:14201]                                                   | 164  | 1.04 | 0.1454 | 7.2 | 8.1E-13 | 4.8E-12 |
| ENSG00000167515 | TRAPPC2L        | trafficking protein particle complex 2 like [Source:HGNC Symbol;Acc:HGNC:30887]                      | 579  | 0.62 | 0.0859 | 7.2 | 7.9E-13 | 4.6E-12 |
| ENSG00000247596 | TWF2            | twinfilin actin binding protein 2 [Source:HGNC Symbol;Acc:HGNC:9621]                                 | 712  | 0.55 | 0.0767 | 7.2 | 6.9E-13 | 4.1E-12 |
| ENSG00000160233 | LRR3            | leucine rich repeat containing 3 [Source:HGNC Symbol;Acc:HGNC:14965]                                 | 137  | 1.15 | 0.1598 | 7.2 | 6.6E-13 | 3.9E-12 |
| ENSG00000177613 | CSTF2T          | cleavage stimulation factor subunit 2 tau variant [Source:HGNC Symbol;Acc:HGNC:17086]                | 540  | 0.63 | 0.0872 | 7.2 | 6.4E-13 | 3.8E-12 |
| ENSG00000184857 | TMEM186         | transmembrane protein 186 [Source:HGNC Symbol;Acc:HGNC:24530]                                        | 205  | 0.93 | 0.1295 | 7.2 | 6.1E-13 | 3.6E-12 |
| ENSG00000203650 | LINC01285       | long intergenic non-protein coding RNA 1285 [Source:HGNC Symbol;Acc:HGNC:50344]                      | 180  | 1.02 | 0.1409 | 7.2 | 5.9E-13 | 3.5E-12 |
| ENSG00000101292 | PROKR2          | prokineticin receptor 2 [Source:HGNC Symbol;Acc:HGNC:15836]                                          | 122  | 1.22 | 0.1694 | 7.2 | 5.7E-13 | 3.4E-12 |
| ENSG00000171700 | RGS19           | regulator of G protein signaling 19 [Source:HGNC Symbol;Acc:HGNC:13735]                              | 744  | 0.53 | 0.0733 | 7.2 | 5.5E-13 | 3.3E-12 |
| ENSG00000090238 | YPEL3           | yippee like 3 [Source:HGNC Symbol;Acc:HGNC:18327]                                                    | 137  | 1.20 | 0.1658 | 7.2 | 5.3E-13 | 3.1E-12 |
| ENSG00000244187 | TMEM141         | transmembrane protein 141 [Source:HGNC Symbol;Acc:HGNC:28211]                                        | 234  | 0.91 | 0.1254 | 7.2 | 5.2E-13 | 3.1E-12 |
| ENSG00000008086 | CDKL5           | cyclin dependent kinase like 5 [Source:HGNC Symbol;Acc:HGNC:11411]                                   | 114  | 1.30 | 0.1792 | 7.2 | 4.9E-13 | 2.9E-12 |
| ENSG00000105204 | DYRK1B          | dual specificity tyrosine phosphorylation regulated kinase 1B [Source:HGNC Symbol;Acc:HGNC:3092]     | 182  | 1.02 | 0.1402 | 7.2 | 4.4E-13 | 2.6E-12 |
| ENSG00000181817 | LSM10           | LSM10, U7 small nuclear RNA associated [Source:HGNC Symbol;Acc:HGNC:17562]                           | 711  | 0.51 | 0.0704 | 7.2 | 4.3E-13 | 2.6E-12 |
| ENSG00000185885 | IFITM1          | interferon induced transmembrane protein 1 [Source:HGNC Symbol;Acc:HGNC:5412]                        | 109  | 1.46 | 0.2010 | 7.2 | 4.2E-13 | 2.5E-12 |
| ENSG00000196123 | KIAA0895L       | KIAA0895 like [Source:HGNC Symbol;Acc:HGNC:34408]                                                    | 473  | 0.62 | 0.0848 | 7.3 | 4.1E-13 | 2.4E-12 |
| ENSG00000146242 | TPBG            | trophoblast glycoprotein [Source:HGNC Symbol;Acc:HGNC:12004]                                         | 241  | 0.86 | 0.1189 | 7.3 | 3.9E-13 | 2.3E-12 |
| ENSG00000107537 | PHYH            | phytanoyl-CoA 2-hydroxylase [Source:HGNC Symbol;Acc:HGNC:8940]                                       | 397  | 0.73 | 0.1004 | 7.3 | 3.9E-13 | 2.3E-12 |
| ENSG00000104093 | DMXL2           | Dmx like 2 [Source:HGNC Symbol;Acc:HGNC:2938]                                                        | 846  | 0.50 | 0.0691 | 7.3 | 3.8E-13 | 2.2E-12 |
| ENSG00000168569 | TMEM223         | transmembrane protein 223 [Source:HGNC Symbol;Acc:HGNC:28464]                                        | 295  | 0.79 | 0.1092 | 7.3 | 3.8E-13 | 2.2E-12 |
| ENSG00000235508 | RPS2P7          | ribosomal protein S2 pseudogene 7 [Source:HGNC Symbol;Acc:HGNC:15838]                                | 90   | 1.48 | 0.2035 | 7.3 | 3.4E-13 | 2.0E-12 |
| ENSG00000267254 | ZNF790-AS1      | ZNF790 antisense RNA 1 [Source:HGNC Symbol;Acc:HGNC:27617]                                           | 156  | 1.13 | 0.1546 | 7.3 | 3.3E-13 | 2.0E-12 |
| ENSG00000274213 | ENSG00000274213 | novel transcript                                                                                     | 74   | 1.66 | 0.2286 | 7.3 | 3.3E-13 | 2.0E-12 |
| ENSG00000005238 | FAM214B         | family with sequence similarity 214 member B [Source:HGNC Symbol;Acc:HGNC:25666]                     | 267  | 0.85 | 0.1160 | 7.3 | 2.9E-13 | 1.8E-12 |
| ENSG00000128011 | LRFN1           | leucine rich repeat and fibronectin type III domain containing 1 [Source:HGNC Symbol;Acc:HGNC:29290] | 207  | 0.96 | 0.1319 | 7.3 | 2.9E-13 | 1.7E-12 |
| ENSG00000188290 | HES4            | hes family bHLH transcription factor 4 [Source:HGNC Symbol;Acc:HGNC:24149]                           | 259  | 0.93 | 0.1274 | 7.3 | 2.8E-13 | 1.7E-12 |
| ENSG00000140993 | TIGD7           | tigger transposable element derived 7 [Source:HGNC Symbol;Acc:HGNC:18331]                            | 66   | 1.79 | 0.2444 | 7.3 | 2.5E-13 | 1.5E-12 |
| ENSG00000136111 | TBC1D4          | TBC1 domain family member 4 [Source:HGNC Symbol;Acc:HGNC:19165]                                      | 194  | 0.98 | 0.1342 | 7.3 | 2.4E-13 | 1.4E-12 |
| ENSG00000110871 | COQ5            | coenzyme Q5, methyltransferase [Source:HGNC Symbol;Acc:HGNC:28722]                                   | 546  | 0.60 | 0.0817 | 7.3 | 2.3E-13 | 1.4E-12 |
| ENSG00000111886 | WNT5B           | Wnt family member 5B [Source:HGNC Symbol;Acc:HGNC:16265]                                             | 128  | 1.31 | 0.1793 | 7.3 | 2.3E-13 | 1.4E-12 |
| ENSG00000102890 | ELMO3           | gulflumant and cell motility 3 [Source:HGNC Symbol;Acc:HGNC:17289]                                   | 231  | 0.90 | 0.1226 | 7.3 | 2.1E-13 | 1.3E-12 |
| ENSG00000175294 | CATSPER1        | cation channel sperm associated 1 [Source:HGNC Symbol;Acc:HGNC:17116]                                | 27   | 4.39 | 0.5975 | 7.3 | 2.1E-13 | 1.3E-12 |
| ENSG00000216588 | IGSF23          | immunoglobulin superfamily member 23 [Source:HGNC Symbol;Acc:HGNC:40040]                             | 55   | 2.09 | 0.2847 | 7.3 | 2.1E-13 | 1.2E-12 |
| ENSG00000023572 | GLRX2           | glutaredoxin 2 [Source:HGNC Symbol;Acc:HGNC:16065]                                                   | 487  | 0.62 | 0.0837 | 7.3 | 2.0E-13 | 1.2E-12 |
| ENSG00000272079 | ENSG00000272079 | novel transcript                                                                                     | 86   | 1.56 | 0.2123 | 7.3 | 2.0E-13 | 1.2E-12 |
| ENSG00000170382 | LRRN2           | leucine rich repeat neuronal 2 [Source:HGNC Symbol;Acc:HGNC:16914]                                   | 115  | 1.32 | 0.1790 | 7.4 | 1.9E-13 | 1.2E-12 |
| ENSG00000163297 | ANTXR2          | ANTXR cell adhesion molecule 2 [Source:HGNC Symbol;Acc:HGNC:21732]                                   | 121  | 1.34 | 0.1816 | 7.4 | 1.9E-13 | 1.2E-12 |
| ENSG00000205730 | ITPR1L2         | ITPRIP like 2 [Source:HGNC Symbol;Acc:HGNC:27257]                                                    | 2812 | 0.61 | 0.0829 | 7.4 | 1.8E-13 | 1.1E-12 |
| ENSG00000114698 | PLSCR4          | phospholipid scramblase 4 [Source:HGNC Symbol;Acc:HGNC:16497]                                        | 96   | 1.75 | 0.2383 | 7.4 | 1.8E-13 | 1.1E-12 |

|                 |            |                                                                                            |      |      |        |     |         |         |
|-----------------|------------|--------------------------------------------------------------------------------------------|------|------|--------|-----|---------|---------|
| ENSG00000151640 | DPYSL4     | dihydropyrimidinase like 4 [Source:HGNC Symbol;Acc:HGNC:3016]                              | 351  | 0.73 | 0.0988 | 7.4 | 1.7E-13 | 1.1E-12 |
| ENSG00000013016 | EHD3       | EH domain containing 3 [Source:HGNC Symbol;Acc:HGNC:3244]                                  | 463  | 0.66 | 0.0898 | 7.4 | 1.7E-13 | 1.0E-12 |
| ENSG00000161551 | ZNF577     | zinc finger protein 577 [Source:HGNC Symbol;Acc:HGNC:28673]                                | 493  | 0.64 | 0.0863 | 7.4 | 1.7E-13 | 1.0E-12 |
| ENSG00000184371 | CSF1       | colony stimulating factor 1 [Source:HGNC Symbol;Acc:HGNC:2432]                             | 165  | 1.16 | 0.1562 | 7.4 | 1.3E-13 | 8.0E-13 |
| ENSG00000280789 | PAGR1      | PAXIP1 associated glutamate rich protein 1 [Source:HGNC Symbol;Acc:HGNC:28707]             | 206  | 0.96 | 0.1294 | 7.4 | 1.2E-13 | 7.6E-13 |
| ENSG00000116729 | WLS        | Wnt ligand secretion mediator [Source:HGNC Symbol;Acc:HGNC:30238]                          | 727  | 0.53 | 0.0709 | 7.4 | 1.2E-13 | 7.4E-13 |
| ENSG00000101213 | PTK6       | protein tyrosine kinase 6 [Source:HGNC Symbol;Acc:HGNC:9617]                               | 369  | 0.74 | 0.1001 | 7.4 | 1.2E-13 | 7.3E-13 |
| ENSG00000104825 | NFKBIB     | NFKB inhibitor beta [Source:HGNC Symbol;Acc:HGNC:7798]                                     | 645  | 0.56 | 0.0758 | 7.4 | 1.2E-13 | 7.1E-13 |
| ENSG00000125730 | C3         | complement C3 [Source:HGNC Symbol;Acc:HGNC:1318]                                           | 108  | 1.38 | 0.1856 | 7.4 | 1.1E-13 | 6.8E-13 |
| ENSG00000172687 | ZNF738     | zinc finger protein 738 [Source:HGNC Symbol;Acc:HGNC:32469]                                | 254  | 0.91 | 0.1221 | 7.4 | 1.1E-13 | 6.7E-13 |
| ENSG00000026103 | FAS        | Fas cell surface death receptor [Source:HGNC Symbol;Acc:HGNC:11920]                        | 118  | 1.30 | 0.1751 | 7.4 | 1.1E-13 | 6.6E-13 |
| ENSG00000078403 | MLLT10     | MLLT10 histone lysine methyltransferase DOT1L cofactor [Source:HGNC Symbol;Acc:HGNC:16063] | 574  | 0.58 | 0.0779 | 7.4 | 1.1E-13 | 6.6E-13 |
| ENSG00000164219 | PGGT1B     | protein geranylgeranyltransferase type I subunit beta [Source:HGNC Symbol;Acc:HGNC:8895]   | 546  | 0.60 | 0.0810 | 7.4 | 1.0E-13 | 6.3E-13 |
| ENSG00000120725 | SIL1       | SIL1 nucleotide exchange factor [Source:HGNC Symbol;Acc:HGNC:24624]                        | 567  | 0.63 | 0.0843 | 7.4 | 9.7E-14 | 6.0E-13 |
| ENSG00000186777 | ZNF732     | zinc finger protein 732 [Source:HGNC Symbol;Acc:HGNC:37138]                                | 75   | 1.67 | 0.2232 | 7.5 | 8.0E-14 | 4.9E-13 |
| ENSG00000186076 | ENSG000001 | phosphoglycerate mutase 1 (brain) (PGAM1) pseudogene                                       | 296  | 0.83 | 0.1109 | 7.5 | 7.9E-14 | 4.9E-13 |
| ENSG00000227496 | ENSG000002 | novel transcript                                                                           | 40   | 2.81 | 0.3758 | 7.5 | 7.7E-14 | 4.8E-13 |
| ENSG00000198930 | CSAG1      | chondrosarcoma associated gene 1 [Source:HGNC Symbol;Acc:HGNC:24294]                       | 1053 | 0.51 | 0.0676 | 7.5 | 6.9E-14 | 4.3E-13 |
| ENSG00000169684 | CHRNA5     | cholinergic receptor nicotinic alpha 5 subunit [Source:HGNC Symbol;Acc:HGNC:1959]          | 66   | 1.81 | 0.2409 | 7.5 | 6.0E-14 | 3.7E-13 |
| ENSG00000188171 | ZNF626     | zinc finger protein 626 [Source:HGNC Symbol;Acc:HGNC:30461]                                | 30   | 4.12 | 0.5490 | 7.5 | 5.9E-14 | 3.7E-13 |
| ENSG00000182154 | MRPL41     | mitochondrial ribosomal protein L41 [Source:HGNC Symbol;Acc:HGNC:14492]                    | 2053 | 0.93 | 0.1237 | 7.5 | 5.5E-14 | 3.5E-13 |
| ENSG00000089486 | CDIP1      | cell death inducing p53 target 1 [Source:HGNC Symbol;Acc:HGNC:13234]                       | 97   | 1.45 | 0.1922 | 7.5 | 5.1E-14 | 3.2E-13 |
| ENSG00000177150 | FAM210A    | family with sequence similarity 210 member A [Source:HGNC Symbol;Acc:HGNC:28346]           | 523  | 0.62 | 0.0823 | 7.5 | 5.0E-14 | 3.2E-13 |
| ENSG00000162104 | ADCY9      | adenylate cyclase 9 [Source:HGNC Symbol;Acc:HGNC:240]                                      | 542  | 0.67 | 0.0888 | 7.5 | 4.7E-14 | 2.9E-13 |
| ENSG00000138613 | APH1B      | aph-1 homolog B, gamma-secretase subunit [Source:HGNC Symbol;Acc:HGNC:24080]               | 229  | 0.97 | 0.1283 | 7.5 | 4.7E-14 | 2.9E-13 |
| ENSG00000166130 | IKBIP      | IKKKB interacting protein [Source:HGNC Symbol;Acc:HGNC:26430]                              | 605  | 0.57 | 0.0761 | 7.5 | 4.5E-14 | 2.8E-13 |
| ENSG00000254087 | LYN        | LYN proto-oncogene, Src family tyrosine kinase [Source:HGNC Symbol;Acc:HGNC:6735]          | 689  | 0.61 | 0.0811 | 7.6 | 4.0E-14 | 2.5E-13 |
| ENSG00000013619 | MAMLD1     | mastermind like domain containing 1 [Source:HGNC Symbol;Acc:HGNC:2568]                     | 51   | 2.27 | 0.2997 | 7.6 | 4.0E-14 | 2.5E-13 |
| ENSG00000153774 | CFDP1      | craniofacial development protein 1 [Source:HGNC Symbol;Acc:HGNC:1873]                      | 641  | 0.57 | 0.0759 | 7.6 | 4.0E-14 | 2.5E-13 |
| ENSG00000124635 | H2BC11     | H2B clustered histone 11 [Source:HGNC Symbol;Acc:HGNC:4761]                                | 101  | 1.50 | 0.1981 | 7.6 | 3.5E-14 | 2.2E-13 |
| ENSG00000188566 | NDOR1      | NADPH dependent diflavin oxidoreductase 1 [Source:HGNC Symbol;Acc:HGNC:29838]              | 647  | 0.56 | 0.0744 | 7.6 | 3.5E-14 | 2.2E-13 |
| ENSG00000111846 | GCNT2      | glucosaminyl (N-acetyl) transferase 2 (I blood group) [Source:HGNC Symbol;Acc:HGNC:4204]   | 36   | 2.95 | 0.3887 | 7.6 | 3.5E-14 | 2.2E-13 |
| ENSG00000152256 | PDK1       | pyruvate dehydrogenase kinase 1 [Source:HGNC Symbol;Acc:HGNC:8809]                         | 270  | 0.89 | 0.1169 | 7.6 | 3.1E-14 | 2.0E-13 |
| ENSG00000153551 | CMTM7      | CKLF like MARVEL transmembrane domain containing 7 [Source:HGNC Symbol;Acc:HGNC:19178]     | 126  | 1.27 | 0.1675 | 7.6 | 3.0E-14 | 1.9E-13 |
| ENSG00000167967 | E4F1       | E4F transcription factor 1 [Source:HGNC Symbol;Acc:HGNC:3121]                              | 617  | 0.63 | 0.0830 | 7.6 | 2.9E-14 | 1.9E-13 |
| ENSG00000232310 | ENSG000002 | novel transcript                                                                           | 33   | 5.33 | 0.6992 | 7.6 | 2.4E-14 | 1.6E-13 |
| ENSG00000164136 | IL15       | interleukin 15 [Source:HGNC Symbol;Acc:HGNC:5977]                                          | 44   | 2.45 | 0.3206 | 7.6 | 2.3E-14 | 1.5E-13 |
| ENSG00000166484 | MAPK7      | mitogen-activated protein kinase 7 [Source:HGNC Symbol;Acc:HGNC:6880]                      | 556  | 0.62 | 0.0810 | 7.6 | 2.3E-14 | 1.5E-13 |
| ENSG00000120324 | PCDHB10    | protocadherin beta 10 [Source:HGNC Symbol;Acc:HGNC:8681]                                   | 45   | 2.52 | 0.3305 | 7.6 | 2.3E-14 | 1.5E-13 |
| ENSG00000169026 | SLC49A3    | solute carrier family 49 member 3 [Source:HGNC Symbol;Acc:HGNC:26177]                      | 205  | 1.02 | 0.1335 | 7.7 | 1.8E-14 | 1.1E-13 |
| ENSG00000120549 | KIAA1217   | KIAA1217 [Source:HGNC Symbol;Acc:HGNC:25428]                                               | 748  | 0.54 | 0.0707 | 7.7 | 1.7E-14 | 1.1E-13 |
| ENSG00000183114 | FAM43B     | family with sequence similarity 43 member B [Source:HGNC Symbol;Acc:HGNC:31791]            | 64   | 2.10 | 0.2732 | 7.7 | 1.7E-14 | 1.1E-13 |

|                 |          |                                                                                                            |      |      |        |     |         |         |
|-----------------|----------|------------------------------------------------------------------------------------------------------------|------|------|--------|-----|---------|---------|
| ENSG00000116396 | KCNC4    | potassium voltage-gated channel subfamily C member 4 [Source:HGNC Symbol;Acc:HGNC:6236]                    | 402  | 0.71 | 0.0924 | 7.7 | 1.6E-14 | 1.0E-13 |
| ENSG00000161791 | FMNL3    | formin like 3 [Source:HGNC Symbol;Acc:HGNC:23698]                                                          | 144  | 1.26 | 0.1641 | 7.7 | 1.5E-14 | 9.9E-14 |
| ENSG00000129194 | SOX15    | SRY-box transcription factor 15 [Source:HGNC Symbol;Acc:HGNC:11196]                                        | 129  | 1.29 | 0.1682 | 7.7 | 1.4E-14 | 9.0E-14 |
| ENSG00000216866 | RPS2P55  | ribosomal protein S2 pseudogene 55 [Source:HGNC Symbol;Acc:HGNC:36140]                                     | 153  | 1.21 | 0.1574 | 7.7 | 1.3E-14 | 8.7E-14 |
| ENSG00000103168 | TAF1C    | TATA-box binding protein associated factor, RNA polymerase I subunit C [Source:HGNC Symbol;Acc:HGNC:20647] | 589  | 0.60 | 0.0773 | 7.7 | 1.2E-14 | 7.9E-14 |
| ENSG00000196793 | ZNF239   | zinc finger protein 239 [Source:HGNC Symbol;Acc:HGNC:13031]                                                | 102  | 1.47 | 0.1901 | 7.7 | 1.1E-14 | 7.4E-14 |
| ENSG00000196724 | ZNF418   | zinc finger protein 418 [Source:HGNC Symbol;Acc:HGNC:20647]                                                | 246  | 1.02 | 0.1323 | 7.7 | 1.0E-14 | 6.6E-14 |
| ENSG00000008735 | MAPK8IP2 | mitogen-activated protein kinase 8 interacting protein 2 [Source:HGNC Symbol;Acc:HGNC:6883]                | 432  | 0.73 | 0.0940 | 7.7 | 9.8E-15 | 6.4E-14 |
| ENSG00000180818 | HOXC10   | homeobox C10 [Source:HGNC Symbol;Acc:HGNC:5122]                                                            | 289  | 0.95 | 0.1220 | 7.8 | 8.8E-15 | 5.7E-14 |
| ENSG00000198160 | MIER1    | MIER1 transcriptional regulator [Source:HGNC Symbol;Acc:HGNC:29657]                                        | 849  | 0.50 | 0.0650 | 7.8 | 8.3E-15 | 5.4E-14 |
| ENSG00000179674 | ARL14    | ADP ribosylation factor like GTPase 14 [Source:HGNC Symbol;Acc:HGNC:22974]                                 | 269  | 0.90 | 0.1162 | 7.8 | 7.8E-15 | 5.1E-14 |
| ENSG00000214975 | PPIAP29  | peptidylprolyl isomerase A pseudogene 29 [Source:HGNC Symbol;Acc:HGNC:43021]                               | 205  | 1.04 | 0.1332 | 7.8 | 7.0E-15 | 4.6E-14 |
| ENSG00000231205 | ZNF826P  | zinc finger protein 826, pseudogene [Source:HGNC Symbol;Acc:HGNC:33875]                                    | 75   | 1.81 | 0.2324 | 7.8 | 6.9E-15 | 4.5E-14 |
| ENSG00000132661 | NXT1     | nuclear transport factor 2 like export factor 1 [Source:HGNC Symbol;Acc:HGNC:15913]                        | 914  | 0.50 | 0.0643 | 7.8 | 6.9E-15 | 4.5E-14 |
| ENSG00000135346 | CGA      | glycoprotein hormones, alpha polypeptide [Source:HGNC Symbol;Acc:HGNC:1885]                                | 40   | 2.77 | 0.3558 | 7.8 | 6.7E-15 | 4.4E-14 |
| ENSG00000139289 | PHLDA1   | pleckstrin homology like domain family A member 1 [Source:HGNC Symbol;Acc:HGNC:8933]                       | 719  | 0.58 | 0.0747 | 7.8 | 6.5E-15 | 4.2E-14 |
| ENSG00000185189 | NRBP2    | nuclear receptor binding protein 2 [Source:HGNC Symbol;Acc:HGNC:19339]                                     | 677  | 0.57 | 0.0736 | 7.8 | 6.1E-15 | 4.0E-14 |
| ENSG00000177409 | SAMD9L   | sterile alpha motif domain containing 9 like [Source:HGNC Symbol;Acc:HGNC:1349]                            | 813  | 0.57 | 0.0731 | 7.8 | 5.5E-15 | 3.6E-14 |
| ENSG00000176261 | ZBTB8OS  | zinc finger and BTB domain containing 8 opposite strand [Source:HGNC Symbol;Acc:HGNC:24094]                | 771  | 0.54 | 0.0685 | 7.8 | 5.4E-15 | 3.6E-14 |
| ENSG00000269713 | NBPF9    | NBPF member 9 [Source:HGNC Symbol;Acc:HGNC:31991]                                                          | 460  | 0.70 | 0.0896 | 7.8 | 4.6E-15 | 3.0E-14 |
| ENSG00000165533 | TTC8     | tetratricopeptide repeat domain 8 [Source:HGNC Symbol;Acc:HGNC:20087]                                      | 370  | 0.77 | 0.0982 | 7.8 | 4.6E-15 | 3.0E-14 |
| ENSG00000103510 | KAT8     | lysine acetyltransferase 8 [Source:HGNC Symbol;Acc:HGNC:17933]                                             | 529  | 0.68 | 0.0863 | 7.8 | 4.4E-15 | 2.9E-14 |
| ENSG00000197548 | ATG7     | autophagy related 7 [Source:HGNC Symbol;Acc:HGNC:16935]                                                    | 775  | 0.55 | 0.0699 | 7.8 | 4.3E-15 | 2.8E-14 |
| ENSG00000168807 | SNTB2    | syntrophin beta 2 [Source:HGNC Symbol;Acc:HGNC:11169]                                                      | 671  | 0.60 | 0.0759 | 7.8 | 4.2E-15 | 2.8E-14 |
| ENSG00000103227 | LMF1     | lipase maturation factor 1 [Source:HGNC Symbol;Acc:HGNC:14154]                                             | 84   | 1.67 | 0.2121 | 7.9 | 3.9E-15 | 2.6E-14 |
| ENSG00000140743 | CDR2     | cerebellar degeneration related protein 2 [Source:HGNC Symbol;Acc:HGNC:1799]                               | 533  | 0.65 | 0.0826 | 7.9 | 3.6E-15 | 2.4E-14 |
| ENSG00000132635 | PCED1A   | PC-esterase domain containing 1A [Source:HGNC Symbol;Acc:HGNC:16212]                                       | 829  | 0.53 | 0.0665 | 7.9 | 2.7E-15 | 1.8E-14 |
| ENSG00000089199 | CHGB     | chromogranin B [Source:HGNC Symbol;Acc:HGNC:1930]                                                          | 77   | 1.75 | 0.2219 | 7.9 | 2.7E-15 | 1.8E-14 |
| ENSG00000176148 | TCP11L1  | t-complex 11 like 1 [Source:HGNC Symbol;Acc:HGNC:25655]                                                    | 604  | 0.66 | 0.0836 | 7.9 | 2.6E-15 | 1.7E-14 |
| ENSG00000197016 | ZNF470   | zinc finger protein 470 [Source:HGNC Symbol;Acc:HGNC:22220]                                                | 285  | 0.88 | 0.1110 | 7.9 | 2.5E-15 | 1.7E-14 |
| ENSG00000187535 | IFT140   | intraflagellar transport 140 [Source:HGNC Symbol;Acc:HGNC:29077]                                           | 396  | 0.78 | 0.0981 | 7.9 | 2.5E-15 | 1.6E-14 |
| ENSG00000031081 | ARHGAP31 | Rho GTPase activating protein 31 [Source:HGNC Symbol;Acc:HGNC:29216]                                       | 320  | 0.87 | 0.1096 | 7.9 | 2.4E-15 | 1.6E-14 |
| ENSG00000130827 | PLXNA3   | plexin A3 [Source:HGNC Symbol;Acc:HGNC:9101]                                                               | 830  | 0.54 | 0.0678 | 7.9 | 2.2E-15 | 1.5E-14 |
| ENSG00000140807 | NKD1     | NKD inhibitor of WNT signaling pathway 1 [Source:HGNC Symbol;Acc:HGNC:17045]                               | 70   | 1.92 | 0.2421 | 7.9 | 2.1E-15 | 1.4E-14 |
| ENSG00000118689 | FOXO3    | forkhead box O3 [Source:HGNC Symbol;Acc:HGNC:3821]                                                         | 757  | 0.57 | 0.0718 | 7.9 | 2.1E-15 | 1.4E-14 |
| ENSG00000255198 | SNHG9    | small nucleolar RNA host gene 9 [Source:HGNC Symbol;Acc:HGNC:33102]                                        | 205  | 1.15 | 0.1444 | 7.9 | 2.0E-15 | 1.3E-14 |
| ENSG00000188039 | NWD1     | NACHT and WD repeat domain containing 1 [Source:HGNC Symbol;Acc:HGNC:27619]                                | 54   | 6.84 | 0.8596 | 8.0 | 1.7E-15 | 1.2E-14 |
| ENSG00000197134 | ZNF257   | zinc finger protein 257 [Source:HGNC Symbol;Acc:HGNC:13498]                                                | 50   | 2.33 | 0.2921 | 8.0 | 1.6E-15 | 1.1E-14 |
| ENSG00000141448 | GATA6    | GATA binding protein 6 [Source:HGNC Symbol;Acc:HGNC:4174]                                                  | 44   | 2.66 | 0.3331 | 8.0 | 1.6E-15 | 1.0E-14 |
| ENSG00000069974 | RAB27A   | RAB27A, member RAS oncogene family [Source:HGNC Symbol;Acc:HGNC:9766]                                      | 261  | 0.97 | 0.1216 | 8.0 | 1.5E-15 | 1.0E-14 |
| ENSG00000151136 | BTBD11   | BTB domain containing 11 [Source:HGNC Symbol;Acc:HGNC:23844]                                               | 61   | 2.15 | 0.2701 | 8.0 | 1.5E-15 | 1.0E-14 |
| ENSG00000240342 | RPS2P5   | ribosomal protein S2 pseudogene 5 [Source:HGNC Symbol;Acc:HGNC:31386]                                      | 5667 | 0.55 | 0.0696 | 8.0 | 1.5E-15 | 1.0E-14 |

|                 |                 |                                                                                              |      |      |        |     |         |         |
|-----------------|-----------------|----------------------------------------------------------------------------------------------|------|------|--------|-----|---------|---------|
| ENSG00000091073 | DTX2            | deltex E3 ubiquitin ligase 2 [Source:HGNC Symbol;Acc:HGNC:15973]                             | 439  | 0.73 | 0.0909 | 8.0 | 1.5E-15 | 1.0E-14 |
| ENSG00000107643 | MAPK8           | mitogen-activated protein kinase 8 [Source:HGNC Symbol;Acc:HGNC:6881]                        | 511  | 0.68 | 0.0851 | 8.0 | 1.5E-15 | 9.9E-15 |
| ENSG00000247134 | ENSG00000247134 | novel transcript                                                                             | 32   | 3.76 | 0.4709 | 8.0 | 1.4E-15 | 9.8E-15 |
| ENSG00000113269 | RNF130          | ring finger protein 130 [Source:HGNC Symbol;Acc:HGNC:18280]                                  | 490  | 0.68 | 0.0856 | 8.0 | 1.4E-15 | 9.5E-15 |
| ENSG00000250303 | LINC02762       | long intergenic non-protein coding RNA 2762 [Source:HGNC Symbol;Acc:HGNC:27443]              | 57   | 2.21 | 0.2761 | 8.0 | 1.3E-15 | 8.8E-15 |
| ENSG00000137054 | POLR1E          | RNA polymerase I subunit E [Source:HGNC Symbol;Acc:HGNC:17631]                               | 788  | 0.55 | 0.0692 | 8.0 | 1.3E-15 | 8.8E-15 |
| ENSG00000183647 | ZNF530          | zinc finger protein 530 [Source:HGNC Symbol;Acc:HGNC:29297]                                  | 486  | 0.71 | 0.0883 | 8.0 | 1.1E-15 | 7.7E-15 |
| ENSG00000166770 | ZNF667-AS1      | ZNF667 antisense RNA 1 (head to head) [Source:HGNC Symbol;Acc:HGNC:44321]                    | 388  | 0.77 | 0.0955 | 8.0 | 1.0E-15 | 6.8E-15 |
| ENSG00000250312 | ZNF718          | zinc finger protein 718 [Source:HGNC Symbol;Acc:HGNC:26889]                                  | 219  | 1.03 | 0.1284 | 8.0 | 9.8E-16 | 6.7E-15 |
| ENSG00000102780 | DGKH            | diacylglycerol kinase eta [Source:HGNC Symbol;Acc:HGNC:2854]                                 | 284  | 0.90 | 0.1124 | 8.0 | 9.7E-16 | 6.6E-15 |
| ENSG00000107789 | MINPP1          | multiple inositol-polyphosphate phosphatase 1 [Source:HGNC Symbol;Acc:HGNC:7102]             | 843  | 0.53 | 0.0656 | 8.0 | 8.8E-16 | 6.0E-15 |
| ENSG00000103226 | NOMO3           | NODAL modulator 3 [Source:HGNC Symbol;Acc:HGNC:25242]                                        | 1080 | 0.52 | 0.0641 | 8.1 | 7.6E-16 | 5.2E-15 |
| ENSG00000188994 | ZNF292          | zinc finger protein 292 [Source:HGNC Symbol;Acc:HGNC:18410]                                  | 725  | 0.65 | 0.0809 | 8.1 | 7.3E-16 | 5.0E-15 |
| ENSG00000134070 | IRAK2           | interleukin 1 receptor associated kinase 2 [Source:HGNC Symbol;Acc:HGNC:6113]                | 177  | 1.14 | 0.1410 | 8.1 | 5.7E-16 | 3.9E-15 |
| ENSG00000138303 | ASCC1           | activating signal cointegrator 1 complex subunit 1 [Source:HGNC Symbol;Acc:HGNC:24268]       | 1078 | 0.51 | 0.0636 | 8.1 | 5.4E-16 | 3.8E-15 |
| ENSG00000131153 | GIN5            | GIN5 complex subunit 2 [Source:HGNC Symbol;Acc:HGNC:24575]                                   | 711  | 0.63 | 0.0775 | 8.1 | 5.3E-16 | 3.7E-15 |
| ENSG00000162065 | TBC1D24         | TBC1 domain family member 24 [Source:HGNC Symbol;Acc:HGNC:29203]                             | 141  | 1.30 | 0.1597 | 8.1 | 5.1E-16 | 3.5E-15 |
| ENSG00000105963 | ADAP1           | ArfGAP with dual PH domains 1 [Source:HGNC Symbol;Acc:HGNC:16486]                            | 528  | 0.69 | 0.0853 | 8.1 | 5.0E-16 | 3.4E-15 |
| ENSG00000152767 | FARP1           | FERM, ARH/RhoGEF and pleckstrin domain protein 1 [Source:HGNC Symbol;Acc:HGNC:3591]          | 248  | 0.98 | 0.1201 | 8.1 | 4.3E-16 | 3.0E-15 |
| ENSG00000064886 | CHI3L2          | chitinase 3 like 2 [Source:HGNC Symbol;Acc:HGNC:1933]                                        | 112  | 1.51 | 0.1858 | 8.1 | 4.1E-16 | 2.9E-15 |
| ENSG00000171451 | DSEL            | dermatan sulfate epimerase like [Source:HGNC Symbol;Acc:HGNC:18144]                          | 41   | 3.07 | 0.3779 | 8.1 | 4.0E-16 | 2.8E-15 |
| ENSG00000003436 | TFPI            | tissue factor pathway inhibitor [Source:HGNC Symbol;Acc:HGNC:11760]                          | 611  | 0.65 | 0.0801 | 8.1 | 3.9E-16 | 2.7E-15 |
| ENSG00000120896 | SORBS3          | sorbin and SH3 domain containing 3 [Source:HGNC Symbol;Acc:HGNC:30907]                       | 630  | 0.62 | 0.0767 | 8.1 | 3.8E-16 | 2.7E-15 |
| ENSG00000181938 | GIN5            | GIN5 complex subunit 3 [Source:HGNC Symbol;Acc:HGNC:25851]                                   | 269  | 0.96 | 0.1175 | 8.1 | 3.8E-16 | 2.6E-15 |
| ENSG00000276547 | PCDHGB5         | protocadherin gamma subfamily B, 5 [Source:HGNC Symbol;Acc:HGNC:8712]                        | 208  | 1.06 | 0.1300 | 8.1 | 3.7E-16 | 2.6E-15 |
| ENSG00000188227 | ZNF793          | zinc finger protein 793 [Source:HGNC Symbol;Acc:HGNC:33115]                                  | 167  | 1.24 | 0.1517 | 8.1 | 3.6E-16 | 2.5E-15 |
| ENSG00000151135 | TMEM263         | transmembrane protein 263 [Source:HGNC Symbol;Acc:HGNC:28281]                                | 822  | 0.56 | 0.0688 | 8.2 | 3.4E-16 | 2.4E-15 |
| ENSG00000197375 | SLC22A5         | solute carrier family 22 member 5 [Source:HGNC Symbol;Acc:HGNC:10969]                        | 898  | 0.54 | 0.0663 | 8.2 | 3.4E-16 | 2.3E-15 |
| ENSG00000183287 | CCBE1           | collagen and calcium binding EGF domains 1 [Source:HGNC Symbol;Acc:HGNC:29426]               | 40   | 2.95 | 0.3615 | 8.2 | 3.4E-16 | 2.3E-15 |
| ENSG00000167394 | ZNF668          | zinc finger protein 668 [Source:HGNC Symbol;Acc:HGNC:25821]                                  | 169  | 1.19 | 0.1455 | 8.2 | 2.6E-16 | 1.9E-15 |
| ENSG00000168286 | THAP11          | THAP domain containing 11 [Source:HGNC Symbol;Acc:HGNC:23194]                                | 571  | 0.69 | 0.0841 | 8.2 | 2.5E-16 | 1.8E-15 |
| ENSG00000126522 | ASL             | argininosuccinate lyase [Source:HGNC Symbol;Acc:HGNC:746]                                    | 573  | 0.66 | 0.0798 | 8.2 | 2.2E-16 | 1.5E-15 |
| ENSG00000138386 | NAB1            | NGFI-A binding protein 1 [Source:HGNC Symbol;Acc:HGNC:7626]                                  | 925  | 0.52 | 0.0634 | 8.2 | 2.2E-16 | 1.5E-15 |
| ENSG00000120322 | PCDH8           | protocadherin beta 8 [Source:HGNC Symbol;Acc:HGNC:8693]                                      | 34   | 4.55 | 0.5539 | 8.2 | 2.2E-16 | 1.5E-15 |
| ENSG00000183072 | NKX2-5          | NK2 homeobox 5 [Source:HGNC Symbol;Acc:HGNC:2488]                                            | 300  | 1.04 | 0.1265 | 8.2 | 2.1E-16 | 1.5E-15 |
| ENSG0000012983  | MAP4K5          | mitogen-activated protein kinase kinase kinase kinase 5 [Source:HGNC Symbol;Acc:HGNC:6867]   | 999  | 0.51 | 0.0624 | 8.2 | 2.0E-16 | 1.4E-15 |
| ENSG00000158373 | H2BC5           | H2B clustered histone 5 [Source:HGNC Symbol;Acc:HGNC:4747]                                   | 326  | 0.87 | 0.1061 | 8.2 | 1.9E-16 | 1.4E-15 |
| ENSG00000184635 | ZNF93           | zinc finger protein 93 [Source:HGNC Symbol;Acc:HGNC:13169]                                   | 115  | 1.48 | 0.1801 | 8.2 | 1.9E-16 | 1.3E-15 |
| ENSG00000164182 | NDUFAF2         | NADH:ubiquinone oxidoreductase complex assembly factor 2 [Source:HGNC Symbol;Acc:HGNC:28086] | 739  | 0.60 | 0.0730 | 8.2 | 1.9E-16 | 1.3E-15 |
| ENSG00000131019 | ULBP3           | UL16 binding protein 3 [Source:HGNC Symbol;Acc:HGNC:14895]                                   | 166  | 1.20 | 0.1460 | 8.2 | 1.9E-16 | 1.3E-15 |
| ENSG00000061938 | TNK2            | tyrosine kinase non receptor 2 [Source:HGNC Symbol;Acc:HGNC:19297]                           | 773  | 0.59 | 0.0722 | 8.2 | 1.8E-16 | 1.2E-15 |
| ENSG00000181894 | ZNF329          | zinc finger protein 329 [Source:HGNC Symbol;Acc:HGNC:14209]                                  | 366  | 0.81 | 0.0980 | 8.3 | 1.6E-16 | 1.1E-15 |



|                 |           |                                                                                               |      |      |        |     |         |         |
|-----------------|-----------|-----------------------------------------------------------------------------------------------|------|------|--------|-----|---------|---------|
| ENSG00000169826 | CSGALNACT | chondroitin sulfate N-acetylgalactosaminyltransferase 2 [Source:HGNC Symbol;Acc:HGNC:24292]   | 333  | 0.90 | 0.1087 | 8.3 | 1.6E-16 | 1.1E-15 |
| ENSG00000006704 | GTF2IRD1  | GTF2I repeat domain containing 1 [Source:HGNC Symbol;Acc:HGNC:4661]                           | 698  | 0.59 | 0.0717 | 8.3 | 1.5E-16 | 1.0E-15 |
| ENSG00000103528 | SYT17     | synaptotagmin 17 [Source:HGNC Symbol;Acc:HGNC:24119]                                          | 556  | 0.68 | 0.0820 | 8.3 | 1.4E-16 | 1.0E-15 |
| ENSG00000106605 | BLVRA     | biliverdin reductase A [Source:HGNC Symbol;Acc:HGNC:1062]                                     | 393  | 0.80 | 0.0968 | 8.3 | 1.4E-16 | 9.9E-16 |
| ENSG00000198538 | ZNF28     | zinc finger protein 28 [Source:HGNC Symbol;Acc:HGNC:13073]                                    | 466  | 0.73 | 0.0882 | 8.3 | 1.3E-16 | 9.4E-16 |
| ENSG00000168993 | CPLX1     | complexin 1 [Source:HGNC Symbol;Acc:HGNC:2309]                                                | 73   | 2.01 | 0.2431 | 8.3 | 1.3E-16 | 9.4E-16 |
| ENSG0000010539  | ZNF200    | zinc finger protein 200 [Source:HGNC Symbol;Acc:HGNC:12993]                                   | 289  | 0.91 | 0.1106 | 8.3 | 1.3E-16 | 9.3E-16 |
| ENSG00000122550 | KLHL7     | kelch like family member 7 [Source:HGNC Symbol;Acc:HGNC:15646]                                | 1010 | 0.55 | 0.0659 | 8.3 | 1.3E-16 | 9.2E-16 |
| ENSG00000100592 | DAAM1     | dishevelled associated activator of morphogenesis 1 [Source:HGNC Symbol;Acc:HGNC:18142]       | 999  | 0.50 | 0.0608 | 8.3 | 1.1E-16 | 7.9E-16 |
| ENSG00000149925 | ALDOA     | aldolase, fructose-bisphosphate A [Source:HGNC Symbol;Acc:HGNC:414]                           | 128  | 1.47 | 0.1768 | 8.3 | 1.1E-16 | 7.5E-16 |
| ENSG00000185798 | WDR53     | WD repeat domain 53 [Source:HGNC Symbol;Acc:HGNC:28786]                                       | 500  | 0.70 | 0.0840 | 8.3 | 1.1E-16 | 7.5E-16 |
| ENSG00000164744 | SUN3      | Sad1 and UNC84 domain containing 3 [Source:HGNC Symbol;Acc:HGNC:22429]                        | 142  | 1.45 | 0.1745 | 8.3 | 1.0E-16 | 7.4E-16 |
| ENSG00000182752 | PAPPA     | pappalysin 1 [Source:HGNC Symbol;Acc:HGNC:8602]                                               | 37   | 5.03 | 0.6059 | 8.3 | 1.0E-16 | 7.1E-16 |
| ENSG00000164086 | DUSP7     | dual specificity phosphatase 7 [Source:HGNC Symbol;Acc:HGNC:3073]                             | 580  | 0.67 | 0.0801 | 8.3 | 9.5E-17 | 6.8E-16 |
| ENSG00000253910 | PCDHGB2   | protocadherin gamma subfamily B, 2 [Source:HGNC Symbol;Acc:HGNC:8709]                         | 43   | 2.86 | 0.3442 | 8.3 | 9.5E-17 | 6.8E-16 |
| ENSG00000133302 | SLF1      | SMC5-SMC6 complex localization factor 1 [Source:HGNC Symbol;Acc:HGNC:25408]                   | 419  | 0.77 | 0.0923 | 8.3 | 9.2E-17 | 6.6E-16 |
| ENSG00000237517 | DGCR5     | DiGeorge syndrome critical region gene 5 [Source:HGNC Symbol;Acc:HGNC:16757]                  | 218  | 1.09 | 0.1312 | 8.3 | 8.2E-17 | 5.8E-16 |
| ENSG00000226564 | FTH1P20   | ferritin heavy chain 1 pseudogene 20 [Source:HGNC Symbol;Acc:HGNC:37639]                      | 345  | 0.88 | 0.1056 | 8.3 | 8.1E-17 | 5.8E-16 |
| ENSG00000168404 | MLKL      | mixed lineage kinase domain like pseudokinase [Source:HGNC Symbol;Acc:HGNC:26617]             | 372  | 0.92 | 0.1099 | 8.3 | 7.9E-17 | 5.7E-16 |
| ENSG00000186111 | PIP5K1C   | phosphatidylinositol-4-phosphate 5-kinase type 1 gamma [Source:HGNC Symbol;Acc:HGNC:8996]     | 563  | 0.71 | 0.0847 | 8.3 | 7.6E-17 | 5.5E-16 |
| ENSG00000162062 | TEDC2     | tubulin epsilon and delta complex 2 [Source:HGNC Symbol;Acc:HGNC:25849]                       | 394  | 0.80 | 0.0956 | 8.3 | 7.3E-17 | 5.2E-16 |
| ENSG00000052850 | ALX4      | ALX homeobox 4 [Source:HGNC Symbol;Acc:HGNC:450]                                              | 69   | 2.07 | 0.2481 | 8.4 | 6.7E-17 | 4.8E-16 |
| ENSG00000145919 | BOD1      | biorientation of chromosomes in cell division 1 [Source:HGNC Symbol;Acc:HGNC:25114]           | 913  | 0.56 | 0.0668 | 8.4 | 6.5E-17 | 4.7E-16 |
| ENSG00000179104 | TMTC2     | transmembrane O-mannosyltransferase targeting cadherins 2 [Source:HGNC Symbol;Acc:HGNC:25440] | 265  | 0.95 | 0.1133 | 8.4 | 6.3E-17 | 4.5E-16 |
| ENSG00000180071 | ANKRD18A  | ankyrin repeat domain 18A [Source:HGNC Symbol;Acc:HGNC:23643]                                 | 59   | 2.35 | 0.2806 | 8.4 | 5.7E-17 | 4.1E-16 |
| ENSG00000242612 | DECR2     | 2,4-dienoyl-CoA reductase 2 [Source:HGNC Symbol;Acc:HGNC:2754]                                | 130  | 1.42 | 0.1694 | 8.4 | 5.5E-17 | 4.0E-16 |
| ENSG00000165072 | MAMDC2    | MAM domain containing 2 [Source:HGNC Symbol;Acc:HGNC:23673]                                   | 254  | 1.05 | 0.1247 | 8.4 | 5.3E-17 | 3.8E-16 |
| ENSG00000182393 | IFNL1     | interferon lambda 1 [Source:HGNC Symbol;Acc:HGNC:18363]                                       | 51   | 2.56 | 0.3043 | 8.4 | 4.5E-17 | 3.3E-16 |
| ENSG00000107485 | GATA3     | GATA binding protein 3 [Source:HGNC Symbol;Acc:HGNC:4172]                                     | 735  | 0.59 | 0.0707 | 8.4 | 4.5E-17 | 3.2E-16 |
| ENSG00000117408 | IPO13     | importin 13 [Source:HGNC Symbol;Acc:HGNC:16853]                                               | 825  | 0.55 | 0.0660 | 8.4 | 4.4E-17 | 3.2E-16 |
| ENSG00000112276 | BVES      | blood vessel epicardial substance [Source:HGNC Symbol;Acc:HGNC:1152]                          | 142  | 1.37 | 0.1630 | 8.4 | 4.4E-17 | 3.2E-16 |
| ENSG0000018408  | WWTR1     | WW domain containing transcription regulator 1 [Source:HGNC Symbol;Acc:HGNC:24042]            | 939  | 0.55 | 0.0655 | 8.4 | 4.2E-17 | 3.1E-16 |
| ENSG00000174099 | MSRB3     | methionine sulfoxide reductase B3 [Source:HGNC Symbol;Acc:HGNC:27375]                         | 151  | 1.33 | 0.1579 | 8.4 | 4.0E-17 | 2.9E-16 |
| ENSG00000006740 | ARHGAP44  | Rho GTPase activating protein 44 [Source:HGNC Symbol;Acc:HGNC:29096]                          | 400  | 0.84 | 0.0994 | 8.4 | 3.7E-17 | 2.7E-16 |
| ENSG00000196437 | ZNF569    | zinc finger protein 569 [Source:HGNC Symbol;Acc:HGNC:24737]                                   | 172  | 1.23 | 0.1456 | 8.4 | 3.4E-17 | 2.5E-16 |
| ENSG00000112208 | BAG2      | BAG cochaperone 2 [Source:HGNC Symbol;Acc:HGNC:938]                                           | 215  | 1.09 | 0.1295 | 8.4 | 3.3E-17 | 2.4E-16 |
| ENSG00000256683 | ZNF350    | zinc finger protein 350 [Source:HGNC Symbol;Acc:HGNC:16656]                                   | 336  | 0.96 | 0.1137 | 8.4 | 3.3E-17 | 2.4E-16 |
| ENSG00000104856 | RELB      | RELB proto-oncogene, NF-kB subunit [Source:HGNC Symbol;Acc:HGNC:9956]                         | 504  | 0.71 | 0.0846 | 8.4 | 3.1E-17 | 2.3E-16 |
| ENSG00000082074 | FYB1      | FYN binding protein 1 [Source:HGNC Symbol;Acc:HGNC:4036]                                      | 115  | 1.70 | 0.2012 | 8.4 | 3.1E-17 | 2.3E-16 |
| ENSG00000185947 | ZNF267    | zinc finger protein 267 [Source:HGNC Symbol;Acc:HGNC:13060]                                   | 181  | 1.21 | 0.1428 | 8.5 | 2.9E-17 | 2.1E-16 |
| ENSG00000115042 | FAHD2A    | fumarylacetoacetate hydrolase domain containing 2A [Source:HGNC Symbol;Acc:HGNC:24252]        | 607  | 0.66 | 0.0778 | 8.5 | 2.8E-17 | 2.0E-16 |
| ENSG00000118276 | B4GALT6   | beta-1,4-galactosyltransferase 6 [Source:HGNC Symbol;Acc:HGNC:929]                            | 499  | 0.71 | 0.0838 | 8.5 | 2.7E-17 | 2.0E-16 |

|                 |                 |                                                                                                                   |       |      |        |     |         |         |
|-----------------|-----------------|-------------------------------------------------------------------------------------------------------------------|-------|------|--------|-----|---------|---------|
| ENSG00000173171 | MTX1            | metaxin 1 [Source:HGNC Symbol;Acc:HGNC:7504]                                                                      | 984   | 0.55 | 0.0654 | 8.5 | 2.6E-17 | 1.9E-16 |
| ENSG00000170832 | USP32           | ubiquitin specific peptidase 32 [Source:HGNC Symbol;Acc:HGNC:19143]                                               | 1206  | 0.51 | 0.0603 | 8.5 | 2.5E-17 | 1.8E-16 |
| ENSG00000145780 | FEM1C           | fem-1 homolog C [Source:HGNC Symbol;Acc:HGNC:16933]                                                               | 763   | 0.63 | 0.0739 | 8.5 | 2.4E-17 | 1.8E-16 |
| ENSG00000228981 | ENSG00000228981 | ribosomal protein S2 (RPS2) pseudogene                                                                            | 161   | 1.26 | 0.1491 | 8.5 | 2.4E-17 | 1.8E-16 |
| ENSG00000197956 | S100A6          | S100 calcium binding protein A6 [Source:HGNC Symbol;Acc:HGNC:10496]                                               | 12359 | 0.50 | 0.0593 | 8.5 | 2.1E-17 | 1.5E-16 |
| ENSG00000185904 | LINC00839       | long intergenic non-protein coding RNA 839 [Source:HGNC Symbol;Acc:HGNC:28269]                                    | 93    | 1.73 | 0.2036 | 8.5 | 2.0E-17 | 1.4E-16 |
| ENSG00000164105 | SAP30           | Sin3A associated protein 30 [Source:HGNC Symbol;Acc:HGNC:10532]                                                   | 139   | 1.42 | 0.1668 | 8.5 | 1.8E-17 | 1.4E-16 |
| ENSG00000106211 | HSPB1           | heat shock protein family B (small) member 1 [Source:HGNC Symbol;Acc:HGNC:5246]                                   | 45445 | 0.85 | 0.1003 | 8.5 | 1.7E-17 | 1.3E-16 |
| ENSG00000253953 | PCDHGB4         | protocadherin gamma subfamily B, 4 [Source:HGNC Symbol;Acc:HGNC:8711]                                             | 242   | 1.20 | 0.1413 | 8.5 | 1.6E-17 | 1.2E-16 |
| ENSG00000112246 | SIM1            | SIM bHLH transcription factor 1 [Source:HGNC Symbol;Acc:HGNC:10882]                                               | 67    | 2.14 | 0.2508 | 8.5 | 1.5E-17 | 1.1E-16 |
| ENSG00000168096 | ANKS3           | ankyrin repeat and sterile alpha motif domain containing 3 [Source:HGNC Symbol;Acc:HGNC:29422]                    | 213   | 1.11 | 0.1299 | 8.5 | 1.5E-17 | 1.1E-16 |
| ENSG00000164970 | FAM219A         | family with sequence similarity 219 member A [Source:HGNC Symbol;Acc:HGNC:19920]                                  | 393   | 0.88 | 0.1033 | 8.5 | 1.5E-17 | 1.1E-16 |
| ENSG00000127554 | GFER            | growth factor, augments liver regeneration [Source:HGNC Symbol;Acc:HGNC:4236]                                     | 265   | 1.00 | 0.1166 | 8.5 | 1.3E-17 | 1.0E-16 |
| ENSG00000111885 | MAN1A1          | mannosidase alpha class 1A member 1 [Source:HGNC Symbol;Acc:HGNC:6821]                                            | 55    | 2.50 | 0.2925 | 8.5 | 1.3E-17 | 9.9E-17 |
| ENSG00000268858 | ENSG00000268858 | novel transcript, antisense to ABHD16B                                                                            | 188   | 1.20 | 0.1408 | 8.5 | 1.3E-17 | 9.8E-17 |
| ENSG00000232442 | MHENCRC         | melanoma highly expressed competing endogenous lncRNA for miR-425 and miR-489 [Source:HGNC Symbol;Acc:HGNC:23244] | 111   | 1.60 | 0.1868 | 8.5 | 1.3E-17 | 9.5E-17 |
| ENSG00000176293 | ZNF135          | zinc finger protein 135 [Source:HGNC Symbol;Acc:HGNC:12919]                                                       | 303   | 0.98 | 0.1142 | 8.5 | 1.3E-17 | 9.3E-17 |
| ENSG00000169189 | NSMCE1          | NSE1 homolog, SMC5-SMC6 complex component [Source:HGNC Symbol;Acc:HGNC:29897]                                     | 410   | 0.83 | 0.0972 | 8.5 | 1.2E-17 | 9.3E-17 |
| ENSG00000136514 | RTP4            | receptor transporter protein 4 [Source:HGNC Symbol;Acc:HGNC:23992]                                                | 108   | 1.61 | 0.1879 | 8.6 | 1.2E-17 | 8.8E-17 |
| ENSG00000187955 | COL14A1         | collagen type XIV alpha 1 chain [Source:HGNC Symbol;Acc:HGNC:2191]                                                | 38    | 3.58 | 0.4170 | 8.6 | 9.5E-18 | 7.1E-17 |
| ENSG00000156858 | PRR14           | proline rich 14 [Source:HGNC Symbol;Acc:HGNC:28458]                                                               | 336   | 0.89 | 0.1037 | 8.6 | 8.1E-18 | 6.1E-17 |
| ENSG00000110057 | UNC93B1         | unc-93 homolog B1, TLR signaling regulator [Source:HGNC Symbol;Acc:HGNC:13481]                                    | 671   | 0.67 | 0.0779 | 8.6 | 7.7E-18 | 5.8E-17 |
| ENSG00000151692 | RNF144A         | ring finger protein 144A [Source:HGNC Symbol;Acc:HGNC:20457]                                                      | 208   | 1.13 | 0.1311 | 8.6 | 7.4E-18 | 5.6E-17 |
| ENSG00000151689 | INPP1           | inositol polyphosphate-1-phosphatase [Source:HGNC Symbol;Acc:HGNC:6071]                                           | 500   | 0.73 | 0.0842 | 8.6 | 6.3E-18 | 4.8E-17 |
| ENSG00000104756 | KCTD9           | potassium channel tetramerization domain containing 9 [Source:HGNC Symbol;Acc:HGNC:22401]                         | 986   | 0.55 | 0.0633 | 8.6 | 5.9E-18 | 4.5E-17 |
| ENSG00000167513 | CDT1            | chromatin licensing and DNA replication factor 1 [Source:HGNC Symbol;Acc:HGNC:24576]                              | 720   | 0.61 | 0.0707 | 8.6 | 5.8E-18 | 4.4E-17 |
| ENSG00000080608 | PUM3            | pumilio RNA binding family member 3 [Source:HGNC Symbol;Acc:HGNC:29676]                                           | 1251  | 0.51 | 0.0588 | 8.6 | 5.6E-18 | 4.3E-17 |
| ENSG00000152778 | IFIT5           | interferon induced protein with tetratricopeptide repeats 5 [Source:HGNC Symbol;Acc:HGNC:13328]                   | 926   | 0.55 | 0.0632 | 8.6 | 5.2E-18 | 4.0E-17 |
| ENSG00000099256 | PRTFDC1         | phosphoribosyl transferase domain containing 1 [Source:HGNC Symbol;Acc:HGNC:23333]                                | 651   | 0.68 | 0.0782 | 8.7 | 5.0E-18 | 3.8E-17 |
| ENSG00000162894 | FCMR            | Fc fragment of IgM receptor [Source:HGNC Symbol;Acc:HGNC:14315]                                                   | 99    | 1.71 | 0.1972 | 8.7 | 4.7E-18 | 3.6E-17 |
| ENSG00000174943 | KCTD13          | potassium channel tetramerization domain containing 13 [Source:HGNC Symbol;Acc:HGNC:22234]                        | 303   | 1.00 | 0.1154 | 8.7 | 4.7E-18 | 3.6E-17 |
| ENSG00000183688 | RFLNB           | refilin B [Source:HGNC Symbol;Acc:HGNC:28705]                                                                     | 51    | 2.72 | 0.3135 | 8.7 | 4.5E-18 | 3.4E-17 |
| ENSG00000187239 | FNBP1           | formin binding protein 1 [Source:HGNC Symbol;Acc:HGNC:17069]                                                      | 950   | 0.57 | 0.0654 | 8.7 | 4.4E-18 | 3.4E-17 |
| ENSG00000131759 | RARA            | retinoic acid receptor alpha [Source:HGNC Symbol;Acc:HGNC:9864]                                                   | 329   | 0.92 | 0.1062 | 8.7 | 4.2E-18 | 3.2E-17 |
| ENSG00000171303 | KCNK3           | potassium two pore domain channel subfamily K member 3 [Source:HGNC Symbol;Acc:HGNC:6278]                         | 38    | 3.73 | 0.4291 | 8.7 | 3.9E-18 | 3.0E-17 |
| ENSG00000131791 | PRKAB2          | protein kinase AMP-activated non-catalytic subunit beta 2 [Source:HGNC Symbol;Acc:HGNC:9379]                      | 1147  | 0.50 | 0.0580 | 8.7 | 3.9E-18 | 3.0E-17 |
| ENSG00000143476 | DTL             | denticleless E3 ubiquitin protein ligase homolog [Source:HGNC Symbol;Acc:HGNC:30288]                              | 820   | 0.58 | 0.0668 | 8.7 | 3.7E-18 | 2.8E-17 |
| ENSG00000134590 | RTL8C           | retrotransposon Gag like 8C [Source:HGNC Symbol;Acc:HGNC:2569]                                                    | 1174  | 0.50 | 0.0576 | 8.7 | 3.4E-18 | 2.6E-17 |
| ENSG00000217094 | PPIAP31         | peptidylprolyl isomerase A pseudogene 31 [Source:HGNC Symbol;Acc:HGNC:44962]                                      | 397   | 0.86 | 0.0982 | 8.7 | 2.8E-18 | 2.1E-17 |
| ENSG00000067798 | NAV3            | neuron navigator 3 [Source:HGNC Symbol;Acc:HGNC:15998]                                                            | 280   | 1.08 | 0.1242 | 8.7 | 2.8E-18 | 2.1E-17 |
| ENSG00000188215 | DCUN1D3         | defective in cullin neddylation 1 domain containing 3 [Source:HGNC Symbol;Acc:HGNC:28734]                         | 540   | 0.72 | 0.0822 | 8.7 | 2.4E-18 | 1.8E-17 |
| ENSG00000156873 | PHKG2           | phosphorylase kinase catalytic subunit gamma 2 [Source:HGNC Symbol;Acc:HGNC:8931]                                 | 426   | 0.87 | 0.0996 | 8.7 | 2.2E-18 | 1.7E-17 |

|                 |         |                                                                                             |      |      |        |     |         |         |
|-----------------|---------|---------------------------------------------------------------------------------------------|------|------|--------|-----|---------|---------|
| ENSG00000205352 | PRR13   | proline rich 13 [Source:HGNC Symbol;Acc:HGNC:24528]                                         | 861  | 0.57 | 0.0649 | 8.8 | 2.1E-18 | 1.6E-17 |
| ENSG00000158445 | KCNB1   | potassium voltage-gated channel subfamily B member 1 [Source:HGNC Symbol;Acc:HGNC:6231]     | 912  | 0.58 | 0.0668 | 8.8 | 2.1E-18 | 1.6E-17 |
| ENSG00000166073 | GPR176  | G protein-coupled receptor 176 [Source:HGNC Symbol;Acc:HGNC:32370]                          | 174  | 1.29 | 0.1472 | 8.8 | 2.1E-18 | 1.6E-17 |
| ENSG00000162496 | DHRS3   | dehydrogenase/reductase 3 [Source:HGNC Symbol;Acc:HGNC:17693]                               | 704  | 0.63 | 0.0720 | 8.8 | 1.9E-18 | 1.5E-17 |
| ENSG00000196372 | ASB13   | ankyrin repeat and SOCS box containing 13 [Source:HGNC Symbol;Acc:HGNC:19765]               | 310  | 0.95 | 0.1078 | 8.8 | 1.9E-18 | 1.4E-17 |
| ENSG00000170791 | CHCHD7  | coiled-coil-helix-coiled-coil-helix domain containing 7 [Source:HGNC Symbol;Acc:HGNC:28314] | 520  | 0.76 | 0.0871 | 8.8 | 1.8E-18 | 1.4E-17 |
| ENSG00000169258 | GPRIN1  | G protein regulated inducer of neurite outgrowth 1 [Source:HGNC Symbol;Acc:HGNC:24835]      | 331  | 0.90 | 0.1025 | 8.8 | 1.8E-18 | 1.4E-17 |
| ENSG00000278318 | ZNF229  | zinc finger protein 229 [Source:HGNC Symbol;Acc:HGNC:13022]                                 | 420  | 0.82 | 0.0930 | 8.8 | 1.6E-18 | 1.2E-17 |
| ENSG00000169410 | PTPN9   | protein tyrosine phosphatase non-receptor type 9 [Source:HGNC Symbol;Acc:HGNC:9661]         | 886  | 0.57 | 0.0649 | 8.8 | 1.5E-18 | 1.2E-17 |
| ENSG00000175354 | PTPN2   | protein tyrosine phosphatase non-receptor type 2 [Source:HGNC Symbol;Acc:HGNC:9650]         | 1038 | 0.55 | 0.0629 | 8.8 | 1.5E-18 | 1.2E-17 |
| ENSG00000184985 | SORCS2  | sortilin related VPS10 domain containing receptor 2 [Source:HGNC Symbol;Acc:HGNC:16698]     | 194  | 1.21 | 0.1379 | 8.8 | 1.3E-18 | 1.0E-17 |
| ENSG00000188677 | PARVB   | parvin beta [Source:HGNC Symbol;Acc:HGNC:14653]                                             | 183  | 1.23 | 0.1396 | 8.8 | 1.2E-18 | 9.4E-18 |
| ENSG00000143486 | EIF2D   | eukaryotic translation initiation factor 2D [Source:HGNC Symbol;Acc:HGNC:6583]              | 1082 | 0.52 | 0.0591 | 8.8 | 1.1E-18 | 8.9E-18 |
| ENSG00000117385 | P3H1    | prolyl 3-hydroxylase 1 [Source:HGNC Symbol;Acc:HGNC:19316]                                  | 598  | 0.68 | 0.0770 | 8.8 | 1.1E-18 | 8.4E-18 |
| ENSG00000081059 | TCF7    | transcription factor 7 [Source:HGNC Symbol;Acc:HGNC:11639]                                  | 263  | 1.05 | 0.1185 | 8.8 | 1.1E-18 | 8.3E-18 |
| ENSG00000184939 | ZFP90   | ZFP90 zinc finger protein [Source:HGNC Symbol;Acc:HGNC:23329]                               | 518  | 0.74 | 0.0834 | 8.8 | 9.5E-19 | 7.4E-18 |
| ENSG00000153786 | ZDHHC7  | zinc finger DHHC-type palmitoyltransferase 7 [Source:HGNC Symbol;Acc:HGNC:18459]            | 1015 | 0.56 | 0.0630 | 8.8 | 9.2E-19 | 7.2E-18 |
| ENSG00000165632 | TAF3    | TATA-box binding protein associated factor 3 [Source:HGNC Symbol;Acc:HGNC:17303]            | 267  | 1.07 | 0.1213 | 8.9 | 7.8E-19 | 6.2E-18 |
| ENSG00000204991 | SPIRE2  | spire type actin nucleation factor 2 [Source:HGNC Symbol;Acc:HGNC:30623]                    | 214  | 1.20 | 0.1351 | 8.9 | 7.2E-19 | 5.7E-18 |
| ENSG00000137760 | ALKBH8  | alkB homolog 8, tRNA methyltransferase [Source:HGNC Symbol;Acc:HGNC:25189]                  | 471  | 0.76 | 0.0856 | 8.9 | 7.2E-19 | 5.7E-18 |
| ENSG00000196116 | TDRD7   | tudor domain containing 7 [Source:HGNC Symbol;Acc:HGNC:30831]                               | 806  | 0.62 | 0.0696 | 8.9 | 5.6E-19 | 4.4E-18 |
| ENSG00000140323 | DISP2   | dispatched RND transporter family member 2 [Source:HGNC Symbol;Acc:HGNC:19712]              | 191  | 1.30 | 0.1456 | 8.9 | 5.4E-19 | 4.3E-18 |
| ENSG00000197614 | MFAP5   | microfibril associated protein 5 [Source:HGNC Symbol;Acc:HGNC:29673]                        | 1156 | 0.52 | 0.0582 | 8.9 | 5.2E-19 | 4.2E-18 |
| ENSG00000148481 | MINDY3  | MINDY lysine 48 deubiquitinase 3 [Source:HGNC Symbol;Acc:HGNC:23578]                        | 352  | 0.92 | 0.1038 | 8.9 | 5.2E-19 | 4.1E-18 |
| ENSG00000165568 | AKR1E2  | aldo-keto reductase family 1 member E2 [Source:HGNC Symbol;Acc:HGNC:23437]                  | 127  | 1.59 | 0.1786 | 8.9 | 4.8E-19 | 3.8E-18 |
| ENSG00000187800 | PEAR1   | platelet endothelial aggregation receptor 1 [Source:HGNC Symbol;Acc:HGNC:33631]             | 40   | 4.30 | 0.4824 | 8.9 | 4.6E-19 | 3.6E-18 |
| ENSG00000072163 | LIMS2   | LIM zinc finger domain containing 2 [Source:HGNC Symbol;Acc:HGNC:16084]                     | 174  | 1.31 | 0.1465 | 8.9 | 4.5E-19 | 3.6E-18 |
| ENSG00000170145 | SIK2    | salt inducible kinase 2 [Source:HGNC Symbol;Acc:HGNC:21680]                                 | 924  | 0.61 | 0.0680 | 8.9 | 4.5E-19 | 3.6E-18 |
| ENSG00000107731 | UNC5B   | unc-5 netrin receptor B [Source:HGNC Symbol;Acc:HGNC:12568]                                 | 340  | 0.96 | 0.1073 | 8.9 | 4.5E-19 | 3.6E-18 |
| ENSG00000064651 | SLC12A2 | solute carrier family 12 member 2 [Source:HGNC Symbol;Acc:HGNC:10911]                       | 845  | 0.60 | 0.0676 | 8.9 | 4.4E-19 | 3.5E-18 |
| ENSG00000047578 | KATNIP  | katanin interacting protein [Source:HGNC Symbol;Acc:HGNC:29068]                             | 464  | 0.80 | 0.0902 | 8.9 | 4.4E-19 | 3.5E-18 |
| ENSG00000111196 | MAGOHB  | mago homolog B, exon junction complex subunit [Source:HGNC Symbol;Acc:HGNC:25504]           | 765  | 0.62 | 0.0693 | 8.9 | 4.2E-19 | 3.3E-18 |
| ENSG00000169184 | MN1     | MN1 proto-oncogene, transcriptional regulator [Source:HGNC Symbol;Acc:HGNC:7180]            | 60   | 2.44 | 0.2727 | 8.9 | 4.2E-19 | 3.3E-18 |
| ENSG00000084731 | KIF3C   | kinesin family member 3C [Source:HGNC Symbol;Acc:HGNC:6321]                                 | 367  | 1.02 | 0.1140 | 8.9 | 4.0E-19 | 3.2E-18 |
| ENSG00000110013 | SIAE    | sialic acid acetyltransferase [Source:HGNC Symbol;Acc:HGNC:18187]                           | 400  | 0.84 | 0.0935 | 8.9 | 3.9E-19 | 3.1E-18 |
| ENSG00000177932 | ZNF354C | zinc finger protein 354C [Source:HGNC Symbol;Acc:HGNC:16736]                                | 151  | 1.43 | 0.1592 | 9.0 | 3.3E-19 | 2.6E-18 |
| ENSG00000066697 | MSANTD3 | Myb/SANT DNA binding domain containing 3 [Source:HGNC Symbol;Acc:HGNC:23370]                | 638  | 0.67 | 0.0750 | 9.0 | 3.2E-19 | 2.6E-18 |
| ENSG00000245680 | ZNF585B | zinc finger protein 585B [Source:HGNC Symbol;Acc:HGNC:30948]                                | 77   | 2.08 | 0.2319 | 9.0 | 3.1E-19 | 2.5E-18 |
| ENSG00000183098 | GPC6    | glypican 6 [Source:HGNC Symbol;Acc:HGNC:4454]                                               | 41   | 3.74 | 0.4166 | 9.0 | 2.9E-19 | 2.3E-18 |
| ENSG00000108771 | DHX58   | DExH-box helicase 58 [Source:HGNC Symbol;Acc:HGNC:29517]                                    | 342  | 0.91 | 0.1017 | 9.0 | 2.6E-19 | 2.1E-18 |
| ENSG00000059691 | GATB    | glutamyl-tRNA amidotransferase subunit B [Source:HGNC Symbol;Acc:HGNC:8849]                 | 506  | 0.82 | 0.0913 | 9.0 | 2.6E-19 | 2.1E-18 |
| ENSG00000188827 | SLX4    | SLX4 structure-specific endonuclease subunit [Source:HGNC Symbol;Acc:HGNC:23845]            | 458  | 0.81 | 0.0903 | 9.0 | 2.5E-19 | 2.0E-18 |

|                 |            |                                                                                                  |      |      |        |     |         |         |
|-----------------|------------|--------------------------------------------------------------------------------------------------|------|------|--------|-----|---------|---------|
| ENSG00000188130 | MAPK12     | mitogen-activated protein kinase 12 [Source:HGNC Symbol;Acc:HGNC:6874]                           | 400  | 0.86 | 0.0959 | 9.0 | 2.4E-19 | 1.9E-18 |
| ENSG00000173517 | PEAK1      | pseudopodium enriched atypical kinase 1 [Source:HGNC Symbol;Acc:HGNC:29431]                      | 693  | 0.64 | 0.0714 | 9.0 | 2.1E-19 | 1.7E-18 |
| ENSG00000187522 | HSPA14     | heat shock protein family A (Hsp70) member 14 [Source:HGNC Symbol;Acc:HGNC:29526]                | 247  | 1.10 | 0.1226 | 9.0 | 2.0E-19 | 1.6E-18 |
| ENSG00000136378 | ADAMTS7    | ADAM metalloproteinase with thrombospondin type 1 motif 7 [Source:HGNC Symbol;Acc:HGNC:223]      | 128  | 1.54 | 0.1709 | 9.0 | 1.9E-19 | 1.6E-18 |
| ENSG0000010270  | STARD3NL   | STARD3 N-terminal like [Source:HGNC Symbol;Acc:HGNC:19169]                                       | 1045 | 0.56 | 0.0625 | 9.0 | 1.8E-19 | 1.4E-18 |
| ENSG00000120800 | UTP20      | UTP20 small subunit processome component [Source:HGNC Symbol;Acc:HGNC:17897]                     | 1089 | 0.53 | 0.0587 | 9.0 | 1.6E-19 | 1.3E-18 |
| ENSG00000103034 | NDRG4      | NDRG family member 4 [Source:HGNC Symbol;Acc:HGNC:14466]                                         | 325  | 0.95 | 0.1054 | 9.0 | 1.6E-19 | 1.3E-18 |
| ENSG00000106399 | RPA3       | replication protein A3 [Source:HGNC Symbol;Acc:HGNC:10291]                                       | 1225 | 0.52 | 0.0580 | 9.0 | 1.6E-19 | 1.3E-18 |
| ENSG00000172465 | TCEAL1     | transcription elongation factor A like 1 [Source:HGNC Symbol;Acc:HGNC:11616]                     | 301  | 0.97 | 0.1076 | 9.0 | 1.6E-19 | 1.3E-18 |
| ENSG00000179954 | SSC5D      | scavenger receptor cysteine rich family member with 5 domains [Source:HGNC Symbol;Acc:HGNC:2664] | 49   | 2.98 | 0.3292 | 9.0 | 1.5E-19 | 1.2E-18 |
| ENSG00000062582 | MRPS24     | mitochondrial ribosomal protein S24 [Source:HGNC Symbol;Acc:HGNC:14510]                          | 148  | 1.45 | 0.1600 | 9.0 | 1.5E-19 | 1.2E-18 |
| ENSG00000127952 | STYXL1     | serine/threonine/tyrosine interacting like 1 [Source:HGNC Symbol;Acc:HGNC:18165]                 | 498  | 0.77 | 0.0849 | 9.1 | 1.3E-19 | 1.1E-18 |
| ENSG00000145246 | ATP10D     | ATPase phospholipid transporting 10D (putative) [Source:HGNC Symbol;Acc:HGNC:13549]              | 636  | 0.70 | 0.0774 | 9.1 | 1.3E-19 | 1.1E-18 |
| ENSG00000229809 | ZNF688     | zinc finger protein 688 [Source:HGNC Symbol;Acc:HGNC:30489]                                      | 165  | 1.40 | 0.1545 | 9.1 | 1.3E-19 | 1.1E-18 |
| ENSG00000118515 | SGK1       | serum/glucocorticoid regulated kinase 1 [Source:HGNC Symbol;Acc:HGNC:10810]                      | 404  | 0.90 | 0.0996 | 9.1 | 1.1E-19 | 9.1E-19 |
| ENSG00000197763 | TXNRD3     | thioredoxin reductase 3 [Source:HGNC Symbol;Acc:HGNC:20667]                                      | 267  | 1.08 | 0.1186 | 9.1 | 8.2E-20 | 6.8E-19 |
| ENSG00000142875 | PRKACB     | protein kinase cAMP-activated catalytic subunit beta [Source:HGNC Symbol;Acc:HGNC:9381]          | 526  | 0.76 | 0.0837 | 9.1 | 7.1E-20 | 5.9E-19 |
| ENSG00000126653 | NSRP1      | nuclear speckle splicing regulatory protein 1 [Source:HGNC Symbol;Acc:HGNC:25305]                | 675  | 0.73 | 0.0801 | 9.1 | 7.1E-20 | 5.9E-19 |
| ENSG00000251322 | SHANK3     | SH3 and multiple ankyrin repeat domains 3 [Source:HGNC Symbol;Acc:HGNC:14294]                    | 132  | 1.68 | 0.1837 | 9.1 | 7.1E-20 | 5.8E-19 |
| ENSG00000169994 | MYO7B      | myosin VII B [Source:HGNC Symbol;Acc:HGNC:7607]                                                  | 54   | 2.77 | 0.3036 | 9.1 | 6.9E-20 | 5.7E-19 |
| ENSG00000246228 | CASC8      | cancer susceptibility 8 [Source:HGNC Symbol;Acc:HGNC:45129]                                      | 44   | 4.90 | 0.5369 | 9.1 | 6.7E-20 | 5.5E-19 |
| ENSG00000260260 | SNHG19     | small nucleolar RNA host gene 19 [Source:HGNC Symbol;Acc:HGNC:49574]                             | 401  | 0.88 | 0.0963 | 9.1 | 6.6E-20 | 5.5E-19 |
| ENSG00000164403 | SHROOM1    | shroom family member 1 [Source:HGNC Symbol;Acc:HGNC:24084]                                       | 353  | 0.91 | 0.0999 | 9.2 | 5.5E-20 | 4.5E-19 |
| ENSG00000271943 | ENSG000001 | tropomyosin 4 (TPM4) pseudogene                                                                  | 145  | 1.53 | 0.1665 | 9.2 | 5.0E-20 | 4.1E-19 |
| ENSG00000148450 | MSRB2      | methionine sulfoxide reductase B2 [Source:HGNC Symbol;Acc:HGNC:17061]                            | 167  | 1.38 | 0.1507 | 9.2 | 4.7E-20 | 3.9E-19 |
| ENSG00000165886 | UBTD1      | ubiquitin domain containing 1 [Source:HGNC Symbol;Acc:HGNC:25683]                                | 1016 | 0.57 | 0.0624 | 9.2 | 4.6E-20 | 3.8E-19 |
| ENSG00000198121 | LPAR1      | lysophosphatidic acid receptor 1 [Source:HGNC Symbol;Acc:HGNC:3166]                              | 257  | 1.13 | 0.1234 | 9.2 | 4.1E-20 | 3.4E-19 |
| ENSG00000065665 | SEC61A2    | SEC61 translocon subunit alpha 2 [Source:HGNC Symbol;Acc:HGNC:17702]                             | 223  | 1.19 | 0.1292 | 9.2 | 3.1E-20 | 2.6E-19 |
| ENSG00000197442 | MAP3K5     | mitogen-activated protein kinase kinase kinase 5 [Source:HGNC Symbol;Acc:HGNC:6857]              | 828  | 0.61 | 0.0664 | 9.2 | 2.9E-20 | 2.4E-19 |
| ENSG00000196507 | TCEAL3     | transcription elongation factor A like 3 [Source:HGNC Symbol;Acc:HGNC:28247]                     | 665  | 0.69 | 0.0747 | 9.2 | 2.9E-20 | 2.4E-19 |
| ENSG00000101577 | LPIN2      | lipin 2 [Source:HGNC Symbol;Acc:HGNC:14450]                                                      | 718  | 0.67 | 0.0724 | 9.2 | 2.8E-20 | 2.3E-19 |
| ENSG00000167604 | NFKBID     | NFKB inhibitor delta [Source:HGNC Symbol;Acc:HGNC:15671]                                         | 314  | 0.99 | 0.1075 | 9.2 | 2.7E-20 | 2.3E-19 |
| ENSG00000196155 | PLEKHG4    | pleckstrin homology and RhoGEF domain containing G4 [Source:HGNC Symbol;Acc:HGNC:24501]          | 866  | 0.63 | 0.0686 | 9.2 | 2.6E-20 | 2.2E-19 |
| ENSG00000197608 | ZNF841     | zinc finger protein 841 [Source:HGNC Symbol;Acc:HGNC:27611]                                      | 351  | 0.92 | 0.0996 | 9.3 | 1.9E-20 | 1.6E-19 |
| ENSG00000152455 | SUV39H2    | suppressor of variegation 3-9 homolog 2 [Source:HGNC Symbol;Acc:HGNC:17287]                      | 419  | 0.84 | 0.0909 | 9.3 | 1.8E-20 | 1.5E-19 |
| ENSG00000111817 | DSE        | dermatan sulfate epimerase [Source:HGNC Symbol;Acc:HGNC:21144]                                   | 905  | 0.59 | 0.0640 | 9.3 | 1.7E-20 | 1.4E-19 |
| ENSG00000196967 | ZNF585A    | zinc finger protein 585A [Source:HGNC Symbol;Acc:HGNC:26305]                                     | 129  | 1.57 | 0.1691 | 9.3 | 1.6E-20 | 1.4E-19 |
| ENSG00000189068 | VSTM1      | V-set and transmembrane domain containing 1 [Source:HGNC Symbol;Acc:HGNC:29455]                  | 54   | 5.83 | 0.6283 | 9.3 | 1.6E-20 | 1.4E-19 |
| ENSG00000102967 | DHODH      | dihydroorotate dehydrogenase (quinone) [Source:HGNC Symbol;Acc:HGNC:2867]                        | 649  | 0.70 | 0.0750 | 9.3 | 1.6E-20 | 1.3E-19 |
| ENSG00000179271 | GADD45GIP  | GADD45G interacting protein 1 [Source:HGNC Symbol;Acc:HGNC:29996]                                | 1900 | 0.52 | 0.0558 | 9.3 | 1.5E-20 | 1.3E-19 |
| ENSG00000204264 | PSMB8      | proteasome 20S subunit beta 8 [Source:HGNC Symbol;Acc:HGNC:9545]                                 | 944  | 0.59 | 0.0635 | 9.3 | 1.5E-20 | 1.2E-19 |
| ENSG0000020577  | SAMD4A     | sterile alpha motif domain containing 4A [Source:HGNC Symbol;Acc:HGNC:23023]                     | 1281 | 0.52 | 0.0557 | 9.3 | 1.4E-20 | 1.2E-19 |

|                 |                 |                                                                                                                |      |      |        |     |         |         |
|-----------------|-----------------|----------------------------------------------------------------------------------------------------------------|------|------|--------|-----|---------|---------|
| ENSG00000182240 | BACE2           | beta-secretase 2 [Source:HGNC Symbol;Acc:HGNC:934]                                                             | 1016 | 0.57 | 0.0615 | 9.3 | 1.3E-20 | 1.1E-19 |
| ENSG00000064012 | CASP8           | caspase 8 [Source:HGNC Symbol;Acc:HGNC:1509]                                                                   | 796  | 0.65 | 0.0695 | 9.3 | 1.2E-20 | 1.1E-19 |
| ENSG00000071051 | NCK2            | NCK adaptor protein 2 [Source:HGNC Symbol;Acc:HGNC:7665]                                                       | 765  | 0.66 | 0.0700 | 9.4 | 8.5E-21 | 7.3E-20 |
| ENSG00000164430 | CGAS            | cyclic GMP-AMP synthase [Source:HGNC Symbol;Acc:HGNC:21367]                                                    | 282  | 1.12 | 0.1198 | 9.4 | 7.8E-21 | 6.7E-20 |
| ENSG00000173917 | HOXB2           | homeobox B2 [Source:HGNC Symbol;Acc:HGNC:5113]                                                                 | 126  | 1.60 | 0.1712 | 9.4 | 7.3E-21 | 6.3E-20 |
| ENSG00000133816 | MICAL2          | microtubule associated monooxygenase, calponin and LIM domain containing 2 [Source:HGNC Symbol;Acc:HGNC:10252] | 541  | 0.83 | 0.0880 | 9.4 | 6.8E-21 | 5.8E-20 |
| ENSG00000219507 | FTH1P8          | ferritin heavy chain 1 pseudogene 8 [Source:HGNC Symbol;Acc:HGNC:3995]                                         | 480  | 0.85 | 0.0905 | 9.4 | 6.3E-21 | 5.4E-20 |
| ENSG00000251495 | PPIAP11         | peptidylprolyl isomerase A pseudogene 11 [Source:HGNC Symbol;Acc:HGNC:9263]                                    | 421  | 0.93 | 0.0995 | 9.4 | 5.8E-21 | 4.9E-20 |
| ENSG00000173276 | ZBTB21          | zinc finger and BTB domain containing 21 [Source:HGNC Symbol;Acc:HGNC:13083]                                   | 824  | 0.65 | 0.0686 | 9.4 | 3.5E-21 | 3.0E-20 |
| ENSG00000105173 | CCNE1           | cyclin E1 [Source:HGNC Symbol;Acc:HGNC:1589]                                                                   | 919  | 0.62 | 0.0655 | 9.5 | 3.3E-21 | 2.8E-20 |
| ENSG00000152503 | TRIM36          | tripartite motif containing 36 [Source:HGNC Symbol;Acc:HGNC:16280]                                             | 95   | 2.10 | 0.2225 | 9.5 | 3.3E-21 | 2.8E-20 |
| ENSG00000167523 | SPATA33         | spermatogenesis associated 33 [Source:HGNC Symbol;Acc:HGNC:26463]                                              | 198  | 1.30 | 0.1377 | 9.5 | 3.2E-21 | 2.8E-20 |
| ENSG00000134318 | ROCK2           | Rho associated coiled-coil containing protein kinase 2 [Source:HGNC Symbol;Acc:HGNC:10252]                     | 1185 | 0.55 | 0.0584 | 9.5 | 3.1E-21 | 2.7E-20 |
| ENSG00000105810 | CDK6            | cyclin dependent kinase 6 [Source:HGNC Symbol;Acc:HGNC:1777]                                                   | 1325 | 0.53 | 0.0559 | 9.5 | 2.6E-21 | 2.3E-20 |
| ENSG00000140939 | NOL3            | nucleolar protein 3 [Source:HGNC Symbol;Acc:HGNC:7869]                                                         | 1003 | 0.58 | 0.0615 | 9.5 | 2.6E-21 | 2.2E-20 |
| ENSG00000171488 | LRRRC8C         | leucine rich repeat containing 8 VRAC subunit C [Source:HGNC Symbol;Acc:HGNC:25075]                            | 151  | 1.49 | 0.1573 | 9.5 | 2.5E-21 | 2.2E-20 |
| ENSG00000151789 | ZNF385D         | zinc finger protein 385D [Source:HGNC Symbol;Acc:HGNC:26191]                                                   | 47   | 4.84 | 0.5104 | 9.5 | 2.4E-21 | 2.1E-20 |
| ENSG00000171723 | GPHN            | gephyrin [Source:HGNC Symbol;Acc:HGNC:15465]                                                                   | 289  | 1.09 | 0.1142 | 9.5 | 2.0E-21 | 1.8E-20 |
| ENSG00000197302 | ZNF720          | zinc finger protein 720 [Source:HGNC Symbol;Acc:HGNC:26987]                                                    | 154  | 1.48 | 0.1551 | 9.5 | 1.6E-21 | 1.4E-20 |
| ENSG00000181192 | DHTKD1          | dehydrogenase E1 and transketolase domain containing 1 [Source:HGNC Symbol;Acc:HGNC:23537]                     | 1154 | 0.55 | 0.0574 | 9.6 | 1.3E-21 | 1.1E-20 |
| ENSG00000140848 | CPNE2           | copine 2 [Source:HGNC Symbol;Acc:HGNC:2315]                                                                    | 1523 | 0.51 | 0.0537 | 9.6 | 1.2E-21 | 1.0E-20 |
| ENSG00000072415 | MPP5            | membrane palmitoylated protein 5 [Source:HGNC Symbol;Acc:HGNC:18669]                                           | 1167 | 0.57 | 0.0597 | 9.6 | 1.2E-21 | 1.0E-20 |
| ENSG00000136997 | MYC             | MYC proto-oncogene, bHLH transcription factor [Source:HGNC Symbol;Acc:HGNC:7553]                               | 1294 | 0.59 | 0.0615 | 9.6 | 1.1E-21 | 9.3E-21 |
| ENSG00000162384 | CZIB            | CXXC motif containing zinc binding protein [Source:HGNC Symbol;Acc:HGNC:26059]                                 | 853  | 0.65 | 0.0683 | 9.6 | 1.0E-21 | 9.2E-21 |
| ENSG00000269825 | ENSG00000269825 | novel zinc finger protein                                                                                      | 200  | 1.31 | 0.1373 | 9.6 | 1.0E-21 | 9.0E-21 |
| ENSG00000145545 | SRD5A1          | steroid 5 alpha-reductase 1 [Source:HGNC Symbol;Acc:HGNC:11284]                                                | 1419 | 0.52 | 0.0540 | 9.6 | 9.2E-22 | 8.1E-21 |
| ENSG00000158163 | DZIP1L          | DAZ interacting zinc finger protein 1 like [Source:HGNC Symbol;Acc:HGNC:26551]                                 | 149  | 1.51 | 0.1579 | 9.6 | 9.1E-22 | 8.0E-21 |
| ENSG00000145832 | SLC25A48        | solute carrier family 25 member 48 [Source:HGNC Symbol;Acc:HGNC:30451]                                         | 55   | 5.62 | 0.5851 | 9.6 | 7.5E-22 | 6.6E-21 |
| ENSG00000068079 | IFI35           | interferon induced protein 35 [Source:HGNC Symbol;Acc:HGNC:5399]                                               | 1419 | 0.57 | 0.0594 | 9.6 | 6.8E-22 | 6.0E-21 |
| ENSG00000156011 | PSD3            | pleckstrin and Sec7 domain containing 3 [Source:HGNC Symbol;Acc:HGNC:19093]                                    | 231  | 1.22 | 0.1268 | 9.6 | 6.3E-22 | 5.6E-21 |
| ENSG00000152422 | XRCC4           | X-ray repair cross complementing 4 [Source:HGNC Symbol;Acc:HGNC:12831]                                         | 372  | 0.93 | 0.0963 | 9.6 | 5.5E-22 | 4.9E-21 |
| ENSG00000204860 | FAM201A         | family with sequence similarity 201 member A [Source:HGNC Symbol;Acc:HGNC:27239]                               | 90   | 2.05 | 0.2122 | 9.6 | 5.4E-22 | 4.8E-21 |
| ENSG00000116096 | SPR             | sepiapterin reductase [Source:HGNC Symbol;Acc:HGNC:11257]                                                      | 1603 | 0.52 | 0.0537 | 9.7 | 4.1E-22 | 3.6E-21 |
| ENSG00000151229 | SLC2A13         | solute carrier family 2 member 13 [Source:HGNC Symbol;Acc:HGNC:15956]                                          | 114  | 1.82 | 0.1878 | 9.7 | 3.8E-22 | 3.4E-21 |
| ENSG00000196876 | SCN8A           | sodium voltage-gated channel alpha subunit 8 [Source:HGNC Symbol;Acc:HGNC:10596]                               | 300  | 1.10 | 0.1131 | 9.7 | 2.8E-22 | 2.5E-21 |
| ENSG00000108557 | RAI1            | retinoic acid induced 1 [Source:HGNC Symbol;Acc:HGNC:9834]                                                     | 1706 | 0.51 | 0.0522 | 9.7 | 2.6E-22 | 2.3E-21 |
| ENSG00000165806 | CASP7           | caspase 7 [Source:HGNC Symbol;Acc:HGNC:1508]                                                                   | 1121 | 0.57 | 0.0590 | 9.7 | 2.4E-22 | 2.1E-21 |
| ENSG00000140854 | KATNB1          | katanin regulatory subunit B1 [Source:HGNC Symbol;Acc:HGNC:6217]                                               | 591  | 0.75 | 0.0767 | 9.7 | 2.1E-22 | 1.9E-21 |
| ENSG00000135250 | SRPK2           | SRSF protein kinase 2 [Source:HGNC Symbol;Acc:HGNC:11306]                                                      | 1260 | 0.55 | 0.0562 | 9.7 | 2.1E-22 | 1.9E-21 |
| ENSG00000105778 | AVL9            | AVL9 cell migration associated [Source:HGNC Symbol;Acc:HGNC:28994]                                             | 1346 | 0.57 | 0.0589 | 9.7 | 2.1E-22 | 1.9E-21 |
| ENSG00000132535 | DLG4            | discs large MAGUK scaffold protein 4 [Source:HGNC Symbol;Acc:HGNC:2903]                                        | 152  | 1.63 | 0.1676 | 9.7 | 1.9E-22 | 1.7E-21 |
| ENSG00000136770 | DNAJC1          | DnaJ heat shock protein family (Hsp40) member C1 [Source:HGNC Symbol;Acc:HGNC:20090]                           | 779  | 0.67 | 0.0687 | 9.7 | 1.9E-22 | 1.7E-21 |

|                 |            |                                                                                                 |      |      |        |      |         |         |
|-----------------|------------|-------------------------------------------------------------------------------------------------|------|------|--------|------|---------|---------|
| ENSG00000173905 | GOLIM4     | golgi integral membrane protein 4 [Source:HGNC Symbol;Acc:HGNC:15448]                           | 1451 | 0.59 | 0.0602 | 9.8  | 1.7E-22 | 1.6E-21 |
| ENSG00000269834 | ZNF528-AS1 | ZNF528 antisense RNA 1 [Source:HGNC Symbol;Acc:HGNC:51305]                                      | 147  | 1.55 | 0.1584 | 9.8  | 1.6E-22 | 1.4E-21 |
| ENSG00000144591 | GMPPA      | GDP-mannose pyrophosphorylase A [Source:HGNC Symbol;Acc:HGNC:22923]                             | 1306 | 0.54 | 0.0551 | 9.8  | 1.5E-22 | 1.4E-21 |
| ENSG00000242498 | ARPIN      | actin related protein 2/3 complex inhibitor [Source:HGNC Symbol;Acc:HGNC:28782]                 | 511  | 0.88 | 0.0892 | 9.8  | 1.0E-22 | 9.1E-22 |
| ENSG00000129235 | TXNDC17    | thioredoxin domain containing 17 [Source:HGNC Symbol;Acc:HGNC:28218]                            | 1442 | 0.62 | 0.0633 | 9.8  | 8.8E-23 | 7.9E-22 |
| ENSG00000284024 | ENSG000002 | novel protein                                                                                   | 444  | 0.89 | 0.0901 | 9.8  | 8.0E-23 | 7.2E-22 |
| ENSG00000173894 | CBX2       | chromobox 2 [Source:HGNC Symbol;Acc:HGNC:1552]                                                  | 382  | 0.98 | 0.0995 | 9.8  | 7.0E-23 | 6.3E-22 |
| ENSG00000137547 | MRPL15     | mitochondrial ribosomal protein L15 [Source:HGNC Symbol;Acc:HGNC:14054]                         | 1525 | 0.54 | 0.0546 | 9.9  | 6.4E-23 | 5.8E-22 |
| ENSG00000103351 | CLUAP1     | clusterin associated protein 1 [Source:HGNC Symbol;Acc:HGNC:19009]                              | 191  | 1.37 | 0.1388 | 9.9  | 6.1E-23 | 5.6E-22 |
| ENSG00000144724 | PTPRG      | protein tyrosine phosphatase receptor type G [Source:HGNC Symbol;Acc:HGNC:9671]                 | 498  | 0.89 | 0.0901 | 9.9  | 6.0E-23 | 5.4E-22 |
| ENSG00000131188 | PRR7       | proline rich 7, synaptic [Source:HGNC Symbol;Acc:HGNC:28130]                                    | 161  | 1.61 | 0.1628 | 9.9  | 5.7E-23 | 5.2E-22 |
| ENSG00000149177 | PTPRJ      | protein tyrosine phosphatase receptor type J [Source:HGNC Symbol;Acc:HGNC:9673]                 | 1341 | 0.53 | 0.0541 | 9.9  | 5.7E-23 | 5.2E-22 |
| ENSG00000116717 | GADD45A    | growth arrest and DNA damage inducible alpha [Source:HGNC Symbol;Acc:HGNC:4095]                 | 2926 | 0.50 | 0.0508 | 9.9  | 5.5E-23 | 5.0E-22 |
| ENSG0000050344  | NFE2L3     | nuclear factor, erythroid 2 like 3 [Source:HGNC Symbol;Acc:HGNC:7783]                           | 258  | 1.15 | 0.1165 | 9.9  | 4.7E-23 | 4.3E-22 |
| ENSG00000162006 | MSLNL      | mesothelin like [Source:HGNC Symbol;Acc:HGNC:14170]                                             | 79   | 6.64 | 0.6691 | 9.9  | 3.5E-23 | 3.2E-22 |
| ENSG00000176783 | RUFY1      | RUN and FYVE domain containing 1 [Source:HGNC Symbol;Acc:HGNC:19760]                            | 904  | 0.64 | 0.0644 | 9.9  | 2.7E-23 | 2.5E-22 |
| ENSG00000103042 | SLC38A7    | solute carrier family 38 member 7 [Source:HGNC Symbol;Acc:HGNC:25582]                           | 669  | 0.73 | 0.0732 | 10.0 | 1.9E-23 | 1.8E-22 |
| ENSG00000189410 | SH2D5      | SH2 domain containing 5 [Source:HGNC Symbol;Acc:HGNC:28819]                                     | 92   | 2.18 | 0.2181 | 10.0 | 1.6E-23 | 1.5E-22 |
| ENSG00000167695 | TLCD3A     | TLC domain containing 3A [Source:HGNC Symbol;Acc:HGNC:29646]                                    | 577  | 0.78 | 0.0782 | 10.0 | 1.5E-23 | 1.4E-22 |
| ENSG00000154237 | LRRK1      | leucine rich repeat kinase 1 [Source:HGNC Symbol;Acc:HGNC:18608]                                | 351  | 1.00 | 0.1004 | 10.0 | 1.5E-23 | 1.4E-22 |
| ENSG00000509321 | CRAT       | carnitine O-acetyltransferase [Source:HGNC Symbol;Acc:HGNC:2342]                                | 474  | 0.92 | 0.0919 | 10.0 | 1.4E-23 | 1.3E-22 |
| ENSG00000266074 | BAHCC1     | BAH domain and coiled-coil containing 1 [Source:HGNC Symbol;Acc:HGNC:29279]                     | 290  | 1.11 | 0.1112 | 10.0 | 1.4E-23 | 1.3E-22 |
| ENSG00000203722 | RAET1G     | retinoic acid early transcript 1G [Source:HGNC Symbol;Acc:HGNC:16795]                           | 57   | 3.23 | 0.3223 | 10.0 | 1.4E-23 | 1.3E-22 |
| ENSG00000102265 | TIMP1      | TIMP metalloproteinase inhibitor 1 [Source:HGNC Symbol;Acc:HGNC:11820]                          | 1033 | 1.90 | 0.1898 | 10.0 | 1.4E-23 | 1.3E-22 |
| ENSG00000124313 | IQSEC2     | IQ motif and Sec7 domain ArfGEF 2 [Source:HGNC Symbol;Acc:HGNC:29059]                           | 479  | 0.88 | 0.0874 | 10.0 | 1.2E-23 | 1.1E-22 |
| ENSG00000197937 | ZNF347     | zinc finger protein 347 [Source:HGNC Symbol;Acc:HGNC:16447]                                     | 456  | 0.91 | 0.0906 | 10.0 | 1.1E-23 | 1.0E-22 |
| ENSG00000106554 | CHCHD3     | coiled-coil-helix-coiled-coil-helix domain containing 3 [Source:HGNC Symbol;Acc:HGNC:21906]     | 1628 | 0.51 | 0.0508 | 10.1 | 9.2E-24 | 8.5E-23 |
| ENSG00000174370 | C11orf45   | chromosome 11 open reading frame 45 [Source:HGNC Symbol;Acc:HGNC:28584]                         | 265  | 1.16 | 0.1153 | 10.1 | 8.6E-24 | 8.0E-23 |
| ENSG00000109689 | STIM2      | stromal interaction molecule 2 [Source:HGNC Symbol;Acc:HGNC:19205]                              | 665  | 0.77 | 0.0761 | 10.1 | 8.6E-24 | 8.0E-23 |
| ENSG00000063241 | ISOC2      | isochorismatase domain containing 2 [Source:HGNC Symbol;Acc:HGNC:26278]                         | 1076 | 0.62 | 0.0614 | 10.1 | 7.8E-24 | 7.3E-23 |
| ENSG00000182117 | NOP10      | NOP10 ribonucleoprotein [Source:HGNC Symbol;Acc:HGNC:14378]                                     | 2250 | 0.55 | 0.0543 | 10.1 | 5.8E-24 | 5.5E-23 |
| ENSG00000127990 | SGCE       | sarcoglycan epsilon [Source:HGNC Symbol;Acc:HGNC:10808]                                         | 1265 | 0.58 | 0.0577 | 10.1 | 5.5E-24 | 5.2E-23 |
| ENSG00000169991 | IFFO2      | intermediate filament family orphan 2 [Source:HGNC Symbol;Acc:HGNC:27006]                       | 778  | 0.70 | 0.0689 | 10.1 | 5.5E-24 | 5.1E-23 |
| ENSG00000140365 | COMMD4     | COMM domain containing 4 [Source:HGNC Symbol;Acc:HGNC:26027]                                    | 1936 | 0.50 | 0.0498 | 10.1 | 5.0E-24 | 4.7E-23 |
| ENSG00000165233 | CARD19     | caspase recruitment domain family member 19 [Source:HGNC Symbol;Acc:HGNC:28148]                 | 578  | 0.79 | 0.0779 | 10.1 | 4.7E-24 | 4.4E-23 |
| ENSG00000158186 | MRAS       | muscle RAS oncogene homolog [Source:HGNC Symbol;Acc:HGNC:7227]                                  | 568  | 0.80 | 0.0791 | 10.1 | 4.6E-24 | 4.4E-23 |
| ENSG00000179085 | DPM3       | dolichyl-phosphate mannosyltransferase subunit 3, regulatory [Source:HGNC Symbol;Acc:HGNC:3007] | 709  | 0.76 | 0.0748 | 10.1 | 4.5E-24 | 4.2E-23 |
| ENSG00000137959 | IFI44L     | interferon induced protein 44 like [Source:HGNC Symbol;Acc:HGNC:17817]                          | 948  | 0.72 | 0.0713 | 10.1 | 4.1E-24 | 3.8E-23 |
| ENSG00000169188 | APEX2      | apurinic/aprimidinic endodeoxyribonuclease 2 [Source:HGNC Symbol;Acc:HGNC:17889]                | 1021 | 0.64 | 0.0631 | 10.1 | 3.3E-24 | 3.2E-23 |
| ENSG00000135698 | MPHOSPH6   | M-phase phosphoprotein 6 [Source:HGNC Symbol;Acc:HGNC:7214]                                     | 286  | 1.15 | 0.1135 | 10.2 | 2.8E-24 | 2.7E-23 |
| ENSG00000142892 | PIGK       | phosphatidylinositol glycan anchor biosynthesis class K [Source:HGNC Symbol;Acc:HGNC:8965]      | 975  | 0.63 | 0.0618 | 10.2 | 2.7E-24 | 2.6E-23 |
| ENSG00000042286 | AIFM2      | apoptosis inducing factor mitochondria associated 2 [Source:HGNC Symbol;Acc:HGNC:21411]         | 427  | 0.95 | 0.0931 | 10.2 | 2.7E-24 | 2.6E-23 |

|                 |                 |                                                                                                                 |      |      |        |      |         |         |
|-----------------|-----------------|-----------------------------------------------------------------------------------------------------------------|------|------|--------|------|---------|---------|
| ENSG00000106031 | HOXA13          | homeobox A13 [Source:HGNC Symbol;Acc:HGNC:5102]                                                                 | 154  | 1.61 | 0.1582 | 10.2 | 2.3E-24 | 2.2E-23 |
| ENSG00000164294 | GPX8            | glutathione peroxidase 8 (putative) [Source:HGNC Symbol;Acc:HGNC:33100]                                         | 463  | 0.90 | 0.0882 | 10.2 | 2.3E-24 | 2.1E-23 |
| ENSG00000129925 | PGAP6           | post-glycosylphosphatidylinositol attachment to proteins 6 [Source:HGNC Symbol;Acc:HGNC:17205]                  | 1267 | 0.57 | 0.0557 | 10.2 | 2.2E-24 | 2.1E-23 |
| ENSG00000281398 | SNHG4           | small nucleolar RNA host gene 4 [Source:HGNC Symbol;Acc:HGNC:32964]                                             | 218  | 1.31 | 0.1280 | 10.2 | 2.0E-24 | 1.9E-23 |
| ENSG00000153814 | JAZF1           | JAZF zinc finger 1 [Source:HGNC Symbol;Acc:HGNC:28917]                                                          | 228  | 1.32 | 0.1296 | 10.2 | 2.0E-24 | 1.9E-23 |
| ENSG00000083093 | PALB2           | partner and localizer of BRCA2 [Source:HGNC Symbol;Acc:HGNC:26144]                                              | 723  | 0.73 | 0.0712 | 10.2 | 1.8E-24 | 1.7E-23 |
| ENSG00000134452 | FBH1            | F-box DNA helicase 1 [Source:HGNC Symbol;Acc:HGNC:13620]                                                        | 635  | 0.77 | 0.0751 | 10.2 | 1.4E-24 | 1.3E-23 |
| ENSG00000165609 | NUDT5           | nudix hydrolase 5 [Source:HGNC Symbol;Acc:HGNC:8052]                                                            | 655  | 0.77 | 0.0753 | 10.2 | 1.3E-24 | 1.2E-23 |
| ENSG00000168101 | NUDT16L1        | nudix hydrolase 16 like 1 [Source:HGNC Symbol;Acc:HGNC:28154]                                                   | 1032 | 0.64 | 0.0624 | 10.2 | 1.2E-24 | 1.2E-23 |
| ENSG00000257335 | MGAM            | maltase-glucoamylase [Source:HGNC Symbol;Acc:HGNC:7043]                                                         | 108  | 2.00 | 0.1944 | 10.3 | 1.0E-24 | 9.8E-24 |
| ENSG00000135905 | DOCK10          | dedicator of cytokinesis 10 [Source:HGNC Symbol;Acc:HGNC:23479]                                                 | 165  | 1.57 | 0.1527 | 10.3 | 9.5E-25 | 9.1E-24 |
| ENSG00000113742 | CPEB4           | cytoplasmic polyadenylation element binding protein 4 [Source:HGNC Symbol;Acc:HGNC:21747]                       | 1045 | 0.61 | 0.0593 | 10.3 | 9.5E-25 | 9.1E-24 |
| ENSG00000227376 | FTH1P16         | ferritin heavy chain 1 pseudogene 16 [Source:HGNC Symbol;Acc:HGNC:3986]                                         | 552  | 0.87 | 0.0849 | 10.3 | 9.2E-25 | 8.9E-24 |
| ENSG00000092853 | CLSPN           | claspin [Source:HGNC Symbol;Acc:HGNC:19715]                                                                     | 1173 | 0.62 | 0.0601 | 10.3 | 7.9E-25 | 7.6E-24 |
| ENSG00000279806 | ENSG00000279806 | TEC                                                                                                             | 66   | 2.92 | 0.2832 | 10.3 | 7.5E-25 | 7.3E-24 |
| ENSG00000198464 | ZNF480          | zinc finger protein 480 [Source:HGNC Symbol;Acc:HGNC:23305]                                                     | 478  | 0.89 | 0.0864 | 10.3 | 6.9E-25 | 6.7E-24 |
| ENSG00000249815 | ENSG00000249815 | novel transcript                                                                                                | 53   | 3.91 | 0.3799 | 10.3 | 6.8E-25 | 6.6E-24 |
| ENSG00000144063 | MALL            | mal, T cell differentiation protein like [Source:HGNC Symbol;Acc:HGNC:6818]                                     | 825  | 0.71 | 0.0688 | 10.3 | 6.4E-25 | 6.2E-24 |
| ENSG00000148926 | ADM             | adrenomedullin [Source:HGNC Symbol;Acc:HGNC:259]                                                                | 1398 | 0.54 | 0.0526 | 10.3 | 6.2E-25 | 6.0E-24 |
| ENSG00000177700 | POLR2L          | RNA polymerase II, I and III subunit L [Source:HGNC Symbol;Acc:HGNC:9199]                                       | 1973 | 0.51 | 0.0497 | 10.3 | 6.0E-25 | 5.8E-24 |
| ENSG00000127580 | WDR24           | WD repeat domain 24 [Source:HGNC Symbol;Acc:HGNC:20852]                                                         | 199  | 1.52 | 0.1472 | 10.3 | 5.8E-25 | 5.6E-24 |
| ENSG00000198892 | SHISA4          | shisa family member 4 [Source:HGNC Symbol;Acc:HGNC:27139]                                                       | 429  | 1.05 | 0.1018 | 10.3 | 4.8E-25 | 4.6E-24 |
| ENSG00000203950 | RTL8A           | retrotransposon Gag like 8A [Source:HGNC Symbol;Acc:HGNC:24514]                                                 | 902  | 0.69 | 0.0670 | 10.3 | 4.4E-25 | 4.3E-24 |
| ENSG00000126458 | RRAS            | RAS related [Source:HGNC Symbol;Acc:HGNC:10447]                                                                 | 1415 | 0.58 | 0.0558 | 10.3 | 4.3E-25 | 4.2E-24 |
| ENSG00000007392 | LUC7L           | LUC7 like [Source:HGNC Symbol;Acc:HGNC:6723]                                                                    | 491  | 0.90 | 0.0869 | 10.4 | 4.0E-25 | 3.9E-24 |
| ENSG00000126705 | AHDC1           | AT-hook DNA binding motif containing 1 [Source:HGNC Symbol;Acc:HGNC:25230]                                      | 1396 | 0.56 | 0.0540 | 10.4 | 3.8E-25 | 3.7E-24 |
| ENSG00000184232 | OAF             | out at first homolog [Source:HGNC Symbol;Acc:HGNC:28752]                                                        | 251  | 1.38 | 0.1332 | 10.4 | 3.2E-25 | 3.1E-24 |
| ENSG00000141905 | NFIC            | nuclear factor I C [Source:HGNC Symbol;Acc:HGNC:7786]                                                           | 842  | 0.86 | 0.0825 | 10.4 | 3.1E-25 | 3.0E-24 |
| ENSG00000243156 | MICAL3          | microtubule associated monooxygenase, calponin and LIM domain containing 3 [Source:HGNC Symbol;Acc:HGNC:243156] | 1761 | 0.54 | 0.0523 | 10.4 | 2.9E-25 | 2.8E-24 |
| ENSG00000137331 | IER3            | immediate early response 3 [Source:HGNC Symbol;Acc:HGNC:5392]                                                   | 334  | 1.10 | 0.1054 | 10.4 | 2.2E-25 | 2.1E-24 |
| ENSG00000154134 | ROBO3           | roundabout guidance receptor 3 [Source:HGNC Symbol;Acc:HGNC:13433]                                              | 305  | 1.13 | 0.1089 | 10.4 | 2.0E-25 | 2.0E-24 |
| ENSG00000107929 | LARP4B          | La ribonucleoprotein 4B [Source:HGNC Symbol;Acc:HGNC:28987]                                                     | 1136 | 0.63 | 0.0605 | 10.4 | 1.8E-25 | 1.8E-24 |
| ENSG00000186063 | AIDA            | axon interactor, dorsalization associated [Source:HGNC Symbol;Acc:HGNC:25761]                                   | 1651 | 0.51 | 0.0491 | 10.4 | 1.7E-25 | 1.7E-24 |
| ENSG00000104267 | CA2             | carbonic anhydrase 2 [Source:HGNC Symbol;Acc:HGNC:1373]                                                         | 109  | 2.05 | 0.1964 | 10.4 | 1.5E-25 | 1.5E-24 |
| ENSG00000158545 | ZC3H18          | zinc finger CCCH-type containing 18 [Source:HGNC Symbol;Acc:HGNC:25091]                                         | 1527 | 0.53 | 0.0510 | 10.5 | 1.4E-25 | 1.4E-24 |
| ENSG00000123213 | NLN             | neurolysin [Source:HGNC Symbol;Acc:HGNC:16058]                                                                  | 619  | 0.80 | 0.0767 | 10.5 | 1.3E-25 | 1.3E-24 |
| ENSG00000131797 | CLUHP3          | clustered mitochondria homolog pseudogene 3 [Source:HGNC Symbol;Acc:HGNC:28447]                                 | 296  | 1.20 | 0.1147 | 10.5 | 1.2E-25 | 1.2E-24 |
| ENSG00000162616 | DNAJB4          | DnaJ heat shock protein family (Hsp40) member B4 [Source:HGNC Symbol;Acc:HGNC:14886]                            | 457  | 0.97 | 0.0925 | 10.5 | 1.2E-25 | 1.2E-24 |
| ENSG00000175573 | C11orf68        | chromosome 11 open reading frame 68 [Source:HGNC Symbol;Acc:HGNC:28801]                                         | 1290 | 0.57 | 0.0547 | 10.5 | 1.2E-25 | 1.2E-24 |
| ENSG00000140650 | PMM2            | phosphomannomutase 2 [Source:HGNC Symbol;Acc:HGNC:9115]                                                         | 383  | 1.02 | 0.0978 | 10.5 | 1.2E-25 | 1.1E-24 |
| ENSG00000197702 | PARVA           | parvin alpha [Source:HGNC Symbol;Acc:HGNC:14652]                                                                | 662  | 0.78 | 0.0747 | 10.5 | 1.1E-25 | 1.1E-24 |
| ENSG00000164620 | RELL2           | RELT like 2 [Source:HGNC Symbol;Acc:HGNC:26902]                                                                 | 278  | 1.22 | 0.1167 | 10.5 | 1.1E-25 | 1.1E-24 |

|                 |            |                                                                                               |      |      |        |      |         |         |
|-----------------|------------|-----------------------------------------------------------------------------------------------|------|------|--------|------|---------|---------|
| ENSG00000067141 | NEO1       | neogenin 1 [Source:HGNC Symbol;Acc:HGNC:7754]                                                 | 812  | 0.75 | 0.0718 | 10.5 | 9.3E-26 | 9.2E-25 |
| ENSG00000226328 | NUP50-DT   | NUP50 divergent transcript [Source:HGNC Symbol;Acc:HGNC:50502]                                | 135  | 1.89 | 0.1801 | 10.5 | 7.9E-26 | 7.9E-25 |
| ENSG00000135525 | MAP7       | microtubule associated protein 7 [Source:HGNC Symbol;Acc:HGNC:6869]                           | 1320 | 0.57 | 0.0541 | 10.5 | 7.8E-26 | 7.8E-25 |
| ENSG00000168056 | LTPB3      | latent transforming growth factor beta binding protein 3 [Source:HGNC Symbol;Acc:HGNC:6716]   | 1992 | 0.55 | 0.0520 | 10.5 | 7.4E-26 | 7.4E-25 |
| ENSG00000184110 | EIF3C      | eukaryotic translation initiation factor 3 subunit C [Source:HGNC Symbol;Acc:HGNC:3279]       | 744  | 0.74 | 0.0700 | 10.5 | 6.9E-26 | 6.9E-25 |
| ENSG00000189343 | RPS2P46    | ribosomal protein S2 pseudogene 46 [Source:HGNC Symbol;Acc:HGNC:35839]                        | 394  | 1.06 | 0.1005 | 10.5 | 6.9E-26 | 6.9E-25 |
| ENSG00000163697 | APBB2      | amyloid beta precursor protein binding family B member 2 [Source:HGNC Symbol;Acc:HGNC:582]    | 1583 | 0.56 | 0.0532 | 10.5 | 6.2E-26 | 6.2E-25 |
| ENSG00000136854 | STXBP1     | syntaxin binding protein 1 [Source:HGNC Symbol;Acc:HGNC:11444]                                | 588  | 0.82 | 0.0783 | 10.5 | 6.2E-26 | 6.2E-25 |
| ENSG00000153443 | UBALD1     | UBA like domain containing 1 [Source:HGNC Symbol;Acc:HGNC:29576]                              | 751  | 0.73 | 0.0688 | 10.5 | 5.2E-26 | 5.2E-25 |
| ENSG00000137509 | PRCP       | prolylcarboxypeptidase [Source:HGNC Symbol;Acc:HGNC:9344]                                     | 1162 | 0.64 | 0.0605 | 10.6 | 5.0E-26 | 5.0E-25 |
| ENSG00000183570 | PCBP3      | poly(rC) binding protein 3 [Source:HGNC Symbol;Acc:HGNC:8651]                                 | 57   | 3.69 | 0.3495 | 10.6 | 4.6E-26 | 4.7E-25 |
| ENSG00000136877 | FPGS       | folypolyglutamate synthase [Source:HGNC Symbol;Acc:HGNC:3824]                                 | 1072 | 0.70 | 0.0666 | 10.6 | 4.3E-26 | 4.4E-25 |
| ENSG00000108091 | CCDC6      | coiled-coil domain containing 6 [Source:HGNC Symbol;Acc:HGNC:18782]                           | 1052 | 0.66 | 0.0627 | 10.6 | 3.7E-26 | 3.8E-25 |
| ENSG00000153066 | TXNDC11    | thioredoxin domain containing 11 [Source:HGNC Symbol;Acc:HGNC:28030]                          | 1784 | 0.54 | 0.0510 | 10.6 | 2.8E-26 | 2.8E-25 |
| ENSG00000164713 | BRI3       | brain protein I3 [Source:HGNC Symbol;Acc:HGNC:1109]                                           | 1333 | 0.58 | 0.0549 | 10.6 | 2.3E-26 | 2.3E-25 |
| ENSG00000261373 | VPS9D1-AS1 | VPS9D1 antisense RNA 1 [Source:HGNC Symbol;Acc:HGNC:48915]                                    | 109  | 2.06 | 0.1939 | 10.6 | 2.0E-26 | 2.0E-25 |
| ENSG00000138771 | SHROOM3    | shroom family member 3 [Source:HGNC Symbol;Acc:HGNC:30422]                                    | 1319 | 0.58 | 0.0544 | 10.6 | 1.9E-26 | 2.0E-25 |
| ENSG00000129667 | RHBDF2     | rhomboid 5 homolog 2 [Source:HGNC Symbol;Acc:HGNC:20788]                                      | 305  | 1.25 | 0.1175 | 10.6 | 1.8E-26 | 1.8E-25 |
| ENSG00000177675 | CD163L1    | CD163 molecule like 1 [Source:HGNC Symbol;Acc:HGNC:30375]                                     | 170  | 1.66 | 0.1557 | 10.7 | 1.7E-26 | 1.8E-25 |
| ENSG00000100299 | ARSA       | arylsulfatase A [Source:HGNC Symbol;Acc:HGNC:713]                                             | 542  | 0.87 | 0.0817 | 10.7 | 1.7E-26 | 1.7E-25 |
| ENSG00000166780 | BMERB1     | bMERB domain containing 1 [Source:HGNC Symbol;Acc:HGNC:19213]                                 | 85   | 2.46 | 0.2306 | 10.7 | 1.7E-26 | 1.7E-25 |
| ENSG00000141002 | TCF25      | transcription factor 25 [Source:HGNC Symbol;Acc:HGNC:29181]                                   | 1230 | 0.59 | 0.0550 | 10.7 | 1.3E-26 | 1.3E-25 |
| ENSG00000166128 | RAB8B      | RAB8B, member RAS oncogene family [Source:HGNC Symbol;Acc:HGNC:30273]                         | 377  | 1.06 | 0.0996 | 10.7 | 1.2E-26 | 1.3E-25 |
| ENSG00000149929 | HIRIP3     | HIRA interacting protein 3 [Source:HGNC Symbol;Acc:HGNC:4917]                                 | 533  | 0.88 | 0.0823 | 10.7 | 1.2E-26 | 1.2E-25 |
| ENSG00000090581 | GNPTG      | N-acetylglucosamine-1-phosphate transferase subunit gamma [Source:HGNC Symbol;Acc:HGNC:23026] | 799  | 0.73 | 0.0679 | 10.7 | 1.1E-26 | 1.1E-25 |
| ENSG00000090565 | RAB11FIP3  | RAB11 family interacting protein 3 [Source:HGNC Symbol;Acc:HGNC:17224]                        | 292  | 1.20 | 0.1123 | 10.7 | 1.1E-26 | 1.1E-25 |
| ENSG00000164405 | UQCRCQ     | ubiquinol-cytochrome c reductase complex III subunit VII [Source:HGNC Symbol;Acc:HGNC:29594]  | 1395 | 0.67 | 0.0625 | 10.7 | 8.5E-27 | 8.7E-26 |
| ENSG00000131015 | ULBP2      | UL16 binding protein 2 [Source:HGNC Symbol;Acc:HGNC:14894]                                    | 346  | 1.16 | 0.1086 | 10.7 | 8.4E-27 | 8.6E-26 |
| ENSG00000071282 | LMCD1      | LIM and cysteine rich domains 1 [Source:HGNC Symbol;Acc:HGNC:6633]                            | 308  | 1.17 | 0.1088 | 10.7 | 8.3E-27 | 8.5E-26 |
| ENSG00000106268 | NUDT1      | nudix hydrolase 1 [Source:HGNC Symbol;Acc:HGNC:8048]                                          | 1675 | 0.56 | 0.0519 | 10.7 | 8.0E-27 | 8.2E-26 |
| ENSG00000140691 | ARMC5      | armadillo repeat containing 5 [Source:HGNC Symbol;Acc:HGNC:25781]                             | 267  | 1.28 | 0.1190 | 10.7 | 8.0E-27 | 8.2E-26 |
| ENSG00000130487 | KLHDC7B    | kelch domain containing 7B [Source:HGNC Symbol;Acc:HGNC:25145]                                | 252  | 1.29 | 0.1202 | 10.7 | 7.9E-27 | 8.1E-26 |
| ENSG00000105137 | SYDE1      | synapse defective Rho GTPase homolog 1 [Source:HGNC Symbol;Acc:HGNC:25824]                    | 439  | 0.99 | 0.0921 | 10.7 | 6.9E-27 | 7.1E-26 |
| ENSG00000132429 | POPCD3     | popeye domain containing 3 [Source:HGNC Symbol;Acc:HGNC:17649]                                | 100  | 2.33 | 0.2170 | 10.7 | 6.6E-27 | 6.8E-26 |
| ENSG00000106591 | MRPL32     | mitochondrial ribosomal protein L32 [Source:HGNC Symbol;Acc:HGNC:14035]                       | 1926 | 0.54 | 0.0503 | 10.7 | 6.1E-27 | 6.3E-26 |
| ENSG00000099364 | FBXL19     | F-box and leucine rich repeat protein 19 [Source:HGNC Symbol;Acc:HGNC:25300]                  | 681  | 0.80 | 0.0746 | 10.7 | 6.1E-27 | 6.3E-26 |
| ENSG00000134508 | CABLES1    | Cdk5 and Abl enzyme substrate 1 [Source:HGNC Symbol;Acc:HGNC:25097]                           | 648  | 0.80 | 0.0744 | 10.7 | 6.0E-27 | 6.2E-26 |
| ENSG00000185697 | MYBL1      | MYB proto-oncogene like 1 [Source:HGNC Symbol;Acc:HGNC:7547]                                  | 648  | 0.85 | 0.0790 | 10.8 | 5.8E-27 | 6.0E-26 |
| ENSG00000156853 | ZNF689     | zinc finger protein 689 [Source:HGNC Symbol;Acc:HGNC:25173]                                   | 220  | 1.46 | 0.1349 | 10.8 | 3.7E-27 | 3.8E-26 |
| ENSG00000176953 | NFATC2IP   | nuclear factor of activated T cells 2 interacting protein [Source:HGNC Symbol;Acc:HGNC:25906] | 827  | 0.73 | 0.0680 | 10.8 | 3.5E-27 | 3.6E-26 |
| ENSG00000127585 | FBXL16     | F-box and leucine rich repeat protein 16 [Source:HGNC Symbol;Acc:HGNC:14150]                  | 84   | 2.60 | 0.2406 | 10.8 | 3.5E-27 | 3.6E-26 |
| ENSG00000132359 | RAP1GAP2   | RAP1 GTPase activating protein 2 [Source:HGNC Symbol;Acc:HGNC:29176]                          | 1306 | 0.60 | 0.0551 | 10.8 | 3.1E-27 | 3.2E-26 |



|                 |                 |                                                                                     |      |      |        |      |         |         |
|-----------------|-----------------|-------------------------------------------------------------------------------------|------|------|--------|------|---------|---------|
| ENSG00000160712 | IL6R            | interleukin 6 receptor [Source:HGNC Symbol;Acc:HGNC:6019]                           | 289  | 1.24 | 0.1145 | 10.8 | 2.4E-27 | 2.5E-26 |
| ENSG00000103152 | MPG             | N-methylpurine DNA glycosylase [Source:HGNC Symbol;Acc:HGNC:7211]                   | 322  | 1.15 | 0.1061 | 10.8 | 2.3E-27 | 2.4E-26 |
| ENSG00000175048 | ZDHHC14         | zinc finger DHHC-type palmitoyltransferase 14 [Source:HGNC Symbol;Acc:HGNC:20341]   | 130  | 1.88 | 0.1737 | 10.8 | 2.3E-27 | 2.4E-26 |
| ENSG00000141012 | GALNS           | galactosamine (N-acetyl)-6-sulfatase [Source:HGNC Symbol;Acc:HGNC:4122]             | 917  | 0.73 | 0.0675 | 10.8 | 2.1E-27 | 2.2E-26 |
| ENSG00000103126 | AXIN1           | axin 1 [Source:HGNC Symbol;Acc:HGNC:903]                                            | 598  | 0.86 | 0.0794 | 10.8 | 2.1E-27 | 2.1E-26 |
| ENSG00000051596 | THOC3           | THO complex 3 [Source:HGNC Symbol;Acc:HGNC:19072]                                   | 1384 | 0.59 | 0.0540 | 10.9 | 1.9E-27 | 2.0E-26 |
| ENSG00000113621 | TXNDC15         | thioredoxin domain containing 15 [Source:HGNC Symbol;Acc:HGNC:20652]                | 965  | 0.71 | 0.0653 | 10.9 | 1.8E-27 | 1.8E-26 |
| ENSG00000123992 | DNPEP           | aspartyl aminopeptidase [Source:HGNC Symbol;Acc:HGNC:2981]                          | 1789 | 0.55 | 0.0505 | 10.9 | 1.7E-27 | 1.8E-26 |
| ENSG00000136002 | ARHGEF4         | Rho guanine nucleotide exchange factor 4 [Source:HGNC Symbol;Acc:HGNC:684]          | 324  | 1.17 | 0.1072 | 10.9 | 1.5E-27 | 1.5E-26 |
| ENSG00000109814 | UGDH            | UDP-glucose 6-dehydrogenase [Source:HGNC Symbol;Acc:HGNC:12525]                     | 708  | 0.82 | 0.0752 | 10.9 | 1.2E-27 | 1.2E-26 |
| ENSG00000146066 | HIGD2A          | HIG1 hypoxia inducible domain family member 2A [Source:HGNC Symbol;Acc:HGNC:28311]  | 432  | 1.00 | 0.0916 | 10.9 | 1.1E-27 | 1.2E-26 |
| ENSG00000065308 | TRAM2           | translocation associated membrane protein 2 [Source:HGNC Symbol;Acc:HGNC:16855]     | 1774 | 0.56 | 0.0512 | 10.9 | 1.1E-27 | 1.1E-26 |
| ENSG00000162073 | PAQR4           | progesterin and adipoQ receptor family member 4 [Source:HGNC Symbol;Acc:HGNC:26386] | 243  | 1.35 | 0.1238 | 10.9 | 1.1E-27 | 1.1E-26 |
| ENSG00000184743 | ATL3            | atlastin GTPase 3 [Source:HGNC Symbol;Acc:HGNC:24526]                               | 1468 | 0.55 | 0.0508 | 10.9 | 1.0E-27 | 1.1E-26 |
| ENSG00000272047 | GTF2H5          | general transcription factor IIH subunit 5 [Source:HGNC Symbol;Acc:HGNC:21157]      | 1115 | 0.64 | 0.0581 | 10.9 | 8.1E-28 | 8.5E-27 |
| ENSG00000065923 | SLC9A7          | solute carrier family 9 member A7 [Source:HGNC Symbol;Acc:HGNC:17123]               | 403  | 1.08 | 0.0988 | 10.9 | 7.7E-28 | 8.2E-27 |
| ENSG00000125347 | IRF1            | interferon regulatory factor 1 [Source:HGNC Symbol;Acc:HGNC:6116]                   | 510  | 0.92 | 0.0841 | 10.9 | 7.3E-28 | 7.7E-27 |
| ENSG00000225383 | SFTA1P          | surfactant associated 1, lncRNA [Source:HGNC Symbol;Acc:HGNC:18383]                 | 74   | 2.97 | 0.2711 | 10.9 | 7.0E-28 | 7.4E-27 |
| ENSG00000127124 | HIVEP3          | HIVEP zinc finger 3 [Source:HGNC Symbol;Acc:HGNC:13561]                             | 143  | 1.85 | 0.1684 | 11.0 | 5.6E-28 | 6.0E-27 |
| ENSG00000155508 | CNOT8           | CCR4-NOT transcription complex subunit 8 [Source:HGNC Symbol;Acc:HGNC:9207]         | 1235 | 0.60 | 0.0547 | 11.0 | 5.6E-28 | 6.0E-27 |
| ENSG00000250697 | ENSG00000250697 | novel transcript                                                                    | 98   | 6.69 | 0.6097 | 11.0 | 5.4E-28 | 5.7E-27 |
| ENSG00000060558 | GNA15           | G protein subunit alpha 15 [Source:HGNC Symbol;Acc:HGNC:4383]                       | 115  | 2.22 | 0.2021 | 11.0 | 4.6E-28 | 4.9E-27 |
| ENSG00000222041 | CYTOR           | cytoskeleton regulator RNA [Source:HGNC Symbol;Acc:HGNC:28717]                      | 481  | 0.97 | 0.0885 | 11.0 | 4.2E-28 | 4.5E-27 |
| ENSG00000184979 | USP18           | ubiquitin specific peptidase 18 [Source:HGNC Symbol;Acc:HGNC:12616]                 | 1257 | 0.65 | 0.0591 | 11.0 | 4.0E-28 | 4.3E-27 |
| ENSG00000154102 | C16orf74        | chromosome 16 open reading frame 74 [Source:HGNC Symbol;Acc:HGNC:23362]             | 131  | 1.93 | 0.1752 | 11.0 | 3.9E-28 | 4.1E-27 |
| ENSG00000135083 | CCNJL           | cyclin J like [Source:HGNC Symbol;Acc:HGNC:25876]                                   | 401  | 1.03 | 0.0937 | 11.0 | 3.5E-28 | 3.8E-27 |
| ENSG00000008282 | SYPL1           | synaptophysin like 1 [Source:HGNC Symbol;Acc:HGNC:11507]                            | 1522 | 0.58 | 0.0530 | 11.0 | 3.3E-28 | 3.6E-27 |
| ENSG00000134326 | CMPK2           | cytidine/uridine monophosphate kinase 2 [Source:HGNC Symbol;Acc:HGNC:27015]         | 569  | 0.97 | 0.0885 | 11.0 | 3.3E-28 | 3.6E-27 |
| ENSG00000258405 | ZNF578          | zinc finger protein 578 [Source:HGNC Symbol;Acc:HGNC:26449]                         | 81   | 2.65 | 0.2410 | 11.0 | 3.3E-28 | 3.5E-27 |
| ENSG00000104907 | TRMT1           | tRNA methyltransferase 1 [Source:HGNC Symbol;Acc:HGNC:25980]                        | 1181 | 0.63 | 0.0573 | 11.0 | 2.8E-28 | 3.0E-27 |
| ENSG00000006194 | ZNF263          | zinc finger protein 263 [Source:HGNC Symbol;Acc:HGNC:13056]                         | 631  | 0.86 | 0.0782 | 11.0 | 2.4E-28 | 2.6E-27 |
| ENSG00000164520 | RAET1E          | retinoic acid early transcript 1E [Source:HGNC Symbol;Acc:HGNC:16793]               | 66   | 3.50 | 0.3172 | 11.0 | 2.3E-28 | 2.5E-27 |
| ENSG00000221890 | NPTXR           | neuronal pentraxin receptor [Source:HGNC Symbol;Acc:HGNC:7954]                      | 837  | 0.76 | 0.0690 | 11.1 | 1.8E-28 | 2.0E-27 |
| ENSG00000115648 | MLPH            | melanophilin [Source:HGNC Symbol;Acc:HGNC:29643]                                    | 120  | 2.12 | 0.1915 | 11.1 | 1.4E-28 | 1.6E-27 |
| ENSG00000115355 | CCDC88A         | coiled-coil domain containing 88A [Source:HGNC Symbol;Acc:HGNC:25523]               | 217  | 1.53 | 0.1377 | 11.1 | 1.4E-28 | 1.6E-27 |
| ENSG00000108819 | PPP1R9B         | protein phosphatase 1 regulatory subunit 9B [Source:HGNC Symbol;Acc:HGNC:9298]      | 1446 | 0.60 | 0.0537 | 11.1 | 1.4E-28 | 1.5E-27 |
| ENSG00000241316 | SUCLG2-AS1      | SUCLG2 antisense RNA 1 (head to head) [Source:HGNC Symbol;Acc:HGNC:49643]           | 108  | 2.29 | 0.2062 | 11.1 | 1.4E-28 | 1.5E-27 |
| ENSG00000170425 | ADORA2B         | adenosine A2b receptor [Source:HGNC Symbol;Acc:HGNC:264]                            | 699  | 0.80 | 0.0719 | 11.1 | 1.3E-28 | 1.4E-27 |
| ENSG00000137878 | GCOM1           | GRINL1A complex locus 1 [Source:HGNC Symbol;Acc:HGNC:26424]                         | 81   | 2.86 | 0.2575 | 11.1 | 1.0E-28 | 1.1E-27 |
| ENSG00000197912 | SPG7            | SPG7 matrix AAA peptidase subunit, paraplegin [Source:HGNC Symbol;Acc:HGNC:11237]   | 1357 | 0.59 | 0.0531 | 11.1 | 9.0E-29 | 9.8E-28 |
| ENSG00000174109 | C16orf91        | chromosome 16 open reading frame 91 [Source:HGNC Symbol;Acc:HGNC:27558]             | 380  | 1.16 | 0.1036 | 11.2 | 7.1E-29 | 7.7E-28 |
| ENSG00000172663 | TMEM134         | transmembrane protein 134 [Source:HGNC Symbol;Acc:HGNC:26142]                       | 714  | 0.80 | 0.0716 | 11.2 | 6.1E-29 | 6.7E-28 |

|                 |                 |                                                                                                        |      |      |        |      |         |         |
|-----------------|-----------------|--------------------------------------------------------------------------------------------------------|------|------|--------|------|---------|---------|
| ENSG00000154118 | JPH3            | junctophilin 3 [Source:HGNC Symbol;Acc:HGNC:14203]                                                     | 382  | 1.11 | 0.0989 | 11.2 | 5.6E-29 | 6.1E-28 |
| ENSG00000187231 | SESTD1          | SEC14 and spectrin domain containing 1 [Source:HGNC Symbol;Acc:HGNC:18379]                             | 263  | 1.34 | 0.1200 | 11.2 | 5.6E-29 | 6.1E-28 |
| ENSG00000128829 | EIF2AK4         | eukaryotic translation initiation factor 2 alpha kinase 4 [Source:HGNC Symbol;Acc:HGNC:19687]          | 1086 | 0.66 | 0.0589 | 11.2 | 5.5E-29 | 6.1E-28 |
| ENSG00000179833 | SERTAD2         | SERTA domain containing 2 [Source:HGNC Symbol;Acc:HGNC:30784]                                          | 1860 | 0.54 | 0.0483 | 11.2 | 5.3E-29 | 5.8E-28 |
| ENSG00000113716 | HMGXB3          | HMG-box containing 3 [Source:HGNC Symbol;Acc:HGNC:28982]                                               | 1686 | 0.57 | 0.0507 | 11.2 | 5.0E-29 | 5.4E-28 |
| ENSG00000005700 | IBTK            | inhibitor of Bruton tyrosine kinase [Source:HGNC Symbol;Acc:HGNC:17853]                                | 701  | 0.86 | 0.0767 | 11.2 | 4.9E-29 | 5.4E-28 |
| ENSG00000244026 | FAM86DP         | family with sequence similarity 86 member D, pseudogene [Source:HGNC Symbol;Acc:HGNC:32659]            | 322  | 1.23 | 0.1104 | 11.2 | 4.9E-29 | 5.4E-28 |
| ENSG00000198729 | PPP1R14C        | protein phosphatase 1 regulatory inhibitor subunit 14C [Source:HGNC Symbol;Acc:HGNC:14952]             | 940  | 0.71 | 0.0635 | 11.2 | 3.9E-29 | 4.4E-28 |
| ENSG00000176697 | BDNF            | brain derived neurotrophic factor [Source:HGNC Symbol;Acc:HGNC:1033]                                   | 203  | 1.58 | 0.1406 | 11.2 | 3.8E-29 | 4.2E-28 |
| ENSG00000110395 | CBL             | Cbl proto-oncogene [Source:HGNC Symbol;Acc:HGNC:1541]                                                  | 1109 | 0.68 | 0.0606 | 11.2 | 3.7E-29 | 4.1E-28 |
| ENSG00000128951 | DUT             | deoxyuridine triphosphatase [Source:HGNC Symbol;Acc:HGNC:3078]                                         | 2091 | 0.54 | 0.0480 | 11.2 | 3.5E-29 | 3.8E-28 |
| ENSG00000163840 | DTX3L           | deltex E3 ubiquitin ligase 3L [Source:HGNC Symbol;Acc:HGNC:30323]                                      | 1797 | 0.56 | 0.0502 | 11.2 | 2.3E-29 | 2.6E-28 |
| ENSG00000113594 | LIFR            | LIF receptor subunit alpha [Source:HGNC Symbol;Acc:HGNC:6597]                                          | 155  | 1.79 | 0.1586 | 11.3 | 1.6E-29 | 1.8E-28 |
| ENSG00000070770 | CSNK2A2         | casein kinase 2 alpha 2 [Source:HGNC Symbol;Acc:HGNC:2459]                                             | 1144 | 0.73 | 0.0646 | 11.3 | 1.4E-29 | 1.5E-28 |
| ENSG00000120306 | CYSTM1          | cysteine rich transmembrane module containing 1 [Source:HGNC Symbol;Acc:HGNC:30239]                    | 1040 | 0.72 | 0.0639 | 11.3 | 1.1E-29 | 1.3E-28 |
| ENSG00000128342 | LIF             | LIF interleukin 6 family cytokine [Source:HGNC Symbol;Acc:HGNC:6596]                                   | 179  | 1.79 | 0.1582 | 11.3 | 9.3E-30 | 1.0E-28 |
| ENSG00000142632 | ARHGEF19        | Rho guanine nucleotide exchange factor 19 [Source:HGNC Symbol;Acc:HGNC:26604]                          | 71   | 3.40 | 0.2990 | 11.4 | 5.4E-30 | 6.1E-29 |
| ENSG00000147224 | PRPS1           | phosphoribosyl pyrophosphate synthetase 1 [Source:HGNC Symbol;Acc:HGNC:9462]                           | 1910 | 0.53 | 0.0465 | 11.4 | 5.2E-30 | 5.8E-29 |
| ENSG00000164236 | ANKRD33B        | ankyrin repeat domain 33B [Source:HGNC Symbol;Acc:HGNC:35240]                                          | 318  | 1.21 | 0.1063 | 11.4 | 4.9E-30 | 5.5E-29 |
| ENSG00000173327 | MAP3K11         | mitogen-activated protein kinase kinase kinase 11 [Source:HGNC Symbol;Acc:HGNC:6850]                   | 2158 | 0.54 | 0.0472 | 11.4 | 4.3E-30 | 4.9E-29 |
| ENSG00000126524 | SBDS            | SBDS ribosome maturation factor [Source:HGNC Symbol;Acc:HGNC:19440]                                    | 1899 | 0.52 | 0.0457 | 11.4 | 3.8E-30 | 4.3E-29 |
| ENSG00000165272 | AQP3            | aquaporin 3 (Gill blood group) [Source:HGNC Symbol;Acc:HGNC:636]                                       | 420  | 1.07 | 0.0939 | 11.4 | 3.2E-30 | 3.6E-29 |
| ENSG00000230615 | ENSG00000230615 | novel transcript                                                                                       | 64   | 4.30 | 0.3763 | 11.4 | 3.0E-30 | 3.4E-29 |
| ENSG00000053254 | FOXN3           | forkhead box N3 [Source:HGNC Symbol;Acc:HGNC:1928]                                                     | 190  | 1.61 | 0.1401 | 11.5 | 2.2E-30 | 2.5E-29 |
| ENSG00000169914 | OTUD3           | OTU deubiquitinase 3 [Source:HGNC Symbol;Acc:HGNC:29038]                                               | 639  | 0.87 | 0.0758 | 11.5 | 2.1E-30 | 2.4E-29 |
| ENSG00000128626 | MRPS12          | mitochondrial ribosomal protein S12 [Source:HGNC Symbol;Acc:HGNC:10380]                                | 1158 | 0.70 | 0.0608 | 11.5 | 2.1E-30 | 2.4E-29 |
| ENSG00000174749 | FAM241A         | family with sequence similarity 241 member A [Source:HGNC Symbol;Acc:HGNC:26813]                       | 622  | 0.99 | 0.0860 | 11.5 | 1.2E-30 | 1.4E-29 |
| ENSG00000117069 | ST6GALNAC3      | ST6 N-acetylgalactosaminide alpha-2,6-sialyltransferase 5 [Source:HGNC Symbol;Acc:HGNC:19342]          | 134  | 1.98 | 0.1716 | 11.5 | 1.1E-30 | 1.2E-29 |
| ENSG00000173706 | HEG1            | heart development protein with EGF like domains 1 [Source:HGNC Symbol;Acc:HGNC:29227]                  | 966  | 0.77 | 0.0666 | 11.5 | 9.0E-31 | 1.0E-29 |
| ENSG00000143418 | CERS2           | ceramide synthase 2 [Source:HGNC Symbol;Acc:HGNC:14076]                                                | 1380 | 0.61 | 0.0530 | 11.6 | 7.3E-31 | 8.5E-30 |
| ENSG00000187741 | FANCA           | FA complementation group A [Source:HGNC Symbol;Acc:HGNC:3582]                                          | 608  | 0.90 | 0.0776 | 11.6 | 5.9E-31 | 6.8E-30 |
| ENSG00000240065 | PSMB9           | proteasome 20S subunit beta 9 [Source:HGNC Symbol;Acc:HGNC:9546]                                       | 875  | 0.78 | 0.0675 | 11.6 | 5.5E-31 | 6.4E-30 |
| ENSG00000103174 | NAGPA           | N-acetylglucosamine-1-phosphodiester alpha-N-acetylglucosaminidase [Source:HGNC Symbol;Acc:HGNC:20043] | 327  | 1.25 | 0.1077 | 11.6 | 5.3E-31 | 6.1E-30 |
| ENSG00000082516 | GEMIN5          | gem nuclear organelle associated protein 5 [Source:HGNC Symbol;Acc:HGNC:20043]                         | 1081 | 0.75 | 0.0647 | 11.6 | 4.9E-31 | 5.7E-30 |
| ENSG00000125744 | RTN2            | reticulon 2 [Source:HGNC Symbol;Acc:HGNC:10468]                                                        | 171  | 1.74 | 0.1500 | 11.6 | 4.9E-31 | 5.7E-30 |
| ENSG00000058729 | RIOK2           | RIO kinase 2 [Source:HGNC Symbol;Acc:HGNC:18999]                                                       | 519  | 0.97 | 0.0840 | 11.6 | 4.2E-31 | 4.9E-30 |
| ENSG00000118564 | FBXL5           | F-box and leucine rich repeat protein 5 [Source:HGNC Symbol;Acc:HGNC:13602]                            | 1096 | 0.69 | 0.0593 | 11.6 | 4.2E-31 | 4.9E-30 |
| ENSG00000102908 | NFAT5           | nuclear factor of activated T cells 5 [Source:HGNC Symbol;Acc:HGNC:7774]                               | 1137 | 0.67 | 0.0580 | 11.6 | 3.8E-31 | 4.4E-30 |
| ENSG00000168874 | ATOX1           | atonal bHLH transcription factor 8 [Source:HGNC Symbol;Acc:HGNC:24126]                                 | 122  | 2.25 | 0.1937 | 11.6 | 3.5E-31 | 4.0E-30 |
| ENSG00000161642 | ZNF385A         | zinc finger protein 385A [Source:HGNC Symbol;Acc:HGNC:17521]                                           | 621  | 0.95 | 0.0819 | 11.6 | 3.3E-31 | 3.8E-30 |
| ENSG00000204949 | FAM83A-AS1      | FAM83A antisense RNA 1 [Source:HGNC Symbol;Acc:HGNC:48658]                                             | 70   | 4.19 | 0.3596 | 11.6 | 2.5E-31 | 2.9E-30 |
| ENSG00000160818 | GPATCH4         | G-patch domain containing 4 [Source:HGNC Symbol;Acc:HGNC:25982]                                        | 1628 | 0.57 | 0.0486 | 11.6 | 2.4E-31 | 2.8E-30 |

|                 |            |                                                                                                      |      |      |        |      |         |         |
|-----------------|------------|------------------------------------------------------------------------------------------------------|------|------|--------|------|---------|---------|
| ENSG00000225648 | SBDSP1     | SBDS pseudogene 1 [Source:HGNC Symbol;Acc:HGNC:21646]                                                | 718  | 0.83 | 0.0708 | 11.7 | 2.1E-31 | 2.5E-30 |
| ENSG00000114767 | RRP9       | ribosomal RNA processing 9, U3 small nucleolar RNA binding protein [Source:HGNC Symbol;Acc:HGNC:1    | 1216 | 0.68 | 0.0581 | 11.7 | 1.6E-31 | 1.9E-30 |
| ENSG00000171889 | MIR31HG    | MIR31 host gene [Source:HGNC Symbol;Acc:HGNC:37187]                                                  | 204  | 1.60 | 0.1371 | 11.7 | 1.5E-31 | 1.8E-30 |
| ENSG00000168461 | RAB31      | RAB31, member RAS oncogene family [Source:HGNC Symbol;Acc:HGNC:9771]                                 | 802  | 0.84 | 0.0719 | 11.7 | 1.4E-31 | 1.7E-30 |
| ENSG00000167657 | DAPK3      | death associated protein kinase 3 [Source:HGNC Symbol;Acc:HGNC:2676]                                 | 1505 | 0.60 | 0.0511 | 11.7 | 1.2E-31 | 1.4E-30 |
| ENSG00000157350 | ST3GAL2    | ST3 beta-galactoside alpha-2,3-sialyltransferase 2 [Source:HGNC Symbol;Acc:HGNC:10863]               | 452  | 1.08 | 0.0921 | 11.7 | 1.2E-31 | 1.4E-30 |
| ENSG00000140464 | PML        | PML nuclear body scaffold [Source:HGNC Symbol;Acc:HGNC:9113]                                         | 1061 | 0.72 | 0.0613 | 11.7 | 7.8E-32 | 9.2E-31 |
| ENSG00000124496 | TRERF1     | transcriptional regulating factor 1 [Source:HGNC Symbol;Acc:HGNC:18273]                              | 243  | 1.46 | 0.1239 | 11.7 | 7.4E-32 | 8.8E-31 |
| ENSG00000151461 | UPF2       | UPF2 regulator of nonsense mediated mRNA decay [Source:HGNC Symbol;Acc:HGNC:17854]                   | 843  | 0.78 | 0.0661 | 11.8 | 6.8E-32 | 8.1E-31 |
| ENSG00000144711 | IQSEC1     | IQ motif and Sec7 domain ArfGEF 1 [Source:HGNC Symbol;Acc:HGNC:29112]                                | 1008 | 0.73 | 0.0620 | 11.8 | 6.4E-32 | 7.6E-31 |
| ENSG00000141101 | NOB1       | NIN1 (RPN12) binding protein 1 homolog [Source:HGNC Symbol;Acc:HGNC:29540]                           | 1741 | 0.57 | 0.0487 | 11.8 | 6.3E-32 | 7.5E-31 |
| ENSG00000165661 | QSOX2      | quiescin sulfhydryl oxidase 2 [Source:HGNC Symbol;Acc:HGNC:30249]                                    | 1715 | 0.61 | 0.0516 | 11.8 | 6.2E-32 | 7.4E-31 |
| ENSG00000198853 | RUSC2      | RUN and SH3 domain containing 2 [Source:HGNC Symbol;Acc:HGNC:23625]                                  | 1322 | 0.64 | 0.0545 | 11.8 | 4.9E-32 | 5.9E-31 |
| ENSG00000104324 | CPQ        | carboxypeptidase Q [Source:HGNC Symbol;Acc:HGNC:16910]                                               | 85   | 2.87 | 0.2437 | 11.8 | 4.8E-32 | 5.7E-31 |
| ENSG00000137038 | DMAC1      | distal membrane arm assembly complex 1 [Source:HGNC Symbol;Acc:HGNC:30536]                           | 990  | 0.80 | 0.0676 | 11.8 | 4.1E-32 | 4.9E-31 |
| ENSG00000095397 | WHRN       | whirlin [Source:HGNC Symbol;Acc:HGNC:16361]                                                          | 526  | 0.99 | 0.0836 | 11.8 | 3.9E-32 | 4.7E-31 |
| ENSG00000143147 | GPR161     | G protein-coupled receptor 161 [Source:HGNC Symbol;Acc:HGNC:23694]                                   | 304  | 1.29 | 0.1095 | 11.8 | 3.7E-32 | 4.5E-31 |
| ENSG00000226686 | LINC01535  | long intergenic non-protein coding RNA 1535 [Source:HGNC Symbol;Acc:HGNC:51282]                      | 71   | 4.43 | 0.3751 | 11.8 | 3.7E-32 | 4.4E-31 |
| ENSG00000173621 | LRFN4      | leucine rich repeat and fibronectin type III domain containing 4 [Source:HGNC Symbol;Acc:HGNC:28456] | 536  | 1.01 | 0.0850 | 11.9 | 2.1E-32 | 2.5E-31 |
| ENSG00000103429 | BFAR       | bifunctional apoptosis regulator [Source:HGNC Symbol;Acc:HGNC:17613]                                 | 1654 | 0.63 | 0.0533 | 11.9 | 2.1E-32 | 2.5E-31 |
| ENSG00000140718 | FTO        | FTO alpha-ketoglutarate dependent dioxygenase [Source:HGNC Symbol;Acc:HGNC:24678]                    | 659  | 0.93 | 0.0783 | 11.9 | 1.7E-32 | 2.1E-31 |
| ENSG00000119969 | HELLS      | helicase, lymphoid specific [Source:HGNC Symbol;Acc:HGNC:4861]                                       | 879  | 0.77 | 0.0646 | 11.9 | 1.7E-32 | 2.1E-31 |
| ENSG00000167977 | KCTD5      | potassium channel tetramerization domain containing 5 [Source:HGNC Symbol;Acc:HGNC:21423]            | 1112 | 0.69 | 0.0585 | 11.9 | 1.6E-32 | 1.9E-31 |
| ENSG00000227345 | PARG       | poly(ADP-ribose) glycohydrolase [Source:HGNC Symbol;Acc:HGNC:8605]                                   | 491  | 1.03 | 0.0871 | 11.9 | 1.6E-32 | 1.9E-31 |
| ENSG00000197249 | SERPINA1   | serpin family A member 1 [Source:HGNC Symbol;Acc:HGNC:8941]                                          | 80   | 3.33 | 0.2802 | 11.9 | 1.5E-32 | 1.8E-31 |
| ENSG00000140688 | RUSF1      | RUS family member 1 [Source:HGNC Symbol;Acc:HGNC:25848]                                              | 798  | 0.82 | 0.0691 | 11.9 | 1.4E-32 | 1.7E-31 |
| ENSG00000275216 | ENSG000002 | novel transcript                                                                                     | 1783 | 0.60 | 0.0508 | 11.9 | 1.4E-32 | 1.7E-31 |
| ENSG00000101365 | IDH3B      | isocitrate dehydrogenase (NAD(+)) 3 non-catalytic subunit beta [Source:HGNC Symbol;Acc:HGNC:5385]    | 3707 | 0.51 | 0.0425 | 11.9 | 1.3E-32 | 1.6E-31 |
| ENSG00000113194 | FAF2       | Fas associated factor family member 2 [Source:HGNC Symbol;Acc:HGNC:24666]                            | 2578 | 0.55 | 0.0463 | 11.9 | 1.2E-32 | 1.5E-31 |
| ENSG00000276850 | ENSG000002 | novel transcript                                                                                     | 771  | 0.83 | 0.0701 | 11.9 | 1.2E-32 | 1.5E-31 |
| ENSG00000139641 | ESYT1      | extended synaptotagmin 1 [Source:HGNC Symbol;Acc:HGNC:29534]                                         | 2259 | 0.51 | 0.0430 | 11.9 | 1.0E-32 | 1.3E-31 |
| ENSG00000171132 | PRKCE      | protein kinase C epsilon [Source:HGNC Symbol;Acc:HGNC:9401]                                          | 346  | 1.23 | 0.1035 | 11.9 | 8.9E-33 | 1.1E-31 |
| ENSG00000167693 | NXN        | nucleoredoxin [Source:HGNC Symbol;Acc:HGNC:18008]                                                    | 2320 | 0.52 | 0.0432 | 11.9 | 7.1E-33 | 8.7E-32 |
| ENSG00000187608 | ISG15      | ISG15 ubiquitin like modifier [Source:HGNC Symbol;Acc:HGNC:4053]                                     | 7129 | 0.95 | 0.0793 | 12.0 | 6.4E-33 | 7.8E-32 |
| ENSG00000106571 | GLI3       | GLI family zinc finger 3 [Source:HGNC Symbol;Acc:HGNC:4319]                                          | 491  | 1.03 | 0.0858 | 12.0 | 4.9E-33 | 6.0E-32 |
| ENSG00000101558 | VAPA       | VAMP associated protein A [Source:HGNC Symbol;Acc:HGNC:12648]                                        | 3614 | 0.53 | 0.0440 | 12.0 | 4.8E-33 | 6.0E-32 |
| ENSG00000238266 | LINC00707  | long intergenic non-protein coding RNA 707 [Source:HGNC Symbol;Acc:HGNC:44691]                       | 100  | 2.73 | 0.2278 | 12.0 | 4.7E-33 | 5.8E-32 |
| ENSG00000157045 | NTAN1      | N-terminal asparagine amidase [Source:HGNC Symbol;Acc:HGNC:29909]                                    | 474  | 1.08 | 0.0904 | 12.0 | 4.6E-33 | 5.7E-32 |
| ENSG00000196639 | HRH1       | histamine receptor H1 [Source:HGNC Symbol;Acc:HGNC:5182]                                             | 228  | 1.58 | 0.1315 | 12.0 | 3.6E-33 | 4.4E-32 |
| ENSG00000127129 | EDN2       | endothelin 2 [Source:HGNC Symbol;Acc:HGNC:3177]                                                      | 77   | 3.45 | 0.2872 | 12.0 | 3.6E-33 | 4.4E-32 |
| ENSG00000166452 | AKIP1      | A-kinase interacting protein 1 [Source:HGNC Symbol;Acc:HGNC:1170]                                    | 614  | 0.92 | 0.0767 | 12.0 | 3.1E-33 | 3.9E-32 |
| ENSG00000197182 | MIRLET7BH  | MIRLET7B host gene [Source:HGNC Symbol;Acc:HGNC:37189]                                               | 79   | 3.42 | 0.2850 | 12.0 | 3.0E-33 | 3.8E-32 |

|                 |          |                                                                                                                    |      |      |        |      |         |         |
|-----------------|----------|--------------------------------------------------------------------------------------------------------------------|------|------|--------|------|---------|---------|
| ENSG00000204175 | GPRIN2   | G protein regulated inducer of neurite outgrowth 2 [Source:HGNC Symbol;Acc:HGNC:23730]                             | 231  | 1.58 | 0.1312 | 12.0 | 2.9E-33 | 3.6E-32 |
| ENSG00000185386 | MAPK11   | mitogen-activated protein kinase 11 [Source:HGNC Symbol;Acc:HGNC:6873]                                             | 691  | 0.89 | 0.0740 | 12.0 | 2.7E-33 | 3.3E-32 |
| ENSG00000148426 | PROSER2  | proline and serine rich 2 [Source:HGNC Symbol;Acc:HGNC:23728]                                                      | 348  | 1.22 | 0.1012 | 12.0 | 2.6E-33 | 3.3E-32 |
| ENSG00000221923 | ZNF880   | zinc finger protein 880 [Source:HGNC Symbol;Acc:HGNC:37249]                                                        | 278  | 1.46 | 0.1214 | 12.1 | 1.9E-33 | 2.4E-32 |
| ENSG00000157557 | ETS2     | ETS proto-oncogene 2, transcription factor [Source:HGNC Symbol;Acc:HGNC:3489]                                      | 2112 | 0.56 | 0.0464 | 12.1 | 1.0E-33 | 1.3E-32 |
| ENSG00000110104 | CCDC86   | coiled-coil domain containing 86 [Source:HGNC Symbol;Acc:HGNC:28359]                                               | 1424 | 0.63 | 0.0519 | 12.1 | 9.9E-34 | 1.2E-32 |
| ENSG00000052749 | RRP12    | ribosomal RNA processing 12 homolog [Source:HGNC Symbol;Acc:HGNC:29100]                                            | 1930 | 0.56 | 0.0461 | 12.1 | 9.9E-34 | 1.2E-32 |
| ENSG00000125354 | SEPTIN6  | septin 6 [Source:HGNC Symbol;Acc:HGNC:15848]                                                                       | 797  | 0.82 | 0.0675 | 12.1 | 9.8E-34 | 1.2E-32 |
| ENSG00000113369 | ARRDC3   | arrestin domain containing 3 [Source:HGNC Symbol;Acc:HGNC:29263]                                                   | 950  | 0.82 | 0.0674 | 12.1 | 9.3E-34 | 1.2E-32 |
| ENSG00000133216 | EPHB2    | EPH receptor B2 [Source:HGNC Symbol;Acc:HGNC:3393]                                                                 | 670  | 0.91 | 0.0752 | 12.1 | 9.3E-34 | 1.2E-32 |
| ENSG00000182179 | UBA7     | ubiquitin like modifier activating enzyme 7 [Source:HGNC Symbol;Acc:HGNC:12471]                                    | 374  | 1.20 | 0.0986 | 12.1 | 7.9E-34 | 1.0E-32 |
| ENSG00000099381 | SETD1A   | SET domain containing 1A, histone lysine methyltransferase [Source:HGNC Symbol;Acc:HGNC:29010]                     | 858  | 0.80 | 0.0659 | 12.1 | 6.2E-34 | 7.8E-33 |
| ENSG00000166897 | ELFN2    | extracellular leucine rich repeat and fibronectin type III domain containing 2 [Source:HGNC Symbol;Acc:HGNC:25393] | 125  | 2.39 | 0.1966 | 12.2 | 5.6E-34 | 7.1E-33 |
| ENSG00000240225 | ZNF542P  | zinc finger protein 542, pseudogene [Source:HGNC Symbol;Acc:HGNC:25393]                                            | 372  | 1.21 | 0.0994 | 12.2 | 4.4E-34 | 5.6E-33 |
| ENSG00000022267 | FHL1     | four and a half LIM domains 1 [Source:HGNC Symbol;Acc:HGNC:3702]                                                   | 303  | 1.42 | 0.1165 | 12.2 | 2.3E-34 | 3.0E-33 |
| ENSG00000103249 | CLCN7    | chloride voltage-gated channel 7 [Source:HGNC Symbol;Acc:HGNC:2025]                                                | 945  | 0.80 | 0.0651 | 12.2 | 2.1E-34 | 2.7E-33 |
| ENSG00000103245 | CIAO3    | cytosolic iron-sulfur assembly component 3 [Source:HGNC Symbol;Acc:HGNC:14179]                                     | 508  | 1.12 | 0.0919 | 12.2 | 2.0E-34 | 2.5E-33 |
| ENSG00000101333 | PLCB4    | phospholipase C beta 4 [Source:HGNC Symbol;Acc:HGNC:9059]                                                          | 96   | 5.92 | 0.4834 | 12.2 | 1.8E-34 | 2.3E-33 |
| ENSG00000085721 | RRN3     | RRN3 homolog, RNA polymerase I transcription factor [Source:HGNC Symbol;Acc:HGNC:30346]                            | 1643 | 0.62 | 0.0503 | 12.3 | 1.5E-34 | 1.9E-33 |
| ENSG00000162076 | FLYWCH2  | FLYWCH family member 2 [Source:HGNC Symbol;Acc:HGNC:25178]                                                         | 359  | 1.33 | 0.1083 | 12.3 | 1.1E-34 | 1.4E-33 |
| ENSG00000169592 | INO80E   | INO80 complex subunit E [Source:HGNC Symbol;Acc:HGNC:26905]                                                        | 534  | 1.05 | 0.0850 | 12.3 | 9.4E-35 | 1.2E-33 |
| ENSG00000168487 | BMP1     | bone morphogenetic protein 1 [Source:HGNC Symbol;Acc:HGNC:1067]                                                    | 1523 | 0.67 | 0.0548 | 12.3 | 9.1E-35 | 1.2E-33 |
| ENSG00000144583 | MARCHF4  | membrane associated ring-CH-type finger 4 [Source:HGNC Symbol;Acc:HGNC:29269]                                      | 91   | 3.18 | 0.2581 | 12.3 | 7.9E-35 | 1.0E-33 |
| ENSG00000038532 | CLEC16A  | C-type lectin domain containing 16A [Source:HGNC Symbol;Acc:HGNC:29013]                                            | 511  | 1.04 | 0.0840 | 12.3 | 6.8E-35 | 8.7E-34 |
| ENSG00000122691 | TWIST1   | twist family bHLH transcription factor 1 [Source:HGNC Symbol;Acc:HGNC:12428]                                       | 119  | 2.45 | 0.1990 | 12.3 | 6.3E-35 | 8.1E-34 |
| ENSG00000106603 | COA1     | cytochrome c oxidase assembly factor 1 homolog [Source:HGNC Symbol;Acc:HGNC:21868]                                 | 1872 | 0.58 | 0.0467 | 12.3 | 5.2E-35 | 6.8E-34 |
| ENSG00000095380 | NANS     | N-acetylneuraminase synthase [Source:HGNC Symbol;Acc:HGNC:19237]                                                   | 1315 | 0.72 | 0.0584 | 12.3 | 5.2E-35 | 6.8E-34 |
| ENSG00000228232 | GAPDH1   | glyceraldehyde-3-phosphate dehydrogenase pseudogene 1 [Source:HGNC Symbol;Acc:HGNC:4159]                           | 782  | 0.89 | 0.0718 | 12.3 | 5.0E-35 | 6.5E-34 |
| ENSG00000144824 | PHLDB2   | pleckstrin homology like domain family B member 2 [Source:HGNC Symbol;Acc:HGNC:29573]                              | 3301 | 0.55 | 0.0445 | 12.4 | 4.3E-35 | 5.6E-34 |
| ENSG00000169604 | ANTXR1   | ANTXR cell adhesion molecule 1 [Source:HGNC Symbol;Acc:HGNC:21014]                                                 | 1847 | 0.58 | 0.0466 | 12.4 | 4.0E-35 | 5.2E-34 |
| ENSG00000167815 | PRDX2    | peroxiredoxin 2 [Source:HGNC Symbol;Acc:HGNC:9353]                                                                 | 1031 | 0.77 | 0.0622 | 12.4 | 3.7E-35 | 4.8E-34 |
| ENSG00000130396 | AFDN     | afadin, adherens junction formation factor [Source:HGNC Symbol;Acc:HGNC:7137]                                      | 3323 | 0.52 | 0.0423 | 12.4 | 3.6E-35 | 4.7E-34 |
| ENSG00000111424 | VDR      | vitamin D receptor [Source:HGNC Symbol;Acc:HGNC:12679]                                                             | 1605 | 0.62 | 0.0502 | 12.4 | 3.3E-35 | 4.3E-34 |
| ENSG00000118894 | EEF2KMT  | eukaryotic elongation factor 2 lysine methyltransferase [Source:HGNC Symbol;Acc:HGNC:32221]                        | 215  | 1.67 | 0.1351 | 12.4 | 2.8E-35 | 3.6E-34 |
| ENSG00000159217 | IGF2BP1  | insulin like growth factor 2 mRNA binding protein 1 [Source:HGNC Symbol;Acc:HGNC:28866]                            | 546  | 1.04 | 0.0838 | 12.4 | 2.7E-35 | 3.5E-34 |
| ENSG00000150630 | VEGFC    | vascular endothelial growth factor C [Source:HGNC Symbol;Acc:HGNC:12682]                                           | 124  | 6.61 | 0.5325 | 12.4 | 2.4E-35 | 3.2E-34 |
| ENSG00000136732 | GYPC     | glycophorin C (Gerbig blood group) [Source:HGNC Symbol;Acc:HGNC:4704]                                              | 570  | 0.99 | 0.0795 | 12.4 | 2.1E-35 | 2.7E-34 |
| ENSG00000172661 | WASHC2C  | WASH complex subunit 2C [Source:HGNC Symbol;Acc:HGNC:23414]                                                        | 517  | 1.03 | 0.0830 | 12.4 | 2.0E-35 | 2.6E-34 |
| ENSG00000129451 | KLK10    | kallikrein related peptidase 10 [Source:HGNC Symbol;Acc:HGNC:6358]                                                 | 340  | 1.29 | 0.1038 | 12.4 | 1.9E-35 | 2.5E-34 |
| ENSG00000099290 | WASHC2A  | WASH complex subunit 2A [Source:HGNC Symbol;Acc:HGNC:23416]                                                        | 640  | 1.00 | 0.0803 | 12.4 | 1.6E-35 | 2.1E-34 |
| ENSG00000145536 | ADAMTS16 | ADAM metallopeptidase with thrombospondin type 1 motif 16 [Source:HGNC Symbol;Acc:HGNC:17108]                      | 96   | 5.77 | 0.4635 | 12.4 | 1.6E-35 | 2.1E-34 |
| ENSG00000198742 | SMURF1   | SMAD specific E3 ubiquitin protein ligase 1 [Source:HGNC Symbol;Acc:HGNC:16807]                                    | 1196 | 0.71 | 0.0571 | 12.4 | 1.4E-35 | 1.9E-34 |

|                 |                 |                                                                                                     |      |      |        |      |         |         |
|-----------------|-----------------|-----------------------------------------------------------------------------------------------------|------|------|--------|------|---------|---------|
| ENSG00000117228 | GBP1            | guanylate binding protein 1 [Source:HGNC Symbol;Acc:HGNC:4182]                                      | 1873 | 0.61 | 0.0486 | 12.5 | 9.3E-36 | 1.2E-34 |
| ENSG00000126602 | TRAP1           | TNF receptor associated protein 1 [Source:HGNC Symbol;Acc:HGNC:16264]                               | 1249 | 0.76 | 0.0609 | 12.5 | 8.8E-36 | 1.2E-34 |
| ENSG00000122257 | RBBP6           | RB binding protein 6, ubiquitin ligase [Source:HGNC Symbol;Acc:HGNC:9889]                           | 1380 | 0.71 | 0.0563 | 12.5 | 4.1E-36 | 5.5E-35 |
| ENSG00000205078 | SYCE1L          | synaptonemal complex central element protein 1 like [Source:HGNC Symbol;Acc:HGNC:37236]             | 149  | 2.15 | 0.1710 | 12.6 | 3.7E-36 | 5.0E-35 |
| ENSG00000249353 | NPM1P27         | nucleophosmin 1 pseudogene 27 [Source:HGNC Symbol;Acc:HGNC:45206]                                   | 2070 | 0.66 | 0.0526 | 12.6 | 3.7E-36 | 4.9E-35 |
| ENSG00000245694 | CRNDE           | colorectal neoplasia differentially expressed [Source:HGNC Symbol;Acc:HGNC:37078]                   | 559  | 1.00 | 0.0800 | 12.6 | 3.2E-36 | 4.3E-35 |
| ENSG00000106617 | PRKAG2          | protein kinase AMP-activated non-catalytic subunit gamma 2 [Source:HGNC Symbol;Acc:HGNC:9386]       | 1129 | 0.79 | 0.0625 | 12.6 | 2.5E-36 | 3.3E-35 |
| ENSG00000161999 | JMJD8           | jumonji domain containing 8 [Source:HGNC Symbol;Acc:HGNC:14148]                                     | 133  | 2.28 | 0.1809 | 12.6 | 2.2E-36 | 2.9E-35 |
| ENSG00000184207 | PGP             | phosphoglycolate phosphatase [Source:HGNC Symbol;Acc:HGNC:8909]                                     | 781  | 0.99 | 0.0783 | 12.6 | 2.0E-36 | 2.7E-35 |
| ENSG00000167962 | ZNF598          | zinc finger protein 598, E3 ubiquitin ligase [Source:HGNC Symbol;Acc:HGNC:28079]                    | 800  | 0.90 | 0.0717 | 12.6 | 2.0E-36 | 2.7E-35 |
| ENSG00000103005 | USB1            | U6 snRNA biogenesis phosphodiesterase 1 [Source:HGNC Symbol;Acc:HGNC:25792]                         | 1692 | 0.62 | 0.0492 | 12.6 | 1.9E-36 | 2.6E-35 |
| ENSG00000028116 | VRK2            | VRK serine/threonine kinase 2 [Source:HGNC Symbol;Acc:HGNC:12719]                                   | 629  | 0.96 | 0.0764 | 12.6 | 1.7E-36 | 2.3E-35 |
| ENSG00000136738 | STAM            | signal transducing adaptor molecule [Source:HGNC Symbol;Acc:HGNC:11357]                             | 609  | 1.00 | 0.0792 | 12.6 | 1.5E-36 | 2.0E-35 |
| ENSG00000124570 | SERPINB6        | serpin family B member 6 [Source:HGNC Symbol;Acc:HGNC:8950]                                         | 2100 | 0.64 | 0.0505 | 12.6 | 1.5E-36 | 2.0E-35 |
| ENSG00000174705 | SH3PXD2B        | SH3 and PX domains 2B [Source:HGNC Symbol;Acc:HGNC:29242]                                           | 546  | 1.06 | 0.0841 | 12.6 | 1.2E-36 | 1.6E-35 |
| ENSG00000075142 | SRI             | sorcin [Source:HGNC Symbol;Acc:HGNC:11292]                                                          | 1287 | 0.72 | 0.0568 | 12.7 | 1.1E-36 | 1.5E-35 |
| ENSG00000109854 | HTATIP2         | HIV-1 Tat interactive protein 2 [Source:HGNC Symbol;Acc:HGNC:16637]                                 | 766  | 0.97 | 0.0763 | 12.7 | 1.0E-36 | 1.4E-35 |
| ENSG00000067082 | KLF6            | Kruppel like factor 6 [Source:HGNC Symbol;Acc:HGNC:2235]                                            | 1763 | 0.62 | 0.0493 | 12.7 | 9.5E-37 | 1.3E-35 |
| ENSG00000177548 | RABEP2          | rabaptin, RAB GTPase binding effector protein 2 [Source:HGNC Symbol;Acc:HGNC:24817]                 | 952  | 0.83 | 0.0652 | 12.7 | 7.4E-37 | 1.0E-35 |
| ENSG00000113558 | SKP1            | S-phase kinase associated protein 1 [Source:HGNC Symbol;Acc:HGNC:10899]                             | 2840 | 0.51 | 0.0406 | 12.7 | 6.1E-37 | 8.2E-36 |
| ENSG00000171703 | TCEA2           | transcription elongation factor A2 [Source:HGNC Symbol;Acc:HGNC:11614]                              | 864  | 0.95 | 0.0751 | 12.7 | 5.1E-37 | 6.9E-36 |
| ENSG00000105447 | GRWD1           | glutamate rich WD repeat containing 1 [Source:HGNC Symbol;Acc:HGNC:21270]                           | 3053 | 0.52 | 0.0407 | 12.7 | 3.2E-37 | 4.3E-36 |
| ENSG00000136816 | TOR1B           | torsin family 1 member B [Source:HGNC Symbol;Acc:HGNC:11995]                                        | 1573 | 0.65 | 0.0508 | 12.8 | 2.1E-37 | 2.9E-36 |
| ENSG00000102977 | ACD             | ACD shelterin complex subunit and telomerase recruitment factor [Source:HGNC Symbol;Acc:HGNC:25000] | 1086 | 0.74 | 0.0583 | 12.8 | 2.0E-37 | 2.8E-36 |
| ENSG00000170989 | S1PR1           | sphingosine-1-phosphate receptor 1 [Source:HGNC Symbol;Acc:HGNC:3165]                               | 307  | 1.41 | 0.1097 | 12.8 | 1.2E-37 | 1.6E-36 |
| ENSG00000221963 | APOL6           | apolipoprotein L6 [Source:HGNC Symbol;Acc:HGNC:14870]                                               | 1874 | 0.63 | 0.0487 | 12.8 | 1.1E-37 | 1.4E-36 |
| ENSG00000197142 | ACSL5           | acyl-CoA synthetase long chain family member 5 [Source:HGNC Symbol;Acc:HGNC:16526]                  | 99   | 3.03 | 0.2357 | 12.8 | 8.9E-38 | 1.2E-36 |
| ENSG00000122870 | BICC1           | BicC family RNA binding protein 1 [Source:HGNC Symbol;Acc:HGNC:19351]                               | 271  | 3.04 | 0.2363 | 12.9 | 8.6E-38 | 1.2E-36 |
| ENSG00000106853 | PTGR1           | prostaglandin reductase 1 [Source:HGNC Symbol;Acc:HGNC:18429]                                       | 1162 | 0.76 | 0.0588 | 12.9 | 7.5E-38 | 1.0E-36 |
| ENSG00000158321 | AUTS2           | activator of transcription and developmental regulator AUTS2 [Source:HGNC Symbol;Acc:HGNC:14262]    | 179  | 2.02 | 0.1569 | 12.9 | 7.2E-38 | 1.0E-36 |
| ENSG00000287839 | ENSG00000287839 | novel transcript                                                                                    | 224  | 1.69 | 0.1307 | 12.9 | 4.3E-38 | 5.9E-37 |
| ENSG00000167555 | ZNF528          | zinc finger protein 528 [Source:HGNC Symbol;Acc:HGNC:29384]                                         | 293  | 1.48 | 0.1141 | 12.9 | 3.3E-38 | 4.5E-37 |
| ENSG00000133321 | PLAAT4          | phospholipase A and acyltransferase 4 [Source:HGNC Symbol;Acc:HGNC:9869]                            | 328  | 1.40 | 0.1085 | 12.9 | 2.9E-38 | 4.0E-37 |
| ENSG00000079691 | CARMIL1         | capping protein regulator and myosin 1 linker 1 [Source:HGNC Symbol;Acc:HGNC:21581]                 | 2240 | 0.56 | 0.0434 | 12.9 | 2.6E-38 | 3.7E-37 |
| ENSG00000102858 | MGRN1           | mahogunin ring finger 1 [Source:HGNC Symbol;Acc:HGNC:20254]                                         | 825  | 0.95 | 0.0736 | 12.9 | 2.6E-38 | 3.6E-37 |
| ENSG00000118900 | UBN1            | ubinuclin 1 [Source:HGNC Symbol;Acc:HGNC:12506]                                                     | 2522 | 0.59 | 0.0452 | 12.9 | 2.5E-38 | 3.5E-37 |
| ENSG00000178913 | TAF7            | TATA-box binding protein associated factor 7 [Source:HGNC Symbol;Acc:HGNC:11541]                    | 2509 | 0.57 | 0.0440 | 13.0 | 2.3E-38 | 3.2E-37 |
| ENSG00000120913 | PDLIM2          | PDZ and LIM domain 2 [Source:HGNC Symbol;Acc:HGNC:13992]                                            | 530  | 1.07 | 0.0825 | 13.0 | 2.2E-38 | 3.1E-37 |
| ENSG00000168394 | TAP1            | transporter 1, ATP binding cassette subfamily B member [Source:HGNC Symbol;Acc:HGNC:43]             | 1703 | 0.65 | 0.0501 | 13.0 | 2.2E-38 | 3.1E-37 |
| ENSG00000169814 | BTD             | biotinidase [Source:HGNC Symbol;Acc:HGNC:1122]                                                      | 544  | 1.17 | 0.0898 | 13.0 | 1.7E-38 | 2.3E-37 |
| ENSG00000171606 | ZNF274          | zinc finger protein 274 [Source:HGNC Symbol;Acc:HGNC:13068]                                         | 1042 | 0.79 | 0.0606 | 13.0 | 1.6E-38 | 2.3E-37 |
| ENSG00000127947 | PTPN12          | protein tyrosine phosphatase non-receptor type 12 [Source:HGNC Symbol;Acc:HGNC:9645]                | 2683 | 0.57 | 0.0437 | 13.0 | 1.1E-38 | 1.5E-37 |

|                 |           |                                                                                             |      |      |        |      |         |         |
|-----------------|-----------|---------------------------------------------------------------------------------------------|------|------|--------|------|---------|---------|
| ENSG00000121274 | TENT4B    | terminal nucleotidyltransferase 4B [Source:HGNC Symbol;Acc:HGNC:30758]                      | 1136 | 0.81 | 0.0626 | 13.0 | 9.5E-39 | 1.3E-37 |
| ENSG00000064961 | HMG20B    | high mobility group 20B [Source:HGNC Symbol;Acc:HGNC:5002]                                  | 1681 | 0.65 | 0.0499 | 13.0 | 9.0E-39 | 1.3E-37 |
| ENSG00000064042 | LIMCH1    | LIM and calponin homology domains 1 [Source:HGNC Symbol;Acc:HGNC:29191]                     | 1132 | 0.78 | 0.0598 | 13.0 | 8.6E-39 | 1.2E-37 |
| ENSG00000165887 | ANKRD2    | ankyrin repeat domain 2 [Source:HGNC Symbol;Acc:HGNC:495]                                   | 402  | 1.34 | 0.1030 | 13.0 | 8.1E-39 | 1.1E-37 |
| ENSG00000185847 | LINC01405 | long intergenic non-protein coding RNA 1405 [Source:HGNC Symbol;Acc:HGNC:50688]             | 147  | 6.85 | 0.5258 | 13.0 | 7.9E-39 | 1.1E-37 |
| ENSG00000062822 | POLD1     | DNA polymerase delta 1, catalytic subunit [Source:HGNC Symbol;Acc:HGNC:9175]                | 2663 | 0.53 | 0.0408 | 13.1 | 5.4E-39 | 7.6E-38 |
| ENSG00000088682 | COQ9      | coenzyme Q9 [Source:HGNC Symbol;Acc:HGNC:25302]                                             | 1528 | 0.67 | 0.0509 | 13.1 | 5.2E-39 | 7.4E-38 |
| ENSG00000102007 | PLP2      | proteolipid protein 2 [Source:HGNC Symbol;Acc:HGNC:9087]                                    | 2664 | 0.53 | 0.0403 | 13.1 | 5.0E-39 | 7.1E-38 |
| ENSG00000114480 | GBE1      | 1,4-alpha-glucan branching enzyme 1 [Source:HGNC Symbol;Acc:HGNC:4180]                      | 1235 | 0.73 | 0.0558 | 13.1 | 4.8E-39 | 6.8E-38 |
| ENSG00000059122 | FLYWCH1   | FLYWCH-type zinc finger 1 [Source:HGNC Symbol;Acc:HGNC:25404]                               | 540  | 1.07 | 0.0818 | 13.1 | 4.8E-39 | 6.8E-38 |
| ENSG00000160326 | SLC2A6    | solute carrier family 2 member 6 [Source:HGNC Symbol;Acc:HGNC:11011]                        | 207  | 1.91 | 0.1465 | 13.1 | 4.8E-39 | 6.8E-38 |
| ENSG00000138134 | STAMBPL1  | STAM binding protein like 1 [Source:HGNC Symbol;Acc:HGNC:24105]                             | 251  | 1.63 | 0.1243 | 13.1 | 4.5E-39 | 6.3E-38 |
| ENSG00000007545 | CRAMP1    | cramped chromatin regulator homolog 1 [Source:HGNC Symbol;Acc:HGNC:14122]                   | 318  | 1.45 | 0.1109 | 13.1 | 3.8E-39 | 5.4E-38 |
| ENSG00000183780 | SLC35F3   | solute carrier family 35 member F3 [Source:HGNC Symbol;Acc:HGNC:23616]                      | 97   | 3.46 | 0.2642 | 13.1 | 3.1E-39 | 4.4E-38 |
| ENSG00000186187 | ZNRF1     | zinc and ring finger 1 [Source:HGNC Symbol;Acc:HGNC:18452]                                  | 698  | 0.99 | 0.0757 | 13.1 | 3.0E-39 | 4.3E-38 |
| ENSG00000118508 | RAB32     | RAB32, member RAS oncogene family [Source:HGNC Symbol;Acc:HGNC:9772]                        | 1150 | 0.87 | 0.0659 | 13.1 | 2.3E-39 | 3.3E-38 |
| ENSG00000134470 | IL15RA    | interleukin 15 receptor subunit alpha [Source:HGNC Symbol;Acc:HGNC:5978]                    | 128  | 2.53 | 0.1926 | 13.1 | 2.2E-39 | 3.2E-38 |
| ENSG00000102924 | CBLN1     | cerebellin 1 precursor [Source:HGNC Symbol;Acc:HGNC:1543]                                   | 243  | 1.74 | 0.1322 | 13.2 | 1.2E-39 | 1.7E-38 |
| ENSG00000204520 | MICA      | MHC class I polypeptide-related sequence A [Source:HGNC Symbol;Acc:HGNC:7090]               | 665  | 1.00 | 0.0758 | 13.2 | 1.2E-39 | 1.7E-38 |
| ENSG00000103485 | QPRT      | quinolinate phosphoribosyltransferase [Source:HGNC Symbol;Acc:HGNC:9755]                    | 2175 | 0.65 | 0.0490 | 13.2 | 1.1E-39 | 1.6E-38 |
| ENSG00000007541 | PIGQ      | phosphatidylinositol glycan anchor biosynthesis class Q [Source:HGNC Symbol;Acc:HGNC:14135] | 677  | 1.02 | 0.0771 | 13.2 | 8.1E-40 | 1.2E-38 |
| ENSG00000158985 | CDC42SE2  | CDC42 small effector 2 [Source:HGNC Symbol;Acc:HGNC:18547]                                  | 1452 | 0.70 | 0.0527 | 13.2 | 7.9E-40 | 1.1E-38 |
| ENSG00000067365 | METTL22   | methyltransferase like 22 [Source:HGNC Symbol;Acc:HGNC:28368]                               | 521  | 1.13 | 0.0851 | 13.2 | 6.6E-40 | 9.6E-39 |
| ENSG00000147044 | CASK      | calcium/calmodulin dependent serine protein kinase [Source:HGNC Symbol;Acc:HGNC:1497]       | 676  | 0.99 | 0.0747 | 13.2 | 4.6E-40 | 6.7E-39 |
| ENSG00000283378 | CNTNAP3C  | contactin associated protein family member 3C [Source:HGNC Symbol;Acc:HGNC:53878]           | 88   | 3.87 | 0.2914 | 13.3 | 3.2E-40 | 4.6E-39 |
| ENSG00000057019 | DCBLD2    | discoidin, CUB and LCCL domain containing 2 [Source:HGNC Symbol;Acc:HGNC:24627]             | 848  | 0.92 | 0.0690 | 13.3 | 2.7E-40 | 3.9E-39 |
| ENSG00000073417 | PDE8A     | phosphodiesterase 8A [Source:HGNC Symbol;Acc:HGNC:8793]                                     | 792  | 0.92 | 0.0693 | 13.3 | 2.6E-40 | 3.8E-39 |
| ENSG00000108179 | PPIF      | peptidylprolyl isomerase F [Source:HGNC Symbol;Acc:HGNC:9259]                               | 1635 | 0.67 | 0.0502 | 13.3 | 1.5E-40 | 2.1E-39 |
| ENSG00000262576 | PCDHGA4   | protocadherin gamma subfamily A, 4 [Source:HGNC Symbol;Acc:HGNC:8702]                       | 97   | 5.14 | 0.3849 | 13.3 | 1.3E-40 | 1.9E-39 |
| ENSG00000255346 | NOX5      | NADPH oxidase 5 [Source:HGNC Symbol;Acc:HGNC:14874]                                         | 120  | 2.67 | 0.1999 | 13.4 | 1.1E-40 | 1.6E-39 |
| ENSG00000123416 | TUBA1B    | tubulin alpha 1b [Source:HGNC Symbol;Acc:HGNC:18809]                                        | 3033 | 0.53 | 0.0399 | 13.4 | 1.0E-40 | 1.5E-39 |
| ENSG00000175727 | MLXIP     | MLX interacting protein [Source:HGNC Symbol;Acc:HGNC:17055]                                 | 676  | 1.03 | 0.0766 | 13.4 | 5.5E-41 | 8.2E-40 |
| ENSG00000084636 | COL16A1   | collagen type XVI alpha 1 chain [Source:HGNC Symbol;Acc:HGNC:2193]                          | 500  | 1.15 | 0.0857 | 13.4 | 4.9E-41 | 7.2E-40 |
| ENSG00000173207 | CKS1B     | CDC28 protein kinase regulatory subunit 1B [Source:HGNC Symbol;Acc:HGNC:19083]              | 3691 | 0.52 | 0.0389 | 13.4 | 4.7E-41 | 7.0E-40 |
| ENSG00000134453 | RBM17     | RNA binding motif protein 17 [Source:HGNC Symbol;Acc:HGNC:16944]                            | 1617 | 0.72 | 0.0538 | 13.4 | 4.7E-41 | 6.9E-40 |
| ENSG00000168283 | BMI1      | BMI1 proto-oncogene, polycomb ring finger [Source:HGNC Symbol;Acc:HGNC:1066]                | 472  | 1.22 | 0.0910 | 13.4 | 4.6E-41 | 6.8E-40 |
| ENSG00000108582 | CPD       | carboxypeptidase D [Source:HGNC Symbol;Acc:HGNC:2301]                                       | 2025 | 0.63 | 0.0465 | 13.5 | 2.7E-41 | 4.1E-40 |
| ENSG00000197603 | CPLANE1   | ciliogenesis and planar polarity effector 1 [Source:HGNC Symbol;Acc:HGNC:25801]             | 1124 | 0.79 | 0.0583 | 13.5 | 2.3E-41 | 3.5E-40 |
| ENSG00000074071 | MRPS34    | mitochondrial ribosomal protein S34 [Source:HGNC Symbol;Acc:HGNC:16618]                     | 2041 | 1.37 | 0.1015 | 13.5 | 2.2E-41 | 3.3E-40 |
| ENSG00000091622 | PITPNM3   | PITPNM family member 3 [Source:HGNC Symbol;Acc:HGNC:21043]                                  | 1436 | 0.71 | 0.0528 | 13.5 | 2.0E-41 | 3.0E-40 |
| ENSG00000124216 | SNAI1     | snail family transcriptional repressor 1 [Source:HGNC Symbol;Acc:HGNC:11128]                | 415  | 1.27 | 0.0939 | 13.5 | 1.4E-41 | 2.1E-40 |
| ENSG00000133401 | PDZD2     | PDZ domain containing 2 [Source:HGNC Symbol;Acc:HGNC:18486]                                 | 576  | 1.12 | 0.0828 | 13.5 | 1.3E-41 | 2.0E-40 |

|                 |                 |                                                                                                                                            |       |      |        |      |         |         |
|-----------------|-----------------|--------------------------------------------------------------------------------------------------------------------------------------------|-------|------|--------|------|---------|---------|
| ENSG00000147100 | SLC16A2         | solute carrier family 16 member 2 [Source:HGNC Symbol;Acc:HGNC:10923]                                                                      | 634   | 1.21 | 0.0892 | 13.5 | 9.9E-42 | 1.5E-40 |
| ENSG00000197903 | H2BC12          | H2B clustered histone 12 [Source:HGNC Symbol;Acc:HGNC:13954]                                                                               | 1059  | 0.83 | 0.0612 | 13.6 | 5.7E-42 | 8.7E-41 |
| ENSG00000175505 | CLCF1           | cardiotrophin like cytokine factor 1 [Source:HGNC Symbol;Acc:HGNC:17412]                                                                   | 366   | 1.37 | 0.1012 | 13.6 | 5.3E-42 | 8.0E-41 |
| ENSG00000119042 | SATB2           | SATB homeobox 2 [Source:HGNC Symbol;Acc:HGNC:21637]                                                                                        | 133   | 2.56 | 0.1886 | 13.6 | 4.8E-42 | 7.3E-41 |
| ENSG00000176087 | SLC35A4         | solute carrier family 35 member A4 [Source:HGNC Symbol;Acc:HGNC:20753]                                                                     | 3429  | 0.51 | 0.0376 | 13.6 | 3.4E-42 | 5.2E-41 |
| ENSG00000164902 | PHAX            | phosphorylated adaptor for RNA export [Source:HGNC Symbol;Acc:HGNC:10241]                                                                  | 1661  | 0.66 | 0.0482 | 13.6 | 3.1E-42 | 4.8E-41 |
| ENSG00000087258 | GNAO1           | G protein subunit alpha o1 [Source:HGNC Symbol;Acc:HGNC:4389]                                                                              | 593   | 1.10 | 0.0808 | 13.6 | 2.6E-42 | 4.0E-41 |
| ENSG00000160963 | COL26A1         | collagen type XXVI alpha 1 chain [Source:HGNC Symbol;Acc:HGNC:18038]                                                                       | 156   | 2.29 | 0.1679 | 13.6 | 2.4E-42 | 3.7E-41 |
| ENSG00000008710 | PKD1            | polycystin 1, transient receptor potential channel interacting [Source:HGNC Symbol;Acc:HGNC:9008]                                          | 838   | 0.93 | 0.0681 | 13.6 | 2.3E-42 | 3.5E-41 |
| ENSG00000100003 | SEC14L2         | SEC14 like lipid binding 2 [Source:HGNC Symbol;Acc:HGNC:10699]                                                                             | 407   | 1.41 | 0.1030 | 13.6 | 2.2E-42 | 3.4E-41 |
| ENSG00000176438 | SYNE3           | spectrin repeat containing nuclear envelope family member 3 [Source:HGNC Symbol;Acc:HGNC:19861]                                            | 298   | 1.61 | 0.1180 | 13.7 | 1.4E-42 | 2.2E-41 |
| ENSG00000122515 | ZMIZ2           | zinc finger MIZ-type containing 2 [Source:HGNC Symbol;Acc:HGNC:22229]                                                                      | 2339  | 0.59 | 0.0430 | 13.7 | 1.2E-42 | 1.8E-41 |
| ENSG00000164626 | KCNK5           | potassium two pore domain channel subfamily K member 5 [Source:HGNC Symbol;Acc:HGNC:6280]                                                  | 510   | 1.19 | 0.0867 | 13.7 | 1.2E-42 | 1.8E-41 |
| ENSG00000183421 | RIPK4           | receptor interacting serine/threonine kinase 4 [Source:HGNC Symbol;Acc:HGNC:496]                                                           | 1379  | 0.73 | 0.0535 | 13.7 | 9.7E-43 | 1.5E-41 |
| ENSG00000162086 | ZNF75A          | zinc finger protein 75a [Source:HGNC Symbol;Acc:HGNC:13146]                                                                                | 441   | 1.28 | 0.0937 | 13.7 | 8.2E-43 | 1.3E-41 |
| ENSG00000146063 | TRIM41          | tripartite motif containing 41 [Source:HGNC Symbol;Acc:HGNC:19013]                                                                         | 1743  | 0.65 | 0.0474 | 13.7 | 7.0E-43 | 1.1E-41 |
| ENSG00000109519 | GRPEL1          | GrpE like 1, mitochondrial [Source:HGNC Symbol;Acc:HGNC:19696]                                                                             | 1832  | 0.64 | 0.0468 | 13.7 | 6.8E-43 | 1.1E-41 |
| ENSG00000158286 | RNF207          | ring finger protein 207 [Source:HGNC Symbol;Acc:HGNC:32947]                                                                                | 554   | 1.12 | 0.0813 | 13.7 | 6.8E-43 | 1.1E-41 |
| ENSG00000180801 | ARSL            | arylsulfatase family member J [Source:HGNC Symbol;Acc:HGNC:26286]                                                                          | 105   | 3.26 | 0.2364 | 13.8 | 3.1E-43 | 4.8E-42 |
| ENSG00000037241 | RPL26L1         | ribosomal protein L26 like 1 [Source:HGNC Symbol;Acc:HGNC:17050]                                                                           | 1244  | 0.78 | 0.0569 | 13.8 | 3.0E-43 | 4.6E-42 |
| ENSG00000128050 | PAICS           | phosphoribosylaminoimidazole carboxylase and phosphoribosylaminoimidazolesuccinocarboxamide synthetase [Source:HGNC Symbol;Acc:HGNC:10000] | 4841  | 0.50 | 0.0365 | 13.8 | 1.5E-43 | 2.4E-42 |
| ENSG00000268119 | ENSG00000268119 | novel transcript                                                                                                                           | 237   | 1.77 | 0.1281 | 13.8 | 1.3E-43 | 2.1E-42 |
| ENSG0000013561  | RNF14           | ring finger protein 14 [Source:HGNC Symbol;Acc:HGNC:10058]                                                                                 | 1548  | 0.74 | 0.0531 | 13.9 | 1.1E-43 | 1.7E-42 |
| ENSG00000135253 | KCP             | kielin cysteine rich BMP regulator [Source:HGNC Symbol;Acc:HGNC:17585]                                                                     | 110   | 3.19 | 0.2304 | 13.9 | 1.0E-43 | 1.6E-42 |
| ENSG00000140988 | RPS2            | ribosomal protein S2 [Source:HGNC Symbol;Acc:HGNC:10404]                                                                                   | 49420 | 1.49 | 0.1077 | 13.9 | 1.0E-43 | 1.6E-42 |
| ENSG00000117472 | TSPAN1          | tetraspanin 1 [Source:HGNC Symbol;Acc:HGNC:20657]                                                                                          | 441   | 1.45 | 0.1041 | 13.9 | 7.3E-44 | 1.2E-42 |
| ENSG00000171649 | ZIK1            | zinc finger protein interacting with K protein 1 [Source:HGNC Symbol;Acc:HGNC:33104]                                                       | 282   | 1.70 | 0.1225 | 13.9 | 6.7E-44 | 1.1E-42 |
| ENSG00000159202 | UBE2Z           | ubiquitin conjugating enzyme E2 Z [Source:HGNC Symbol;Acc:HGNC:25847]                                                                      | 4100  | 0.50 | 0.0360 | 13.9 | 6.6E-44 | 1.0E-42 |
| ENSG00000137124 | ALDH1B1         | aldehyde dehydrogenase 1 family member B1 [Source:HGNC Symbol;Acc:HGNC:407]                                                                | 740   | 1.01 | 0.0725 | 13.9 | 4.8E-44 | 7.7E-43 |
| ENSG00000122591 | FAM126A         | family with sequence similarity 126 member A [Source:HGNC Symbol;Acc:HGNC:24587]                                                           | 1809  | 0.68 | 0.0485 | 13.9 | 4.5E-44 | 7.2E-43 |
| ENSG00000097021 | ACOT7           | acyl-CoA thioesterase 7 [Source:HGNC Symbol;Acc:HGNC:24157]                                                                                | 1676  | 0.68 | 0.0485 | 13.9 | 3.7E-44 | 5.9E-43 |
| ENSG00000134369 | NAV1            | neuron navigator 1 [Source:HGNC Symbol;Acc:HGNC:15989]                                                                                     | 339   | 1.70 | 0.1223 | 13.9 | 3.7E-44 | 5.9E-43 |
| ENSG00000090975 | PITPNM2         | phosphatidylinositol transfer protein membrane associated 2 [Source:HGNC Symbol;Acc:HGNC:21044]                                            | 859   | 0.99 | 0.0707 | 14.0 | 2.7E-44 | 4.4E-43 |
| ENSG00000167291 | TBC1D16         | TBC1 domain family member 16 [Source:HGNC Symbol;Acc:HGNC:28356]                                                                           | 284   | 1.61 | 0.1154 | 14.0 | 2.7E-44 | 4.3E-43 |
| ENSG00000177697 | CD151           | CD151 molecule (Raph blood group) [Source:HGNC Symbol;Acc:HGNC:1630]                                                                       | 3907  | 0.54 | 0.0389 | 14.0 | 2.2E-44 | 3.6E-43 |
| ENSG00000100605 | ITPK1           | inositol-tetrakisphosphate 1-kinase [Source:HGNC Symbol;Acc:HGNC:6177]                                                                     | 1075  | 0.95 | 0.0678 | 14.0 | 2.0E-44 | 3.2E-43 |
| ENSG00000145908 | ZNF300          | zinc finger protein 300 [Source:HGNC Symbol;Acc:HGNC:13091]                                                                                | 99    | 3.85 | 0.2747 | 14.0 | 1.1E-44 | 1.9E-43 |
| ENSG00000145912 | NHP2            | NHP2 ribonucleoprotein [Source:HGNC Symbol;Acc:HGNC:14377]                                                                                 | 2207  | 0.65 | 0.0463 | 14.0 | 9.6E-45 | 1.6E-43 |
| ENSG00000103145 | HCFC1R1         | host cell factor C1 regulator 1 [Source:HGNC Symbol;Acc:HGNC:21198]                                                                        | 527   | 1.19 | 0.0847 | 14.0 | 8.2E-45 | 1.3E-43 |
| ENSG00000112118 | MCM3            | minichromosome maintenance complex component 3 [Source:HGNC Symbol;Acc:HGNC:6945]                                                          | 3518  | 0.50 | 0.0359 | 14.1 | 5.8E-45 | 9.5E-44 |
| ENSG00000120594 | PLXDC2          | plexin domain containing 2 [Source:HGNC Symbol;Acc:HGNC:21013]                                                                             | 810   | 0.97 | 0.0693 | 14.1 | 5.7E-45 | 9.4E-44 |
| ENSG00000153922 | CHD1            | chromodomain helicase DNA binding protein 1 [Source:HGNC Symbol;Acc:HGNC:1915]                                                             | 1317  | 0.80 | 0.0565 | 14.1 | 5.3E-45 | 8.7E-44 |

|                 |          |                                                                                                    |       |      |        |      |         |         |
|-----------------|----------|----------------------------------------------------------------------------------------------------|-------|------|--------|------|---------|---------|
| ENSG00000185033 | SEMA4B   | semaphorin 4B [Source:HGNC Symbol;Acc:HGNC:10730]                                                  | 1049  | 0.92 | 0.0654 | 14.1 | 4.1E-45 | 6.8E-44 |
| ENSG00000026652 | AGPAT4   | 1-acylglycerol-3-phosphate O-acyltransferase 4 [Source:HGNC Symbol;Acc:HGNC:20885]                 | 121   | 3.09 | 0.2193 | 14.1 | 3.4E-45 | 5.6E-44 |
| ENSG00000170312 | CDK1     | cyclin dependent kinase 1 [Source:HGNC Symbol;Acc:HGNC:1722]                                       | 1893  | 0.67 | 0.0477 | 14.1 | 3.3E-45 | 5.4E-44 |
| ENSG00000095906 | NUBP2    | nucleotide binding protein 2 [Source:HGNC Symbol;Acc:HGNC:8042]                                    | 1527  | 0.79 | 0.0558 | 14.1 | 2.9E-45 | 4.7E-44 |
| ENSG00000198873 | GRK5     | G protein-coupled receptor kinase 5 [Source:HGNC Symbol;Acc:HGNC:4544]                             | 454   | 1.29 | 0.0914 | 14.1 | 2.1E-45 | 3.5E-44 |
| ENSG00000196502 | SULT1A1  | sulfotransferase family 1A member 1 [Source:HGNC Symbol;Acc:HGNC:11453]                            | 132   | 2.77 | 0.1959 | 14.2 | 1.8E-45 | 3.0E-44 |
| ENSG00000187372 | PCDHB13  | protocadherin beta 13 [Source:HGNC Symbol;Acc:HGNC:8684]                                           | 231   | 1.88 | 0.1324 | 14.2 | 9.4E-46 | 1.6E-44 |
| ENSG00000164535 | DAGLB    | diacylglycerol lipase beta [Source:HGNC Symbol;Acc:HGNC:28923]                                     | 1323  | 0.84 | 0.0588 | 14.2 | 7.7E-46 | 1.3E-44 |
| ENSG00000073921 | PICALM   | phosphatidylinositol binding clathrin assembly protein [Source:HGNC Symbol;Acc:HGNC:15514]         | 3088  | 0.55 | 0.0389 | 14.2 | 7.6E-46 | 1.3E-44 |
| ENSG00000178188 | SH2B1    | SH2B adaptor protein 1 [Source:HGNC Symbol;Acc:HGNC:30417]                                         | 1088  | 0.83 | 0.0584 | 14.2 | 5.7E-46 | 9.4E-45 |
| ENSG00000106080 | FKBP14   | FKBP prolyl isomerase 14 [Source:HGNC Symbol;Acc:HGNC:18625]                                       | 440   | 1.32 | 0.0926 | 14.3 | 4.2E-46 | 6.9E-45 |
| ENSG00000260565 | ERVK13-1 | endogenous retrovirus group K13 member 1 [Source:HGNC Symbol;Acc:HGNC:27548]                       | 368   | 1.46 | 0.1021 | 14.3 | 4.1E-46 | 6.9E-45 |
| ENSG00000205629 | LCMT1    | leucine carboxyl methyltransferase 1 [Source:HGNC Symbol;Acc:HGNC:17557]                           | 699   | 1.04 | 0.0729 | 14.3 | 3.8E-46 | 6.4E-45 |
| ENSG00000176658 | MYO1D    | myosin ID [Source:HGNC Symbol;Acc:HGNC:7598]                                                       | 670   | 1.04 | 0.0732 | 14.3 | 3.1E-46 | 5.2E-45 |
| ENSG00000197943 | PLCG2    | phospholipase C gamma 2 [Source:HGNC Symbol;Acc:HGNC:9066]                                         | 343   | 1.54 | 0.1076 | 14.3 | 3.1E-46 | 5.1E-45 |
| ENSG00000136280 | CCM2     | CCM2 scaffold protein [Source:HGNC Symbol;Acc:HGNC:21708]                                          | 1368  | 0.79 | 0.0552 | 14.3 | 2.4E-46 | 4.0E-45 |
| ENSG00000103966 | EHD4     | EH domain containing 4 [Source:HGNC Symbol;Acc:HGNC:3245]                                          | 2007  | 0.74 | 0.0521 | 14.3 | 2.2E-46 | 3.7E-45 |
| ENSG00000157827 | FMNL2    | formin like 2 [Source:HGNC Symbol;Acc:HGNC:18267]                                                  | 1238  | 0.81 | 0.0567 | 14.3 | 2.0E-46 | 3.3E-45 |
| ENSG00000144596 | GRIP2    | glutamate receptor interacting protein 2 [Source:HGNC Symbol;Acc:HGNC:23841]                       | 102   | 3.98 | 0.2779 | 14.3 | 1.8E-46 | 3.0E-45 |
| ENSG00000132530 | XAF1     | XIAP associated factor 1 [Source:HGNC Symbol;Acc:HGNC:30932]                                       | 566   | 1.21 | 0.0844 | 14.3 | 1.7E-46 | 2.9E-45 |
| ENSG00000007384 | RHBDF1   | rhomboid 5 homolog 1 [Source:HGNC Symbol;Acc:HGNC:20561]                                           | 2635  | 0.58 | 0.0404 | 14.3 | 1.2E-46 | 2.0E-45 |
| ENSG00000138316 | ADAMTS14 | ADAM metalloproteinase with thrombospondin type 1 motif 14 [Source:HGNC Symbol;Acc:HGNC:14899]     | 157   | 2.50 | 0.1740 | 14.3 | 1.1E-46 | 1.8E-45 |
| ENSG00000118680 | MYL12B   | myosin light chain 12B [Source:HGNC Symbol;Acc:HGNC:29827]                                         | 9428  | 0.52 | 0.0361 | 14.4 | 9.1E-47 | 1.5E-45 |
| ENSG00000156587 | UBE2L6   | ubiquitin conjugating enzyme E2 L6 [Source:HGNC Symbol;Acc:HGNC:12490]                             | 3102  | 0.62 | 0.0428 | 14.4 | 7.9E-47 | 1.3E-45 |
| ENSG00000197928 | ZNF677   | zinc finger protein 677 [Source:HGNC Symbol;Acc:HGNC:28730]                                        | 603   | 1.15 | 0.0795 | 14.4 | 4.2E-47 | 7.2E-46 |
| ENSG00000166250 | CLMP     | CXADR like membrane protein [Source:HGNC Symbol;Acc:HGNC:24039]                                    | 147   | 2.58 | 0.1792 | 14.4 | 3.9E-47 | 6.7E-46 |
| ENSG00000167395 | ZNF646   | zinc finger protein 646 [Source:HGNC Symbol;Acc:HGNC:29004]                                        | 643   | 1.15 | 0.0798 | 14.4 | 3.6E-47 | 6.2E-46 |
| ENSG00000105926 | MPP6     | membrane palmitoylated protein 6 [Source:HGNC Symbol;Acc:HGNC:18167]                               | 489   | 1.50 | 0.1040 | 14.4 | 3.4E-47 | 5.8E-46 |
| ENSG00000111145 | ELK3     | ETS transcription factor ELK3 [Source:HGNC Symbol;Acc:HGNC:3325]                                   | 556   | 1.18 | 0.0820 | 14.4 | 3.3E-47 | 5.7E-46 |
| ENSG00000167676 | PLIN4    | perilipin 4 [Source:HGNC Symbol;Acc:HGNC:29393]                                                    | 115   | 5.24 | 0.3627 | 14.4 | 3.2E-47 | 5.4E-46 |
| ENSG00000119946 | CNNM1    | cyclin and CBS domain divalent metal cation transport mediator 1 [Source:HGNC Symbol;Acc:HGNC:102] | 885   | 0.95 | 0.0657 | 14.4 | 2.8E-47 | 4.9E-46 |
| ENSG00000131408 | NR1H2    | nuclear receptor subfamily 1 group H member 2 [Source:HGNC Symbol;Acc:HGNC:7965]                   | 3101  | 0.56 | 0.0386 | 14.5 | 2.5E-47 | 4.3E-46 |
| ENSG00000086475 | SEPHS1   | selenophosphate synthetase 1 [Source:HGNC Symbol;Acc:HGNC:19685]                                   | 2056  | 0.65 | 0.0446 | 14.5 | 2.3E-47 | 4.0E-46 |
| ENSG00000180185 | FAHD1    | fumarylacetoacetate hydrolase domain containing 1 [Source:HGNC Symbol;Acc:HGNC:14169]              | 622   | 1.12 | 0.0775 | 14.5 | 1.8E-47 | 3.2E-46 |
| ENSG00000173442 | EHBP1L1  | EH domain binding protein 1 like 1 [Source:HGNC Symbol;Acc:HGNC:30682]                             | 1979  | 0.74 | 0.0510 | 14.5 | 9.5E-48 | 1.6E-46 |
| ENSG00000197894 | ADH5     | alcohol dehydrogenase 5 (class III), chi polypeptide [Source:HGNC Symbol;Acc:HGNC:253]             | 2964  | 0.63 | 0.0433 | 14.6 | 4.9E-48 | 8.5E-47 |
| ENSG00000145632 | PLK2     | polo like kinase 2 [Source:HGNC Symbol;Acc:HGNC:19699]                                             | 4491  | 0.52 | 0.0357 | 14.6 | 4.2E-48 | 7.3E-47 |
| ENSG00000160190 | SLC37A1  | solute carrier family 37 member 1 [Source:HGNC Symbol;Acc:HGNC:11024]                              | 1070  | 0.91 | 0.0626 | 14.6 | 3.9E-48 | 6.8E-47 |
| ENSG00000159461 | AMFR     | autocrine motility factor receptor [Source:HGNC Symbol;Acc:HGNC:463]                               | 1865  | 0.71 | 0.0488 | 14.6 | 3.3E-48 | 5.7E-47 |
| ENSG00000131165 | CHMP1A   | charged multivesicular body protein 1A [Source:HGNC Symbol;Acc:HGNC:8740]                          | 1830  | 0.68 | 0.0467 | 14.6 | 3.1E-48 | 5.5E-47 |
| ENSG00000177508 | IRX3     | iroquois homeobox 3 [Source:HGNC Symbol;Acc:HGNC:14360]                                            | 789   | 1.11 | 0.0762 | 14.6 | 1.9E-48 | 3.3E-47 |
| ENSG00000167526 | RPL13    | ribosomal protein L13 [Source:HGNC Symbol;Acc:HGNC:10303]                                          | 14127 | 0.54 | 0.0368 | 14.6 | 1.4E-48 | 2.5E-47 |



|                 |            |                                                                                                       |      |      |        |      |         |         |
|-----------------|------------|-------------------------------------------------------------------------------------------------------|------|------|--------|------|---------|---------|
| ENSG00000103356 | EARS2      | glutamyl-tRNA synthetase 2, mitochondrial [Source:HGNC Symbol;Acc:HGNC:29419]                         | 1438 | 0.82 | 0.0557 | 14.7 | 1.1E-48 | 1.9E-47 |
| ENSG00000163659 | TIPARP     | TCDD inducible poly(ADP-ribose) polymerase [Source:HGNC Symbol;Acc:HGNC:23696]                        | 1350 | 0.83 | 0.0564 | 14.7 | 7.0E-49 | 1.2E-47 |
| ENSG00000136840 | ST6GALNAC  | ST6 N-acetylgalactosaminide alpha-2,6-sialyltransferase 4 [Source:HGNC Symbol;Acc:HGNC:17846]         | 534  | 1.30 | 0.0882 | 14.7 | 6.5E-49 | 1.1E-47 |
| ENSG00000168140 | VASN       | vasorin [Source:HGNC Symbol;Acc:HGNC:18517]                                                           | 373  | 1.60 | 0.1083 | 14.7 | 4.3E-49 | 7.6E-48 |
| ENSG00000079332 | SAR1A      | secretion associated Ras related GTPase 1A [Source:HGNC Symbol;Acc:HGNC:10534]                        | 3878 | 0.52 | 0.0350 | 14.8 | 2.5E-49 | 4.5E-48 |
| ENSG00000083799 | CYLD       | CYLD lysine 63 deubiquitinase [Source:HGNC Symbol;Acc:HGNC:2584]                                      | 1314 | 0.81 | 0.0548 | 14.8 | 2.0E-49 | 3.6E-48 |
| ENSG00000140632 | GLYR1      | glyoxylate reductase 1 homolog [Source:HGNC Symbol;Acc:HGNC:24434]                                    | 1789 | 0.72 | 0.0485 | 14.8 | 1.9E-49 | 3.3E-48 |
| ENSG00000138166 | DUSP5      | dual specificity phosphatase 5 [Source:HGNC Symbol;Acc:HGNC:3071]                                     | 621  | 1.20 | 0.0812 | 14.8 | 1.5E-49 | 2.6E-48 |
| ENSG00000073060 | SCARB1     | scavenger receptor class B member 1 [Source:HGNC Symbol;Acc:HGNC:1664]                                | 953  | 1.09 | 0.0734 | 14.8 | 8.6E-50 | 1.5E-48 |
| ENSG00000117226 | GBP3       | guanylate binding protein 3 [Source:HGNC Symbol;Acc:HGNC:4184]                                        | 628  | 1.18 | 0.0797 | 14.8 | 8.5E-50 | 1.5E-48 |
| ENSG00000115363 | EVA1A      | eva-1 homolog A, regulator of programmed cell death [Source:HGNC Symbol;Acc:HGNC:25816]               | 2390 | 0.67 | 0.0454 | 14.8 | 8.2E-50 | 1.4E-48 |
| ENSG00000135643 | KCNMB4     | potassium calcium-activated channel subfamily M regulatory beta subunit 4 [Source:HGNC Symbol;Acc:    | 231  | 1.96 | 0.1320 | 14.8 | 8.0E-50 | 1.4E-48 |
| ENSG00000102978 | POLR2C     | RNA polymerase II subunit C [Source:HGNC Symbol;Acc:HGNC:9189]                                        | 2353 | 0.66 | 0.0445 | 14.9 | 6.8E-50 | 1.2E-48 |
| ENSG00000265354 | TIMM23     | translocase of inner mitochondrial membrane 23 [Source:HGNC Symbol;Acc:HGNC:17312]                    | 1370 | 0.79 | 0.0533 | 14.9 | 6.4E-50 | 1.1E-48 |
| ENSG00000188191 | PRKAR1B    | protein kinase cAMP-dependent type I regulatory subunit beta [Source:HGNC Symbol;Acc:HGNC:9390]       | 1271 | 0.83 | 0.0557 | 14.9 | 5.2E-50 | 9.3E-49 |
| ENSG00000180263 | FGD6       | FYVE, RhoGEF and PH domain containing 6 [Source:HGNC Symbol;Acc:HGNC:21740]                           | 867  | 0.99 | 0.0669 | 14.9 | 5.0E-50 | 8.8E-49 |
| ENSG00000166106 | ADAMTS15   | ADAM metallopeptidase with thrombospondin type 1 motif 15 [Source:HGNC Symbol;Acc:HGNC:16305]         | 188  | 2.26 | 0.1515 | 14.9 | 3.7E-50 | 6.6E-49 |
| ENSG00000103194 | USP10      | ubiquitin specific peptidase 10 [Source:HGNC Symbol;Acc:HGNC:12608]                                   | 1599 | 0.77 | 0.0518 | 14.9 | 3.1E-50 | 5.6E-49 |
| ENSG00000182831 | C16orf72   | chromosome 16 open reading frame 72 [Source:HGNC Symbol;Acc:HGNC:30103]                               | 785  | 1.09 | 0.0733 | 14.9 | 2.7E-50 | 4.8E-49 |
| ENSG00000248538 | ENSG000002 | novel transcript                                                                                      | 110  | 4.08 | 0.2739 | 14.9 | 2.7E-50 | 4.8E-49 |
| ENSG00000122642 | FKBP9      | FKBP prolyl isomerase 9 [Source:HGNC Symbol;Acc:HGNC:3725]                                            | 2388 | 0.66 | 0.0444 | 14.9 | 2.3E-50 | 4.1E-49 |
| ENSG00000211450 | SELENOH    | selenoprotein H [Source:HGNC Symbol;Acc:HGNC:18251]                                                   | 630  | 1.26 | 0.0844 | 14.9 | 2.0E-50 | 3.6E-49 |
| ENSG00000169908 | TM4SF1     | transmembrane 4 L six family member 1 [Source:HGNC Symbol;Acc:HGNC:11853]                             | 3381 | 0.58 | 0.0390 | 14.9 | 1.8E-50 | 3.3E-49 |
| ENSG00000127463 | EMC1       | ER membrane protein complex subunit 1 [Source:HGNC Symbol;Acc:HGNC:28957]                             | 3628 | 0.55 | 0.0370 | 14.9 | 1.7E-50 | 3.0E-49 |
| ENSG00000171604 | CXXC5      | CXXC finger protein 5 [Source:HGNC Symbol;Acc:HGNC:26943]                                             | 3544 | 0.55 | 0.0365 | 15.0 | 1.5E-50 | 2.6E-49 |
| ENSG00000172159 | FRMD3      | FERM domain containing 3 [Source:HGNC Symbol;Acc:HGNC:24125]                                          | 119  | 3.44 | 0.2300 | 15.0 | 1.4E-50 | 2.6E-49 |
| ENSG00000140941 | MAP1LC3B   | microtubule associated protein 1 light chain 3 beta [Source:HGNC Symbol;Acc:HGNC:13352]               | 1259 | 0.84 | 0.0561 | 15.0 | 1.2E-50 | 2.3E-49 |
| ENSG00000275700 | AATF       | apoptosis antagonizing transcription factor [Source:HGNC Symbol;Acc:HGNC:19235]                       | 1642 | 0.75 | 0.0504 | 15.0 | 1.1E-50 | 1.9E-49 |
| ENSG00000163069 | SGCB       | sarcoglycan beta [Source:HGNC Symbol;Acc:HGNC:10806]                                                  | 1093 | 0.91 | 0.0608 | 15.0 | 7.7E-51 | 1.4E-49 |
| ENSG00000102038 | SMARCA1    | SWI/SNF related, matrix associated, actin dependent regulator of chromatin, subfamily a, member 1 [Sc | 2525 | 0.61 | 0.0409 | 15.0 | 7.7E-51 | 1.4E-49 |
| ENSG00000197081 | IGF2R      | insulin like growth factor 2 receptor [Source:HGNC Symbol;Acc:HGNC:5467]                              | 4034 | 0.55 | 0.0365 | 15.0 | 6.7E-51 | 1.2E-49 |
| ENSG00000185043 | CIB1       | calcium and integrin binding 1 [Source:HGNC Symbol;Acc:HGNC:16920]                                    | 478  | 1.34 | 0.0893 | 15.0 | 6.3E-51 | 1.1E-49 |
| ENSG00000067715 | SYT1       | synaptotagmin 1 [Source:HGNC Symbol;Acc:HGNC:11509]                                                   | 587  | 1.19 | 0.0792 | 15.0 | 5.7E-51 | 1.0E-49 |
| ENSG00000197006 | METTL9     | methyltransferase like 9 [Source:HGNC Symbol;Acc:HGNC:24586]                                          | 1912 | 0.76 | 0.0506 | 15.0 | 5.6E-51 | 1.0E-49 |
| ENSG00000129255 | MPDU1      | mannose-P-dolichol utilization defect 1 [Source:HGNC Symbol;Acc:HGNC:7207]                            | 1247 | 0.85 | 0.0567 | 15.0 | 5.1E-51 | 9.2E-50 |
| ENSG00000074211 | PPP2R2C    | protein phosphatase 2 regulatory subunit Bgamma [Source:HGNC Symbol;Acc:HGNC:9306]                    | 319  | 1.68 | 0.1118 | 15.0 | 4.4E-51 | 8.0E-50 |
| ENSG00000084754 | HADHA      | hydroxyacyl-CoA dehydrogenase trifunctional multienzyme complex subunit alpha [Source:HGNC Symb       | 4973 | 0.51 | 0.0341 | 15.1 | 3.0E-51 | 5.6E-50 |
| ENSG00000198964 | SGMS1      | sphingomyelin synthase 1 [Source:HGNC Symbol;Acc:HGNC:29799]                                          | 530  | 1.30 | 0.0864 | 15.1 | 2.3E-51 | 4.3E-50 |
| ENSG00000196850 | PPTC7      | protein phosphatase targeting COQ7 [Source:HGNC Symbol;Acc:HGNC:30695]                                | 1125 | 0.93 | 0.0615 | 15.1 | 2.2E-51 | 4.0E-50 |
| ENSG00000074416 | MGLL       | monoglyceride lipase [Source:HGNC Symbol;Acc:HGNC:17038]                                              | 3819 | 0.53 | 0.0351 | 15.1 | 1.4E-51 | 2.6E-50 |
| ENSG00000181104 | F2R        | coagulation factor II thrombin receptor [Source:HGNC Symbol;Acc:HGNC:3537]                            | 163  | 2.58 | 0.1703 | 15.2 | 5.7E-52 | 1.1E-50 |
| ENSG00000070814 | TCOF1      | treacle ribosome biogenesis factor 1 [Source:HGNC Symbol;Acc:HGNC:11654]                              | 3357 | 0.62 | 0.0410 | 15.2 | 5.7E-52 | 1.1E-50 |

|                 |           |                                                                                                  |       |      |        |      |         |         |
|-----------------|-----------|--------------------------------------------------------------------------------------------------|-------|------|--------|------|---------|---------|
| ENSG00000113068 | PFDN1     | prefoldin subunit 1 [Source:HGNC Symbol;Acc:HGNC:8866]                                           | 1249  | 0.85 | 0.0562 | 15.2 | 4.3E-52 | 8.1E-51 |
| ENSG00000197451 | HNRNPAB   | heterogeneous nuclear ribonucleoprotein A/B [Source:HGNC Symbol;Acc:HGNC:5034]                   | 7109  | 0.62 | 0.0410 | 15.2 | 4.3E-52 | 8.0E-51 |
| ENSG00000179241 | LDLRAD3   | low density lipoprotein receptor class A domain containing 3 [Source:HGNC Symbol;Acc:HGNC:27046] | 416   | 1.46 | 0.0961 | 15.2 | 3.8E-52 | 7.0E-51 |
| ENSG00000237187 | NR2F1-AS1 | NR2F1 antisense RNA 1 [Source:HGNC Symbol;Acc:HGNC:48622]                                        | 117   | 4.06 | 0.2662 | 15.2 | 1.7E-52 | 3.1E-51 |
| ENSG00000148143 | ZNF462    | zinc finger protein 462 [Source:HGNC Symbol;Acc:HGNC:21684]                                      | 728   | 1.11 | 0.0726 | 15.3 | 1.3E-52 | 2.4E-51 |
| ENSG00000127586 | CHTF18    | chromosome transmission fidelity factor 18 [Source:HGNC Symbol;Acc:HGNC:18435]                   | 1212  | 0.96 | 0.0629 | 15.3 | 6.8E-53 | 1.3E-51 |
| ENSG00000172366 | MCRIP2    | MAPK regulated corepressor interacting protein 2 [Source:HGNC Symbol;Acc:HGNC:14142]             | 204   | 2.29 | 0.1492 | 15.3 | 5.2E-53 | 9.7E-52 |
| ENSG00000129636 | ITFG1     | integrin alpha FG-GAP repeat containing 1 [Source:HGNC Symbol;Acc:HGNC:30697]                    | 2329  | 0.66 | 0.0430 | 15.4 | 2.8E-53 | 5.3E-52 |
| ENSG00000154229 | PRKCA     | protein kinase C alpha [Source:HGNC Symbol;Acc:HGNC:9393]                                        | 558   | 1.27 | 0.0829 | 15.4 | 2.6E-53 | 4.9E-52 |
| ENSG00000171316 | CHD7      | chromodomain helicase DNA binding protein 7 [Source:HGNC Symbol;Acc:HGNC:20626]                  | 829   | 1.06 | 0.0693 | 15.4 | 2.4E-53 | 4.6E-52 |
| ENSG00000158125 | XDH       | xanthine dehydrogenase [Source:HGNC Symbol;Acc:HGNC:12805]                                       | 612   | 1.22 | 0.0796 | 15.4 | 1.9E-53 | 3.6E-52 |
| ENSG00000136052 | SLC41A2   | solute carrier family 41 member 2 [Source:HGNC Symbol;Acc:HGNC:31045]                            | 425   | 1.47 | 0.0956 | 15.4 | 1.8E-53 | 3.4E-52 |
| ENSG00000157483 | MYO1E     | myosin IE [Source:HGNC Symbol;Acc:HGNC:7599]                                                     | 4649  | 0.51 | 0.0332 | 15.4 | 1.5E-53 | 2.8E-52 |
| ENSG00000167981 | ZNF597    | zinc finger protein 597 [Source:HGNC Symbol;Acc:HGNC:26573]                                      | 130   | 3.45 | 0.2235 | 15.5 | 7.5E-54 | 1.4E-52 |
| ENSG00000117461 | PIK3R3    | phosphoinositide-3-kinase regulatory subunit 3 [Source:HGNC Symbol;Acc:HGNC:8981]                | 535   | 1.33 | 0.0859 | 15.5 | 6.2E-54 | 1.2E-52 |
| ENSG00000074527 | NTN4      | netrin 4 [Source:HGNC Symbol;Acc:HGNC:13658]                                                     | 3649  | 0.59 | 0.0380 | 15.5 | 5.8E-54 | 1.1E-52 |
| ENSG00000137309 | HMGA1     | high mobility group AT-hook 1 [Source:HGNC Symbol;Acc:HGNC:5010]                                 | 7405  | 0.53 | 0.0340 | 15.5 | 3.7E-54 | 7.2E-53 |
| ENSG00000072364 | AFF4      | AF4/FMR2 family member 4 [Source:HGNC Symbol;Acc:HGNC:17869]                                     | 2811  | 0.64 | 0.0410 | 15.5 | 3.6E-54 | 6.9E-53 |
| ENSG00000108021 | TASOR2    | transcription activation suppressor family member 2 [Source:HGNC Symbol;Acc:HGNC:23484]          | 1476  | 0.87 | 0.0563 | 15.5 | 2.6E-54 | 5.1E-53 |
| ENSG00000128512 | DOCK4     | dedicator of cytokinesis 4 [Source:HGNC Symbol;Acc:HGNC:19192]                                   | 223   | 2.19 | 0.1407 | 15.5 | 2.1E-54 | 4.1E-53 |
| ENSG00000159720 | ATP6VOD1  | ATPase H+ transporting V0 subunit d1 [Source:HGNC Symbol;Acc:HGNC:13724]                         | 4148  | 0.58 | 0.0374 | 15.5 | 2.0E-54 | 3.9E-53 |
| ENSG00000188505 | NCCRP1    | NCCRP1, F-box associated domain containing [Source:HGNC Symbol;Acc:HGNC:33739]                   | 131   | 3.36 | 0.2160 | 15.6 | 1.2E-54 | 2.4E-53 |
| ENSG00000140545 | MFGE8     | milk fat globule EGF and factor V/VIII domain containing [Source:HGNC Symbol;Acc:HGNC:7036]      | 1257  | 0.90 | 0.0579 | 15.6 | 1.0E-54 | 2.0E-53 |
| ENSG00000125775 | SDCBP2    | syndecan binding protein 2 [Source:HGNC Symbol;Acc:HGNC:15756]                                   | 126   | 3.55 | 0.2278 | 15.6 | 8.9E-55 | 1.7E-53 |
| ENSG00000103260 | METRNL    | meteorin, glial cell differentiation regulator [Source:HGNC Symbol;Acc:HGNC:14151]               | 500   | 1.40 | 0.0897 | 15.6 | 4.1E-55 | 8.1E-54 |
| ENSG00000165156 | ZHX1      | zinc fingers and homeoboxes 1 [Source:HGNC Symbol;Acc:HGNC:12871]                                | 1440  | 0.86 | 0.0552 | 15.6 | 4.0E-55 | 7.9E-54 |
| ENSG00000130720 | FIBCD1    | fibrinogen C domain containing 1 [Source:HGNC Symbol;Acc:HGNC:25922]                             | 129   | 3.96 | 0.2534 | 15.6 | 3.7E-55 | 7.3E-54 |
| ENSG00000167034 | NKX3-1    | NK3 homeobox 1 [Source:HGNC Symbol;Acc:HGNC:7838]                                                | 314   | 1.82 | 0.1161 | 15.6 | 3.5E-55 | 6.9E-54 |
| ENSG00000128335 | APOL2     | apolipoprotein L2 [Source:HGNC Symbol;Acc:HGNC:619]                                              | 1619  | 0.93 | 0.0593 | 15.7 | 2.1E-55 | 4.1E-54 |
| ENSG00000137575 | SDCBP     | syndecan binding protein [Source:HGNC Symbol;Acc:HGNC:10662]                                     | 1681  | 0.78 | 0.0500 | 15.7 | 1.6E-55 | 3.2E-54 |
| ENSG00000101246 | ARFRP1    | ADP ribosylation factor related protein 1 [Source:HGNC Symbol;Acc:HGNC:662]                      | 1633  | 0.84 | 0.0532 | 15.7 | 7.2E-56 | 1.4E-54 |
| ENSG00000122643 | NT5C3A    | 5'-nucleotidase, cytosolic IIIA [Source:HGNC Symbol;Acc:HGNC:17820]                              | 843   | 1.11 | 0.0701 | 15.8 | 4.8E-56 | 9.6E-55 |
| ENSG00000132507 | EIF5A     | eukaryotic translation initiation factor 5A [Source:HGNC Symbol;Acc:HGNC:3300]                   | 20102 | 0.52 | 0.0332 | 15.8 | 4.7E-56 | 9.4E-55 |
| ENSG00000100258 | LMF2      | lipase maturation factor 2 [Source:HGNC Symbol;Acc:HGNC:25096]                                   | 1922  | 0.77 | 0.0490 | 15.8 | 3.6E-56 | 7.3E-55 |
| ENSG00000196159 | FAT4      | FAT atypical cadherin 4 [Source:HGNC Symbol;Acc:HGNC:23109]                                      | 449   | 1.45 | 0.0916 | 15.8 | 3.1E-56 | 6.2E-55 |
| ENSG00000122232 | EXTL3     | exostosin like glycosyltransferase 3 [Source:HGNC Symbol;Acc:HGNC:3518]                          | 1004  | 1.00 | 0.0632 | 15.8 | 2.7E-56 | 5.5E-55 |
| ENSG00000138798 | EGF       | epidermal growth factor [Source:HGNC Symbol;Acc:HGNC:3229]                                       | 236   | 2.10 | 0.1328 | 15.8 | 2.5E-56 | 5.0E-55 |
| ENSG00000173848 | NET1      | neuroepithelial cell transforming 1 [Source:HGNC Symbol;Acc:HGNC:14592]                          | 659   | 1.20 | 0.0761 | 15.8 | 2.2E-56 | 4.3E-55 |
| ENSG00000150867 | PIP4K2A   | phosphatidylinositol-5-phosphate 4-kinase type 2 alpha [Source:HGNC Symbol;Acc:HGNC:8997]        | 339   | 1.75 | 0.1103 | 15.8 | 1.7E-56 | 3.4E-55 |
| ENSG00000170955 | CAVIN3    | caveolae associated protein 3 [Source:HGNC Symbol;Acc:HGNC:9400]                                 | 145   | 3.16 | 0.1995 | 15.8 | 1.5E-56 | 2.9E-55 |
| ENSG00000103502 | CDIPT     | CDP-diacylglycerol-inositol 3-phosphatidyltransferase [Source:HGNC Symbol;Acc:HGNC:1769]         | 1088  | 0.97 | 0.0611 | 15.9 | 1.2E-56 | 2.5E-55 |
| ENSG00000105993 | DNAJB6    | DnaJ heat shock protein family (Hsp40) member B6 [Source:HGNC Symbol;Acc:HGNC:14888]             | 4271  | 0.54 | 0.0340 | 15.9 | 1.2E-56 | 2.4E-55 |

|                 |          |                                                                                                       |       |      |        |      |         |         |
|-----------------|----------|-------------------------------------------------------------------------------------------------------|-------|------|--------|------|---------|---------|
| ENSG00000176406 | RIMS2    | regulating synaptic membrane exocytosis 2 [Source:HGNC Symbol;Acc:HGNC:17283]                         | 868   | 1.09 | 0.0685 | 15.9 | 1.2E-56 | 2.4E-55 |
| ENSG00000162591 | MEGF6    | multiple EGF like domains 6 [Source:HGNC Symbol;Acc:HGNC:3232]                                        | 200   | 2.41 | 0.1521 | 15.9 | 1.2E-56 | 2.3E-55 |
| ENSG00000130731 | METTL26  | methyltransferase like 26 [Source:HGNC Symbol;Acc:HGNC:14141]                                         | 1149  | 0.94 | 0.0593 | 15.9 | 6.9E-57 | 1.4E-55 |
| ENSG00000151348 | EXT2     | exostosin glycosyltransferase 2 [Source:HGNC Symbol;Acc:HGNC:3513]                                    | 4243  | 0.63 | 0.0394 | 15.9 | 6.8E-57 | 1.4E-55 |
| ENSG00000196262 | PPIA     | peptidylprolyl isomerase A [Source:HGNC Symbol;Acc:HGNC:9253]                                         | 69320 | 0.92 | 0.0581 | 15.9 | 6.2E-57 | 1.3E-55 |
| ENSG00000184584 | STING1   | stimulator of interferon response cGAMP interactor 1 [Source:HGNC Symbol;Acc:HGNC:27962]              | 1035  | 0.97 | 0.0610 | 15.9 | 5.5E-57 | 1.1E-55 |
| ENSG00000171444 | MCC      | MCC regulator of WNT signaling pathway [Source:HGNC Symbol;Acc:HGNC:6935]                             | 702   | 1.19 | 0.0745 | 15.9 | 4.9E-57 | 1.0E-55 |
| ENSG00000033011 | ALG1     | ALG1 chitobiosyldiphosphodolichol beta-mannosyltransferase [Source:HGNC Symbol;Acc:HGNC:18294]        | 388   | 1.62 | 0.1016 | 15.9 | 3.7E-57 | 7.5E-56 |
| ENSG00000147010 | SH3KBP1  | SH3 domain containing kinase binding protein 1 [Source:HGNC Symbol;Acc:HGNC:13867]                    | 3798  | 0.62 | 0.0388 | 16.0 | 2.8E-57 | 5.7E-56 |
| ENSG00000167969 | ECI1     | enoyl-CoA delta isomerase 1 [Source:HGNC Symbol;Acc:HGNC:2703]                                        | 1141  | 0.98 | 0.0614 | 16.0 | 2.6E-57 | 5.3E-56 |
| ENSG00000074219 | TEAD2    | TEA domain transcription factor 2 [Source:HGNC Symbol;Acc:HGNC:11715]                                 | 258   | 2.03 | 0.1271 | 16.0 | 2.1E-57 | 4.3E-56 |
| ENSG00000104774 | MAN2B1   | mannosidase alpha class 2B member 1 [Source:HGNC Symbol;Acc:HGNC:6826]                                | 209   | 2.37 | 0.1485 | 16.0 | 1.8E-57 | 3.6E-56 |
| ENSG00000161981 | SNRNP25  | small nuclear ribonucleoprotein U11/U12 subunit 25 [Source:HGNC Symbol;Acc:HGNC:14161]                | 3843  | 0.61 | 0.0384 | 16.0 | 1.6E-57 | 3.3E-56 |
| ENSG00000131504 | DIAPH1   | diaphanous related formin 1 [Source:HGNC Symbol;Acc:HGNC:2876]                                        | 5204  | 0.53 | 0.0328 | 16.0 | 1.1E-57 | 2.3E-56 |
| ENSG00000136848 | DAB2IP   | DAB2 interacting protein [Source:HGNC Symbol;Acc:HGNC:17294]                                          | 1494  | 0.85 | 0.0528 | 16.0 | 1.0E-57 | 2.1E-56 |
| ENSG00000041880 | PARP3    | poly(ADP-ribose) polymerase family member 3 [Source:HGNC Symbol;Acc:HGNC:273]                         | 385   | 1.77 | 0.1105 | 16.0 | 1.0E-57 | 2.1E-56 |
| ENSG00000166446 | CDYL2    | chromodomain Y like 2 [Source:HGNC Symbol;Acc:HGNC:23030]                                             | 141   | 5.19 | 0.3233 | 16.0 | 6.0E-58 | 1.2E-56 |
| ENSG00000117407 | ARTN     | artemin [Source:HGNC Symbol;Acc:HGNC:727]                                                             | 166   | 2.97 | 0.1849 | 16.1 | 5.7E-58 | 1.2E-56 |
| ENSG00000005020 | SKAP2    | src kinase associated phosphoprotein 2 [Source:HGNC Symbol;Acc:HGNC:15687]                            | 1305  | 0.87 | 0.0542 | 16.1 | 3.9E-58 | 8.2E-57 |
| ENSG00000151465 | CDC123   | cell division cycle 123 [Source:HGNC Symbol;Acc:HGNC:16827]                                           | 1267  | 0.90 | 0.0556 | 16.1 | 1.5E-58 | 3.1E-57 |
| ENSG00000177189 | RPS6KA3  | ribosomal protein S6 kinase A3 [Source:HGNC Symbol;Acc:HGNC:10432]                                    | 1152  | 0.92 | 0.0571 | 16.2 | 8.2E-59 | 1.7E-57 |
| ENSG00000197774 | EME2     | essential meiotic structure-specific endonuclease subunit 2 [Source:HGNC Symbol;Acc:HGNC:27289]       | 312   | 1.81 | 0.1117 | 16.2 | 7.0E-59 | 1.5E-57 |
| ENSG00000198736 | MSRB1    | methionine sulfoxide reductase B1 [Source:HGNC Symbol;Acc:HGNC:14133]                                 | 538   | 1.37 | 0.0847 | 16.2 | 6.1E-59 | 1.3E-57 |
| ENSG00000151718 | WWC2     | WW and C2 domain containing 2 [Source:HGNC Symbol;Acc:HGNC:24148]                                     | 3890  | 0.57 | 0.0350 | 16.2 | 5.0E-59 | 1.0E-57 |
| ENSG00000160211 | G6PD     | glucose-6-phosphate dehydrogenase [Source:HGNC Symbol;Acc:HGNC:4057]                                  | 2491  | 0.69 | 0.0422 | 16.3 | 1.9E-59 | 3.9E-58 |
| ENSG00000142634 | EFHD2    | EF-hand domain family member D2 [Source:HGNC Symbol;Acc:HGNC:28670]                                   | 891   | 1.16 | 0.0712 | 16.3 | 1.6E-59 | 3.5E-58 |
| ENSG00000164574 | GALNT10  | polypeptide N-acetylgalactosaminyltransferase 10 [Source:HGNC Symbol;Acc:HGNC:19873]                  | 3514  | 0.62 | 0.0383 | 16.3 | 1.3E-59 | 2.8E-58 |
| ENSG00000120129 | DUSP1    | dual specificity phosphatase 1 [Source:HGNC Symbol;Acc:HGNC:3064]                                     | 1832  | 0.78 | 0.0478 | 16.3 | 5.4E-60 | 1.2E-58 |
| ENSG00000123146 | ADGRE5   | adhesion G protein-coupled receptor E5 [Source:HGNC Symbol;Acc:HGNC:1711]                             | 1543  | 0.87 | 0.0532 | 16.3 | 5.4E-60 | 1.1E-58 |
| ENSG00000143322 | ABL2     | ABL proto-oncogene 2, non-receptor tyrosine kinase [Source:HGNC Symbol;Acc:HGNC:77]                   | 1712  | 0.80 | 0.0489 | 16.4 | 2.3E-60 | 5.0E-59 |
| ENSG00000144136 | SLC20A1  | solute carrier family 20 member 1 [Source:HGNC Symbol;Acc:HGNC:10946]                                 | 3344  | 0.61 | 0.0373 | 16.4 | 1.1E-60 | 2.3E-59 |
| ENSG00000065809 | FAM107B  | family with sequence similarity 107 member B [Source:HGNC Symbol;Acc:HGNC:23726]                      | 222   | 2.35 | 0.1426 | 16.5 | 7.1E-61 | 1.5E-59 |
| ENSG00000115641 | FHL2     | four and a half LIM domains 2 [Source:HGNC Symbol;Acc:HGNC:3703]                                      | 2559  | 0.69 | 0.0421 | 16.5 | 7.0E-61 | 1.5E-59 |
| ENSG00000130635 | COL5A1   | collagen type V alpha 1 chain [Source:HGNC Symbol;Acc:HGNC:2209]                                      | 5334  | 0.59 | 0.0357 | 16.5 | 3.9E-61 | 8.5E-60 |
| ENSG00000235162 | C12orf75 | chromosome 12 open reading frame 75 [Source:HGNC Symbol;Acc:HGNC:35164]                               | 2814  | 0.68 | 0.0410 | 16.5 | 3.7E-61 | 8.0E-60 |
| ENSG00000114779 | ABHD14B  | abhydrolase domain containing 14B [Source:HGNC Symbol;Acc:HGNC:28235]                                 | 812   | 1.13 | 0.0684 | 16.5 | 3.4E-61 | 7.3E-60 |
| ENSG00000163399 | ATP1A1   | ATPase Na <sup>+</sup> /K <sup>+</sup> transporting subunit alpha 1 [Source:HGNC Symbol;Acc:HGNC:799] | 8349  | 0.53 | 0.0321 | 16.5 | 2.9E-61 | 6.3E-60 |
| ENSG00000103197 | TSC2     | TSC complex subunit 2 [Source:HGNC Symbol;Acc:HGNC:12363]                                             | 1333  | 0.93 | 0.0561 | 16.5 | 2.3E-61 | 5.0E-60 |
| ENSG00000090924 | PLEKHG2  | pleckstrin homology and RhoGEF domain containing G2 [Source:HGNC Symbol;Acc:HGNC:29515]               | 958   | 1.05 | 0.0635 | 16.6 | 9.6E-62 | 2.1E-60 |
| ENSG00000175274 | TP53I11  | tumor protein p53 inducible protein 11 [Source:HGNC Symbol;Acc:HGNC:16842]                            | 255   | 2.12 | 0.1279 | 16.6 | 8.8E-62 | 1.9E-60 |
| ENSG00000121297 | TSHZ3    | teashirt zinc finger homeobox 3 [Source:HGNC Symbol;Acc:HGNC:30700]                                   | 166   | 3.08 | 0.1860 | 16.6 | 8.2E-62 | 1.8E-60 |
| ENSG00000184007 | PTP4A2   | protein tyrosine phosphatase 4A2 [Source:HGNC Symbol;Acc:HGNC:9635]                                   | 3135  | 0.68 | 0.0411 | 16.7 | 2.0E-62 | 4.5E-61 |

|                 |            |                                                                                          |       |      |        |      |         |         |
|-----------------|------------|------------------------------------------------------------------------------------------|-------|------|--------|------|---------|---------|
| ENSG00000260604 | ENSG000002 | novel transcript                                                                         | 186   | 2.84 | 0.1702 | 16.7 | 1.8E-62 | 3.9E-61 |
| ENSG00000132481 | TRIM47     | tripartite motif containing 47 [Source:HGNC Symbol;Acc:HGNC:19020]                       | 752   | 1.23 | 0.0735 | 16.7 | 1.4E-62 | 3.0E-61 |
| ENSG00000103534 | TMC5       | transmembrane channel like 5 [Source:HGNC Symbol;Acc:HGNC:22999]                         | 677   | 1.35 | 0.0808 | 16.7 | 1.3E-62 | 2.8E-61 |
| ENSG00000100558 | PLEK2      | pleckstrin 2 [Source:HGNC Symbol;Acc:HGNC:19238]                                         | 516   | 1.68 | 0.1004 | 16.7 | 1.1E-62 | 2.3E-61 |
| ENSG00000108829 | LRRC59     | leucine rich repeat containing 59 [Source:HGNC Symbol;Acc:HGNC:28817]                    | 4355  | 0.57 | 0.0338 | 16.7 | 8.3E-63 | 1.8E-61 |
| ENSG00000185164 | NOMO2      | NODAL modulator 2 [Source:HGNC Symbol;Acc:HGNC:22652]                                    | 4073  | 0.60 | 0.0357 | 16.8 | 3.3E-63 | 7.3E-62 |
| ENSG00000145901 | TNIP1      | TNFAIP3 interacting protein 1 [Source:HGNC Symbol;Acc:HGNC:16903]                        | 2123  | 0.76 | 0.0453 | 16.8 | 2.8E-63 | 6.3E-62 |
| ENSG00000064205 | CCN5       | cellular communication network factor 5 [Source:HGNC Symbol;Acc:HGNC:12770]              | 221   | 2.60 | 0.1549 | 16.8 | 2.7E-63 | 5.9E-62 |
| ENSG00000174791 | RIN1       | Ras and Rab interactor 1 [Source:HGNC Symbol;Acc:HGNC:18749]                             | 278   | 2.17 | 0.1294 | 16.8 | 2.4E-63 | 5.4E-62 |
| ENSG00000162654 | GBP4       | guanylate binding protein 4 [Source:HGNC Symbol;Acc:HGNC:20480]                          | 407   | 1.72 | 0.1021 | 16.8 | 2.2E-63 | 4.9E-62 |
| ENSG00000196498 | NCOR2      | nuclear receptor corepressor 2 [Source:HGNC Symbol;Acc:HGNC:7673]                        | 3397  | 0.79 | 0.0472 | 16.8 | 1.9E-63 | 4.2E-62 |
| ENSG00000102870 | ZNF629     | zinc finger protein 629 [Source:HGNC Symbol;Acc:HGNC:29008]                              | 950   | 1.11 | 0.0662 | 16.8 | 1.8E-63 | 4.1E-62 |
| ENSG00000225138 | SLC9A3-AS1 | SLC9A3 antisense RNA 1 [Source:HGNC Symbol;Acc:HGNC:40550]                               | 435   | 1.64 | 0.0972 | 16.9 | 1.0E-63 | 2.3E-62 |
| ENSG00000103496 | STX4       | syntaxin 4 [Source:HGNC Symbol;Acc:HGNC:11439]                                           | 1142  | 0.99 | 0.0584 | 17.0 | 1.6E-64 | 3.6E-63 |
| ENSG00000023171 | GRAMD1B    | GRAM domain containing 1B [Source:HGNC Symbol;Acc:HGNC:29214]                            | 443   | 4.07 | 0.2402 | 17.0 | 1.5E-64 | 3.3E-63 |
| ENSG00000172775 | PSME3IP1   | proteasome activator subunit 3 interacting protein 1 [Source:HGNC Symbol;Acc:HGNC:29856] | 2185  | 0.77 | 0.0452 | 17.0 | 1.3E-64 | 3.0E-63 |
| ENSG00000138356 | AOX1       | aldehyde oxidase 1 [Source:HGNC Symbol;Acc:HGNC:553]                                     | 233   | 2.46 | 0.1446 | 17.0 | 9.9E-65 | 2.3E-63 |
| ENSG00000167930 | FAM234A    | family with sequence similarity 234 member A [Source:HGNC Symbol;Acc:HGNC:14163]         | 2009  | 0.77 | 0.0451 | 17.0 | 9.3E-65 | 2.1E-63 |
| ENSG00000119771 | KLHL29     | kelch like family member 29 [Source:HGNC Symbol;Acc:HGNC:29404]                          | 282   | 2.05 | 0.1206 | 17.0 | 8.0E-65 | 1.8E-63 |
| ENSG00000152465 | NMT2       | N-myristoyltransferase 2 [Source:HGNC Symbol;Acc:HGNC:7858]                              | 606   | 1.37 | 0.0806 | 17.0 | 5.5E-65 | 1.2E-63 |
| ENSG00000159579 | RSPRY1     | ring finger and SPRY domain containing 1 [Source:HGNC Symbol;Acc:HGNC:29420]             | 1095  | 1.03 | 0.0604 | 17.0 | 5.3E-65 | 1.2E-63 |
| ENSG00000164877 | MICAL2     | MICAL like 2 [Source:HGNC Symbol;Acc:HGNC:29672]                                         | 600   | 1.41 | 0.0829 | 17.0 | 4.6E-65 | 1.1E-63 |
| ENSG00000184840 | TMED9      | transmembrane p24 trafficking protein 9 [Source:HGNC Symbol;Acc:HGNC:24878]              | 11271 | 0.51 | 0.0301 | 17.0 | 4.0E-65 | 9.2E-64 |
| ENSG00000137834 | SMAD6      | SMAD family member 6 [Source:HGNC Symbol;Acc:HGNC:6772]                                  | 950   | 1.11 | 0.0650 | 17.1 | 2.5E-65 | 5.7E-64 |
| ENSG00000197712 | FAM114A1   | family with sequence similarity 114 member A1 [Source:HGNC Symbol;Acc:HGNC:25087]        | 1117  | 1.01 | 0.0592 | 17.1 | 1.7E-65 | 3.8E-64 |
| ENSG00000167766 | ZNF83      | zinc finger protein 83 [Source:HGNC Symbol;Acc:HGNC:13158]                               | 931   | 1.15 | 0.0674 | 17.1 | 1.5E-65 | 3.5E-64 |
| ENSG00000085063 | CD59       | CD59 molecule (CD59 blood group) [Source:HGNC Symbol;Acc:HGNC:1689]                      | 4649  | 0.61 | 0.0355 | 17.1 | 1.4E-65 | 3.3E-64 |
| ENSG00000169594 | BNC1       | basonuclin 1 [Source:HGNC Symbol;Acc:HGNC:1081]                                          | 152   | 4.79 | 0.2798 | 17.1 | 1.2E-65 | 2.9E-64 |
| ENSG00000138131 | LOXL4      | lysyl oxidase like 4 [Source:HGNC Symbol;Acc:HGNC:17171]                                 | 247   | 2.58 | 0.1507 | 17.1 | 1.1E-65 | 2.5E-64 |
| ENSG00000169221 | TBC1D10B   | TBC1 domain family member 10B [Source:HGNC Symbol;Acc:HGNC:24510]                        | 1071  | 1.13 | 0.0657 | 17.1 | 9.1E-66 | 2.1E-64 |
| ENSG00000140853 | NLRCS      | NLR family CARD domain containing 5 [Source:HGNC Symbol;Acc:HGNC:29933]                  | 610   | 1.40 | 0.0816 | 17.1 | 7.8E-66 | 1.8E-64 |
| ENSG00000167608 | TMC4       | transmembrane channel like 4 [Source:HGNC Symbol;Acc:HGNC:22998]                         | 312   | 1.99 | 0.1158 | 17.1 | 6.3E-66 | 1.5E-64 |
| ENSG00000132334 | PTPRE      | protein tyrosine phosphatase receptor type E [Source:HGNC Symbol;Acc:HGNC:9669]          | 531   | 1.49 | 0.0864 | 17.2 | 2.7E-66 | 6.4E-65 |
| ENSG00000168528 | SERINC2    | serine incorporator 2 [Source:HGNC Symbol;Acc:HGNC:23231]                                | 4318  | 0.65 | 0.0379 | 17.2 | 2.2E-66 | 5.2E-65 |
| ENSG00000078269 | SYNJ2      | synaptojanin 2 [Source:HGNC Symbol;Acc:HGNC:11504]                                       | 924   | 1.14 | 0.0662 | 17.2 | 1.9E-66 | 4.6E-65 |
| ENSG00000149932 | TMEM219    | transmembrane protein 219 [Source:HGNC Symbol;Acc:HGNC:25201]                            | 962   | 1.17 | 0.0677 | 17.2 | 1.9E-66 | 4.6E-65 |
| ENSG00000103326 | CAPN15     | calpain 15 [Source:HGNC Symbol;Acc:HGNC:11182]                                           | 889   | 1.11 | 0.0647 | 17.2 | 1.7E-66 | 4.0E-65 |
| ENSG00000141756 | FKBP10     | FKBP prolyl isomerase 10 [Source:HGNC Symbol;Acc:HGNC:18169]                             | 328   | 1.95 | 0.1133 | 17.2 | 1.4E-66 | 3.4E-65 |
| ENSG00000113578 | FGF1       | fibroblast growth factor 1 [Source:HGNC Symbol;Acc:HGNC:3665]                            | 156   | 3.60 | 0.2081 | 17.3 | 3.9E-67 | 9.2E-66 |
| ENSG00000255302 | EID1       | EP300 interacting inhibitor of differentiation 1 [Source:HGNC Symbol;Acc:HGNC:1191]      | 2712  | 0.71 | 0.0409 | 17.3 | 3.0E-67 | 7.2E-66 |
| ENSG00000164111 | ANXA5      | annexin A5 [Source:HGNC Symbol;Acc:HGNC:543]                                             | 10504 | 0.55 | 0.0314 | 17.4 | 6.9E-68 | 1.6E-66 |
| ENSG00000122299 | ZC3H7A     | zinc finger CCCH-type containing 7A [Source:HGNC Symbol;Acc:HGNC:30959]                  | 2198  | 0.82 | 0.0470 | 17.4 | 5.7E-68 | 1.4E-66 |

|                 |          |                                                                                                     |       |      |        |      |         |         |
|-----------------|----------|-----------------------------------------------------------------------------------------------------|-------|------|--------|------|---------|---------|
| ENSG00000155918 | RAET1L   | retinoic acid early transcript 1L [Source:HGNC Symbol;Acc:HGNC:16798]                               | 203   | 2.74 | 0.1570 | 17.4 | 5.4E-68 | 1.3E-66 |
| ENSG00000214049 | UCA1     | urothelial cancer associated 1 [Source:HGNC Symbol;Acc:HGNC:37126]                                  | 1702  | 0.88 | 0.0506 | 17.4 | 4.1E-68 | 1.0E-66 |
| ENSG00000102287 | GABRE    | gamma-aminobutyric acid type A receptor subunit epsilon [Source:HGNC Symbol;Acc:HGNC:4085]          | 168   | 3.27 | 0.1870 | 17.5 | 2.7E-68 | 6.6E-67 |
| ENSG00000179918 | SEPHS2   | selenophosphate synthetase 2 [Source:HGNC Symbol;Acc:HGNC:19686]                                    | 1299  | 0.97 | 0.0558 | 17.5 | 1.8E-68 | 4.5E-67 |
| ENSG00000141076 | UTP4     | UTP4 small subunit processome component [Source:HGNC Symbol;Acc:HGNC:1983]                          | 3709  | 0.65 | 0.0373 | 17.5 | 1.6E-68 | 3.8E-67 |
| ENSG00000007376 | RPUSD1   | RNA pseudouridine synthase domain containing 1 [Source:HGNC Symbol;Acc:HGNC:14173]                  | 1094  | 1.11 | 0.0629 | 17.6 | 4.6E-69 | 1.1E-67 |
| ENSG00000157106 | SMG1     | SMG1 nonsense mediated mRNA decay associated PI3K related kinase [Source:HGNC Symbol;Acc:HGNC:1474] | 5568  | 0.59 | 0.0337 | 17.6 | 4.3E-69 | 1.0E-67 |
| ENSG00000042493 | CAPG     | capping actin protein, gelsolin like [Source:HGNC Symbol;Acc:HGNC:1474]                             | 8167  | 0.58 | 0.0331 | 17.6 | 1.3E-69 | 3.2E-68 |
| ENSG00000110218 | PANX1    | pannexin 1 [Source:HGNC Symbol;Acc:HGNC:8599]                                                       | 924   | 1.21 | 0.0685 | 17.7 | 8.5E-70 | 2.1E-68 |
| ENSG00000155254 | MARVELD1 | MARVEL domain containing 1 [Source:HGNC Symbol;Acc:HGNC:28674]                                      | 1737  | 0.88 | 0.0499 | 17.7 | 8.2E-70 | 2.0E-68 |
| ENSG00000083444 | PLOD1    | procollagen-lysine,2-oxoglutarate 5-dioxygenase 1 [Source:HGNC Symbol;Acc:HGNC:9081]                | 4832  | 0.60 | 0.0337 | 17.7 | 5.0E-70 | 1.2E-68 |
| ENSG00000112893 | MAN2A1   | mannosidase alpha class 2A member 1 [Source:HGNC Symbol;Acc:HGNC:6824]                              | 2136  | 0.95 | 0.0539 | 17.7 | 4.8E-70 | 1.2E-68 |
| ENSG00000103044 | HAS3     | hyaluronan synthase 3 [Source:HGNC Symbol;Acc:HGNC:4820]                                            | 714   | 1.38 | 0.0776 | 17.7 | 2.2E-70 | 5.3E-69 |
| ENSG00000082781 | ITGB5    | integrin subunit beta 5 [Source:HGNC Symbol;Acc:HGNC:6160]                                          | 2983  | 0.70 | 0.0396 | 17.7 | 2.1E-70 | 5.1E-69 |
| ENSG00000007520 | TSR3     | TSR3 ribosome maturation factor [Source:HGNC Symbol;Acc:HGNC:14175]                                 | 852   | 1.40 | 0.0785 | 17.8 | 1.3E-70 | 3.2E-69 |
| ENSG00000154380 | ENAH     | ENAH actin regulator [Source:HGNC Symbol;Acc:HGNC:18271]                                            | 4721  | 0.62 | 0.0348 | 17.8 | 9.3E-71 | 2.3E-69 |
| ENSG00000127603 | MACF1    | microtubule actin crosslinking factor 1 [Source:HGNC Symbol;Acc:HGNC:13664]                         | 5946  | 0.67 | 0.0376 | 17.8 | 3.7E-71 | 9.2E-70 |
| ENSG00000102359 | SRPX2    | sushi repeat containing protein X-linked 2 [Source:HGNC Symbol;Acc:HGNC:30668]                      | 163   | 4.32 | 0.2425 | 17.8 | 3.6E-71 | 9.1E-70 |
| ENSG00000171992 | SYNPO    | synaptopodin [Source:HGNC Symbol;Acc:HGNC:30672]                                                    | 2590  | 0.84 | 0.0472 | 17.8 | 3.5E-71 | 8.8E-70 |
| ENSG00000186603 | HPDL     | 4-hydroxyphenylpyruvate dioxygenase like [Source:HGNC Symbol;Acc:HGNC:28242]                        | 188   | 5.57 | 0.3120 | 17.8 | 3.4E-71 | 8.6E-70 |
| ENSG00000086730 | LAT2     | linker for activation of T cells family member 2 [Source:HGNC Symbol;Acc:HGNC:12749]                | 203   | 2.83 | 0.1585 | 17.8 | 3.2E-71 | 8.0E-70 |
| ENSG00000005339 | CREBBP   | CREB binding protein [Source:HGNC Symbol;Acc:HGNC:2348]                                             | 1726  | 0.89 | 0.0498 | 17.9 | 2.5E-71 | 6.4E-70 |
| ENSG00000015171 | ZMYND11  | zinc finger MYND-type containing 11 [Source:HGNC Symbol;Acc:HGNC:16966]                             | 1988  | 0.82 | 0.0457 | 17.9 | 1.9E-71 | 4.7E-70 |
| ENSG00000040275 | SPDL1    | spindle apparatus coiled-coil protein 1 [Source:HGNC Symbol;Acc:HGNC:26010]                         | 1956  | 0.84 | 0.0471 | 17.9 | 1.6E-71 | 4.0E-70 |
| ENSG00000125520 | SLC2A4RG | SLC2A4 regulator [Source:HGNC Symbol;Acc:HGNC:15930]                                                | 4918  | 0.60 | 0.0336 | 17.9 | 1.4E-71 | 3.5E-70 |
| ENSG00000224078 | SNHG14   | small nucleolar RNA host gene 14 [Source:HGNC Symbol;Acc:HGNC:37462]                                | 2139  | 0.80 | 0.0444 | 17.9 | 9.4E-72 | 2.4E-70 |
| ENSG00000188549 | CCDC9B   | coiled-coil domain containing 9B [Source:HGNC Symbol;Acc:HGNC:33488]                                | 3417  | 0.67 | 0.0375 | 18.0 | 1.9E-72 | 4.9E-71 |
| ENSG00000079156 | OSBPL6   | oxysterol binding protein like 6 [Source:HGNC Symbol;Acc:HGNC:16388]                                | 343   | 2.13 | 0.1182 | 18.0 | 1.9E-72 | 4.8E-71 |
| ENSG00000113583 | C5orf15  | chromosome 5 open reading frame 15 [Source:HGNC Symbol;Acc:HGNC:20656]                              | 2628  | 0.75 | 0.0416 | 18.0 | 1.7E-72 | 4.4E-71 |
| ENSG00000065328 | MCM10    | minichromosome maintenance 10 replication initiation factor [Source:HGNC Symbol;Acc:HGNC:18043]     | 918   | 1.16 | 0.0644 | 18.0 | 1.2E-72 | 3.1E-71 |
| ENSG00000069188 | SDK2     | sidekick cell adhesion molecule 2 [Source:HGNC Symbol;Acc:HGNC:19308]                               | 244   | 2.54 | 0.1404 | 18.1 | 5.8E-73 | 1.5E-71 |
| ENSG00000179958 | DCTPP1   | dCTP pyrophosphatase 1 [Source:HGNC Symbol;Acc:HGNC:28777]                                          | 575   | 1.48 | 0.0818 | 18.1 | 4.7E-73 | 1.2E-71 |
| ENSG00000122884 | P4HA1    | prolyl 4-hydroxylase subunit alpha 1 [Source:HGNC Symbol;Acc:HGNC:8546]                             | 893   | 1.25 | 0.0690 | 18.1 | 3.2E-73 | 8.3E-72 |
| ENSG00000102804 | TSC22D1  | TSC22 domain family member 1 [Source:HGNC Symbol;Acc:HGNC:16826]                                    | 988   | 1.20 | 0.0662 | 18.1 | 3.1E-73 | 7.9E-72 |
| ENSG00000156860 | FBR5     | fibrosin [Source:HGNC Symbol;Acc:HGNC:20442]                                                        | 1788  | 0.88 | 0.0485 | 18.1 | 2.4E-73 | 6.3E-72 |
| ENSG00000121898 | CPXM2    | carboxypeptidase X, M14 family member 2 [Source:HGNC Symbol;Acc:HGNC:26977]                         | 453   | 1.73 | 0.0952 | 18.1 | 1.7E-73 | 4.3E-72 |
| ENSG00000149930 | TAOK2    | TAO kinase 2 [Source:HGNC Symbol;Acc:HGNC:16835]                                                    | 2350  | 0.86 | 0.0473 | 18.2 | 1.1E-73 | 2.8E-72 |
| ENSG00000117308 | GALE     | UDP-galactose-4-epimerase [Source:HGNC Symbol;Acc:HGNC:4116]                                        | 944   | 1.19 | 0.0656 | 18.2 | 1.1E-73 | 2.7E-72 |
| ENSG00000137767 | SQOR     | sulfide quinone oxidoreductase [Source:HGNC Symbol;Acc:HGNC:20390]                                  | 272   | 2.32 | 0.1279 | 18.2 | 9.1E-74 | 2.4E-72 |
| ENSG00000102882 | MAPK3    | mitogen-activated protein kinase 3 [Source:HGNC Symbol;Acc:HGNC:6877]                               | 1194  | 1.14 | 0.0628 | 18.2 | 5.1E-74 | 1.3E-72 |
| ENSG00000140859 | KIFC3    | kinesin family member C3 [Source:HGNC Symbol;Acc:HGNC:6326]                                         | 3589  | 0.68 | 0.0374 | 18.2 | 4.6E-74 | 1.2E-72 |
| ENSG00000102144 | PGK1     | phosphoglycerate kinase 1 [Source:HGNC Symbol;Acc:HGNC:8896]                                        | 10661 | 0.57 | 0.0313 | 18.2 | 3.2E-74 | 8.4E-73 |

|                 |          |                                                                                           |       |      |        |      |         |         |
|-----------------|----------|-------------------------------------------------------------------------------------------|-------|------|--------|------|---------|---------|
| ENSG00000187837 | H1-2     | H1.2 linker histone, cluster member [Source:HGNC Symbol;Acc:HGNC:4716]                    | 1460  | 1.02 | 0.0561 | 18.3 | 2.0E-74 | 5.3E-73 |
| ENSG00000179889 | PDXDC1   | pyridoxal dependent decarboxylase domain containing 1 [Source:HGNC Symbol;Acc:HGNC:28995] | 5639  | 0.60 | 0.0327 | 18.3 | 1.3E-74 | 3.4E-73 |
| ENSG00000169223 | LMAN2    | lectin, mannose binding 2 [Source:HGNC Symbol;Acc:HGNC:16986]                             | 5369  | 0.61 | 0.0336 | 18.3 | 6.8E-75 | 1.8E-73 |
| ENSG00000150938 | CRIM1    | cysteine rich transmembrane BMP regulator 1 [Source:HGNC Symbol;Acc:HGNC:2359]            | 7064  | 0.56 | 0.0304 | 18.4 | 2.6E-75 | 7.0E-74 |
| ENSG00000105048 | TNNT1    | troponin T1, slow skeletal type [Source:HGNC Symbol;Acc:HGNC:11948]                       | 3510  | 0.71 | 0.0386 | 18.4 | 2.2E-75 | 5.8E-74 |
| ENSG00000090530 | P3H2     | prolyl 3-hydroxylase 2 [Source:HGNC Symbol;Acc:HGNC:19317]                                | 4082  | 0.69 | 0.0378 | 18.4 | 1.8E-75 | 4.9E-74 |
| ENSG00000159399 | HK2      | hexokinase 2 [Source:HGNC Symbol;Acc:HGNC:4923]                                           | 2236  | 0.84 | 0.0454 | 18.4 | 1.2E-75 | 3.2E-74 |
| ENSG00000113758 | DBN1     | drebrin 1 [Source:HGNC Symbol;Acc:HGNC:2695]                                              | 2461  | 0.82 | 0.0447 | 18.4 | 9.6E-76 | 2.6E-74 |
| ENSG00000145782 | ATG12    | autophagy related 12 [Source:HGNC Symbol;Acc:HGNC:588]                                    | 1203  | 1.07 | 0.0581 | 18.5 | 4.8E-76 | 1.3E-74 |
| ENSG00000213949 | ITGA1    | integrin subunit alpha 1 [Source:HGNC Symbol;Acc:HGNC:6134]                               | 1124  | 1.07 | 0.0580 | 18.5 | 3.4E-76 | 9.1E-75 |
| ENSG00000133818 | RRAS2    | RAS related 2 [Source:HGNC Symbol;Acc:HGNC:17271]                                         | 837   | 1.32 | 0.0711 | 18.5 | 1.7E-76 | 4.6E-75 |
| ENSG00000184792 | OSBP2    | oxysterol binding protein 2 [Source:HGNC Symbol;Acc:HGNC:8504]                            | 580   | 1.51 | 0.0818 | 18.5 | 1.5E-76 | 4.0E-75 |
| ENSG00000159840 | ZYX      | zyxin [Source:HGNC Symbol;Acc:HGNC:13200]                                                 | 1887  | 0.93 | 0.0504 | 18.5 | 1.2E-76 | 3.2E-75 |
| ENSG00000136270 | TBRG4    | transforming growth factor beta regulator 4 [Source:HGNC Symbol;Acc:HGNC:17443]           | 3739  | 0.68 | 0.0369 | 18.6 | 6.7E-77 | 1.8E-75 |
| ENSG00000146007 | ZMAT2    | zinc finger matrin-type 2 [Source:HGNC Symbol;Acc:HGNC:26433]                             | 3801  | 0.68 | 0.0365 | 18.6 | 2.8E-77 | 7.5E-76 |
| ENSG00000122565 | CBX3     | chromobox 3 [Source:HGNC Symbol;Acc:HGNC:1553]                                            | 11050 | 0.51 | 0.0274 | 18.6 | 2.7E-77 | 7.3E-76 |
| ENSG00000171914 | TLN2     | talin 2 [Source:HGNC Symbol;Acc:HGNC:15447]                                               | 438   | 1.83 | 0.0983 | 18.6 | 2.3E-77 | 6.4E-76 |
| ENSG00000013306 | SLC25A39 | solute carrier family 25 member 39 [Source:HGNC Symbol;Acc:HGNC:24279]                    | 3925  | 0.68 | 0.0363 | 18.6 | 1.9E-77 | 5.2E-76 |
| ENSG00000196526 | AFAP1    | actin filament associated protein 1 [Source:HGNC Symbol;Acc:HGNC:24017]                   | 1761  | 0.92 | 0.0495 | 18.6 | 1.8E-77 | 4.9E-76 |
| ENSG00000198832 | SELENOM  | selenoprotein M [Source:HGNC Symbol;Acc:HGNC:30397]                                       | 1294  | 1.07 | 0.0573 | 18.6 | 1.4E-77 | 3.9E-76 |
| ENSG00000165733 | BMS1     | BMS1 ribosome biogenesis factor [Source:HGNC Symbol;Acc:HGNC:23505]                       | 1629  | 0.92 | 0.0494 | 18.6 | 1.3E-77 | 3.6E-76 |
| ENSG00000103404 | USP31    | ubiquitin specific peptidase 31 [Source:HGNC Symbol;Acc:HGNC:20060]                       | 753   | 1.43 | 0.0767 | 18.7 | 9.0E-78 | 2.5E-76 |
| ENSG00000221968 | FADS3    | fatty acid desaturase 3 [Source:HGNC Symbol;Acc:HGNC:3576]                                | 820   | 1.28 | 0.0684 | 18.7 | 5.2E-78 | 1.4E-76 |
| ENSG00000185924 | RTN4RL1  | reticulon 4 receptor like 1 [Source:HGNC Symbol;Acc:HGNC:21329]                           | 257   | 2.55 | 0.1365 | 18.7 | 4.1E-78 | 1.1E-76 |
| ENSG00000164308 | ERAP2    | endoplasmic reticulum aminopeptidase 2 [Source:HGNC Symbol;Acc:HGNC:29499]                | 816   | 1.36 | 0.0724 | 18.7 | 3.5E-78 | 9.8E-77 |
| ENSG00000109062 | SLC9A3R1 | SLC9A3 regulator 1 [Source:HGNC Symbol;Acc:HGNC:11075]                                    | 4335  | 0.68 | 0.0361 | 18.7 | 3.3E-78 | 9.1E-77 |
| ENSG00000129521 | EGLN3    | egl-9 family hypoxia inducible factor 3 [Source:HGNC Symbol;Acc:HGNC:14661]               | 641   | 1.54 | 0.0820 | 18.8 | 4.1E-79 | 1.2E-77 |
| ENSG00000100243 | CYB5R3   | cytochrome b5 reductase 3 [Source:HGNC Symbol;Acc:HGNC:2873]                              | 3689  | 0.69 | 0.0367 | 18.8 | 3.9E-79 | 1.1E-77 |
| ENSG00000165629 | ATP5F1C  | ATP synthase F1 subunit gamma [Source:HGNC Symbol;Acc:HGNC:833]                           | 2941  | 0.83 | 0.0440 | 18.8 | 3.4E-79 | 9.5E-78 |
| ENSG00000204673 | AKT1S1   | AKT1 substrate 1 [Source:HGNC Symbol;Acc:HGNC:28426]                                      | 5177  | 0.72 | 0.0383 | 18.8 | 3.4E-79 | 9.5E-78 |
| ENSG00000112175 | BMP5     | bone morphogenetic protein 5 [Source:HGNC Symbol;Acc:HGNC:1072]                           | 349   | 2.06 | 0.1092 | 18.9 | 1.2E-79 | 3.5E-78 |
| ENSG00000214711 | CAPN14   | calpain 14 [Source:HGNC Symbol;Acc:HGNC:16664]                                            | 645   | 1.48 | 0.0783 | 18.9 | 1.2E-79 | 3.4E-78 |
| ENSG00000136244 | IL6      | interleukin 6 [Source:HGNC Symbol;Acc:HGNC:6018]                                          | 679   | 1.48 | 0.0783 | 18.9 | 9.7E-80 | 2.7E-78 |
| ENSG00000196562 | SULF2    | sulfatase 2 [Source:HGNC Symbol;Acc:HGNC:20392]                                           | 428   | 1.88 | 0.0992 | 18.9 | 9.3E-80 | 2.6E-78 |
| ENSG00000059378 | PARP12   | poly(ADP-ribose) polymerase family member 12 [Source:HGNC Symbol;Acc:HGNC:21919]          | 2202  | 0.85 | 0.0447 | 18.9 | 6.4E-80 | 1.8E-78 |
| ENSG00000123240 | OPTN     | optineurin [Source:HGNC Symbol;Acc:HGNC:17142]                                            | 1274  | 1.06 | 0.0559 | 18.9 | 6.4E-80 | 1.8E-78 |
| ENSG00000102172 | SMS      | spermine synthase [Source:HGNC Symbol;Acc:HGNC:11123]                                     | 7277  | 0.60 | 0.0316 | 19.0 | 4.2E-80 | 1.2E-78 |
| ENSG00000103275 | UBE2I    | ubiquitin conjugating enzyme E2 I [Source:HGNC Symbol;Acc:HGNC:12485]                     | 1921  | 0.91 | 0.0480 | 19.0 | 2.9E-80 | 8.4E-79 |
| ENSG00000136205 | TNS3     | tensin 3 [Source:HGNC Symbol;Acc:HGNC:21616]                                              | 4329  | 0.64 | 0.0338 | 19.0 | 2.9E-80 | 8.3E-79 |
| ENSG00000008441 | NFIX     | nuclear factor I X [Source:HGNC Symbol;Acc:HGNC:7788]                                     | 865   | 1.29 | 0.0682 | 19.0 | 2.2E-80 | 6.3E-79 |
| ENSG00000131653 | TRAF7    | TNF receptor associated factor 7 [Source:HGNC Symbol;Acc:HGNC:20456]                      | 2603  | 0.79 | 0.0414 | 19.0 | 2.1E-80 | 5.9E-79 |
| ENSG00000121753 | ADGRB2   | adhesion G protein-coupled receptor B2 [Source:HGNC Symbol;Acc:HGNC:944]                  | 1384  | 1.05 | 0.0550 | 19.0 | 1.2E-80 | 3.5E-79 |

|                 |          |                                                                                                           |       |      |        |      |         |         |
|-----------------|----------|-----------------------------------------------------------------------------------------------------------|-------|------|--------|------|---------|---------|
| ENSG00000156642 | NPTN     | neuroplastin [Source:HGNC Symbol;Acc:HGNC:17867]                                                          | 5066  | 0.66 | 0.0348 | 19.0 | 8.4E-81 | 2.4E-79 |
| ENSG00000106991 | ENG      | endoglin [Source:HGNC Symbol;Acc:HGNC:3349]                                                               | 1011  | 1.19 | 0.0627 | 19.0 | 7.4E-81 | 2.2E-79 |
| ENSG00000122862 | SRGN     | serglycin [Source:HGNC Symbol;Acc:HGNC:9361]                                                              | 2250  | 2.27 | 0.1193 | 19.1 | 6.3E-81 | 1.8E-79 |
| ENSG00000147862 | NFIB     | nuclear factor I B [Source:HGNC Symbol;Acc:HGNC:7785]                                                     | 633   | 1.63 | 0.0858 | 19.1 | 5.7E-81 | 1.7E-79 |
| ENSG00000163932 | PRKCD    | protein kinase C delta [Source:HGNC Symbol;Acc:HGNC:9399]                                                 | 917   | 1.26 | 0.0660 | 19.1 | 2.2E-81 | 6.4E-80 |
| ENSG00000143367 | TUFT1    | tuftelin 1 [Source:HGNC Symbol;Acc:HGNC:12422]                                                            | 3508  | 0.79 | 0.0415 | 19.1 | 1.4E-81 | 4.1E-80 |
| ENSG00000097007 | ABL1     | ABL proto-oncogene 1, non-receptor tyrosine kinase [Source:HGNC Symbol;Acc:HGNC:76]                       | 1486  | 1.02 | 0.0532 | 19.1 | 1.3E-81 | 3.7E-80 |
| ENSG00000103423 | DNAJA3   | DnaJ heat shock protein family (Hsp40) member A3 [Source:HGNC Symbol;Acc:HGNC:11808]                      | 1279  | 1.09 | 0.0570 | 19.1 | 1.2E-81 | 3.5E-80 |
| ENSG00000108846 | ABCC3    | ATP binding cassette subfamily C member 3 [Source:HGNC Symbol;Acc:HGNC:54]                                | 765   | 1.42 | 0.0741 | 19.1 | 1.1E-81 | 3.3E-80 |
| ENSG00000080031 | PTPRH    | protein tyrosine phosphatase receptor type H [Source:HGNC Symbol;Acc:HGNC:9672]                           | 299   | 2.38 | 0.1244 | 19.2 | 6.2E-82 | 1.8E-80 |
| ENSG00000113732 | ATP6V0E1 | ATPase H+ transporting V0 subunit e1 [Source:HGNC Symbol;Acc:HGNC:863]                                    | 3410  | 0.76 | 0.0395 | 19.2 | 4.4E-82 | 1.3E-80 |
| ENSG00000148158 | SNX30    | sorting nexin family member 30 [Source:HGNC Symbol;Acc:HGNC:23685]                                        | 369   | 2.12 | 0.1102 | 19.2 | 3.1E-82 | 9.2E-81 |
| ENSG00000183751 | TBL3     | transducin beta like 3 [Source:HGNC Symbol;Acc:HGNC:11587]                                                | 1163  | 1.14 | 0.0590 | 19.3 | 5.0E-83 | 1.5E-81 |
| ENSG00000135090 | TAOK3    | TAO kinase 3 [Source:HGNC Symbol;Acc:HGNC:18133]                                                          | 1368  | 1.05 | 0.0539 | 19.4 | 4.3E-84 | 1.3E-82 |
| ENSG00000105974 | CAV1     | caveolin 1 [Source:HGNC Symbol;Acc:HGNC:1527]                                                             | 10719 | 0.54 | 0.0276 | 19.5 | 2.2E-84 | 6.8E-83 |
| ENSG00000172183 | ISG20    | interferon stimulated exonuclease gene 20 [Source:HGNC Symbol;Acc:HGNC:6130]                              | 705   | 1.57 | 0.0804 | 19.5 | 1.4E-84 | 4.4E-83 |
| ENSG00000144645 | OSBPL10  | oxysterol binding protein like 10 [Source:HGNC Symbol;Acc:HGNC:16395]                                     | 1118  | 1.24 | 0.0638 | 19.5 | 1.3E-84 | 4.0E-83 |
| ENSG00000011028 | MRC2     | mannose receptor C type 2 [Source:HGNC Symbol;Acc:HGNC:16875]                                             | 660   | 1.53 | 0.0784 | 19.5 | 1.0E-84 | 3.1E-83 |
| ENSG00000117298 | ECE1     | endothelin converting enzyme 1 [Source:HGNC Symbol;Acc:HGNC:3146]                                         | 5409  | 0.64 | 0.0330 | 19.5 | 1.0E-84 | 3.1E-83 |
| ENSG00000134278 | SPIRE1   | spire type actin nucleation factor 1 [Source:HGNC Symbol;Acc:HGNC:30622]                                  | 1139  | 1.17 | 0.0601 | 19.5 | 9.2E-85 | 2.8E-83 |
| ENSG00000142669 | SH3BGRL3 | SH3 domain binding glutamate rich protein like 3 [Source:HGNC Symbol;Acc:HGNC:15568]                      | 3374  | 0.72 | 0.0371 | 19.5 | 6.5E-85 | 2.0E-83 |
| ENSG00000156453 | PCDH1    | protocadherin 1 [Source:HGNC Symbol;Acc:HGNC:8655]                                                        | 3458  | 0.72 | 0.0368 | 19.6 | 2.3E-85 | 7.0E-84 |
| ENSG00000057608 | GDI2     | GDP dissociation inhibitor 2 [Source:HGNC Symbol;Acc:HGNC:4227]                                           | 3850  | 0.72 | 0.0365 | 19.6 | 1.1E-85 | 3.3E-84 |
| ENSG00000198618 | PPIAP22  | peptidylprolyl isomerase A pseudogene 22 [Source:HGNC Symbol;Acc:HGNC:17236]                              | 2580  | 0.92 | 0.0468 | 19.6 | 8.6E-86 | 2.7E-84 |
| ENSG00000113441 | LNPEP    | leucyl and cystinyl aminopeptidase [Source:HGNC Symbol;Acc:HGNC:6656]                                     | 1112  | 1.25 | 0.0634 | 19.7 | 5.5E-86 | 1.7E-84 |
| ENSG00000113739 | STC2     | stanniocalcin 2 [Source:HGNC Symbol;Acc:HGNC:11374]                                                       | 2556  | 0.80 | 0.0408 | 19.7 | 2.9E-86 | 9.1E-85 |
| ENSG00000185499 | MUC1     | mucin 1, cell surface associated [Source:HGNC Symbol;Acc:HGNC:7508]                                       | 286   | 2.59 | 0.1316 | 19.7 | 2.3E-86 | 7.1E-85 |
| ENSG00000184347 | SLIT3    | slit guidance ligand 3 [Source:HGNC Symbol;Acc:HGNC:11087]                                                | 196   | 4.63 | 0.2346 | 19.7 | 1.5E-86 | 4.6E-85 |
| ENSG00000103365 | GGA2     | golgi associated, gamma adaptin ear containing, ARF binding protein 2 [Source:HGNC Symbol;Acc:HGNC:11087] | 3844  | 0.77 | 0.0388 | 19.7 | 1.4E-86 | 4.3E-85 |
| ENSG00000147162 | OGT      | O-linked N-acetylglucosamine (GlcNAc) transferase [Source:HGNC Symbol;Acc:HGNC:8127]                      | 4849  | 0.71 | 0.0359 | 19.8 | 7.7E-87 | 2.4E-85 |
| ENSG00000168209 | DDIT4    | DNA damage inducible transcript 4 [Source:HGNC Symbol;Acc:HGNC:24944]                                     | 2079  | 0.92 | 0.0467 | 19.8 | 6.4E-87 | 2.0E-85 |
| ENSG00000165476 | REEP3    | receptor accessory protein 3 [Source:HGNC Symbol;Acc:HGNC:23711]                                          | 1484  | 1.08 | 0.0545 | 19.8 | 6.0E-87 | 1.9E-85 |
| ENSG00000175334 | BANF1    | BAF nuclear assembly factor 1 [Source:HGNC Symbol;Acc:HGNC:17397]                                         | 5986  | 0.63 | 0.0318 | 19.8 | 3.7E-87 | 1.2E-85 |
| ENSG00000089693 | MLF2     | myeloid leukemia factor 2 [Source:HGNC Symbol;Acc:HGNC:7126]                                              | 7514  | 0.58 | 0.0294 | 19.8 | 3.0E-87 | 9.7E-86 |
| ENSG00000006652 | IFRD1    | interferon related developmental regulator 1 [Source:HGNC Symbol;Acc:HGNC:5456]                           | 2500  | 0.88 | 0.0443 | 19.8 | 1.9E-87 | 6.1E-86 |
| ENSG00000138411 | HECW2    | HECT, C2 and WW domain containing E3 ubiquitin protein ligase 2 [Source:HGNC Symbol;Acc:HGNC:2988]        | 578   | 1.74 | 0.0876 | 19.8 | 1.1E-87 | 3.5E-86 |
| ENSG00000099139 | PCSK5    | proprotein convertase subtilisin/kexin type 5 [Source:HGNC Symbol;Acc:HGNC:8747]                          | 215   | 5.13 | 0.2577 | 19.9 | 4.1E-88 | 1.3E-86 |
| ENSG00000119986 | AVP11    | arginine vasopressin induced 1 [Source:HGNC Symbol;Acc:HGNC:30898]                                        | 843   | 1.40 | 0.0703 | 19.9 | 2.7E-88 | 8.8E-87 |
| ENSG00000060237 | WNK1     | WNK lysine deficient protein kinase 1 [Source:HGNC Symbol;Acc:HGNC:14540]                                 | 4304  | 0.70 | 0.0353 | 20.0 | 1.5E-88 | 4.8E-87 |
| ENSG00000198431 | TXNRD1   | thioredoxin reductase 1 [Source:HGNC Symbol;Acc:HGNC:12437]                                               | 13273 | 0.53 | 0.0266 | 20.0 | 8.1E-89 | 2.7E-87 |
| ENSG00000140750 | ARHGAP17 | Rho GTPase activating protein 17 [Source:HGNC Symbol;Acc:HGNC:18239]                                      | 1047  | 1.27 | 0.0635 | 20.0 | 7.3E-89 | 2.4E-87 |
| ENSG00000176171 | BNIP3    | BCL2 interacting protein 3 [Source:HGNC Symbol;Acc:HGNC:1084]                                             | 2059  | 0.92 | 0.0460 | 20.0 | 6.5E-89 | 2.1E-87 |

|                 |           |                                                                                                  |       |      |        |      |          |         |
|-----------------|-----------|--------------------------------------------------------------------------------------------------|-------|------|--------|------|----------|---------|
| ENSG00000143549 | TPM3      | tropomyosin 3 [Source:HGNC Symbol;Acc:HGNC:12012]                                                | 14776 | 0.53 | 0.0263 | 20.1 | 1.8E-89  | 6.0E-88 |
| ENSG00000167779 | IGFBP6    | insulin like growth factor binding protein 6 [Source:HGNC Symbol;Acc:HGNC:5475]                  | 359   | 2.18 | 0.1087 | 20.1 | 1.4E-89  | 4.6E-88 |
| ENSG00000214063 | TSPAN4    | tetraspanin 4 [Source:HGNC Symbol;Acc:HGNC:11859]                                                | 758   | 1.47 | 0.0731 | 20.1 | 1.3E-89  | 4.2E-88 |
| ENSG00000162337 | LRP5      | LDL receptor related protein 5 [Source:HGNC Symbol;Acc:HGNC:6697]                                | 3459  | 0.75 | 0.0372 | 20.1 | 1.1E-89  | 3.6E-88 |
| ENSG00000107959 | PITRM1    | pitrilysin metallopeptidase 1 [Source:HGNC Symbol;Acc:HGNC:17663]                                | 1312  | 1.13 | 0.0562 | 20.1 | 6.1E-90  | 2.0E-88 |
| ENSG00000168488 | ATXN2L    | ataxin 2 like [Source:HGNC Symbol;Acc:HGNC:31326]                                                | 2482  | 0.92 | 0.0460 | 20.1 | 5.1E-90  | 1.7E-88 |
| ENSG00000105559 | PLEKHA4   | pleckstrin homology domain containing A4 [Source:HGNC Symbol;Acc:HGNC:14339]                     | 338   | 2.51 | 0.1246 | 20.1 | 3.0E-90  | 1.0E-88 |
| ENSG00000162614 | NEXN      | nexilin F-actin binding protein [Source:HGNC Symbol;Acc:HGNC:29557]                              | 323   | 2.56 | 0.1268 | 20.2 | 2.6E-90  | 8.8E-89 |
| ENSG00000106397 | PLOD3     | procollagen-lysine,2-oxoglutarate 5-dioxygenase 3 [Source:HGNC Symbol;Acc:HGNC:9083]             | 4138  | 0.73 | 0.0361 | 20.3 | 2.8E-91  | 9.4E-90 |
| ENSG00000065618 | COL17A1   | collagen type XVII alpha 1 chain [Source:HGNC Symbol;Acc:HGNC:2194]                              | 7774  | 0.59 | 0.0289 | 20.3 | 9.2E-92  | 3.1E-90 |
| ENSG00000136026 | CKAP4     | cytoskeleton associated protein 4 [Source:HGNC Symbol;Acc:HGNC:16991]                            | 2995  | 0.79 | 0.0389 | 20.3 | 6.5E-92  | 2.2E-90 |
| ENSG00000136231 | IGF2BP3   | insulin like growth factor 2 mRNA binding protein 3 [Source:HGNC Symbol;Acc:HGNC:28868]          | 2332  | 0.93 | 0.0458 | 20.4 | 3.1E-92  | 1.1E-90 |
| ENSG00000119938 | PPP1R3C   | protein phosphatase 1 regulatory subunit 3C [Source:HGNC Symbol;Acc:HGNC:9293]                   | 484   | 1.91 | 0.0934 | 20.4 | 6.6E-93  | 2.3E-91 |
| ENSG00000112297 | CRYBG1    | crystallin beta-gamma domain containing 1 [Source:HGNC Symbol;Acc:HGNC:356]                      | 1166  | 1.23 | 0.0599 | 20.5 | 4.3E-93  | 1.5E-91 |
| ENSG00000123104 | ITPR2     | inositol 1,4,5-trisphosphate receptor type 2 [Source:HGNC Symbol;Acc:HGNC:6181]                  | 944   | 1.45 | 0.0707 | 20.5 | 2.6E-93  | 9.2E-92 |
| ENSG00000196839 | ADA       | adenosine deaminase [Source:HGNC Symbol;Acc:HGNC:186]                                            | 513   | 1.87 | 0.0914 | 20.5 | 1.8E-93  | 6.3E-92 |
| ENSG00000068366 | ACSL4     | acyl-CoA synthetase long chain family member 4 [Source:HGNC Symbol;Acc:HGNC:3571]                | 934   | 1.32 | 0.0645 | 20.5 | 1.6E-93  | 5.8E-92 |
| ENSG00000232677 | LINC00665 | long intergenic non-protein coding RNA 665 [Source:HGNC Symbol;Acc:HGNC:44323]                   | 736   | 1.57 | 0.0764 | 20.5 | 1.3E-93  | 4.6E-92 |
| ENSG00000185201 | IFITM2    | interferon induced transmembrane protein 2 [Source:HGNC Symbol;Acc:HGNC:5413]                    | 642   | 1.86 | 0.0904 | 20.5 | 9.6E-94  | 3.4E-92 |
| ENSG00000103266 | STUB1     | STIP1 homology and U-box containing protein 1 [Source:HGNC Symbol;Acc:HGNC:11427]                | 791   | 1.52 | 0.0739 | 20.6 | 3.8E-94  | 1.3E-92 |
| ENSG00000128487 | SPECC1    | sperm antigen with calponin homology and coiled-coil domains 1 [Source:HGNC Symbol;Acc:HGNC:306] | 1860  | 1.04 | 0.0504 | 20.6 | 1.5E-94  | 5.3E-93 |
| ENSG00000136271 | DDX56     | DEAD-box helicase 56 [Source:HGNC Symbol;Acc:HGNC:18193]                                         | 4454  | 0.74 | 0.0359 | 20.6 | 1.0E-94  | 3.6E-93 |
| ENSG00000115267 | IFIH1     | interferon induced with helicase C domain 1 [Source:HGNC Symbol;Acc:HGNC:18873]                  | 2351  | 0.96 | 0.0464 | 20.6 | 1.0E-94  | 3.6E-93 |
| ENSG00000057252 | SOAT1     | sterol O-acyltransferase 1 [Source:HGNC Symbol;Acc:HGNC:11177]                                   | 1374  | 1.12 | 0.0541 | 20.7 | 7.6E-95  | 2.7E-93 |
| ENSG00000242779 | ZNF702P   | zinc finger protein 702, pseudogene [Source:HGNC Symbol;Acc:HGNC:25775]                          | 366   | 2.45 | 0.1184 | 20.7 | 4.3E-95  | 1.5E-93 |
| ENSG00000106714 | CNTNAP3   | contactin associated protein family member 3 [Source:HGNC Symbol;Acc:HGNC:13834]                 | 229   | 4.80 | 0.2311 | 20.8 | 9.3E-96  | 3.3E-94 |
| ENSG00000124102 | PI3       | peptidase inhibitor 3 [Source:HGNC Symbol;Acc:HGNC:8947]                                         | 905   | 1.62 | 0.0780 | 20.8 | 7.0E-96  | 2.5E-94 |
| ENSG00000205413 | SAMD9     | sterile alpha motif domain containing 9 [Source:HGNC Symbol;Acc:HGNC:1348]                       | 4293  | 0.84 | 0.0405 | 20.8 | 2.9E-96  | 1.1E-94 |
| ENSG00000115457 | IGFBP2    | insulin like growth factor binding protein 2 [Source:HGNC Symbol;Acc:HGNC:5471]                  | 1971  | 2.21 | 0.1060 | 20.8 | 1.5E-96  | 5.6E-95 |
| ENSG00000128284 | APOL3     | apolipoprotein L3 [Source:HGNC Symbol;Acc:HGNC:14868]                                            | 263   | 3.02 | 0.1447 | 20.8 | 1.5E-96  | 5.6E-95 |
| ENSG00000033867 | SLC4A7    | solute carrier family 4 member 7 [Source:HGNC Symbol;Acc:HGNC:11033]                             | 681   | 1.72 | 0.0823 | 20.9 | 1.5E-96  | 5.5E-95 |
| ENSG00000077235 | GTF3C1    | general transcription factor IIIC subunit 1 [Source:HGNC Symbol;Acc:HGNC:4664]                   | 2984  | 0.89 | 0.0423 | 20.9 | 2.1E-97  | 7.8E-96 |
| ENSG00000077782 | FGFR1     | fibroblast growth factor receptor 1 [Source:HGNC Symbol;Acc:HGNC:3688]                           | 696   | 1.67 | 0.0799 | 21.0 | 1.4E-97  | 5.3E-96 |
| ENSG00000165996 | HACD1     | 3-hydroxyacyl-CoA dehydratase 1 [Source:HGNC Symbol;Acc:HGNC:9639]                               | 723   | 1.80 | 0.0857 | 21.0 | 1.4E-97  | 5.2E-96 |
| ENSG00000019144 | PHLDB1    | pleckstrin homology like domain family B member 1 [Source:HGNC Symbol;Acc:HGNC:23697]            | 1346  | 1.16 | 0.0554 | 21.0 | 1.1E-97  | 4.2E-96 |
| ENSG00000058085 | LAMC2     | laminin subunit gamma 2 [Source:HGNC Symbol;Acc:HGNC:6493]                                       | 5705  | 0.68 | 0.0323 | 21.0 | 8.9E-98  | 3.3E-96 |
| ENSG00000102897 | LYRM1     | LYR motif containing 1 [Source:HGNC Symbol;Acc:HGNC:25074]                                       | 1531  | 1.14 | 0.0543 | 21.0 | 4.2E-98  | 1.6E-96 |
| ENSG00000145860 | RNF145    | ring finger protein 145 [Source:HGNC Symbol;Acc:HGNC:20853]                                      | 3750  | 0.85 | 0.0402 | 21.1 | 8.3E-99  | 3.1E-97 |
| ENSG00000109472 | CPE       | carboxypeptidase E [Source:HGNC Symbol;Acc:HGNC:2303]                                            | 631   | 1.77 | 0.0836 | 21.1 | 5.8E-99  | 2.2E-97 |
| ENSG00000101187 | SLC04A1   | solute carrier organic anion transporter family member 4A1 [Source:HGNC Symbol;Acc:HGNC:10953]   | 583   | 1.78 | 0.0839 | 21.2 | 1.8E-99  | 6.9E-98 |
| ENSG00000169071 | ROR2      | receptor tyrosine kinase like orphan receptor 2 [Source:HGNC Symbol;Acc:HGNC:10257]              | 402   | 2.19 | 0.1030 | 21.2 | 6.8E-100 | 2.6E-98 |
| ENSG00000145819 | ARHGAP26  | Rho GTPase activating protein 26 [Source:HGNC Symbol;Acc:HGNC:17073]                             | 518   | 1.92 | 0.0903 | 21.2 | 3.8E-100 | 1.5E-98 |



|                 |          |                                                                                               |       |      |        |      |          |          |
|-----------------|----------|-----------------------------------------------------------------------------------------------|-------|------|--------|------|----------|----------|
| ENSG00000198931 | APRT     | adenine phosphoribosyltransferase [Source:HGNC Symbol;Acc:HGNC:626]                           | 1363  | 1.19 | 0.0559 | 21.3 | 2.5E-100 | 9.4E-99  |
| ENSG00000187446 | CHP1     | calcineurin like EF-hand protein 1 [Source:HGNC Symbol;Acc:HGNC:17433]                        | 4939  | 0.70 | 0.0329 | 21.3 | 1.2E-100 | 4.5E-99  |
| ENSG00000126005 | MMP24OS  | MMP24 opposite strand [Source:HGNC Symbol;Acc:HGNC:44421]                                     | 646   | 1.75 | 0.0820 | 21.3 | 6.9E-101 | 2.6E-99  |
| ENSG00000161203 | AP2M1    | adaptor related protein complex 2 subunit mu 1 [Source:HGNC Symbol;Acc:HGNC:564]              | 12758 | 0.55 | 0.0258 | 21.4 | 2.6E-101 | 1.0E-99  |
| ENSG00000182195 | LDOC1    | LDOC1 regulator of NFKB signaling [Source:HGNC Symbol;Acc:HGNC:6548]                          | 981   | 1.40 | 0.0651 | 21.4 | 4.6E-102 | 1.8E-100 |
| ENSG00000073008 | PVR      | PVR cell adhesion molecule [Source:HGNC Symbol;Acc:HGNC:9705]                                 | 5688  | 0.71 | 0.0329 | 21.5 | 3.3E-102 | 1.3E-100 |
| ENSG00000103148 | NPRL3    | NPRL3 like, GATOR1 complex subunit [Source:HGNC Symbol;Acc:HGNC:14124]                        | 769   | 1.56 | 0.0726 | 21.5 | 2.5E-102 | 9.5E-101 |
| ENSG00000103222 | ABCC1    | ATP binding cassette subfamily C member 1 [Source:HGNC Symbol;Acc:HGNC:51]                    | 2178  | 0.97 | 0.0449 | 21.5 | 7.4E-103 | 2.9E-101 |
| ENSG00000163975 | MELTF    | melanotransferrin [Source:HGNC Symbol;Acc:HGNC:7037]                                          | 1581  | 1.18 | 0.0546 | 21.6 | 8.3E-104 | 3.2E-102 |
| ENSG00000157168 | NRG1     | neuregulin 1 [Source:HGNC Symbol;Acc:HGNC:7997]                                               | 251   | 3.67 | 0.1694 | 21.6 | 8.1E-104 | 3.2E-102 |
| ENSG00000158747 | NBL1     | NBL1, DAN family BMP antagonist [Source:HGNC Symbol;Acc:HGNC:7650]                            | 1996  | 0.99 | 0.0458 | 21.6 | 7.8E-104 | 3.1E-102 |
| ENSG00000138061 | CYP1B1   | cytochrome P450 family 1 subfamily B member 1 [Source:HGNC Symbol;Acc:HGNC:2597]              | 5001  | 0.79 | 0.0363 | 21.7 | 4.0E-104 | 1.6E-102 |
| ENSG00000048052 | HDAC9    | histone deacetylase 9 [Source:HGNC Symbol;Acc:HGNC:14065]                                     | 277   | 3.03 | 0.1394 | 21.8 | 6.8E-105 | 2.7E-103 |
| ENSG00000107937 | GTPBP4   | GTP binding protein 4 [Source:HGNC Symbol;Acc:HGNC:21535]                                     | 2343  | 0.94 | 0.0431 | 21.8 | 3.9E-105 | 1.5E-103 |
| ENSG00000196535 | MYO18A   | myosin XVIIIa [Source:HGNC Symbol;Acc:HGNC:31104]                                             | 2130  | 0.99 | 0.0453 | 21.8 | 1.4E-105 | 5.7E-104 |
| ENSG00000139278 | GLIPR1   | GLI pathogenesis related 1 [Source:HGNC Symbol;Acc:HGNC:17001]                                | 692   | 1.69 | 0.0771 | 22.0 | 7.4E-107 | 3.0E-105 |
| ENSG00000118495 | PLAGL1   | PLAG1 like zinc finger 1 [Source:HGNC Symbol;Acc:HGNC:9046]                                   | 821   | 1.64 | 0.0748 | 22.0 | 6.3E-107 | 2.5E-105 |
| ENSG00000100726 | TELO2    | telomere maintenance 2 [Source:HGNC Symbol;Acc:HGNC:29099]                                    | 1213  | 1.31 | 0.0594 | 22.0 | 4.1E-107 | 1.6E-105 |
| ENSG00000178150 | ZNF114   | zinc finger protein 114 [Source:HGNC Symbol;Acc:HGNC:12894]                                   | 650   | 1.73 | 0.0788 | 22.0 | 3.2E-107 | 1.3E-105 |
| ENSG00000103507 | BCKDK    | branched chain keto acid dehydrogenase kinase [Source:HGNC Symbol;Acc:HGNC:16902]             | 962   | 1.41 | 0.0641 | 22.0 | 2.8E-107 | 1.1E-105 |
| ENSG00000246705 | H2AJ     | H2A.J histone [Source:HGNC Symbol;Acc:HGNC:14456]                                             | 3500  | 0.86 | 0.0389 | 22.0 | 1.8E-107 | 7.5E-106 |
| ENSG00000109586 | GALNT7   | polypeptide N-acetylgalactosaminyltransferase 7 [Source:HGNC Symbol;Acc:HGNC:4129]            | 2312  | 0.99 | 0.0449 | 22.0 | 1.3E-107 | 5.4E-106 |
| ENSG00000169504 | CLIC4    | chloride intracellular channel 4 [Source:HGNC Symbol;Acc:HGNC:13518]                          | 3583  | 0.85 | 0.0384 | 22.1 | 4.0E-108 | 1.6E-106 |
| ENSG00000163710 | PCOLCE2  | procollagen C-endopeptidase enhancer 2 [Source:HGNC Symbol;Acc:HGNC:8739]                     | 290   | 3.33 | 0.1508 | 22.1 | 3.0E-108 | 1.2E-106 |
| ENSG00000176842 | IRX5     | iroquois homeobox 5 [Source:HGNC Symbol;Acc:HGNC:14361]                                       | 344   | 2.68 | 0.1210 | 22.1 | 1.5E-108 | 6.1E-107 |
| ENSG00000153406 | NMRAL1   | NmrA like redox sensor 1 [Source:HGNC Symbol;Acc:HGNC:24987]                                  | 1123  | 1.56 | 0.0706 | 22.2 | 6.8E-109 | 2.8E-107 |
| ENSG00000135919 | SERPINE2 | serpin family E member 2 [Source:HGNC Symbol;Acc:HGNC:8951]                                   | 1154  | 1.47 | 0.0663 | 22.2 | 4.7E-109 | 2.0E-107 |
| ENSG00000169567 | HINT1    | histidine triad nucleotide binding protein 1 [Source:HGNC Symbol;Acc:HGNC:4912]               | 5241  | 0.84 | 0.0378 | 22.2 | 3.3E-109 | 1.4E-107 |
| ENSG00000096433 | ITPR3    | inositol 1,4,5-trisphosphate receptor type 3 [Source:HGNC Symbol;Acc:HGNC:6182]               | 3022  | 0.94 | 0.0422 | 22.2 | 1.2E-109 | 4.9E-108 |
| ENSG00000076067 | RBMS2    | RNA binding motif single stranded interacting protein 2 [Source:HGNC Symbol;Acc:HGNC:9909]    | 1175  | 1.36 | 0.0610 | 22.3 | 7.9E-110 | 3.3E-108 |
| ENSG00000101974 | ATP11C   | ATPase phospholipid transporting 11C [Source:HGNC Symbol;Acc:HGNC:13554]                      | 258   | 4.25 | 0.1906 | 22.3 | 5.3E-110 | 2.2E-108 |
| ENSG00000106351 | AGFG2    | ArfGAP with FG repeats 2 [Source:HGNC Symbol;Acc:HGNC:5177]                                   | 1400  | 1.28 | 0.0574 | 22.3 | 3.7E-110 | 1.6E-108 |
| ENSG00000163513 | TGFBR2   | transforming growth factor beta receptor 2 [Source:HGNC Symbol;Acc:HGNC:11773]                | 3254  | 0.85 | 0.0382 | 22.3 | 1.7E-110 | 7.2E-109 |
| ENSG00000175745 | NR2F1    | nuclear receptor subfamily 2 group F member 1 [Source:HGNC Symbol;Acc:HGNC:7975]              | 253   | 4.11 | 0.1840 | 22.3 | 1.6E-110 | 6.9E-109 |
| ENSG00000101986 | ABCD1    | ATP binding cassette subfamily D member 1 [Source:HGNC Symbol;Acc:HGNC:61]                    | 504   | 2.17 | 0.0970 | 22.4 | 6.2E-111 | 2.7E-109 |
| ENSG00000105143 | SLC1A6   | solute carrier family 1 member 6 [Source:HGNC Symbol;Acc:HGNC:10944]                          | 381   | 2.46 | 0.1098 | 22.4 | 3.7E-111 | 1.6E-109 |
| ENSG00000148841 | ITPRIP   | inositol 1,4,5-trisphosphate receptor interacting protein [Source:HGNC Symbol;Acc:HGNC:29370] | 352   | 2.72 | 0.1215 | 22.4 | 3.2E-111 | 1.4E-109 |
| ENSG00000163430 | FSTL1    | folliculin like 1 [Source:HGNC Symbol;Acc:HGNC:3972]                                          | 8718  | 0.65 | 0.0287 | 22.5 | 6.6E-112 | 2.8E-110 |
| ENSG00000163235 | TGFA     | transforming growth factor alpha [Source:HGNC Symbol;Acc:HGNC:11765]                          | 3042  | 0.96 | 0.0427 | 22.5 | 5.4E-112 | 2.4E-110 |
| ENSG00000174938 | SEZ6L2   | seizure related 6 homolog like 2 [Source:HGNC Symbol;Acc:HGNC:30844]                          | 955   | 1.61 | 0.0715 | 22.5 | 5.0E-112 | 2.2E-110 |
| ENSG00000136295 | TTYH3    | tweety family member 3 [Source:HGNC Symbol;Acc:HGNC:22222]                                    | 2966  | 0.96 | 0.0428 | 22.5 | 5.0E-112 | 2.2E-110 |
| ENSG00000128791 | TWSG1    | twisted gastrulation BMP signaling modulator 1 [Source:HGNC Symbol;Acc:HGNC:12429]            | 2219  | 0.99 | 0.0440 | 22.6 | 1.2E-112 | 5.2E-111 |

|                 |          |                                                                                                      |       |      |        |      |          |          |
|-----------------|----------|------------------------------------------------------------------------------------------------------|-------|------|--------|------|----------|----------|
| ENSG00000090905 | TNRC6A   | trinucleotide repeat containing adaptor 6A [Source:HGNC Symbol;Acc:HGNC:11969]                       | 1882  | 1.09 | 0.0481 | 22.6 | 1.1E-112 | 4.8E-111 |
| ENSG00000156515 | HK1      | hexokinase 1 [Source:HGNC Symbol;Acc:HGNC:4922]                                                      | 5744  | 0.77 | 0.0343 | 22.6 | 1.0E-112 | 4.5E-111 |
| ENSG00000108518 | PFN1     | profilin 1 [Source:HGNC Symbol;Acc:HGNC:8881]                                                        | 20329 | 0.53 | 0.0233 | 22.6 | 7.7E-113 | 3.4E-111 |
| ENSG00000111331 | OAS3     | 2'-5'-oligoadenylate synthetase 3 [Source:HGNC Symbol;Acc:HGNC:8088]                                 | 10870 | 0.62 | 0.0273 | 22.6 | 1.9E-113 | 8.7E-112 |
| ENSG00000127564 | PKMYT1   | protein kinase, membrane associated tyrosine/threonine 1 [Source:HGNC Symbol;Acc:HGNC:29650]         | 1443  | 1.33 | 0.0586 | 22.7 | 7.8E-114 | 3.5E-112 |
| ENSG00000134531 | EMP1     | epithelial membrane protein 1 [Source:HGNC Symbol;Acc:HGNC:3333]                                     | 4647  | 0.87 | 0.0383 | 22.7 | 6.4E-114 | 2.9E-112 |
| ENSG00000261040 | WFDC21P  | WAP four-disulfide core domain 21, pseudogene [Source:HGNC Symbol;Acc:HGNC:50357]                    | 258   | 4.11 | 0.1810 | 22.7 | 2.7E-114 | 1.2E-112 |
| ENSG00000184368 | MAP7D2   | MAP7 domain containing 2 [Source:HGNC Symbol;Acc:HGNC:25899]                                         | 265   | 3.79 | 0.1663 | 22.8 | 7.9E-115 | 3.6E-113 |
| ENSG00000168453 | HR       | HR lysine demethylase and nuclear receptor corepressor [Source:HGNC Symbol;Acc:HGNC:5172]            | 477   | 2.30 | 0.1006 | 22.8 | 3.9E-115 | 1.8E-113 |
| ENSG00000125166 | GOT2     | glutamic-oxaloacetic transaminase 2 [Source:HGNC Symbol;Acc:HGNC:4433]                               | 3483  | 0.94 | 0.0410 | 22.8 | 1.7E-115 | 7.9E-114 |
| ENSG00000237515 | SHISA9   | shisa family member 9 [Source:HGNC Symbol;Acc:HGNC:37231]                                            | 669   | 1.79 | 0.0782 | 22.9 | 1.5E-115 | 6.7E-114 |
| ENSG00000140983 | RHOT2    | ras homolog family member T2 [Source:HGNC Symbol;Acc:HGNC:21169]                                     | 1731  | 1.14 | 0.0500 | 22.9 | 1.3E-115 | 5.9E-114 |
| ENSG00000161091 | MFSD12   | major facilitator superfamily domain containing 12 [Source:HGNC Symbol;Acc:HGNC:28299]               | 1258  | 1.28 | 0.0562 | 22.9 | 1.3E-115 | 5.8E-114 |
| ENSG00000170027 | YWHAG    | tyrosine 3-monooxygenase/tryptophan 5-monooxygenase activation protein gamma [Source:HGNC Syn        | 7709  | 0.70 | 0.0307 | 22.9 | 7.3E-116 | 3.4E-114 |
| ENSG00000101150 | TPD52L2  | TPD52 like 2 [Source:HGNC Symbol;Acc:HGNC:12007]                                                     | 7075  | 0.75 | 0.0328 | 23.0 | 1.1E-116 | 5.1E-115 |
| ENSG00000128641 | MYO1B    | myosin IB [Source:HGNC Symbol;Acc:HGNC:7596]                                                         | 6608  | 0.74 | 0.0319 | 23.1 | 9.8E-118 | 4.6E-116 |
| ENSG00000148346 | LCN2     | lipocalin 2 [Source:HGNC Symbol;Acc:HGNC:6526]                                                       | 276   | 4.64 | 0.2011 | 23.1 | 7.5E-118 | 3.5E-116 |
| ENSG00000089280 | FUS      | FUS RNA binding protein [Source:HGNC Symbol;Acc:HGNC:4010]                                           | 9700  | 0.70 | 0.0301 | 23.1 | 2.6E-118 | 1.2E-116 |
| ENSG00000167965 | MLST8    | MTOR associated protein, LST8 homolog [Source:HGNC Symbol;Acc:HGNC:24825]                            | 1172  | 1.35 | 0.0584 | 23.1 | 1.8E-118 | 8.5E-117 |
| ENSG00000102900 | NUP93    | nucleoporin 93 [Source:HGNC Symbol;Acc:HGNC:28958]                                                   | 3437  | 0.95 | 0.0409 | 23.3 | 2.3E-120 | 1.1E-118 |
| ENSG00000140105 | WARS1    | tryptophanyl-tRNA synthetase 1 [Source:HGNC Symbol;Acc:HGNC:12729]                                   | 4063  | 0.81 | 0.0348 | 23.3 | 2.2E-120 | 1.0E-118 |
| ENSG00000158089 | GALNT14  | polypeptide N-acetylgalactosaminyltransferase 14 [Source:HGNC Symbol;Acc:HGNC:22946]                 | 586   | 2.05 | 0.0878 | 23.4 | 1.0E-120 | 5.0E-119 |
| ENSG00000164237 | CMBL     | carboxymethylenebutenolidase homolog [Source:HGNC Symbol;Acc:HGNC:25090]                             | 1503  | 1.26 | 0.0537 | 23.4 | 8.0E-121 | 3.9E-119 |
| ENSG00000148468 | FAM171A1 | family with sequence similarity 171 member A1 [Source:HGNC Symbol;Acc:HGNC:23522]                    | 784   | 1.78 | 0.0762 | 23.4 | 7.2E-121 | 3.5E-119 |
| ENSG00000187498 | COL4A1   | collagen type IV alpha 1 chain [Source:HGNC Symbol;Acc:HGNC:2202]                                    | 1450  | 1.28 | 0.0545 | 23.5 | 1.1E-121 | 5.3E-120 |
| ENSG00000134308 | YWHAQ    | tyrosine 3-monooxygenase/tryptophan 5-monooxygenase activation protein theta [Source:HGNC Symb       | 11680 | 0.63 | 0.0268 | 23.5 | 1.4E-122 | 6.8E-121 |
| ENSG00000143153 | ATP1B1   | ATPase Na <sup>+</sup> /K <sup>+</sup> transporting subunit beta 1 [Source:HGNC Symbol;Acc:HGNC:804] | 4183  | 2.20 | 0.0934 | 23.5 | 1.4E-122 | 6.8E-121 |
| ENSG00000142798 | HSPG2    | heparan sulfate proteoglycan 2 [Source:HGNC Symbol;Acc:HGNC:5273]                                    | 5459  | 0.83 | 0.0352 | 23.6 | 3.9E-123 | 1.9E-121 |
| ENSG00000142089 | IFITM3   | interferon induced transmembrane protein 3 [Source:HGNC Symbol;Acc:HGNC:5414]                        | 6323  | 0.75 | 0.0315 | 23.7 | 1.9E-124 | 9.3E-123 |
| ENSG00000134871 | COL4A2   | collagen type IV alpha 2 chain [Source:HGNC Symbol;Acc:HGNC:2203]                                    | 3036  | 0.96 | 0.0406 | 23.8 | 7.9E-125 | 4.0E-123 |
| ENSG00000105519 | CAPS     | calcyphosine [Source:HGNC Symbol;Acc:HGNC:1487]                                                      | 589   | 2.05 | 0.0859 | 23.8 | 1.7E-125 | 8.7E-124 |
| ENSG00000103363 | ELOB     | elongin B [Source:HGNC Symbol;Acc:HGNC:11619]                                                        | 3582  | 0.95 | 0.0400 | 23.8 | 1.1E-125 | 5.5E-124 |
| ENSG00000144959 | NCEH1    | neutral cholesterol ester hydrolase 1 [Source:HGNC Symbol;Acc:HGNC:29260]                            | 1483  | 1.33 | 0.0556 | 23.9 | 1.8E-126 | 9.1E-125 |
| ENSG00000187555 | USP7     | ubiquitin specific peptidase 7 [Source:HGNC Symbol;Acc:HGNC:12630]                                   | 2330  | 1.07 | 0.0446 | 24.0 | 2.7E-127 | 1.4E-125 |
| ENSG00000187957 | DNER     | delta/notch like EGF repeat containing [Source:HGNC Symbol;Acc:HGNC:24456]                           | 593   | 2.03 | 0.0845 | 24.0 | 1.2E-127 | 6.4E-126 |
| ENSG00000160691 | SHC1     | SHC adaptor protein 1 [Source:HGNC Symbol;Acc:HGNC:10840]                                            | 2077  | 1.08 | 0.0449 | 24.1 | 3.7E-128 | 1.9E-126 |
| ENSG00000169217 | CD2BP2   | CD2 cytoplasmic tail binding protein 2 [Source:HGNC Symbol;Acc:HGNC:1656]                            | 2330  | 1.08 | 0.0446 | 24.1 | 1.5E-128 | 7.8E-127 |
| ENSG00000198363 | ASPH     | aspartate beta-hydroxylase [Source:HGNC Symbol;Acc:HGNC:757]                                         | 6440  | 0.77 | 0.0319 | 24.2 | 4.2E-129 | 2.2E-127 |
| ENSG00000174939 | ASPHD1   | aspartate beta-hydroxylase domain containing 1 [Source:HGNC Symbol;Acc:HGNC:27380]                   | 325   | 3.30 | 0.1361 | 24.2 | 1.1E-129 | 6.0E-128 |
| ENSG00000087245 | MMP2     | matrix metalloproteinase 2 [Source:HGNC Symbol;Acc:HGNC:7166]                                        | 590   | 2.16 | 0.0884 | 24.4 | 2.6E-131 | 1.4E-129 |
| ENSG00000103549 | RNF40    | ring finger protein 40 [Source:HGNC Symbol;Acc:HGNC:16867]                                           | 2542  | 1.02 | 0.0418 | 24.4 | 1.8E-131 | 9.8E-130 |
| ENSG00000205937 | RNPS1    | RNA binding protein with serine rich domain 1 [Source:HGNC Symbol;Acc:HGNC:10080]                    | 3401  | 0.91 | 0.0372 | 24.4 | 1.6E-131 | 8.8E-130 |

|                 |          |                                                                                                  |        |      |        |      |          |          |
|-----------------|----------|--------------------------------------------------------------------------------------------------|--------|------|--------|------|----------|----------|
| ENSG00000125148 | MT2A     | metallothionein 2A [Source:HGNC Symbol;Acc:HGNC:7406]                                            | 5618   | 0.95 | 0.0387 | 24.4 | 5.7E-132 | 3.1E-130 |
| ENSG00000197582 | GPX1P1   | glutathione peroxidase pseudogene 1 [Source:HGNC Symbol;Acc:HGNC:4560]                           | 939    | 1.74 | 0.0711 | 24.5 | 1.4E-132 | 7.3E-131 |
| ENSG00000099250 | NRP1     | neuropilin 1 [Source:HGNC Symbol;Acc:HGNC:8004]                                                  | 491    | 2.43 | 0.0990 | 24.6 | 2.8E-133 | 1.5E-131 |
| ENSG00000105953 | OGDH     | oxoglutarate dehydrogenase [Source:HGNC Symbol;Acc:HGNC:8124]                                    | 6012   | 0.82 | 0.0333 | 24.6 | 3.8E-134 | 2.0E-132 |
| ENSG00000104447 | TRPS1    | transcriptional repressor GATA binding 1 [Source:HGNC Symbol;Acc:HGNC:12340]                     | 332    | 5.18 | 0.2100 | 24.7 | 2.4E-134 | 1.3E-132 |
| ENSG00000130175 | PRKCSH   | protein kinase C substrate 80K-H [Source:HGNC Symbol;Acc:HGNC:9411]                              | 7867   | 0.71 | 0.0290 | 24.7 | 1.6E-134 | 8.9E-133 |
| ENSG00000111335 | OAS2     | 2'-5'-oligoadenylate synthetase 2 [Source:HGNC Symbol;Acc:HGNC:8087]                             | 2932   | 1.05 | 0.0424 | 24.7 | 8.0E-135 | 4.4E-133 |
| ENSG00000071127 | WDR1     | WD repeat domain 1 [Source:HGNC Symbol;Acc:HGNC:12754]                                           | 17096  | 0.68 | 0.0273 | 24.7 | 3.3E-135 | 1.8E-133 |
| ENSG00000086504 | MRPL28   | mitochondrial ribosomal protein L28 [Source:HGNC Symbol;Acc:HGNC:14484]                          | 1745   | 1.31 | 0.0529 | 24.8 | 1.5E-135 | 8.3E-134 |
| ENSG00000166289 | PLEKHF1  | pleckstrin homology and FYVE domain containing 1 [Source:HGNC Symbol;Acc:HGNC:20764]             | 700    | 1.90 | 0.0768 | 24.8 | 9.7E-136 | 5.4E-134 |
| ENSG00000138646 | HERC5    | HECT and RLD domain containing E3 ubiquitin protein ligase 5 [Source:HGNC Symbol;Acc:HGNC:24368] | 2035   | 1.23 | 0.0495 | 24.9 | 7.1E-137 | 4.0E-135 |
| ENSG00000172819 | RARG     | retinoic acid receptor gamma [Source:HGNC Symbol;Acc:HGNC:9866]                                  | 2075   | 1.16 | 0.0465 | 24.9 | 3.3E-137 | 1.9E-135 |
| ENSG00000122863 | CHST3    | carbohydrate sulfotransferase 3 [Source:HGNC Symbol;Acc:HGNC:1971]                               | 1630   | 1.28 | 0.0514 | 25.0 | 1.6E-137 | 8.9E-136 |
| ENSG00000178952 | TUFM     | Tu translation elongation factor, mitochondrial [Source:HGNC Symbol;Acc:HGNC:12420]              | 3601   | 1.09 | 0.0435 | 25.0 | 1.4E-137 | 8.2E-136 |
| ENSG00000128656 | CHN1     | chimerin 1 [Source:HGNC Symbol;Acc:HGNC:1943]                                                    | 321    | 4.65 | 0.1862 | 25.0 | 9.3E-138 | 5.3E-136 |
| ENSG00000113070 | HBEGF    | heparin binding EGF like growth factor [Source:HGNC Symbol;Acc:HGNC:3059]                        | 854    | 1.85 | 0.0740 | 25.1 | 1.5E-138 | 8.6E-137 |
| ENSG00000077238 | IL4R     | interleukin 4 receptor [Source:HGNC Symbol;Acc:HGNC:6015]                                        | 1047   | 1.58 | 0.0630 | 25.1 | 5.2E-139 | 3.1E-137 |
| ENSG00000198517 | MAFK     | MAF bZIP transcription factor K [Source:HGNC Symbol;Acc:HGNC:6782]                               | 2180   | 1.13 | 0.0449 | 25.1 | 3.3E-139 | 1.9E-137 |
| ENSG00000173482 | PTPRM    | protein tyrosine phosphatase receptor type M [Source:HGNC Symbol;Acc:HGNC:9675]                  | 1221   | 1.54 | 0.0612 | 25.1 | 2.9E-139 | 1.7E-137 |
| ENSG00000075624 | ACTB     | actin beta [Source:HGNC Symbol;Acc:HGNC:132]                                                     | 163129 | 0.60 | 0.0240 | 25.2 | 1.2E-139 | 7.1E-138 |
| ENSG00000176014 | TUBB6    | tubulin beta 6 class V [Source:HGNC Symbol;Acc:HGNC:20776]                                       | 7400   | 0.77 | 0.0304 | 25.3 | 3.3E-141 | 1.9E-139 |
| ENSG00000139211 | AMIGO2   | adhesion molecule with Ig like domain 2 [Source:HGNC Symbol;Acc:HGNC:24073]                      | 1189   | 1.63 | 0.0642 | 25.3 | 1.7E-141 | 1.0E-139 |
| ENSG00000034152 | MAP2K3   | mitogen-activated protein kinase kinase 3 [Source:HGNC Symbol;Acc:HGNC:6843]                     | 1474   | 1.41 | 0.0555 | 25.3 | 1.3E-141 | 7.6E-140 |
| ENSG00000172380 | GNG12    | G protein subunit gamma 12 [Source:HGNC Symbol;Acc:HGNC:19663]                                   | 2371   | 1.09 | 0.0429 | 25.3 | 1.0E-141 | 6.2E-140 |
| ENSG00000157601 | MX1      | MX dynamin like GTPase 1 [Source:HGNC Symbol;Acc:HGNC:7532]                                      | 11370  | 0.71 | 0.0279 | 25.5 | 6.3E-143 | 3.8E-141 |
| ENSG00000069011 | PITX1    | paired like homeodomain 1 [Source:HGNC Symbol;Acc:HGNC:9004]                                     | 733    | 2.09 | 0.0820 | 25.5 | 3.0E-143 | 1.8E-141 |
| ENSG00000169515 | CCDC8    | coiled-coil domain containing 8 [Source:HGNC Symbol;Acc:HGNC:25367]                              | 334    | 4.27 | 0.1676 | 25.5 | 2.7E-143 | 1.6E-141 |
| ENSG00000161011 | SQSTM1   | sequestosome 1 [Source:HGNC Symbol;Acc:HGNC:11280]                                               | 1630   | 1.35 | 0.0528 | 25.5 | 2.2E-143 | 1.4E-141 |
| ENSG00000140990 | NDUFB10  | NADH:ubiquinone oxidoreductase subunit B10 [Source:HGNC Symbol;Acc:HGNC:7696]                    | 1717   | 1.38 | 0.0538 | 25.6 | 1.4E-144 | 8.7E-143 |
| ENSG00000170017 | ALCAM    | activated leukocyte cell adhesion molecule [Source:HGNC Symbol;Acc:HGNC:400]                     | 584    | 2.24 | 0.0874 | 25.7 | 3.3E-145 | 2.1E-143 |
| ENSG00000141401 | IMPA2    | inositol monophosphatase 2 [Source:HGNC Symbol;Acc:HGNC:6051]                                    | 1527   | 1.56 | 0.0606 | 25.8 | 2.0E-146 | 1.3E-144 |
| ENSG00000140950 | MEAK7    | MTOR associated protein, eak-7 homolog [Source:HGNC Symbol;Acc:HGNC:29325]                       | 560    | 2.42 | 0.0937 | 25.8 | 1.3E-146 | 8.5E-145 |
| ENSG00000110446 | SLC15A3  | solute carrier family 15 member 3 [Source:HGNC Symbol;Acc:HGNC:18068]                            | 710    | 2.06 | 0.0795 | 25.8 | 2.6E-147 | 1.6E-145 |
| ENSG00000179604 | CDC42EP4 | CDC42 effector protein 4 [Source:HGNC Symbol;Acc:HGNC:17147]                                     | 789    | 1.89 | 0.0730 | 25.9 | 1.3E-147 | 8.4E-146 |
| ENSG00000198142 | SOWAHC   | sosonowah ankyrin repeat domain family member C [Source:HGNC Symbol;Acc:HGNC:26149]              | 1285   | 1.51 | 0.0584 | 25.9 | 1.3E-147 | 8.1E-146 |
| ENSG00000101608 | MYL12A   | myosin light chain 12A [Source:HGNC Symbol;Acc:HGNC:16701]                                       | 4258   | 1.02 | 0.0394 | 25.9 | 3.9E-148 | 2.5E-146 |
| ENSG00000131459 | GFPT2    | glutamine-fructose-6-phosphate transaminase 2 [Source:HGNC Symbol;Acc:HGNC:4242]                 | 362    | 3.78 | 0.1454 | 26.0 | 2.9E-149 | 1.9E-147 |
| ENSG00000177200 | CHD9     | chromodomain helicase DNA binding protein 9 [Source:HGNC Symbol;Acc:HGNC:25701]                  | 1271   | 1.50 | 0.0574 | 26.1 | 3.1E-150 | 2.0E-148 |
| ENSG00000124201 | ZNFX1    | zinc finger NFX1-type containing 1 [Source:HGNC Symbol;Acc:HGNC:29271]                           | 6916   | 0.76 | 0.0292 | 26.2 | 7.3E-151 | 4.8E-149 |
| ENSG00000189067 | LITAF    | lipopolysaccharide induced TNF factor [Source:HGNC Symbol;Acc:HGNC:16841]                        | 9907   | 0.76 | 0.0289 | 26.2 | 1.1E-151 | 7.6E-150 |
| ENSG00000116962 | NID1     | nidogen 1 [Source:HGNC Symbol;Acc:HGNC:7821]                                                     | 1525   | 1.46 | 0.0556 | 26.3 | 2.2E-152 | 1.5E-150 |
| ENSG00000138834 | MAPK8IP3 | mitogen-activated protein kinase 8 interacting protein 3 [Source:HGNC Symbol;Acc:HGNC:6884]      | 1507   | 1.45 | 0.0549 | 26.4 | 7.1E-154 | 4.7E-152 |

|                 |          |                                                                                          |       |      |        |      |          |          |
|-----------------|----------|------------------------------------------------------------------------------------------|-------|------|--------|------|----------|----------|
| ENSG00000008394 | MGST1    | microsomal glutathione S-transferase 1 [Source:HGNC Symbol;Acc:HGNC:7061]                | 3584  | 1.00 | 0.0379 | 26.5 | 3.4E-154 | 2.3E-152 |
| ENSG00000197077 | KIAA1671 | KIAA1671 [Source:HGNC Symbol;Acc:HGNC:29345]                                             | 2712  | 1.18 | 0.0445 | 26.6 | 4.3E-156 | 2.9E-154 |
| ENSG00000181163 | NPM1     | nucleophosmin 1 [Source:HGNC Symbol;Acc:HGNC:7910]                                       | 36884 | 0.67 | 0.0251 | 26.7 | 7.7E-157 | 5.2E-155 |
| ENSG00000175592 | FOSL1    | FOS like 1, AP-1 transcription factor subunit [Source:HGNC Symbol;Acc:HGNC:13718]        | 506   | 2.78 | 0.1040 | 26.7 | 2.5E-157 | 1.7E-155 |
| ENSG00000171867 | PRNP     | prion protein [Source:HGNC Symbol;Acc:HGNC:9449]                                         | 2822  | 1.14 | 0.0423 | 26.9 | 5.7E-159 | 4.0E-157 |
| ENSG00000242265 | PEG10    | paternally expressed 10 [Source:HGNC Symbol;Acc:HGNC:14005]                              | 7937  | 0.84 | 0.0313 | 26.9 | 2.9E-159 | 2.1E-157 |
| ENSG00000108175 | ZMIZ1    | zinc finger MIZ-type containing 1 [Source:HGNC Symbol;Acc:HGNC:16493]                    | 936   | 1.95 | 0.0726 | 26.9 | 2.1E-159 | 1.5E-157 |
| ENSG00000114353 | GNAI2    | G protein subunit alpha i2 [Source:HGNC Symbol;Acc:HGNC:4385]                            | 2410  | 1.19 | 0.0441 | 27.0 | 4.1E-161 | 2.9E-159 |
| ENSG00000147454 | SLC25A37 | solute carrier family 25 member 37 [Source:HGNC Symbol;Acc:HGNC:29786]                   | 1527  | 1.54 | 0.0569 | 27.1 | 1.2E-161 | 8.8E-160 |
| ENSG00000106266 | SNX8     | sorting nexin 8 [Source:HGNC Symbol;Acc:HGNC:14972]                                      | 3394  | 1.08 | 0.0398 | 27.2 | 4.9E-163 | 3.5E-161 |
| ENSG00000072682 | P4HA2    | prolyl 4-hydroxylase subunit alpha 2 [Source:HGNC Symbol;Acc:HGNC:8547]                  | 1464  | 1.52 | 0.0555 | 27.4 | 3.0E-165 | 2.1E-163 |
| ENSG00000104998 | IL27RA   | interleukin 27 receptor subunit alpha [Source:HGNC Symbol;Acc:HGNC:17290]                | 750   | 2.13 | 0.0776 | 27.4 | 2.7E-165 | 2.0E-163 |
| ENSG00000104419 | NDRG1    | N-myc downstream regulated 1 [Source:HGNC Symbol;Acc:HGNC:7679]                          | 7384  | 0.82 | 0.0298 | 27.4 | 1.7E-165 | 1.2E-163 |
| ENSG00000134668 | SPOCD1   | SPOC domain containing 1 [Source:HGNC Symbol;Acc:HGNC:26338]                             | 482   | 3.02 | 0.1098 | 27.4 | 7.2E-166 | 5.3E-164 |
| ENSG00000170525 | PFKFB3   | 6-phosphofructo-2-kinase/fructose-2,6-biphosphatase 3 [Source:HGNC Symbol;Acc:HGNC:8874] | 993   | 1.80 | 0.0653 | 27.5 | 8.8E-167 | 6.6E-165 |
| ENSG00000151491 | EPS8     | epidermal growth factor receptor pathway substrate 8 [Source:HGNC Symbol;Acc:HGNC:3420]  | 811   | 2.02 | 0.0733 | 27.5 | 7.4E-167 | 5.5E-165 |
| ENSG00000153048 | CARHSP1  | calcium regulated heat stable protein 1 [Source:HGNC Symbol;Acc:HGNC:17150]              | 1459  | 1.57 | 0.0570 | 27.5 | 4.6E-167 | 3.4E-165 |
| ENSG00000184254 | ALDH1A3  | aldehyde dehydrogenase 1 family member A3 [Source:HGNC Symbol;Acc:HGNC:409]              | 717   | 2.28 | 0.0826 | 27.6 | 3.0E-167 | 2.3E-165 |
| ENSG00000103342 | GSPT1    | G1 to S phase transition 1 [Source:HGNC Symbol;Acc:HGNC:4621]                            | 8374  | 0.84 | 0.0304 | 27.6 | 7.7E-168 | 5.8E-166 |
| ENSG00000169180 | XPO6     | exportin 6 [Source:HGNC Symbol;Acc:HGNC:19733]                                           | 3122  | 1.07 | 0.0389 | 27.6 | 5.2E-168 | 4.0E-166 |
| ENSG00000127418 | FGFRL1   | fibroblast growth factor receptor like 1 [Source:HGNC Symbol;Acc:HGNC:3693]              | 615   | 2.52 | 0.0908 | 27.8 | 1.6E-169 | 1.2E-167 |
| ENSG00000266412 | NCOA4    | nuclear receptor coactivator 4 [Source:HGNC Symbol;Acc:HGNC:7671]                        | 2967  | 1.13 | 0.0405 | 28.0 | 6.4E-172 | 4.9E-170 |
| ENSG00000011422 | PLAUR    | plasminogen activator, urokinase receptor [Source:HGNC Symbol;Acc:HGNC:9053]             | 1699  | 1.59 | 0.0568 | 28.0 | 5.0E-172 | 3.9E-170 |
| ENSG00000172137 | CALB2    | calbindin 2 [Source:HGNC Symbol;Acc:HGNC:1435]                                           | 430   | 3.78 | 0.1339 | 28.2 | 2.7E-175 | 2.1E-173 |
| ENSG00000179820 | MYADM    | myeloid associated differentiation marker [Source:HGNC Symbol;Acc:HGNC:7544]             | 1929  | 1.40 | 0.0494 | 28.2 | 1.8E-175 | 1.4E-173 |
| ENSG00000243566 | UPK3B    | uroplakin 3B [Source:HGNC Symbol;Acc:HGNC:21444]                                         | 3281  | 1.12 | 0.0396 | 28.4 | 5.4E-177 | 4.3E-175 |
| ENSG00000139926 | FRMD6    | FERM domain containing 6 [Source:HGNC Symbol;Acc:HGNC:19839]                             | 1662  | 1.48 | 0.0521 | 28.4 | 1.1E-177 | 8.4E-176 |
| ENSG00000134333 | LDHA     | lactate dehydrogenase A [Source:HGNC Symbol;Acc:HGNC:6535]                               | 28504 | 0.78 | 0.0273 | 28.5 | 4.0E-178 | 3.2E-176 |
| ENSG00000148484 | RSU1     | Ras suppressor protein 1 [Source:HGNC Symbol;Acc:HGNC:10464]                             | 1566  | 1.64 | 0.0574 | 28.5 | 1.3E-178 | 1.0E-176 |
| ENSG00000127022 | CANX     | calnexin [Source:HGNC Symbol;Acc:HGNC:1473]                                              | 7732  | 0.81 | 0.0284 | 28.5 | 6.6E-179 | 5.4E-177 |
| ENSG00000182963 | GJC1     | gap junction protein gamma 1 [Source:HGNC Symbol;Acc:HGNC:4280]                          | 617   | 2.58 | 0.0904 | 28.6 | 9.4E-180 | 7.6E-178 |
| ENSG00000130707 | ASS1     | argininosuccinate synthase 1 [Source:HGNC Symbol;Acc:HGNC:758]                           | 573   | 2.74 | 0.0953 | 28.8 | 7.9E-182 | 6.6E-180 |
| ENSG00000075618 | FSCN1    | fascin actin-bundling protein 1 [Source:HGNC Symbol;Acc:HGNC:11148]                      | 2464  | 1.35 | 0.0467 | 28.8 | 6.1E-183 | 5.1E-181 |
| ENSG00000124831 | LRRFIP1  | LRR binding FLLI interacting protein 1 [Source:HGNC Symbol;Acc:HGNC:6702]                | 2235  | 1.40 | 0.0484 | 28.9 | 3.1E-184 | 2.6E-182 |
| ENSG00000125844 | RRBP1    | ribosome binding protein 1 [Source:HGNC Symbol;Acc:HGNC:10448]                           | 4902  | 0.97 | 0.0335 | 28.9 | 3.0E-184 | 2.6E-182 |
| ENSG00000149923 | PPP4C    | protein phosphatase 4 catalytic subunit [Source:HGNC Symbol;Acc:HGNC:9319]               | 3681  | 1.11 | 0.0382 | 29.1 | 1.0E-186 | 9.1E-185 |
| ENSG00000184009 | ACTG1    | actin gamma 1 [Source:HGNC Symbol;Acc:HGNC:144]                                          | 70259 | 0.78 | 0.0268 | 29.2 | 2.3E-187 | 2.0E-185 |
| ENSG00000147650 | LRP12    | LDL receptor related protein 12 [Source:HGNC Symbol;Acc:HGNC:31708]                      | 626   | 2.63 | 0.0902 | 29.2 | 1.5E-187 | 1.3E-185 |
| ENSG00000106608 | URGCP    | upregulator of cell proliferation [Source:HGNC Symbol;Acc:HGNC:30890]                    | 2289  | 1.31 | 0.0446 | 29.3 | 1.4E-188 | 1.2E-186 |
| ENSG00000171314 | PGAM1    | phosphoglycerate mutase 1 [Source:HGNC Symbol;Acc:HGNC:8888]                             | 15201 | 0.79 | 0.0268 | 29.3 | 5.2E-189 | 4.6E-187 |
| ENSG00000138193 | PLCE1    | phospholipase C epsilon 1 [Source:HGNC Symbol;Acc:HGNC:17175]                            | 527   | 3.17 | 0.1081 | 29.3 | 3.2E-189 | 2.9E-187 |
| ENSG00000206053 | JPT2     | Jupiter microtubule associated homolog 2 [Source:HGNC Symbol;Acc:HGNC:14137]             | 3005  | 1.22 | 0.0417 | 29.4 | 2.1E-189 | 1.9E-187 |

|                 |          |                                                                                                |       |      |        |      |          |          |
|-----------------|----------|------------------------------------------------------------------------------------------------|-------|------|--------|------|----------|----------|
| ENSG00000196924 | FLNA     | filamin A [Source:HGNC Symbol;Acc:HGNC:3754]                                                   | 39304 | 0.79 | 0.0268 | 29.4 | 1.7E-189 | 1.5E-187 |
| ENSG00000137965 | IFI44    | interferon induced protein 44 [Source:HGNC Symbol;Acc:HGNC:16938]                              | 2766  | 1.22 | 0.0417 | 29.4 | 1.4E-189 | 1.3E-187 |
| ENSG00000197930 | ERO1A    | endoplasmic reticulum oxidoreductase 1 alpha [Source:HGNC Symbol;Acc:HGNC:13280]               | 2796  | 1.23 | 0.0417 | 29.5 | 1.2E-191 | 1.2E-189 |
| ENSG00000169813 | HNRNPF   | heterogeneous nuclear ribonucleoprotein F [Source:HGNC Symbol;Acc:HGNC:5039]                   | 4141  | 1.05 | 0.0356 | 29.5 | 1.2E-191 | 1.1E-189 |
| ENSG00000140682 | TGFB11   | transforming growth factor beta 1 induced transcript 1 [Source:HGNC Symbol;Acc:HGNC:11767]     | 755   | 2.31 | 0.0779 | 29.6 | 1.3E-192 | 1.3E-190 |
| ENSG00000106052 | TAX1BP1  | Tax1 binding protein 1 [Source:HGNC Symbol;Acc:HGNC:11575]                                     | 6852  | 0.87 | 0.0293 | 29.6 | 4.3E-193 | 4.0E-191 |
| ENSG00000088340 | FER1L4   | fer-1 like family member 4 (pseudogene) [Source:HGNC Symbol;Acc:HGNC:15801]                    | 778   | 2.34 | 0.0788 | 29.7 | 3.2E-193 | 3.1E-191 |
| ENSG00000107863 | ARHGAP21 | Rho GTPase activating protein 21 [Source:HGNC Symbol;Acc:HGNC:23725]                           | 3293  | 1.19 | 0.0400 | 29.7 | 1.6E-193 | 1.6E-191 |
| ENSG00000156928 | MALSU1   | mitochondrial assembly of ribosomal large subunit 1 [Source:HGNC Symbol;Acc:HGNC:21721]        | 2791  | 1.23 | 0.0414 | 29.7 | 1.1E-193 | 1.1E-191 |
| ENSG00000167772 | ANGPTL4  | angiopoietin like 4 [Source:HGNC Symbol;Acc:HGNC:16039]                                        | 637   | 2.67 | 0.0897 | 29.7 | 4.6E-194 | 4.4E-192 |
| ENSG00000111341 | MGP      | matrix Gla protein [Source:HGNC Symbol;Acc:HGNC:7060]                                          | 475   | 3.78 | 0.1265 | 29.9 | 1.6E-196 | 1.6E-194 |
| ENSG00000251562 | MALAT1   | metastasis associated lung adenocarcinoma transcript 1 [Source:HGNC Symbol;Acc:HGNC:29665]     | 7168  | 0.96 | 0.0321 | 30.0 | 1.3E-197 | 1.3E-195 |
| ENSG00000136193 | SCRN1    | secernin 1 [Source:HGNC Symbol;Acc:HGNC:22192]                                                 | 7964  | 0.89 | 0.0296 | 30.0 | 2.7E-198 | 2.6E-196 |
| ENSG00000164251 | F2RL1    | F2R like trypsin receptor 1 [Source:HGNC Symbol;Acc:HGNC:3538]                                 | 1423  | 1.77 | 0.0586 | 30.2 | 7.1E-201 | 7.0E-199 |
| ENSG00000051523 | CYBA     | cytochrome b-245 alpha chain [Source:HGNC Symbol;Acc:HGNC:2577]                                | 940   | 2.44 | 0.0803 | 30.3 | 7.3E-202 | 7.2E-200 |
| ENSG00000173599 | PC       | pyruvate carboxylase [Source:HGNC Symbol;Acc:HGNC:8636]                                        | 1095  | 2.03 | 0.0667 | 30.4 | 1.3E-203 | 1.3E-201 |
| ENSG00000168610 | STAT3    | signal transducer and activator of transcription 3 [Source:HGNC Symbol;Acc:HGNC:11364]         | 5517  | 1.02 | 0.0334 | 30.5 | 3.1E-204 | 3.1E-202 |
| ENSG00000198796 | ALPK2    | alpha kinase 2 [Source:HGNC Symbol;Acc:HGNC:20565]                                             | 588   | 3.08 | 0.1011 | 30.5 | 1.2E-204 | 1.2E-202 |
| ENSG00000213281 | NRAS     | NRAS proto-oncogene, GTPase [Source:HGNC Symbol;Acc:HGNC:7989]                                 | 1331  | 2.02 | 0.0662 | 30.5 | 6.2E-205 | 6.3E-203 |
| ENSG00000167978 | SRRM2    | serine/arginine repetitive matrix 2 [Source:HGNC Symbol;Acc:HGNC:16639]                        | 7770  | 1.09 | 0.0357 | 30.6 | 4.5E-206 | 4.6E-204 |
| ENSG00000125753 | VASP     | vasodilator stimulated phosphoprotein [Source:HGNC Symbol;Acc:HGNC:12652]                      | 3894  | 1.14 | 0.0373 | 30.7 | 1.4E-206 | 1.5E-204 |
| ENSG00000130589 | HELZ2    | helicase with zinc finger 2 [Source:HGNC Symbol;Acc:HGNC:30021]                                | 8214  | 0.92 | 0.0299 | 30.7 | 2.0E-207 | 2.1E-205 |
| ENSG00000144821 | MYH15    | myosin heavy chain 15 [Source:HGNC Symbol;Acc:HGNC:31073]                                      | 901   | 2.18 | 0.0705 | 31.0 | 1.3E-210 | 1.4E-208 |
| ENSG00000072786 | STK10    | serine/threonine kinase 10 [Source:HGNC Symbol;Acc:HGNC:11388]                                 | 2391  | 1.36 | 0.0439 | 31.1 | 3.8E-212 | 4.0E-210 |
| ENSG00000106049 | HIBADH   | 3-hydroxyisobutyrate dehydrogenase [Source:HGNC Symbol;Acc:HGNC:4907]                          | 1531  | 1.78 | 0.0570 | 31.3 | 1.4E-214 | 1.5E-212 |
| ENSG00000186522 | SEPTIN10 | septin 10 [Source:HGNC Symbol;Acc:HGNC:14349]                                                  | 1369  | 1.82 | 0.0577 | 31.5 | 7.7E-218 | 8.3E-216 |
| ENSG00000245532 | NEAT1    | nuclear paraspeckle assembly transcript 1 [Source:HGNC Symbol;Acc:HGNC:30815]                  | 10836 | 0.98 | 0.0308 | 31.6 | 1.1E-219 | 1.2E-217 |
| ENSG00000076706 | MCAM     | melanoma cell adhesion molecule [Source:HGNC Symbol;Acc:HGNC:6934]                             | 830   | 2.55 | 0.0799 | 31.9 | 9.9E-223 | 1.1E-220 |
| ENSG00000159200 | RCAN1    | regulator of calcineurin 1 [Source:HGNC Symbol;Acc:HGNC:3040]                                  | 1592  | 1.76 | 0.0549 | 32.0 | 3.3E-224 | 3.7E-222 |
| ENSG00000164543 | STK17A   | serine/threonine kinase 17a [Source:HGNC Symbol;Acc:HGNC:11395]                                | 974   | 2.21 | 0.0688 | 32.1 | 2.6E-226 | 2.9E-224 |
| ENSG00000181019 | NQO1     | NAD(P)H quinone dehydrogenase 1 [Source:HGNC Symbol;Acc:HGNC:2874]                             | 9500  | 1.06 | 0.0327 | 32.6 | 1.9E-232 | 2.2E-230 |
| ENSG00000161638 | ITGA5    | integrin subunit alpha 5 [Source:HGNC Symbol;Acc:HGNC:6141]                                    | 1365  | 2.17 | 0.0667 | 32.6 | 1.3E-232 | 1.5E-230 |
| ENSG00000145287 | PLAC8    | placenta associated 8 [Source:HGNC Symbol;Acc:HGNC:19254]                                      | 1595  | 1.78 | 0.0545 | 32.7 | 4.4E-234 | 5.1E-232 |
| ENSG00000128595 | CALU     | calumenin [Source:HGNC Symbol;Acc:HGNC:1458]                                                   | 11247 | 0.84 | 0.0257 | 32.7 | 3.8E-234 | 4.5E-232 |
| ENSG00000176463 | SLCO3A1  | solute carrier organic anion transporter family member 3A1 [Source:HGNC Symbol;Acc:HGNC:10952] | 576   | 4.13 | 0.1264 | 32.7 | 9.1E-235 | 1.1E-232 |
| ENSG00000185215 | TNFAIP2  | TNF alpha induced protein 2 [Source:HGNC Symbol;Acc:HGNC:11895]                                | 1991  | 1.56 | 0.0477 | 32.8 | 5.7E-236 | 6.9E-234 |
| ENSG00000177879 | AP3S1    | adaptor related protein complex 3 subunit sigma 1 [Source:HGNC Symbol;Acc:HGNC:2013]           | 2595  | 1.59 | 0.0485 | 32.8 | 5.5E-236 | 6.6E-234 |
| ENSG00000198682 | PAPSS2   | 3'-phosphoadenosine 5'-phosphosulfate synthase 2 [Source:HGNC Symbol;Acc:HGNC:8604]            | 2428  | 1.45 | 0.0440 | 32.9 | 8.5E-237 | 1.0E-234 |
| ENSG00000079819 | EPB41L2  | erythrocyte membrane protein band 4.1 like 2 [Source:HGNC Symbol;Acc:HGNC:3379]                | 738   | 2.74 | 0.0834 | 32.9 | 1.6E-237 | 2.0E-235 |
| ENSG00000174564 | IL20RB   | interleukin 20 receptor subunit beta [Source:HGNC Symbol;Acc:HGNC:6004]                        | 655   | 5.59 | 0.1692 | 33.0 | 7.0E-239 | 8.7E-237 |
| ENSG00000173852 | DPY19L1  | dpy-19 like C-mannosyltransferase 1 [Source:HGNC Symbol;Acc:HGNC:22205]                        | 1108  | 2.14 | 0.0648 | 33.1 | 3.7E-240 | 4.6E-238 |
| ENSG00000073712 | FERMT2   | fermitin family member 2 [Source:HGNC Symbol;Acc:HGNC:15767]                                   | 3294  | 1.26 | 0.0381 | 33.2 | 1.2E-241 | 1.5E-239 |

|                 |           |                                                                                                |       |      |        |      |          |          |
|-----------------|-----------|------------------------------------------------------------------------------------------------|-------|------|--------|------|----------|----------|
| ENSG00000213585 | VDAC1     | voltage dependent anion channel 1 [Source:HGNC Symbol;Acc:HGNC:12669]                          | 7580  | 1.00 | 0.0300 | 33.3 | 1.8E-242 | 2.2E-240 |
| ENSG00000168003 | SLC3A2    | solute carrier family 3 member 2 [Source:HGNC Symbol;Acc:HGNC:11026]                           | 12593 | 0.95 | 0.0284 | 33.4 | 6.8E-244 | 8.7E-242 |
| ENSG00000035403 | VCL       | vinculin [Source:HGNC Symbol;Acc:HGNC:12665]                                                   | 6214  | 1.06 | 0.0316 | 33.4 | 3.9E-245 | 5.0E-243 |
| ENSG00000115310 | RTN4      | reticulon 4 [Source:HGNC Symbol;Acc:HGNC:14085]                                                | 9067  | 1.09 | 0.0326 | 33.5 | 1.7E-245 | 2.3E-243 |
| ENSG00000103415 | HMOX2     | heme oxygenase 2 [Source:HGNC Symbol;Acc:HGNC:5014]                                            | 1559  | 1.81 | 0.0541 | 33.5 | 5.2E-246 | 6.9E-244 |
| ENSG00000034510 | TMSB10    | thymosin beta 10 [Source:HGNC Symbol;Acc:HGNC:11879]                                           | 23128 | 1.11 | 0.0330 | 33.5 | 1.1E-246 | 1.4E-244 |
| ENSG00000105939 | ZC3HAV1   | zinc finger CCCH-type containing, antiviral 1 [Source:HGNC Symbol;Acc:HGNC:23721]              | 2971  | 1.37 | 0.0409 | 33.5 | 9.7E-247 | 1.3E-244 |
| ENSG00000075275 | CELSR1    | cadherin EGF LAG seven-pass G-type receptor 1 [Source:HGNC Symbol;Acc:HGNC:1850]               | 2559  | 1.45 | 0.0431 | 33.6 | 8.8E-248 | 1.2E-245 |
| ENSG00000185745 | IFIT1     | interferon induced protein with tetratricopeptide repeats 1 [Source:HGNC Symbol;Acc:HGNC:5407] | 6531  | 1.41 | 0.0416 | 34.0 | 4.6E-253 | 6.3E-251 |
| ENSG00000136478 | TEX2      | testis expressed 2 [Source:HGNC Symbol;Acc:HGNC:30884]                                         | 3130  | 1.45 | 0.0423 | 34.1 | 1.7E-255 | 2.4E-253 |
| ENSG00000164078 | MST1R     | macrophage stimulating 1 receptor [Source:HGNC Symbol;Acc:HGNC:7381]                           | 1342  | 1.99 | 0.0583 | 34.2 | 2.0E-256 | 2.8E-254 |
| ENSG00000170271 | FAXDC2    | fatty acid hydroxylase domain containing 2 [Source:HGNC Symbol;Acc:HGNC:1334]                  | 767   | 5.92 | 0.1731 | 34.2 | 1.2E-256 | 1.7E-254 |
| ENSG00000171208 | NETO2     | neuropilin and tolloid like 2 [Source:HGNC Symbol;Acc:HGNC:14644]                              | 3126  | 1.34 | 0.0392 | 34.3 | 3.1E-257 | 4.5E-255 |
| ENSG00000163814 | CDCP1     | CUB domain containing protein 1 [Source:HGNC Symbol;Acc:HGNC:24357]                            | 5365  | 1.18 | 0.0345 | 34.4 | 6.5E-259 | 9.5E-257 |
| ENSG00000138685 | FGF2      | fibroblast growth factor 2 [Source:HGNC Symbol;Acc:HGNC:3676]                                  | 1226  | 2.18 | 0.0631 | 34.5 | 2.3E-260 | 3.4E-258 |
| ENSG00000115419 | GLS       | glutaminase [Source:HGNC Symbol;Acc:HGNC:4331]                                                 | 6124  | 1.11 | 0.0321 | 34.5 | 1.5E-261 | 2.2E-259 |
| ENSG00000143819 | EPHX1     | epoxide hydrolase 1 [Source:HGNC Symbol;Acc:HGNC:3401]                                         | 1706  | 1.83 | 0.0528 | 34.7 | 7.0E-264 | 1.0E-261 |
| ENSG00000107201 | DDX58     | DExD/H-box helicase 58 [Source:HGNC Symbol;Acc:HGNC:19102]                                     | 2732  | 1.56 | 0.0445 | 34.9 | 2.3E-267 | 3.4E-265 |
| ENSG00000100300 | TSPO      | translocator protein [Source:HGNC Symbol;Acc:HGNC:1158]                                        | 1379  | 2.08 | 0.0594 | 35.0 | 4.5E-269 | 7.0E-267 |
| ENSG00000198959 | TGM2      | transglutaminase 2 [Source:HGNC Symbol;Acc:HGNC:11778]                                         | 9008  | 1.00 | 0.0284 | 35.4 | 6.7E-274 | 1.1E-271 |
| ENSG00000129657 | SEC14L1   | SEC14 like lipid binding 1 [Source:HGNC Symbol;Acc:HGNC:10698]                                 | 3367  | 1.36 | 0.0384 | 35.5 | 1.5E-276 | 2.4E-274 |
| ENSG00000233276 | GPX1      | glutathione peroxidase 1 [Source:HGNC Symbol;Acc:HGNC:4553]                                    | 4225  | 1.44 | 0.0398 | 36.2 | 8.7E-287 | 1.5E-284 |
| ENSG00000166741 | NNMT      | nicotinamide N-methyltransferase [Source:HGNC Symbol;Acc:HGNC:7861]                            | 702   | 3.68 | 0.1017 | 36.2 | 1.4E-287 | 2.4E-285 |
| ENSG00000072110 | ACTN1     | actinin alpha 1 [Source:HGNC Symbol;Acc:HGNC:163]                                              | 11614 | 1.10 | 0.0299 | 37.0 | 1.6E-299 | 2.8E-297 |
| ENSG00000117143 | UAP1      | UDP-N-acetylglucosamine pyrophosphorylase 1 [Source:HGNC Symbol;Acc:HGNC:12457]                | 2646  | 1.56 | 0.0422 | 37.0 | 3.4E-300 | 6.1E-298 |
| ENSG00000076513 | ANKRD13A  | ankyrin repeat domain 13A [Source:HGNC Symbol;Acc:HGNC:21268]                                  | 1310  | 2.28 | 0.0611 | 37.3 | 4.2E-304 | 7.6E-302 |
| ENSG00000110880 | CORO1C    | coronin 1C [Source:HGNC Symbol;Acc:HGNC:2254]                                                  | 4612  | 1.30 | 0.0349 | 37.3 | 2.7E-304 | 5.0E-302 |
| ENSG00000103024 | NME3      | NME/NM23 nucleoside diphosphate kinase 3 [Source:HGNC Symbol;Acc:HGNC:7851]                    | 717   | 4.13 | 0.1104 | 37.4 | 1.7E-306 | 3.2E-304 |
| ENSG00000039560 | RAI14     | retinoic acid induced 14 [Source:HGNC Symbol;Acc:HGNC:14873]                                   | 931   | 3.01 | 0.0802 | 37.6 | 0        | 0        |
| ENSG00000111640 | GAPDH     | glyceraldehyde-3-phosphate dehydrogenase [Source:HGNC Symbol;Acc:HGNC:4141]                    | 79532 | 0.86 | 0.0227 | 37.8 | 0        | 0        |
| ENSG00000138347 | MYPN      | myopalladin [Source:HGNC Symbol;Acc:HGNC:23246]                                                | 1468  | 2.26 | 0.0598 | 37.8 | 0        | 0        |
| ENSG00000053747 | LAMA3     | laminin subunit alpha 3 [Source:HGNC Symbol;Acc:HGNC:6483]                                     | 6414  | 1.14 | 0.0301 | 38.0 | 0        | 0        |
| ENSG00000117394 | SLC2A1    | solute carrier family 2 member 1 [Source:HGNC Symbol;Acc:HGNC:11005]                           | 4793  | 1.28 | 0.0336 | 38.1 | 0        | 0        |
| ENSG00000145623 | OSMR      | oncostatin M receptor [Source:HGNC Symbol;Acc:HGNC:8507]                                       | 2841  | 1.61 | 0.0421 | 38.3 | 0        | 0        |
| ENSG00000177469 | CAVIN1    | caveolae associated protein 1 [Source:HGNC Symbol;Acc:HGNC:9688]                               | 21886 | 1.02 | 0.0267 | 38.3 | 0        | 0        |
| ENSG00000103202 | NME4      | NME/NM23 nucleoside diphosphate kinase 4 [Source:HGNC Symbol;Acc:HGNC:7852]                    | 4038  | 1.53 | 0.0396 | 38.6 | 0        | 0        |
| ENSG00000006327 | TNFRSF12A | TNF receptor superfamily member 12A [Source:HGNC Symbol;Acc:HGNC:18152]                        | 7955  | 1.16 | 0.0299 | 38.9 | 0        | 0        |
| ENSG00000182809 | CRIP2     | cysteine rich protein 2 [Source:HGNC Symbol;Acc:HGNC:2361]                                     | 3015  | 1.63 | 0.0415 | 39.2 | 0        | 0        |
| ENSG00000167460 | TPM4      | tropomyosin 4 [Source:HGNC Symbol;Acc:HGNC:12013]                                              | 14818 | 1.02 | 0.0260 | 39.3 | 0        | 0        |
| ENSG00000116016 | EPAS1     | endothelial PAS domain protein 1 [Source:HGNC Symbol;Acc:HGNC:3374]                            | 8280  | 1.17 | 0.0294 | 39.6 | 0        | 0        |
| ENSG00000166147 | FBN1      | fibrillin 1 [Source:HGNC Symbol;Acc:HGNC:3603]                                                 | 927   | 3.26 | 0.0823 | 39.6 | 0        | 0        |
| ENSG00000087086 | FTL       | ferritin light chain [Source:HGNC Symbol;Acc:HGNC:3999]                                        | 13374 | 1.03 | 0.0259 | 39.8 | 0        | 0        |

|                 |         |                                                                                                |       |      |        |      |   |   |
|-----------------|---------|------------------------------------------------------------------------------------------------|-------|------|--------|------|---|---|
| ENSG00000131668 | BARX1   | BARX homeobox 1 [Source:HGNC Symbol;Acc:HGNC:955]                                              | 959   | 3.14 | 0.0785 | 40.1 | 0 | 0 |
| ENSG00000134757 | DSG3    | desmoglein 3 [Source:HGNC Symbol;Acc:HGNC:3050]                                                | 1450  | 2.41 | 0.0597 | 40.3 | 0 | 0 |
| ENSG00000050405 | LIMA1   | LIM domain and actin binding 1 [Source:HGNC Symbol;Acc:HGNC:24636]                             | 8328  | 1.27 | 0.0314 | 40.4 | 0 | 0 |
| ENSG00000074800 | ENO1    | enolase 1 [Source:HGNC Symbol;Acc:HGNC:3350]                                                   | 66063 | 0.90 | 0.0222 | 40.4 | 0 | 0 |
| ENSG00000118985 | ELL2    | elongation factor for RNA polymerase II 2 [Source:HGNC Symbol;Acc:HGNC:17064]                  | 1834  | 2.27 | 0.0561 | 40.5 | 0 | 0 |
| ENSG00000271503 | CCL5    | C-C motif chemokine ligand 5 [Source:HGNC Symbol;Acc:HGNC:10632]                               | 1075  | 2.98 | 0.0726 | 41.1 | 0 | 0 |
| ENSG00000183853 | KIRREL1 | kirre like nephrin family adhesion molecule 1 [Source:HGNC Symbol;Acc:HGNC:15734]              | 1678  | 2.20 | 0.0533 | 41.3 | 0 | 0 |
| ENSG00000115756 | HPCAL1  | hippocalcin like 1 [Source:HGNC Symbol;Acc:HGNC:5145]                                          | 961   | 3.68 | 0.0871 | 42.2 | 0 | 0 |
| ENSG00000024422 | EHD2    | EH domain containing 2 [Source:HGNC Symbol;Acc:HGNC:3243]                                      | 8536  | 1.23 | 0.0288 | 42.6 | 0 | 0 |
| ENSG00000100342 | APOL1   | apolipoprotein L1 [Source:HGNC Symbol;Acc:HGNC:618]                                            | 2447  | 2.09 | 0.0488 | 42.8 | 0 | 0 |
| ENSG00000086289 | EPDR1   | ependymin related 1 [Source:HGNC Symbol;Acc:HGNC:17572]                                        | 1213  | 3.08 | 0.0715 | 43.1 | 0 | 0 |
| ENSG00000100097 | LGALS1  | galectin 1 [Source:HGNC Symbol;Acc:HGNC:6561]                                                  | 12614 | 5.02 | 0.1142 | 44.0 | 0 | 0 |
| ENSG00000154127 | UBASH3B | ubiquitin associated and SH3 domain containing B [Source:HGNC Symbol;Acc:HGNC:29884]           | 1125  | 3.46 | 0.0785 | 44.0 | 0 | 0 |
| ENSG00000131746 | TNS4    | tensin 4 [Source:HGNC Symbol;Acc:HGNC:24352]                                                   | 1164  | 3.35 | 0.0753 | 44.5 | 0 | 0 |
| ENSG00000145730 | PAM     | peptidylglycine alpha-amidating monooxygenase [Source:HGNC Symbol;Acc:HGNC:8596]               | 5640  | 1.45 | 0.0323 | 44.9 | 0 | 0 |
| ENSG00000103257 | SLC7A5  | solute carrier family 7 member 5 [Source:HGNC Symbol;Acc:HGNC:11063]                           | 20816 | 1.20 | 0.0266 | 45.0 | 0 | 0 |
| ENSG00000169439 | SDC2    | syndecan 2 [Source:HGNC Symbol;Acc:HGNC:10659]                                                 | 1079  | 4.77 | 0.1059 | 45.1 | 0 | 0 |
| ENSG00000134954 | ETS1    | ETS proto-oncogene 1, transcription factor [Source:HGNC Symbol;Acc:HGNC:3488]                  | 1672  | 2.63 | 0.0583 | 45.2 | 0 | 0 |
| ENSG00000085662 | AKR1B1  | aldo-keto reductase family 1 member B [Source:HGNC Symbol;Acc:HGNC:381]                        | 6258  | 1.49 | 0.0330 | 45.2 | 0 | 0 |
| ENSG00000118523 | CCN2    | cellular communication network factor 2 [Source:HGNC Symbol;Acc:HGNC:2500]                     | 1303  | 3.27 | 0.0720 | 45.4 | 0 | 0 |
| ENSG00000005884 | ITGA3   | integrin subunit alpha 3 [Source:HGNC Symbol;Acc:HGNC:6139]                                    | 12693 | 1.26 | 0.0276 | 45.7 | 0 | 0 |
| ENSG00000116260 | QSOX1   | quiescin sulphydryl oxidase 1 [Source:HGNC Symbol;Acc:HGNC:9756]                               | 9994  | 1.44 | 0.0310 | 46.5 | 0 | 0 |
| ENSG00000013364 | MVP     | major vault protein [Source:HGNC Symbol;Acc:HGNC:7531]                                         | 1225  | 4.14 | 0.0871 | 47.5 | 0 | 0 |
| ENSG00000178172 | SPINK6  | serine peptidase inhibitor Kazal type 6 [Source:HGNC Symbol;Acc:HGNC:29486]                    | 1909  | 2.95 | 0.0620 | 47.6 | 0 | 0 |
| ENSG00000141526 | SLC16A3 | solute carrier family 16 member 3 [Source:HGNC Symbol;Acc:HGNC:10924]                          | 4817  | 1.87 | 0.0391 | 47.9 | 0 | 0 |
| ENSG00000173227 | SYT12   | synaptotagmin 12 [Source:HGNC Symbol;Acc:HGNC:18381]                                           | 1401  | 5.46 | 0.1133 | 48.2 | 0 | 0 |
| ENSG00000186832 | KRT16   | keratin 16 [Source:HGNC Symbol;Acc:HGNC:6423]                                                  | 7418  | 1.68 | 0.0349 | 48.3 | 0 | 0 |
| ENSG00000166825 | ANPEP   | alanyl aminopeptidase, membrane [Source:HGNC Symbol;Acc:HGNC:500]                              | 1634  | 3.38 | 0.0680 | 49.7 | 0 | 0 |
| ENSG00000067057 | PFKP    | phosphofructokinase, platelet [Source:HGNC Symbol;Acc:HGNC:8878]                               | 5916  | 1.67 | 0.0335 | 49.9 | 0 | 0 |
| ENSG00000128510 | CPA4    | carboxypeptidase A4 [Source:HGNC Symbol;Acc:HGNC:15740]                                        | 2154  | 2.56 | 0.0506 | 50.5 | 0 | 0 |
| ENSG00000196923 | PDLIM7  | PDZ and LIM domain 7 [Source:HGNC Symbol;Acc:HGNC:22958]                                       | 3681  | 1.93 | 0.0382 | 50.6 | 0 | 0 |
| ENSG00000067225 | PKM     | pyruvate kinase M1/2 [Source:HGNC Symbol;Acc:HGNC:9021]                                        | 60197 | 1.17 | 0.0228 | 51.2 | 0 | 0 |
| ENSG00000119922 | IFIT2   | interferon induced protein with tetratricopeptide repeats 2 [Source:HGNC Symbol;Acc:HGNC:5409] | 5538  | 2.12 | 0.0409 | 51.7 | 0 | 0 |
| ENSG00000159335 | PTMS    | parathyrosin [Source:HGNC Symbol;Acc:HGNC:9629]                                                | 4546  | 1.93 | 0.0368 | 52.5 | 0 | 0 |
| ENSG00000167601 | AXL     | AXL receptor tyrosine kinase [Source:HGNC Symbol;Acc:HGNC:905]                                 | 2579  | 2.55 | 0.0483 | 52.9 | 0 | 0 |
| ENSG00000142227 | EMP3    | epithelial membrane protein 3 [Source:HGNC Symbol;Acc:HGNC:3335]                               | 1566  | 4.09 | 0.0766 | 53.4 | 0 | 0 |
| ENSG00000119917 | IFIT3   | interferon induced protein with tetratricopeptide repeats 3 [Source:HGNC Symbol;Acc:HGNC:5411] | 4875  | 2.24 | 0.0412 | 54.4 | 0 | 0 |
| ENSG00000116661 | FBXO2   | F-box protein 2 [Source:HGNC Symbol;Acc:HGNC:13581]                                            | 2834  | 2.48 | 0.0455 | 54.5 | 0 | 0 |
| ENSG00000102854 | MSLN    | mesothelin [Source:HGNC Symbol;Acc:HGNC:7371]                                                  | 1710  | 4.85 | 0.0874 | 55.5 | 0 | 0 |
| ENSG00000198467 | TPM2    | tropomyosin 2 [Source:HGNC Symbol;Acc:HGNC:12011]                                              | 10037 | 1.73 | 0.0310 | 56.0 | 0 | 0 |
| ENSG00000147689 | FAM83A  | family with sequence similarity 83 member A [Source:HGNC Symbol;Acc:HGNC:28210]                | 1773  | 4.43 | 0.0777 | 57.0 | 0 | 0 |
| ENSG00000145555 | MYO10   | myosin X [Source:HGNC Symbol;Acc:HGNC:7593]                                                    | 2027  | 3.93 | 0.0674 | 58.3 | 0 | 0 |

|                 |          |                                                                                      |       |      |        |       |   |   |
|-----------------|----------|--------------------------------------------------------------------------------------|-------|------|--------|-------|---|---|
| ENSG00000134013 | LOXL2    | lysyl oxidase like 2 [Source:HGNC Symbol;Acc:HGNC:6666]                              | 2070  | 5.44 | 0.0929 | 58.5  | 0 | 0 |
| ENSG00000184640 | SEPTIN9  | septin 9 [Source:HGNC Symbol;Acc:HGNC:7323]                                          | 8041  | 1.87 | 0.0320 | 58.6  | 0 | 0 |
| ENSG00000100234 | TIMP3    | TIMP metalloproteinase inhibitor 3 [Source:HGNC Symbol;Acc:HGNC:11822]               | 2521  | 3.10 | 0.0530 | 58.6  | 0 | 0 |
| ENSG00000152952 | PLOD2    | procollagen-lysine,2-oxoglutarate 5-dioxygenase 2 [Source:HGNC Symbol;Acc:HGNC:9082] | 5233  | 2.12 | 0.0360 | 58.8  | 0 | 0 |
| ENSG00000135114 | OASL     | 2'-5'-oligoadenylate synthetase like [Source:HGNC Symbol;Acc:HGNC:8090]              | 3404  | 2.79 | 0.0469 | 59.4  | 0 | 0 |
| ENSG00000142871 | CCN1     | cellular communication network factor 1 [Source:HGNC Symbol;Acc:HGNC:2654]           | 12246 | 1.64 | 0.0274 | 60.0  | 0 | 0 |
| ENSG00000041982 | TNC      | tenascin C [Source:HGNC Symbol;Acc:HGNC:5318]                                        | 6100  | 2.30 | 0.0346 | 66.5  | 0 | 0 |
| ENSG00000108679 | LGALS3BP | galectin 3 binding protein [Source:HGNC Symbol;Acc:HGNC:6564]                        | 9777  | 1.99 | 0.0295 | 67.4  | 0 | 0 |
| ENSG00000167754 | KLK5     | kallikrein related peptidase 5 [Source:HGNC Symbol;Acc:HGNC:6366]                    | 8328  | 2.48 | 0.0366 | 67.9  | 0 | 0 |
| ENSG00000143320 | CRABP2   | cellular retinoic acid binding protein 2 [Source:HGNC Symbol;Acc:HGNC:2339]          | 16112 | 2.05 | 0.0291 | 70.3  | 0 | 0 |
| ENSG00000113140 | SPARC    | secreted protein acidic and cysteine rich [Source:HGNC Symbol;Acc:HGNC:11219]        | 4212  | 3.05 | 0.0423 | 72.0  | 0 | 0 |
| ENSG00000103187 | COTL1    | coactosin like F-actin binding protein 1 [Source:HGNC Symbol;Acc:HGNC:18304]         | 5553  | 2.87 | 0.0362 | 79.4  | 0 | 0 |
| ENSG00000147065 | MSN      | moesin [Source:HGNC Symbol;Acc:HGNC:7373]                                            | 7801  | 3.01 | 0.0367 | 82.2  | 0 | 0 |
| ENSG00000062038 | CDH3     | cadherin 3 [Source:HGNC Symbol;Acc:HGNC:1762]                                        | 8642  | 3.03 | 0.0318 | 95.5  | 0 | 0 |
| ENSG00000026508 | CD44     | CD44 molecule (Indian blood group) [Source:HGNC Symbol;Acc:HGNC:1681]                | 7565  | 5.53 | 0.0532 | 103.9 | 0 | 0 |
| ENSG00000120708 | TGFB1    | transforming growth factor beta induced [Source:HGNC Symbol;Acc:HGNC:11771]          | 11775 | 3.76 | 0.0340 | 110.4 | 0 | 0 |



**Supplementary Table 4:** Shown are genes that are significantly differentially expressed between H1650-derived BrM and Tr-BrM cell lines by RNA-sequencing. Differential expression statistics from DESeq2 analysis are included for all significantly differentially expressed genes. See accompanying Supplementary Fig. 2g.

**Supplementary Table 5**

| Sample type         | Model                   | Conc.(pg/ml) | SEM (if applicable) | Sample number (n) |
|---------------------|-------------------------|--------------|---------------------|-------------------|
| Serum               | PC9-Tr-BrM              | n.d.         |                     | n=4               |
| Serum               | H1650-Tr-BrM            | n.d.         |                     | n=4               |
| Culture supernatant | PC9-Tr-BrM              | 15.9         | 1.5                 | n=3               |
| Culture supernatant | H1650-Tr-BrM            | 5.8          | 0.50                | n=3               |
| Culture supernatant | Pos control diluted1:50 | 35.6         | 1.1                 | n=3               |

| Sample type | Model        | pg/mg protein | SEM (if applicable) | Sample number (n) |
|-------------|--------------|---------------|---------------------|-------------------|
| Cell lysate | PC9-Tr-BrM   | 8963.1        | 653.3               | n=3               |
| Cell lysate | H1650-Tr-BrM | 2891.9        | 302.4               | n=3               |

n.d.= not detectable

**Supplementary Table 5:** Table showing S100A9 protein levels analyzed by ELISA in serum and culture supernatant from PC9- and H1650-Tr-BrM models. To generate a positive control, H1650-Tr-BrM-S100A9i cells were engineered to ectopically express S100A9 cDNA carrying the Ig-kappa chain-leader secretory sequence, and were used after 1:50 dilution. Mean concentration values with SEM are shown. See also the Methods section.

**Supplementary Table 6**

| <b>Case Number</b> | <b>De-identified number</b> | <b>First line treatment</b>               | <b>Second line treatment</b>       | <b>Third line treatment</b> | <b>Biopsy site</b>       |
|--------------------|-----------------------------|-------------------------------------------|------------------------------------|-----------------------------|--------------------------|
| 1                  | #2                          | Osimertinib                               |                                    |                             | Brain                    |
| 2                  | #3                          | Osimertinib                               |                                    |                             | Soft tissue (abdomen)    |
| 3                  | #4                          | Osimertinib                               |                                    |                             | Pleural fluid            |
| 4                  | #5                          | Osimertinib                               |                                    |                             | Pleural fluid            |
| 5                  | #6                          | Osimertinib                               | Carboplatin/pemetrexed             |                             | Soft tissue (paraspinal) |
| 6                  | #7                          | Osimertinib                               | Carboplatin/pemetrexed/bevecizumab |                             | Lung                     |
| 7                  | #8                          | Definitive chemoRT                        | Osimertinib                        |                             | Lung                     |
| 8                  | #9                          | Osimertinib                               | Carboplatin/etoposide              |                             | Lymph Node               |
| 9                  | #10                         | Osimertinib/ bevecizumab (clinical trial) | Pembrolizumab                      |                             | Lung                     |
| 10                 | #11                         | Gefitinib (adjuvant)                      | Osimertinib                        |                             | Lung                     |
| 11                 | #12                         | Erlotinib                                 | Osimertinib                        |                             | Lung                     |
| 12                 | #13                         | Erlotinib                                 | Osimertinib                        |                             | Lymph Node               |
| 13                 | #14                         | Erlotinib                                 | Osimertinib                        |                             | Lung                     |
| 14                 | #15                         | Erlotinib                                 | Osimertinib                        |                             | Lung                     |
| 15                 | #16                         | Erlotinib                                 | Osimertinib                        |                             | Pleural fluid            |
| 16                 | #17                         | Carboplatin/pemetrexed/bevecizumab        | Osimertinib                        |                             | Lymph Node               |
| 17                 | #18                         | Osimertinib                               |                                    |                             | Lung                     |
| 18                 | #19                         | Adjuvant cisplatin/pemetrexed             | Erlotinib                          | Osimertinib                 | Lung                     |
| 19                 | #20                         | Erlotinib                                 | Osimertinib                        |                             | Lavage                   |
| 20                 | #21                         | Adjuvant cisplatin/docetaxel/trastuzumab  | Osimertinib                        |                             | Brain                    |
| 21                 | #22                         | Osimertinib                               |                                    |                             | Lung                     |
| 22                 | #23                         | Osimertinib                               |                                    |                             | Lung                     |
| 23                 | #24                         | Osimertinib                               |                                    |                             | Liver                    |

**Supplementary Table 6**

|    |     |             |             |  |               |
|----|-----|-------------|-------------|--|---------------|
| 24 | #25 |             | Osimertinib |  | Lymph Node    |
| 25 | #26 | Osimertinib |             |  | Pleural fluid |
| 26 | #27 | Osimertinib |             |  | Lung          |
| 27 | #28 | Osimertinib |             |  | Pleural fluid |
| 28 | #29 | Osimertinib |             |  | Lung          |
| 29 | #30 | Osimertinib |             |  | Lung          |

**Supplementary Table 6:** De-identified list of human lung cancer patients (n = 29) with confirmed EGFR-mutation-positive tumors and osimertinib treatment information. See also Methods section.

**Supplementary Table 7**

| ensembl_gene_id | external_gene_name | description                                                                      | base Mean | log2 Fold Change | lfcSE | stat  | pvalue    | padj      | sig |
|-----------------|--------------------|----------------------------------------------------------------------------------|-----------|------------------|-------|-------|-----------|-----------|-----|
| ENSG00000163220 | S100A9             | S100 calcium binding protein A9 [Source:HGNC Symbol;Acc:HGNC:10499]              | 7754      | -4.49            | 0.057 | -79.1 | 0         | 0         | DN  |
| ENSG00000130600 | H19                | H19 imprinted maternally expressed transcript [Source:HGNC Symbol;Acc:HGNC:4713] | 3640      | -3.08            | 0.055 | -56.1 | 0         | 0         | DN  |
| ENSG00000108244 | KRT23              | keratin 23 [Source:HGNC Symbol;Acc:HGNC:6438]                                    | 1750      | -3.35            | 0.071 | -47.2 | 0         | 0         | DN  |
| ENSG00000185479 | KRT6B              | keratin 6B [Source:HGNC Symbol;Acc:HGNC:6444]                                    | 1615      | -3.03            | 0.070 | -43.4 | 0         | 0         | DN  |
| ENSG00000165092 | ALDH1A1            | aldehyde dehydrogenase 1 family member A1 [Source:HGNC Symbol;Acc:HGNC:402]      | 1219      | -3.32            | 0.082 | -40.7 | 0         | 0         | DN  |
| ENSG00000205420 | KRT6A              | keratin 6A [Source:HGNC Symbol;Acc:HGNC:6443]                                    | 889       | -2.62            | 0.091 | -28.7 | 9.16E-181 | 7.40E-178 | DN  |
| ENSG00000170477 | KRT4               | keratin 4 [Source:HGNC Symbol;Acc:HGNC:6441]                                     | 450       | -4.46            | 0.157 | -28.4 | 3.04E-177 | 2.33E-174 | DN  |
| ENSG00000128422 | KRT17              | keratin 17 [Source:HGNC Symbol;Acc:HGNC:6427]                                    | 407       | -3.61            | 0.137 | -26.3 | 2.21E-152 | 1.31E-149 | DN  |
| ENSG00000143546 | S100A8             | S100 calcium binding protein A8 [Source:HGNC Symbol;Acc:HGNC:10498]              | 331       | -4.98            | 0.207 | -24.1 | 2.53E-128 | 9.26E-126 | DN  |
| ENSG00000186081 | KRT5               | keratin 5 [Source:HGNC Symbol;Acc:HGNC:6442]                                     | 350       | -5.75            | 0.251 | -22.9 | 3.64E-116 | 1.16E-113 | DN  |
| ENSG00000095637 | SORBS1             | sorbin and SH3 domain containing 1 [Source:HGNC Symbol;Acc:HGNC:14565]           | 348       | -2.71            | 0.126 | -21.5 | 1.48E-102 | 3.93E-100 | DN  |
| ENSG00000204941 | PSG5               | pregnancy specific beta-1-glycoprotein 5 [Source:HGNC Symbol;Acc:HGNC:9522]      | 320       | -3.08            | 0.150 | -20.5 | 9.11E-94  | 2.22E-91  | DN  |
| ENSG00000173432 | SAA1               | serum amyloid A1 [Source:HGNC Symbol;Acc:HGNC:10513]                             | 214       | -3.46            | 0.179 | -19.3 | 1.31E-82  | 2.64E-80  | DN  |

**Supplementary Table 7**

|                 |        |                                                                                     |     |       |       |       |          |          |    |
|-----------------|--------|-------------------------------------------------------------------------------------|-----|-------|-------|-------|----------|----------|----|
| ENSG00000184956 | MUC6   | mucin 6, oligomeric mucus/gel-forming [Source:HGNC Symbol;Acc:HGNC:7517]            | 185 | -3.90 | 0.215 | -18.1 | 1.76E-73 | 3.04E-71 | DN |
| ENSG00000099998 | GGT5   | gamma-glutamyltransferase 5 [Source:HGNC Symbol;Acc:HGNC:4260]                      | 159 | -2.58 | 0.191 | -13.5 | 1.81E-41 | 1.07E-39 | DN |
| ENSG00000244122 | UGT1A7 | UDP glucuronosyltransferase family 1 member A7 [Source:HGNC Symbol;Acc:HGNC:12539]  | 93  | -3.02 | 0.249 | -12.1 | 5.95E-34 | 2.56E-32 | DN |
| ENSG00000197142 | ACSL5  | acyl-CoA synthetase long chain family member 5 [Source:HGNC Symbol;Acc:HGNC:16526]  | 60  | 2.67  | 0.292 | 9.2   | 5.35E-20 | 1.06E-18 | UP |
| ENSG00000073756 | PTGS2  | prostaglandin-endoperoxide synthase 2 [Source:HGNC Symbol;Acc:HGNC:9605]            | 75  | 3.09  | 0.279 | 11.1  | 2.07E-28 | 6.88E-27 | UP |
| ENSG00000185070 | FLRT2  | fibronectin leucine rich transmembrane protein 2 [Source:HGNC Symbol;Acc:HGNC:3761] | 95  | 2.93  | 0.254 | 11.5  | 9.23E-31 | 3.47E-29 | UP |
| ENSG00000142619 | PADI3  | peptidyl arginine deiminase 3 [Source:HGNC Symbol;Acc:HGNC:18337]                   | 102 | 2.88  | 0.238 | 12.1  | 1.10E-33 | 4.69E-32 | UP |
| ENSG00000206195 | DUXAP8 | double homeobox A pseudogene 8 [Source:HGNC Symbol;Acc:HGNC:32187]                  | 118 | 2.68  | 0.219 | 12.2  | 2.48E-34 | 1.09E-32 | UP |
| ENSG00000183128 | CALHM3 | calcium homeostasis modulator 3 [Source:HGNC Symbol;Acc:HGNC:23458]                 | 106 | 2.98  | 0.235 | 12.7  | 7.54E-37 | 3.79E-35 | UP |
| ENSG00000165626 | BEND7  | BEN domain containing 7 [Source:HGNC Symbol;Acc:HGNC:23514]                         | 104 | 2.99  | 0.235 | 12.7  | 3.33E-37 | 1.71E-35 | UP |
| ENSG00000060982 | BCAT1  | branched chain amino acid transaminase 1 [Source:HGNC Symbol;Acc:HGNC:976]          | 118 | 3.47  | 0.253 | 13.7  | 5.16E-43 | 3.20E-41 | UP |
| ENSG00000136167 | LCP1   | lymphocyte cytosolic protein 1 [Source:HGNC Symbol;Acc:HGNC:6528]                   | 112 | 3.72  | 0.260 | 14.3  | 2.01E-46 | 1.45E-44 | UP |



**Supplementary Table 7**

|                 |        |                                                                                   |     |      |           |      |           |           |    |
|-----------------|--------|-----------------------------------------------------------------------------------|-----|------|-----------|------|-----------|-----------|----|
| ENSG00000146555 | SDK1   | sidekick cell adhesion molecule 1<br>[Source:HGNC<br>Symbol;Acc:HGNC:19307]       | 169 | 3.33 | 0.20<br>2 | 16.5 | 3.08E-61  | 3.67E-59  | UP |
| ENSG00000139714 | MORN3  | MORN repeat containing 3<br>[Source:HGNC<br>Symbol;Acc:HGNC:29807]                | 193 | 3.35 | 0.18<br>7 | 17.9 | 2.00E-71  | 3.30E-69  | UP |
| ENSG00000107954 | NEURL1 | neuralized E3 ubiquitin protein ligase 1<br>[Source:HGNC<br>Symbol;Acc:HGNC:7761] | 682 | 2.57 | 0.10<br>3 | 24.9 | 2.11E-136 | 9.81E-134 | UP |
| ENSG00000130303 | BST2   | bone marrow stromal cell antigen 2<br>[Source:HGNC<br>Symbol;Acc:HGNC:1119]       | 424 | 3.80 | 0.14<br>3 | 26.6 | 1.44E-155 | 8.86E-153 | UP |
| ENSG00000115468 | EFHD1  | EF-hand domain family member D1<br>[Source:HGNC<br>Symbol;Acc:HGNC:29556]         | 985 | 2.54 | 0.08<br>3 | 30.5 | 6.35E-204 | 6.97E-201 | UP |

**Supplementary Table 7:** Shown are genes that are significantly differentially expressed between PC9-Tr-BrM-S100A9i and PC9-Tr-BrM-Lenti-Con identified by RNA-sequencing. Differential expression statistics from DESeq2 analysis are included for all significantly differentially expressed genes. See also accompanying Fig. 5 and Supplementary Fig. 4.

Supplementary Table 8

| ensembl_gene_id | external_gene   | description                                                                                         | baseMean | log2Fold | lfcSE | stat   | pvalue    | padj      |
|-----------------|-----------------|-----------------------------------------------------------------------------------------------------|----------|----------|-------|--------|-----------|-----------|
| ENSG00000147889 | CDKN2A          | cyclin dependent kinase inhibitor 2A [Source:HGNC Symbol;Acc:HGNC:1787]                             | 38       | -2.4     | 0.35  | -6.75  | 1.48E-11  | 4.07E-10  |
| ENSG00000135439 | AGAP2           | ArfGAP with GTPase domain, ankyrin repeat and PH domain 2 [Source:HGNC Symbol;Acc:HGNC:16921]       | 82       | -2.3     | 0.26  | -9.01  | 2.02E-19  | 1.13E-17  |
| ENSG00000152049 | KCNE4           | potassium voltage-gated channel subfamily E regulatory subunit 4 [Source:HGNC Symbol;Acc:HGNC:6244] | 30       | -2.2     | 0.38  | -5.73  | 9.79E-09  | 1.82E-07  |
| ENSG00000135094 | SDS             | serine dehydratase [Source:HGNC Symbol;Acc:HGNC:10691]                                              | 33       | -2.0     | 0.38  | -5.22  | 1.82E-07  | 2.73E-06  |
| ENSG00000163993 | S100P           | S100 calcium binding protein P [Source:HGNC Symbol;Acc:HGNC:10504]                                  | 60       | -2.0     | 0.28  | -7.02  | 2.25E-12  | 6.62E-11  |
| ENSG00000038945 | MSR1            | macrophage scavenger receptor 1 [Source:HGNC Symbol;Acc:HGNC:7376]                                  | 56       | -1.9     | 0.29  | -6.53  | 6.60E-11  | 1.65E-09  |
| ENSG00000173110 | HSPA6           | heat shock protein family A (Hsp70) member 6 [Source:HGNC Symbol;Acc:HGNC:5239]                     | 235      | -1.9     | 0.14  | -13.47 | 2.47E-41  | 4.92E-39  |
| ENSG00000162493 | PDPN            | podoplanin [Source:HGNC Symbol;Acc:HGNC:29602]                                                      | 69       | -1.9     | 0.27  | -7.05  | 1.82E-12  | 5.41E-11  |
| ENSG00000203747 | FCGR3A          | Fc fragment of IgG receptor IIIa [Source:HGNC Symbol;Acc:HGNC:3619]                                 | 68       | -1.9     | 0.25  | -7.30  | 2.91E-13  | 9.60E-12  |
| ENSG00000110195 | FOLR1           | folate receptor alpha [Source:HGNC Symbol;Acc:HGNC:3791]                                            | 81       | -1.7     | 0.22  | -7.93  | 2.12E-15  | 8.48E-14  |
| ENSG00000124212 | PTGIS           | prostaglandin I2 synthase [Source:HGNC Symbol;Acc:HGNC:9603]                                        | 48       | -1.7     | 0.29  | -5.86  | 4.51E-09  | 8.81E-08  |
| ENSG00000141579 | ZNF750          | zinc finger protein 750 [Source:HGNC Symbol;Acc:HGNC:25843]                                         | 90       | -1.7     | 0.21  | -8.10  | 5.39E-16  | 2.28E-14  |
| ENSG00000163220 | S100A9          | S100 calcium binding protein A9 [Source:HGNC Symbol;Acc:HGNC:10499]                                 | 4782     | -1.7     | 0.10  | -16.92 | 3.45E-64  | 1.98E-61  |
| ENSG00000073067 | CYP2W1          | cytochrome P450 family 2 subfamily W member 1 [Source:HGNC Symbol;Acc:HGNC:20243]                   | 148      | -1.6     | 0.16  | -9.96  | 2.20E-23  | 1.68E-21  |
| ENSG00000137648 | TMPRSS4         | transmembrane serine protease 4 [Source:HGNC Symbol;Acc:HGNC:11878]                                 | 240      | -1.6     | 0.13  | -12.56 | 3.48E-36  | 5.25E-34  |
| ENSG00000161911 | TREML1          | triggering receptor expressed on myeloid cells like 1 [Source:HGNC Symbol;Acc:HGNC:20434]           | 25       | -1.6     | 0.40  | -4.04  | 5.30E-05  | 4.88E-04  |
| ENSG00000121933 | TMIGD3          | transmembrane and immunoglobulin domain containing 3 [Source:HGNC Symbol;Acc:HGNC:51375]            | 25       | -1.6     | 0.40  | -3.98  | 6.94E-05  | 6.20E-04  |
| ENSG00000130595 | TNNT3           | troponin T3, fast skeletal type [Source:HGNC Symbol;Acc:HGNC:11950]                                 | 47       | -1.6     | 0.29  | -5.37  | 7.93E-08  | 1.27E-06  |
| ENSG00000186204 | CYP4F12         | cytochrome P450 family 4 subfamily F member 12 [Source:HGNC Symbol;Acc:HGNC:18857]                  | 169      | -1.5     | 0.16  | -9.33  | 1.08E-20  | 6.67E-19  |
| ENSG00000211891 | IGHE            | immunoglobulin heavy constant epsilon [Source:HGNC Symbol;Acc:HGNC:5522]                            | 35       | -1.5     | 0.34  | -4.40  | 1.06E-05  | 1.14E-04  |
| ENSG00000279141 | LINC01451       | long intergenic non-protein coding RNA 1451 [Source:NCBI gene (formerly Entrezgene);Acc:401561]     | 39       | -1.5     | 0.31  | -4.80  | 1.57E-06  | 2.00E-05  |
| ENSG00000102886 | GDPD3           | glycerophosphodiester phosphodiesterase domain containing 3 [Source:HGNC Symbol;Acc:HGNC:28638]     | 51       | -1.5     | 0.27  | -5.52  | 3.43E-08  | 5.78E-07  |
| ENSG00000150625 | GPM6A           | glycoprotein M6A [Source:HGNC Symbol;Acc:HGNC:4460]                                                 | 62       | -1.5     | 0.27  | -5.58  | 2.38E-08  | 4.15E-07  |
| ENSG00000176887 | SOX11           | SRY-box transcription factor 11 [Source:HGNC Symbol;Acc:HGNC:11191]                                 | 48       | -1.4     | 0.31  | -4.58  | 4.69E-06  | 5.43E-05  |
| ENSG00000225783 | MIAT            | myocardial infarction associated transcript [Source:HGNC Symbol;Acc:HGNC:33425]                     | 37       | -1.4     | 0.32  | -4.39  | 1.16E-05  | 1.23E-04  |
| ENSG00000129538 | RNASE1          | ribonuclease A family member 1, pancreatic [Source:HGNC Symbol;Acc:HGNC:10044]                      | 246      | -1.4     | 0.24  | -5.59  | 2.26E-08  | 3.96E-07  |
| ENSG00000143546 | S100A8          | S100 calcium binding protein A8 [Source:HGNC Symbol;Acc:HGNC:10498]                                 | 1854     | -1.4     | 0.06  | -21.85 | 8.65E-106 | 1.55E-102 |
| ENSG00000170482 | SLC23A1         | solute carrier family 23 member 1 [Source:HGNC Symbol;Acc:HGNC:10974]                               | 27       | -1.4     | 0.37  | -3.65  | 2.66E-04  | 0.0020176 |
| ENSG00000115461 | IGFBP5          | insulin like growth factor binding protein 5 [Source:HGNC Symbol;Acc:HGNC:5474]                     | 480      | -1.3     | 0.26  | -5.18  | 2.26E-07  | 3.35E-06  |
| ENSG00000205847 | OR7E91P         | olfactory receptor family 7 subfamily E member 91 pseudogene [Source:HGNC Symbol;Acc:HGNC:14747]    | 31       | -1.3     | 0.35  | -3.73  | 1.90E-04  | 0.0014983 |
| ENSG00000186710 | CFAP73          | cilia and flagella associated protein 73 [Source:HGNC Symbol;Acc:HGNC:37100]                        | 27       | -1.3     | 0.39  | -3.32  | 8.94E-04  | 0.0057705 |
| ENSG00000149294 | NCAM1           | neural cell adhesion molecule 1 [Source:HGNC Symbol;Acc:HGNC:7656]                                  | 63       | -1.3     | 0.26  | -4.92  | 8.52E-07  | 1.14E-05  |
| ENSG00000166927 | MS4A7           | membrane spanning 4-domains A7 [Source:HGNC Symbol;Acc:HGNC:13378]                                  | 31       | -1.3     | 0.35  | -3.63  | 2.80E-04  | 0.002103  |
| ENSG00000088340 | FER1L4          | fer-1 like family member 4 (pseudogene) [Source:HGNC Symbol;Acc:HGNC:15801]                         | 205      | -1.3     | 0.13  | -9.50  | 2.01E-21  | 1.31E-19  |
| ENSG00000105519 | CAPS            | calcyphosine [Source:HGNC Symbol;Acc:HGNC:1487]                                                     | 183      | -1.3     | 0.14  | -8.82  | 1.18E-18  | 6.28E-17  |
| ENSG00000225886 | ENSG00000225886 | novel transcript, antisense to IFI6                                                                 | 48       | -1.3     | 0.28  | -4.56  | 5.14E-06  | 5.92E-05  |
| ENSG00000198515 | CNGA1           | cyclic nucleotide gated channel subunit alpha 1 [Source:HGNC Symbol;Acc:HGNC:2148]                  | 66       | -1.3     | 0.24  | -5.33  | 9.87E-08  | 1.56E-06  |
| ENSG00000111319 | SCNN1A          | sodium channel epithelial 1 subunit alpha [Source:HGNC Symbol;Acc:HGNC:10599]                       | 53       | -1.3     | 0.28  | -4.49  | 6.98E-06  | 7.87E-05  |
| ENSG00000155269 | GPR78           | G protein-coupled receptor 78 [Source:HGNC Symbol;Acc:HGNC:4528]                                    | 38       | -1.3     | 0.31  | -4.02  | 5.88E-05  | 5.36E-04  |
| ENSG00000164047 | CAMP            | cathelicidin antimicrobial peptide [Source:HGNC Symbol;Acc:HGNC:1472]                               | 30       | -1.2     | 0.35  | -3.58  | 3.48E-04  | 0.0025424 |
| ENSG00000160801 | PTH1R           | parathyroid hormone 1 receptor [Source:HGNC Symbol;Acc:HGNC:9608]                                   | 36       | -1.2     | 0.32  | -3.86  | 1.13E-04  | 9.54E-04  |

|                 |                 |                                                                                      |      |      |      |        |           |           |
|-----------------|-----------------|--------------------------------------------------------------------------------------|------|------|------|--------|-----------|-----------|
| ENSG00000130208 | APOC1           | apolipoprotein C1 [Source:HGNC Symbol;Acc:HGNC:607]                                  | 40   | -1.2 | 0.32 | -3.73  | 1.88E-04  | 0.0014859 |
| ENSG00000178445 | GLDC            | glycine decarboxylase [Source:HGNC Symbol;Acc:HGNC:4313]                             | 491  | -1.2 | 0.09 | -12.97 | 1.82E-38  | 3.15E-36  |
| ENSG00000171446 | KRT27           | keratin 27 [Source:HGNC Symbol;Acc:HGNC:30841]                                       | 37   | -1.2 | 0.31 | -3.80  | 1.45E-04  | 0.001183  |
| ENSG00000181449 | SOX2            | SRY-box transcription factor 2 [Source:HGNC Symbol;Acc:HGNC:11195]                   | 226  | -1.2 | 0.13 | -9.18  | 4.32E-20  | 2.57E-18  |
| ENSG00000233901 | LINC01503       | long intergenic non-protein coding RNA 1503 [Source:HGNC Symbol;Acc:HGNC:51184]      | 26   | -1.2 | 0.37 | -3.15  | 0.0016492 | 0.0097124 |
| ENSG0000014257  | ACP3            | acid phosphatase 3 [Source:HGNC Symbol;Acc:HGNC:125]                                 | 94   | -1.2 | 0.21 | -5.50  | 3.74E-08  | 6.27E-07  |
| ENSG00000171401 | KRT13           | keratin 13 [Source:HGNC Symbol;Acc:HGNC:6415]                                        | 148  | -1.1 | 0.16 | -7.20  | 5.87E-13  | 1.84E-11  |
| ENSG00000158869 | FCER1G          | Fc fragment of IgE receptor Ig [Source:HGNC Symbol;Acc:HGNC:3611]                    | 87   | -1.1 | 0.21 | -5.29  | 1.22E-07  | 1.90E-06  |
| ENSG00000118785 | SPP1            | secreted phosphoprotein 1 [Source:HGNC Symbol;Acc:HGNC:11255]                        | 974  | -1.1 | 0.21 | -5.29  | 1.25E-07  | 1.94E-06  |
| ENSG00000137968 | SLC44A5         | solute carrier family 44 member 5 [Source:HGNC Symbol;Acc:HGNC:28524]                | 90   | -1.1 | 0.21 | -5.24  | 1.65E-07  | 2.50E-06  |
| ENSG00000137959 | IFI44L          | interferon induced protein 44 like [Source:HGNC Symbol;Acc:HGNC:17817]               | 590  | -1.1 | 0.09 | -12.73 | 4.00E-37  | 6.38E-35  |
| ENSG00000103569 | AQP9            | aquaporin 9 [Source:HGNC Symbol;Acc:HGNC:643]                                        | 25   | -1.1 | 0.38 | -2.89  | 0.0038495 | 0.0196737 |
| ENSG00000140795 | MYLK3           | myosin light chain kinase 3 [Source:HGNC Symbol;Acc:HGNC:29826]                      | 69   | -1.1 | 0.23 | -4.89  | 9.85E-07  | 1.30E-05  |
| ENSG00000164434 | FABP7           | fatty acid binding protein 7 [Source:HGNC Symbol;Acc:HGNC:3562]                      | 33   | -1.1 | 0.35 | -3.11  | 0.0018718 | 0.0108178 |
| ENSG00000171388 | APLN            | apelin [Source:HGNC Symbol;Acc:HGNC:16665]                                           | 25   | -1.1 | 0.39 | -2.82  | 0.0048775 | 0.0239332 |
| ENSG00000067048 | DDX3Y           | DEAD-box helicase 3 Y-linked [Source:HGNC Symbol;Acc:HGNC:2699]                      | 25   | -1.1 | 0.39 | -2.76  | 0.0058627 | 0.0277753 |
| ENSG00000115596 | WNT6            | Wnt family member 6 [Source:HGNC Symbol;Acc:HGNC:12785]                              | 1131 | -1.1 | 0.08 | -13.26 | 4.21E-40  | 7.90E-38  |
| ENSG00000205890 | ENSG00000205890 | novel transcript, antisense to CCDC64B                                               | 36   | -1.1 | 0.31 | -3.43  | 6.09E-04  | 0.0041583 |
| ENSG00000160307 | S100B           | S100 calcium binding protein B [Source:HGNC Symbol;Acc:HGNC:10500]                   | 101  | -1.1 | 0.21 | -4.97  | 6.70E-07  | 9.10E-06  |
| ENSG00000167741 | GGT6            | gamma-glutamyltransferase 6 [Source:HGNC Symbol;Acc:HGNC:26891]                      | 332  | -1.1 | 0.11 | -9.89  | 4.69E-23  | 3.44E-21  |
| ENSG00000163141 | BNIP1           | BCL2 interacting protein like [Source:HGNC Symbol;Acc:HGNC:16976]                    | 175  | -1.1 | 0.15 | -7.21  | 5.50E-13  | 1.74E-11  |
| ENSG00000167183 | PRR15L          | proline rich 15 like [Source:HGNC Symbol;Acc:HGNC:28149]                             | 99   | -1.0 | 0.19 | -5.55  | 2.87E-08  | 4.92E-07  |
| ENSG00000105289 | TJP3            | tight junction protein 3 [Source:HGNC Symbol;Acc:HGNC:11829]                         | 251  | -1.0 | 0.13 | -8.31  | 9.54E-17  | 4.35E-15  |
| ENSG00000005108 | THSD7A          | thrombospondin type 1 domain containing 7A [Source:HGNC Symbol;Acc:HGNC:22207]       | 139  | -1.0 | 0.16 | -6.33  | 2.43E-10  | 5.65E-09  |
| ENSG00000182179 | UBA7            | ubiquitin like modifier activating enzyme 7 [Source:HGNC Symbol;Acc:HGNC:12471]      | 192  | -1.0 | 0.14 | -7.45  | 9.67E-14  | 3.29E-12  |
| ENSG00000176920 | FUT2            | fucosyltransferase 2 [Source:HGNC Symbol;Acc:HGNC:4013]                              | 28   | -1.0 | 0.35 | -2.90  | 0.0037646 | 0.0193072 |
| ENSG00000156127 | BATF            | basic leucine zipper ATF-like transcription factor [Source:HGNC Symbol;Acc:HGNC:958] | 53   | -1.0 | 0.26 | -3.80  | 1.45E-04  | 0.0011827 |
| ENSG00000107731 | UNC5B           | unc-5 netrin receptor B [Source:HGNC Symbol;Acc:HGNC:12568]                          | 196  | -1.0 | 0.15 | -6.54  | 6.33E-11  | 1.59E-09  |
| ENSG00000131095 | GFAP            | glial fibrillary acidic protein [Source:HGNC Symbol;Acc:HGNC:4235]                   | 1126 | -1.0 | 0.25 | -4.03  | 5.51E-05  | 5.05E-04  |
| ENSG00000103056 | SMPD3           | sphingomyelin phosphodiesterase 3 [Source:HGNC Symbol;Acc:HGNC:14240]                | 182  | -1.0 | 0.14 | -6.84  | 7.82E-12  | 2.22E-10  |
| ENSG00000001617 | SEMA3F          | semaphorin 3F [Source:HGNC Symbol;Acc:HGNC:10728]                                    | 594  | -1.0 | 0.08 | -11.95 | 6.78E-33  | 8.89E-31  |
| ENSG00000204021 | LIPK            | lipase family member K [Source:HGNC Symbol;Acc:HGNC:23444]                           | 218  | -1.0 | 0.13 | -7.58  | 3.58E-14  | 1.26E-12  |
| ENSG00000230091 | TMEM254-AS1     | TMEM254 antisense RNA 1 [Source:HGNC Symbol;Acc:HGNC:27340]                          | 148  | -1.0 | 0.16 | -6.25  | 4.20E-10  | 9.48E-09  |
| ENSG00000129991 | TNNI3           | troponin I3, cardiac type [Source:HGNC Symbol;Acc:HGNC:11947]                        | 34   | -1.0 | 0.33 | -3.02  | 0.0025067 | 0.0138709 |
| ENSG00000136002 | ARHGEF4         | Rho guanine nucleotide exchange factor 4 [Source:HGNC Symbol;Acc:HGNC:684]           | 170  | -1.0 | 0.14 | -6.79  | 1.09E-11  | 3.02E-10  |
| ENSG00000106278 | PTPRZ1          | protein tyrosine phosphatase receptor type Z1 [Source:HGNC Symbol;Acc:HGNC:9685]     | 181  | -1.0 | 0.33 | -2.95  | 0.0031848 | 0.0169147 |
| ENSG00000171051 | FPR1            | formyl peptide receptor 1 [Source:HGNC Symbol;Acc:HGNC:3826]                         | 30   | -1.0 | 0.36 | -2.64  | 0.0082884 | 0.0369369 |
| ENSG00000110079 | MS4A4A          | membrane spanning 4-domains A4A [Source:HGNC Symbol;Acc:HGNC:13371]                  | 28   | -1.0 | 0.37 | -2.62  | 0.0087899 | 0.0389138 |
| ENSG00000171476 | HOPX            | HOP homeobox [Source:HGNC Symbol;Acc:HGNC:24961]                                     | 67   | -1.0 | 0.23 | -4.17  | 3.00E-05  | 2.93E-04  |
| ENSG00000245526 | LINC00461       | long intergenic non-protein coding RNA 461 [Source:HGNC Symbol;Acc:HGNC:42810]       | 37   | -1.0 | 0.32 | -3.02  | 0.0025399 | 0.0140113 |
| ENSG00000179314 | WSCD1           | WSC domain containing 1 [Source:HGNC Symbol;Acc:HGNC:29060]                          | 35   | -1.0 | 0.32 | -2.94  | 0.0033015 | 0.0173966 |
| ENSG00000168961 | LGALS9          | galectin 9 [Source:HGNC Symbol;Acc:HGNC:6570]                                        | 68   | -0.9 | 0.24 | -4.03  | 5.52E-05  | 5.06E-04  |

|                 |                 |                                                                                                         |      |      |      |        |           |           |
|-----------------|-----------------|---------------------------------------------------------------------------------------------------------|------|------|------|--------|-----------|-----------|
| ENSG00000253552 | HOXA-AS2        | HOXA cluster antisense RNA 2 [Source:HGNC Symbol;Acc:HGNC:43745]                                        | 27   | -0.9 | 0.36 | -2.65  | 0.00798   | 0.0358298 |
| ENSG00000166863 | TAC3            | tachykinin precursor 3 [Source:HGNC Symbol;Acc:HGNC:11521]                                              | 33   | -0.9 | 0.33 | -2.90  | 0.0036808 | 0.0189736 |
| ENSG00000167525 | PROCA1          | protein interacting with cyclin A1 [Source:HGNC Symbol;Acc:HGNC:28600]                                  | 54   | -0.9 | 0.25 | -3.73  | 1.92E-04  | 0.0015113 |
| ENSG00000165140 | FBP1            | fructose-bisphosphatase 1 [Source:HGNC Symbol;Acc:HGNC:3606]                                            | 27   | -0.9 | 0.36 | -2.61  | 0.0091584 | 0.0401263 |
| ENSG00000143119 | CD53            | CD53 molecule [Source:HGNC Symbol;Acc:HGNC:1686]                                                        | 102  | -0.9 | 0.19 | -4.89  | 1.02E-06  | 1.35E-05  |
| ENSG00000169403 | PTAFR           | platelet activating factor receptor [Source:HGNC Symbol;Acc:HGNC:9582]                                  | 93   | -0.9 | 0.21 | -4.46  | 8.17E-06  | 9.07E-05  |
| ENSG00000137752 | CASP1           | caspase 1 [Source:HGNC Symbol;Acc:HGNC:1499]                                                            | 80   | -0.9 | 0.21 | -4.34  | 1.43E-05  | 1.50E-04  |
| ENSG00000000971 | CFH             | complement factor H [Source:HGNC Symbol;Acc:HGNC:4883]                                                  | 141  | -0.9 | 0.16 | -5.86  | 4.53E-09  | 8.83E-08  |
| ENSG00000121742 | GJB6            | gap junction protein beta 6 [Source:HGNC Symbol;Acc:HGNC:4288]                                          | 236  | -0.9 | 0.13 | -7.09  | 1.34E-12  | 4.01E-11  |
| ENSG00000133110 | POSTN           | periostin [Source:HGNC Symbol;Acc:HGNC:16953]                                                           | 164  | -0.9 | 0.15 | -5.99  | 2.04E-09  | 4.20E-08  |
| ENSG00000175147 | TMEM51-AS1      | TMEM51 antisense RNA 1 [Source:HGNC Symbol;Acc:HGNC:26301]                                              | 29   | -0.9 | 0.34 | -2.70  | 0.0069305 | 0.0318362 |
| ENSG00000132274 | TRIM22          | tripartite motif containing 22 [Source:HGNC Symbol;Acc:HGNC:16379]                                      | 505  | -0.9 | 0.09 | -10.27 | 9.47E-25  | 7.67E-23  |
| ENSG00000235295 | LINC01634       | long intergenic non-protein coding RNA 1634 [Source:HGNC Symbol;Acc:HGNC:52421]                         | 33   | -0.9 | 0.33 | -2.79  | 0.0052844 | 0.0255178 |
| ENSG00000149131 | SERPING1        | serpin family G member 1 [Source:HGNC Symbol;Acc:HGNC:1228]                                             | 126  | -0.9 | 0.18 | -5.14  | 2.68E-07  | 3.90E-06  |
| ENSG00000108465 | CDK5RAP3        | CDK5 regulatory subunit associated protein 3 [Source:HGNC Symbol;Acc:HGNC:18673]                        | 101  | -0.9 | 0.20 | -4.46  | 8.34E-06  | 9.23E-05  |
| ENSG00000099994 | SUSD2           | sushi domain containing 2 [Source:HGNC Symbol;Acc:HGNC:30667]                                           | 56   | -0.9 | 0.25 | -3.57  | 3.51E-04  | 0.0025638 |
| ENSG00000070915 | SLC12A3         | solute carrier family 12 member 3 [Source:HGNC Symbol;Acc:HGNC:10912]                                   | 34   | -0.9 | 0.32 | -2.82  | 0.0048495 | 0.0238173 |
| ENSG00000224984 | ENSG00000224984 | novel transcript                                                                                        | 59   | -0.9 | 0.25 | -3.63  | 2.82E-04  | 0.0021153 |
| ENSG00000170899 | GSTA4           | glutathione S-transferase alpha 4 [Source:HGNC Symbol;Acc:HGNC:4629]                                    | 31   | -0.9 | 0.34 | -2.62  | 0.0087722 | 0.0388494 |
| ENSG00000068078 | FGFR3           | fibroblast growth factor receptor 3 [Source:HGNC Symbol;Acc:HGNC:3690]                                  | 456  | -0.9 | 0.09 | -9.76  | 1.69E-22  | 1.20E-20  |
| ENSG00000082074 | FYB1            | FYN binding protein 1 [Source:HGNC Symbol;Acc:HGNC:4036]                                                | 46   | -0.9 | 0.30 | -2.96  | 0.0031189 | 0.0166029 |
| ENSG00000069812 | HES2            | hes family bHLH transcription factor 2 [Source:HGNC Symbol;Acc:HGNC:16005]                              | 760  | -0.9 | 0.07 | -11.88 | 1.49E-32  | 1.90E-30  |
| ENSG00000170006 | TMEM154         | transmembrane protein 154 [Source:HGNC Symbol;Acc:HGNC:26489]                                           | 309  | -0.9 | 0.11 | -7.57  | 3.73E-14  | 1.31E-12  |
| ENSG00000108830 | RND2            | Rho family GTPase 2 [Source:HGNC Symbol;Acc:HGNC:18315]                                                 | 60   | -0.9 | 0.25 | -3.52  | 4.33E-04  | 0.0030834 |
| ENSG00000139737 | SLAIN1          | SLAIN motif family member 1 [Source:HGNC Symbol;Acc:HGNC:26387]                                         | 44   | -0.9 | 0.29 | -2.96  | 0.0030784 | 0.0164305 |
| ENSG00000005961 | ITGA2B          | integrin subunit alpha 2b [Source:HGNC Symbol;Acc:HGNC:6138]                                            | 37   | -0.9 | 0.31 | -2.78  | 0.0053548 | 0.0257656 |
| ENSG00000163218 | PGLYRP4         | peptidoglycan recognition protein 4 [Source:HGNC Symbol;Acc:HGNC:30015]                                 | 89   | -0.9 | 0.21 | -4.18  | 2.96E-05  | 2.90E-04  |
| ENSG00000128284 | APOL3           | apolipoprotein L3 [Source:HGNC Symbol;Acc:HGNC:14868]                                                   | 50   | -0.9 | 0.27 | -3.16  | 0.0015607 | 0.0092624 |
| ENSG00000178075 | GRAMD1C         | GRAM domain containing 1C [Source:HGNC Symbol;Acc:HGNC:25252]                                           | 68   | -0.8 | 0.23 | -3.66  | 2.51E-04  | 0.00192   |
| ENSG00000169550 | MUC15           | mucin 15, cell surface associated [Source:HGNC Symbol;Acc:HGNC:14956]                                   | 1057 | -0.8 | 0.06 | -13.64 | 2.30E-42  | 5.14E-40  |
| ENSG00000215788 | TNFRSF25        | TNF receptor superfamily member 25 [Source:HGNC Symbol;Acc:HGNC:11910]                                  | 178  | -0.8 | 0.14 | -6.03  | 1.67E-09  | 3.46E-08  |
| ENSG00000176046 | NUPR1           | nuclear protein 1, transcriptional regulator [Source:HGNC Symbol;Acc:HGNC:29990]                        | 175  | -0.8 | 0.17 | -4.98  | 6.45E-07  | 8.78E-06  |
| ENSG00000128268 | MGAT3           | beta-1,4-mannosyl-glycoprotein 4-beta-N-acetylglucosaminyltransferase [Source:HGNC Symbol;Acc:HGNC:968] | 968  | -0.8 | 0.07 | -12.48 | 1.00E-35  | 1.46E-33  |
| ENSG00000133710 | SPINK5          | serine peptidase inhibitor Kazal type 5 [Source:HGNC Symbol;Acc:HGNC:15464]                             | 42   | -0.8 | 0.29 | -2.85  | 0.0043673 | 0.0218975 |
| ENSG00000258314 | ENSG00000258314 | novel transcript                                                                                        | 36   | -0.8 | 0.31 | -2.65  | 0.0081683 | 0.0365126 |
| ENSG00000197632 | SERPINB2        | serpin family B member 2 [Source:HGNC Symbol;Acc:HGNC:8584]                                             | 47   | -0.8 | 0.28 | -2.97  | 0.0029789 | 0.0160002 |
| ENSG00000189120 | SP6             | Sp6 transcription factor [Source:HGNC Symbol;Acc:HGNC:14530]                                            | 1082 | -0.8 | 0.06 | -12.78 | 2.17E-37  | 3.68E-35  |
| ENSG00000132394 | EEFSEC          | eukaryotic elongation factor, selenocysteine-tRNA specific [Source:HGNC Symbol;Acc:HGNC:24614]          | 51   | -0.8 | 0.26 | -3.17  | 0.0015332 | 0.0091226 |
| ENSG00000260430 | ENSG00000260430 | novel transcript                                                                                        | 38   | -0.8 | 0.31 | -2.64  | 0.0083254 | 0.037071  |
| ENSG00000259953 | ENSG00000259953 | novel transcript, overlapping SUSD1                                                                     | 73   | -0.8 | 0.23 | -3.62  | 2.91E-04  | 0.0021732 |
| ENSG00000185432 | METTL7A         | methyltransferase like 7A [Source:HGNC Symbol;Acc:HGNC:24550]                                           | 701  | -0.8 | 0.08 | -10.78 | 4.06E-27  | 3.99E-25  |
| ENSG00000254536 | ENSG00000254536 | novel protein                                                                                           | 40   | -0.8 | 0.30 | -2.73  | 0.0063761 | 0.0297816 |

|                 |                 |                                                                                               |      |      |      |        |           |           |
|-----------------|-----------------|-----------------------------------------------------------------------------------------------|------|------|------|--------|-----------|-----------|
| ENSG00000162069 | BICDL2          | BICD family like cargo adaptor 2 [Source:HGNC Symbol;Acc:HGNC:33584]                          | 225  | -0.8 | 0.13 | -6.14  | 8.36E-10  | 1.81E-08  |
| ENSG00000260912 | ENSG00000260912 | novel transcript, overlapping ACER2                                                           | 58   | -0.8 | 0.24 | -3.37  | 7.49E-04  | 0.0049586 |
| ENSG00000150471 | ADGRL3          | adhesion G protein-coupled receptor L3 [Source:HGNC Symbol;Acc:HGNC:20974]                    | 48   | -0.8 | 0.29 | -2.83  | 0.0047065 | 0.0232657 |
| ENSG00000110076 | NRXN2           | neurexin 2 [Source:HGNC Symbol;Acc:HGNC:8009]                                                 | 209  | -0.8 | 0.14 | -5.94  | 2.87E-09  | 5.76E-08  |
| ENSG00000124466 | LYPD3           | LY6/PLAUR domain containing 3 [Source:HGNC Symbol;Acc:HGNC:24880]                             | 6313 | -0.8 | 0.04 | -18.53 | 1.15E-76  | 8.79E-74  |
| ENSG00000255571 | MIR9-3HG        | MIR9-3 host gene [Source:HGNC Symbol;Acc:HGNC:27388]                                          | 121  | -0.8 | 0.17 | -4.61  | 3.97E-06  | 4.68E-05  |
| ENSG00000155761 | SPAG17          | sperm associated antigen 17 [Source:HGNC Symbol;Acc:HGNC:26620]                               | 59   | -0.8 | 0.24 | -3.35  | 8.12E-04  | 0.005319  |
| ENSG00000111052 | LIN7A           | lin-7 homolog A, crumbs cell polarity complex component [Source:HGNC Symbol;Acc:HGNC:17787]   | 101  | -0.8 | 0.19 | -4.18  | 2.98E-05  | 2.91E-04  |
| ENSG00000134222 | PSRC1           | proline and serine rich coiled-coil 1 [Source:HGNC Symbol;Acc:HGNC:24472]                     | 671  | -0.8 | 0.08 | -10.31 | 6.08E-25  | 5.03E-23  |
| ENSG00000130270 | ATP8B3          | ATPase phospholipid transporting 8B3 [Source:HGNC Symbol;Acc:HGNC:13535]                      | 58   | -0.8 | 0.25 | -3.18  | 0.0014559 | 0.0087209 |
| ENSG00000159388 | BTG2            | BTG anti-proliferation factor 2 [Source:HGNC Symbol;Acc:HGNC:1131]                            | 290  | -0.8 | 0.11 | -7.13  | 1.03E-12  | 3.13E-11  |
| ENSG00000106624 | AEBP1           | AE binding protein 1 [Source:HGNC Symbol;Acc:HGNC:303]                                        | 227  | -0.8 | 0.14 | -5.75  | 9.19E-09  | 1.73E-07  |
| ENSG00000074966 | TXK             | TXK tyrosine kinase [Source:HGNC Symbol;Acc:HGNC:12434]                                       | 78   | -0.8 | 0.22 | -3.52  | 4.34E-04  | 0.0030885 |
| ENSG00000126821 | SGPP1           | sphingosine-1-phosphate phosphatase 1 [Source:HGNC Symbol;Acc:HGNC:17720]                     | 47   | -0.8 | 0.27 | -2.94  | 0.0033195 | 0.017452  |
| ENSG00000280734 | LINC01232       | long intergenic non-protein coding RNA 1232 [Source:HGNC Symbol;Acc:HGNC:49755]               | 114  | -0.8 | 0.18 | -4.35  | 1.38E-05  | 1.44E-04  |
| ENSG00000205363 | INSYN1          | inhibitory synaptic factor 1 [Source:HGNC Symbol;Acc:HGNC:33753]                              | 60   | -0.8 | 0.24 | -3.24  | 0.0011752 | 0.0072969 |
| ENSG00000144407 | PTH2R           | parathyroid hormone 2 receptor [Source:HGNC Symbol;Acc:HGNC:9609]                             | 65   | -0.8 | 0.23 | -3.38  | 7.34E-04  | 0.0048703 |
| ENSG00000275223 | ENSG00000275223 | novel transcript                                                                              | 89   | -0.8 | 0.20 | -3.89  | 9.84E-05  | 8.46E-04  |
| ENSG00000103044 | HAS3            | hyaluronan synthase 3 [Source:HGNC Symbol;Acc:HGNC:4820]                                      | 354  | -0.8 | 0.10 | -7.37  | 1.69E-13  | 5.65E-12  |
| ENSG00000169169 | CPT1C           | carnitine palmitoyltransferase 1C [Source:HGNC Symbol;Acc:HGNC:18540]                         | 214  | -0.8 | 0.13 | -5.88  | 4.11E-09  | 8.05E-08  |
| ENSG00000114737 | CISH            | cytokine inducible SH2 containing protein [Source:HGNC Symbol;Acc:HGNC:1984]                  | 59   | -0.8 | 0.24 | -3.20  | 0.0013938 | 0.0083985 |
| ENSG00000163517 | HDAC11          | histone deacetylase 11 [Source:HGNC Symbol;Acc:HGNC:19086]                                    | 539  | -0.8 | 0.08 | -9.07  | 1.18E-19  | 6.79E-18  |
| ENSG00000105559 | PLEKHA4         | pleckstrin homology domain containing A4 [Source:HGNC Symbol;Acc:HGNC:14339]                  | 91   | -0.8 | 0.21 | -3.66  | 2.48E-04  | 0.0018996 |
| ENSG00000183486 | MX2             | MX dynamin like GTPase 2 [Source:HGNC Symbol;Acc:HGNC:7533]                                   | 74   | -0.8 | 0.26 | -2.90  | 0.0037342 | 0.0191691 |
| ENSG00000089127 | OAS1            | 2'-5'-oligoadenylate synthetase 1 [Source:HGNC Symbol;Acc:HGNC:8086]                          | 2198 | -0.8 | 0.05 | -15.46 | 6.72E-54  | 2.58E-51  |
| ENSG00000143382 | ADAMTSL4        | ADAMTS like 4 [Source:HGNC Symbol;Acc:HGNC:19706]                                             | 1284 | -0.8 | 0.06 | -12.23 | 2.10E-34  | 2.89E-32  |
| ENSG00000110042 | DTX4            | deltex E3 ubiquitin ligase 4 [Source:HGNC Symbol;Acc:HGNC:29151]                              | 2284 | -0.8 | 0.05 | -16.35 | 4.62E-60  | 2.13E-57  |
| ENSG00000171680 | PLEKHG5         | pleckstrin homology and RhoGEF domain containing G5 [Source:HGNC Symbol;Acc:HGNC:29105]       | 497  | -0.8 | 0.10 | -7.82  | 5.17E-15  | 1.97E-13  |
| ENSG00000185924 | RTN4RL1         | reticulon 4 receptor like 1 [Source:HGNC Symbol;Acc:HGNC:21329]                               | 67   | -0.8 | 0.24 | -3.20  | 0.0013612 | 0.0082395 |
| ENSG00000182103 | FAM181B         | family with sequence similarity 181 member B [Source:HGNC Symbol;Acc:HGNC:28512]              | 202  | -0.8 | 0.15 | -5.16  | 2.42E-07  | 3.56E-06  |
| ENSG00000116990 | MYCL            | MYCL proto-oncogene, bHLH transcription factor [Source:HGNC Symbol;Acc:HGNC:7555]             | 1013 | -0.8 | 0.07 | -10.60 | 2.95E-26  | 2.73E-24  |
| ENSG00000119711 | ALDH6A1         | aldehyde dehydrogenase 6 family member A1 [Source:HGNC Symbol;Acc:HGNC:7179]                  | 64   | -0.8 | 0.26 | -2.90  | 0.0036801 | 0.0189736 |
| ENSG00000070731 | ST6GALNAC2      | ST6 N-acetylgalactosaminide alpha-2,6-sialyltransferase 2 [Source:HGNC Symbol;Acc:HGNC:10867] | 221  | -0.8 | 0.13 | -5.77  | 7.87E-09  | 1.49E-07  |
| ENSG00000106804 | C5              | complement C5 [Source:HGNC Symbol;Acc:HGNC:1331]                                              | 68   | -0.8 | 0.23 | -3.23  | 0.0012452 | 0.0076436 |
| ENSG00000166387 | PPFIBP2         | PPFIA binding protein 2 [Source:HGNC Symbol;Acc:HGNC:9250]                                    | 266  | -0.8 | 0.13 | -5.98  | 2.29E-09  | 4.68E-08  |
| ENSG00000154227 | CERS3           | ceramide synthase 3 [Source:HGNC Symbol;Acc:HGNC:23752]                                       | 140  | -0.8 | 0.16 | -4.61  | 4.06E-06  | 4.77E-05  |
| ENSG00000174808 | BTC             | betacellulin [Source:HGNC Symbol;Acc:HGNC:1121]                                               | 572  | -0.8 | 0.09 | -8.67  | 4.18E-18  | 2.10E-16  |
| ENSG00000111335 | OAS2            | 2'-5'-oligoadenylate synthetase 2 [Source:HGNC Symbol;Acc:HGNC:8087]                          | 1719 | -0.7 | 0.06 | -13.43 | 4.04E-41  | 7.85E-39  |
| ENSG00000088280 | ASAP3           | ArfGAP with SH3 domain, ankyrin repeat and PH domain 3 [Source:HGNC Symbol;Acc:HGNC:14987]    | 389  | -0.7 | 0.10 | -7.42  | 1.14E-13  | 3.84E-12  |
| ENSG00000285108 | ENSG00000285108 | novel transcript                                                                              | 108  | -0.7 | 0.19 | -3.99  | 6.62E-05  | 5.94E-04  |
| ENSG00000274602 | PI4KAP1         | phosphatidylinositol 4-kinase alpha pseudogene 1 [Source:HGNC Symbol;Acc:HGNC:33576]          | 773  | -0.7 | 0.07 | -10.03 | 1.16E-23  | 8.97E-22  |
| ENSG00000166839 | ANKDD1A         | ankyrin repeat and death domain containing 1A [Source:HGNC Symbol;Acc:HGNC:28002]             | 136  | -0.7 | 0.16 | -4.66  | 3.15E-06  | 3.81E-05  |

|                 |                 |                                                                                                      |      |      |      |        |           |           |
|-----------------|-----------------|------------------------------------------------------------------------------------------------------|------|------|------|--------|-----------|-----------|
| ENSG00000165125 | TRPV6           | transient receptor potential cation channel subfamily V member 6 [Source:HGNC Symbol;Acc:HGNC:14006] | 459  | -0.7 | 0.09 | -8.26  | 1.50E-16  | 6.70E-15  |
| ENSG00000173369 | C1QB            | complement C1q B chain [Source:HGNC Symbol;Acc:HGNC:1242]                                            | 122  | -0.7 | 0.20 | -3.70  | 2.18E-04  | 0.0016914 |
| ENSG00000266970 | SOCS3-DT        | SOCS3 divergent transcript [Source:HGNC Symbol;Acc:HGNC:52799]                                       | 53   | -0.7 | 0.26 | -2.86  | 0.0042993 | 0.021636  |
| ENSG00000100918 | REC8            | REC8 meiotic recombination protein [Source:HGNC Symbol;Acc:HGNC:16879]                               | 57   | -0.7 | 0.25 | -2.97  | 0.0029734 | 0.0159856 |
| ENSG00000168907 | PLA2G4F         | phospholipase A2 group IVF [Source:HGNC Symbol;Acc:HGNC:27396]                                       | 207  | -0.7 | 0.13 | -5.53  | 3.20E-08  | 5.43E-07  |
| ENSG00000079385 | CEACAM1         | CEA cell adhesion molecule 1 [Source:HGNC Symbol;Acc:HGNC:1814]                                      | 371  | -0.7 | 0.11 | -6.87  | 6.44E-12  | 1.84E-10  |
| ENSG00000237289 | CKMT1B          | creatine kinase, mitochondrial 1B [Source:HGNC Symbol;Acc:HGNC:1995]                                 | 442  | -0.7 | 0.10 | -7.22  | 5.23E-13  | 1.66E-11  |
| ENSG00000100033 | PRODH           | proline dehydrogenase 1 [Source:HGNC Symbol;Acc:HGNC:9453]                                           | 50   | -0.7 | 0.28 | -2.63  | 0.008531  | 0.0379131 |
| ENSG00000184611 | KCNH7           | potassium voltage-gated channel subfamily H member 7 [Source:HGNC Symbol;Acc:HGNC:18863]             | 54   | -0.7 | 0.26 | -2.82  | 0.0047886 | 0.0235831 |
| ENSG00000007944 | MYLIP           | myosin regulatory light chain interacting protein [Source:HGNC Symbol;Acc:HGNC:21155]                | 326  | -0.7 | 0.11 | -6.68  | 2.46E-11  | 6.61E-10  |
| ENSG00000197641 | SERPINB13       | serpin family B member 13 [Source:HGNC Symbol;Acc:HGNC:8944]                                         | 471  | -0.7 | 0.09 | -7.83  | 5.02E-15  | 1.92E-13  |
| ENSG00000163131 | CTSS            | cathepsin S [Source:HGNC Symbol;Acc:HGNC:2545]                                                       | 134  | -0.7 | 0.16 | -4.51  | 6.54E-06  | 7.43E-05  |
| ENSG00000100271 | TTL1            | tubulin tyrosine ligase like 1 [Source:HGNC Symbol;Acc:HGNC:1312]                                    | 104  | -0.7 | 0.20 | -3.64  | 2.70E-04  | 0.0020372 |
| ENSG00000218014 | KRT19P1         | keratin 19 pseudogene 1 [Source:HGNC Symbol;Acc:HGNC:33422]                                          | 84   | -0.7 | 0.21 | -3.50  | 4.72E-04  | 0.0033318 |
| ENSG00000224940 | PRRT4           | proline rich transmembrane protein 4 [Source:HGNC Symbol;Acc:HGNC:37280]                             | 909  | -0.7 | 0.07 | -10.55 | 5.14E-26  | 4.70E-24  |
| ENSG00000123243 | ITIH5           | inter-alpha-trypsin inhibitor heavy chain 5 [Source:HGNC Symbol;Acc:HGNC:21449]                      | 646  | -0.7 | 0.08 | -9.13  | 6.63E-20  | 3.89E-18  |
| ENSG00000172086 | KRCC1           | lysine rich coiled-coil 1 [Source:HGNC Symbol;Acc:HGNC:28039]                                        | 186  | -0.7 | 0.14 | -5.09  | 3.60E-07  | 5.13E-06  |
| ENSG00000164674 | SYTL3           | synaptotagmin like 3 [Source:HGNC Symbol;Acc:HGNC:15587]                                             | 46   | -0.7 | 0.28 | -2.59  | 0.009524  | 0.0414016 |
| ENSG00000259877 | ENSG00000259877 | novel transcript, antisense to ZNF778                                                                | 56   | -0.7 | 0.26 | -2.76  | 0.0057146 | 0.0272201 |
| ENSG00000130701 | RBBP8NL         | RBBP8 N-terminal like [Source:HGNC Symbol;Acc:HGNC:16144]                                            | 415  | -0.7 | 0.10 | -7.22  | 5.04E-13  | 1.60E-11  |
| ENSG00000196189 | SEMA4A          | semaphorin 4A [Source:HGNC Symbol;Acc:HGNC:10729]                                                    | 107  | -0.7 | 0.20 | -3.65  | 2.62E-04  | 0.0019929 |
| ENSG00000130487 | KLHDCA7B        | kelch domain containing 7B [Source:HGNC Symbol;Acc:HGNC:25145]                                       | 132  | -0.7 | 0.17 | -4.19  | 2.75E-05  | 2.72E-04  |
| ENSG00000096006 | CRISP3          | cysteine rich secretory protein 3 [Source:HGNC Symbol;Acc:HGNC:16904]                                | 85   | -0.7 | 0.20 | -3.52  | 4.37E-04  | 0.003106  |
| ENSG00000130592 | LSP1            | lymphocyte specific protein 1 [Source:HGNC Symbol;Acc:HGNC:6707]                                     | 66   | -0.7 | 0.25 | -2.90  | 0.0037085 | 0.0190679 |
| ENSG00000177614 | PGBD5           | piggyBac transposable element derived 5 [Source:HGNC Symbol;Acc:HGNC:19405]                          | 117  | -0.7 | 0.18 | -4.02  | 5.80E-05  | 5.29E-04  |
| ENSG00000073331 | ALPK1           | alpha kinase 1 [Source:HGNC Symbol;Acc:HGNC:20917]                                                   | 220  | -0.7 | 0.13 | -5.38  | 7.60E-08  | 1.22E-06  |
| ENSG00000092036 | HAUS4           | HAUS augmin like complex subunit 4 [Source:HGNC Symbol;Acc:HGNC:20163]                               | 65   | -0.7 | 0.24 | -2.92  | 0.0034911 | 0.01817   |
| ENSG00000115738 | ID2             | inhibitor of DNA binding 2 [Source:HGNC Symbol;Acc:HGNC:5361]                                        | 724  | -0.7 | 0.08 | -8.34  | 7.25E-17  | 3.33E-15  |
| ENSG00000172382 | PRSS27          | serine protease 27 [Source:HGNC Symbol;Acc:HGNC:15475]                                               | 330  | -0.7 | 0.11 | -6.63  | 3.41E-11  | 8.93E-10  |
| ENSG00000269896 | ENSG00000269896 | small nuclear ribonucleoprotein N (SNRPN) pseudogene                                                 | 59   | -0.7 | 0.24 | -2.95  | 0.0032127 | 0.0170342 |
| ENSG00000114841 | DNAH1           | dynein axonemal heavy chain 1 [Source:HGNC Symbol;Acc:HGNC:2940]                                     | 56   | -0.7 | 0.25 | -2.84  | 0.0045719 | 0.0227453 |
| ENSG00000155926 | SLA             | Src like adaptor [Source:HGNC Symbol;Acc:HGNC:10902]                                                 | 128  | -0.7 | 0.19 | -3.73  | 1.91E-04  | 0.0015013 |
| ENSG00000186529 | CYP4F3          | cytochrome P450 family 4 subfamily F member 3 [Source:HGNC Symbol;Acc:HGNC:2646]                     | 619  | -0.7 | 0.08 | -8.79  | 1.43E-18  | 7.51E-17  |
| ENSG00000182492 | BGN             | biglycan [Source:HGNC Symbol;Acc:HGNC:1044]                                                          | 1207 | -0.7 | 0.06 | -10.87 | 1.52E-27  | 1.53E-25  |
| ENSG00000087250 | MT3             | metallothionein 3 [Source:HGNC Symbol;Acc:HGNC:7408]                                                 | 124  | -0.7 | 0.18 | -3.81  | 1.37E-04  | 0.0011281 |
| ENSG00000226964 | RHEBP2          | RHEB pseudogene 2 [Source:HGNC Symbol;Acc:HGNC:44991]                                                | 68   | -0.7 | 0.24 | -2.94  | 0.0032663 | 0.017251  |
| ENSG00000165389 | SPTSSA          | serine palmitoyltransferase small subunit A [Source:HGNC Symbol;Acc:HGNC:20361]                      | 2691 | -0.7 | 0.05 | -14.65 | 1.33E-48  | 4.38E-46  |
| ENSG00000095585 | BLNK            | B cell linker [Source:HGNC Symbol;Acc:HGNC:14211]                                                    | 138  | -0.7 | 0.17 | -4.11  | 3.92E-05  | 3.73E-04  |
| ENSG00000137628 | DDX60           | DEXD/H-box helicase 60 [Source:HGNC Symbol;Acc:HGNC:25942]                                           | 970  | -0.7 | 0.07 | -10.10 | 5.75E-24  | 4.48E-22  |
| ENSG00000181908 | LINC02724       | long intergenic non-protein coding RNA 2724 [Source:HGNC Symbol;Acc:HGNC:54241]                      | 75   | -0.7 | 0.23 | -2.99  | 0.0028354 | 0.0153938 |
| ENSG00000167646 | DNAAF3          | dynein axonemal assembly factor 3 [Source:HGNC Symbol;Acc:HGNC:30492]                                | 98   | -0.7 | 0.19 | -3.58  | 3.41E-04  | 0.0024951 |
| ENSG00000134627 | PIWIL4          | piwi like RNA-mediated gene silencing 4 [Source:HGNC Symbol;Acc:HGNC:18444]                          | 114  | -0.7 | 0.18 | -3.86  | 1.12E-04  | 9.46E-04  |

|                 |              |                                                                                              |      |      |      |        |           |           |
|-----------------|--------------|----------------------------------------------------------------------------------------------|------|------|------|--------|-----------|-----------|
| ENSG00000181143 | MUC16        | mucin 16, cell surface associated [Source:HGNC Symbol;Acc:HGNC:15582]                        | 1080 | -0.7 | 0.07 | -10.48 | 1.06E-25  | 9.30E-24  |
| ENSG00000163293 | NIPAL1       | NIPA like domain containing 1 [Source:HGNC Symbol;Acc:HGNC:27194]                            | 1031 | -0.7 | 0.06 | -10.95 | 6.89E-28  | 7.12E-26  |
| ENSG00000150893 | FREM2        | FRAS1 related extracellular matrix 2 [Source:HGNC Symbol;Acc:HGNC:25396]                     | 951  | -0.7 | 0.07 | -9.78  | 1.43E-22  | 1.03E-20  |
| ENSG00000182782 | HCAR2        | hydroxycarboxylic acid receptor 2 [Source:HGNC Symbol;Acc:HGNC:24827]                        | 93   | -0.7 | 0.21 | -3.29  | 9.93E-04  | 0.0063049 |
| ENSG00000163823 | CCR1         | C-C motif chemokine receptor 1 [Source:HGNC Symbol;Acc:HGNC:1602]                            | 133  | -0.7 | 0.17 | -3.91  | 9.05E-05  | 7.87E-04  |
| ENSG00000133678 | TMEM254      | transmembrane protein 254 [Source:HGNC Symbol;Acc:HGNC:25804]                                | 682  | -0.7 | 0.08 | -8.98  | 2.82E-19  | 1.56E-17  |
| ENSG00000134760 | DSG1         | desmoglein 1 [Source:HGNC Symbol;Acc:HGNC:3048]                                              | 725  | -0.7 | 0.07 | -9.13  | 6.87E-20  | 4.01E-18  |
| ENSG00000133135 | RNF128       | ring finger protein 128 [Source:HGNC Symbol;Acc:HGNC:21153]                                  | 61   | -0.7 | 0.24 | -2.84  | 0.004513  | 0.0224936 |
| ENSG00000105514 | RAB3D        | RAB3D, member RAS oncogene family [Source:HGNC Symbol;Acc:HGNC:9779]                         | 542  | -0.7 | 0.09 | -7.70  | 1.34E-14  | 4.83E-13  |
| ENSG00000177575 | CD163        | CD163 molecule [Source:HGNC Symbol;Acc:HGNC:1631]                                            | 285  | -0.7 | 0.23 | -2.88  | 0.0039923 | 0.0203069 |
| ENSG00000132746 | ALDH3B2      | aldehyde dehydrogenase 3 family member B2 [Source:HGNC Symbol;Acc:HGNC:411]                  | 264  | -0.7 | 0.12 | -5.52  | 3.32E-08  | 5.62E-07  |
| ENSG00000105655 | ISYNA1       | inositol-3-phosphate synthase 1 [Source:HGNC Symbol;Acc:HGNC:29821]                          | 1990 | -0.7 | 0.05 | -12.54 | 4.57E-36  | 6.82E-34  |
| ENSG00000157601 | MX1          | MX dynamin like GTPase 1 [Source:HGNC Symbol;Acc:HGNC:7532]                                  | 7927 | -0.7 | 0.03 | -19.56 | 3.57E-85  | 3.84E-82  |
| ENSG00000156500 | PABIR3       | PABIR family member 3 [Source:HGNC Symbol;Acc:HGNC:25202]                                    | 66   | -0.7 | 0.23 | -2.88  | 0.0039802 | 0.0202578 |
| ENSG00000006534 | ALDH3B1      | aldehyde dehydrogenase 3 family member B1 [Source:HGNC Symbol;Acc:HGNC:410]                  | 663  | -0.7 | 0.08 | -8.73  | 2.56E-18  | 1.31E-16  |
| ENSG00000140451 | PIF1         | PIF1 5'-to-3' DNA helicase [Source:HGNC Symbol;Acc:HGNC:26220]                               | 388  | -0.7 | 0.10 | -6.43  | 1.30E-10  | 3.14E-09  |
| ENSG00000129455 | KLK8         | kallikrein related peptidase 8 [Source:HGNC Symbol;Acc:HGNC:6369]                            | 68   | -0.7 | 0.24 | -2.79  | 0.0053433 | 0.0257178 |
| ENSG00000111344 | RASAL1       | RAS protein activator like 1 [Source:HGNC Symbol;Acc:HGNC:9873]                              | 64   | -0.7 | 0.23 | -2.83  | 0.0046061 | 0.0228589 |
| ENSG00000185010 | F8           | coagulation factor VIII [Source:HGNC Symbol;Acc:HGNC:3546]                                   | 79   | -0.7 | 0.21 | -3.16  | 0.001603  | 0.0094716 |
| ENSG00000180353 | HCLS1        | hematopoietic cell-specific Lyn substrate 1 [Source:HGNC Symbol;Acc:HGNC:4844]               | 106  | -0.7 | 0.21 | -3.06  | 0.0022216 | 0.0125165 |
| ENSG00000121966 | CXCR4        | C-X-C motif chemokine receptor 4 [Source:HGNC Symbol;Acc:HGNC:2561]                          | 84   | -0.7 | 0.25 | -2.59  | 0.0095634 | 0.0415056 |
| ENSG00000148400 | NOTCH1       | notch receptor 1 [Source:HGNC Symbol;Acc:HGNC:7881]                                          | 908  | -0.7 | 0.07 | -9.64  | 5.68E-22  | 3.93E-20  |
| ENSG00000196696 | PDXDC2P-NPIP | nuclear pore complex-interacting protein [Source:NCBI gene (formerly Entrezgene);Acc:283970] | 64   | -0.7 | 0.23 | -2.82  | 0.0048251 | 0.0237196 |
| ENSG00000134258 | VTCN1        | V-set domain containing T cell activation inhibitor 1 [Source:HGNC Symbol;Acc:HGNC:28873]    | 901  | -0.7 | 0.08 | -8.19  | 2.64E-16  | 1.15E-14  |
| ENSG00000183401 | CCDC159      | coiled-coil domain containing 159 [Source:HGNC Symbol;Acc:HGNC:26996]                        | 134  | -0.6 | 0.16 | -4.04  | 5.37E-05  | 4.94E-04  |
| ENSG00000090661 | CERS4        | ceramide synthase 4 [Source:HGNC Symbol;Acc:HGNC:23747]                                      | 471  | -0.6 | 0.09 | -7.36  | 1.78E-13  | 5.92E-12  |
| ENSG00000124143 | ARHGAP40     | Rho GTPase activating protein 40 [Source:HGNC Symbol;Acc:HGNC:16226]                         | 1102 | -0.6 | 0.06 | -10.42 | 1.93E-25  | 1.68E-23  |
| ENSG00000183145 | RIPPLY3      | rippy transcriptional repressor 3 [Source:HGNC Symbol;Acc:HGNC:3047]                         | 154  | -0.6 | 0.15 | -4.24  | 2.24E-05  | 2.26E-04  |
| ENSG00000162390 | ACOT11       | acyl-CoA thioesterase 11 [Source:HGNC Symbol;Acc:HGNC:18156]                                 | 298  | -0.6 | 0.11 | -5.83  | 5.52E-09  | 1.07E-07  |
| ENSG00000116032 | GRIN3B       | glutamate ionotropic receptor NMDA type subunit 3B [Source:HGNC Symbol;Acc:HGNC:16768]       | 72   | -0.6 | 0.23 | -2.83  | 0.0046726 | 0.0231321 |
| ENSG00000106571 | GLI3         | GLI family zinc finger 3 [Source:HGNC Symbol;Acc:HGNC:4319]                                  | 299  | -0.6 | 0.11 | -5.94  | 2.81E-09  | 5.66E-08  |
| ENSG00000076770 | MBNL3        | muscleblind like splicing regulator 3 [Source:HGNC Symbol;Acc:HGNC:20564]                    | 114  | -0.6 | 0.19 | -3.43  | 5.95E-04  | 0.0040733 |
| ENSG00000169635 | HIC2         | HIC ZBTB transcriptional repressor 2 [Source:HGNC Symbol;Acc:HGNC:18595]                     | 1201 | -0.6 | 0.06 | -10.73 | 7.16E-27  | 6.83E-25  |
| ENSG00000133315 | MACROD1      | mono-ADP ribosylhydrolase 1 [Source:HGNC Symbol;Acc:HGNC:29598]                              | 422  | -0.6 | 0.10 | -6.43  | 1.29E-10  | 3.13E-09  |
| ENSG00000171462 | DLK2         | delta like non-canonical Notch ligand 2 [Source:HGNC Symbol;Acc:HGNC:21113]                  | 392  | -0.6 | 0.10 | -6.56  | 5.37E-11  | 1.37E-09  |
| ENSG00000108691 | CCL2         | C-C motif chemokine ligand 2 [Source:HGNC Symbol;Acc:HGNC:10618]                             | 155  | -0.6 | 0.18 | -3.57  | 3.61E-04  | 0.0026267 |
| ENSG00000204323 | SMIM5        | small integral membrane protein 5 [Source:HGNC Symbol;Acc:HGNC:40030]                        | 1286 | -0.6 | 0.06 | -10.89 | 1.30E-27  | 1.32E-25  |
| ENSG00000169758 | TMEM266      | transmembrane protein 266 [Source:HGNC Symbol;Acc:HGNC:26763]                                | 224  | -0.6 | 0.13 | -5.00  | 5.75E-07  | 7.89E-06  |
| ENSG00000245848 | CEBPA        | CCAAT enhancer binding protein alpha [Source:HGNC Symbol;Acc:HGNC:1833]                      | 404  | -0.6 | 0.12 | -5.11  | 3.14E-07  | 4.52E-06  |
| ENSG00000156587 | UBE2L6       | ubiquitin conjugating enzyme E2 L6 [Source:HGNC Symbol;Acc:HGNC:12490]                       | 2273 | -0.6 | 0.05 | -12.75 | 3.13E-37  | 5.05E-35  |
| ENSG00000110492 | MDK          | midkine [Source:HGNC Symbol;Acc:HGNC:6972]                                                   | 2469 | -0.6 | 0.05 | -13.72 | 8.22E-43  | 1.92E-40  |
| ENSG00000237149 | ZNF503-AS2   | ZNF503 antisense RNA 2 [Source:HGNC Symbol;Acc:HGNC:23525]                                   | 126  | -0.6 | 0.17 | -3.71  | 2.06E-04  | 0.0016077 |



|                 |                 |                                                                                              |       |      |      |        |           |           |
|-----------------|-----------------|----------------------------------------------------------------------------------------------|-------|------|------|--------|-----------|-----------|
| ENSG00000134317 | GRHL1           | grainyhead like transcription factor 1 [Source:HGNC Symbol;Acc:HGNC:17923]                   | 1375  | -0.6 | 0.06 | -10.51 | 7.58E-26  | 6.78E-24  |
| ENSG00000180251 | SLC9A4          | solute carrier family 9 member A4 [Source:HGNC Symbol;Acc:HGNC:11077]                        | 94    | -0.6 | 0.21 | -2.98  | 0.002889  | 0.0156373 |
| ENSG00000164050 | PLXNB1          | plexin B1 [Source:HGNC Symbol;Acc:HGNC:9103]                                                 | 2574  | -0.6 | 0.04 | -13.89 | 7.81E-44  | 2.03E-41  |
| ENSG00000137975 | CLCA2           | chloride channel accessory 2 [Source:HGNC Symbol;Acc:HGNC:2016]                              | 2440  | -0.6 | 0.04 | -13.84 | 1.41E-43  | 3.54E-41  |
| ENSG00000103490 | PYCARD          | PYD and CARD domain containing [Source:HGNC Symbol;Acc:HGNC:16608]                           | 217   | -0.6 | 0.13 | -4.78  | 1.78E-06  | 2.25E-05  |
| ENSG00000165795 | NDRG2           | NDRG family member 2 [Source:HGNC Symbol;Acc:HGNC:14460]                                     | 252   | -0.6 | 0.12 | -5.15  | 2.57E-07  | 3.74E-06  |
| ENSG00000127954 | STEAP4          | STEAP4 metalloredutase [Source:HGNC Symbol;Acc:HGNC:21923]                                   | 319   | -0.6 | 0.11 | -5.60  | 2.19E-08  | 3.85E-07  |
| ENSG00000116711 | PLA2G4A         | phospholipase A2 group IVA [Source:HGNC Symbol;Acc:HGNC:9035]                                | 106   | -0.6 | 0.19 | -3.22  | 0.0013007 | 0.0079389 |
| ENSG00000255690 | TRIL            | TLR4 interactor with leucine rich repeats [Source:HGNC Symbol;Acc:HGNC:22200]                | 102   | -0.6 | 0.20 | -3.12  | 0.0017845 | 0.0103915 |
| ENSG00000149043 | SYT8            | synaptotagmin 8 [Source:HGNC Symbol;Acc:HGNC:19264]                                          | 98    | -0.6 | 0.19 | -3.26  | 0.0011161 | 0.0069846 |
| ENSG00000134321 | RSAD2           | radical S-adenosyl methionine domain containing 2 [Source:HGNC Symbol;Acc:HGNC:30908]        | 826   | -0.6 | 0.19 | -3.21  | 0.0013219 | 0.0080525 |
| ENSG00000184985 | SORCS2          | sortilin related VPS10 domain containing receptor 2 [Source:HGNC Symbol;Acc:HGNC:16698]      | 109   | -0.6 | 0.19 | -3.17  | 0.0015167 | 0.0090348 |
| ENSG00000282851 | BISPR           | BST2 interferon stimulated positive regulator [Source:HGNC Symbol;Acc:HGNC:51290]            | 173   | -0.6 | 0.15 | -4.11  | 3.90E-05  | 3.72E-04  |
| ENSG00000144648 | ACKR2           | atypical chemokine receptor 2 [Source:HGNC Symbol;Acc:HGNC:1565]                             | 86    | -0.6 | 0.20 | -3.09  | 0.0020065 | 0.011465  |
| ENSG00000072310 | SREBF1          | sterol regulatory element binding transcription factor 1 [Source:HGNC Symbol;Acc:HGNC:11289] | 2103  | -0.6 | 0.06 | -10.84 | 2.26E-27  | 2.25E-25  |
| ENSG00000104361 | NIPAL2          | NIPA like domain containing 2 [Source:HGNC Symbol;Acc:HGNC:25854]                            | 325   | -0.6 | 0.10 | -5.83  | 5.69E-09  | 1.10E-07  |
| ENSG00000187266 | EPOR            | erythropoietin receptor [Source:HGNC Symbol;Acc:HGNC:3416]                                   | 125   | -0.6 | 0.17 | -3.52  | 4.26E-04  | 0.0030412 |
| ENSG00000158106 | RHPN1           | rhophilin Rho GTPase binding protein 1 [Source:HGNC Symbol;Acc:HGNC:19973]                   | 530   | -0.6 | 0.09 | -7.13  | 9.93E-13  | 3.03E-11  |
| ENSG00000101144 | BMP7            | bone morphogenetic protein 7 [Source:HGNC Symbol;Acc:HGNC:1074]                              | 7304  | -0.6 | 0.04 | -16.29 | 1.24E-59  | 5.55E-57  |
| ENSG00000142449 | FBN3            | fibrillin 3 [Source:HGNC Symbol;Acc:HGNC:18794]                                              | 131   | -0.6 | 0.18 | -3.45  | 5.66E-04  | 0.0039004 |
| ENSG00000105894 | PTN             | pleiotrophin [Source:HGNC Symbol;Acc:HGNC:9630]                                              | 104   | -0.6 | 0.20 | -2.99  | 0.0027942 | 0.0151956 |
| ENSG00000121316 | PLBD1           | phospholipase B domain containing 1 [Source:HGNC Symbol;Acc:HGNC:26215]                      | 1042  | -0.6 | 0.07 | -8.95  | 3.67E-19  | 2.01E-17  |
| ENSG00000117480 | FAAH            | fatty acid amide hydrolase [Source:HGNC Symbol;Acc:HGNC:3553]                                | 95    | -0.6 | 0.19 | -3.12  | 0.0017902 | 0.0104175 |
| ENSG00000060656 | PTPRU           | protein tyrosine phosphatase receptor type U [Source:HGNC Symbol;Acc:HGNC:9683]              | 3579  | -0.6 | 0.04 | -14.61 | 2.26E-48  | 7.14E-46  |
| ENSG00000223572 | CKMT1A          | creatine kinase, mitochondrial 1A [Source:HGNC Symbol;Acc:HGNC:31736]                        | 309   | -0.6 | 0.12 | -5.12  | 3.04E-07  | 4.40E-06  |
| ENSG00000142765 | SYTL1           | synaptotagmin like 1 [Source:HGNC Symbol;Acc:HGNC:15584]                                     | 815   | -0.6 | 0.07 | -8.35  | 6.98E-17  | 3.22E-15  |
| ENSG00000144847 | IGSF11          | immunoglobulin superfamily member 11 [Source:HGNC Symbol;Acc:HGNC:16669]                     | 108   | -0.6 | 0.18 | -3.34  | 8.37E-04  | 0.0054444 |
| ENSG00000259943 | ENSG00000259943 | novel transcript, antisense to ZMPSTE24                                                      | 104   | -0.6 | 0.18 | -3.28  | 0.0010281 | 0.0065015 |
| ENSG00000163565 | IFI16           | interferon gamma inducible protein 16 [Source:HGNC Symbol;Acc:HGNC:5395]                     | 682   | -0.6 | 0.08 | -7.15  | 8.59E-13  | 2.65E-11  |
| ENSG00000182054 | IDH2            | isocitrate dehydrogenase (NADP(+)) 2 [Source:HGNC Symbol;Acc:HGNC:5383]                      | 1908  | -0.6 | 0.06 | -10.73 | 7.24E-27  | 6.87E-25  |
| ENSG00000152582 | SPEF2           | sperm flagellar 2 [Source:HGNC Symbol;Acc:HGNC:26293]                                        | 150   | -0.6 | 0.16 | -3.76  | 1.69E-04  | 0.0013495 |
| ENSG00000172594 | SMPDL3A         | sphingomyelin phosphodiesterase acid like 3A [Source:HGNC Symbol;Acc:HGNC:17389]             | 1007  | -0.6 | 0.06 | -9.42  | 4.40E-21  | 2.80E-19  |
| ENSG00000160271 | RALGDS          | ral guanine nucleotide dissociation stimulator [Source:HGNC Symbol;Acc:HGNC:9842]            | 67    | -0.6 | 0.23 | -2.60  | 0.0093964 | 0.0409796 |
| ENSG00000105223 | PLD3            | phospholipase D family member 3 [Source:HGNC Symbol;Acc:HGNC:17158]                          | 3739  | -0.6 | 0.05 | -12.31 | 8.19E-35  | 1.17E-32  |
| ENSG00000154856 | APCDD1          | APC down-regulated 1 [Source:HGNC Symbol;Acc:HGNC:15718]                                     | 101   | -0.6 | 0.18 | -3.23  | 0.0012349 | 0.0075895 |
| ENSG00000165092 | ALDH1A1         | aldehyde dehydrogenase 1 family member A1 [Source:HGNC Symbol;Acc:HGNC:402]                  | 75    | -0.6 | 0.22 | -2.65  | 0.0080337 | 0.0360511 |
| ENSG00000185880 | TRIM69          | tripartite motif containing 69 [Source:HGNC Symbol;Acc:HGNC:17857]                           | 127   | -0.6 | 0.16 | -3.59  | 3.27E-04  | 0.0024096 |
| ENSG00000082482 | KCNK2           | potassium two pore domain channel subfamily K member 2 [Source:HGNC Symbol;Acc:HGNC:6277]    | 97    | -0.6 | 0.19 | -3.11  | 0.0018686 | 0.0108037 |
| ENSG00000136235 | GPNMB           | glycoprotein nmb [Source:HGNC Symbol;Acc:HGNC:4462]                                          | 963   | -0.6 | 0.07 | -8.05  | 7.98E-16  | 3.35E-14  |
| ENSG00000169035 | KLK7            | kallikrein related peptidase 7 [Source:HGNC Symbol;Acc:HGNC:6368]                            | 126   | -0.6 | 0.18 | -3.20  | 0.0013745 | 0.0083042 |
| ENSG00000124374 | PAIP2B          | poly(A) binding protein interacting protein 2B [Source:HGNC Symbol;Acc:HGNC:29200]           | 217   | -0.6 | 0.13 | -4.51  | 6.57E-06  | 7.46E-05  |
| ENSG00000126709 | IFI6            | interferon alpha inducible protein 6 [Source:HGNC Symbol;Acc:HGNC:4054]                      | 32487 | -0.6 | 0.03 | -19.11 | 1.94E-81  | 1.65E-78  |

|                 |                 |                                                                                                |       |      |      |        |           |           |
|-----------------|-----------------|------------------------------------------------------------------------------------------------|-------|------|------|--------|-----------|-----------|
| ENSG00000107736 | CDH23           | cadherin related 23 [Source:HGNC Symbol;Acc:HGNC:13733]                                        | 105   | -0.6 | 0.18 | -3.19  | 0.0014226 | 0.0085466 |
| ENSG00000134326 | CMPK2           | cytidine/uridine monophosphate kinase 2 [Source:HGNC Symbol;Acc:HGNC:27015]                    | 361   | -0.6 | 0.11 | -5.30  | 1.17E-07  | 1.82E-06  |
| ENSG00000160111 | CPAMD8          | C3 and PZP like alpha-2-macroglobulin domain containing 8 [Source:HGNC Symbol;Acc:HGNC:23228]  | 947   | -0.6 | 0.07 | -8.91  | 4.91E-19  | 2.64E-17  |
| ENSG00000182580 | EPHB3           | EPH receptor B3 [Source:HGNC Symbol;Acc:HGNC:3394]                                             | 998   | -0.6 | 0.07 | -8.78  | 1.67E-18  | 8.73E-17  |
| ENSG00000178685 | PARP10          | poly(ADP-ribose) polymerase family member 10 [Source:HGNC Symbol;Acc:HGNC:25895]               | 2920  | -0.6 | 0.04 | -13.77 | 3.61E-43  | 8.83E-41  |
| ENSG00000100368 | CSF2RB          | colony stimulating factor 2 receptor subunit beta [Source:HGNC Symbol;Acc:HGNC:2436]           | 386   | -0.6 | 0.10 | -5.94  | 2.93E-09  | 5.87E-08  |
| ENSG00000177076 | ACER2           | alkaline ceramidase 2 [Source:HGNC Symbol;Acc:HGNC:23675]                                      | 108   | -0.6 | 0.18 | -3.16  | 0.0015831 | 0.0093712 |
| ENSG00000159403 | C1R             | complement C1r [Source:HGNC Symbol;Acc:HGNC:1246]                                              | 136   | -0.6 | 0.16 | -3.54  | 4.02E-04  | 0.0029018 |
| ENSG00000170927 | PKHD1           | PKHD1 ciliary IPT domain containing fibrocystin/polyductin [Source:HGNC Symbol;Acc:HGNC:9016]  | 132   | -0.6 | 0.17 | -3.44  | 5.73E-04  | 0.0039457 |
| ENSG00000196154 | S100A4          | S100 calcium binding protein A4 [Source:HGNC Symbol;Acc:HGNC:10494]                            | 306   | -0.6 | 0.13 | -4.33  | 1.52E-05  | 1.58E-04  |
| ENSG00000140853 | NLR5            | NLR family CARD domain containing 5 [Source:HGNC Symbol;Acc:HGNC:29933]                        | 317   | -0.6 | 0.11 | -5.36  | 8.16E-08  | 1.30E-06  |
| ENSG00000105518 | TMEM205         | transmembrane protein 205 [Source:HGNC Symbol;Acc:HGNC:29631]                                  | 192   | -0.6 | 0.14 | -4.09  | 4.23E-05  | 4.00E-04  |
| ENSG00000077942 | FBLN1           | fibulin 1 [Source:HGNC Symbol;Acc:HGNC:3600]                                                   | 4153  | -0.6 | 0.04 | -13.06 | 5.74E-39  | 1.02E-36  |
| ENSG00000063180 | CA11            | carbonic anhydrase 11 [Source:HGNC Symbol;Acc:HGNC:1370]                                       | 136   | -0.6 | 0.16 | -3.53  | 4.16E-04  | 0.0029897 |
| ENSG00000250256 | ENSG00000250256 | novel transcript                                                                               | 142   | -0.6 | 0.16 | -3.56  | 3.67E-04  | 0.0026673 |
| ENSG00000064655 | EYA2            | EYA transcriptional coactivator and phosphatase 2 [Source:HGNC Symbol;Acc:HGNC:3520]           | 187   | -0.6 | 0.14 | -3.96  | 7.64E-05  | 6.75E-04  |
| ENSG00000213983 | AP1G2           | adaptor related protein complex 1 subunit gamma 2 [Source:HGNC Symbol;Acc:HGNC:556]            | 204   | -0.6 | 0.15 | -3.90  | 9.54E-05  | 8.23E-04  |
| ENSG00000121898 | CPXM2           | carboxypeptidase X, M14 family member 2 [Source:HGNC Symbol;Acc:HGNC:26977]                    | 199   | -0.6 | 0.14 | -4.17  | 3.05E-05  | 2.98E-04  |
| ENSG00000197847 | SLC22A20P       | solute carrier family 22 member 20, pseudogene [Source:HGNC Symbol;Acc:HGNC:29867]             | 95    | -0.6 | 0.19 | -2.88  | 0.0039433 | 0.020102  |
| ENSG00000198246 | SLC29A3         | solute carrier family 29 member 3 [Source:HGNC Symbol;Acc:HGNC:23096]                          | 161   | -0.6 | 0.15 | -3.72  | 1.96E-04  | 0.0015396 |
| ENSG00000011600 | TYROBP          | transmembrane immune signaling adaptor TYROBP [Source:HGNC Symbol;Acc:HGNC:12449]              | 135   | -0.6 | 0.20 | -2.74  | 0.00608   | 0.0286477 |
| ENSG00000170190 | SLC16A5         | solute carrier family 16 member 5 [Source:HGNC Symbol;Acc:HGNC:10926]                          | 351   | -0.6 | 0.10 | -5.50  | 3.88E-08  | 6.48E-07  |
| ENSG00000260231 | KDM7A-DT        | KDM7A divergent transcript [Source:HGNC Symbol;Acc:HGNC:48959]                                 | 116   | -0.6 | 0.17 | -3.25  | 0.0011709 | 0.0072789 |
| ENSG00000185745 | IFIT1           | interferon induced protein with tetratricopeptide repeats 1 [Source:HGNC Symbol;Acc:HGNC:5407] | 3380  | -0.6 | 0.05 | -10.56 | 4.67E-26  | 4.30E-24  |
| ENSG00000179604 | CDC42EP4        | CDC42 effector protein 4 [Source:HGNC Symbol;Acc:HGNC:17147]                                   | 318   | -0.6 | 0.11 | -5.12  | 2.99E-07  | 4.33E-06  |
| ENSG00000070759 | TESK2           | testis associated actin remodelling kinase 2 [Source:HGNC Symbol;Acc:HGNC:11732]               | 508   | -0.6 | 0.09 | -5.93  | 3.01E-09  | 6.02E-08  |
| ENSG00000113657 | DPYSL3          | dihydropyrimidinase like 3 [Source:HGNC Symbol;Acc:HGNC:3015]                                  | 161   | -0.6 | 0.18 | -3.03  | 0.0024429 | 0.0135689 |
| ENSG00000198496 | NBR2            | neighbor of BRCA1 lncRNA 2 [Source:HGNC Symbol;Acc:HGNC:20691]                                 | 108   | -0.5 | 0.18 | -3.08  | 0.0020789 | 0.0118157 |
| ENSG00000148341 | SH3GLB2         | SH3 domain containing GRB2 like, endophilin B2 [Source:HGNC Symbol;Acc:HGNC:10834]             | 2831  | -0.5 | 0.05 | -11.40 | 4.06E-30  | 4.64E-28  |
| ENSG00000138496 | PARP9           | poly(ADP-ribose) polymerase family member 9 [Source:HGNC Symbol;Acc:HGNC:24118]                | 2534  | -0.5 | 0.05 | -11.45 | 2.48E-30  | 2.86E-28  |
| ENSG00000143850 | PLEKHA6         | pleckstrin homology domain containing A6 [Source:HGNC Symbol;Acc:HGNC:17053]                   | 612   | -0.5 | 0.08 | -6.69  | 2.21E-11  | 5.97E-10  |
| ENSG00000233695 | GAS6-AS1        | GAS6 antisense RNA 1 [Source:HGNC Symbol;Acc:HGNC:39826]                                       | 130   | -0.5 | 0.16 | -3.31  | 9.32E-04  | 0.0059782 |
| ENSG00000120915 | EPHX2           | epoxide hydrolase 2 [Source:HGNC Symbol;Acc:HGNC:3402]                                         | 120   | -0.5 | 0.18 | -3.09  | 0.0019768 | 0.0113192 |
| ENSG00000137965 | IFI44           | interferon induced protein 44 [Source:HGNC Symbol;Acc:HGNC:16938]                              | 1577  | -0.5 | 0.06 | -9.57  | 1.07E-21  | 7.21E-20  |
| ENSG00000171345 | KRT19           | keratin 19 [Source:HGNC Symbol;Acc:HGNC:6436]                                                  | 24123 | -0.5 | 0.03 | -16.84 | 1.35E-63  | 7.03E-61  |
| ENSG00000166669 | ATF7IP2         | activating transcription factor 7 interacting protein 2 [Source:HGNC Symbol;Acc:HGNC:20397]    | 124   | -0.5 | 0.18 | -3.09  | 0.0019698 | 0.0112874 |
| ENSG00000064309 | CDON            | cell adhesion associated, oncogene regulated [Source:HGNC Symbol;Acc:HGNC:17104]               | 94    | -0.5 | 0.20 | -2.70  | 0.0068588 | 0.0315737 |
| ENSG00000121552 | CSTA            | cystatin A [Source:HGNC Symbol;Acc:HGNC:2481]                                                  | 776   | -0.5 | 0.15 | -3.70  | 2.12E-04  | 0.0016481 |
| ENSG00000148660 | CAMK2G          | calcium/calmodulin dependent protein kinase II gamma [Source:HGNC Symbol;Acc:HGNC:1463]        | 4218  | -0.5 | 0.04 | -12.50 | 7.28E-36  | 1.08E-33  |
| ENSG00000100505 | TRIM9           | tripartite motif containing 9 [Source:HGNC Symbol;Acc:HGNC:16288]                              | 432   | -0.5 | 0.09 | -5.67  | 1.40E-08  | 2.53E-07  |
| ENSG00000182957 | SPATA13         | spermatogenesis associated 13 [Source:HGNC Symbol;Acc:HGNC:23222]                              | 174   | -0.5 | 0.14 | -3.80  | 1.46E-04  | 0.0011875 |
| ENSG00000182487 | NCF1B           | neutrophil cytosolic factor 1B pseudogene [Source:HGNC Symbol;Acc:HGNC:32522]                  | 97    | -0.5 | 0.20 | -2.61  | 0.0089391 | 0.0394153 |

|                 |                 |                                                                                                                 |      |      |      |        |           |           |
|-----------------|-----------------|-----------------------------------------------------------------------------------------------------------------|------|------|------|--------|-----------|-----------|
| ENSG00000118156 | ZNF541          | zinc finger protein 541 [Source:HGNC Symbol;Acc:HGNC:25294]                                                     | 107  | -0.5 | 0.18 | -2.94  | 0.0033316 | 0.0175097 |
| ENSG00000075275 | CELSR1          | cadherin EGF LAG seven-pass G-type receptor 1 [Source:HGNC Symbol;Acc:HGNC:1850]                                | 1308 | -0.5 | 0.06 | -8.45  | 2.91E-17  | 1.37E-15  |
| ENSG00000166436 | TRIM66          | tripartite motif containing 66 [Source:HGNC Symbol;Acc:HGNC:29005]                                              | 107  | -0.5 | 0.18 | -2.96  | 0.0031073 | 0.0165518 |
| ENSG00000111275 | ALDH2           | aldehyde dehydrogenase 2 family member [Source:HGNC Symbol;Acc:HGNC:404]                                        | 538  | -0.5 | 0.08 | -6.34  | 2.28E-10  | 5.33E-09  |
| ENSG00000132530 | XAF1            | XIAP associated factor 1 [Source:HGNC Symbol;Acc:HGNC:30932]                                                    | 326  | -0.5 | 0.11 | -4.89  | 9.95E-07  | 1.32E-05  |
| ENSG00000116574 | RHOU            | ras homolog family member U [Source:HGNC Symbol;Acc:HGNC:17794]                                                 | 400  | -0.5 | 0.10 | -5.52  | 3.45E-08  | 5.81E-07  |
| ENSG00000107242 | PIP5K1B         | phosphatidylinositol-4-phosphate 5-kinase type 1 beta [Source:HGNC Symbol;Acc:HGNC:8995]                        | 141  | -0.5 | 0.15 | -3.42  | 6.25E-04  | 0.0042523 |
| ENSG00000178038 | ALS2CL          | ALS2 C-terminal like [Source:HGNC Symbol;Acc:HGNC:20605]                                                        | 2355 | -0.5 | 0.05 | -10.90 | 1.11E-27  | 1.13E-25  |
| ENSG00000159921 | GNE             | glucosamine (UDP-N-acetyl)-2-epimerase/N-acetylmannosamine kinase [Source:HGNC Symbol;Acc:HGNC:2                | 1825 | -0.5 | 0.06 | -9.56  | 1.21E-21  | 8.04E-20  |
| ENSG00000153029 | MR1             | major histocompatibility complex, class I-related [Source:HGNC Symbol;Acc:HGNC:4975]                            | 283  | -0.5 | 0.12 | -4.56  | 5.20E-06  | 5.99E-05  |
| ENSG00000226067 | LINC00623       | long intergenic non-protein coding RNA 623 [Source:HGNC Symbol;Acc:HGNC:44252]                                  | 86   | -0.5 | 0.20 | -2.65  | 0.0081016 | 0.0362852 |
| ENSG00000124429 | POF1B           | POF1B actin binding protein [Source:HGNC Symbol;Acc:HGNC:13711]                                                 | 581  | -0.5 | 0.08 | -6.30  | 3.07E-10  | 7.00E-09  |
| ENSG00000228526 | MIR34AHG        | MIR34A host gene [Source:HGNC Symbol;Acc:HGNC:51913]                                                            | 277  | -0.5 | 0.12 | -4.46  | 8.10E-06  | 9.01E-05  |
| ENSG00000179023 | KLHDC7A         | kelch domain containing 7A [Source:HGNC Symbol;Acc:HGNC:26791]                                                  | 174  | -0.5 | 0.14 | -3.63  | 2.84E-04  | 0.0021292 |
| ENSG00000165168 | CYBB            | cytochrome b-245 beta chain [Source:HGNC Symbol;Acc:HGNC:2578]                                                  | 189  | -0.5 | 0.17 | -3.10  | 0.0019502 | 0.0111867 |
| ENSG00000224652 | LINC00885       | long intergenic non-protein coding RNA 885 [Source:HGNC Symbol;Acc:HGNC:48571]                                  | 144  | -0.5 | 0.16 | -3.33  | 8.55E-04  | 0.0055484 |
| ENSG00000171298 | GAA             | alpha glucosidase [Source:HGNC Symbol;Acc:HGNC:4065]                                                            | 893  | -0.5 | 0.07 | -7.70  | 1.38E-14  | 4.97E-13  |
| ENSG00000179981 | TSHZ1           | teashirt zinc finger homeobox 1 [Source:HGNC Symbol;Acc:HGNC:10669]                                             | 139  | -0.5 | 0.16 | -3.24  | 0.0011931 | 0.0073856 |
| ENSG00000081237 | PTPRC           | protein tyrosine phosphatase receptor type C [Source:HGNC Symbol;Acc:HGNC:9666]                                 | 126  | -0.5 | 0.17 | -3.01  | 0.002632  | 0.0144498 |
| ENSG00000091622 | PITPNM3         | PITPNM family member 3 [Source:HGNC Symbol;Acc:HGNC:21043]                                                      | 1043 | -0.5 | 0.06 | -8.36  | 6.30E-17  | 2.91E-15  |
| ENSG00000215845 | TSTD1           | thiosulfate sulfurtransferase like domain containing 1 [Source:HGNC Symbol;Acc:HGNC:35410]                      | 168  | -0.5 | 0.15 | -3.52  | 4.27E-04  | 0.0030509 |
| ENSG00000118257 | NRP2            | neuropilin 2 [Source:HGNC Symbol;Acc:HGNC:8005]                                                                 | 269  | -0.5 | 0.12 | -4.36  | 1.29E-05  | 1.36E-04  |
| ENSG00000117280 | RAB29           | RAB29, member RAS oncogene family [Source:HGNC Symbol;Acc:HGNC:9789]                                            | 438  | -0.5 | 0.09 | -5.71  | 1.15E-08  | 2.10E-07  |
| ENSG00000027001 | MIPEP           | mitochondrial intermediate peptidase [Source:HGNC Symbol;Acc:HGNC:7104]                                         | 288  | -0.5 | 0.11 | -4.69  | 2.67E-06  | 3.26E-05  |
| ENSG00000081479 | LRP2            | LDL receptor related protein 2 [Source:HGNC Symbol;Acc:HGNC:6694]                                               | 1375 | -0.5 | 0.06 | -9.14  | 6.46E-20  | 3.80E-18  |
| ENSG00000147872 | PLIN2           | perilipin 2 [Source:HGNC Symbol;Acc:HGNC:248]                                                                   | 1677 | -0.5 | 0.06 | -8.77  | 1.76E-18  | 9.17E-17  |
| ENSG00000186088 | GSAP            | gamma-secretase activating protein [Source:HGNC Symbol;Acc:HGNC:28042]                                          | 108  | -0.5 | 0.18 | -2.86  | 0.0042345 | 0.0213435 |
| ENSG00000115525 | ST3GAL5         | ST3 beta-galactoside alpha-2,3-sialyltransferase 5 [Source:HGNC Symbol;Acc:HGNC:10872]                          | 611  | -0.5 | 0.08 | -6.32  | 2.64E-10  | 6.08E-09  |
| ENSG00000183458 | PKD1P3          | polycystin 1, transient receptor potential channel interacting pseudogene 3 [Source:HGNC Symbol;Acc:HGNC:27455] | 150  | -0.5 | 0.17 | -3.00  | 0.0027108 | 0.0148238 |
| ENSG00000140465 | CYP1A1          | cytochrome P450 family 1 subfamily A member 1 [Source:HGNC Symbol;Acc:HGNC:2595]                                | 2191 | -0.5 | 0.05 | -10.63 | 2.15E-26  | 2.02E-24  |
| ENSG00000115594 | IL1R1           | interleukin 1 receptor type 1 [Source:HGNC Symbol;Acc:HGNC:5993]                                                | 1169 | -0.5 | 0.06 | -8.27  | 1.38E-16  | 6.17E-15  |
| ENSG00000280206 | ENSG00000280206 | novel transcript                                                                                                | 160  | -0.5 | 0.15 | -3.31  | 9.20E-04  | 0.0059131 |
| ENSG00000088305 | DNMT3B          | DNA methyltransferase 3 beta [Source:HGNC Symbol;Acc:HGNC:2979]                                                 | 2275 | -0.5 | 0.05 | -10.84 | 2.15E-27  | 2.15E-25  |
| ENSG00000185361 | TNFAIP8L1       | TNF alpha induced protein 8 like 1 [Source:HGNC Symbol;Acc:HGNC:28279]                                          | 233  | -0.5 | 0.13 | -4.01  | 5.97E-05  | 5.43E-04  |
| ENSG00000167771 | RCOR2           | REST corepressor 2 [Source:HGNC Symbol;Acc:HGNC:27455]                                                          | 118  | -0.5 | 0.17 | -2.96  | 0.0031108 | 0.016565  |
| ENSG00000196371 | FUT4            | fucosyltransferase 4 [Source:HGNC Symbol;Acc:HGNC:4015]                                                         | 297  | -0.5 | 0.11 | -4.46  | 8.27E-06  | 9.17E-05  |
| ENSG00000110455 | ACCS            | 1-aminocyclopropane-1-carboxylate synthase homolog (inactive) [Source:HGNC Symbol;Acc:HGNC:23989]               | 195  | -0.5 | 0.14 | -3.74  | 1.81E-04  | 0.0014345 |
| ENSG00000204219 | TCEA3           | transcription elongation factor A3 [Source:HGNC Symbol;Acc:HGNC:11615]                                          | 335  | -0.5 | 0.10 | -4.88  | 1.04E-06  | 1.37E-05  |
| ENSG00000144857 | BOC             | BOC cell adhesion associated, oncogene regulated [Source:HGNC Symbol;Acc:HGNC:17173]                            | 315  | -0.5 | 0.11 | -4.60  | 4.15E-06  | 4.87E-05  |
| ENSG00000163629 | PTPN13          | protein tyrosine phosphatase non-receptor type 13 [Source:HGNC Symbol;Acc:HGNC:9646]                            | 3423 | -0.5 | 0.04 | -12.40 | 2.75E-35  | 3.96E-33  |
| ENSG00000172020 | GAP43           | growth associated protein 43 [Source:HGNC Symbol;Acc:HGNC:4140]                                                 | 298  | -0.5 | 0.14 | -3.63  | 2.80E-04  | 0.0021063 |
| ENSG00000119514 | GALNT12         | polypeptide N-acetylgalactosaminyltransferase 12 [Source:HGNC Symbol;Acc:HGNC:19877]                            | 541  | -0.5 | 0.09 | -5.35  | 8.56E-08  | 1.36E-06  |

|                 |                 |                                                                                               |        |      |      |        |           |           |
|-----------------|-----------------|-----------------------------------------------------------------------------------------------|--------|------|------|--------|-----------|-----------|
| ENSG0000042493  | CAPG            | capping actin protein, gelsolin like [Source:HGNC Symbol;Acc:HGNC:1474]                       | 6288   | -0.5 | 0.04 | -12.67 | 8.95E-37  | 1.40E-34  |
| ENSG0000068079  | IFI35           | interferon induced protein 35 [Source:HGNC Symbol;Acc:HGNC:5399]                              | 1099   | -0.5 | 0.07 | -7.49  | 7.02E-14  | 2.43E-12  |
| ENSG0000007255  | TRAPPC6A        | trafficking protein particle complex 6A [Source:HGNC Symbol;Acc:HGNC:23069]                   | 531    | -0.5 | 0.09 | -5.74  | 9.31E-09  | 1.75E-07  |
| ENSG0000051523  | CYBA            | cytochrome b-245 alpha chain [Source:HGNC Symbol;Acc:HGNC:2577]                               | 281    | -0.5 | 0.13 | -3.79  | 1.48E-04  | 0.0012009 |
| ENSG00000186806 | VSIG10L         | V-set and immunoglobulin domain containing 10 like [Source:HGNC Symbol;Acc:HGNC:27111]        | 556    | -0.5 | 0.09 | -5.79  | 7.05E-09  | 1.34E-07  |
| ENSG00000179133 | C10orf67        | chromosome 10 open reading frame 67 [Source:HGNC Symbol;Acc:HGNC:28716]                       | 126    | 0.5  | 0.18 | 2.84   | 0.0045718 | 0.0227453 |
| ENSG00000101292 | PROKR2          | prokineticin receptor 2 [Source:HGNC Symbol;Acc:HGNC:15836]                                   | 100    | 0.5  | 0.19 | 2.68   | 0.0074135 | 0.0336617 |
| ENSG00000169469 | SPRR1B          | small proline rich protein 1B [Source:HGNC Symbol;Acc:HGNC:11260]                             | 1021   | 0.5  | 0.08 | 6.10   | 1.03E-09  | 2.20E-08  |
| ENSG00000075624 | ACTB            | actin beta [Source:HGNC Symbol;Acc:HGNC:132]                                                  | 176386 | 0.5  | 0.03 | 16.90  | 4.46E-64  | 2.48E-61  |
| ENSG00000235109 | ZSCAN31         | zinc finger and SCAN domain containing 31 [Source:HGNC Symbol;Acc:HGNC:14097]                 | 260    | 0.5  | 0.12 | 4.22   | 2.47E-05  | 2.47E-04  |
| ENSG00000171793 | CTPS1           | CTP synthase 1 [Source:HGNC Symbol;Acc:HGNC:2519]                                             | 10074  | 0.5  | 0.04 | 14.14  | 2.02E-45  | 5.70E-43  |
| ENSG00000019144 | PHLDB1          | pleckstrin homology like domain family B member 1 [Source:HGNC Symbol;Acc:HGNC:23697]         | 1133   | 0.5  | 0.06 | 8.31   | 9.60E-17  | 4.36E-15  |
| ENSG00000170017 | ALCAM           | activated leukocyte cell adhesion molecule [Source:HGNC Symbol;Acc:HGNC:400]                  | 277    | 0.5  | 0.12 | 4.27   | 1.94E-05  | 1.98E-04  |
| ENSG00000131016 | AKAP12          | A-kinase anchoring protein 12 [Source:HGNC Symbol;Acc:HGNC:370]                               | 263    | 0.5  | 0.13 | 3.88   | 1.04E-04  | 8.87E-04  |
| ENSG00000163069 | SGCB            | sarcoglycan beta [Source:HGNC Symbol;Acc:HGNC:10806]                                          | 1033   | 0.5  | 0.07 | 7.48   | 7.29E-14  | 2.51E-12  |
| ENSG00000145555 | MYO10           | myosin X [Source:HGNC Symbol;Acc:HGNC:7593]                                                   | 341    | 0.5  | 0.11 | 4.66   | 3.16E-06  | 3.82E-05  |
| ENSG00000172575 | RASGRP1         | RAS guanyl releasing protein 1 [Source:HGNC Symbol;Acc:HGNC:9878]                             | 608    | 0.5  | 0.08 | 6.16   | 7.51E-10  | 1.63E-08  |
| ENSG00000131188 | PRR7            | proline rich 7, synaptic [Source:HGNC Symbol;Acc:HGNC:28130]                                  | 108    | 0.5  | 0.19 | 2.68   | 0.0073015 | 0.0332276 |
| ENSG00000188677 | PARVB           | parvin beta [Source:HGNC Symbol;Acc:HGNC:14653]                                               | 150    | 0.5  | 0.16 | 3.23   | 0.001222  | 0.0075265 |
| ENSG00000240694 | PNMA2           | PNMA family member 2 [Source:HGNC Symbol;Acc:HGNC:9159]                                       | 167    | 0.5  | 0.15 | 3.48   | 5.04E-04  | 0.0035284 |
| ENSG00000177469 | CAVIN1          | caveolae associated protein 1 [Source:HGNC Symbol;Acc:HGNC:9688]                              | 19695  | 0.5  | 0.03 | 16.39  | 2.08E-60  | 9.88E-58  |
| ENSG00000137267 | TUBB2A          | tubulin beta 2A class IIa [Source:HGNC Symbol;Acc:HGNC:12412]                                 | 1471   | 0.5  | 0.07 | 7.58   | 3.48E-14  | 1.23E-12  |
| ENSG00000122591 | FAM126A         | family with sequence similarity 126 member A [Source:HGNC Symbol;Acc:HGNC:24587]              | 1900   | 0.5  | 0.05 | 9.89   | 4.41E-23  | 3.26E-21  |
| ENSG00000090339 | ICAM1           | intercellular adhesion molecule 1 [Source:HGNC Symbol;Acc:HGNC:5344]                          | 648    | 0.5  | 0.08 | 6.61   | 3.93E-11  | 1.02E-09  |
| ENSG00000182585 | EPGN            | epithelial mitogen [Source:HGNC Symbol;Acc:HGNC:17470]                                        | 3476   | 0.5  | 0.05 | 10.12  | 4.32E-24  | 3.38E-22  |
| ENSG00000152402 | GUCY1A2         | guanylate cyclase 1 soluble subunit alpha 2 [Source:HGNC Symbol;Acc:HGNC:4684]                | 156    | 0.5  | 0.15 | 3.38   | 7.17E-04  | 0.0047771 |
| ENSG00000138399 | FASTKD1         | FAST kinase domains 1 [Source:HGNC Symbol;Acc:HGNC:26150]                                     | 303    | 0.5  | 0.11 | 4.46   | 8.07E-06  | 8.99E-05  |
| ENSG00000186297 | GABRA5          | gamma-aminobutyric acid type A receptor subunit alpha5 [Source:HGNC Symbol;Acc:HGNC:4079]     | 482    | 0.5  | 0.09 | 5.85   | 4.80E-09  | 9.34E-08  |
| ENSG00000035403 | VCL             | vinculin [Source:HGNC Symbol;Acc:HGNC:12665]                                                  | 5524   | 0.5  | 0.03 | 14.69  | 7.24E-49  | 2.43E-46  |
| ENSG00000034152 | MAP2K3          | mitogen-activated protein kinase kinase 3 [Source:HGNC Symbol;Acc:HGNC:6843]                  | 1106   | 0.5  | 0.06 | 8.28   | 1.19E-16  | 5.40E-15  |
| ENSG00000150907 | FOXO1           | forkhead box O1 [Source:HGNC Symbol;Acc:HGNC:3819]                                            | 139    | 0.5  | 0.16 | 3.15   | 0.0016189 | 0.0095518 |
| ENSG00000090932 | DLL3            | delta like canonical Notch ligand 3 [Source:HGNC Symbol;Acc:HGNC:2909]                        | 258    | 0.5  | 0.14 | 3.77   | 1.66E-04  | 0.0013355 |
| ENSG00000120217 | CD274           | CD274 molecule [Source:HGNC Symbol;Acc:HGNC:17635]                                            | 413    | 0.5  | 0.10 | 4.96   | 7.00E-07  | 9.48E-06  |
| ENSG00000163638 | ADAMT59         | ADAM metalloproteinase with thrombospondin type 1 motif 9 [Source:HGNC Symbol;Acc:HGNC:13202] | 1991   | 0.5  | 0.05 | 10.61  | 2.60E-26  | 2.42E-24  |
| ENSG00000100504 | PYGL            | glycogen phosphorylase L [Source:HGNC Symbol;Acc:HGNC:9725]                                   | 4562   | 0.5  | 0.04 | 14.01  | 1.33E-44  | 3.63E-42  |
| ENSG00000164823 | OSGIN2          | oxidative stress induced growth inhibitor family member 2 [Source:HGNC Symbol;Acc:HGNC:1355]  | 1088   | 0.5  | 0.07 | 7.74   | 1.03E-14  | 3.75E-13  |
| ENSG00000127920 | GNG11           | G protein subunit gamma 11 [Source:HGNC Symbol;Acc:HGNC:4403]                                 | 527    | 0.5  | 0.09 | 5.98   | 2.20E-09  | 4.52E-08  |
| ENSG00000154917 | RAB6B           | RAB6B, member RAS oncogene family [Source:HGNC Symbol;Acc:HGNC:14902]                         | 415    | 0.5  | 0.10 | 5.37   | 7.90E-08  | 1.26E-06  |
| ENSG00000236751 | LINC01186       | long intergenic non-protein coding RNA 1186 [Source:HGNC Symbol;Acc:HGNC:49573]               | 93     | 0.5  | 0.19 | 2.68   | 0.0073366 | 0.0333501 |
| ENSG00000142875 | PRKACB          | protein kinase cAMP-activated catalytic subunit beta [Source:HGNC Symbol;Acc:HGNC:9381]       | 535    | 0.5  | 0.09 | 6.05   | 1.48E-09  | 3.09E-08  |
| ENSG00000157227 | MMP14           | matrix metalloproteinase 14 [Source:HGNC Symbol;Acc:HGNC:7160]                                | 2947   | 0.5  | 0.05 | 10.98  | 4.83E-28  | 5.03E-26  |
| ENSG00000251136 | ENSG00000251136 | novel transcript                                                                              | 351    | 0.5  | 0.11 | 4.89   | 1.01E-06  | 1.33E-05  |

|                 |                 |                                                                                                          |       |     |      |       |           |           |
|-----------------|-----------------|----------------------------------------------------------------------------------------------------------|-------|-----|------|-------|-----------|-----------|
| ENSG00000186481 | ANKRD20A5P      | ankyrin repeat domain 20 family member A5, pseudogene [Source:HGNC Symbol;Acc:HGNC:33833]                | 147   | 0.5 | 0.15 | 3.38  | 7.18E-04  | 0.0047774 |
| ENSG00000152127 | MGAT5           | alpha-1,6-mannosylglycoprotein 6-beta-N-acetylglucosaminyltransferase [Source:HGNC Symbol;Acc:HGNC:1299] | 1299  | 0.5 | 0.06 | 8.19  | 2.71E-16  | 1.17E-14  |
| ENSG00000155760 | FZD7            | frizzled class receptor 7 [Source:HGNC Symbol;Acc:HGNC:4045]                                             | 910   | 0.5 | 0.07 | 7.44  | 9.90E-14  | 3.35E-12  |
| ENSG00000137449 | CPEB2           | cytoplasmic polyadenylation element binding protein 2 [Source:HGNC Symbol;Acc:HGNC:21745]                | 300   | 0.5 | 0.12 | 4.50  | 6.87E-06  | 7.75E-05  |
| ENSG00000167657 | DAPK3           | death associated protein kinase 3 [Source:HGNC Symbol;Acc:HGNC:2676]                                     | 1648  | 0.5 | 0.06 | 8.81  | 1.29E-18  | 6.84E-17  |
| ENSG00000162105 | SHANK2          | SH3 and multiple ankyrin repeat domains 2 [Source:HGNC Symbol;Acc:HGNC:14295]                            | 444   | 0.5 | 0.09 | 5.83  | 5.55E-09  | 1.07E-07  |
| ENSG00000147119 | CHST7           | carbohydrate sulfotransferase 7 [Source:HGNC Symbol;Acc:HGNC:13817]                                      | 231   | 0.5 | 0.15 | 3.40  | 6.83E-04  | 0.0045767 |
| ENSG00000101665 | SMAD7           | SMAD family member 7 [Source:HGNC Symbol;Acc:HGNC:6773]                                                  | 1005  | 0.5 | 0.07 | 7.92  | 2.31E-15  | 9.17E-14  |
| ENSG00000232759 | ENSG00000232759 | novel transcript, antisense to STEAP1B                                                                   | 208   | 0.5 | 0.13 | 3.97  | 7.22E-05  | 6.42E-04  |
| ENSG00000213949 | ITGA1           | integrin subunit alpha 1 [Source:HGNC Symbol;Acc:HGNC:6134]                                              | 997   | 0.5 | 0.06 | 8.10  | 5.35E-16  | 2.28E-14  |
| ENSG00000105339 | DENND3          | DENN domain containing 3 [Source:HGNC Symbol;Acc:HGNC:29134]                                             | 889   | 0.5 | 0.08 | 6.61  | 3.93E-11  | 1.02E-09  |
| ENSG00000106031 | HOXA13          | homeobox A13 [Source:HGNC Symbol;Acc:HGNC:5102]                                                          | 105   | 0.5 | 0.19 | 2.85  | 0.0043524 | 0.0218488 |
| ENSG00000275993 | SIK1B           | salt inducible kinase 1B (putative) [Source:HGNC Symbol;Acc:HGNC:52389]                                  | 337   | 0.5 | 0.11 | 4.79  | 1.71E-06  | 2.17E-05  |
| ENSG00000073008 | PVR             | PVR cell adhesion molecule [Source:HGNC Symbol;Acc:HGNC:9705]                                            | 5951  | 0.5 | 0.04 | 14.59 | 3.10E-48  | 9.62E-46  |
| ENSG00000128683 | GAD1            | glutamate decarboxylase 1 [Source:HGNC Symbol;Acc:HGNC:4092]                                             | 289   | 0.5 | 0.11 | 4.75  | 2.05E-06  | 2.56E-05  |
| ENSG00000138448 | ITGAV           | integrin subunit alpha V [Source:HGNC Symbol;Acc:HGNC:6150]                                              | 7907  | 0.5 | 0.04 | 14.46 | 2.26E-47  | 6.62E-45  |
| ENSG00000154127 | UBASH3B         | ubiquitin associated and SH3 domain containing B [Source:HGNC Symbol;Acc:HGNC:29884]                     | 257   | 0.5 | 0.12 | 4.46  | 8.26E-06  | 9.15E-05  |
| ENSG00000164125 | GASK1B          | golgi associated kinase 1B [Source:HGNC Symbol;Acc:HGNC:25312]                                           | 999   | 0.5 | 0.08 | 6.88  | 5.98E-12  | 1.71E-10  |
| ENSG00000196924 | FLNA            | filamin A [Source:HGNC Symbol;Acc:HGNC:3754]                                                             | 39812 | 0.5 | 0.03 | 16.97 | 1.48E-64  | 8.85E-62  |
| ENSG00000105329 | TGFB1           | transforming growth factor beta 1 [Source:HGNC Symbol;Acc:HGNC:11766]                                    | 1363  | 0.5 | 0.06 | 8.93  | 4.13E-19  | 2.23E-17  |
| ENSG00000126603 | GLIS2           | GLIS family zinc finger 2 [Source:HGNC Symbol;Acc:HGNC:29450]                                            | 95    | 0.5 | 0.21 | 2.59  | 0.0096834 | 0.041869  |
| ENSG00000197860 | SGTB            | small glutamine rich tetratricopeptide repeat containing beta [Source:HGNC Symbol;Acc:HGNC:23567]        | 129   | 0.5 | 0.16 | 3.31  | 9.17E-04  | 0.0058957 |
| ENSG00000124788 | ATXN1           | ataxin 1 [Source:HGNC Symbol;Acc:HGNC:10548]                                                             | 1733  | 0.5 | 0.05 | 10.27 | 9.35E-25  | 7.61E-23  |
| ENSG00000144959 | NCEH1           | neutral cholesterol ester hydrolase 1 [Source:HGNC Symbol;Acc:HGNC:29260]                                | 1167  | 0.5 | 0.06 | 8.96  | 3.13E-19  | 1.72E-17  |
| ENSG00000112893 | MAN2A1          | mannosidase alpha class 2A member 1 [Source:HGNC Symbol;Acc:HGNC:6824]                                   | 2010  | 0.5 | 0.06 | 8.64  | 5.65E-18  | 2.81E-16  |
| ENSG00000134352 | IL6ST           | interleukin 6 signal transducer [Source:HGNC Symbol;Acc:HGNC:6021]                                       | 1906  | 0.5 | 0.06 | 8.84  | 9.55E-19  | 5.11E-17  |
| ENSG00000248383 | PCDHAC1         | protocadherin alpha subfamily C, 1 [Source:HGNC Symbol;Acc:HGNC:8676]                                    | 88    | 0.5 | 0.20 | 2.71  | 0.0068024 | 0.0313999 |
| ENSG00000185760 | KCNQ5           | potassium voltage-gated channel subfamily Q member 5 [Source:HGNC Symbol;Acc:HGNC:6299]                  | 115   | 0.5 | 0.18 | 2.98  | 0.0028785 | 0.0155911 |
| ENSG00000117143 | UAP1            | UDP-N-acetylglucosamine pyrophosphorylase 1 [Source:HGNC Symbol;Acc:HGNC:12457]                          | 1853  | 0.5 | 0.05 | 10.68 | 1.29E-26  | 1.22E-24  |
| ENSG00000102908 | NFAT5           | nuclear factor of activated T cells 5 [Source:HGNC Symbol;Acc:HGNC:7774]                                 | 1213  | 0.5 | 0.07 | 7.91  | 2.58E-15  | 1.02E-13  |
| ENSG00000158825 | CDA             | cytidine deaminase [Source:HGNC Symbol;Acc:HGNC:1712]                                                    | 1005  | 0.5 | 0.07 | 8.24  | 1.71E-16  | 7.60E-15  |
| ENSG00000229689 | ENSG00000229689 | Ankyrin repeat domain-containing protein pseudogene                                                      | 143   | 0.5 | 0.16 | 3.46  | 5.35E-04  | 0.003716  |
| ENSG00000196639 | HRH1            | histamine receptor H1 [Source:HGNC Symbol;Acc:HGNC:5182]                                                 | 159   | 0.5 | 0.15 | 3.68  | 2.31E-04  | 0.0017832 |
| ENSG00000090924 | PLEKHG2         | pleckstrin homology and RhoGEF domain containing G2 [Source:HGNC Symbol;Acc:HGNC:29515]                  | 864   | 0.5 | 0.07 | 8.04  | 8.80E-16  | 3.67E-14  |
| ENSG00000148484 | RSU1            | Ras suppressor protein 1 [Source:HGNC Symbol;Acc:HGNC:10464]                                             | 1058  | 0.5 | 0.07 | 8.22  | 2.11E-16  | 9.26E-15  |
| ENSG00000146232 | NFKBIE          | NFKB inhibitor epsilon [Source:HGNC Symbol;Acc:HGNC:7799]                                                | 252   | 0.5 | 0.14 | 3.87  | 1.09E-04  | 9.20E-04  |
| ENSG00000070190 | DAPP1           | dual adaptor of phosphotyrosine and 3-phosphoinositides 1 [Source:HGNC Symbol;Acc:HGNC:16500]            | 1537  | 0.5 | 0.05 | 10.30 | 6.92E-25  | 5.69E-23  |
| ENSG00000063587 | ZNF275          | zinc finger protein 275 [Source:HGNC Symbol;Acc:HGNC:13069]                                              | 104   | 0.5 | 0.19 | 2.96  | 0.0030946 | 0.016506  |
| ENSG00000225206 | MIR137HG        | MIR137 host gene [Source:HGNC Symbol;Acc:HGNC:42871]                                                     | 179   | 0.5 | 0.15 | 3.75  | 1.80E-04  | 0.0014318 |
| ENSG00000196754 | S100A2          | S100 calcium binding protein A2 [Source:HGNC Symbol;Acc:HGNC:10492]                                      | 980   | 0.6 | 0.08 | 7.19  | 6.26E-13  | 1.95E-11  |
| ENSG00000133477 | FAM83F          | family with sequence similarity 83 member F [Source:HGNC Symbol;Acc:HGNC:25148]                          | 101   | 0.6 | 0.20 | 2.73  | 0.0062634 | 0.0293234 |
| ENSG00000261786 | ENSG00000261786 | novel transcript                                                                                         | 160   | 0.6 | 0.15 | 3.57  | 3.53E-04  | 0.0025722 |

|                 |                 |                                                                                                            |       |     |      |       |           |           |
|-----------------|-----------------|------------------------------------------------------------------------------------------------------------|-------|-----|------|-------|-----------|-----------|
| ENSG00000268119 | ENSG00000268119 | novel transcript                                                                                           | 149   | 0.6 | 0.15 | 3.61  | 3.08E-04  | 0.0022881 |
| ENSG00000166105 | GLB1L3          | galactosidase beta 1 like 3 [Source:HGNC Symbol;Acc:HGNC:25147]                                            | 390   | 0.6 | 0.10 | 5.37  | 7.84E-08  | 1.26E-06  |
| ENSG00000151623 | NR3C2           | nuclear receptor subfamily 3 group C member 2 [Source:HGNC Symbol;Acc:HGNC:7979]                           | 132   | 0.6 | 0.16 | 3.40  | 6.84E-04  | 0.00458   |
| ENSG00000127603 | MACF1           | microtubule actin crosslinking factor 1 [Source:HGNC Symbol;Acc:HGNC:13664]                                | 6389  | 0.6 | 0.04 | 13.57 | 6.39E-42  | 1.37E-39  |
| ENSG00000229544 | NKX1-2          | NK1 homeobox 2 [Source:HGNC Symbol;Acc:HGNC:31652]                                                         | 268   | 0.6 | 0.12 | 4.53  | 6.03E-06  | 6.90E-05  |
| ENSG00000073060 | SCARB1          | scavenger receptor class B member 1 [Source:HGNC Symbol;Acc:HGNC:1664]                                     | 848   | 0.6 | 0.08 | 7.02  | 2.20E-12  | 6.49E-11  |
| ENSG00000118495 | PLAGL1          | PLAG1 like zinc finger 1 [Source:HGNC Symbol;Acc:HGNC:9046]                                                | 555   | 0.6 | 0.09 | 6.43  | 1.25E-10  | 3.03E-09  |
| ENSG00000153233 | PTPRR           | protein tyrosine phosphatase receptor type R [Source:HGNC Symbol;Acc:HGNC:9680]                            | 86    | 0.6 | 0.21 | 2.69  | 0.0072374 | 0.0329735 |
| ENSG00000113742 | CPEB4           | cytoplasmic polyadenylation element binding protein 4 [Source:HGNC Symbol;Acc:HGNC:21747]                  | 1154  | 0.6 | 0.07 | 8.21  | 2.20E-16  | 9.64E-15  |
| ENSG00000224078 | SNHG14          | small nucleolar RNA host gene 14 [Source:HGNC Symbol;Acc:HGNC:37462]                                       | 2182  | 0.6 | 0.05 | 11.97 | 5.22E-33  | 6.90E-31  |
| ENSG00000128849 | CGNL1           | cingulin like 1 [Source:HGNC Symbol;Acc:HGNC:25931]                                                        | 168   | 0.6 | 0.15 | 3.66  | 2.55E-04  | 0.0019396 |
| ENSG00000107105 | ELAVL2          | ELAV like RNA binding protein 2 [Source:HGNC Symbol;Acc:HGNC:3313]                                         | 681   | 0.6 | 0.08 | 6.77  | 1.28E-11  | 3.53E-10  |
| ENSG00000070404 | FSTL3           | folliculin like 3 [Source:HGNC Symbol;Acc:HGNC:3973]                                                       | 3210  | 0.6 | 0.04 | 13.56 | 7.21E-42  | 1.53E-39  |
| ENSG00000179292 | TMEM151A        | transmembrane protein 151A [Source:HGNC Symbol;Acc:HGNC:28497]                                             | 201   | 0.6 | 0.14 | 4.02  | 5.71E-05  | 5.22E-04  |
| ENSG00000137331 | IER3            | immediate early response 3 [Source:HGNC Symbol;Acc:HGNC:5392]                                              | 297   | 0.6 | 0.12 | 4.71  | 2.43E-06  | 2.99E-05  |
| ENSG00000234840 | LINC01239       | long intergenic non-protein coding RNA 1239 [Source:HGNC Symbol;Acc:HGNC:49796]                            | 97    | 0.6 | 0.19 | 3.00  | 0.0027343 | 0.0149202 |
| ENSG00000147224 | PRPS1           | phosphoribosyl pyrophosphate synthetase 1 [Source:HGNC Symbol;Acc:HGNC:9462]                               | 2187  | 0.6 | 0.05 | 11.83 | 2.71E-32  | 3.31E-30  |
| ENSG00000184009 | ACTG1           | actin gamma 1 [Source:HGNC Symbol;Acc:HGNC:144]                                                            | 72267 | 0.6 | 0.03 | 17.93 | 6.37E-72  | 3.95E-69  |
| ENSG00000155980 | KIF5A           | kinesin family member 5A [Source:HGNC Symbol;Acc:HGNC:6323]                                                | 230   | 0.6 | 0.16 | 3.63  | 2.87E-04  | 0.0021491 |
| ENSG00000251003 | ZFPM2-AS1       | ZFPM2 antisense RNA 1 [Source:HGNC Symbol;Acc:HGNC:50698]                                                  | 156   | 0.6 | 0.15 | 3.71  | 2.07E-04  | 0.0016139 |
| ENSG00000158163 | DZIP1L          | DAZ interacting zinc finger protein 1 like [Source:HGNC Symbol;Acc:HGNC:26551]                             | 108   | 0.6 | 0.18 | 3.19  | 0.0014012 | 0.0084341 |
| ENSG00000106070 | GRB10           | growth factor receptor bound protein 10 [Source:HGNC Symbol;Acc:HGNC:4564]                                 | 116   | 0.6 | 0.18 | 3.13  | 0.0017325 | 0.0101091 |
| ENSG00000072110 | ACTN1           | actinin alpha 1 [Source:HGNC Symbol;Acc:HGNC:163]                                                          | 10343 | 0.6 | 0.05 | 12.63 | 1.41E-36  | 2.18E-34  |
| ENSG00000164086 | DUSP7           | dual specificity phosphatase 7 [Source:HGNC Symbol;Acc:HGNC:3073]                                          | 630   | 0.6 | 0.08 | 7.28  | 3.26E-13  | 1.07E-11  |
| ENSG00000138311 | ZNF365          | zinc finger protein 365 [Source:HGNC Symbol;Acc:HGNC:18194]                                                | 162   | 0.6 | 0.16 | 3.71  | 2.08E-04  | 0.0016264 |
| ENSG00000119771 | KLHL29          | kelch like family member 29 [Source:HGNC Symbol;Acc:HGNC:29404]                                            | 154   | 0.6 | 0.15 | 3.87  | 1.11E-04  | 9.35E-04  |
| ENSG00000156113 | KCNMA1          | potassium calcium-activated channel subfamily M alpha 1 [Source:HGNC Symbol;Acc:HGNC:6284]                 | 1274  | 0.6 | 0.06 | 9.64  | 5.61E-22  | 3.90E-20  |
| ENSG00000213763 | ACTBP2          | ACTB pseudogene 2 [Source:HGNC Symbol;Acc:HGNC:135]                                                        | 99    | 0.6 | 0.19 | 2.99  | 0.0027869 | 0.0151608 |
| ENSG00000203668 | CHML            | CHM like Rab escort protein [Source:HGNC Symbol;Acc:HGNC:1941]                                             | 2194  | 0.6 | 0.05 | 10.77 | 4.97E-27  | 4.82E-25  |
| ENSG00000125257 | ABCC4           | ATP binding cassette subfamily C member 4 [Source:HGNC Symbol;Acc:HGNC:55]                                 | 198   | 0.6 | 0.16 | 3.63  | 2.82E-04  | 0.0021157 |
| ENSG00000153814 | JAZF1           | JAZF zinc finger 1 [Source:HGNC Symbol;Acc:HGNC:28917]                                                     | 183   | 0.6 | 0.15 | 3.91  | 9.27E-05  | 8.03E-04  |
| ENSG00000275216 | ENSG00000275216 | novel transcript                                                                                           | 1996  | 0.6 | 0.05 | 12.01 | 3.34E-33  | 4.45E-31  |
| ENSG00000151715 | TMEM45B         | transmembrane protein 45B [Source:HGNC Symbol;Acc:HGNC:25194]                                              | 81    | 0.6 | 0.21 | 2.76  | 0.0057311 | 0.0272666 |
| ENSG00000278709 | NKILA           | NF-kappaB interacting lncRNA [Source:HGNC Symbol;Acc:HGNC:51599]                                           | 198   | 0.6 | 0.13 | 4.42  | 9.80E-06  | 1.07E-04  |
| ENSG00000157404 | KIT             | KIT proto-oncogene, receptor tyrosine kinase [Source:HGNC Symbol;Acc:HGNC:6342]                            | 882   | 0.6 | 0.07 | 8.49  | 2.09E-17  | 9.99E-16  |
| ENSG00000073712 | FERMT2          | fermitin family member 2 [Source:HGNC Symbol;Acc:HGNC:15767]                                               | 2733  | 0.6 | 0.04 | 13.23 | 5.53E-40  | 1.02E-37  |
| ENSG00000101096 | NFATC2          | nuclear factor of activated T cells 2 [Source:HGNC Symbol;Acc:HGNC:7776]                                   | 1436  | 0.6 | 0.06 | 9.40  | 5.63E-21  | 3.58E-19  |
| ENSG00000148468 | FAM171A1        | family with sequence similarity 171 member A1 [Source:HGNC Symbol;Acc:HGNC:23522]                          | 498   | 0.6 | 0.09 | 6.61  | 3.76E-11  | 9.81E-10  |
| ENSG00000145901 | TNIP1           | TNFAIP3 interacting protein 1 [Source:HGNC Symbol;Acc:HGNC:16903]                                          | 2228  | 0.6 | 0.05 | 11.63 | 2.82E-31  | 3.32E-29  |
| ENSG00000198838 | RYR3            | ryanodine receptor 3 [Source:HGNC Symbol;Acc:HGNC:10485]                                                   | 67    | 0.6 | 0.23 | 2.61  | 0.0089782 | 0.0395515 |
| ENSG00000212907 | MT-ND4L         | mitochondrially encoded NADH:ubiquinone oxidoreductase core subunit 4L [Source:HGNC Symbol;Acc:HGNC:11616] | 9064  | 0.6 | 0.19 | 3.14  | 0.0016854 | 0.0098754 |
| ENSG00000172465 | TCEAL1          | transcription elongation factor A like 1 [Source:HGNC Symbol;Acc:HGNC:11616]                               | 287   | 0.6 | 0.11 | 5.34  | 9.45E-08  | 1.49E-06  |

|                 |           |                                                                                                    |      |     |      |       |           |           |
|-----------------|-----------|----------------------------------------------------------------------------------------------------|------|-----|------|-------|-----------|-----------|
| ENSG00000173391 | OLR1      | oxidized low density lipoprotein receptor 1 [Source:HGNC Symbol;Acc:HGNC:8133]                     | 1770 | 0.6 | 0.06 | 10.37 | 3.31E-25  | 2.79E-23  |
| ENSG00000153531 | ADPRHL1   | ADP-ribosylhydrolase like 1 [Source:HGNC Symbol;Acc:HGNC:21303]                                    | 394  | 0.6 | 0.10 | 5.97  | 2.36E-09  | 4.79E-08  |
| ENSG00000173227 | SYT12     | synaptotagmin 12 [Source:HGNC Symbol;Acc:HGNC:18381]                                               | 88   | 0.6 | 0.21 | 2.85  | 0.0044337 | 0.0221877 |
| ENSG00000155918 | RAET1L    | retinoic acid early transcript 1L [Source:HGNC Symbol;Acc:HGNC:16798]                              | 75   | 0.6 | 0.21 | 2.78  | 0.0054626 | 0.0261826 |
| ENSG00000162444 | RBP7      | retinol binding protein 7 [Source:HGNC Symbol;Acc:HGNC:30316]                                      | 1089 | 0.6 | 0.07 | 8.45  | 3.03E-17  | 1.42E-15  |
| ENSG00000132334 | PTPRE     | protein tyrosine phosphatase receptor type E [Source:HGNC Symbol;Acc:HGNC:9669]                    | 395  | 0.6 | 0.10 | 6.04  | 1.50E-09  | 3.12E-08  |
| ENSG00000039560 | RAI14     | retinoic acid induced 14 [Source:HGNC Symbol;Acc:HGNC:14873]                                       | 290  | 0.6 | 0.11 | 5.32  | 1.06E-07  | 1.67E-06  |
| ENSG00000197763 | TXNRD3    | thioredoxin reductase 3 [Source:HGNC Symbol;Acc:HGNC:20667]                                        | 243  | 0.6 | 0.13 | 4.74  | 2.10E-06  | 2.62E-05  |
| ENSG00000196739 | COL27A1   | collagen type XXVII alpha 1 chain [Source:HGNC Symbol;Acc:HGNC:22986]                              | 131  | 0.6 | 0.17 | 3.53  | 4.21E-04  | 0.0030164 |
| ENSG00000177606 | JUN       | Jun proto-oncogene, AP-1 transcription factor subunit [Source:HGNC Symbol;Acc:HGNC:6204]           | 4291 | 0.6 | 0.05 | 11.84 | 2.44E-32  | 3.00E-30  |
| ENSG00000228649 | SNHG26    | small nucleolar RNA host gene 26 [Source:HGNC Symbol;Acc:HGNC:53131]                               | 237  | 0.6 | 0.13 | 4.76  | 1.96E-06  | 2.46E-05  |
| ENSG00000248323 | LUCAT1    | lung cancer associated transcript 1 [Source:HGNC Symbol;Acc:HGNC:48498]                            | 179  | 0.6 | 0.14 | 4.32  | 1.53E-05  | 1.59E-04  |
| ENSG00000163545 | NUAK2     | NUAK family kinase 2 [Source:HGNC Symbol;Acc:HGNC:29558]                                           | 502  | 0.6 | 0.10 | 6.37  | 1.93E-10  | 4.59E-09  |
| ENSG00000087128 | TMPRSS11E | transmembrane serine protease 11E [Source:HGNC Symbol;Acc:HGNC:24465]                              | 611  | 0.6 | 0.08 | 7.40  | 1.39E-13  | 4.68E-12  |
| ENSG00000100121 | GGTLC2    | gamma-glutamyltransferase light chain 2 [Source:HGNC Symbol;Acc:HGNC:18596]                        | 67   | 0.6 | 0.23 | 2.62  | 0.0088565 | 0.0391549 |
| ENSG00000069188 | SDK2      | sidekick cell adhesion molecule 2 [Source:HGNC Symbol;Acc:HGNC:19308]                              | 103  | 0.6 | 0.18 | 3.35  | 7.97E-04  | 0.0052357 |
| ENSG00000198833 | UBE2J1    | ubiquitin conjugating enzyme E2 J1 [Source:HGNC Symbol;Acc:HGNC:17598]                             | 4095 | 0.6 | 0.04 | 15.50 | 3.48E-54  | 1.37E-51  |
| ENSG00000172403 | SYNPO2    | synaptopodin 2 [Source:HGNC Symbol;Acc:HGNC:17732]                                                 | 322  | 0.6 | 0.11 | 5.51  | 3.54E-08  | 5.95E-07  |
| ENSG00000148841 | ITPRIP    | inositol 1,4,5-trisphosphate receptor interacting protein [Source:HGNC Symbol;Acc:HGNC:29370]      | 132  | 0.6 | 0.16 | 3.77  | 1.65E-04  | 0.0013274 |
| ENSG00000171488 | LRRRC8C   | leucine rich repeat containing 8 VRAC subunit C [Source:HGNC Symbol;Acc:HGNC:25075]                | 113  | 0.6 | 0.18 | 3.47  | 5.12E-04  | 0.0035763 |
| ENSG00000148483 | TMEM236   | transmembrane protein 236 [Source:HGNC Symbol;Acc:HGNC:23473]                                      | 217  | 0.6 | 0.13 | 4.60  | 4.18E-06  | 4.90E-05  |
| ENSG00000152952 | PLOD2     | procollagen-lysine,2-oxoglutarate 5-dioxygenase 2 [Source:HGNC Symbol;Acc:HGNC:9082]               | 2797 | 0.6 | 0.04 | 13.86 | 1.10E-43  | 2.81E-41  |
| ENSG00000122786 | CALD1     | caldesmon 1 [Source:HGNC Symbol;Acc:HGNC:1441]                                                     | 8013 | 0.6 | 0.03 | 18.15 | 1.31E-73  | 8.77E-71  |
| ENSG00000130962 | PRRG1     | proline rich and Gla domain 1 [Source:HGNC Symbol;Acc:HGNC:9469]                                   | 393  | 0.6 | 0.10 | 6.35  | 2.16E-10  | 5.07E-09  |
| ENSG00000138685 | FGF2      | fibroblast growth factor 2 [Source:HGNC Symbol;Acc:HGNC:3676]                                      | 634  | 0.6 | 0.08 | 7.76  | 8.25E-15  | 3.08E-13  |
| ENSG00000187957 | DNER      | delta/notch like EGF repeat containing [Source:HGNC Symbol;Acc:HGNC:24456]                         | 333  | 0.6 | 0.11 | 5.72  | 1.05E-08  | 1.94E-07  |
| ENSG00000047634 | SCML1     | Scm polycomb group protein like 1 [Source:HGNC Symbol;Acc:HGNC:10580]                              | 89   | 0.6 | 0.21 | 2.98  | 0.0028379 | 0.0153988 |
| ENSG00000164619 | BMPER     | BMP binding endothelial regulator [Source:HGNC Symbol;Acc:HGNC:24154]                              | 84   | 0.6 | 0.20 | 3.03  | 0.0024194 | 0.0134662 |
| ENSG00000170390 | DCLK2     | doublecortin like kinase 2 [Source:HGNC Symbol;Acc:HGNC:19002]                                     | 395  | 0.6 | 0.10 | 6.18  | 6.56E-10  | 1.44E-08  |
| ENSG00000137941 | TTL7      | tubulin tyrosine ligase like 7 [Source:HGNC Symbol;Acc:HGNC:26242]                                 | 332  | 0.6 | 0.11 | 5.64  | 1.72E-08  | 3.07E-07  |
| ENSG00000175602 | CCDC85B   | coiled-coil domain containing 85B [Source:HGNC Symbol;Acc:HGNC:24926]                              | 2255 | 0.6 | 0.18 | 3.35  | 8.00E-04  | 0.0052502 |
| ENSG00000237515 | SHISA9    | shisa family member 9 [Source:HGNC Symbol;Acc:HGNC:37231]                                          | 429  | 0.6 | 0.10 | 6.31  | 2.70E-10  | 6.22E-09  |
| ENSG00000031081 | ARHGAP31  | Rho GTPase activating protein 31 [Source:HGNC Symbol;Acc:HGNC:29216]                               | 325  | 0.6 | 0.11 | 5.49  | 4.00E-08  | 6.67E-07  |
| ENSG00000145012 | LPP       | LIM domain containing preferred translocation partner in lipoma [Source:HGNC Symbol;Acc:HGNC:6679] | 1304 | 0.6 | 0.06 | 10.49 | 9.45E-26  | 8.42E-24  |
| ENSG00000171951 | SCG2      | secretogranin II [Source:HGNC Symbol;Acc:HGNC:10575]                                               | 110  | 0.6 | 0.18 | 3.41  | 6.40E-04  | 0.004334  |
| ENSG00000136052 | SLC41A2   | solute carrier family 41 member 2 [Source:HGNC Symbol;Acc:HGNC:31045]                              | 323  | 0.6 | 0.11 | 5.73  | 9.75E-09  | 1.82E-07  |
| ENSG00000117525 | F3        | coagulation factor III, tissue factor [Source:HGNC Symbol;Acc:HGNC:3541]                           | 3091 | 0.6 | 0.04 | 15.11 | 1.48E-51  | 5.20E-49  |
| ENSG00000062582 | MRPS24    | mitochondrial ribosomal protein S24 [Source:HGNC Symbol;Acc:HGNC:14510]                            | 114  | 0.6 | 0.18 | 3.59  | 3.29E-04  | 0.0024233 |
| ENSG00000099250 | NRP1      | neuropilin 1 [Source:HGNC Symbol;Acc:HGNC:8004]                                                    | 220  | 0.6 | 0.13 | 4.73  | 2.27E-06  | 2.82E-05  |
| ENSG00000104219 | ZDHHC2    | zinc finger DHHC-type palmitoyltransferase 2 [Source:HGNC Symbol;Acc:HGNC:18469]                   | 214  | 0.6 | 0.13 | 4.69  | 2.70E-06  | 3.29E-05  |
| ENSG00000135631 | RAB11FIP5 | RAB11 family interacting protein 5 [Source:HGNC Symbol;Acc:HGNC:24845]                             | 1477 | 0.6 | 0.06 | 11.31 | 1.12E-29  | 1.25E-27  |
| ENSG00000137142 | IGFBPL1   | insulin like growth factor binding protein like 1 [Source:HGNC Symbol;Acc:HGNC:20081]              | 152  | 0.6 | 0.16 | 4.05  | 5.12E-05  | 4.74E-04  |

|                 |                 |                                                                                                        |      |     |      |       |           |           |
|-----------------|-----------------|--------------------------------------------------------------------------------------------------------|------|-----|------|-------|-----------|-----------|
| ENSG00000137285 | TUBB2B          | tubulin beta 2B class IIb [Source:HGNC Symbol;Acc:HGNC:30829]                                          | 740  | 0.6 | 0.09 | 7.37  | 1.72E-13  | 5.73E-12  |
| ENSG00000084731 | KIF3C           | kinesin family member 3C [Source:HGNC Symbol;Acc:HGNC:6321]                                            | 349  | 0.6 | 0.11 | 5.66  | 1.48E-08  | 2.67E-07  |
| ENSG00000213694 | S1PR3           | sphingosine-1-phosphate receptor 3 [Source:HGNC Symbol;Acc:HGNC:3167]                                  | 583  | 0.6 | 0.08 | 7.46  | 8.83E-14  | 3.02E-12  |
| ENSG00000131015 | ULBP2           | UL16 binding protein 2 [Source:HGNC Symbol;Acc:HGNC:14894]                                             | 307  | 0.6 | 0.11 | 5.61  | 2.08E-08  | 3.67E-07  |
| ENSG00000249279 | LINC02057       | long intergenic non-protein coding RNA 2057 [Source:HGNC Symbol;Acc:HGNC:52900]                        | 88   | 0.6 | 0.20 | 3.15  | 0.0016143 | 0.0095279 |
| ENSG00000106701 | FSD1L           | fibronectin type III and SPRY domain containing 1 like [Source:HGNC Symbol;Acc:HGNC:13753]             | 85   | 0.6 | 0.20 | 3.12  | 0.0017884 | 0.0104108 |
| ENSG00000197385 | ZNF860          | zinc finger protein 860 [Source:HGNC Symbol;Acc:HGNC:34513]                                            | 141  | 0.6 | 0.17 | 3.76  | 1.68E-04  | 0.0013429 |
| ENSG00000006652 | IFRD1           | interferon related developmental regulator 1 [Source:HGNC Symbol;Acc:HGNC:5456]                        | 2541 | 0.6 | 0.05 | 13.68 | 1.33E-42  | 3.03E-40  |
| ENSG00000100558 | PLEK2           | pleckstrin 2 [Source:HGNC Symbol;Acc:HGNC:19238]                                                       | 356  | 0.6 | 0.12 | 5.28  | 1.28E-07  | 1.98E-06  |
| ENSG00000232533 | ENSG00000232533 | novel transcript                                                                                       | 147  | 0.6 | 0.16 | 4.12  | 3.73E-05  | 3.59E-04  |
| ENSG0000029153  | ARNTL2          | aryl hydrocarbon receptor nuclear translocator like 2 [Source:HGNC Symbol;Acc:HGNC:18984]              | 1696 | 0.6 | 0.06 | 11.67 | 1.84E-31  | 2.22E-29  |
| ENSG00000151014 | NOCT            | nocturnin [Source:HGNC Symbol;Acc:HGNC:14254]                                                          | 667  | 0.6 | 0.08 | 7.79  | 6.53E-15  | 2.46E-13  |
| ENSG00000071282 | LMCD1           | LIM and cysteine rich domains 1 [Source:HGNC Symbol;Acc:HGNC:6633]                                     | 275  | 0.6 | 0.12 | 5.59  | 2.28E-08  | 3.98E-07  |
| ENSG00000180914 | OXTR            | oxytocin receptor [Source:HGNC Symbol;Acc:HGNC:8529]                                                   | 1643 | 0.6 | 0.05 | 12.30 | 9.15E-35  | 1.29E-32  |
| ENSG00000246859 | STAR4-AS1       | STAR4 antisense RNA 1 [Source:HGNC Symbol;Acc:HGNC:44117]                                              | 79   | 0.6 | 0.22 | 3.01  | 0.0026527 | 0.014534  |
| ENSG00000143322 | ABL2            | ABL proto-oncogene 2, non-receptor tyrosine kinase [Source:HGNC Symbol;Acc:HGNC:77]                    | 1812 | 0.7 | 0.05 | 12.72 | 4.29E-37  | 6.79E-35  |
| ENSG00000119699 | TGFB3           | transforming growth factor beta 3 [Source:HGNC Symbol;Acc:HGNC:11769]                                  | 138  | 0.7 | 0.16 | 4.11  | 3.92E-05  | 3.73E-04  |
| ENSG00000197614 | MFAP5           | microfibril associated protein 5 [Source:HGNC Symbol;Acc:HGNC:29673]                                   | 1379 | 0.7 | 0.06 | 11.09 | 1.45E-28  | 1.56E-26  |
| ENSG00000087303 | NID2            | nidogen 2 [Source:HGNC Symbol;Acc:HGNC:13389]                                                          | 154  | 0.7 | 0.16 | 4.18  | 2.96E-05  | 2.91E-04  |
| ENSG00000136999 | CCN3            | cellular communication network factor 3 [Source:HGNC Symbol;Acc:HGNC:7885]                             | 114  | 0.7 | 0.18 | 3.72  | 2.01E-04  | 0.001574  |
| ENSG00000228742 | LINC02577       | long intergenic non-protein coding RNA 2577 [Source:HGNC Symbol;Acc:HGNC:53749]                        | 72   | 0.7 | 0.25 | 2.63  | 0.0084497 | 0.0375832 |
| ENSG00000183496 | MEX3B           | mex-3 RNA binding family member B [Source:HGNC Symbol;Acc:HGNC:25297]                                  | 112  | 0.7 | 0.18 | 3.64  | 2.77E-04  | 0.002088  |
| ENSG00000127418 | FGFRL1          | fibroblast growth factor receptor like 1 [Source:HGNC Symbol;Acc:HGNC:3693]                            | 265  | 0.7 | 0.12 | 5.70  | 1.20E-08  | 2.20E-07  |
| ENSG00000145375 | SPATA5          | spermatogenesis associated 5 [Source:HGNC Symbol;Acc:HGNC:18119]                                       | 369  | 0.7 | 0.10 | 6.59  | 4.36E-11  | 1.12E-09  |
| ENSG00000142920 | AZIN2           | antizyme inhibitor 2 [Source:HGNC Symbol;Acc:HGNC:29957]                                               | 84   | 0.7 | 0.21 | 3.24  | 0.0012115 | 0.0074736 |
| ENSG00000134775 | FHOD3           | formin homology 2 domain containing 3 [Source:HGNC Symbol;Acc:HGNC:26178]                              | 103  | 0.7 | 0.20 | 3.40  | 6.84E-04  | 0.00458   |
| ENSG00000115419 | GLS             | glutaminase [Source:HGNC Symbol;Acc:HGNC:4331]                                                         | 5661 | 0.7 | 0.04 | 15.37 | 2.67E-53  | 1.00E-50  |
| ENSG00000101197 | BIRC7           | baculoviral IAP repeat containing 7 [Source:HGNC Symbol;Acc:HGNC:13702]                                | 124  | 0.7 | 0.18 | 3.70  | 2.19E-04  | 0.0016974 |
| ENSG00000164176 | EDIL3           | EGF like repeats and discoidin domains 3 [Source:HGNC Symbol;Acc:HGNC:3173]                            | 681  | 0.7 | 0.08 | 8.75  | 2.11E-18  | 1.09E-16  |
| ENSG00000132031 | MATN3           | matrilin 3 [Source:HGNC Symbol;Acc:HGNC:6909]                                                          | 116  | 0.7 | 0.17 | 3.86  | 1.13E-04  | 9.48E-04  |
| ENSG00000163659 | TIPARP          | TCDD inducible poly(ADP-ribose) polymerase [Source:HGNC Symbol;Acc:HGNC:23696]                         | 1423 | 0.7 | 0.06 | 11.62 | 3.38E-31  | 3.95E-29  |
| ENSG00000144645 | OSBPL10         | oxysterol binding protein like 10 [Source:HGNC Symbol;Acc:HGNC:16395]                                  | 971  | 0.7 | 0.07 | 9.74  | 2.05E-22  | 1.45E-20  |
| ENSG00000114251 | WNT5A           | Wnt family member 5A [Source:HGNC Symbol;Acc:HGNC:12784]                                               | 214  | 0.7 | 0.14 | 5.00  | 5.81E-07  | 7.96E-06  |
| ENSG00000240891 | PLCXD2          | phosphatidylinositol specific phospholipase C X domain containing 2 [Source:HGNC Symbol;Acc:HGNC:2644] | 263  | 0.7 | 0.12 | 5.55  | 2.90E-08  | 4.97E-07  |
| ENSG00000116717 | GADD45A         | growth arrest and DNA damage inducible alpha [Source:HGNC Symbol;Acc:HGNC:4095]                        | 3546 | 0.7 | 0.06 | 11.65 | 2.31E-31  | 2.74E-29  |
| ENSG00000087085 | ACHE            | acetylcholinesterase (Cartwright blood group) [Source:HGNC Symbol;Acc:HGNC:108]                        | 355  | 0.7 | 0.11 | 6.35  | 2.19E-10  | 5.13E-09  |
| ENSG00000176171 | BNIP3           | BCL2 interacting protein 3 [Source:HGNC Symbol;Acc:HGNC:1084]                                          | 2086 | 0.7 | 0.06 | 12.26 | 1.57E-34  | 2.20E-32  |
| ENSG00000122547 | EEDP1           | endonuclease/exonuclease/phosphatase family domain containing 1 [Source:HGNC Symbol;Acc:HGNC:222]      | 69   | 0.7 | 0.23 | 2.92  | 0.0035322 | 0.0183665 |
| ENSG00000187699 | C2orf88         | chromosome 2 open reading frame 88 [Source:HGNC Symbol;Acc:HGNC:28191]                                 | 55   | 0.7 | 0.25 | 2.68  | 0.007431  | 0.0337219 |
| ENSG00000163637 | PRICKLE2        | prickle planar cell polarity protein 2 [Source:HGNC Symbol;Acc:HGNC:20340]                             | 172  | 0.7 | 0.14 | 4.77  | 1.83E-06  | 2.31E-05  |
| ENSG00000105926 | MPP6            | membrane palmitoylated protein 6 [Source:HGNC Symbol;Acc:HGNC:18167]                                   | 375  | 0.7 | 0.12 | 5.90  | 3.66E-09  | 7.26E-08  |
| ENSG00000104312 | RIPK2           | receptor interacting serine/threonine kinase 2 [Source:HGNC Symbol;Acc:HGNC:10020]                     | 1249 | 0.7 | 0.06 | 11.02 | 2.98E-28  | 3.14E-26  |



|                 |                 |                                                                                                         |      |     |      |       |           |           |
|-----------------|-----------------|---------------------------------------------------------------------------------------------------------|------|-----|------|-------|-----------|-----------|
| ENSG00000100290 | BIK             | BCL2 interacting killer [Source:HGNC Symbol;Acc:HGNC:1051]                                              | 301  | 0.7 | 0.12 | 5.95  | 2.76E-09  | 5.56E-08  |
| ENSG00000134070 | IRAK2           | interleukin 1 receptor associated kinase 2 [Source:HGNC Symbol;Acc:HGNC:6113]                           | 163  | 0.7 | 0.15 | 4.68  | 2.90E-06  | 3.53E-05  |
| ENSG00000100003 | SEC14L2         | SEC14 like lipid binding 2 [Source:HGNC Symbol;Acc:HGNC:10699]                                          | 329  | 0.7 | 0.10 | 6.57  | 4.99E-11  | 1.27E-09  |
| ENSG00000122707 | RECK            | reversion inducing cysteine rich protein with kazal motifs [Source:HGNC Symbol;Acc:HGNC:11345]          | 192  | 0.7 | 0.13 | 5.10  | 3.34E-07  | 4.79E-06  |
| ENSG00000186832 | KRT16           | keratin 16 [Source:HGNC Symbol;Acc:HGNC:6423]                                                           | 5189 | 0.7 | 0.05 | 13.54 | 9.48E-42  | 1.93E-39  |
| ENSG00000156103 | MMP16           | matrix metalloproteinase 16 [Source:HGNC Symbol;Acc:HGNC:7162]                                          | 160  | 0.7 | 0.15 | 4.62  | 3.84E-06  | 4.55E-05  |
| ENSG00000077274 | CAPN6           | calpain 6 [Source:HGNC Symbol;Acc:HGNC:1483]                                                            | 190  | 0.7 | 0.14 | 5.04  | 4.56E-07  | 6.37E-06  |
| ENSG00000156510 | HKDC1           | hexokinase domain containing 1 [Source:HGNC Symbol;Acc:HGNC:23302]                                      | 78   | 0.7 | 0.21 | 3.30  | 9.64E-04  | 0.0061456 |
| ENSG00000116106 | EPHA4           | EPH receptor A4 [Source:HGNC Symbol;Acc:HGNC:3388]                                                      | 636  | 0.7 | 0.08 | 8.97  | 2.96E-19  | 1.64E-17  |
| ENSG00000105825 | TFPI2           | tissue factor pathway inhibitor 2 [Source:HGNC Symbol;Acc:HGNC:11761]                                   | 3486 | 0.7 | 0.05 | 14.53 | 8.14E-48  | 2.47E-45  |
| ENSG00000151835 | SACS            | sacsin molecular chaperone [Source:HGNC Symbol;Acc:HGNC:10519]                                          | 259  | 0.7 | 0.12 | 5.77  | 7.79E-09  | 1.48E-07  |
| ENSG00000124615 | MOCS1           | molybdenum cofactor synthesis 1 [Source:HGNC Symbol;Acc:HGNC:7190]                                      | 60   | 0.7 | 0.25 | 2.75  | 0.0060399 | 0.0284838 |
| ENSG00000204291 | COL15A1         | collagen type XV alpha 1 chain [Source:HGNC Symbol;Acc:HGNC:2192]                                       | 185  | 0.7 | 0.14 | 5.07  | 3.88E-07  | 5.48E-06  |
| ENSG00000058085 | LAMC2           | laminin subunit gamma 2 [Source:HGNC Symbol;Acc:HGNC:6493]                                              | 6496 | 0.7 | 0.04 | 19.63 | 9.15E-86  | 1.13E-82  |
| ENSG00000135362 | PRR5L           | proline rich 5 like [Source:HGNC Symbol;Acc:HGNC:25878]                                                 | 205  | 0.7 | 0.13 | 5.28  | 1.27E-07  | 1.98E-06  |
| ENSG00000183691 | NOG             | noggin [Source:HGNC Symbol;Acc:HGNC:7866]                                                               | 421  | 0.7 | 0.10 | 6.73  | 1.70E-11  | 4.62E-10  |
| ENSG00000157613 | CREB3L1         | cAMP responsive element binding protein 3 like 1 [Source:HGNC Symbol;Acc:HGNC:18856]                    | 70   | 0.7 | 0.23 | 3.04  | 0.0023388 | 0.0130716 |
| ENSG00000263006 | ROCK1P1         | Rho associated coiled-coil containing protein kinase 1 pseudogene 1 [Source:HGNC Symbol;Acc:HGNC:3783]  | 168  | 0.7 | 0.15 | 4.76  | 1.98E-06  | 2.48E-05  |
| ENSG00000071909 | MYO3B           | myosin IIIB [Source:HGNC Symbol;Acc:HGNC:15576]                                                         | 157  | 0.7 | 0.16 | 4.52  | 6.20E-06  | 7.07E-05  |
| ENSG00000157551 | KCNJ15          | potassium inwardly rectifying channel subfamily J member 15 [Source:HGNC Symbol;Acc:HGNC:6261]          | 88   | 0.7 | 0.20 | 3.56  | 3.71E-04  | 0.0026966 |
| ENSG00000073756 | PTGS2           | prostaglandin-endoperoxide synthase 2 [Source:HGNC Symbol;Acc:HGNC:9605]                                | 713  | 0.7 | 0.08 | 8.94  | 3.85E-19  | 2.10E-17  |
| ENSG00000171608 | PIK3CD          | phosphatidylinositol-4,5-bisphosphate 3-kinase catalytic subunit delta [Source:HGNC Symbol;Acc:HGNC:89] | 262  | 0.7 | 0.13 | 5.56  | 2.64E-08  | 4.55E-07  |
| ENSG00000177283 | FZD8            | frizzled class receptor 8 [Source:HGNC Symbol;Acc:HGNC:4046]                                            | 80   | 0.7 | 0.22 | 3.17  | 0.0015389 | 0.0091536 |
| ENSG00000185418 | TARS3           | threonyl-tRNA synthetase 3 [Source:HGNC Symbol;Acc:HGNC:24728]                                          | 309  | 0.7 | 0.12 | 6.15  | 7.90E-10  | 1.71E-08  |
| ENSG00000125384 | PTGER2          | prostaglandin E receptor 2 [Source:HGNC Symbol;Acc:HGNC:9594]                                           | 210  | 0.7 | 0.13 | 5.43  | 5.77E-08  | 9.45E-07  |
| ENSG00000131378 | RFTN1           | raftlin, lipid raft linker 1 [Source:HGNC Symbol;Acc:HGNC:30278]                                        | 102  | 0.7 | 0.18 | 3.88  | 1.04E-04  | 8.88E-04  |
| ENSG00000131746 | TNS4            | tensin 4 [Source:HGNC Symbol;Acc:HGNC:24352]                                                            | 310  | 0.7 | 0.11 | 6.52  | 6.95E-11  | 1.73E-09  |
| ENSG00000282034 | ENSG00000282034 | novel transcript                                                                                        | 51   | 0.7 | 0.27 | 2.69  | 0.0072485 | 0.0330145 |
| ENSG00000270002 | ENSG00000270002 | novel transcript, antisense to GRID1                                                                    | 66   | 0.7 | 0.24 | 2.97  | 0.0029689 | 0.0159732 |
| ENSG00000064886 | CHI3L2          | chitinase 3 like 2 [Source:HGNC Symbol;Acc:HGNC:1933]                                                   | 87   | 0.7 | 0.21 | 3.46  | 5.46E-04  | 0.0037804 |
| ENSG00000286134 | ENSG00000286134 | novel transcript                                                                                        | 98   | 0.7 | 0.19 | 3.75  | 1.74E-04  | 0.0013864 |
| ENSG00000110880 | CORO1C          | coronin 1C [Source:HGNC Symbol;Acc:HGNC:2254]                                                           | 3974 | 0.7 | 0.04 | 18.06 | 6.28E-73  | 4.05E-70  |
| ENSG00000107819 | SFXN3           | sideroflexin 3 [Source:HGNC Symbol;Acc:HGNC:16087]                                                      | 2012 | 0.7 | 0.05 | 13.77 | 3.89E-43  | 9.35E-41  |
| ENSG00000127124 | HIVEP3          | HIVEP zinc finger 3 [Source:HGNC Symbol;Acc:HGNC:13561]                                                 | 92   | 0.7 | 0.20 | 3.67  | 2.40E-04  | 0.0018465 |
| ENSG00000251322 | SHANK3          | SH3 and multiple ankyrin repeat domains 3 [Source:HGNC Symbol;Acc:HGNC:14294]                           | 93   | 0.7 | 0.21 | 3.44  | 5.90E-04  | 0.0040503 |
| ENSG00000120129 | DUSP1           | dual specificity phosphatase 1 [Source:HGNC Symbol;Acc:HGNC:3064]                                       | 2013 | 0.7 | 0.05 | 13.19 | 9.64E-40  | 1.77E-37  |
| ENSG00000139973 | SYT16           | synaptotagmin 16 [Source:HGNC Symbol;Acc:HGNC:23142]                                                    | 551  | 0.7 | 0.08 | 8.57  | 1.06E-17  | 5.16E-16  |
| ENSG00000253824 | ENSG00000253824 | novel transcript                                                                                        | 52   | 0.7 | 0.27 | 2.72  | 0.0065989 | 0.0306536 |
| ENSG00000188620 | HMX3            | H6 family homeobox 3 [Source:HGNC Symbol;Acc:HGNC:5019]                                                 | 271  | 0.7 | 0.11 | 6.32  | 2.57E-10  | 5.96E-09  |
| ENSG00000101489 | CELF4           | CUGBP Elav-like family member 4 [Source:HGNC Symbol;Acc:HGNC:14015]                                     | 115  | 0.7 | 0.18 | 4.01  | 6.10E-05  | 5.53E-04  |
| ENSG00000111424 | VDR             | vitamin D receptor [Source:HGNC Symbol;Acc:HGNC:12679]                                                  | 1896 | 0.7 | 0.05 | 14.62 | 2.12E-48  | 6.84E-46  |
| ENSG00000121297 | TSHZ3           | teashirt zinc finger homeobox 3 [Source:HGNC Symbol;Acc:HGNC:30700]                                     | 53   | 0.7 | 0.26 | 2.81  | 0.0049017 | 0.0240006 |

|                 |                 |                                                                                               |       |     |      |       |           |           |
|-----------------|-----------------|-----------------------------------------------------------------------------------------------|-------|-----|------|-------|-----------|-----------|
| ENSG00000075340 | ADD2            | adducin 2 [Source:HGNC Symbol;Acc:HGNC:244]                                                   | 360   | 0.7 | 0.11 | 6.96  | 3.47E-12  | 1.00E-10  |
| ENSG00000152137 | HSPB8           | heat shock protein family B (small) member 8 [Source:HGNC Symbol;Acc:HGNC:30171]              | 1331  | 0.7 | 0.06 | 12.01 | 3.25E-33  | 4.37E-31  |
| ENSG00000118508 | RAB32           | RAB32, member RAS oncogene family [Source:HGNC Symbol;Acc:HGNC:9772]                          | 1228  | 0.7 | 0.07 | 10.89 | 1.27E-27  | 1.29E-25  |
| ENSG00000169914 | OTUD3           | OTU deubiquitinase 3 [Source:HGNC Symbol;Acc:HGNC:29038]                                      | 682   | 0.7 | 0.08 | 9.80  | 1.12E-22  | 8.09E-21  |
| ENSG00000163364 | LINC01116       | long intergenic non-protein coding RNA 1116 [Source:HGNC Symbol;Acc:HGNC:49259]               | 89    | 0.7 | 0.21 | 3.60  | 3.21E-04  | 0.0023748 |
| ENSG00000086289 | EPDR1           | ependymin related 1 [Source:HGNC Symbol;Acc:HGNC:17572]                                       | 388   | 0.7 | 0.10 | 7.57  | 3.71E-14  | 1.30E-12  |
| ENSG00000261115 | TMEM178B        | transmembrane protein 178B [Source:HGNC Symbol;Acc:HGNC:44112]                                | 368   | 0.7 | 0.10 | 7.21  | 5.80E-13  | 1.82E-11  |
| ENSG00000172817 | CYP7B1          | cytochrome P450 family 7 subfamily B member 1 [Source:HGNC Symbol;Acc:HGNC:2652]              | 429   | 0.7 | 0.10 | 7.82  | 5.49E-15  | 2.09E-13  |
| ENSG00000162772 | ATF3            | activating transcription factor 3 [Source:HGNC Symbol;Acc:HGNC:785]                           | 1704  | 0.8 | 0.05 | 14.16 | 1.67E-45  | 4.80E-43  |
| ENSG00000138131 | LOXL4           | lysyl oxidase like 4 [Source:HGNC Symbol;Acc:HGNC:17171]                                      | 108   | 0.8 | 0.19 | 4.00  | 6.29E-05  | 5.68E-04  |
| ENSG00000260196 | ENSG00000260196 | antisense to KCNJ11 and overlapping to a novel gene                                           | 55    | 0.8 | 0.26 | 2.89  | 0.0038267 | 0.0195726 |
| ENSG00000077150 | NFKB2           | nuclear factor kappa B subunit 2 [Source:HGNC Symbol;Acc:HGNC:7795]                           | 4451  | 0.8 | 0.04 | 18.50 | 1.99E-76  | 1.46E-73  |
| ENSG00000249992 | TMEM158         | transmembrane protein 158 [Source:HGNC Symbol;Acc:HGNC:30293]                                 | 430   | 0.8 | 0.10 | 7.30  | 2.79E-13  | 9.25E-12  |
| ENSG00000253368 | TRNP1           | TMF1 regulated nuclear protein 1 [Source:HGNC Symbol;Acc:HGNC:34348]                          | 299   | 0.8 | 0.12 | 6.21  | 5.14E-10  | 1.15E-08  |
| ENSG00000164236 | ANKRD33B        | ankyrin repeat domain 33B [Source:HGNC Symbol;Acc:HGNC:35240]                                 | 291   | 0.8 | 0.12 | 6.61  | 3.92E-11  | 1.02E-09  |
| ENSG00000145700 | ANKRD31         | ankyrin repeat domain 31 [Source:HGNC Symbol;Acc:HGNC:26853]                                  | 53    | 0.8 | 0.26 | 2.89  | 0.0038848 | 0.0198414 |
| ENSG00000068366 | ACSL4           | acyl-CoA synthetase long chain family member 4 [Source:HGNC Symbol;Acc:HGNC:3571]             | 812   | 0.8 | 0.07 | 10.75 | 5.95E-27  | 5.71E-25  |
| ENSG00000254510 | ENSG00000254510 | novel transcript                                                                              | 50    | 0.8 | 0.26 | 2.93  | 0.0034246 | 0.017876  |
| ENSG00000137502 | RAB30           | RAB30, member RAS oncogene family [Source:HGNC Symbol;Acc:HGNC:9770]                          | 210   | 0.8 | 0.13 | 5.72  | 1.07E-08  | 1.97E-07  |
| ENSG00000163216 | SPRR2D          | small proline rich protein 2D [Source:HGNC Symbol;Acc:HGNC:11264]                             | 103   | 0.8 | 0.19 | 4.11  | 3.91E-05  | 3.73E-04  |
| ENSG00000101335 | MYL9            | myosin light chain 9 [Source:HGNC Symbol;Acc:HGNC:15754]                                      | 19087 | 0.8 | 0.03 | 22.31 | 3.09E-110 | 7.13E-107 |
| ENSG00000087494 | PTH1H           | parathyroid hormone like hormone [Source:HGNC Symbol;Acc:HGNC:9607]                           | 51    | 0.8 | 0.26 | 2.94  | 0.0032766 | 0.0172996 |
| ENSG00000164647 | STEAP1          | STEAP family member 1 [Source:HGNC Symbol;Acc:HGNC:11378]                                     | 57    | 0.8 | 0.25 | 3.16  | 0.001574  | 0.0093208 |
| ENSG00000101384 | JAG1            | jagged canonical Notch ligand 1 [Source:HGNC Symbol;Acc:HGNC:6188]                            | 879   | 0.8 | 0.07 | 11.31 | 1.21E-29  | 1.34E-27  |
| ENSG00000102924 | CBLN1           | cerebellin 1 precursor [Source:HGNC Symbol;Acc:HGNC:1543]                                     | 171   | 0.8 | 0.15 | 5.22  | 1.77E-07  | 2.67E-06  |
| ENSG00000053747 | LAMA3           | laminin subunit alpha 3 [Source:HGNC Symbol;Acc:HGNC:6483]                                    | 6130  | 0.8 | 0.04 | 22.10 | 2.89E-108 | 5.82E-105 |
| ENSG00000280435 | ENSG00000280435 | TEC                                                                                           | 61    | 0.8 | 0.24 | 3.25  | 0.0011541 | 0.0071872 |
| ENSG00000235885 | LINC01828       | long intergenic non-protein coding RNA 1828 [Source:HGNC Symbol;Acc:HGNC:52634]               | 74    | 0.8 | 0.24 | 3.22  | 0.0012825 | 0.0078397 |
| ENSG00000178726 | THBD            | thrombomodulin [Source:HGNC Symbol;Acc:HGNC:11784]                                            | 714   | 0.8 | 0.08 | 10.29 | 8.03E-25  | 6.57E-23  |
| ENSG00000125378 | BMP4            | bone morphogenetic protein 4 [Source:HGNC Symbol;Acc:HGNC:1071]                               | 61    | 0.8 | 0.24 | 3.28  | 0.0010396 | 0.0065585 |
| ENSG00000166741 | NNMT            | nicotinamide N-methyltransferase [Source:HGNC Symbol;Acc:HGNC:7861]                           | 156   | 0.8 | 0.16 | 5.05  | 4.52E-07  | 6.32E-06  |
| ENSG00000166147 | FBN1            | fibrillin 1 [Source:HGNC Symbol;Acc:HGNC:3603]                                                | 270   | 0.8 | 0.13 | 6.24  | 4.28E-10  | 9.64E-09  |
| ENSG00000203711 | C6orf99         | chromosome 6 putative open reading frame 99 [Source:HGNC Symbol;Acc:HGNC:21179]               | 111   | 0.8 | 0.19 | 4.10  | 4.09E-05  | 3.88E-04  |
| ENSG00000155465 | SLC7A7          | solute carrier family 7 member 7 [Source:HGNC Symbol;Acc:HGNC:11065]                          | 288   | 0.8 | 0.12 | 6.48  | 9.11E-11  | 2.25E-09  |
| ENSG00000117228 | GBP1            | guanylate binding protein 1 [Source:HGNC Symbol;Acc:HGNC:4182]                                | 2295  | 0.8 | 0.05 | 16.60 | 6.54E-62  | 3.30E-59  |
| ENSG00000113319 | RASGRF2         | Ras protein specific guanine nucleotide releasing factor 2 [Source:HGNC Symbol;Acc:HGNC:9876] | 55    | 0.8 | 0.26 | 3.14  | 0.0017185 | 0.0100326 |
| ENSG00000017483 | SLC38A5         | solute carrier family 38 member 5 [Source:HGNC Symbol;Acc:HGNC:18070]                         | 36    | 0.8 | 0.31 | 2.60  | 0.0092925 | 0.0406253 |
| ENSG00000159840 | ZYX             | zyxin [Source:HGNC Symbol;Acc:HGNC:13200]                                                     | 2007  | 0.8 | 0.05 | 15.51 | 3.15E-54  | 1.27E-51  |
| ENSG00000167191 | GPRC5B          | G protein-coupled receptor class C group 5 member B [Source:HGNC Symbol;Acc:HGNC:13308]       | 851   | 0.8 | 0.08 | 10.75 | 5.80E-27  | 5.60E-25  |
| ENSG00000189410 | SH2D5           | SH2 domain containing 5 [Source:HGNC Symbol;Acc:HGNC:28819]                                   | 52    | 0.8 | 0.26 | 3.08  | 0.0020633 | 0.0117354 |
| ENSG00000118985 | ELL2            | elongation factor for RNA polymerase II 2 [Source:HGNC Symbol;Acc:HGNC:17064]                 | 973   | 0.8 | 0.08 | 9.62  | 6.84E-22  | 4.67E-20  |
| ENSG00000139211 | AMIGO2          | adhesion molecule with Ig like domain 2 [Source:HGNC Symbol;Acc:HGNC:24073]                   | 905   | 0.8 | 0.07 | 11.37 | 5.89E-30  | 6.68E-28  |

|                 |                 |                                                                                                                |       |     |      |       |           |           |
|-----------------|-----------------|----------------------------------------------------------------------------------------------------------------|-------|-----|------|-------|-----------|-----------|
| ENSG00000188211 | NCR3LG1         | natural killer cell cytotoxicity receptor 3 ligand 1 [Source:HGNC Symbol;Acc:HGNC:42400]                       | 322   | 0.8 | 0.12 | 6.67  | 2.60E-11  | 6.96E-10  |
| ENSG00000268941 | LINC01711       | long intergenic non-protein coding RNA 1711 [Source:HGNC Symbol;Acc:HGNC:28663]                                | 61    | 0.8 | 0.25 | 3.32  | 8.96E-04  | 0.0057788 |
| ENSG00000111186 | WNT5B           | Wnt family member 5B [Source:HGNC Symbol;Acc:HGNC:16265]                                                       | 115   | 0.8 | 0.20 | 4.18  | 2.96E-05  | 2.91E-04  |
| ENSG00000149591 | TAGLN           | transgelin [Source:HGNC Symbol;Acc:HGNC:11553]                                                                 | 489   | 0.8 | 0.09 | 9.36  | 8.30E-21  | 5.12E-19  |
| ENSG00000196126 | HLA-DRB1        | major histocompatibility complex, class II, DR beta 1 [Source:HGNC Symbol;Acc:HGNC:4948]                       | 61    | 0.8 | 0.30 | 2.74  | 0.0061861 | 0.0290386 |
| ENSG00000133816 | MICAL2          | microtubule associated monooxygenase, calponin and LIM domain containing 2 [Source:HGNC Symbol;Acc:HGNC:14065] | 610   | 0.8 | 0.08 | 10.01 | 1.31E-23  | 1.01E-21  |
| ENSG00000048052 | HDAC9           | histone deacetylase 9 [Source:HGNC Symbol;Acc:HGNC:14065]                                                      | 94    | 0.8 | 0.20 | 4.21  | 2.56E-05  | 2.55E-04  |
| ENSG00000113196 | HAND1           | heart and neural crest derivatives expressed 1 [Source:HGNC Symbol;Acc:HGNC:4807]                              | 35    | 0.8 | 0.32 | 2.60  | 0.0094152 | 0.0410284 |
| ENSG00000169213 | RAB3B           | RAB3B, member RAS oncogene family [Source:HGNC Symbol;Acc:HGNC:9778]                                           | 272   | 0.8 | 0.13 | 6.52  | 6.92E-11  | 1.73E-09  |
| ENSG00000127325 | BEST3           | bestrophin 3 [Source:HGNC Symbol;Acc:HGNC:17105]                                                               | 38    | 0.8 | 0.30 | 2.75  | 0.0059723 | 0.0282392 |
| ENSG00000162409 | PRKAA2          | protein kinase AMP-activated catalytic subunit alpha 2 [Source:HGNC Symbol;Acc:HGNC:9377]                      | 129   | 0.8 | 0.17 | 4.92  | 8.49E-07  | 1.14E-05  |
| ENSG00000134871 | COL4A2          | collagen type IV alpha 2 chain [Source:HGNC Symbol;Acc:HGNC:2203]                                              | 3225  | 0.8 | 0.04 | 19.35 | 2.13E-83  | 2.14E-80  |
| ENSG00000131668 | BARX1           | BARX homeobox 1 [Source:HGNC Symbol;Acc:HGNC:955]                                                              | 307   | 0.8 | 0.11 | 7.74  | 9.90E-15  | 3.63E-13  |
| ENSG00000122694 | GLIPR2          | GLI pathogenesis related 2 [Source:HGNC Symbol;Acc:HGNC:18007]                                                 | 155   | 0.8 | 0.16 | 5.33  | 9.92E-08  | 1.56E-06  |
| ENSG00000275894 | ENSG00000275894 | novel transcript, sense intronic to SDC4                                                                       | 52    | 0.8 | 0.26 | 3.21  | 0.0013343 | 0.0081069 |
| ENSG00000135766 | EGLN1           | egl-9 family hypoxia inducible factor 1 [Source:HGNC Symbol;Acc:HGNC:1232]                                     | 182   | 0.8 | 0.16 | 5.16  | 2.52E-07  | 3.69E-06  |
| ENSG00000143153 | ATP1B1          | ATPase Na <sup>+</sup> /K <sup>+</sup> transporting subunit beta 1 [Source:HGNC Symbol;Acc:HGNC:804]           | 2358  | 0.8 | 0.06 | 13.57 | 6.24E-42  | 1.36E-39  |
| ENSG00000137801 | THBS1           | thrombospondin 1 [Source:HGNC Symbol;Acc:HGNC:11785]                                                           | 20795 | 0.8 | 0.03 | 28.21 | 4.23E-175 | 2.27E-171 |
| ENSG00000134853 | PDGFRA          | platelet derived growth factor receptor alpha [Source:HGNC Symbol;Acc:HGNC:8803]                               | 36    | 0.8 | 0.31 | 2.73  | 0.0063807 | 0.0297946 |
| ENSG00000140682 | TGFB1I1         | transforming growth factor beta 1 induced transcript 1 [Source:HGNC Symbol;Acc:HGNC:11767]                     | 401   | 0.8 | 0.10 | 8.46  | 2.67E-17  | 1.26E-15  |
| ENSG00000259727 | ENSG00000259727 | novel transcript                                                                                               | 31    | 0.9 | 0.33 | 2.59  | 0.0097064 | 0.0419569 |
| ENSG00000065325 | GLP2R           | glucagon like peptide 2 receptor [Source:HGNC Symbol;Acc:HGNC:4325]                                            | 81    | 0.9 | 0.23 | 3.74  | 1.81E-04  | 0.0014345 |
| ENSG00000143473 | KCNH1           | potassium voltage-gated channel subfamily H member 1 [Source:HGNC Symbol;Acc:HGNC:6250]                        | 90    | 0.9 | 0.21 | 4.12  | 3.84E-05  | 3.68E-04  |
| ENSG00000204335 | SP5             | Sp5 transcription factor [Source:HGNC Symbol;Acc:HGNC:14529]                                                   | 108   | 0.9 | 0.20 | 4.21  | 2.60E-05  | 2.58E-04  |
| ENSG00000072163 | LIMS2           | LIM zinc finger domain containing 2 [Source:HGNC Symbol;Acc:HGNC:16084]                                        | 159   | 0.9 | 0.15 | 5.58  | 2.34E-08  | 4.09E-07  |
| ENSG00000189223 | PAX8-AS1        | PAX8 antisense RNA 1 [Source:HGNC Symbol;Acc:HGNC:49271]                                                       | 34    | 0.9 | 0.33 | 2.61  | 0.0089728 | 0.0395388 |
| ENSG00000179841 | AKAP5           | A-kinase anchoring protein 5 [Source:HGNC Symbol;Acc:HGNC:375]                                                 | 162   | 0.9 | 0.15 | 5.77  | 7.85E-09  | 1.49E-07  |
| ENSG00000184845 | DRD1            | dopamine receptor D1 [Source:HGNC Symbol;Acc:HGNC:3020]                                                        | 92    | 0.9 | 0.21 | 4.20  | 2.66E-05  | 2.63E-04  |
| ENSG00000206190 | ATP10A          | ATPase phospholipid transporting 10A (putative) [Source:HGNC Symbol;Acc:HGNC:13542]                            | 299   | 0.9 | 0.11 | 7.62  | 2.61E-14  | 9.30E-13  |
| ENSG00000173706 | HEG1            | heart development protein with EGF like domains 1 [Source:HGNC Symbol;Acc:HGNC:29227]                          | 1137  | 0.9 | 0.06 | 13.60 | 4.04E-42  | 8.93E-40  |
| ENSG00000074410 | CA12            | carbonic anhydrase 12 [Source:HGNC Symbol;Acc:HGNC:1371]                                                       | 105   | 0.9 | 0.19 | 4.50  | 6.82E-06  | 7.71E-05  |
| ENSG00000124225 | PMEPA1          | prostate transmembrane protein, androgen induced 1 [Source:HGNC Symbol;Acc:HGNC:14107]                         | 6980  | 0.9 | 0.04 | 24.11 | 2.17E-128 | 6.98E-125 |
| ENSG00000152503 | TRIM36          | tripartite motif containing 36 [Source:HGNC Symbol;Acc:HGNC:16280]                                             | 58    | 0.9 | 0.25 | 3.48  | 5.00E-04  | 0.0035031 |
| ENSG00000233379 | ENSG00000233379 | novel transcript                                                                                               | 40    | 0.9 | 0.33 | 2.64  | 0.008332  | 0.03709   |
| ENSG00000279249 | ENSG00000279249 | novel transcript, antisense to CBLN1                                                                           | 38    | 0.9 | 0.31 | 2.79  | 0.0052936 | 0.0255393 |
| ENSG00000204381 | LAYN            | layilin [Source:HGNC Symbol;Acc:HGNC:29471]                                                                    | 81    | 0.9 | 0.21 | 4.08  | 4.45E-05  | 4.19E-04  |
| ENSG00000231645 | KRT17P6         | keratin 17 pseudogene 6 [Source:HGNC Symbol;Acc:HGNC:50724]                                                    | 38    | 0.9 | 0.32 | 2.72  | 0.0065647 | 0.0305124 |
| ENSG00000179820 | MYADM           | myeloid associated differentiation marker [Source:HGNC Symbol;Acc:HGNC:7544]                                   | 1698  | 0.9 | 0.05 | 15.95 | 2.91E-57  | 1.23E-54  |
| ENSG00000235162 | C12orf75        | chromosome 12 open reading frame 75 [Source:HGNC Symbol;Acc:HGNC:35164]                                        | 3476  | 0.9 | 0.05 | 19.57 | 2.71E-85  | 3.12E-82  |
| ENSG00000257335 | MGAM            | maltase-glucoamylase [Source:HGNC Symbol;Acc:HGNC:7043]                                                        | 70    | 0.9 | 0.23 | 3.94  | 8.02E-05  | 7.06E-04  |
| ENSG00000167601 | AXL             | AXL receptor tyrosine kinase [Source:HGNC Symbol;Acc:HGNC:905]                                                 | 1212  | 0.9 | 0.06 | 14.74 | 3.83E-49  | 1.31E-46  |
| ENSG00000204758 | ENSG00000204758 | novel transcript, antisense to RPL26L1                                                                         | 34    | 0.9 | 0.33 | 2.71  | 0.0067174 | 0.0310965 |

|                 |                 |                                                                                          |       |     |      |       |           |           |
|-----------------|-----------------|------------------------------------------------------------------------------------------|-------|-----|------|-------|-----------|-----------|
| ENSG00000183072 | NKX2-5          | NK2 homeobox 5 [Source:HGNC Symbol;Acc:HGNC:2488]                                        | 317   | 0.9 | 0.12 | 7.28  | 3.43E-13  | 1.13E-11  |
| ENSG00000118503 | TNFAIP3         | TNF alpha induced protein 3 [Source:HGNC Symbol;Acc:HGNC:11896]                          | 763   | 0.9 | 0.08 | 11.66 | 2.10E-31  | 2.50E-29  |
| ENSG00000153162 | BMP6            | bone morphogenetic protein 6 [Source:HGNC Symbol;Acc:HGNC:1073]                          | 113   | 0.9 | 0.18 | 5.03  | 4.99E-07  | 6.92E-06  |
| ENSG00000163235 | TGFA            | transforming growth factor alpha [Source:HGNC Symbol;Acc:HGNC:11765]                     | 3341  | 0.9 | 0.04 | 21.04 | 2.68E-98  | 4.32E-95  |
| ENSG00000166073 | GPR176          | G protein-coupled receptor 176 [Source:HGNC Symbol;Acc:HGNC:32370]                       | 164   | 0.9 | 0.15 | 5.89  | 3.88E-09  | 7.63E-08  |
| ENSG00000175868 | CALCB           | calcitonin related polypeptide beta [Source:HGNC Symbol;Acc:HGNC:1438]                   | 979   | 0.9 | 0.07 | 13.55 | 8.15E-42  | 1.71E-39  |
| ENSG00000170558 | CDH2            | cadherin 2 [Source:HGNC Symbol;Acc:HGNC:1759]                                            | 109   | 0.9 | 0.18 | 4.90  | 9.82E-07  | 1.30E-05  |
| ENSG00000134013 | LOXL2           | lysyl oxidase like 2 [Source:HGNC Symbol;Acc:HGNC:6666]                                  | 151   | 0.9 | 0.15 | 5.88  | 4.08E-09  | 8.00E-08  |
| ENSG00000183853 | KIRREL1         | kirre like nephrin family adhesion molecule 1 [Source:HGNC Symbol;Acc:HGNC:15734]        | 970   | 0.9 | 0.06 | 13.92 | 4.89E-44  | 1.31E-41  |
| ENSG00000143147 | GPR161          | G protein-coupled receptor 161 [Source:HGNC Symbol;Acc:HGNC:23694]                       | 285   | 0.9 | 0.13 | 7.11  | 1.15E-12  | 3.48E-11  |
| ENSG00000131435 | PDLIM4          | PDZ and LIM domain 4 [Source:HGNC Symbol;Acc:HGNC:16501]                                 | 39    | 0.9 | 0.30 | 2.98  | 0.0028845 | 0.0156184 |
| ENSG00000261770 | ENSG00000261770 | novel transcript                                                                         | 143   | 0.9 | 0.16 | 5.69  | 1.30E-08  | 2.35E-07  |
| ENSG00000175040 | CHST2           | carbohydrate sulfotransferase 2 [Source:HGNC Symbol;Acc:HGNC:1970]                       | 51    | 0.9 | 0.26 | 3.43  | 6.00E-04  | 0.0040967 |
| ENSG00000101204 | CHRNA4          | cholinergic receptor nicotinic alpha 4 subunit [Source:HGNC Symbol;Acc:HGNC:1958]        | 48    | 0.9 | 0.27 | 3.37  | 7.50E-04  | 0.0049586 |
| ENSG00000229656 | ITGB1-DT        | ITGB1 divergent transcript [Source:HGNC Symbol;Acc:HGNC:53718]                           | 102   | 0.9 | 0.18 | 4.92  | 8.49E-07  | 1.14E-05  |
| ENSG00000162745 | OLFML2B         | olfactomedin like 2B [Source:HGNC Symbol;Acc:HGNC:24558]                                 | 72    | 0.9 | 0.23 | 3.92  | 9.02E-05  | 7.85E-04  |
| ENSG00000238266 | LINC00707       | long intergenic non-protein coding RNA 707 [Source:HGNC Symbol;Acc:HGNC:44691]           | 42    | 0.9 | 0.30 | 3.01  | 0.0026444 | 0.0145083 |
| ENSG00000128422 | KRT17           | keratin 17 [Source:HGNC Symbol;Acc:HGNC:6427]                                            | 49378 | 0.9 | 0.03 | 27.48 | 3.23E-166 | 1.30E-162 |
| ENSG00000168917 | SLC35G2         | solute carrier family 35 member G2 [Source:HGNC Symbol;Acc:HGNC:28480]                   | 78    | 0.9 | 0.23 | 3.96  | 7.56E-05  | 6.68E-04  |
| ENSG00000123843 | C4BPB           | complement component 4 binding protein beta [Source:HGNC Symbol;Acc:HGNC:1328]           | 134   | 0.9 | 0.18 | 5.16  | 2.41E-07  | 3.55E-06  |
| ENSG00000187498 | COL4A1          | collagen type IV alpha 1 chain [Source:HGNC Symbol;Acc:HGNC:2202]                        | 1377  | 0.9 | 0.06 | 15.79 | 3.81E-56  | 1.58E-53  |
| ENSG00000144331 | ZNF385B         | zinc finger protein 385B [Source:HGNC Symbol;Acc:HGNC:26332]                             | 53    | 0.9 | 0.27 | 3.47  | 5.23E-04  | 0.0036457 |
| ENSG00000127329 | PTPRB           | protein tyrosine phosphatase receptor type B [Source:HGNC Symbol;Acc:HGNC:9665]          | 51    | 0.9 | 0.26 | 3.53  | 4.14E-04  | 0.0029768 |
| ENSG00000075618 | FSCN1           | fascin actin-bundling protein 1 [Source:HGNC Symbol;Acc:HGNC:11148]                      | 2269  | 0.9 | 0.05 | 19.23 | 2.14E-82  | 1.92E-79  |
| ENSG00000171522 | PTGER4          | prostaglandin E receptor 4 [Source:HGNC Symbol;Acc:HGNC:9596]                            | 296   | 0.9 | 0.12 | 7.89  | 3.07E-15  | 1.19E-13  |
| ENSG00000128342 | LIF             | LIF interleukin 6 family cytokine [Source:HGNC Symbol;Acc:HGNC:6596]                     | 131   | 0.9 | 0.34 | 2.78  | 0.0053712 | 0.0258212 |
| ENSG00000274422 | ENSG00000274422 | novel transcript                                                                         | 30    | 0.9 | 0.35 | 2.67  | 0.0075617 | 0.0342207 |
| ENSG00000226887 | ERVMER34-1      | endogenous retrovirus group MER34 member 1, envelope [Source:HGNC Symbol;Acc:HGNC:42970] | 121   | 0.9 | 0.18 | 5.29  | 1.20E-07  | 1.87E-06  |
| ENSG00000145623 | OSMR            | oncostatin M receptor [Source:HGNC Symbol;Acc:HGNC:8507]                                 | 2305  | 0.9 | 0.05 | 19.23 | 2.10E-82  | 1.92E-79  |
| ENSG00000137124 | ALDH1B1         | aldehyde dehydrogenase 1 family member B1 [Source:HGNC Symbol;Acc:HGNC:407]              | 809   | 0.9 | 0.07 | 12.90 | 4.60E-38  | 7.89E-36  |
| ENSG00000225614 | ZNF469          | zinc finger protein 469 [Source:HGNC Symbol;Acc:HGNC:23216]                              | 35    | 0.9 | 0.32 | 2.94  | 0.0033195 | 0.017452  |
| ENSG00000154330 | PGM5            | phosphoglucomutase 5 [Source:HGNC Symbol;Acc:HGNC:8908]                                  | 147   | 0.9 | 0.16 | 5.90  | 3.58E-09  | 7.09E-08  |
| ENSG00000123685 | BATF3           | basic leucine zipper ATF-like transcription factor 3 [Source:HGNC Symbol;Acc:HGNC:28915] | 116   | 0.9 | 0.18 | 5.27  | 1.38E-07  | 2.12E-06  |
| ENSG00000076706 | MCAM            | melanoma cell adhesion molecule [Source:HGNC Symbol;Acc:HGNC:6934]                       | 401   | 0.9 | 0.10 | 9.66  | 4.66E-22  | 3.27E-20  |
| ENSG00000175445 | LPL             | lipoprotein lipase [Source:HGNC Symbol;Acc:HGNC:6677]                                    | 34    | 0.9 | 0.33 | 2.86  | 0.0042984 | 0.021636  |
| ENSG00000129521 | EGLN3           | egl-9 family hypoxia inducible factor 3 [Source:HGNC Symbol;Acc:HGNC:14661]              | 541   | 0.9 | 0.09 | 10.78 | 4.24E-27  | 4.15E-25  |
| ENSG00000074590 | NUAK1           | NUAK family kinase 1 [Source:HGNC Symbol;Acc:HGNC:14311]                                 | 715   | 1.0 | 0.08 | 12.60 | 2.05E-36  | 3.15E-34  |
| ENSG00000167754 | KLK5            | kallikrein related peptidase 5 [Source:HGNC Symbol;Acc:HGNC:6366]                        | 4184  | 1.0 | 0.05 | 19.98 | 8.51E-89  | 1.14E-85  |
| ENSG00000168685 | IL7R            | interleukin 7 receptor [Source:HGNC Symbol;Acc:HGNC:6024]                                | 202   | 1.0 | 0.15 | 6.49  | 8.54E-11  | 2.12E-09  |
| ENSG00000183091 | NEB             | nebulin [Source:HGNC Symbol;Acc:HGNC:7720]                                               | 51    | 1.0 | 0.26 | 3.66  | 2.53E-04  | 0.0019297 |
| ENSG00000258115 | ENSG00000258115 | novel transcript, antisense to TPH2                                                      | 105   | 1.0 | 0.18 | 5.21  | 1.93E-07  | 2.89E-06  |
| ENSG00000122641 | INHBA           | inhibin subunit beta A [Source:HGNC Symbol;Acc:HGNC:6066]                                | 116   | 1.0 | 0.19 | 5.18  | 2.24E-07  | 3.33E-06  |

|                 |                 |                                                                                             |      |     |      |       |           |           |
|-----------------|-----------------|---------------------------------------------------------------------------------------------|------|-----|------|-------|-----------|-----------|
| ENSG00000128564 | VGF             | VGF nerve growth factor inducible [Source:HGNC Symbol;Acc:HGNC:12684]                       | 1150 | 1.0 | 0.24 | 4.08  | 4.53E-05  | 4.25E-04  |
| ENSG00000149633 | KIAA1755        | KIAA1755 [Source:HGNC Symbol;Acc:HGNC:29372]                                                | 67   | 1.0 | 0.25 | 3.93  | 8.52E-05  | 7.45E-04  |
| ENSG00000224080 | UBE2FP1         | UBE2F pseudogene 1 [Source:HGNC Symbol;Acc:HGNC:44535]                                      | 37   | 1.0 | 0.32 | 3.02  | 0.0025159 | 0.0139025 |
| ENSG00000277778 | PGM5P2          | phosphoglucomutase 5 pseudogene 2 [Source:HGNC Symbol;Acc:HGNC:18965]                       | 111  | 1.0 | 0.20 | 4.89  | 1.01E-06  | 1.34E-05  |
| ENSG0000019549  | SNAI2           | snail family transcriptional repressor 2 [Source:HGNC Symbol;Acc:HGNC:11094]                | 182  | 1.0 | 0.14 | 6.84  | 7.89E-12  | 2.23E-10  |
| ENSG00000107295 | SH3GL2          | SH3 domain containing GRB2 like 2, endophilin A1 [Source:HGNC Symbol;Acc:HGNC:10831]        | 62   | 1.0 | 0.24 | 4.11  | 4.02E-05  | 3.81E-04  |
| ENSG00000125810 | CD93            | CD93 molecule [Source:HGNC Symbol;Acc:HGNC:15855]                                           | 46   | 1.0 | 0.31 | 3.16  | 0.0015681 | 0.0092962 |
| ENSG00000225383 | SFTA1P          | surfactant associated 1, lncRNA [Source:HGNC Symbol;Acc:HGNC:18383]                         | 28   | 1.0 | 0.37 | 2.66  | 0.0077434 | 0.0349137 |
| ENSG00000176697 | BDNF            | brain derived neurotrophic factor [Source:HGNC Symbol;Acc:HGNC:1033]                        | 171  | 1.0 | 0.15 | 6.55  | 5.62E-11  | 1.43E-09  |
| ENSG00000124159 | MATN4           | matrilin 4 [Source:HGNC Symbol;Acc:HGNC:6910]                                               | 37   | 1.0 | 0.33 | 3.04  | 0.0023731 | 0.0132406 |
| ENSG00000184113 | CLDN5           | claudin 5 [Source:HGNC Symbol;Acc:HGNC:2047]                                                | 69   | 1.0 | 0.27 | 3.63  | 2.80E-04  | 0.002103  |
| ENSG00000229261 | ENSG00000229261 | novel transcript, antisense to HKDC1                                                        | 33   | 1.0 | 0.33 | 3.05  | 0.0022744 | 0.0127604 |
| ENSG0000011422  | PLAUR           | plasminogen activator, urokinase receptor [Source:HGNC Symbol;Acc:HGNC:9053]                | 1442 | 1.0 | 0.06 | 16.07 | 3.95E-58  | 1.72E-55  |
| ENSG00000115009 | CCL20           | C-C motif chemokine ligand 20 [Source:HGNC Symbol;Acc:HGNC:10619]                           | 37   | 1.0 | 0.35 | 2.94  | 0.0032625 | 0.01724   |
| ENSG00000174099 | MSRB3           | methionine sulfoxide reductase B3 [Source:HGNC Symbol;Acc:HGNC:27375]                       | 147  | 1.0 | 0.16 | 6.37  | 1.91E-10  | 4.53E-09  |
| ENSG00000023445 | BIRC3           | baculoviral IAP repeat containing 3 [Source:HGNC Symbol;Acc:HGNC:591]                       | 730  | 1.0 | 0.08 | 13.40 | 6.05E-41  | 1.16E-38  |
| ENSG00000230623 | ENSG00000230623 | novel transcript, antisense to ZNF281                                                       | 26   | 1.0 | 0.37 | 2.80  | 0.0051823 | 0.0251609 |
| ENSG00000081041 | CXCL2           | C-X-C motif chemokine ligand 2 [Source:HGNC Symbol;Acc:HGNC:4603]                           | 68   | 1.0 | 0.27 | 3.84  | 1.21E-04  | 0.0010103 |
| ENSG00000067798 | NAV3            | neuron navigator 3 [Source:HGNC Symbol;Acc:HGNC:15998]                                      | 309  | 1.0 | 0.12 | 8.80  | 1.33E-18  | 7.01E-17  |
| ENSG00000154734 | ADAMTS1         | ADAM metalloproteinase with thrombospondin type 1 motif 1 [Source:HGNC Symbol;Acc:HGNC:217] | 1459 | 1.1 | 0.06 | 18.19 | 6.09E-74  | 4.27E-71  |
| ENSG00000163735 | CXCL5           | C-X-C motif chemokine ligand 5 [Source:HGNC Symbol;Acc:HGNC:10642]                          | 243  | 1.1 | 0.14 | 7.64  | 2.26E-14  | 8.05E-13  |
| ENSG00000157570 | TSPAN18         | tetraspanin 18 [Source:HGNC Symbol;Acc:HGNC:20660]                                          | 54   | 1.1 | 0.26 | 4.00  | 6.30E-05  | 5.69E-04  |
| ENSG00000095752 | IL11            | interleukin 11 [Source:HGNC Symbol;Acc:HGNC:5966]                                           | 122  | 1.1 | 0.20 | 5.43  | 5.79E-08  | 9.48E-07  |
| ENSG00000026103 | FAS             | Fas cell surface death receptor [Source:HGNC Symbol;Acc:HGNC:11920]                         | 120  | 1.1 | 0.18 | 6.06  | 1.32E-09  | 2.76E-08  |
| ENSG00000164509 | IL31RA          | interleukin 31 receptor A [Source:HGNC Symbol;Acc:HGNC:18969]                               | 165  | 1.1 | 0.15 | 7.23  | 4.82E-13  | 1.54E-11  |
| ENSG00000203706 | SERTAD4-AS1     | SERTAD4 antisense RNA 1 [Source:HGNC Symbol;Acc:HGNC:32019]                                 | 38   | 1.1 | 0.31 | 3.52  | 4.25E-04  | 0.0030398 |
| ENSG00000134954 | ETS1            | ETS proto-oncogene 1, transcription factor [Source:HGNC Symbol;Acc:HGNC:3488]               | 818  | 1.1 | 0.07 | 15.16 | 6.53E-52  | 2.34E-49  |
| ENSG00000047617 | ANO2            | anoctamin 2 [Source:HGNC Symbol;Acc:HGNC:1183]                                              | 70   | 1.1 | 0.24 | 4.59  | 4.42E-06  | 5.15E-05  |
| ENSG00000214711 | CAPN14          | calpain 14 [Source:HGNC Symbol;Acc:HGNC:16664]                                              | 604  | 1.1 | 0.08 | 13.54 | 8.95E-42  | 1.85E-39  |
| ENSG00000168621 | GDNF            | glial cell derived neurotrophic factor [Source:HGNC Symbol;Acc:HGNC:4232]                   | 94   | 1.1 | 0.20 | 5.39  | 6.92E-08  | 1.12E-06  |
| ENSG00000107249 | GLIS3           | GLIS family zinc finger 3 [Source:HGNC Symbol;Acc:HGNC:28510]                               | 247  | 1.1 | 0.12 | 9.09  | 9.65E-20  | 5.58E-18  |
| ENSG00000136244 | IL6             | interleukin 6 [Source:HGNC Symbol;Acc:HGNC:6018]                                            | 640  | 1.1 | 0.09 | 12.75 | 3.00E-37  | 4.88E-35  |
| ENSG00000092969 | TGFB2           | transforming growth factor beta 2 [Source:HGNC Symbol;Acc:HGNC:11768]                       | 682  | 1.1 | 0.09 | 13.12 | 2.57E-39  | 4.61E-37  |
| ENSG00000139926 | FRMD6           | FERM domain containing 6 [Source:HGNC Symbol;Acc:HGNC:19839]                                | 1578 | 1.1 | 0.06 | 18.73 | 2.88E-78  | 2.32E-75  |
| ENSG00000138675 | FGF5            | fibroblast growth factor 5 [Source:HGNC Symbol;Acc:HGNC:3683]                               | 51   | 1.1 | 0.27 | 4.18  | 2.94E-05  | 2.89E-04  |
| ENSG00000169184 | MN1             | MN1 proto-oncogene, transcriptional regulator [Source:HGNC Symbol;Acc:HGNC:7180]            | 34   | 1.1 | 0.34 | 3.39  | 6.91E-04  | 0.0046205 |
| ENSG00000230836 | LINC01293       | long intergenic non-protein coding RNA 1293 [Source:HGNC Symbol;Acc:HGNC:50362]             | 30   | 1.1 | 0.34 | 3.30  | 9.69E-04  | 0.0061695 |
| ENSG00000110328 | GALNT18         | polypeptide N-acetylgalactosaminyltransferase 18 [Source:HGNC Symbol;Acc:HGNC:30488]        | 69   | 1.1 | 0.25 | 4.61  | 3.95E-06  | 4.66E-05  |
| ENSG00000163739 | CXCL1           | C-X-C motif chemokine ligand 1 [Source:HGNC Symbol;Acc:HGNC:4602]                           | 67   | 1.1 | 0.26 | 4.42  | 9.65E-06  | 1.05E-04  |
| ENSG00000175592 | FOSL1           | FOS like 1, AP-1 transcription factor subunit [Source:HGNC Symbol;Acc:HGNC:13718]           | 234  | 1.2 | 0.13 | 8.59  | 8.92E-18  | 4.34E-16  |
| ENSG00000169429 | CXCL8           | C-X-C motif chemokine ligand 8 [Source:HGNC Symbol;Acc:HGNC:6025]                           | 363  | 1.2 | 0.35 | 3.32  | 9.10E-04  | 0.0058534 |
| ENSG00000139278 | GLIPR1          | GLI pathogenesis related 1 [Source:HGNC Symbol;Acc:HGNC:17001]                              | 595  | 1.2 | 0.08 | 14.13 | 2.32E-45  | 6.45E-43  |

|                 |                 |                                                                                                |       |     |      |       |           |           |
|-----------------|-----------------|------------------------------------------------------------------------------------------------|-------|-----|------|-------|-----------|-----------|
| ENSG0000050344  | NFE2L3          | nuclear factor, erythroid 2 like 3 [Source:HGNC Symbol;Acc:HGNC:7783]                          | 291   | 1.2 | 0.12 | 9.30  | 1.39E-20  | 8.44E-19  |
| ENSG00000106714 | CNTNAP3         | contactin associated protein family member 3 [Source:HGNC Symbol;Acc:HGNC:13834]               | 29    | 1.2 | 0.37 | 3.20  | 0.0013516 | 0.0081966 |
| ENSG00000144821 | MYH15           | myosin heavy chain 15 [Source:HGNC Symbol;Acc:HGNC:31073]                                      | 600   | 1.2 | 0.09 | 13.68 | 1.30E-42  | 3.00E-40  |
| ENSG00000036672 | USP2            | ubiquitin specific peptidase 2 [Source:HGNC Symbol;Acc:HGNC:12618]                             | 104   | 1.2 | 0.19 | 6.13  | 8.71E-10  | 1.88E-08  |
| ENSG00000169067 | ACTBL2          | actin beta like 2 [Source:HGNC Symbol;Acc:HGNC:17780]                                          | 161   | 1.2 | 0.15 | 7.71  | 1.22E-14  | 4.41E-13  |
| ENSG00000074047 | GLI2            | GLI family zinc finger 2 [Source:HGNC Symbol;Acc:HGNC:4318]                                    | 116   | 1.2 | 0.18 | 6.68  | 2.38E-11  | 6.41E-10  |
| ENSG00000206432 | TMEM200C        | transmembrane protein 200C [Source:HGNC Symbol;Acc:HGNC:37208]                                 | 61    | 1.2 | 0.24 | 4.91  | 8.88E-07  | 1.19E-05  |
| ENSG00000050555 | LAMC3           | laminin subunit gamma 3 [Source:HGNC Symbol;Acc:HGNC:6494]                                     | 38    | 1.2 | 0.31 | 3.80  | 1.43E-04  | 0.0011741 |
| ENSG00000156414 | TDRD9           | tudor domain containing 9 [Source:HGNC Symbol;Acc:HGNC:20122]                                  | 25    | 1.2 | 0.38 | 3.19  | 0.0014332 | 0.0086009 |
| ENSG00000078401 | EDN1            | endothelin 1 [Source:HGNC Symbol;Acc:HGNC:3176]                                                | 532   | 1.2 | 0.09 | 13.80 | 2.52E-43  | 6.25E-41  |
| ENSG00000233117 | LINC00702       | long intergenic non-protein coding RNA 702 [Source:HGNC Symbol;Acc:HGNC:44676]                 | 27    | 1.2 | 0.38 | 3.27  | 0.0010675 | 0.0067028 |
| ENSG00000113578 | FGF1            | fibroblast growth factor 1 [Source:HGNC Symbol;Acc:HGNC:3665]                                  | 45    | 1.3 | 0.29 | 4.42  | 9.95E-06  | 1.08E-04  |
| ENSG00000180287 | PLD5            | phospholipase D family member 5 [Source:HGNC Symbol;Acc:HGNC:26879]                            | 54    | 1.3 | 0.27 | 4.64  | 3.41E-06  | 4.08E-05  |
| ENSG00000266088 | ENSG00000266088 | novel transcript                                                                               | 43    | 1.3 | 0.29 | 4.42  | 9.89E-06  | 1.07E-04  |
| ENSG00000041982 | TNC             | tenascin C [Source:HGNC Symbol;Acc:HGNC:5318]                                                  | 3991  | 1.3 | 0.04 | 31.49 | 1.16E-217 | 9.39E-214 |
| ENSG00000104856 | RELB            | RELB proto-oncogene, NF-kB subunit [Source:HGNC Symbol;Acc:HGNC:9956]                          | 742   | 1.3 | 0.08 | 16.89 | 5.15E-64  | 2.77E-61  |
| ENSG00000106366 | SERPINE1        | serpin family E member 1 [Source:HGNC Symbol;Acc:HGNC:8583]                                    | 817   | 1.3 | 0.20 | 6.47  | 1.01E-10  | 2.49E-09  |
| ENSG00000176136 | MC5R            | melanocortin 5 receptor [Source:HGNC Symbol;Acc:HGNC:6933]                                     | 35    | 1.3 | 0.33 | 4.00  | 6.45E-05  | 5.80E-04  |
| ENSG00000116983 | HPCAL4          | hippocalcin like 4 [Source:HGNC Symbol;Acc:HGNC:18212]                                         | 96    | 1.3 | 0.20 | 6.66  | 2.73E-11  | 7.26E-10  |
| ENSG00000211592 | IGKC            | immunoglobulin kappa constant [Source:HGNC Symbol;Acc:HGNC:5716]                               | 46    | 1.3 | 0.32 | 4.04  | 5.25E-05  | 4.84E-04  |
| ENSG00000135919 | SERPINE2        | serpin family E member 2 [Source:HGNC Symbol;Acc:HGNC:8951]                                    | 1198  | 1.3 | 0.13 | 9.93  | 3.03E-23  | 2.25E-21  |
| ENSG00000133048 | CHI3L1          | chitinase 3 like 1 [Source:HGNC Symbol;Acc:HGNC:1932]                                          | 166   | 1.3 | 0.18 | 7.20  | 5.95E-13  | 1.86E-11  |
| ENSG00000163121 | NEURL3          | neutralized E3 ubiquitin protein ligase 3 [Source:HGNC Symbol;Acc:HGNC:25162]                  | 186   | 1.3 | 0.16 | 8.47  | 2.39E-17  | 1.14E-15  |
| ENSG00000170989 | S1PR1           | sphingosine-1-phosphate receptor 1 [Source:HGNC Symbol;Acc:HGNC:3165]                          | 331   | 1.3 | 0.11 | 12.04 | 2.19E-33  | 2.97E-31  |
| ENSG00000118523 | CCN2            | cellular communication network factor 2 [Source:HGNC Symbol;Acc:HGNC:2500]                     | 483   | 1.3 | 0.09 | 13.89 | 6.90E-44  | 1.82E-41  |
| ENSG00000142871 | CCN1            | cellular communication network factor 1 [Source:HGNC Symbol;Acc:HGNC:2654]                     | 11719 | 1.3 | 0.03 | 40.41 | 0         | 0         |
| ENSG00000138356 | AOX1            | aldehyde oxidase 1 [Source:HGNC Symbol;Acc:HGNC:553]                                           | 142   | 1.3 | 0.17 | 7.80  | 6.08E-15  | 2.29E-13  |
| ENSG00000148677 | ANKRD1          | ankyrin repeat domain 1 [Source:HGNC Symbol;Acc:HGNC:15819]                                    | 1472  | 1.3 | 0.06 | 20.98 | 9.20E-98  | 1.35E-94  |
| ENSG00000113070 | HBEGF           | heparin binding EGF like growth factor [Source:HGNC Symbol;Acc:HGNC:3059]                      | 735   | 1.3 | 0.08 | 16.57 | 1.10E-61  | 5.39E-59  |
| ENSG00000197646 | PDCD1LG2        | programmed cell death 1 ligand 2 [Source:HGNC Symbol;Acc:HGNC:18731]                           | 82    | 1.3 | 0.23 | 5.99  | 2.04E-09  | 4.20E-08  |
| ENSG00000275620 | FLJ16779        | uncharacterized LOC100192386 [Source:NCBI gene (formerly Entrezgene);Acc:100192386]            | 31    | 1.4 | 0.36 | 3.74  | 1.86E-04  | 0.0014725 |
| ENSG00000271303 | SRXN1           | sulfiredoxin 1 [Source:HGNC Symbol;Acc:HGNC:16132]                                             | 29    | 1.4 | 0.40 | 3.42  | 6.34E-04  | 0.0042966 |
| ENSG00000282057 | ENSG00000282057 | novel transcript                                                                               | 52    | 1.4 | 0.27 | 5.11  | 3.25E-07  | 4.67E-06  |
| ENSG00000253660 | ENSG00000253660 | novel transcript                                                                               | 65    | 1.4 | 0.24 | 5.76  | 8.62E-09  | 1.63E-07  |
| ENSG00000198796 | ALPK2           | alpha kinase 2 [Source:HGNC Symbol;Acc:HGNC:20565]                                             | 253   | 1.4 | 0.13 | 10.45 | 1.42E-25  | 1.24E-23  |
| ENSG00000115221 | ITGB6           | integrin subunit beta 6 [Source:HGNC Symbol;Acc:HGNC:6161]                                     | 534   | 1.4 | 0.09 | 15.21 | 2.98E-52  | 1.09E-49  |
| ENSG00000255346 | NOX5            | NADPH oxidase 5 [Source:HGNC Symbol;Acc:HGNC:14874]                                            | 67    | 1.4 | 0.24 | 5.95  | 2.64E-09  | 5.34E-08  |
| ENSG00000248713 | C4orf54         | chromosome 4 open reading frame 54 [Source:HGNC Symbol;Acc:HGNC:27741]                         | 86    | 1.4 | 0.21 | 6.66  | 2.74E-11  | 7.28E-10  |
| ENSG00000215218 | UBE2QL1         | ubiquitin conjugating enzyme E2 Q family like 1 [Source:HGNC Symbol;Acc:HGNC:37269]            | 205   | 1.4 | 0.14 | 10.43 | 1.77E-25  | 1.55E-23  |
| ENSG00000101198 | NKAIN4          | sodium/potassium transporting ATPase interacting 4 [Source:HGNC Symbol;Acc:HGNC:16191]         | 361   | 1.4 | 0.11 | 13.28 | 3.21E-40  | 6.09E-38  |
| ENSG00000163734 | CXCL3           | C-X-C motif chemokine ligand 3 [Source:HGNC Symbol;Acc:HGNC:4604]                              | 40    | 1.5 | 0.33 | 4.40  | 1.07E-05  | 1.14E-04  |
| ENSG00000166106 | ADAMTS15        | ADAM metalloproteinase with thrombospondin type 1 motif 15 [Source:HGNC Symbol;Acc:HGNC:16305] | 139   | 1.5 | 0.17 | 8.59  | 8.45E-18  | 4.13E-16  |

|                 |                 |                                                                                      |      |     |      |       |           |           |
|-----------------|-----------------|--------------------------------------------------------------------------------------|------|-----|------|-------|-----------|-----------|
| ENSG00000203721 | LINC00862       | long intergenic non-protein coding RNA 862 [Source:HGNC Symbol;Acc:HGNC:21901]       | 238  | 1.5 | 0.13 | 11.31 | 1.11E-29  | 1.25E-27  |
| ENSG00000135625 | EGR4            | early growth response 4 [Source:HGNC Symbol;Acc:HGNC:3241]                           | 31   | 1.5 | 0.36 | 4.22  | 2.44E-05  | 2.44E-04  |
| ENSG00000174792 | ODAPH           | odontogenesis associated phosphoprotein [Source:HGNC Symbol;Acc:HGNC:26300]          | 287  | 1.5 | 0.12 | 12.77 | 2.52E-37  | 4.23E-35  |
| ENSG00000157168 | NRG1            | neuregulin 1 [Source:HGNC Symbol;Acc:HGNC:7997]                                      | 81   | 1.5 | 0.24 | 6.35  | 2.15E-10  | 5.06E-09  |
| ENSG00000169994 | MYO7B           | myosin VIIB [Source:HGNC Symbol;Acc:HGNC:7607]                                       | 31   | 1.5 | 0.36 | 4.31  | 1.65E-05  | 1.71E-04  |
| ENSG00000178776 | C5orf46         | chromosome 5 open reading frame 46 [Source:HGNC Symbol;Acc:HGNC:33768]               | 32   | 1.6 | 0.35 | 4.58  | 4.76E-06  | 5.49E-05  |
| ENSG00000254842 | LINC02551       | long intergenic non-protein coding RNA 2551 [Source:HGNC Symbol;Acc:HGNC:53586]      | 122  | 1.6 | 0.18 | 8.81  | 1.28E-18  | 6.83E-17  |
| ENSG00000162614 | NEXN            | nexilin F-actin binding protein [Source:HGNC Symbol;Acc:HGNC:29557]                  | 214  | 1.6 | 0.15 | 11.06 | 1.91E-28  | 2.04E-26  |
| ENSG00000178172 | SPINK6          | serine peptidase inhibitor Kazal type 6 [Source:HGNC Symbol;Acc:HGNC:29486]          | 1015 | 1.6 | 0.07 | 22.87 | 8.51E-116 | 2.29E-112 |
| ENSG00000260604 | ENSG00000260604 | novel transcript                                                                     | 108  | 1.7 | 0.20 | 8.48  | 2.24E-17  | 1.07E-15  |
| ENSG00000165617 | DACT1           | dishevelled binding antagonist of beta catenin 1 [Source:HGNC Symbol;Acc:HGNC:17748] | 248  | 1.8 | 0.13 | 13.45 | 3.00E-41  | 5.89E-39  |
| ENSG00000138798 | EGF             | epidermal growth factor [Source:HGNC Symbol;Acc:HGNC:3229]                           | 228  | 1.8 | 0.14 | 13.12 | 2.57E-39  | 4.61E-37  |
| ENSG00000144583 | MARCHF4         | membrane associated ring-CH-type finger 4 [Source:HGNC Symbol;Acc:HGNC:29269]        | 47   | 1.8 | 0.30 | 6.15  | 7.74E-10  | 1.68E-08  |
| ENSG00000008517 | IL32            | interleukin 32 [Source:HGNC Symbol;Acc:HGNC:16830]                                   | 199  | 1.9 | 0.15 | 12.76 | 2.67E-37  | 4.44E-35  |
| ENSG00000169594 | BNC1            | basonuclin 1 [Source:HGNC Symbol;Acc:HGNC:1081]                                      | 30   | 2.0 | 0.38 | 5.18  | 2.24E-07  | 3.33E-06  |
| ENSG00000120051 | CFAP58          | cilia and flagella associated protein 58 [Source:HGNC Symbol;Acc:HGNC:26676]         | 63   | 2.4 | 0.28 | 8.50  | 1.91E-17  | 9.18E-16  |

**Supplementary Table 8:** Shown are genes that are significantly differentially expressed between H1650-Tr-BrM-S100A9i and H1650-Tr-BrM-Lenti-Con identified by RNA-sequencing. Differential expression statistics from DESeq2 analysis are included for all significantly differentially expressed genes. See also accompanying Supplementary Fig. 4.
